# Supplementary material
Source: PubMed Central journal article supplement (PMC4198503)
Supplement: NIHMS605876-supplement-supplement_1.pdf [file NIHMS605876-supplement-supplement_1.pdf]

**Supplementary Table 1. Complete Screening Data**

Please see attached spreadsheet.

**Supplementary Table 2. Sources of *Hepcidin* modulators identified in the screen that were characterized further in quantitative realtime RT-PCR and/or Western blot experiments.**  
Ph represents a Phenyl group.

| Regulator Name | Structure                                                                           | Functional Category                  | Vendor            | Item #      |
|----------------|-------------------------------------------------------------------------------------|--------------------------------------|-------------------|-------------|
| Ipriflavone    | 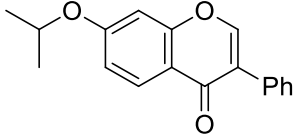   | Isoflavone                           | LKT Laboratories  | I6068-1g    |
| Vorinostat     |    | Anti-neoplastic                      | Selleck Chemicals | S1047       |
| GTP 14564      |    | Kinase Inhibitor                     | R&D Systems       | 2086        |
| AG-1296        |    | Kinase Inhibitor                     | Cayman Chemical   | 10010592    |
| Amlexanox      |   | Anti-inflammatory                    | LKT laboratories  | A4944-500mg |
| Leflunomide    |  | Anti-inflammatory                    | Selleck Chemicals | S1247       |
| SB 204741      |  | Serotonin 5-HT2B receptor antagonist | Sigma-Aldrich     | S0693-10MG  |
| Nabumetone     |  | Anti-inflammatory                    | Sigma-Aldrich     | N6142-5G    |
| Pterostilbene  |  | Anti-oxidant                         | LKT laboratories  | P7718-50mg  |

| Regulator Name          | Structure                                                                           | Functional Category        | Vendor            | Item #    |
|-------------------------|-------------------------------------------------------------------------------------|----------------------------|-------------------|-----------|
| Doxorubicin             | 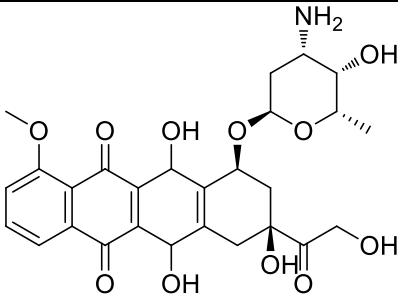   | Anti-neoplastic            | Selleck Chemicals | S1208     |
| Daunorubicin            |    | Anti-neoplastic            | Selleck Chemicals | S3035     |
| 9-Aminoacridine         |    | Anti-microbial             | Sigma-Aldrich     | 92817-1G  |
| Ethacridine Lactate     |   | Anti-microbial             | LKT Laboratories  | E7228-25g |
| Lansoprazole            |  | Proton pump inhibitor      | Selleck Chemicals | S1354     |
| Topotecan hydrochloride |  | Anti-neoplastic            | Selleck Chemicals | S1231     |
| Camptothecin            |  | Anti-neoplastic            | Selleck Chemicals | S1288     |
| Chrysin                 |  | Anti-inflammatory, flavone | Selleck Chemicals | S2281     |

| Regulator Name                | Structure                                                                         | Functional Category | Vendor            | Item #      |
|-------------------------------|-----------------------------------------------------------------------------------|---------------------|-------------------|-------------|
| AS-252424                     | 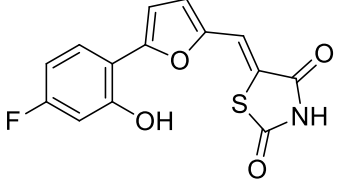 | Kinase Inhibitor    | Selleck Chemicals | S2671       |
| Phenazopyridine hydrochloride |  | Analgesic           | Sigma-Aldrich     | 34076-100MG |
| SU-6668                       |  | Kinase inhibitor    | Selleck Chemicals | S1470       |

**Supplementary Table 3. Primers and probes used in realtime quantitative RT-PCR assays**

| <b>Primer Name</b> | <b>Species</b> | <b>Sequence</b>                 | <b>Citation or Manufacturer</b> |
|--------------------|----------------|---------------------------------|---------------------------------|
| Hepcidin           | Human          | 5'-CCTGACCAGTGGCTCTGTTT-3'      | [1]                             |
|                    |                | 5'-CACATCCCACACTTTGATCG-3'      |                                 |
| G3PD               | Human          | 5'-TGGTATCGTGGAAGGACTC- 3'      | [1]                             |
|                    |                | 5'-AGTAGAGGCAGGGATGATG-3'       |                                 |
| ID1                | Human          | 5'-GTAAACGTGCTGCTCTACGACATGA-3' | [2]                             |
|                    |                | 5'-AGCTCCAACCTGAAGGTCCCTGA-3'   |                                 |
| ID3                | Human          | 5'-TCAGCTTAGCCAGGTGGAAATC-3'    | [2]                             |
|                    |                | 5'-GGCTGTCTGGATGGGAAGGT-3'      |                                 |
| SOCS3              | Human          | Taqman Assay Hs02330328_s1      | Life Technologies               |
| VEGFA              | Human          | Taqman Assay Hs00900055_m1      | Life Technologies               |
| IL-6 Receptor      | Human          | Taqman Assay Hs01075667_m1      | Life Technologies               |
| 18S                | Eukaryotic     | Taqman Assay 4310893E           | Life Technologies               |

## REFERENCES

1. Nemeth, E., et al., *IL-6 mediates hypoferrremia of inflammation by inducing the synthesis of the iron regulatory hormone hepcidin*. J Clin Invest, 2004. 113(9): p. 1271-6.
2. Feng, X., et al., *Olf1/EBF associated zinc finger protein interfered with antinuclear antibody production in patients with systemic lupus erythematosus*. Arthritis Res Ther, 2010. 12(2): p. R59.

**Supplementary Figure 1. Effect of treatment with Hepcidin stimulating agents for 24**

**hours on P-Stat3 and Stat3 protein levels.** **A.** Following 16 hours of serum starvation in  $\alpha$ -MEM/1%FBS, HepG2 cells were treated for 24 hours in  $\alpha$ -MEM/1%FBS with the chemicals at the same concentrations as given in Figure 2. Protein was extracted from the cells, separated by SDS-PAGE, and blotted for incubation with antibodies against P-Stat3. Following immunoblotting, the membranes were stripped and re-probed with antibody against Stat3. The blots were then stripped again and probed for  $\beta$ -actin as a loading control. Each chemical was evaluated in three biological replicates. **B.** Protein levels were measured as fold-change over DMSO-treated control by densitometry analysis using Image Studio Lite Version 3.1.4 (LiCor Biosciences, Lincoln, NE). The global P-value generated using the Kruskal-Wallis test was  $<0.05$ . Unpaired Student's t-tests were performed compared to DMSO alone. \* denotes  $0.009 \leq P < 0.05$ , \*\*denotes  $0.0009 \leq P < 0.009$ .

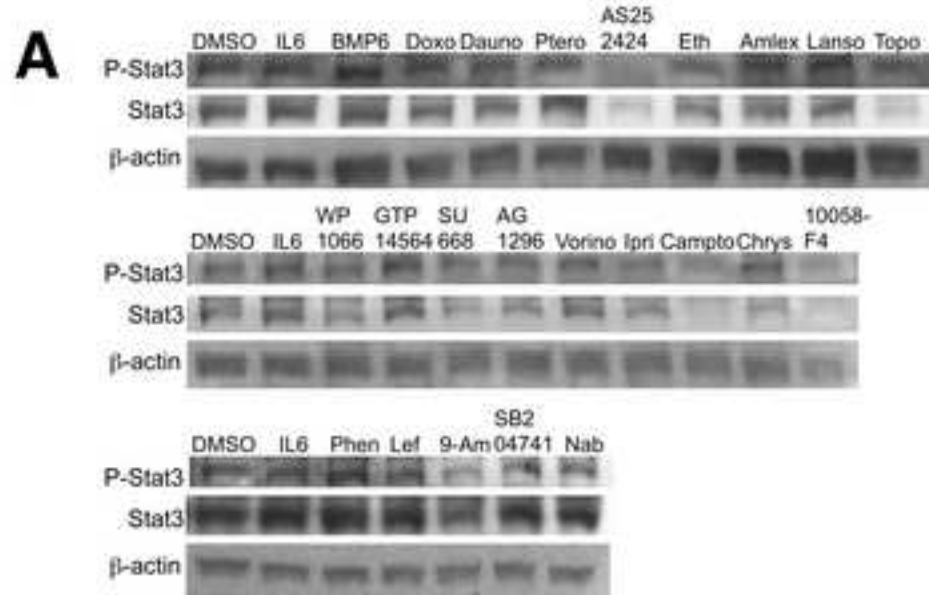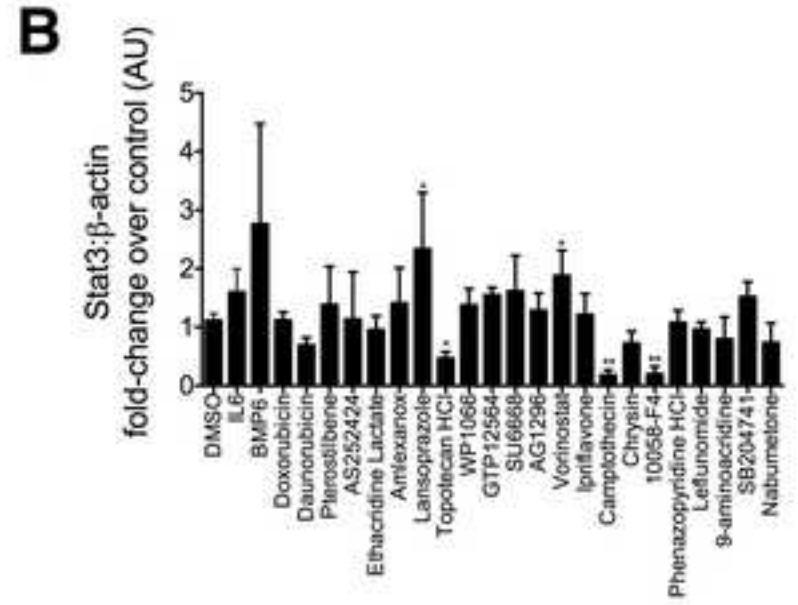

# Primary Screen Data

| Plate    | Well | Type<br>(X=experimental;<br>N=negative<br>control;<br>P=positive<br>control;<br>E=empty) | CrosstalkCorr<br>_Luminescen<br>ce_A | Luminescence<br>_A | z score<br>Corrium_A | CrosstalkCorr<br>_Luminescen<br>ce_B | Luminescence<br>_B | z score<br>Corrium_B | Viability_A | z score<br>Viability_A | Viability_B | z score<br>Viability_B | Library Well Type                     | Reagent Vendi<br>Vendor             | Reagent ID | Compound Names (where available) | Screening                | Screening                |
|----------|------|------------------------------------------------------------------------------------------|--------------------------------------|--------------------|----------------------|--------------------------------------|--------------------|----------------------|-------------|------------------------|-------------|------------------------|---------------------------------------|-------------------------------------|------------|----------------------------------|--------------------------|--------------------------|
|          |      |                                                                                          |                                      |                    |                      |                                      |                    |                      |             |                        |             |                        |                                       |                                     |            |                                  | (HEPCIDIN<br>STIMULATOR) | (HEPCIDIN<br>REPRESSOR): |
|          |      |                                                                                          |                                      |                    |                      |                                      |                    |                      |             |                        |             |                        | Weak(W)=z<br>score>3,<4;              | Weak(W)=z<br>score<-1,>-<br>2       |            |                                  |                          |                          |
|          |      |                                                                                          |                                      |                    |                      |                                      |                    |                      |             |                        |             |                        | Medium(M)=z-1.5;Medium(<br>score≥4,<5 | Medium(<br>M)=z-score<-<br>1.5,>-2; |            |                                  |                          |                          |
|          |      |                                                                                          |                                      |                    |                      |                                      |                    |                      |             |                        |             |                        | Strong(S)=z-<br>score≥2               |                                     |            |                                  |                          |                          |
| 1577 A01 | X    |                                                                                          | 1394                                 | 1400               | 0.08897685           | 1833                                 | 1840               | 0.36441631           | 1515909     | -2.1184486             | 2016836     | -2.24574297            | experimental                          | ChemBridge                          | 5100670    |                                  |                          |                          |
| 1577 A02 | X    |                                                                                          | 990                                  | 1000               | -0.51027577          | 1067                                 | 1080               | -0.69873206          | 1781337     | -1.26672044            | 2367279     | -1.29969266            | experimental                          | ChemBridge                          | 5108100    |                                  |                          |                          |
| 1577 A03 | X    |                                                                                          | 1190                                 | 1200               | -0.21361606          | 1150                                 | 1160               | -0.58353452          | 1708839     | -1.49935825            | 2489407     | -0.96999786            | experimental                          | ChemBridge                          | 5100219    |                                  |                          |                          |
| 1577 A04 | X    |                                                                                          | 2150                                 | 2160               | 1.21035058           | 2028                                 | 2040               | 0.63506113           | 1882739     | -0.941333              | 2442359     | -1.09700789            | experimental                          | ChemBridge                          | 5108485    |                                  |                          |                          |
| 1577 A05 | X    |                                                                                          | 906                                  | 920                | -0.63487285          | 1426                                 | 1440               | -0.20046801          | 1706025     | -1.50838805            | 2390859     | -1.23603647            | experimental                          | ChemBridge                          | 5100461    |                                  |                          |                          |
| 1577 A06 | X    |                                                                                          | 1628                                 | 1640               | 0.43606872           | 1704                                 | 1720               | 0.18537435           | 1829724     | -1.11145208            | 2260261     | -1.58859674            | experimental                          | ChemBridge                          | 5109412    |                                  |                          |                          |
| 1577 A07 | X    |                                                                                          | 985                                  | 1000               | -0.51769227          | 1944                                 | 1960               | 0.51847567           | 1960387     | -0.69216943            | 2617814     | -0.62335238            | experimental                          | ChemBridge                          | 5100819    |                                  |                          |                          |
| 1577 A08 | X    |                                                                                          | 2190                                 | 2200               | 1.26968252           | 2347                                 | 2360               | 1.0778083            | 2075985     | -0.32122864            | 2486957     | -0.97661184            | experimental                          | ChemBridge                          | 5110193    |                                  |                          |                          |
| 1577 A09 | X    |                                                                                          | 1226                                 | 1240               | -0.16021731          | 1506                                 | 1520               | -0.08943423          | 1804012     | -1.19395896            | 2388224     | -1.24314987            | experimental                          | ChemBridge                          | 5101225    |                                  |                          |                          |
| 1577 A10 | X    |                                                                                          | 1190                                 | 1200               | -0.21361606          | 1108                                 | 1120               | -0.64182726          | 2055314     | -0.38755952            | 2656851     | -0.51796872            | experimental                          | ChemBridge                          | 5116267    |                                  |                          |                          |
| 1577 A11 | X    |                                                                                          | 1149                                 | 1160               | -0.2744313           | 1149                                 | 1160               | -0.58492245          | 1903662     | -0.87419348            | 2486323     | -0.97832338            | experimental                          | ChemBridge                          | 5101885    |                                  |                          |                          |
| 1577 A12 | X    |                                                                                          | 1471                                 | 1480               | 0.20319084           | 1630                                 | 1640               | 0.08266811           | 1991492     | -0.59235703            | 2383045     | -1.25713101            | experimental                          | ChemBridge                          | 5116944    |                                  |                          |                          |
| 1577 A13 | X    |                                                                                          | 987                                  | 1000               | -0.51472567          | 1025                                 | 1040               | -0.75702479          | 2146567     | -0.09473906            | 2647536     | -0.54311534            | experimental                          | ChemBridge                          | 5102245    |                                  |                          |                          |
| 1577 A14 | X    |                                                                                          | 2071                                 | 2080               | 1.09316999           | 2309                                 | 2320               | 1.02506726           | 2012676     | -0.52437999            | 2827214     | -0.05805949            | experimental                          | ChemBridge                          | 5117544    |                                  |                          |                          |
| 1577 A15 | X    |                                                                                          | 1188                                 | 1200               | -0.21658256          | 1205                                 | 1200               | -0.59495725          | 2077707     | -0.31570289            | 2725417     | -0.33286904            | experimental                          | ChemBridge                          | 5102391    |                                  |                          |                          |
| 1577 A16 | X    |                                                                                          | 989                                  | 1000               | -0.51175907          | 1269                                 | 1280               | -0.41837179          | 2337561     | 0.51813899             | 3394762     | 1.47408402             | experimental                          | ChemBridge                          | 5118906    |                                  |                          |                          |
| 1577 A17 | X    |                                                                                          | 1349                                 | 1360               | 0.02222842           | 1106                                 | 1120               | -0.6446031           | 2154352     | -0.06975788            | 2849688     | 0.00261096             | experimental                          | ChemBridge                          | 5103568    |                                  |                          |                          |
| 1577 A18 | X    |                                                                                          | 1591                                 | 1600               | 0.38118667           | 1510                                 | 1520               | -0.08388255          | 2056441     | -0.3839431             | 2498498     | -0.94545594            | experimental                          | ChemBridge                          | 5119052    |                                  |                          |                          |
| 1577 A19 | X    |                                                                                          | 907                                  | 920                | -0.63338956          | 1184                                 | 1200               | -0.53634517          | 1954839     | -0.70997233            | 2784287     | -0.17394453            | experimental                          | ChemBridge                          | 5103898    |                                  |                          |                          |
| 1577 A20 | X    |                                                                                          | 822                                  | 840                | -0.75946993          | 1738                                 | 1760               | 0.23256371           | 1938048     | -0.76385273            | 4081819     | 3.32885211             | experimental                          | ChemBridge                          | 5105989    |                                  |                          |                          |
| 1577 A21 | X    |                                                                                          | 1832                                 | 1840               | 0.73866163           | 3507                                 | 3520               | 2.68773801           | 1478983     | -2.23693992            | 1816816     | -2.78571377            | experimental                          | ChemBridge                          | 5104182    |                                  |                          |                          |
| 1577 A22 | X    |                                                                                          | 840                                  | 840                | 0.75205349           | 1284                                 | 1280               | -0.58462947          | 2084602     | -0.87959164            | 2423        | -0.06474664            | experimental                          | ChemBridge                          | 5106696    |                                  |                          |                          |
| 1577 A23 | X    |                                                                                          | 991                                  | 1000               | -0.50879247          | 827                                  | 840                | -1.03183338          | 1802423     | -1.19905787            | 2087152     | -2.05591902            | empty                                 |                                     |            |                                  |                          |                          |
| 1577 A24 | P    |                                                                                          | 1071                                 | 1080               | -0.39012859          | 1752                                 | 1760               | 0.25199462           | 1649344     | -1.69027091            | 2067410     | -2.10921421            | empty                                 |                                     |            |                                  |                          |                          |
| 1577 B01 | X    |                                                                                          | 950                                  | 960                | -0.56960772          | 1227                                 | 1240               | -0.47666452          | 1981530     | -0.62432395            | 2411002     | -1.18165874            | experimental                          | ChemBridge                          | 5105849    |                                  |                          |                          |
| 1577 B02 | X    |                                                                                          | 990                                  | 1000               | -0.51027577          | 1588                                 | 1600               | 0.02437538           | 2115829     | -0.19337379            | 2787117     | -0.16630471            | experimental                          | ChemBridge                          | 5135339    |                                  |                          |                          |
| 1577 B03 | X    |                                                                                          | 306                                  | 320                | -1.524852            | 265                                  | 280                | -1.81184564          | 2235527     | 0.19072343             | 2781048     | -0.18268848            | experimental                          | ChemBridge                          | 5105276    |                                  |                          |                          |
| 1577 B04 | X    |                                                                                          | 1225                                 | 1240               | -0.16170061          | 1386                                 | 1400               | -0.25984609          | 2091175     | -0.27248566            | 2694236     | -0.41704477            | experimental                          | ChemBridge                          | 5136288    |                                  |                          |                          |
| 1577 B05 | X    |                                                                                          | 1104                                 | 1120               | -0.34117974          | 1145                                 | 1160               | -0.42670586          | 15094714    | 0.8105553              | 2887592     | 0.10431512             | experimental                          | ChemBridge                          | 5100310    |                                  |                          |                          |
| 1577 B06 | X    |                                                                                          | 2306                                 | 2320               | 1.44174515           | 2145                                 | 2160               | 0.79744803           | 2084002     | -0.78537465            | 2725080     | -1.13285566            | experimental                          | ChemBridge                          | 5194288    |                                  |                          |                          |
| 1577 B07 | X    |                                                                                          | 1384                                 | 1400               | 0.07414387           | 1303                                 | 1320               | -0.37118243          | 2491169     | 0.10110443             | 2990914     | 0.38386242             | experimental                          | ChemBridge                          | 5176992    |                                  |                          |                          |
| 1577 B08 | X    |                                                                                          | 1182                                 | 1200               | -0.22548245          | 942                                  | 960                | -0.87222233          | 2171497     | -0.01474153            | 2752303     | -0.26028802            | experimental                          | ChemBridge                          | 5195236    |                                  |                          |                          |
| 1577 B09 | X    |                                                                                          | 1267                                 | 1280               | -0.09402007          | 1225                                 | 1240               | -0.47944036          | 2347619     | 0.55041387             | 2895244     | 0.12607914             | experimental                          | ChemBridge                          | 5181147    |                                  |                          |                          |
| 1577 B10 | X    |                                                                                          | 1106                                 | 1120               | -0.33821314          | 1428                                 | 1440               | -0.19769216          | 2391434     | 0.69101112             | 3140201     | 0.78687521             | experimental                          | ChemBridge                          | 5209100    |                                  |                          |                          |
| 1577 B11 | X    |                                                                                          | 1066                                 | 1080               | -0.39754508          | 864                                  | 880                | -0.98048026          | 2594704     | 1.34328143             | 3088610     | 0.64760079             | experimental                          | ChemBridge                          | 5182760    |                                  |                          |                          |
| 1577 B12 | X    |                                                                                          | 1107                                 | 1120               | -0.33672984          | 1164                                 | 1160               | -0.59047414          | 2258983     | 0.26599106             | 2885189     | -0.70338154            | experimental                          | ChemBridge                          | 5120550    |                                  |                          |                          |
| 1577 B13 | X    |                                                                                          | 1067                                 | 1080               | -0.39606178          | 1106                                 | 1120               | -0.6446031           | 2259886     | 0.26920957             | 2823307     | -1.08067409            | experimental                          | ChemBridge                          | 5186096    |                                  |                          |                          |
| 1577 B14 | X    |                                                                                          | 1064                                 | 1080               | -0.40051168          | 1622                                 | 1640               | 0.07156474           | 2312832     | 0.43878635             | 2739671     | -0.29438917            | experimental                          | ChemBridge                          | 5211456    |                                  |                          |                          |
| 1577 B15 | X    |                                                                                          | 1185                                 | 1200               | -0.27017681          | 1621                                 | 1640               | 0.07017681           | 2490732     | 1.00964715             | 3022024     | 0.46784647             | experimental                          | ChemBridge                          | 5190278    |                                  |                          |                          |
| 1577 B16 | X    |                                                                                          | 1067                                 | 1080               | -0.39606178          | 1303                                 | 1320               | -0.37118243          | 2242810     | 0.21409375             | 3042926     | 0.52427318             | experimental                          | ChemBridge                          | 5190737    |                                  |                          |                          |
| 1577 B17 | X    |                                                                                          | 1307                                 | 1320               | -0.04007012          | 2066                                 | 2080               | 0.68780218           | 2097408     | -0.25248468            | 3045015     | 0.52991261             | experimental                          | ChemBridge                          | 5132935    |                                  |                          |                          |
| 1577 B18 | X    |                                                                                          | 822                                  | 840                | -0.75946993          | 1220                                 | 1240               | -0.48637997          | 2268646     | 0.2699852              | 3011512     | 0.43946845             | experimental                          | ChemBridge                          | 5190950    |                                  |                          |                          |
| 1577 B19 | X    |                                                                                          | 2182                                 | 2200               | 1.25781613           | 2142                                 | 2160               | 0.79328426           | 5520153     | 10.73077134            | 5648520     | 7.58829307             | experimental                          | ChemBridge                          | 5133814    |                                  |                          |                          |
| 1577 B20 | X    |                                                                                          | 3347                                 | 3360               | 2.98585897           | 2783                                 | 2800               | 1.68294237           | 2052755     | -0.39577106            | 2839980     | -0.02359666            | experimental                          | ChemBridge                          | 5191765    |                                  |                          |                          |
| 1577 B21 | X    |                                                                                          | 1138                                 | 1160               | -0.29074758          | 1373                                 | 1400               | -0.27407288          | 2104618     | -0.22934861            | 2638055     | -0.56749528            | experimental                          | ChemBridge                          | 5134609    |                                  |                          |                          |
| 1577 B22 | X    |                                                                                          | 1588                                 | 1600               | 0.37673678           | 1585                                 | 1600               | 0.02021162           | 1947072     | -0.73489574            | 2480015     | -0.99535235            | experimental                          | ChemBridge                          | 5192966    |                                  |                          |                          |
| 1577 B23 | N    |                                                                                          | 1341                                 | 1360               | 0.01036203           | 1183                                 | 1200               | -0.53773309          | 1972739     | -0.65253327            | 2645351     | -0.54901393            | empty                                 |                                     |            |                                  |                          |                          |
| 1577 B24 | P    |                                                                                          | 1900                                 | 2200               | 0.83952593           | 1531                                 | 1760               | -0.05473618          | 1888075     | -0.92421038            | 2282717     | -1.52797488            | empty                                 |                                     |            |                                  |                          |                          |
| 1577 C01 | X    |                                                                                          | 911                                  | 920                | -0.62745636          | 1189                                 | 1200               | -0.52940556          | 1723768     | -1.45145279            | 2501070     | -0.93851261            | experimental                          | ChemBridge                          | 5101672    |                                  |                          |                          |
| 1577 C02 | X    |                                                                                          | 1306                                 | 1320               | -0.04155342          | 1384                                 | 1400               | -0.25876074          | 2055074     | -0.38832965            | 2723251     | -0.33871634            | experimental                          | ChemBridge                          | 5108110    |                                  |                          |                          |
| 1577 C03 | X    |                                                                                          | 1225                                 | 1240               | -0.16170061          | 1145                                 | 1160               | -0.98048026          | 2297594     | 0.38989335             | 2835993     | -0.03435984            | experimental                          | ChemBridge                          | 5100310    |                                  |                          |                          |
| 1577 C04 | X    |                                                                                          | 1667                                 | 1680               | 0.49391736           | 1387                                 | 1400               | -0.25459697          | 2421667     | 0.78802545             | 2995888     | 0.39729015             | experimental                          | ChemBridge                          | 5108495    |                                  |                          |                          |
| 1577 C05 | X    |                                                                                          | 1026                                 | 1040               | -0.45687702          | 1105                                 | 1120               | -0.64599102          | 2102459     | -0.23627659            | 2692257     | -0.42238724            | experimental                          | ChemBridge                          | 5100462    |                                  |                          |                          |
| 1577 C06 | X    |                                                                                          | 784                                  | 800                | -0.81583528          | 1065                                 | 1080               | -0.70150791          | 1970748     | -0.65892212            | 2654196     | -0.52513611            | experimental                          | ChemBridge                          | 5109431    |                                  |                          |                          |
| 1577 C07 | X    |                                                                                          | 865                                  | 880                | -0.6956881           | 939                                  | 960                | -0.8763861           | 2214494     | 0.12323093             | 3044299     | 0.52797971             | experimental                          | ChemBridge                          | 5100832    |                                  |                          |                          |
| 1577 C08 | X    |                                                                                          | 1469                                 | 1480               | 0.20022425           | 1348                                 | 1360               | -0.30872594          | 2483036     | 0.98495156             | 2947177     | 0.26579071             | experimental                          | ChemBridge                          | 5110209    |                                  |                          |                          |
| 1577 C09 | X    |                                                                                          | 986                                  | 1000               | -0.51620897          | 1227                                 | 1240               | -0.47666452          | 1988701     | -0.60131303            | 2947070     | 0.26550185             | experimental                          | ChemBridge                          | 5101309    |                                  |                          |                          |
| 1577 C10 | X    |                                                                                          | 1186                                 | 1200               | -0.21964925          | 1105                                 | 1120               | -0.75980164          | 2211140     | 0.11246303             | 2727371     | -0.32705414            | experimental                          | ChemBridge                          | 5116331    |                                  |                          |                          |
| 1577 C11 | X    |                                                                                          | 1369                                 | 1360               | 0.02222842           | 1868                                 | 1880               | 0.41299359           | 1988856     | -0.60081562            | 2639307     | -0.47759374            | experimental                          | ChemBridge                          | 5109107    |                                  |                          |                          |
| 1577 C12 | X    |                                                                                          | 826                                  | 840                | -0.75353674          | 1386                                 | 1400               | -0.25598489          | 2039819     | -0.43728121            | 3184067     | 0.90529517             | experimental                          | ChemBridge                          | 5117019    | BETAMIPRON                       |                          |                          |
| 1577 C13 | X    |                                                                                          | 1348                                 | 1360               | 0.02074512           | 1026                                 | 1040               | -0.75563687          | 2319587     | 0.46046238             | 2639154     | -0.56574325            | experimental                          | ChemBridge                          | 5102267    |                                  |                          |                          |
| 1577 C14 | X    |                                                                                          | 984                                  | 1000               | -0.51917556          | 1221                                 | 1240               | -0.48499205          | 2067597     | -0.34814477            | 3289984     | 1.191227               | experimental                          | ChemBridge                          | 5117604    |                                  |                          |                          |
| 1577 C15 | X    |                                                                                          | 1869                                 | 1880               | 0.79354368           | 2426                                 | 2440               | 1.18745416           | 2102978     | -0.23461118            | 2898437     | 0.13421299             | experimental                          | ChemBridge                          | 5102412    |                                  |                          |                          |
| 1577 C16 | X    |                                                                                          | 906                                  | 920                | -0.63487285          | 822                                  | 840                | -1.03877299          | 2195559     | 0.06247068             | 2903026     | 0.14660138             | experimental                          | ChemBridge                          | 5118936    |                                  |                          |                          |
| 1577 C17 | X    |                                                                                          | 1027                                 | 1040               | -0.45539373          | 1024                                 | 1040               | -0.75841272          | 1966585     | -0.67228075            | 2779010     | -0.18819023            | experimental                          | ChemBridge                          | 5103812    |                                  |                          |                          |
| 1577 C18 | X    |                                                                                          | 1049                                 | 1060               | -0.45391043          | 1238                                 | 1240               | -0.47526767          | 2181427     | -0.01711217            | 2818374     | -0.15365316            | experimental                          | ChemBridge                          | 5190834    |                                  |                          |                          |
| 1577 C19 | X    |                                                                                          | 1066                                 | 1080               | -0.39754508          | 825                                  | 840                |                      |             |                        |             |                        |                                       |                                     |            |                                  |                          |                          |



|          |   |       |       |             |        |        |             |         |             |         |             |              |            |         |
|----------|---|-------|-------|-------------|--------|--------|-------------|---------|-------------|---------|-------------|--------------|------------|---------|
| 1577 D07 | X | 1629  | 1640  | 0.43755202  | 3349   | 3360   | 2.46850631  | 2161204 | -0.04777059 | 2959030 | 0.29778888  | experimental | ChemBridge | 5177011 |
| 1577 D08 | X | 825   | 840   | -0.75502004 | 1060   | 1080   | -0.70844752 | 2328250 | 0.48826095  | 3073539 | 0.60691554  | experimental | ChemBridge | 5195246 |
| 1577 D09 | X | 869   | 880   | -0.6897549  | 986    | 1000   | -0.81115376 | 2567158 | 1.25488946  | 3157175 | 0.83415573  | experimental | ChemBridge | 5181421 |
| 1577 D10 | X | 1189  | 1200  | -0.21509936 | 1269   | 1280   | -0.41837179 | 2326199 | 0.48167953  | 2867556 | 0.29380969  | experimental | ChemBridge | 5209256 |
| 1577 D11 | X | 840   | 840   | -0.7205344  | 904    | 920    | -0.92496338 | 2241684 | 0.77255378  | 3178511 | 0.89031257  | experimental | ChemBridge | 5185003 |
| 1577 D12 | X | 1029  | 1040  | -0.45242713 | 828    | 840    | -1.03044546 | 2528844 | 1.13194421  | 2890504 | 0.11158237  | experimental | ChemBridge | 5210667 |
| 1577 D13 | X | 1223  | 1240  | -0.1646672  | 983    | 1000   | -0.81531753 | 2605669 | 1.37846686  | 2867079 | 0.04955943  | experimental | ChemBridge | 5186249 |
| 1577 D14 | X | 1108  | 1120  | -0.33524654 | 1346   | 1360   | -0.31150178 | 2305809 | 0.41625035  | 3112628 | 0.71243958  | experimental | ChemBridge | 5211581 |
| 1577 D15 | X | 706   | 720   | -0.93153257 | 1061   | 1080   | -0.7070596  | 2303904 | 0.41013742  | 2709693 | -0.3753173  | experimental | ChemBridge | 5190474 |
| 1577 D16 | X | 903   | 920   | -0.63932275 | 1304   | 1320   | -0.36979451 | 2326367 | 0.48221862  | 2842897 | -0.01572191 | experimental | ChemBridge | 5190759 |
| 1577 D17 | X | 1066  | 1080  | -0.39754508 | 1226   | 1240   | -0.47805244 | 2613066 | 1.40220299  | 3106421 | 0.69568327  | experimental | ChemBridge | 5133046 |
| 1577 D18 | X | 1146  | 1160  | -0.2788912  | 1144   | 1160   | -0.59186206 | 2254357 | 0.25114675  | 2856490 | 0.02205337  | experimental | ChemBridge | 5190983 |
| 1577 D19 | X | 1259  | 1280  | -0.11126846 | 1137   | 1160   | -0.60157751 | 2377131 | 0.6451145   | 2860924 | 0.03294349  | experimental | ChemBridge | 5133918 |
| 1577 D20 | X | 1748  | 1760  | 0.61406455  | 2426   | 2440   | 1.18745416  | 1980229 | -0.62849871 | 2641969 | -0.55814393 | experimental | ChemBridge | 5191816 |
| 1577 D21 | X | 827   | 840   | -0.75205344 | 1581   | 1600   | 0.01465993  | 2116661 | -0.190704   | 2531021 | -0.85765737 | experimental | ChemBridge | 5134611 |
| 1577 D22 | X | 307   | 320   | -1.5233687  | 304    | 320    | -1.75771667 | 1149463 | -3.29433199 | 1362626 | -4.01183783 | experimental | ChemBridge | 5193093 |
| 1577 D23 | N | 1338  | 1600  | 0.00591213  | 1527   | 1880   | -0.06028787 | 1931013 | -0.78642724 | 2294361 | -1.49654092 | empty        |            |         |
| 1577 D24 | P | 86135 | 86680 | 125.785182  | 116736 | 117280 | 159.840837  | 2055074 | -0.38632965 | 2735220 | -0.30640502 | empty        |            |         |
| 1577 E01 | X | 1073  | 1080  | -0.38716199 | 1229   | 1240   | -0.47388867 | 1826087 | -1.1231228  | 2399273 | -1.21322217 | experimental | ChemBridge | 5101720 |
| 1577 E02 | X | 628   | 640   | -1.04722986 | 1064   | 1080   | -0.70289583 | 2113864 | -0.19967925 | 2955656 | 0.28868048  | experimental | ChemBridge | 5108143 |
| 1577 E03 | X | 708   | 720   | -0.92856597 | 1024   | 1040   | -0.75841272 | 2043476 | -0.42554631 | 3093490 | 0.66077494  | experimental | ChemBridge | 5100324 |
| 1577 E04 | X | 829   | 840   | -0.74908684 | 986    | 1000   | -0.81115376 | 2189242 | 0.04220015  | 3131179 | 0.76251957  | experimental | ChemBridge | 5108055 |
| 1577 E05 | X | 1188  | 1200  | -0.21658266 | 1427   | 1440   | -0.19908009 | 2113114 | -0.20208592 | 3268589 | 1.1334694   | experimental | ChemBridge | 5100475 |
| 1577 E06 | X | 1188  | 1200  | -0.21658266 | 1025   | 1040   | -0.75702479 | 2576964 | 1.28635593  | 3399253 | 1.48620785  | experimental | ChemBridge | 5109439 |
| 1577 E07 | X | 866   | 880   | -0.6942048  | 861    | 880    | -0.98464403 | 2269611 | 0.3000951   | 2956076 | 0.28981431  | experimental | ChemBridge | 5100963 |
| 1577 E08 | X | 1150  | 1160  | -0.2729488  | 1144   | 1170   | -0.43321519 | 2143240 | 0.82227388  | 2923251 | 0.75032644  | experimental | ChemBridge | 5110248 |
| 1577 E09 | X | 909   | 920   | -0.63042296 | 1307   | 1320   | -0.36563074 | 2239667 | 0.2040802   | 2838457 | -0.02738806 | experimental | ChemBridge | 5101371 |
| 1577 E10 | X | 748   | 760   | -0.86923403 | 985    | 1000   | -0.81254168 | 1994078 | -0.58405885 | 2704557 | -0.38918236 | experimental | ChemBridge | 5116355 |
| 1577 E11 | X | 869   | 880   | -0.6897549  | 1509   | 1520   | -0.08527047 | 1978922 | -0.63269273 | 3090300 | 0.65216327  | experimental | ChemBridge | 5102092 |
| 1577 E12 | X | 986   | 1000  | -0.51620897 | 862    | 880    | -0.98325611 | 2157105 | -0.06092382 | 2856174 | 0.02012047  | experimental | ChemBridge | 5117202 |
| 1577 E13 | X | 2468  | 2480  | 1.68203952  | 2787   | 2800   | 1.68849406  | 2151677 | -0.07834165 | 2777259 | -0.19291721 | experimental | ChemBridge | 5102323 |
| 1577 E14 | X | 1105  | 1120  | -0.33969644 | 1420   | 1440   | -0.20879554 | 2455180 | 0.89556484  | 3125770 | 0.74791752  | experimental | ChemBridge | 5117742 |
| 1577 E15 | X | 983   | 1000  | -0.52065886 | 1582   | 1600   | 0.01604785  | 2311659 | 0.43502233  | 2803733 | -0.12444842 | experimental | ChemBridge | 5102419 |
| 1577 E16 | X | 2959  | 3000  | 0.17481276  | 1827   | 2000   | 2.45187149  | 2396401 | 0.70949785  | 2969488 | 0.90435293  | experimental | ChemBridge | 5119003 |
| 1577 E17 | X | 1539  | 1560  | 0.30405515  | 1260   | 1280   | -0.43086309 | 2184751 | 0.02778904  | 2979663 | 0.3534894   | experimental | ChemBridge | 5103831 |
| 1577 E18 | X | 1460  | 1480  | 0.18687456  | 1779   | 1800   | 0.28946852  | 2310822 | 0.43233649  | 3614329 | 2.06682358  | experimental | ChemBridge | 5119134 |
| 1577 E19 | X | 3226  | 3240  | 2.80637985  | 3583   | 3600   | 2.7932801   | 2503958 | 1.05208787  | 2803514 | -0.12203963 | experimental | ChemBridge | 5104026 |
| 1577 E20 | X | 1536  | 1560  | 0.29960525  | 2690   | 1720   | 0.16594344  | 2454110 | 0.89213133  | 3209768 | 0.97467717  | experimental | ChemBridge | 5106406 |
| 1577 E21 | X | 1667  | 1680  | 0.49391736  | 1303   | 2320   | 1.01673973  | 1944486 | -0.74319392 | 3172608 | 0.87436063  | experimental | ChemBridge | 5104261 |
| 1577 E22 | X | 1266  | 1280  | -0.10088537 | 1102   | 1120   | -0.65015479 | 2282031 | 0.33994946  | 2763517 | -0.23001489 | experimental | ChemBridge | 5106991 |
| 1577 E23 | X | 1800  | 1800  | 0.30100858  | 1527   | 1580   | 0.57674578  | 2144969 | -0.09985866 | 2830205 | -0.79048252 | empty        |            |         |
| 1577 E24 | P | 85061 | 85600 | 124.192119  | 109314 | 109920 | 149.539678  | 2221029 | 0.144200    | 2846811 | -0.00515574 | empty        |            |         |
| 1577 F01 | X | 873   | 880   | -0.68382171 | 1310   | 1320   | -0.36146698 | 1965232 | -0.67662238 | 2751524 | -0.262391   | experimental | ChemBridge | 5107341 |
| 1577 F02 | X | 669   | 680   | -0.98641462 | 1305   | 1320   | -0.36840659 | 1998209 | -0.57080295 | 2799423 | -0.13308363 | experimental | ChemBridge | 5135549 |
| 1577 F03 | X | 950   | 960   | -0.56960772 | 1266   | 1280   | -0.42253555 | 2338867 | 0.5223297   | 2934564 | 0.23174086  | experimental | ChemBridge | 5105502 |
| 1577 F04 | X | 789   | 800   | -0.80841879 | 1027   | 1040   | -0.75424895 | 2136442 | -0.12722903 | 2992645 | 0.3885354   | experimental | ChemBridge | 5136871 |
| 1577 F05 | X | 1149  | 1160  | -0.2744313  | 945    | 960    | -0.86805857 | 2267206 | 0.29237773  | 3349643 | 1.35228419  | experimental | ChemBridge | 5107707 |
| 1577 F06 | X | 907   | 920   | -0.63338956 | 1827   | 1840   | -0.35608978 | 2312010 | 0.43614865  | 3236514 | 0.20226144  | experimental | ChemBridge | 5134764 |
| 1577 F07 | X | 870   | 880   | -0.68827216 | 1065   | 1080   | -0.70150791 | 1984736 | -0.61403627 | 2306744 | -1.46311197 | experimental | ChemBridge | 5107002 |
| 1577 F08 | X | 784   | 800   | -0.81583528 | 1223   | 1240   | -0.48221621 | 2387321 | 0.67781305  | 3219327 | 1.0004825   | experimental | ChemBridge | 5197007 |
| 1577 F09 | X | 1067  | 1080  | -0.39606178 | 1185   | 1200   | -0.53495725 | 2328167 | 0.48799462  | 3304180 | 1.2295503   | experimental | ChemBridge | 5181551 |
| 1577 F10 | X | 1070  | 1080  | -0.39161189 | 1069   | 1080   | -0.69595622 | 2348716 | 0.55393401  | 2882671 | 0.09165134  | experimental | ChemBridge | 5210096 |
| 1577 F11 | X | 1029  | 1040  | -0.45242713 | 906    | 920    | -0.92218753 | 2463713 | 0.92294626  | 3166015 | 0.85656227  | experimental | ChemBridge | 5185231 |
| 1577 F12 | X | 589   | 600   | -1.1050785  | 1108   | 1120   | -0.64182726 | 2454435 | 0.89317422  | 2898917 | 0.13550879  | experimental | ChemBridge | 5210670 |
| 1577 F13 | X | 823   | 840   | -0.75798664 | 1058   | 1080   | -0.71122336 | 2590486 | 1.32974635  | 3423347 | 1.55125163  | experimental | ChemBridge | 5186661 |
| 1577 F14 | X | 669   | 680   | -0.98641462 | 1226   | 1240   | -0.47805244 | 2225986 | 0.16010745  | 3183681 | 0.90425313  | experimental | ChemBridge | 5211664 |
| 1577 F15 | X | 1060  | 1080  | -0.40644487 | 1213   | 1240   | -0.49609543 | 2422061 | 0.78928975  | 3586258 | 1.99104356  | experimental | ChemBridge | 5190510 |
| 1577 F16 | X | 1019  | 1040  | -0.46726011 | 1180   | 1200   | -0.54189686 | 2516298 | 1.09168552  | 2798630 | -0.1352244  | experimental | ChemBridge | 5190772 |
| 1577 F17 | X | 1586  | 1600  | 0.37377018  | 1463   | 1480   | -0.14911489 | 2303752 | 0.40964967  | 2563765 | -0.76926219 | experimental | ChemBridge | 5133575 |
| 1577 F18 | X | 986   | 1000  | -0.51620897 | 1142   | 1160   | -0.5946379  | 2887237 | 2.28198644  | 3013077 | 0.4436933   | experimental | ChemBridge | 5191043 |
| 1577 F19 | X | 660   | 680   | -0.9997643  | 1296   | 1320   | -0.38089789 | 2174825 | -0.00462336 | 2886303 | 0.10145623  | experimental | ChemBridge | 5134027 |
| 1577 F20 | X | 1468  | 1480  | 0.19874095  | 1863   | 1880   | 0.40605398  | 2285295 | 0.35042326  | 2464874 | -1.03622675 | experimental | ChemBridge | 5191835 |
| 1577 F21 | X | 905   | 920   | -0.63635615 | 1496   | 1520   | -0.10331346 | 2179949 | 0.01237997  | 2823135 | 0.20008731  | experimental | ChemBridge | 5135063 |
| 1577 F22 | X | 1024  | 1040  | -0.45984362 | 1262   | 1280   | -0.42808724 | 2275360 | 0.31854298  | 2482980 | -0.98734809 | experimental | ChemBridge | 5193130 |
| 1577 F23 | N | 1941  | 2240  | 0.90034117  | 2042   | 2320   | 0.65449204  | 2191975 | 0.05097003  | 2716592 | -0.35669287 | empty        |            |         |
| 1577 F24 | P | 97239 | 97840 | 142.255729  | 89083  | 89760  | 121.460625  | 1990943 | -0.59411871 | 2408718 | -1.18782459 | empty        |            |         |
| 1577 G01 | X | 750   | 760   | -0.86626743 | 1029   | 1040   | -0.75147311 | 1875725 | -0.96384012 | 2553175 | -0.79785079 | experimental | ChemBridge | 5101739 |
| 1577 G02 | X | 1347  | 1360  | 0.01926182  | 1425   | 1440   | -0.20185593 | 1903647 | -0.87424161 | 2931070 | 0.22230851  | experimental | ChemBridge | 5108151 |
| 1577 G03 | X | 1186  | 1200  | -0.21954925 | 1303   | 1320   | -0.37118243 | 2067760 | -0.34762173 | 3014008 | 0.44620661  | experimental | ChemBridge | 5100336 |
| 1577 G04 | X | 908   | 920   | -0.63190626 | 1276   | 1280   | -0.42114783 | 2145314 | 0.89598483  | 3434928 | 1.55551967  | experimental | ChemBridge | 5108661 |
| 1577 G05 | X | 906   | 920   | -0.63487285 | 864    | 880    | -0.9804802  | 2104374 | -0.23013185 | 2795167 | -0.30307305 | experimental | ChemBridge | 5100517 |
| 1577 G06 | X | 1140  | 1160  | -0.28778099 | 1381   | 1400   | -0.2629245  | 2223921 | 0.1534811   | 2776272 | -0.19558169 | experimental | ChemBridge | 5109527 |
| 1577 G07 | X | 943   | 960   | -0.57999081 | 1061   | 1080   | -0.7070596  | 2260424 | 0.27061506  | 2932043 | 0.22493521  | experimental | ChemBridge | 5101006 |
| 1577 G08 | X | 2267  | 2280  | 1.38389651  | 2466   | 2480   | 1.24297104  | 2116602 | -0.19089332 | 2998297 | 0.40379344  | experimental | ChemBridge | 5110269 |
| 1577 G09 | X | 1545  | 1560  | 0.31295494  | 1663   | 1680   | 0.12846955  | 2140719 | -0.11350462 | 2729488 | -0.32187903 | experimental | ChemBridge | 510     |

|          |   |        |        |             |        |        |             |         |              |         |             |                   |            |         |
|----------|---|--------|--------|-------------|--------|--------|-------------|---------|--------------|---------|-------------|-------------------|------------|---------|
| 1577 H01 | X | 1070   | 1080   | -0.39161189 | 988    | 1000   | -0.80837791 | 2045936 | -0.41765245  | 3035905 | 0.5053194   | experimental      | ChemBridge | 5107345 |
| 1577 H02 | X | 1905   | 1920   | 0.84694242  | 1422   | 1440   | -0.2060197  | 2164242 | -0.038022    | 2630914 | -0.58798783 | experimental      | ChemBridge | 5135609 |
| 1577 H03 | X | 1421   | 1440   | 0.12902591  | 1942   | 1960   | 0.51569983  | 2120244 | -0.17920656  | 2876337 | 0.07455218  | experimental      | ChemBridge | 5105531 |
| 1577 H04 | X | 1065   | 1080   | -0.39902838 | 1261   | 1280   | -0.42947515 | 2372768 | 0.6311414    | 2839112 | -0.02583984 | experimental      | ChemBridge | 5136684 |
| 1498     | X | 1498   | 1520   | 2433999     | 2023   | 2040   | 0.62812152  | 2334068 | 0.506893025  | 3358971 | 1.3774767   | experimental      | ChemBridge | 5107840 |
| 1577 H06 | X | 4105   | 4120   | 4.11019929  | 2581   | 2600   | 1.40258209  | 2323687 | 0.47361881   | 3127030 | 0.75131899  | experimental      | ChemBridge | 5194880 |
| 1577 H07 | X | 1419   | 1440   | 0.12605932  | 1742   | 1760   | 0.2381154   | 2476571 | 0.96420612   | 2811763 | -0.09977076 | experimental      | ChemBridge | 5180197 |
| 1577 H08 | X | 1182   | 1200   | -0.22548245 | 981    | 1000   | -0.81809337 | 2054268 | -0.39091601  | 2776644 | -0.19457745 | experimental      | ChemBridge | 5202053 |
| 1577 H09 | X | 1060   | 1080   | -0.40644487 | 1498   | 1520   | -0.10053761 | 2527314 | 1.12703461   | 2814011 | -0.09370209 | experimental      | ChemBridge | 5181553 |
| 1577 H10 | X | 2949   | 2960   | 2.39550614  | 3347   | 3360   | 2.46573047  | 2372136 | 0.62908612   | 3208368 | 0.97089776  | experimental      | ChemBridge | 5210416 |
| 1577 H11 | X | 1021   | 1040   | -0.46429352 | 1060   | 1080   | -0.70844752 | 2368518 | 0.61747637   | 2966050 | 0.30216221  | experimental      | ChemBridge | 5185233 |
| 1577 H12 | X | 1028   | 1040   | -0.45391043 | 825    | 840    | -1.03746922 | 2634507 | 1.47100471   | 2717833 | 0.02046331  | experimental      | ChemBridge | 5210672 |
| 1577 H13 | X | 944    | 960    | -0.57850751 | 1383   | 1400   | -0.26014866 | 2198888 | 0.07315306   | 2952410 | 0.27991763  | experimental      | ChemBridge | 5187115 |
| 1577 H14 | X | 707    | 720    | -0.93004927 | 1186   | 1200   | -0.53356933 | 2365045 | 0.60633191   | 3197503 | 0.94156678  | experimental      | ChemBridge | 5211741 |
| 1577 H15 | X | 1617   | 1640   | 0.41975243  | 1167   | 1200   | -0.55993985 | 2415624 | 0.76863415   | 3214812 | 0.98829388  | experimental      | ChemBridge | 5190624 |
| 1577 H16 | X | 1059   | 1080   | -0.40792817 | 1742   | 1760   | 0.2381154   | 2301855 | 0.40356241   | 3012820 | 0.44299995  | experimental      | ChemBridge | 5190804 |
| 1577 H17 | X | 2461   | 2480   | 1.67165643  | 1890   | 1920   | 0.44352788  | 2206643 | 0.09803797   | 2761518 | -0.23541136 | experimental      | ChemBridge | 5133580 |
| 1577 H18 | X | 3103   | 3120   | 2.62393412  | 4063   | 4080   | 3.45948274  | 2113683 | -0.20026006  | 2500383 | -0.94036723 | experimental      | ChemBridge | 5191309 |
| 1577 H19 | X | 783    | 800    | -0.81731858 | 1056   | 1080   | -0.71399921 | 2237367 | 0.19662778   | 2717833 | -0.35334268 | experimental      | ChemBridge | 5134037 |
| 1577 H20 | X | 827    | 840    | -0.75205344 | 1144   | 1160   | -0.59186206 | 2140731 | -0.11346611  | 2975010 | 0.34092823  | experimental      | ChemBridge | 5192437 |
| 1577 H21 | X | 1611   | 1640   | 0.41085264  | 1885   | 1920   | 0.43658827  | 2226818 | 0.16277724   | 2660695 | -0.50759152 | experimental      | ChemBridge | 5132526 |
| 1577 H22 | X | 4501   | 4520   | 4.69758553  | 3899   | 3920   | 3.2318635   | 2139874 | -0.11621613  | 2737359 | -0.30063061 | W<br>experimental | ChemBridge | 5193138 |
| 1577 H23 | N | 1910   | 2240   | 0.85435892  | 1965   | 2400   | 0.54762204  | 2207611 | 0.10114417   | 2603336 | -0.66243695 | empty             |            |         |
| 1577 H24 | P | 104038 | 104760 | 152.340676  | 141192 | 141800 | 193.783861  | 2257084 | 0.25989782   | 2842603 | -0.01651559 | empty             |            |         |
| 1577 I01 | X | 706    | 720    | -0.93153257 | 1503   | 1520   | -0.093598   | 2069680 | -0.34345017  | 2585210 | -0.71136961 | experimental      | ChemBridge | 5101879 |
| 1577 I02 | X | 1160   | 1160   | -0.28778099 | 1779   | 1790   | 0.28945852  | 1869437 | -0.984306    | 2433113 | -1.12115937 | experimental      | ChemBridge | 5138141 |
| 1577 I03 | X | 2225   | 2240   | 3.215197    | 2022   | 2040   | 0.6267336   | 2388359 | 0.08114388   | 3192194 | 0.8737413   | experimental      | ChemBridge | 5100356 |
| 1577 I04 | X | 1424   | 1440   | 0.13347581  | 1424   | 1440   | -0.20324385 | 2800378 | 2.00326582   | 3369168 | 1.40499086  | experimental      | ChemBridge | 5108683 |
| 1577 I05 | X | 1345   | 1360   | 0.01629522  | 1061   | 1080   | -0.7070596  | 2551110 | 1.20339326   | 3002424 | 0.41493463  | experimental      | ChemBridge | 5100552 |
| 1577 I06 | X | 1055   | 1080   | -0.41386137 | 1459   | 1480   | -0.15466658 | 2524887 | 1.11924665   | 3431871 | 1.57426288  | experimental      | ChemBridge | 5109754 |
| 1577 I07 | X | 1106   | 1120   | -0.33821314 | 1505   | 1520   | -0.09082216 | 2442477 | 0.85480236   | 3345155 | 1.34016575  | experimental      | ChemBridge | 5101009 |
| 1577 I08 | X | 1307   | 1320   | -0.04007012 | 826    | 840    | -1.0332211  | 2697584 | 1.67341161   | 3357674 | 1.37396185  | experimental      | ChemBridge | 5110420 |
| 1577 I09 | X | 1147   | 1160   | -0.2773979  | 1547   | 1560   | -0.03252943 | 2488423 | 1.00223783   | 3203422 | 0.47701966  | experimental      | ChemBridge | 5101647 |
| 1577 I10 | X | 855    | 880    | -0.71052178 | 1013   | 1040   | -0.8916798  | 2795463 | 0.987651     | 2795463 | 1.07981929  | experimental      | ChemBridge | 5116167 |
| 1577 I11 | X | 1428   | 1440   | 0.139409    | 1784   | 1800   | 0.29640813  | 2402464 | 0.72640521   | 1951046 | -2.42334861 | experimental      | ChemBridge | 5102143 |
| 1577 I12 | X | 1026   | 1040   | -0.45687702 | 1465   | 1480   | -0.14633904 | 2153608 | -0.07214529  | 3094243 | 0.66280773  | experimental      | ChemBridge | 5117238 |
| 1577 I13 | X | 1588   | 1600   | 0.37673678  | 1503   | 1520   | -0.093598   | 2292463 | 0.37342456   | 2869457 | 0.05597904  | experimental      | ChemBridge | 5102355 |
| 1577 I14 | X | 1144   | 1160   | -0.28184779 | 1098   | 1120   | -0.65570648 | 2443742 | 0.8588616    | 3081294 | 0.62785082  | experimental      | ChemBridge | 5118551 |
| 1577 I15 | X | 1863   | 1880   | 0.78464388  | 3104   | 3120   | 2.12846538  | 2390142 | 0.68686532   | 3233558 | 1.03890028  | experimental      | ChemBridge | 5102527 |
| 1577 I16 | X | 1660   | 1680   | 0.48353427  | 1411   | 1440   | -0.22128684 | 2234149 | 0.18630159   | 3152300 | 0.81953748  | experimental      | ChemBridge | 5119129 |
| 1577 I17 | X | 1480   | 1480   | 0.06821067  | 1312   | 1320   | 0.15315313  | 2297371 | 1.35183953   | 3433154 | -0.50129126 | experimental      | ChemBridge | 5103843 |
| 1577 I18 | X | 1459   | 1480   | 0.18539126  | 1131   | 1160   | -0.60990505 | 2629535 | 4.5505013    | 3432336 | 1.57551819  | experimental      | ChemBridge | 5119195 |
| 1577 I19 | X | 867    | 880    | -0.6927215  | 1426   | 1440   | -0.20046801 | 2384466 | 0.66865168   | 2844727 | -0.01078167 | experimental      | ChemBridge | 5104092 |
| 1577 I20 | X | 1141   | 1160   | -0.28629769 | 1457   | 1480   | -0.15744242 | 2170020 | -0.01948106  | 2472406 | -1.01589349 | experimental      | ChemBridge | 5106496 |
| 1577 I21 | X | 3542   | 3560   | 3.2751022   | 4180   | 4200   | 3.62186963  | 1859302 | -1.01653966  | 2502143 | -0.93561596 | experimental      | ChemBridge | 5104603 |
| 1577 I22 | X | 1361   | 1400   | 0.0400028   | 1723   | 1760   | 0.21174487  | 1963672 | -0.68162824  | 2281095 | -1.5323536  | experimental      | ChemBridge | 5107328 |
| 1577 I23 | N | 1934   | 2320   | 0.88995808  | 1772   | 2040   | 2.97575306  | 2100533 | -0.24245691  | 2630203 | -0.58990723 | empty             |            |         |
| 1577 I24 | P | 126729 | 127360 | 185.992604  | 85373  | 86080  | 116.311434  | 2278411 | 0.32833329   | 2929656 | 1.70219199  | empty             |            |         |
| 1577 J01 | X | 2548   | 2560   | 8.00703441  | 2945   | 2960   | 9.0778576   | 2057796 | -0.370950176 | 2701304 | -0.79764411 | experimental      | ChemBridge | 5107372 |
| 1577 J02 | X | 1985   | 2000   | 0.96560631  | 2301   | 2320   | 0.10196388  | 1954450 | -0.71122058  | 2512550 | -0.90752139 | experimental      | ChemBridge | 5135615 |
| 1577 J03 | X | 1063   | 1080   | -0.40199498 | 1100   | 1120   | -0.65293063 | 2413356 | 0.7613564    | 3153910 | 0.82388381  | experimental      | ChemBridge | 5105734 |
| 1577 J04 | X | 783    | 800    | -0.81731858 | 1261   | 1280   | -0.42947516 | 2796471 | 1.9907287    | 3277821 | 1.15839196  | experimental      | ChemBridge | 5136983 |
| 1577 J05 | X | 1226   | 1240   | -0.16021731 | 1744   | 1760   | 0.24089124  | 2476953 | 0.96543191   | 3048049 | 0.53810315  | experimental      | ChemBridge | 5108050 |
| 1577 J06 | X | 1987   | 2000   | 0.96857291  | 1904   | 1920   | 0.46295879  | 2178990 | 0.09030265   | 2767161 | -0.2201776  | experimental      | ChemBridge | 5195052 |
| 1577 J07 | X | 946    | 960    | -0.57554091 | 1102   | 1120   | -0.65015479 | 2317927 | 0.45513563   | 2947106 | 0.26559904  | experimental      | ChemBridge | 5180306 |
| 1577 J08 | X | 908    | 920    | -0.63190626 | 822    | 840    | -1.03877299 | 2122906 | -0.17066451  | 2374540 | -1.27982102 | experimental      | ChemBridge | 5202180 |
| 1577 J09 | X | 1062   | 1080   | -0.40347828 | 1061   | 1080   | -0.7070596  | 2860143 | 2.19504489   | 2953277 | 0.28225817  | experimental      | ChemBridge | 5181956 |
| 1577 J10 | X | 3107   | 3120   | 2.62986731  | 2744   | 2760   | 1.6288134   | 2420056 | 0.78285593   | 3312766 | 1.25272893  | experimental      | ChemBridge | 5120498 |
| 1577 J11 | X | 1100   | 1120   | -0.34711293 | 1779   | 1800   | 0.28946852  | 2480514 | 0.97685875   | 3363109 | 1.38863408  | experimental      | ChemBridge | 5185406 |
| 1577 J12 | X | 908    | 920    | -0.63190626 | 1021   | 1040   | -0.76257648 | 2482547 | 0.98338242   | 3229500 | 1.02794537  | experimental      | ChemBridge | 5210947 |
| 1577 J13 | X | 986    | 1000   | -0.51620897 | 1743   | 1760   | 0.23950332  | 2257847 | 0.26234576   | 3491850 | 1.73618123  | experimental      | ChemBridge | 5187361 |
| 1577 J14 | X | 1184   | 1200   | -0.22251585 | 1616   | 1640   | 0.0632372   | 2519042 | 1.10049071   | 3334289 | 1.31083207  | experimental      | ChemBridge | 5211742 |
| 1577 J15 | X | 1381   | 1400   | 0.06969397  | 1854   | 1880   | 0.39356268  | 2377302 | 0.64566322   | 3166195 | 0.8570482   | experimental      | ChemBridge | 5190641 |
| 1577 J16 | X | 2424   | 2440   | 1.61677439  | 2780   | 2800   | 1.6787786   | 2016330 | -0.51265473  | 3428019 | 1.56386408  | experimental      | ChemBridge | 5190682 |
| 1577 J17 | X | 1381   | 1400   | 0.06969397  | 1615   | 1640   | 0.06184928  | 2213565 | 0.12024988   | 2950728 | 0.27537693  | experimental      | ChemBridge | 5133753 |
| 1577 J18 | X | 1786   | 1800   | 0.67042989  | 2104   | 2120   | 0.74054322  | 2165051 | -0.03542601  | 2903401 | 0.14761372  | experimental      | ChemBridge | 5191454 |
| 1577 J19 | X | 865    | 880    | -0.6956881  | 1063   | 1080   | -0.70428375 | 2092737 | -0.26747338  | 2860638 | 0.03217141  | experimental      | ChemBridge | 5134150 |
| 1577 J20 | X | 1225   | 1240   | -0.16170061 | 982    | 1000   | -0.81670545 | 2235090 | 0.18932115   | 2695392 | -0.41392405 | experimental      | ChemBridge | 5192544 |
| 1577 J21 | X | 1973   | 2000   | 0.94780673  | 1772   | 1800   | 0.27975306  | 2176931 | 0.00269555   | 2730970 | -0.31787825 | experimental      | ChemBridge | 5135290 |
| 1577 J22 | X | 3240   | 3260   | 2.79748005  | 2576   | 2600   | 1.39562248  | 2168813 | 0.02335418   | 3622746 | -0.5965191  | experimental      | ChemBridge | 5193139 |
| 1577 J23 | N | 1976   | 2320   | 0.95225662  | 2126   | 2440   | 0.7710775   | 2285573 | 0.48387955   | 2936669 | 0.01335801  | empty             |            |         |
| 1577 J24 | P | 110346 | 111000 | 161.697323  | 99466  | 100280 | 135.871421  | 2248916 | 0.2336872    | 2727173 | -0.32812857 | empty             |            |         |
| 1577 K01 | X | 1307   | 1320   | -0.04007012 | 1185   | 1200   | -0.53495725 | 2202074 | -0.49807355  | 2707359 | -0.38161813 | experimental      | ChemBridge | 5101886 |
| 1577 K02 | X | 425    | 440    | -1.34833947 | 502    | 520    | -1.48290809 | 1800817 | -1.20421135  | 2456256 | -1.05949177 | experimental      | ChemBridge | 5108194 |
| 1577 K03 | X | 907    | 920    | -0.63338956 | 1266   | 1280   | -0.42253555 | 2202562 | 0.08494251   | 29587   |             |                   |            |         |

|          |   |        |        |             |        |        |             |             |             |         |             |              |            |         |
|----------|---|--------|--------|-------------|--------|--------|-------------|-------------|-------------|---------|-------------|--------------|------------|---------|
| 1577 K19 | X | 1184   | 1200   | -0.22251585 | 1138   | 1160   | -0.60018959 | 2326570     | 0.48287003  | 3143659 | 0.79621037  | experimental | ChemBridge | 5104126 |
| 1577 K20 | X | 1106   | 1120   | -0.33821314 | 1784   | 1800   | 0.29640813  | 2667331     | 1.57633318  | 2981495 | 0.35843503  | experimental | ChemBridge | 5106567 |
| 1577 K21 | X | 1418   | 1440   | 0.12457602  | 1689   | 1720   | 0.16455552  | 2505024     | 1.05550855  | 2699435 | -0.40300963 | experimental | ChemBridge | 5104902 |
| 1577 K22 | X | 1250   | 1280   | -0.11423505 | 2093   | 2120   | 0.72527608  | 2448678     | 0.87470066  | 2830351 | -0.22036275 | experimental | ChemBridge | 5107330 |
| 1577 K23 | N | 1824   | 2120   | 0.02679524  | 2943   | 3520   | 1.90500991  | 2014091     | -0.5198394  | emty    |             |              |            |         |
| 1577 K24 | P | 95536  | 96240  | 139.729672  | 192047 | 192560 | 264.366643  | 2365846     | 0.60890223  | 3283586 | 1.17395507  | empty        |            |         |
| 1577 L01 | X | 1470   | 1480   | 0.20170754  | 1709   | 1720   | 0.19231396  | 1735432     | -1.41402435 | 2312822 | -1.4467039  | experimental | ChemBridge | 5107442 |
| 1577 L02 | X | 789    | 800    | -0.80841879 | 1507   | 1520   | -0.08804631 | 1940282     | -0.75668409 | 2707701 | -0.38069487 | experimental | ChemBridge | 5135916 |
| 1577 L03 | X | 789    | 800    | -0.80841879 | 903    | 920    | -0.9263513  | 2085453     | -0.29084691 | 2298663 | -1.48492731 | experimental | ChemBridge | 5105867 |
| 1577 L04 | X | 1065   | 1080   | -0.39902838 | 1504   | 1520   | -0.09221008 | 2084160     | -0.294996   | 2953791 | 0.28364576  | experimental | ChemBridge | 5137141 |
| 1577 L05 | X | 669    | 680    | -0.98641462 | 1026   | 1040   | -0.75656887 | 2334489     | 0.50828119  | 2944286 | 0.25798621  | experimental | ChemBridge | 5108057 |
| 1577 L06 | X | 1109   | 1120   | -0.33736324 | 946    | 960    | -0.86667065 | 2129303     | -0.15013726 | 3019115 | 0.43823474  | experimental | ChemBridge | 5195108 |
| 1577 L07 | X | 907    | 920    | -0.63389556 | 1185   | 1200   | -0.53495725 | 2386271     | 0.67444372  | 2757181 | -0.24711945 | experimental | ChemBridge | 5180456 |
| 1577 L08 | X | 1229   | 1240   | -0.15576741 | 1622   | 1640   | 0.07156474  | 2303435     | 0.40863245  | 3231003 | 1.03200284  | experimental | ChemBridge | 5205154 |
| 1577 L09 | X | 783    | 800    | -0.81731858 | 1057   | 1080   | -0.71261129 | 2248575     | 0.23259297  | 3001280 | 0.4118463   | experimental | ChemBridge | 5181966 |
| 1577 L10 | X | 1301   | 1320   | -0.04896992 | 1939   | 1960   | 0.51153606  | 2253649     | 0.24887486  | 3034442 | 0.50136991  | experimental | ChemBridge | 5210529 |
| 1577 L11 | X | 3507   | 3520   | 3.22318675  | 3583   | 3600   | 2.7932801   | 2193913     | 0.05718885  | 3007578 | 0.42884828  | experimental | ChemBridge | 5185407 |
| 1577 L12 | X | 782    | 800    | -0.81880188 | 1300   | 1320   | -0.3753462  | 2163532     | -0.04030031 | 2915746 | 0.18094009  | experimental | ChemBridge | 5211063 |
| 1577 L13 | X | 908    | 920    | -0.63190626 | 904    | 920    | -0.92496338 | 2422610     | 0.79426031  | 3349715 | 1.35247586  | experimental | ChemBridge | 5189175 |
| 1577 L14 | X | 787    | 800    | -0.81138538 | 1179   | 1200   | -0.54328478 | 2383086     | 0.66422342  | 3110697 | 0.70722669  | experimental | ChemBridge | 5211778 |
| 1577 L15 | X | 1148   | 1160   | -0.2759146  | 1784   | 1800   | 0.29640813  | 2422695     | 0.79132418  | 2801149 | -0.12842414 | experimental | ChemBridge | 5190648 |
| 1577 L16 | X | 1147   | 1160   | -0.2773979  | 1181   | 1200   | -0.54050894 | 2218465     | 0.13597342  | 2858235 | 0.02568431  | experimental | ChemBridge | 5190888 |
| 1577 L17 | X | 983    | 1000   | -0.52065886 | 1020   | 1040   | -0.76396441 | 2513113     | 1.08146522  | 2851911 | 0.00861214  | experimental | ChemBridge | 5193757 |
| 1577 L18 | X | 1583   | 1600   | 0.36932028  | 1778   | 1800   | 0.28808059  | 2160923     | -0.04867229 | 2792166 | -0.15267451 | experimental | ChemBridge | 5191582 |
| 1577 L19 | X | 2225   | 2240   | 1.32159797  | 2943   | 2960   | 1.90500991  | 2228572     | 0.16840563  | 2876461 | 0.07488693  | experimental | ChemBridge | 5134249 |
| 1577 L20 | X | 908    | 960    | -0.2874073  | 1164   | 1180   | -0.10765071 | 2086275     | -0.28881092 | 2838195 | -0.40320368 | experimental | ChemBridge | 5192683 |
| 1577 L21 | X | 3104   | 3120   | 2.62541747  | 4940   | 4960   | 4.67669047  | 2220716     | 0.09589662  | 2813318 | -0.09557291 | experimental | ChemBridge | 5135308 |
| 1577 L22 | X | 1017   | 1040   | -0.47022671 | 1410   | 1440   | -0.22267476 | 2135946     | -0.12882063 | 2964189 | 0.31171603  | experimental | ChemBridge | 5193159 |
| 1577 L23 | N | 2007   | 2400   | 0.99823888  | 1926   | 2160   | 0.49349307  | 2036225     | -0.44881394 | 2733853 | -0.31009535 | empty        |            |         |
| 1577 L24 | P | 129554 | 130080 | 190.188523  | 72476  | 73360  | 98.4114016  | 1712555     | -0.01134653 | 2623918 | -0.60687412 | empty        |            |         |
| 1577 M01 | X | 1266   | 1280   | -0.10088537 | 977    | 1000   | -0.82364506 | 1757048     | -1.28690113 | 2463183 | -1.04079175 | experimental | ChemBridge | 5103518 |
| 1577 M02 | X | 1028   | 1040   | -0.45391043 | 1465   | 1480   | -0.14633904 | 2090276     | -0.27537045 | 2640277 | -0.56271162 | experimental | ChemBridge | 5108251 |
| 1577 M03 | X | 1148   | 1160   | -0.2759146  | 1466   | 1480   | -0.14495112 | 2096002     | -0.25699637 | 2671603 | -0.47614445 | experimental | ChemBridge | 5100429 |
| 1577 M04 | X | 1464   | 1480   | -0.19429105 | 1261   | 1280   | -0.19429105 | 2299832     | 0.07947024  | 2832912 | 0.00949494  | experimental | ChemBridge | 5105974 |
| 1577 M05 | X | 1026   | 1040   | -0.45687702 | 983    | 1000   | -0.81531753 | 2024417     | -0.48670447 | 2757137 | -0.24723823 | experimental | ChemBridge | 5100597 |
| 1577 M06 | X | 788    | 800    | -0.80990209 | 1349   | 1360   | -0.30733801 | 2100859     | -0.24141081 | 2831938 | -0.04530665 | experimental | ChemBridge | 5110005 |
| 1577 M07 | X | 1189   | 1200   | -0.21509936 | 745    | 760    | -1.145643   | 2206349     | 0.09709456  | 2659331 | -0.41246897 | experimental | ChemBridge | 5101117 |
| 1577 M08 | X | 1223   | 1240   | -0.1646672  | 1021   | 1040   | -0.76257648 | 2369521     | 0.62069488  | 3003637 | 0.41820922  | experimental | ChemBridge | 5110579 |
| 1577 M09 | X | 2549   | 2560   | 1.80218671  | 2867   | 2880   | 1.79952783  | 2038030     | -0.4430219  | 2849864 | 0.00308609  | experimental | ChemBridge | 5101816 |
| 1577 M10 | X | 984    | 1000   | -0.51917556 | 1260   | 1280   | -0.43086309 | 2026182     | -0.48104078 | 2914739 | 0.1782216   | experimental | ChemBridge | 5116891 |
| 1577 M11 | X | 850    | 860    | -0.30134569 | 1197   | 1200   | -0.69467885 | 1961037     | -0.69008365 | 2802021 | 0.44403943  | experimental | ChemBridge | 5102151 |
| 1577 M12 | X | 901    | 920    | -0.6428935  | 1057   | 1080   | -0.71261129 | 2498837     | -0.72932306 | 2867789 | 0.05147613  | experimental | ChemBridge | 5117427 |
| 1577 M13 | X | 1426   | 1440   | 0.13644241  | 1102   | 1120   | -0.65015479 | 2222747     | 0.14971387  | 2740082 | -0.29327964 | experimental | ChemBridge | 5102369 |
| 1577 M14 | X | 627    | 640    | -1.04871316 | 1145   | 1160   | -0.59047414 | 1997590     | -0.57278925 | 3200599 | 0.94992469  | experimental | ChemBridge | 5118682 |
| 1577 M15 | X | 1267   | 1280   | -0.0940207  | 1502   | 1520   | -0.09498592 | 2169185     | -0.02216048 | 3179913 | 0.89408109  | experimental | ChemBridge | 5102990 |
| 1577 M16 | X | 1464   | 1480   | 0.19280775  | 1741   | 1760   | 0.23672747  | 2310403     | 0.43099197  | 2723470 | -0.33812513 | experimental | ChemBridge | 5119047 |
| 1577 M17 | X | 2066   | 2080   | 1.0857535   | 2742   | 2760   | 1.62603756  | 2260868     | 0.27203981  | 2558647 | -0.78307866 | experimental | ChemBridge | 5103859 |
| 1577 M18 | X | 1464   | 1480   | 0.18835786  | 1939   | 1960   | 0.51152606  | 2433748     | 0.628792    | 2833147 | -0.04320368 | experimental | ChemBridge | 5119227 |
| 1577 M19 | X | 1400   | 1400   | 0.07414387  | 1379   | 1360   | -0.146239   | -0.09589045 |             | 1384719 | 0.40080077  | experimental | ChemBridge | 5104894 |
| 1577 M20 | X | 984    | 1000   | -0.51917556 | 1422   | 1440   | -0.2060197  | 2286784     | 0.35520129  | 3286863 | 1.1828016   | experimental | ChemBridge | 5106594 |
| 1577 M21 | X | 2143   | 2160   | 1.1996749   | 1936   | 1960   | 0.5073723   | 2118615     | -0.18443383 | 2596916 | -0.67976828 | experimental | ChemBridge | 5105095 |
| 1577 M22 | X | 981    | 1000   | -0.52362546 | 1259   | 1280   | -0.43225101 | 2339685     | 0.52495456  | 2870207 | 0.05800373  | experimental | ChemBridge | 5105769 |
| 1577 M23 | N | 2103   | 2360   | 1.14063554  | 2223   | 2560   | 0.90570596  | 1829478     | -1.11224147 | 2784234 | -0.17408761 | empty        |            |         |
| 1577 M24 | P | 82366  | 83040  | 120.194629  | 110073 | 110640 | 150.593111  | 2070973     | -0.33731153 | 2776870 | -0.19396734 | empty        |            |         |
| 1577 N01 | X | 2429   | 2440   | 1.62419088  | 4669   | 4680   | 4.30056357  | 1768115     | -1.30914833 | 2864436 | 0.04242443  | experimental | ChemBridge | 5107549 |
| 1577 N02 | X | 1024   | 1040   | -0.45984362 | 1174   | 1200   | -0.55022439 | 1872507     | -0.97416632 | 2632019 | -0.58500479 | experimental | ChemBridge | 5136037 |
| 1577 N03 | X | 744    | 760    | -0.87516722 | 1182   | 1200   | -0.53912102 | 2232920     | 0.18235786  | 3114770 | 0.71822209  | experimental | ChemBridge | 5105919 |
| 1577 N04 | X | 1865   | 1880   | 0.78761048  | 2543   | 2560   | 1.34984105  | 1871509     | -0.97736879 | 2668486 | -0.48655906 | experimental | ChemBridge | 5137235 |
| 1577 N05 | X | 1864   | 1880   | 0.78612718  | 2183   | 2200   | 0.85018907  | 2742662     | 1.81067177  | 3130182 | 0.75982808  | experimental | ChemBridge | 5108063 |
| 1577 N06 | X | 866    | 880    | -0.6942048  | 1141   | 1160   | -0.59602582 | 1823458     | -1.13155896 | 2808221 | -0.10933269 | experimental | ChemBridge | 5195154 |
| 1577 N07 | X | 948    | 960    | -0.57257431 | 1666   | 1680   | 0.13263331  | 2269684     | 0.30032934  | 2928111 | 0.21432044  | experimental | ChemBridge | 5180510 |
| 1577 N08 | X | 708    | 720    | -0.92856597 | 1345   | 1360   | -0.3128897  | 2123418     | -0.16902156 | 2863355 | 0.03950618  | experimental | ChemBridge | 5209028 |
| 1577 N09 | X | 906    | 920    | -0.63487285 | 1061   | 1080   | -0.7070596  | 2121145     | -0.17631535 | 3350351 | 1.84065783  | experimental | ChemBridge | 5182258 |
| 1577 N10 | X | 788    | 800    | -0.80990209 | 1302   | 1320   | -0.37257036 | 2185508     | 0.03021817  | 2871650 | 0.06189923  | experimental | ChemBridge | 5210645 |
| 1577 N11 | X | 1382   | 1400   | 0.07117727  | 2017   | 2040   | 0.61979399  | 2056282     | -0.38445332 | 2375912 | -1.27638715 | experimental | ChemBridge | 5185661 |
| 1577 N12 | X | 3498   | 3520   | 3.20983706  | 4695   | 4720   | 4.33664954  | 1849088     | -1.04931522 | 2304108 | -1.47022808 | experimental | ChemBridge | 5211302 |
| 1577 N13 | X | 2339   | 2360   | 1.49069401  | 3016   | 3040   | 2.00632823  | 2285380     | 0.35069602  | 2701084 | -0.39855802 | experimental | ChemBridge | 5190249 |
| 1577 N14 | X | 783    | 800    | -0.81731858 | 1218   | 1240   | -0.48915588 | 1995712     | -0.57881553 | 2472278 | -1.01623903 | experimental | ChemBridge | 5211789 |
| 1577 N15 | X | 1344   | 1360   | 0.01481192  | 1583   | 1600   | 0.01743577  | 2275191     | 0.31800068  | 2875787 | 0.07306741  | experimental | ChemBridge | 5190650 |
| 1577 N16 | X | 1137   | 1160   | -0.29223088 | 1018   | 1040   | -0.7674025  | 2098635     | -0.2464737  | 2703147 | -0.31645367 | experimental | ChemBridge | 5190907 |
| 1577 N17 | X | 902    | 920    | -0.64080605 | 1459   | 1480   | -0.1546688  | 1169643     | -0.02069081 | 3082553 | 0.06124959  | experimental | ChemBridge | 5133767 |
| 1577 N18 | X | 1547   | 1560   | 0.31592153  | 1613   | 1640   | -0.14911489 | 2032291     | -0.4614377  | 2830292 | -0.04975017 | experimental | ChemBridge | 5191662 |
| 1577 N19 | X | 944    | 960    | -0.57850751 | 1022   | 1040   | -0.76118856 | 2005377     | -0.54780165 | 2860623 | 0.03213092  | experimental | ChemBridge | 5134275 |
| 1577 N20 | X | 1028   | 1040   | -0.45391043 | 1345   | 1360   | -0.3128897  | 1988140     | -0.60311322 | 2801276 | -0.12800813 | experimental | ChemBridge | 5192890 |
| 1577 N21 | X | 623    | 640    | -1.05464635 | 703    | 720    | -1.20393573 | 1260830     | -2.936698   | 1587109 | -3.40582711 | experimental | ChemBridge | 5135304 |

|          |   |  |         |        |             |        |        |             |         |             |         |             |              |            |         |
|----------|---|--|---------|--------|-------------|--------|--------|-------------|---------|-------------|---------|-------------|--------------|------------|---------|
| 1577 O13 | X |  | 1410    | 1440   | 0.11270963  | 1011   | 1040   | -0.7764557  | 1909145 | -0.85659916 | 2488167 | -0.97334534 | experimental | ChemBridge | 5102373 |
| 1577 O14 | X |  | 1378    | 1400   | 0.06524407  | 1858   | 1880   | 0.39911437  | 2105269 | -0.22725963 | 2827961 | -0.0560429  | experimental | ChemBridge | 5118843 |
| 1577 O15 | X |  | 2258    | 2280   | 1.37054682  | 1938   | 1960   | 0.51014814  | 2073933 | -0.32781327 | 2823947 | -0.06687903 | experimental | ChemBridge | 5103022 |
| 1577 O16 | X |  | 4142    | 4160   | 4.16508134  | 2701   | 2720   | 1.36913275  | 2132695 | -0.13925272 | 2703418 | -0.39257719 | experimental | ChemBridge | 5110448 |
| 1577 O17 | X |  | 2058    | 1480   | 0.18390796  | 2059   | 2110   | 0.67808672  | 2111120 | -0.20844670 | 2759911 | -0.23974959 | experimental | ChemBridge | 5103884 |
| 1577 O18 | X |  | 1061    | 1080   | -0.40496157 | 1255   | 1280   | -0.4378027  | 2092470 | -0.26833016 | 2831903 | -0.04540114 | experimental | ChemBridge | 5119299 |
| 1577 O19 | X |  | 1666    | 1680   | 0.49243406  | 2024   | 2040   | 0.62950945  | 1640108 | -1.71990818 | 2414681 | -1.17172697 | experimental | ChemBridge | 5104162 |
| 1577 O20 | X |  | 1500    | 1520   | 0.2462065   | 1980   | 2000   | 0.56844087  | 2250645 | 0.23923537  | 3048040 | 1.51090094  | experimental | ChemBridge | 5106649 |
| 1577 O21 | X |  | 1340    | 1360   | 0.00887873  | 1058   | 1080   | -0.71122336 | 1830964 | -1.10747306 | 2414740 | -1.1715677  | experimental | ChemBridge | 5105175 |
| 1577 O22 | X |  | 940     | 960    | -0.5844407  | 1342   | 1360   | -0.31705347 | 1957015 | -0.70298979 | 2779583 | -0.18664337 | experimental | ChemBridge | 5105809 |
| 1577 O23 | N |  | 2394    | 2640   | 1.43877856  | 2123   | 2480   | 0.76691374  | 1948795 | -0.72936683 | 2450027 | -1.07630748 | empty        |            |         |
| 1577 O24 | P |  | 1100318 | 110040 | 160.152492  | 115897 | 116560 | 158.672206  | 1831567 | -1.1055381  | 2670495 | -0.48221543 | empty        |            |         |
| 1577 P01 | X |  | 1311    | 1320   | -0.03413693 | 1630   | 1640   | 0.08266811  | 1682100 | -1.58516065 | 2512674 | -0.90718664 | experimental | ChemBridge | 5107573 |
| 1577 P02 | X |  | 1749    | 1760   | 0.61554785  | 1947   | 1960   | 0.52263944  | 1818234 | -1.14832218 | 2494201 | -0.95705605 | experimental | ChemBridge | 5136276 |
| 1577 P03 | X |  | 1067    | 1080   | -0.39606178 | 1147   | 1160   | -0.58769829 | 1958698 | -0.69758924 | 2642073 | -0.55786317 | experimental | ChemBridge | 5105953 |
| 1577 P04 | X |  | 1351    | 1360   | 0.02519501  | 1549   | 1560   | -0.02975358 | 1960572 | -0.69157578 | 2547028 | -0.81444513 | experimental | ChemBridge | 5137278 |
| 1577 P05 | X |  | 1108    | 1120   | -0.33524654 | 1389   | 1400   | -0.25182113 | 1929176 | -0.79232196 | 2399767 | -1.21198857 | experimental | ChemBridge | 5108099 |
| 1577 P06 | X |  | 950     | 960    | -0.58960772 | 1388   | 1400   | -0.25320905 | 1842846 | -1.06934508 | 2473766 | -1.01222205 | experimental | ChemBridge | 5195235 |
| 1577 P07 | X |  | 1264    | 1280   | -0.10385196 | 1584   | 1600   | 0.01882369  | 1994083 | -0.58404281 | 2699418 | -0.40203552 | experimental | ChemBridge | 5180519 |
| 1577 P08 | X |  | 3310    | 3320   | 2.93097693  | 2708   | 2720   | 1.57884821  | 2074344 | -0.32649442 | 2521959 | -0.882121   | experimental | ChemBridge | 5209067 |
| 1577 P09 | X |  | 945     | 960    | -0.57702421 | 1143   | 1160   | -0.59324998 | 1857098 | -1.02361204 | 2549082 | -0.80890018 | experimental | ChemBridge | 5182716 |
| 1577 P10 | X |  | 951     | 960    | -0.56812442 | 1946   | 1960   | 0.52125152  | 1743059 | -1.38955018 | 2580834 | -0.91971271 | experimental | ChemBridge | 5210648 |
| 1577 P11 | X |  | 1632    | 1640   | 0.44200191  | 1747   | 1760   | 0.24505501  | 1852904 | -1.03707011 | 2328864 | -1.40339718 | experimental | ChemBridge | 5185936 |
| 1577 P12 | X |  | 896     | 920    | -0.64970584 | 1460   | 1480   | -0.15327858 | 1914118 | -0.80466137 | 2468346 | -1.0268538  | experimental | ChemBridge | 5211309 |
| 1577 P13 | X |  | 3504    | 3520   | 3.21873685  | 2743   | 2760   | 1.62742548  | 2085261 | -0.29146301 | 2575277 | -0.73818458 | experimental | ChemBridge | 5190260 |
| 1577 P14 | X |  | 3143    | 3160   | 3.68324666  | 2382   | 2400   | 3.51443077  | 1892052 | -0.91144886 | 2393940 | -0.22878022 | experimental | ChemBridge | 5214820 |
| 1577 P15 | X |  | 781     | 800    | -0.82028518 | 1541   | 1560   | -0.04085666 | 2001392 | -0.56058906 | 2419391 | -0.90919193 | experimental | ChemBridge | 5190576 |
| 1577 P16 | X |  | 1222    | 1240   | -0.16615005 | 1343   | 1360   | -0.31566555 | 1992886 | -0.58788385 | 2346656 | -1.35536618 | experimental | ChemBridge | 5190925 |
| 1577 P17 | X |  | 1387    | 1400   | 0.07859376  | 1741   | 1760   | 0.23672747  | 2230489 | 0.17455706  | 2514031 | -0.9035233  | experimental | ChemBridge | 5133772 |
| 1577 P18 | X |  | 1789    | 1800   | 0.67487979  | 3028   | 3040   | 2.0229833   | 1992850 | -0.5879937  | 2353355 | -1.33728166 | experimental | ChemBridge | 5191712 |
| 1577 P19 | X |  | 1182    | 1200   | -0.22548245 | 1098   | 1120   | -0.65570648 | 1800530 | -1.2051323  | 3127892 | 0.75364603  | experimental | ChemBridge | 5134306 |
| 1577 P20 | X |  | 2821    | 2840   | 2.20564392  | 2541   | 2560   | 1.3470652   | 1973107 | -0.6513524  | 2467053 | -1.03034436 | experimental | ChemBridge | 5192933 |
| 1577 P21 | X |  | 3903    | 3920   | 3.81057298  | 3546   | 3560   | 2.74192698  | 1809262 | -1.1771123  | 2708334 | -0.37898603 | experimental | ChemBridge | 5135308 |
| 1577 P22 | X |  | 17398   | 17400  | 0.53989962  | 2588   | 2600   | 0.01048739  | 1990147 | -0.59667785 | 2097472 | -1.34070742 | experimental | ChemBridge | 5154475 |
| 1577 P23 | N |  | 2404    | 2840   | 1.58710841  | 2517   | 2840   | 1.31375507  | 1861389 | -1.00984271 | 2339902 | -1.3843975  | empty        |            |         |
| 1577 P24 | P |  | 145833  | 146160 | 214.33514   | 107414 | 107760 | 146.902626  | 1679307 | -1.59412307 | 2007908 | -2.27203152 | empty        |            |         |
| 1578 A01 | X |  | 6990    | 7000   | 5.95980529  | 4034   | 4040   | 3.09805005  | 2989813 | 0.87593958  | 2185381 | -1.00279979 | experimental | ChemBridge | 5193621 |
| 1578 A02 | X |  | 1890    | 1920   | 0.07349691  | 1019   | 1040   | -0.80666    | 2641761 | 0.06096735  | 2128856 | -1.12332348 | experimental | ChemBridge | 5119314 |
| 1578 A03 | X |  | 1910    | 1920   | 0.09658047  | 1352   | 1360   | -0.37539351 | 2311375 | -0.71263951 | 2161651 | -1.05339735 | experimental | ChemBridge | 5110918 |
| 1578 A04 | X |  | 1223    | 1240   | -0.69639899 | 1306   | 1320   | -0.43496786 | 2537063 | -0.18418556 | 2015883 | -1.36420669 | experimental | ChemBridge | 5119773 |
| 1578 A05 | X |  | 1609    | 1620   | -0.37852777 | 1946   | 1960   | -0.34389244 | 2040358 | -1.34737241 | 2494542 | -0.94054212 | experimental | ChemBridge | 5113646 |
| 1578 A06 | X |  | 1505    | 1520   | 0.08083657  | 1228   | 1240   | -0.53598524 | 1554125 | -2.48575882 | 1381771 | -2.71627249 | experimental | ChemBridge | 5122776 |
| 1578 A07 | X |  | 2465    | 2480   | 0.73714932  | 1191   | 1200   | -0.58390374 | 2348061 | -0.62673835 | 1841365 | -1.73631732 | experimental | ChemBridge | 5115013 |
| 1578 A08 | X |  | 1864    | 1880   | 0.04348828  | 908    | 920    | -0.95041549 | 2721788 | 0.24835252  | 2106377 | -1.17048604 | experimental | ChemBridge | 5128689 |
| 1578 A09 | X |  | 1937    | 1960   | 0.12774328  | 1626   | 1640   | -0.02053761 | 2280260 | -0.78549604 | 1844308 | -1.7300422  | experimental | ChemBridge | 5115670 |
| 1578 A10 | X |  | 1986    | 2000   | 0.18429801  | 1668   | 1680   | 0.03385636  | 2347863 | -0.62720197 | 2125352 | -1.13079478 | experimental | ChemBridge | 5130634 |
| 1578 A11 | X |  | 1417    | 1440   | -0.47429294 | 1257   | 1280   | -0.49842745 | 2353281 | -0.61451559 | 2205314 | -0.96029826 | experimental | ChemBridge | 5116050 |
| 1578 A12 | X |  | 2760    | 2780   | 2.0545460   | 4027   | 4040   | 3.08898439  | 2181302 | -1.01770086 | 2231448 | -1.00112834 | experimental | ChemBridge | 5154775 |
| 1578 A13 | X |  | 2480    | 2490   | 0.63904448  | 1062   | 1080   | -0.75097093 | 1920486 | -1.92082678 | 2312488 | -0.90448956 | experimental | ChemBridge | 5211822 |
| 1578 A14 | X |  | 2258    | 2280   | 0.49823445  | 1150   | 1160   | -0.63700261 | 3514975 | 2.10561919  | 2197851 | -0.97621102 | experimental | ChemBridge | 5155825 |
| 1578 A15 | X |  | 3057    | 3080   | 1.42042277  | 1387   | 1400   | -0.33006521 | 3452333 | 1.95894142  | 2677537 | 0.0465847   | experimental | ChemBridge | 5212413 |
| 1578 A16 | X |  | 3100    | 3120   | 1.47005243  | 2031   | 2040   | 0.50397568  | 3771316 | 2.70584788  | 2446816 | -0.50932963 | experimental | ChemBridge | 5156745 |
| 1578 A17 | X |  | 2458    | 2480   | 0.72907008  | 1226   | 1240   | -0.53857543 | 2842751 | 0.53159033  | 2428713 | -0.48396262 | experimental | ChemBridge | 5213176 |
| 1578 A18 | X |  | 2263    | 2280   | 0.50400534  | 1629   | 1640   | -0.01665233 | 2512604 | -0.24145695 | 2760105 | 0.22263778  | experimental | ChemBridge | 5160525 |
| 1578 A19 | X |  | 1740    | 1760   | -0.09962981 | 1384   | 1400   | -0.33395049 | 2277518 | -0.79191661 | 2500730 | -0.33040658 | experimental | ChemBridge | 5213788 |
| 1578 A20 | X |  | 3137    | 3160   | 1.51275702  | 2580   | 2600   | 1.21498259  | 1716063 | -2.10657705 | 2097472 | -1.19024105 | experimental | ChemBridge | 5162465 |
| 1578 A21 | X |  | 4378    | 4400   | 2.94509205  | 3983   | 4000   | 3.03200023  | 2065483 | -1.28840161 | 2253718 | -0.85709032 | experimental | ChemBridge | 5214530 |
| 1578 A22 | X |  | 2218    | 2240   | 0.45206733  | 1732   | 1760   | 0.11674241  | 2334208 | -0.65917548 | 2031320 | -1.33129162 | experimental | ChemBridge | 5137326 |
| 1578 A23 | N |  | 1736    | 1760   | -0.10424652 | 3376   | 3960   | 2.24587784  | 2035302 | -1.35907116 | 2034724 | -1.32403354 | empty        |            |         |
| 1578 A24 | P |  | 2514    | 2960   | 0.79370405  | 197439 | 197800 | 253.57581   | 2007156 | -1.4249757  | 1719691 | -1.99575297 | empty        |            |         |
| 1578 B01 | X |  | 1360    | 1400   | -0.53821749 | 1124   | 1160   | -0.67067507 | 2235093 | -0.89125567 | 2245356 | -0.87491994 | experimental | ChemBridge | 5140335 |
| 1578 B02 | X |  | 1386    | 1400   | -0.50820886 | 1708   | 1720   | 0.08566014  | 2479576 | -0.31879277 | 2224835 | -0.91867521 | experimental | ChemBridge | 5261006 |
| 1578 B03 | X |  | 258     | 280    | -1.81012177 | 264    | 280    | -1.78445638 | 2092215 | -1.22580798 | 2029970 | -1.33417011 | experimental | ChemBridge | 5140994 |
| 1578 B04 | X |  | 2505    | 2520   | 0.78331645  | 1425   | 1440   | -0.28085161 | 2026081 | -1.38066235 | 1876637 | -1.66110969 | experimental | ChemBridge | 5261526 |
| 1578 B05 | X |  | 2262    | 2280   | 0.50285117  | 2424   | 2440   | 1.01294784  | 2675334 | 0.13957935  | 2467100 | -0.40211312 | experimental | ChemBridge | 5142859 |
| 1578 B06 | X |  | 1141    | 1160   | -0.7909825  | 1063   | 1080   | -0.74967584 | 2418036 | -0.46289018 | 2596997 | -0.13857722 | experimental | ChemBridge | 5262476 |
| 1578 B07 | X |  | 1608    | 1640   | -0.25198132 | 1102   | 1120   | -0.69916715 | 2861301 | 0.57502561  | 2728198 | 0.15460506  | experimental | ChemBridge | 5144179 |
| 1578 B08 | X |  | 1134    | 1160   | -0.79906175 | 1185   | 1200   | -0.5916743  | 2633007 | 0.04046965  | 2562451 | -0.19880388 | experimental | ChemBridge | 5163227 |
| 1578 B09 | X |  | 4103    | 4120   | 2.62769307  | 2144   | 2160   | 0.65032136  | 2343283 | -0.63792615 | 2046736 | -1.29842133 | experimental | ChemBridge | 5214970 |
| 1578 B10 | X |  | 4059    | 4080   | -0.28690427 | 1257   | 1280   | -0.49396947 | 2184038 | -1.01770086 | 2453700 | -0.43060486 | experimental | ChemBridge | 5169061 |
| 1578 B11 | X |  | 3259    | 3280   | 0.65356675  | 2263   | 2280   | 0.80443765  | 2252484 | -0.75887324 | 2312488 | -0.89914654 | experimental | ChemBridge | 5215962 |
| 1578 B12 | X |  | 2893    | 2920   | 1.23113756  | 2213   | 2240   | 0.73968289  | 2550891 | -0.15180866 | 2544742 | -0.23656335 | experimental | ChemBridge | 5169134 |
| 1578 B13 | X |  | 1774    | 1800   | -0.06038775 | 1144   | 1160   | -0.64477318 | 2688307 | 0.16995595  | 25157   |             |              |            |         |

|          |   |        |        |            |             |        |            |              |             |             |             |             |              |            |         |
|----------|---|--------|--------|------------|-------------|--------|------------|--------------|-------------|-------------|-------------|-------------|--------------|------------|---------|
| 1578 C07 | X |        | 6184   | 6200       | 5.02953773  | 2588   | 2600       | 1.22534334   | 3195894     | 1.35848326  | 2519987     | -0.28934644 | experimental | ChemBridge | 5115325 |
| 1578 C08 | X |        | 1292   | 1320       | -0.6167016  | 981    | 1000       | -0.85587359  | 3259310     | 1.50697337  | 2687834     | 0.06854016  | experimental | ChemBridge | 5129945 |
| 1578 C09 | X |        | 1220   | 1240       | -0.69980243 | 1345   | 1360       | -0.38445918  | 2150053     | -1.09037899 | 1959586     | -1.48424423 | experimental | ChemBridge | 5115800 |
| 1578 C10 | X |        | 1364   | 1320       | -0.60285147 | 1705   | 1720       | 0.08177498   | 2616298     | 0.00134512  | 2733141     | 0.1651446   | experimental | ChemBridge | 5130650 |
| 1578 C11 | X |        | 1020   | 1200       | -0.74712373 | 1020   | 1040       | -0.8053649   | 16051368    | 0.00013682  | 2678812     | -0.14472762 | experimental | ChemBridge | 5116052 |
| 1578 C12 | X |        | 1499   | 1520       | -0.37778673 | 1984   | 2000       | 0.44310624   | 2171901     | -1.03922127 | 1977289     | -1.44649756 | experimental | ChemBridge | 5154484 |
| 1578 C13 | X |        | 1461   | 1480       | -0.4216455  | 1101   | 1120       | -0.70046225  | 2642746     | 0.06327375  | 2559458     | -0.20518561 | experimental | ChemBridge | 5211833 |
| 1578 C14 | X |        | 1540   | 1560       | -0.33046543 | 2107   | 2120       | 0.60240287   | 2625006     | 0.02173511  | 2810455     | 0.32999502  | experimental | ChemBridge | 5155836 |
| 1578 C15 | X |        | 1778   | 1800       | -0.05577104 | 824    | 840        | -1.05920343  | 2767376     | 0.35509793  | 2787026     | 0.28003925  | experimental | ChemBridge | 5212148 |
| 1578 C16 | X |        | 2101   | 2120       | 0.31702849  | 868    | 880        | -1.00221927  | 2412329     | -0.47625326 | 2555697     | -0.21320489 | experimental | ChemBridge | 5156796 |
| 1578 C17 | X |        | 2219   | 2240       | 0.45322151  | 1706   | 1720       | 0.08306995   | 2419311     | -0.45990474 | 2601227     | -0.11612495 | experimental | ChemBridge | 5213200 |
| 1578 C18 | X |        | 1574   | 1600       | -0.28660666 | 1303   | 1320       | -0.43885315  | 2290473     | -0.76158205 | 2656193     | 0.00147974  | experimental | ChemBridge | 5160943 |
| 1578 C19 | X |        | 2058   | 2080       | 0.26739883  | 1423   | 1440       | -0.2834418   | 2109237     | -1.18595056 | 2311760     | -0.73333205 | experimental | ChemBridge | 5213858 |
| 1578 C20 | X |        | 3018   | 3040       | 1.37540982  | 1502   | 1520       | -0.18112933  | 2431791     | -0.43068251 | 2589184     | -0.14180326 | experimental | ChemBridge | 5162501 |
| 1578 C21 | X |        | 1855   | 1880       | 0.03310067  | 1823   | 1840       | 0.23459602   | 2418498     | -0.46180884 | 2834170     | 0.3805606   | experimental | ChemBridge | 5214537 |
| 1578 C22 | X |        | 2693   | 2720       | 1.00030193  | 1497   | 1520       | -0.18760481  | 2845796     | 0.53872027  | 2598520     | -0.12189687 | experimental | ChemBridge | 5137337 |
| 1578 C23 | N |        | 2725   | 3160       | 1.03723563  | 2406   | 2800       | 0.98963614   | 2333205     | -0.66152403 | 2223254     | -0.92204625 | empty        |            |         |
| 1578 C24 | P | 140402 | 141320 | 159.941016 | 129037      | 129760 | 164.988753 | 2351567      | -0.61852896 | 2341717     | -0.66945716 |             | experimental | ChemBridge | 5140350 |
| 1578 D01 | X |        | 2573   | 2600       | 0.86180056  | 3250   | 3280       | 2.08269593   | 2525537     | -0.20883245 | 2356817     | -0.63726065 | experimental | ChemBridge | 5261020 |
| 1578 D02 | X |        | 1220   | 1240       | -0.69980243 | 900    | 920        | -0.96077625  | 2599379     | -0.03827113 | 2786688     | 0.27931856  | experimental | ChemBridge | 5261020 |
| 1578 D03 | X |        | 1858   | 1880       | 0.03656321  | 938    | 960        | -0.91156266  | 3154838     | 1.26234964  | 3177856     | 1.1133745   | experimental | ChemBridge | 5141013 |
| 1578 D04 | X |        | 823    | 840        | -1.15801114 | 1065   | 1080       | -0.74708565  | 2678479     | 1.04694344  | 2920329     | 0.56427048  | experimental | ChemBridge | 5261675 |
| 1578 D05 | X |        | 1388   | 1400       | -0.50590005 | 986    | 1000       | -0.84939812  | 3024759     | 0.95776649  | 2924704     | 0.57359894  | experimental | ChemBridge | 5144030 |
| 1578 D06 | X |        | 1381   | 1400       | -0.51397975 | 1347   | 1360       | -0.38186899  | 2528899     | -0.20330177 | 2855130     | 0.42525191  | experimental | ChemBridge | 5262496 |
| 1578 D07 | X |        | 1570   | 1600       | -0.29584009 | 1061   | 1080       | -0.75226603  | 2895544     | 0.65520643  | 2807189     | 0.32303119  | experimental | ChemBridge | 5144180 |
| 1578 D08 | X |        | 1147   | 1160       | -0.78405743 | 1390   | 1420       | -0.32617996  | 26992491    | 0.17957288  | 2659291     | -0.41493268 | experimental | ChemBridge | 5136059 |
| 1578 D09 | X |        | 188    | 200        | -0.89096724 | 346    | 360        | -1.897825863 | 2913831     | 0.68902585  | 3092895     | 0.93221902  | experimental | ChemBridge | 5215082 |
| 1578 D10 | X |        | 1632   | 1660       | -0.22428105 | 1590   | 1600       | -0.06716101  | 3195888     | 1.64811577  | 3223388     | 1.21045871  | experimental | ChemBridge | 5169066 |
| 1578 D11 | X |        | 1104   | 1120       | -0.83368709 | 1066   | 1080       | -0.74579055  | 2568107     | -0.11149528 | 2940884     | 0.60809824  | experimental | ChemBridge | 5215423 |
| 1578 D12 | X |        | 1662   | 1680       | -0.1896557  | 1220   | 1240       | -0.54634599  | 2450890     | -0.38596174 | 2283451     | -0.79369305 | experimental | ChemBridge | 5169137 |
| 1578 D13 | X |        | 1543   | 1560       | -0.3270029  | 1306   | 1320       | -0.43496786  | 2431887     | -0.43045773 | 2261080     | -0.84139293 | experimental | ChemBridge | 5215572 |
| 1578 D14 | X |        | 1543   | 1560       | -0.3270029  | 1544   | 1560       | -0.12673536  | 2753869     | 0.32347096  | 3106431     | 0.96108074  | experimental | ChemBridge | 5172686 |
| 1578 D15 | X |        | 1461   | 1480       | -0.4216455  | 1066   | 1080       | -0.74579055  | 2569772     | -0.10759664 | 2495954     | -0.34059006 | experimental | ChemBridge | 5217526 |
| 1578 D16 | X |        | 1190   | 1200       | -0.4596955  | 1067   | 1100       | -0.80406981  | 2744452     | 0.49512109  | 2578621     | 0.41493268  | experimental | ChemBridge | 5173171 |
| 1578 D17 | X |        | 1461   | 1480       | -0.4216455  | 1303   | 1320       | -0.43885315  | 2427015     | -0.44186563 | 2502457     | -0.32672424 | experimental | ChemBridge | 5218494 |
| 1578 D18 | X |        | 1663   | 1680       | -0.18850152 | 1744   | 1760       | 0.13228355   | 2551923     | -0.14939051 | 2619491     | -0.0771821  | experimental | ChemBridge | 5267053 |
| 1578 D19 | X |        | 1497   | 1520       | -0.38009509 | 1506   | 1520       | -0.17594895  | 2414088     | -0.47213452 | 2404502     | -0.53558578 | experimental | ChemBridge | 5260219 |
| 1578 D20 | X |        | 1937   | 1960       | 0.12774328  | 1180   | 1200       | -0.59814978  | 2645203     | 0.06902688  | 2883257     | 0.48522484  | experimental | ChemBridge | 5267982 |
| 1578 D21 | X |        | 776    | 800        | -1.21225751 | 1421   | 1440       | -0.28603199  | 2304538     | -0.72864851 | 2734492     | 0.16802525  | experimental | ChemBridge | 5260741 |
| 1578 D22 | X |        | 2573   | 2600       | 0.86180056  | 1580   | 1600       | -0.08011196  | 2770124     | 0.36153244  | 2451115     | -0.43619664 | experimental | ChemBridge | 5268500 |
| 1578 D23 | N |        | 3240   | 3240       | 1.06262755  | 2334   | 2340       | 0.06267952   | 26444242    | 0.06677656  | 2747562     | 0.49492029  | empty        |            |         |
| 1578 D24 | P | 160709 | 161560 | 183.378911 | 125535      | 126240 | 160.453332 | 2503344      | -0.26313942 | 2278659     | -0.80391064 |             | empty        |            |         |
| 1578 E01 | X |        | 2584   | 2600       | 0.87449652  | 2743   | 2760       | 1.426083     | 2816197     | 0.46941349  | 2860043     | 0.43572751  | experimental | ChemBridge | 5193909 |
| 1578 E02 | X |        | 1174   | 1200       | -0.75289462 | 1251   | 1280       | -0.50619806  | 2970676     | 0.83112983  | 3099401     | 0.94609124  | experimental | ChemBridge | 5119355 |
| 1578 E03 | X |        | 3903   | 3920       | 2.39685745  | 4705   | 4720       | 3.96705849   | 2736072     | 0.28179886  | 2977932     | 0.6870927   | experimental | ChemBridge | 5111125 |
| 1578 E04 | X |        | 1100   | 1120       | -0.8383038  | 1854   | 1880       | 0.27474395   | 2718951     | 0.24170962  | 3324969     | 1.42705167  | experimental | ChemBridge | 5119806 |
| 1578 E05 | X |        | 942    | 960        | -1.02066394 | 1225   | 1240       | -0.53987052  | 2360017     | -0.59874308 | 2833794     | 0.37975888  | experimental | ChemBridge | 5114474 |
| 1578 E06 | X |        | 2364   | 2400       | -0.84366609 | 1225   | 1240       | -0.53987052  | 2827176     | 0.49512109  | 2429486     | -0.41493268 | experimental | ChemBridge | 5123420 |
| 1578 E07 | X |        | 1501   | 1520       | -0.37547838 | 1026   | 1040       | -0.79759434  | 2576736     | 0.05130857  | 2793997     | 0.29485991  | experimental | ChemBridge | 5115327 |
| 1578 E08 | X |        | 1188   | 1200       | -0.73673613 | 1028   | 1040       | -0.79500415  | 2883567     | 0.62716199  | 2739323     | 0.16681202  | experimental | ChemBridge | 5129946 |
| 1578 E09 | X |        | 231    | 240        | -1.84128458 | 432    | 440        | -1.5668805   | 1593651     | -2.39320773 | 1262111     | -2.97141385 | experimental | ChemBridge | 5115803 |
| 1578 E10 | X |        | 186    | 200        | -1.8932226  | 386    | 400        | -1.62645484  | 1133113     | -3.47156866 | 927534      | -3.68480537 | experimental | ChemBridge | 5130983 |
| 1578 E11 | X |        | 1106   | 1120       | -0.83137873 | 1026   | 1040       | -0.79759434  | 2277876     | -0.79107823 | 2965874     | 0.6613824   | experimental | ChemBridge | 5116053 |
| 1578 E12 | X |        | 2024   | 2040       | 0.22815678  | 1578   | 2600       | 1.22275315   | 3416532     | 1.87511251  | 3193682     | 1.147119    | experimental | ChemBridge | 5154843 |
| 1578 E13 | X |        | 1263   | 1280       | -0.65017277 | 1023   | 1040       | -0.80147962  | 2677204     | 0.143958    | 2790667     | -0.11509291 | experimental | ChemBridge | 5211878 |
| 1578 E14 | X |        | 1180   | 1200       | -0.74596955 | 1021   | 1040       | -0.80406981  | 2650584     | 0.08162662  | 2868461     | 0.49367653  | experimental | ChemBridge | 5156306 |
| 1578 E15 | X |        | 1818   | 1840       | -0.00960392 | 1342   | 1360       | -0.38834446  | 2576546     | -0.09173516 | 2543126     | -0.24000902 | experimental | ChemBridge | 5212505 |
| 1578 E16 | X |        | 1743   | 1760       | -0.09616727 | 1343   | 1360       | -0.38704937  | 2762747     | 0.34425902  | 2900124     | 0.52118899  | experimental | ChemBridge | 5156984 |
| 1578 E17 | X |        | 1261   | 1280       | -0.65248113 | 1465   | 1480       | -0.22904783  | 2340097     | -0.64538625 | 2372360     | -0.60411957 | experimental | ChemBridge | 5213269 |
| 1578 E18 | X |        | 1381   | 1400       | -0.51397975 | 1186   | 1200       | -0.59037921  | 2616374     | 0.00152307  | 2526702     | -0.27502859 | experimental | ChemBridge | 5161253 |
| 1578 E19 | X |        | 2179   | 2200       | 0.40705438  | 581    | 600        | -1.37391141  | 2388865     | -0.53119479 | 2087142     | -1.21226688 | experimental | ChemBridge | 5213911 |
| 1578 E20 | X |        | 2498   | 2520       | 0.7752372   | 2367   | 2400       | 0.96502934   | 2817029     | 0.47136164  | 3407601     | 1.60324121  | experimental | ChemBridge | 5162600 |
| 1578 E21 | X |        | 1777   | 1800       | -0.05692522 | 1374   | 1800       | 0.18148714   | 2792600     | 0.41416054  | 3424021     | 1.63825225  | experimental | ChemBridge | 5213420 |
| 1578 E22 | X |        | 2607   | 2640       | 0.90104262  | 1297   | 1320       | -0.44662371  | 2908874     | 0.68641895  | 3520228     | 1.84388667  | experimental | ChemBridge | 5214545 |
| 1578 E23 | N |        | 2463   | 2920       | 0.73484097  | 2379   | 2720       | 0.95466858   | 2221997     | -0.92192027 | 2535708     | -0.25582582 | empty        |            |         |
| 1578 E24 | P | 148355 | 149280 | 169.120194 | 110102      | 110920 | 140.466138 | 2563664      | -0.12189867 | 2579169     | -0.16315744 |             | empty        |            |         |
| 1578 F01 | X |        | 1864   | 1880       | 0.04348828  | 1303   | 1320       | -0.43885315  | 2620599     | 0.01141602  | 2573544     | -0.17515117 | experimental | ChemBridge | 5140718 |
| 1578 F02 | X |        | 1101   | 1120       | -0.83714962 | 1546   | 1560       | -0.12414517  | 1735923     | -2.06007437 | 1749206     | -1.93282052 | experimental | ChemBridge | 5261122 |
| 1578 F03 | X |        | 1536   | 1560       | -0.33508214 | 1012   | 1040       | -0.81572566  | 2924445     | 0.72287882  | 2861812     | 0.43949994  | experimental | ChemBridge | 5141040 |
| 1578 F04 | X |        | 1304   | 1320       | -0.60285147 | 1486   | 1480       | -0.29028508  | 2672867     | 0.13280781  | 2479256     | 0.26070023  | experimental | ChemBridge | 5261713 |
| 1578 F05 | X |        | 1304   | 1320       | -0.60285147 | 943    | 960        | -0.90509718  | 1655197     | 1.2805949   | 2901884     | 0.52481169  | experimental | ChemBridge | 5144033 |
| 1578 F06 | X |        | 1781   | 1800       | -0.05230851 | 1544   | 1560       | -0.12673536  | 2534653     | -0.18982864 | 2680213     | 0.05229052  | experimental | ChemBridge | 5262623 |
| 1578 F07 | X |        | 1183   | 1200       | -0.74250702 | 1543   | 1560       | -0.12803046  | 2821474     | 0.48176972  | 32          |             |              |            |         |

|          |   |        |            |             |        |        |             |         |             |         |             |              |            |         |
|----------|---|--------|------------|-------------|--------|--------|-------------|---------|-------------|---------|-------------|--------------|------------|---------|
| 1578 G01 | X | 1746   | 1760       | -0.09270474 | 1388   | 1400   | -0.32877011 | 3041635 | 0.99728206  | 3228041 | 1.22037992  | experimental | ChemBridge | 5194054 |
| 1578 G02 | X | 1863   | 1880       | 0.0423341   | 1063   | 1080   | -0.74967584 | 3144528 | 1.23820852  | 3198185 | 1.15672039  | experimental | ChemBridge | 5119483 |
| 1578 G03 | X | 1903   | 1920       | 0.08850122  | 1427   | 1440   | -0.27826142 | 2977566 | 0.84726294  | 3010366 | 0.75616381  | experimental | ChemBridge | 5111923 |
| 1578 G04 | X | 1344   | 1360       | -0.55668434 | 1023   | 1040   | -0.80147962 | 2805562 | 0.44451138  | 2668341 | 0.02697681  | experimental | ChemBridge | 5121924 |
| 1578 G05 | X | 1304   | 1320       | -0.60285147 | 1226   | 1240   | -0.53857543 | 2604810 | -0.02555433 | 2240452 | -0.66634345 | experimental | ChemBridge | 5114507 |
| 1578 G06 | X | 1580   | 1600       | -0.28429831 | 1658   | 1680   | 0.02090542  | 2786788 | 0.40055616  | 3232821 | 1.23057193  | experimental | ChemBridge | 5127036 |
| 1578 G07 | X | 1504   | 1520       | -0.37201584 | 1902   | 1920   | 0.33690848  | 2100811 | -1.20568024 | 2396328 | -0.55301454 | experimental | ChemBridge | 5115427 |
| 1578 G08 | X | 899    | 920        | -1.0702936  | 1376   | 1400   | -0.34431125 | 2510312 | -0.24682368 | 2807351 | 0.32337661  | experimental | ChemBridge | 5129951 |
| 1578 G09 | X | 1307   | 1320       | -0.59938893 | 1665   | 1680   | 0.02997108  | 2282154 | -0.78106119 | 2407588 | -0.52900575 | experimental | ChemBridge | 5115805 |
| 1578 G10 | X | 943    | 960        | -1.01950977 | 1263   | 1280   | -0.49065693 | 2416996 | -0.46532537 | 3049616 | 0.83993871  | experimental | ChemBridge | 5130991 |
| 1578 G11 | X | 622    | 640        | -1.39000994 | 945    | 960    | -0.90249699 | 1897962 | -1.68065611 | 2969499 | 0.6691117   | experimental | ChemBridge | 5161335 |
| 1578 G12 | X | 2185   | 2200       | 0.41397945  | 903    | 920    | -0.95689095 | 2875698 | 0.00873653  | 2240452 | -0.8853337  | experimental | ChemBridge | 5155676 |
| 1578 G13 | X | 1459   | 1480       | -0.42395386 | 2066   | 2080   | 0.54930399  | 2073442 | -1.26976542 | 1213208 | -1.11404406 | experimental | ChemBridge | 5211912 |
| 1578 G14 | X | 1738   | 1760       | -0.10193817 | 1097   | 1120   | -0.70564262 | 2559250 | -0.13223416 | 2813020 | 0.33546416  | experimental | ChemBridge | 5156343 |
| 1578 G15 | X | 2097   | 2120       | 0.31241178  | 1261   | 1280   | -0.49324712 | 3075344 | 1.0762125   | 2642651 | -0.0277999  | experimental | ChemBridge | 5212757 |
| 1578 G16 | X | 1741   | 1760       | -0.09847563 | 1223   | 1240   | -0.54246071 | 2585666 | -0.07038045 | 3119775 | 0.98953308  | experimental | ChemBridge | 5157043 |
| 1578 G17 | X | 1459   | 1480       | -0.42395386 | 1224   | 1240   | -0.54116562 | 2600229 | -0.03628084 | 2606805 | -0.10423143 | experimental | ChemBridge | 5213303 |
| 1578 G18 | X | 1423   | 1440       | -0.46550427 | 1226   | 1240   | -0.53857543 | 2578429 | -0.08732607 | 2841120 | 0.39537952  | experimental | ChemBridge | 5161800 |
| 1578 G19 | X | 1649   | 1680       | -0.20466002 | 1492   | 1520   | -0.19408028 | 2543467 | -0.16919044 | 2622213 | -0.07137819 | experimental | ChemBridge | 5214057 |
| 1578 G20 | X | 4701   | 4720       | 0.31789159  | 3826   | 3840   | 2.82867039  | 2589653 | -0.0610448  | 2409641 | -0.5246283  | experimental | ChemBridge | 5162729 |
| 1578 G21 | X | 1730   | 1760       | -0.11117159 | 1138   | 1160   | -0.65254375 | 2287989 | -0.7673984  | 2389481 | -0.56761384 | experimental | ChemBridge | 5214569 |
| 1578 G22 | X | 1727   | 1760       | -0.11463412 | 1137   | 1160   | -0.65383884 | 3043676 | 1.00206211  | 2582562 | -0.15592282 | experimental | ChemBridge | 5138038 |
| 1578 G23 | N | 2468   | 2840       | 0.74061186  | 2392   | 2800   | 0.97150481  | 2289830 | -0.76308765 | 2327041 | -0.70074961 | empty        |            |         |
| 1578 G24 | P | 120350 | 136.797436 |             | 133310 | 134120 | 0.522692    | 2516389 | -0.23259424 | 2554230 | -0.21633286 | empty        |            |         |
| 1578 H01 | X | 1140   | 1160       | -0.79213668 | 1700   | 1720   | 0.07529939  | 2739137 | 0.28897563  | 2940491 | 0.60726028  | experimental | ChemBridge | 5140739 |
| 1578 H02 | X | 1064   | 1120       | -0.83599545 | 1144   | 1280   | -0.17858114 | 2281188 | -0.7833231  | 2623396 | -0.0709868  | experimental | ChemBridge | 5261126 |
| 1578 H03 | X | 1062   | 1080       | -0.87985421 | 1304   | 1320   | -0.43755805 | 2563645 | -0.29194316 | 3045022 | -0.07694329 | experimental | ChemBridge | 5141496 |
| 1578 H04 | X | 1062   | 1080       | -0.88216257 | 1181   | 1200   | -0.59685468 | 2527940 | -0.20554729 | 2794421 | 0.29542382  | experimental | ChemBridge | 5261933 |
| 1578 H05 | X | 1181   | 1200       | -0.74481537 | 1061   | 1080   | -0.75226603 | 2847940 | 0.5437405   | 3102629 | 0.95297404  | experimental | ChemBridge | 5144040 |
| 1578 H06 | X | 2300   | 2320       | 0.54670993  | 2703   | 2720   | 1.37427922  | 2475067 | -0.32935071 | 2896124 | 0.51266011  | experimental | ChemBridge | 5262721 |
| 1578 H07 | X | 1680   | 1720       | -0.16888005 | 1612   | 1640   | -0.03866893 | 2722254 | 0.24944367  | 2858426 | 0.43227971  | experimental | ChemBridge | 5144227 |
| 1578 H08 | X | 3343   | 3360       | 1.75051771  | 3303   | 3320   | 2.15133594  | 2749685 | 0.31367403  | 3204436 | 1.17004889  | experimental | ChemBridge | 5169012 |
| 1578 H09 | X | 1016   | 1040       | -0.93525476 | 1617   | 1640   | -0.03219346 | 2888535 | 0.63879468  | 2894268 | 0.50870271  | experimental | ChemBridge | 5215116 |
| 1578 H10 | X | 2104   | 2120       | 0.20406112  | 1261   | 1280   | -0.49324712 | 2097913 | -0.21468921 | 2712469 | 0.88650851  | experimental | ChemBridge | 5169083 |
| 1578 H11 | X | 1704   | 1720       | -0.14118022 | 2065   | 2080   | 0.5480089   | 2955871 | 0.79646356  | 3184045 | 1.12657081  | experimental | ChemBridge | 5215587 |
| 1578 H12 | X | 1660   | 1680       | -0.19196406 | 1423   | 1440   | -0.2834418  | 2744152 | 0.30071837  | 2752994 | 0.20747557  | experimental | ChemBridge | 5169180 |
| 1578 H13 | X | 2019   | 2040       | 0.22238588  | 1857   | 1880   | 0.27862923  | 2715399 | 0.23339252  | 2900946 | 0.52294167  | experimental | ChemBridge | 5215587 |
| 1578 H14 | X | 1939   | 1960       | 0.13005164  | 1903   | 1920   | 0.33820358  | 2357322 | -0.60505349 | 2538964 | -0.24888331 | experimental | ChemBridge | 5172848 |
| 1578 H15 | X | 1460   | 1480       | -0.42279968 | 1423   | 1440   | -0.2834418  | 2515947 | -0.23362919 | 2662827 | 0.01521976  | experimental | ChemBridge | 5217961 |
| 1578 H16 | X | 1461   | 1480       | -0.4216455  | 1422   | 1440   | -0.2847369  | 2749141 | 0.31240024  | 3034177 | 0.80701937  | experimental | ChemBridge | 5173336 |
| 1578 H17 | X | 2264   | 2280       | 0.18515952  | 1824   | 1840   | -0.50515925 | 2538429 | -0.18098704 | 2816236 | -0.23280292 | experimental | ChemBridge | 5218281 |
| 1578 H18 | X | 1291   | 1320       | -0.61785578 | 1206   | 1240   | -0.56447732 | 2578884 | -0.08626067 | 2619603 | -0.07694329 | experimental | ChemBridge | 5215836 |
| 1578 H19 | X | 2661   | 2680       | 0.96336823  | 3104   | 3120   | 1.89361213  | 2292241 | -0.75744223 | 2885698 | 0.49042959  | experimental | ChemBridge | 5260356 |
| 1578 H20 | X | 1527   | 1560       | -0.34546975 | 1329   | 1360   | -0.40518069 | 2497924 | -0.27583048 | 2584632 | -0.15150913 | experimental | ChemBridge | 5268238 |
| 1578 H21 | X | 1817   | 1840       | -0.01075809 | 1582   | 1600   | -0.07752177 | 2930451 | 0.73694202  | 2573048 | -0.17620875 | experimental | ChemBridge | 5260769 |
| 1578 H22 | X | 2736   | 2760       | 1.04993159  | 2101   | 2120   | 0.5946323   | 2607875 | -0.01837754 | 2479114 | -0.37649664 | experimental | ChemBridge | 5268610 |
| 1578 H23 | N | 2662   | 2960       | 0.96452241  | 12744  | 12760  | 0.95725877  | 2676884 | 0.14320871  | 2411344 | -0.52099713 | empty        |            |         |
| 1578 H24 | P | 93665  | 94.991893  |             | 122744 | 123480 | 156.8387723 | 2465658 | -0.35118211 | 2552221 | -0.42744175 | empty        |            |         |
| 1578 I01 | X | 3967   | 3960       | 4.47676129  | 4026   | 4040   | 0.8868993   | 3198467 | 0.6684953   | 2802257 | 0.31251509  | experimental | ChemBridge | 5194136 |
| 1578 I02 | X | 2016   | 2040       | 0.21892335  | 1417   | 1440   | -0.29121237 | 2655319 | 0.09271374  | 3123097 | 0.99661631  | experimental | ChemBridge | 5119533 |
| 1578 I03 | X | 1540   | 1560       | -0.33046543 | 1180   | 1200   | -0.59814978 | 3099651 | 1.13312793  | 2892267 | 0.50443614  | experimental | ChemBridge | 5191940 |
| 1578 I04 | X | 2583   | 2600       | 0.87334234  | 3026   | 3040   | 1.79259475  | 3096492 | 1.12573106  | 2606606 | -0.10580714 | experimental | ChemBridge | 5212966 |
| 1578 I05 | X | 1777   | 1800       | -0.05692522 | 1219   | 1240   | -0.54764109 | 3049461 | 1.01560683  | 2902103 | 0.52540865  | experimental | ChemBridge | 5114509 |
| 1578 I06 | X | 2484   | 2520       | 0.75907871  | 1621   | 1640   | -0.02701308 | 3794640 | 2.7604616   | 3171322 | 1.09944258  | experimental | ChemBridge | 5127824 |
| 1578 I07 | X | 6577   | 6600       | 5.48312972  | 1583   | 1600   | -0.07622667 | 4211432 | 3.71034887  | 2569754 | -0.18323228 | experimental | ChemBridge | 5115555 |
| 1578 I08 | X | 2154   | 2200       | 0.37819993  | 1089   | 1120   | -0.71600338 | 3808997 | 2.79314225  | 3071457 | 0.88650851  | experimental | ChemBridge | 5129953 |
| 1578 I09 | X | 1342   | 1360       | -0.5589927  | 1584   | 1600   | -0.07493158 | 2923997 | 0.72182982  | 2778322 | 0.26148042  | experimental | ChemBridge | 5115838 |
| 1578 I10 | X | 1741   | 1760       | -0.09847563 | 1423   | 1440   | -0.2834418  | 2873034 | 0.60249871  | 3055431 | 0.85233756  | experimental | ChemBridge | 5131173 |
| 1578 I11 | X | 1102   | 1120       | -0.83599545 | 1381   | 1400   | -0.33783577 | 2606763 | -0.02098132 | 2902338 | 0.52590972  | experimental | ChemBridge | 5116156 |
| 1578 I12 | X | 1102   | 1120       | -0.83599545 | 1101   | 1120   | -0.70046225 | 2599492 | -0.03800654 | 2900940 | 0.52292888  | experimental | ChemBridge | 5155727 |
| 1578 I13 | X | 2181   | 2200       | 0.40936274  | 2622   | 2640   | 1.26937656  | 2418104 | -0.46273096 | 2590482 | -0.13903564 | experimental | ChemBridge | 5211915 |
| 1578 I14 | X | 2101   | 2120       | 0.31702849  | 1380   | 1400   | -0.33913087 | 2534578 | -0.19000425 | 2430490 | -0.48017366 | experimental | ChemBridge | 5156401 |
| 1578 I15 | X | 1177   | 1200       | -0.74943209 | 1102   | 1120   | -0.6916715  | 2877880 | 0.61361159  | 2538005 | -0.25092811 | experimental | ChemBridge | 5212807 |
| 1578 I16 | X | 1064   | 1080       | -0.87985421 | 1583   | 1600   | -0.07622667 | 3066025 | 1.05493184  | 2910192 | 0.54265617  | experimental | ChemBridge | 5157217 |
| 1578 I17 | X | 1333   | 1360       | -0.5693803  | 1409   | 1440   | -0.30157313 | 2546822 | -0.16133463 | 2568272 | -0.18639223 | experimental | ChemBridge | 5213504 |
| 1578 I18 | X | 3582   | 3600       | 2.02636628  | 5383   | 5400   | 4.84513259  | 2902163 | 0.67070498  | 3634608 | 2.0872699   | experimental | ChemBridge | 5161820 |
| 1578 I19 | X | 1970   | 2000       | 0.16583116  | 1446   | 1480   | -0.25365463 | 2902909 | 0.67245175  | 2623544 | -0.06854021 | experimental | ChemBridge | 5214059 |
| 1578 I20 | X | 2301   | 2320       | 0.54786411  | 2143   | 2160   | 0.64902627  | 2761009 | 0.34018945  | 3037453 | 0.81400452  | experimental | ChemBridge | 5162793 |
| 1578 I21 | X | 1699   | 1720       | -0.14695111 | 1622   | 1640   | -0.02571799 | 2748323 | 0.31048487  | 2584404 | -0.15199527 | experimental | ChemBridge | 5214578 |
| 1578 I22 | X | 1560   | 1560       | -0.33623652 | 1056   | 1060   | -0.73817415 | 2824899 | 0.48978944  | 2642271 | -0.24183207 | experimental | ChemBridge | 5138617 |
| 1578 I23 | X | 2521   | 2840       | 0.8017833   | 2200   | 2560   | 0.72284666  | 2387803 | -0.53368149 | 2551426 | -0.22231116 | experimental | ChemBridge | 5138617 |
| 1578 I24 | P | 101456 | 102320     | 114.990395  | 116504 | 117280 | 148.757333  | 2418414 | -0.46200508 | 2429717 | -0.48182187 | empty        |            |         |
| 1578 J01 | X | 1372   | 1400       | -0.52436735 | 1609   | 1640   | -0.04255422 | 4873706 | 5.2871209   | 5083797 | 5.17725857  | experimental | ChemBridge | 5140778 |
| 1578 J02 | X | 1582   | 1600       | -0.28198995 | 1303   | 1320   | -0.43885315 | 2636314 | 0.04821307  | 2755246 | 0.21227733  | experimental | ChemBridge | 5261175 |
| 1578 J03 | X | 1064   | 1080       | -0.87985421 | 1103   | 1120   |             |         |             |         |             |              |            |         |

|          |   |        |        |             |        |        |             |         |             |         |             |              |            |          |
|----------|---|--------|--------|-------------|--------|--------|-------------|---------|-------------|---------|-------------|--------------|------------|----------|
| 1578 J19 | X | 1702   | 1720   | -0.14348858 | 1104   | 1120   | -0.69657696 | 2882312 | 0.62422338  | 2912718 | 0.54804216  | experimental | ChemBridge | 5260358  |
| 1578 J20 | X | 1339   | 1360   | -0.56245523 | 1261   | 1280   | -0.49324712 | 2922834 | 0.71910663  | 2974825 | 0.6804679   | experimental | ChemBridge | 5268261  |
| 1578 J21 | X | 1543   | 1560   | -0.32700229 | 1501   | 1520   | -0.18242443 | 2652651 | 0.08646655  | 2616550 | -0.08345295 | experimental | ChemBridge | 5260784  |
| 1578 J22 | X | 1413   | 1440   | -0.47704605 | 2098   | 2120   | -0.59074702 | 2442354 | -0.40594899 | 2733754 | 0.16645167  | experimental | ChemBridge | 5268728  |
| 1578 J23 | N | 2673   | 3280   | 0.97721837  | 2807   | 3240   | 1.50896905  | 3629390 | 0.05541556  | 2762615 | 0.15122916  | empty        |            |          |
| 1578 J24 | P | 200303 | 201280 | 229.077439  | 141159 | 141840 | 180.687889  | 2424284 | -0.44826034 | 2672464 | 0.03576795  | empty        |            |          |
| 1578 K01 | X | 4227   | 4240   | 2.77081116  | 5226   | 5240   | 4.64180275  | 3003536 | 0.90807232  | 3238126 | 1.24188335  | experimental | ChemBridge | 5194204  |
| 1578 K02 | X | 1537   | 1560   | -0.33392797 | 1652   | 1680   | 0.01313485  | 2874593 | 0.60614915  | 3035719 | 0.81030725  | experimental | ChemBridge | 5119550  |
| 1578 K03 | X | 1065   | 1080   | -0.87870004 | 1824   | 1840   | 0.23589111  | 2762127 | 0.34280727  | 3066972 | 0.8769455   | experimental | ChemBridge | 5112086  |
| 1578 K04 | X | 1419   | 1440   | -0.47012098 | 1616   | 1640   | -0.03348855 | 2891508 | 0.64575603  | 2846589 | 0.40704063  | experimental | ChemBridge | 5112204  |
| 1578 K05 | X | 1703   | 1720   | 0.1423344   | 1862   | 1880   | 0.2851047   | 2620876 | 0.01206462  | 2669892 | 0.03028389  | experimental | ChemBridge | 5114577  |
| 1578 K06 | X | 1661   | 1680   | -0.19080988 | 1182   | 1200   | -0.59555959 | 2599533 | 0.11962419  | 320461  | 1.17061393  | experimental | ChemBridge | 5128194  |
| 1578 K07 | X | 1656   | 1680   | -0.19658077 | 1263   | 1280   | -0.49065693 | 3048601 | 1.01359312  | 2526164 | -0.27617572 | experimental | ChemBridge | 5115631  |
| 1578 K08 | X | 3572   | 3600   | 2.01482449  | 1656   | 1680   | 0.01831523  | 3144971 | 1.23924582  | 3190918 | 1.14122555  | experimental | ChemBridge | 5130345  |
| 1578 K09 | X | 1697   | 1720   | -0.14925947 | 1742   | 1760   | 0.12969336  | 2487596 | -0.30001375 | 2890040 | 0.49968769  | experimental | ChemBridge | 5115839  |
| 1578 K10 | X | 1382   | 1400   | -0.51282557 | 1462   | 1480   | -0.23293311 | 2544007 | -0.16792602 | 2793282 | 0.29337842  | experimental | ChemBridge | 5131432  |
| 1578 K11 | X | 1461   | 1480   | -0.4216455  | 1542   | 1560   | -0.12932555 | 2341289 | -0.64259515 | 2794737 | 0.2964808   | experimental | ChemBridge | 5116157  |
| 1578 K12 | X | 1264   | 1280   | -0.64901859 | 1624   | 1640   | -0.0231278  | 2475746 | -0.32776081 | 2824575 | 0.36010196  | experimental | ChemBridge | 51155739 |
| 1578 K13 | X | 1540   | 1560   | -0.33046543 | 1216   | 1240   | -0.55152637 | 2718727 | 0.24118512  | 2446691 | -0.44562958 | experimental | ChemBridge | 5212001  |
| 1578 K14 | X | 2781   | 2800   | 1.10186961  | 3102   | 3120   | 1.89102194  | 2122369 | -1.15520166 | 2404493 | -0.53560497 | experimental | ChemBridge | 5156699  |
| 1578 K15 | X | 1655   | 1680   | -0.19773495 | 1536   | 1560   | -0.13709612 | 2371432 | -0.57201458 | 2944964 | 0.6167977   | experimental | ChemBridge | 5123024  |
| 1578 K16 | X | 1421   | 1440   | -0.46781263 | 1782   | 1800   | 0.18149714  | 2770953 | 0.36347357  | 3610633 | 2.03614995  | experimental | ChemBridge | 5158408  |
| 1578 K17 | X | 2220   | 2240   | 0.45437569  | 1501   | 1520   | -0.18242443 | 2753844 | 0.32341243  | 3226298 | 1.21666347  | experimental | ChemBridge | 5123591  |
| 1578 K18 | X | 1821   | 1840   | -0.00614138 | 1584   | 1600   | -0.07493158 | 1813004 | -1.87958734 | 3152969 | 1.06030996  | experimental | ChemBridge | 5161922  |
| 1578 K19 | X | 1340   | 1360   | -0.56130105 | 1181   | 1200   | -0.59685468 | 2279006 | -0.78843231 | 2921764 | 0.56733021  | experimental | ChemBridge | 5124085  |
| 1578 K20 | X | 1704   | 1720   | -0.14118007 | 1584   | 1600   | -0.07493158 | 2805171 | 0.44495985  | 276354  | 1.29653029  | experimental | ChemBridge | 5162345  |
| 1578 K21 | X | 1179   | 1200   | -0.74712373 | 1502   | 1520   | -0.18112933 | 2166943 | -1.0508305  | 2421011 | -0.39374041 | experimental | ChemBridge | 5124753  |
| 1578 K22 | X | 2736   | 2760   | 1.04993159  | 1856   | 1880   | 0.27733414  | 2877596 | 0.61318075  | 2719554 | 0.12849817  | experimental | ChemBridge | 5140095  |
| 1578 K23 | N | 3381   | 4080   | 1.79437647  | 2604   | 2960   | 1.24606486  | 2702087 | 0.20222215  | 2676312 | 0.04397273  | empty        |            |          |
| 1578 K24 | P | 230838 | 231920 | 264.320268  | 114057 | 114800 | 145.588237  | 3820622 | 2.82129908  | 2704452 | 0.10397338  | empty        |            |          |
| 1578 L01 | X | 1333   | 1360   | -0.5693803  | 1370   | 1400   | -0.35208181 | 2860770 | 0.57378226  | 2571906 | -0.17864375 | experimental | ChemBridge | 5140811  |
| 1578 L02 | X | 1102   | 1120   | -0.83599545 | 1262   | 1280   | -0.49195202 | 2315483 | -0.70302053 | 2489774 | -0.35376718 | experimental | ChemBridge | 5261280  |
| 1578 L03 | X | 1215   | 1240   | -0.7057332  | 1055   | 1080   | -0.76003659 | 2705238 | 0.20960209  | 2791833 | 0.29028883  | experimental | ChemBridge | 5141877  |
| 1578 L04 | X | 3206   | 3280   | 1.56931174  | 3061   | 3200   | 1.83791232  | 2862529 | -0.04049558 | 2814812 | -0.38097198 | experimental | ChemBridge | 5212405  |
| 1578 L05 | X | 1056   | 1080   | -0.88908764 | 1976   | 2000   | 0.43274548  | 2800824 | 0.43341724  | 3408866 | 1.60593847  | experimental | ChemBridge | 5144111  |
| 1578 L06 | X | 1622   | 1640   | -0.23582283 | 2021   | 2040   | 0.49102474  | 2576385 | -0.09211214 | 2493009 | -0.34686945 | experimental | ChemBridge | 5262889  |
| 1578 L07 | X | 1699   | 1720   | -0.14695111 | 1623   | 1640   | -0.02442289 | 2372144 | -0.57034742 | 2444715 | -0.44984285 | experimental | ChemBridge | 5144439  |
| 1578 L08 | X | 1695   | 1720   | -0.15156782 | 1140   | 1160   | -0.64995356 | 2797388 | 0.42537176  | 2944418 | 0.61563351  | experimental | ChemBridge | 5169045  |
| 1578 L09 | X | 1623   | 1640   | -0.23466865 | 1863   | 1880   | 0.2863998   | 2598238 | -0.04094281 | 3038853 | 0.81634996  | experimental | ChemBridge | 5125242  |
| 1578 L10 | X | 1180   | 1200   | -0.74596955 | 1380   | 1400   | -0.33913087 | 1998641 | -1.44491378 | 2216569 | -0.93630014 | experimental | ChemBridge | 5169104  |
| 1578 L11 | X | 2186   | 2200   | -0.46344411 | 1423   | 1440   | -0.41513233 | 2821476 | 0.4401784   | 3413283 | 0.25682276  | experimental | ChemBridge | 5215542  |
| 1578 L12 | X | 1361   | 1360   | -0.56014688 | 1622   | 1640   | -0.02571799 | 2547048 | -0.16080544 | 2626292 | -0.06266595 | experimental | ChemBridge | 5170706  |
| 1578 L13 | X | 1460   | 1480   | -0.42279968 | 1702   | 1720   | 0.07788958  | 2686778 | 0.16633757  | 2806741 | 0.32207596  | experimental | ChemBridge | 5216193  |
| 1578 L14 | X | 1935   | 1960   | 0.12543492  | 2012   | 2040   | 0.47936888  | 2687874 | 0.16894207  | 2997600 | 0.72902919  | experimental | ChemBridge | 5173069  |
| 1578 L15 | X | 1102   | 1120   | -0.83599545 | 1462   | 1480   | -0.23293311 | 2670008 | 0.12710839  | 2906349 | 0.53446205  | experimental | ChemBridge | 5218328  |
| 1578 L16 | X | 1144   | 1160   | -0.64606827 | 1143   | 1160   | -0.64606827 | 2439784 | -0.41196671 | 2408196 | -0.52770936 | experimental | ChemBridge | 5173350  |
| 1578 L17 | X | 1218   | 1240   | -0.70211078 | 1223   | 1240   | -0.54246071 | 2447079 | -0.39488529 | 2470679 | -0.39448191 | experimental | ChemBridge | 5218903  |
| 1578 L18 | X | 1563   | 1600   | -0.28083577 | 2144   | 2200   | -0.59555958 | 2598429 | -0.04049558 | 3165088 | -0.12740226 | experimental | ChemBridge | 5267444  |
| 1578 L19 | X | 1542   | 1560   | -0.32815708 | 2144   | 2160   | 0.65032136  | 2552326 | -0.14844668 | 3083861 | -0.91295656 | experimental | ChemBridge | 5260566  |
| 1578 L20 | X | 1424   | 1440   | -0.46435009 | 1542   | 1560   | -0.12932555 | 2438855 | -0.41414198 | 2812177 | 0.3336667   | experimental | ChemBridge | 5268298  |
| 1578 L21 | X | 1302   | 1320   | -0.60515982 | 1260   | 1280   | -0.49454221 | 2408574 | -0.48504568 | 3881398 | 2.61348029  | experimental | ChemBridge | 5269799  |
| 1578 L22 | X | 1613   | 1640   | -0.24621043 | 1498   | 1520   | -0.18630971 | 2405459 | -0.49233953 | 2580800 | -0.15967979 | experimental | ChemBridge | 5268909  |
| 1578 L23 | N | 2806   | 3320   | 1.13072406  | 2577   | 2920   | 1.2110973   | 2732756 | 0.27403436  | 2563351 | -0.19688488 | empty        |            |          |
| 1578 L24 | P | 167203 | 168200 | 190.874143  | 111188 | 111840 | 141.872611  | 2879447 | 0.61751491  | 2593680 | -0.13221861 | empty        |            |          |
| 1578 M01 | X | 3987   | 4000   | 2.49380841  | 3866   | 3880   | 2.88047417  | 2853252 | 0.55617698  | 2823648 | 0.35812539  | experimental | ChemBridge | 5194213  |
| 1578 M02 | X | 1926   | 1960   | 0.11504732  | 1971   | 2000   | 0.42627001  | 2958497 | 0.80026124  | 2814712 | 0.33097188  | experimental | ChemBridge | 5119600  |
| 1578 M03 | X | 3302   | 3320   | 1.7031964   | 2541   | 2560   | 1.1644739   | 2476875 | -0.32511723 | 2230600 | -0.90753437 | experimental | ChemBridge | 5113007  |
| 1578 M04 | X | 1170   | 1200   | -0.75751133 | 1973   | 2000   | 0.42886602  | 3229023 | 1.43605562  | 2895966 | 0.51232322  | experimental | ChemBridge | 5122191  |
| 1578 M05 | X | 1625   | 1640   | -0.23236029 | 1418   | 1440   | -0.28991727 | 2711654 | 0.22462351  | 2518137 | -0.29329104 | experimental | ChemBridge | 5114807  |
| 1578 M06 | X | 1621   | 1640   | -0.236977   | 1623   | 1640   | -0.02442289 | 3239217 | 1.45992512  | 3305732 | 1.38603417  | experimental | ChemBridge | 5128282  |
| 1578 M07 | X | 2060   | 2080   | 0.26970719  | 1221   | 1240   | -0.5450509  | 1888617 | -1.70253766 | 1664081 | -2.11432568 | experimental | ChemBridge | 5115663  |
| 1578 M08 | X | 1660   | 1680   | -0.19196406 | 1624   | 1640   | -0.0231278  | 2677979 | 0.14577268  | 2546286 | -0.23327121 | experimental | ChemBridge | 5130381  |
| 1578 M09 | X | 1098   | 1120   | -0.84061216 | 1371   | 1400   | -0.34301615 | 2367750 | -0.58063607 | 2413283 | -0.51686276 | experimental | ChemBridge | 5115581  |
| 1578 M10 | X | 1667   | 1680   | -0.18508481 | 2024   | 2040   | 0.49491002  | 2717670 | 0.23871012  | 2780911 | 0.26700073  | experimental | ChemBridge | 5131445  |
| 1578 M11 | X | 898    | 920    | -1.07144778 | 1380   | 1400   | -0.33913087 | 2185112 | -1.0082874  | 2338301 | -0.6764082  | experimental | ChemBridge | 5116230  |
| 1578 M12 | X | 1505   | 1520   | -0.37086167 | 1424   | 1440   | -0.28214671 | 3706606 | 2.55432784  | 2760993 | 0.22453119  | experimental | ChemBridge | 5155786  |
| 1578 M13 | X | 1976   | 2000   | 0.17275623  | 1377   | 1400   | -0.34301615 | 2226738 | -0.9108191  | 2131795 | -1.11705689 | experimental | ChemBridge | 5212095  |
| 1578 M14 | X | 3219   | 3240   | 1.60739962  | 3179   | 3200   | 1.99074422  | 4538651 | 4.50258146  | 4342048 | 3.59568708  | experimental | ChemBridge | 5156701  |
| 1578 M15 | X | 1419   | 1440   | -0.47012098 | 1579   | 1600   | -0.08140705 | 2624000 | 0.01937954  | 2755213 | 0.25485135  | experimental | ChemBridge | 5213048  |
| 1578 M16 | X | 1621   | 1640   | -0.236977   | 1383   | 1400   | -0.35245358 | 3024895 | 0.95080194  | 2635088 | 0.12878389  | experimental | ChemBridge | 5160007  |
| 1578 M17 | X | 2464   | 2480   | 0.7359145   | 1825   | 1840   | 0.23718624  | 2479919 | -0.31798693 | 2364288 | -0.62133084 | experimental | ChemBridge | 5213768  |
| 1578 M18 | X | 1380   | 1400   | -0.51513393 | 1222   | 1240   | -0.54375581 | 2563957 | -0.12121261 | 2411643 | -0.52035996 | experimental | ChemBridge | 5161930  |
| 1578 M19 | X | 1736   | 1760   | -0.10424652 | 1422   | 1440   | -0.2847369  | 2349235 | -0.6239894  | 1997412 | -1.40359091 | experimental | ChemBridge | 5214159  |
| 1578 M20 | X | 1021   | 1040   | -0.92948387 | 1061   | 1080   | -0.75226603 | 3292548 | 1.58480096  | 4196063 | 3.28441506  | experimental | ChemBridge | 5162985  |
| 1578 M21 | X | 1784   | 1800   | -0.04884597 | 2145   |        |             |         |             |         |             |              |            |          |

|          |   |        |        |             |        |        |             |         |             |         |             |              |            |         |
|----------|---|--------|--------|-------------|--------|--------|-------------|---------|-------------|---------|-------------|--------------|------------|---------|
| 1578 N13 | X | 2021   | 2040   | 0.22469424  | 1461   | 1480   | -0.23422821 | 2788553 | 0.40468439  | 2854113 | 0.42308345  | experimental | ChemBridge | 5216447 |
| 1578 N14 | X | 1774   | 1800   | -0.06038775 | 2099   | 2120   | 0.59204211  | 1882139 | -1.71770605 | 2013108 | -1.3701236  | experimental | ChemBridge | 5173151 |
| 1578 N15 | X | 1341   | 1360   | -0.56014688 | 1298   | 1320   | -0.44532862 | 2605841 | -0.0231402  | 2756101 | 0.21410037  | experimental | ChemBridge | 5218347 |
| 1578 N16 | X | 1500   | 1520   | -0.37663256 | 1182   | 1200   | -0.59555892 | 2571322 | -1.13018515 | 2807010 | 0.3226492   | experimental | ChemBridge | 5173622 |
| 1578 N17 | X | 1421   | 1440   | -0.74943209 | 1421   | 1440   | -0.28603199 | 2701847 | 0.20166011  | 2840133 | -0.24839075 | experimental | ChemBridge | 5218908 |
| 1578 N18 | X | 1215   | 1240   | -0.70557332 | 1623   | 1640   | -0.02442289 | 2126012 | -1.14667148 | 2695256 | 0.0843655   | experimental | ChemBridge | 5267649 |
| 1578 N19 | X | 4380   | 4400   | 2.94740041  | 1662   | 1680   | 0.02608579  | 2682592 | 0.15657413  | 2942801 | -0.34731295 | experimental | ChemBridge | 5260598 |
| 1578 N20 | X | 1376   | 1400   | -0.51975064 | 1343   | 1360   | -0.38704937 | 2364310 | -0.58869092 | 2765125 | 0.23334152  | experimental | ChemBridge | 5268370 |
| 1578 N21 | X | 1133   | 1160   | -0.80021592 | 1500   | 1520   | -0.18371952 | 2689566 | 0.17290392  | 2713552 | 0.12337658  | experimental | ChemBridge | 5260895 |
| 1578 N22 | X | 2137   | 2160   | 0.3585789   | 1576   | 1600   | -0.08529234 | 2256264 | -0.84168326 | 2509503 | -0.31170063 | experimental | ChemBridge | 5268958 |
| 1578 N23 | N | 2691   | 3040   | 0.99799358  | 3447   | 3840   | 2.33782956  | 3516462 | 2.10910104  | 3095060 | 0.93683528  | empty        |            |         |
| 1578 N24 | P | 111606 | 112280 | 126.705303  | 128803 | 129400 | 164.692177  | 2415586 | -0.46862699 | 243371  | -0.47296463 | empty        |            |         |
| 1578 O01 | X | 548    | 560    | -1.47541012 | 1066   | 1080   | -0.74579055 | 1506598 | -2.59704444 | 1696789 | -2.04458505 | experimental | ChemBridge | 5194243 |
| 1578 O02 | X | 1694   | 1720   | -0.152722   | 1731   | 1760   | 0.11544732  | 2828584 | 0.49841796  | 2653489 | -0.00469091 | experimental | ChemBridge | 5119651 |
| 1578 O03 | X | 3496   | 3520   | 1.92710696  | 4815   | 4840   | 4.10951889  | 2631625 | 0.03723366  | 2903752 | 0.52892468  | experimental | ChemBridge | 5113156 |
| 1578 O04 | X | 1976   | 2000   | 0.17275623  | 1370   | 1400   | -0.35208181 | 2729050 | 0.26535667  | 2617095 | -0.08229089 | experimental | ChemBridge | 5122606 |
| 1578 O05 | X | 1539   | 1560   | -0.33161961 | 1458   | 1480   | -0.23811349 | 2285393 | -0.77347699 | 2020000 | -0.96736444 | experimental | ChemBridge | 5114990 |
| 1578 O06 | X | 2504   | 2520   | 0.78216227  | 3104   | 3120   | 1.89361213  | 2525506 | -0.21124656 | 2639529 | -0.03445669 | experimental | ChemBridge | 5128636 |
| 1578 O07 | X | 1097   | 1120   | -0.84176634 | 1654   | 1680   | 0.01572504  | 2181271 | -1.01728119 | 2554459 | -0.21584458 | experimental | ChemBridge | 5115667 |
| 1578 O08 | X | 1584   | 1600   | -0.27968159 | 1461   | 1480   | -0.23422821 | 2452181 | -0.38293883 | 2555756 | -0.20924109 | experimental | ChemBridge | 5130458 |
| 1578 O09 | X | 1339   | 1360   | -0.56245523 | 1378   | 1400   | -0.34172106 | 2246575 | -0.86437029 | 2279229 | -0.80269528 | experimental | ChemBridge | 5116029 |
| 1578 O10 | X | 1342   | 1360   | -0.5589927  | 1341   | 1360   | -0.38963955 | 2217292 | -0.93293714 | 2470734 | -0.39436463 | experimental | ChemBridge | 5131913 |
| 1578 O11 | X | 1780   | 1800   | -0.05346268 | 1654   | 1680   | -0.33783577 | 2353702 | -0.61352981 | 2430352 | -0.48046791 | experimental | ChemBridge | 5116245 |
| 1578 O12 | X | 1423   | 1440   | -0.46550427 | 1363   | 1400   | -0.33524558 | 2655472 | 0.09307199  | 2418581 | -0.50556626 | experimental | ChemBridge | 5155807 |
| 1578 O13 | X | 1735   | 1760   | -0.1054007  | 1898   | 1920   | 0.33172811  | 2470314 | -0.34047997 | 2414840 | -0.5135429  | experimental | ChemBridge | 5212113 |
| 1578 O14 | X | 2180   | 2200   | -0.48028045 | 2676   | 2720   | -0.34431125 | 1934702 | -1.59460851 | 1867917 | -0.15129473 | experimental | ChemBridge | 5172482 |
| 1578 O15 | X | 1977   | 1800   | -0.05692522 | 2663   | 2680   | 1.32247542  | 3335200 | 0.65683162  | 223667  | -0.89343827 | experimental | ChemBridge | 5213089 |
| 1578 O16 | X | 2813   | 2840   | 1.13880331  | 1890   | 1920   | 0.32136735  | 2949365 | 0.78122961  | 3168210 | 1.09280711  | experimental | ChemBridge | 5160120 |
| 1578 O17 | X | 2579   | 2600   | 0.86872563  | 1981   | 2000   | 0.43922095  | 2778466 | 0.38106544  | 2418266 | -0.50623791 | experimental | ChemBridge | 5213777 |
| 1578 O18 | X | 1578   | 1600   | -0.28660666 | 1500   | 1520   | -0.18371952 | 2141127 | -1.11127934 | 2052536 | -1.28605446 | experimental | ChemBridge | 5162110 |
| 1578 O19 | X | 2534   | 2560   | 0.81678761  | 1822   | 1840   | 0.23330092  | 2577046 | -0.09056439 | 2561237 | -0.2013924  | experimental | ChemBridge | 5214348 |
| 1578 O20 | X | 1692   | 1720   | -0.15503036 | 1582   | 1600   | -0.07752177 | 2530260 | -0.20011495 | 2379022 | -0.58991472 | experimental | ChemBridge | 5163090 |
| 1578 O21 | X | 4060   | 4080   | 2.57806341  | 1743   | 1760   | 0.13098845  | 2136340 | -1.12248822 | 2067303 | -1.25456797 | experimental | ChemBridge | 5214918 |
| 1578 O22 | X | 1809   | 1840   | -0.01991921 | 1458   | 1480   | -0.01991921 | 2535783 | -0.18127293 | 2472759 | -0.40125499 | experimental | ChemBridge | 5140012 |
| 1578 O23 | N | 2267   | 2640   | 0.50862206  | 2225   | 2520   | 0.75522402  | 2561629 | -0.12666368 | 2410781 | -0.52219757 | empty        |            |         |
| 1578 O24 | P | 120092 | 120800 | 136.499658  | 92211  | 93040  | 117.295602  | 2849519 | 0.54743777  | 2420822 | -0.50078796 | empty        |            |         |
| 1578 P01 | X | 1354   | 1360   | -0.54514256 | 1632   | 1640   | -0.01276704 | 2000756 | -1.43996146 | 2148341 | -1.08177719 | experimental | ChemBridge | 5140985 |
| 1578 P02 | X | 1463   | 1480   | -0.41933715 | 1659   | 1680   | 0.02220051  | 2360723 | -0.59708996 | 2267153 | -0.82844396 | experimental | ChemBridge | 5261469 |
| 1578 P03 | X | 2703   | 2720   | 1.01184371  | 3736   | 3760   | 2.71211188  | 1652411 | -2.25561976 | 1636025 | -2.17414722 | experimental | ChemBridge | 5142417 |
| 1578 P04 | X | 1023   | 1040   | -0.92717552 | 1822   | 1840   | 0.23330092  | 2331533 | -0.66543906 | 2473708 | -0.38802341 | experimental | ChemBridge | 5262448 |
| 1578 P05 | X | 1300   | 1320   | -0.58023475 | 1187   | 1200   | -0.58023475 | 2158745 | -1.07003637 | 1867397 | -0.38647873 | experimental | ChemBridge | 5141748 |
| 1578 P06 | X | 1463   | 1480   | -0.41933715 | 1219   | 1240   | -0.54764109 | 2292010 | 0.75798313  | 2116867 | -1.14888666 | experimental | ChemBridge | 5262929 |
| 1578 P07 | X | 1989   | 2000   | 0.18776054  | 2866   | 2880   | 1.58537963  | 2366266 | -0.5841109  | 2424926 | -0.49203733 | experimental | ChemBridge | 5144826 |
| 1578 P08 | X | 1025   | 1040   | -0.92486716 | 1821   | 1840   | 0.23200583  | 2430827 | -0.43293974 | 2693038 | 0.07963623  | experimental | ChemBridge | 5169047 |
| 1578 P09 | X | 1708   | 1720   | -0.13656351 | 2344   | 2360   | 0.90934027  | 1463882 | -2.697065   | 1332640 | -0.82103056 | experimental | ChemBridge | 5215319 |
| 1578 P10 | X | 1866   | 1880   | 0.04579663  | 2104   | 2120   | 0.59851758  | 2422490 | -0.45246103 | 2341167 | -0.67062988 | experimental | ChemBridge | 5169130 |
| 1578 P11 | X | 1705   | 1720   | -0.10024006 | 1786   | 1800   | 0.18667752  | 2331061 | -0.66654426 | 2679202 | 0.05013485  | experimental | ChemBridge | 5215549 |
| 1578 P12 | X | 1482   | 1490   | -0.48282557 | 1271   | 1240   | -0.4950509  | 2413859 | -0.84292439 | 2480787 | -0.37293583 | experimental | ChemBridge | 5172482 |
| 1578 P13 | X | 2947   | 2960   | -0.29342157 | 3306   | 3320   | 2.15522123  | 2948979 | -0.2919689  | 2671150 | -0.18025571 | experimental | ChemBridge | 5216449 |
| 1578 P14 | X | 1461   | 1480   | -0.4216455  | 1623   | 1640   | -0.02442289 | 1740781 | -2.04869925 | 1693542 | -2.05150837 | experimental | ChemBridge | 5173156 |
| 1578 P15 | X | 1461   | 1480   | -0.4216455  | 1174   | 1200   | -0.60592034 | 2657278 | 0.09730079  | 2389039 | -0.56855628 | experimental | ChemBridge | 5218437 |
| 1578 P16 | X | 3383   | 3400   | 1.79668483  | 4506   | 4520   | 3.70933468  | 1930682 | -1.60404143 | 1949254 | -1.50627432 | experimental | ChemBridge | 5173677 |
| 1578 P17 | X | 1659   | 1680   | -0.19311824 | 1617   | 1640   | -0.03219346 | 2536819 | -0.18475689 | 2535023 | -0.25728639 | experimental | ChemBridge | 5219425 |
| 1578 P18 | X | 1227   | 1240   | -0.69172318 | 1306   | 1320   | -0.43496786 | 2229218 | -0.90501212 | 2161019 | -1.05474492 | experimental | ChemBridge | 5267872 |
| 1578 P19 | X | 1344   | 1360   | -0.55668434 | 1547   | 1560   | -0.12285008 | 2431656 | -0.43099862 | 2526849 | -0.27471515 | experimental | ChemBridge | 5260655 |
| 1578 P20 | X | 1785   | 1800   | -0.04769179 | 1347   | 1360   | -0.38186899 | 2342279 | -0.64027704 | 2472056 | -0.39154584 | experimental | ChemBridge | 5258457 |
| 1578 P21 | X | 2058   | 2080   | 0.26739883  | 1226   | 1240   | -0.53857543 | 2740625 | 0.29245982  | 2155040 | -1.06749345 | experimental | ChemBridge | 5260896 |
| 1578 P22 | X | 1859   | 1880   | 0.03771739  | 1622   | 1640   | -0.02571799 | 2188092 | -1.00130965 | 2364578 | -0.6207125  | experimental | ChemBridge | 5269023 |
| 1578 P23 | N | 2851   | 3240   | 1.18266207  | 3021   | 3480   | 1.78611928  | 2425291 | -0.44590242 | 2302750 | -0.75254335 | empty        |            |         |
| 1578 P24 | P | 129321 | 129680 | 147.151568  | 154081 | 154360 | 197.423101  | 2166172 | -1.05263587 | 2211847 | -0.94636848 | empty        |            |         |
| 1579 A01 | X | 1277   | 1280   | 2.73060623  | 2238   | 2240   | 6.36814899  | 1729487 | -2.04993187 | 1897906 | -1.89843574 | experimental | ChemBridge | 5269250 |
| 1579 A02 | X | 393    | 400    | -0.48647896 | 391    | 400    | -0.55393133 | 1716657 | -2.07683976 | 1769518 | -2.16504838 | experimental | ChemBridge | 5265704 |
| 1579 A03 | X | 877    | 880    | 1.27491158  | 597    | 600    | 0.21810362  | 2413859 | -0.61462344 | 2167591 | -1.3384034  | experimental | ChemBridge | 5270350 |
| 1579 A04 | X | 235    | 240    | -1.06147835 | 436    | 440    | -0.38528292 | 2036397 | -1.40626072 | 2235733 | -1.19689859 | experimental | ChemBridge | 5214568 |
| 1579 A05 | X | 595    | 600    | 0.24864684  | 395    | 400    | -0.53894036 | 2778133 | 0.14935514  | 2412640 | -0.82953058 | experimental | ChemBridge | 5219626 |
| 1579 A06 | X | 996    | 1000   | 1.70798074  | 1077   | 1080   | 2.01702     | 2489134 | -0.45675192 | 2484038 | -0.68126431 | experimental | ChemBridge | 5147705 |
| 1579 A07 | X | 553    | 560    | 0.0957989   | 474    | 480    | -0.2428687  | 2489735 | -0.45549147 | 2287858 | -1.08865495 | experimental | ChemBridge | 5219754 |
| 1579 A08 | X | 1312   | 1320   | 0.28579952  | 634    | 640    | 0.35677009  | 2930509 | 0.46892777  | 3026650 | 0.44553276  | experimental | ChemBridge | 5150529 |
| 1579 A09 | X | 1874   | 1880   | 4.90323051  | 1155   | 1160   | 2.30934391  | 2457984 | -0.52208168 | 2072544 | -1.53577957 | experimental | ChemBridge | 5219830 |
| 1579 A10 | X | 312    | 320    | -0.78125713 | 274    | 280    | -0.99241719 | 2284129 | -0.88670143 | 2365309 | -0.51729563 | experimental | ChemBridge | 5151206 |
| 1579 A11 | X | 397    | 400    | 0.47192202  | 397    | 400    | -0.53144887 | 1697138 | -0.02811272 | 2621118 | -0.38200604 | experimental | ChemBridge | 5202214 |
| 1579 A12 | X | 516    | 520    | -0.03885285 | 315    | 320    | -0.83875975 | 2383899 | -0.67745745 | 2708167 | -0.21583432 | experimental | ChemBridge | 5152534 |
| 1579 A13 | X | 354    | 360    | -0.62840919 | 476    | 480    | -0.23537322 | 2355908 | -0.73616195 | 2692114 | -0.24917024 | experimental | ChemBridge | 5222116 |
| 1579 A14 | X | 393    | 400    | -0.48647896 | 315    | 320    | -0.83875975 | 2402188 | -0.6391006  | 2611082 | -0.41744264 | experimental | ChemBridge | 5173872 |
| 1579 A15 | X | 396    | 400    | -0.47556125 | 396    | 400    | -0.53519261 | 2224603 | -1.0115431  |         |             |              |            |         |



|          |   |  |      |      |             |      |      |             |          |             |            |             |   |              |            |         |
|----------|---|--|------|------|-------------|------|------|-------------|----------|-------------|------------|-------------|---|--------------|------------|---------|
| 1579 B07 | X |  | 194  | 200  | -1.21068706 | 235  | 240  | -1.13857915 | 2704722  | -0.00460707 | 3070665    | 0.53693504  | W | experimental | ChemBridge | 5228174 |
| 1579 B08 | X |  | 473  | 480  | -0.19534003 | 514  | 520  | -0.092959   | 3092872  | 0.80944576  | 2910233    | 0.20377929  |   | experimental | ChemBridge | 5236198 |
| 1579 B09 | X |  | 471  | 480  | -0.2026185  | 793  | 800  | 0.95266114  | 3008069  | 0.63159153  | 3264861    | 0.94020567  |   | experimental | ChemBridge | 5229219 |
| 1579 B10 | X |  | 516  | 520  | -0.03865295 | 355  | 360  | -0.68885005 | 2855522  | 0.31166027  | 2833687    | 0.25248425  |   | experimental | ChemBridge | 5237897 |
| 1579 B11 | X |  | 355  | 360  | -0.62476995 | 475  | 480  | -0.23912096 | 2610673  | -0.18185261 | 2944193    | 0.07430119  |   | experimental | ChemBridge | 5248474 |
| 1579 B12 | X |  | 554  | 560  | 0.094943814 | 675  | 680  | 0.51042753  | 2412977  | -0.61647322 | 2478852    | -0.69203365 |   | experimental | ChemBridge | 5238420 |
| 1579 B13 | X |  | 992  | 1000 | 1.69342379  | 713  | 720  | 0.65284174  | 2901163  | 0.40738147  | 3421559    | 1.26560733  |   | experimental | ChemBridge | 5249345 |
| 1579 B14 | X |  | 1513 | 1520 | 3.58946608  | 874  | 880  | 1.25622828  | 2413567  | -0.61523584 | 2380535    | -0.89620036 |   | experimental | ChemBridge | 5240462 |
| 1579 B15 | X |  | 472  | 480  | -0.19897927 | 474  | 480  | -0.2428687  | 2946283  | 0.50201     | 2726647    | -0.17745844 |   | experimental | ChemBridge | 5251390 |
| 1579 B16 | X |  | 474  | 480  | -0.19170079 | 273  | 280  | -0.99616494 | 2696649  | -0.02153828 | 2665253    | -0.30495024 |   | experimental | ChemBridge | 5240581 |
| 1579 B17 | X |  | 594  | 600  | 0.2450076   | 475  | 480  | -0.23912096 | 3163854  | 0.95831372  | 5200085    | -0.64794085 |   | experimental | ChemBridge | 5254762 |
| 1579 B18 | X |  | 431  | 440  | -0.34818797 | 271  | 280  | -1.00366042 | 2814721  | 0.22608982  | 2741717    | -0.14574851 |   | experimental | ChemBridge | 5240775 |
| 1579 B19 | X |  | 587  | 600  | 0.21953295  | 1110 | 1120 | 2.1406955   | 4405861  | 3.56312971  | 4618570    | 3.75134021  |   | experimental | ChemBridge | 5255970 |
| 1579 B20 | X |  | 1392 | 1400 | 3.14911845  | 992  | 1000 | 1.69846189  | 3036598  | 0.69142436  | 2805599    | -0.01350541 |   | experimental | ChemBridge | 5271431 |
| 1579 B21 | X |  | 348  | 360  | -0.65024461 | 351  | 360  | -0.70384102 | 2575382  | -0.27586714 | 2617317    | -0.40449493 |   | experimental | ChemBridge | 5230972 |
| 1579 B22 | X |  | 1553 | 1560 | 3.73503555  | 1195 | 1200 | 2.45925361  | 2768187  | 0.12849576  | 2732914    | -0.16444429 |   | experimental | ChemBridge | 5272779 |
| 1579 B23 | N |  | 623  | 640  | 0.35054547  | 432  | 440  | -0.40027389 | 2746565  | 0.08314872  | 2437878    | -0.77712093 |   | empty        |            |         |
| 1579 B24 | P |  | 1262 | 2040 | 2.67601769  | 395  | 400  | -0.53894036 | 2380423  | -0.68474754 | 2186973    | -1.29815441 |   | experimental | ChemBridge | 5269399 |
| 1579 C01 | X |  | 597  | 600  | 0.2592531   | 397  | 400  | -0.53144487 | 2231921  | -0.99619537 | 2463021    | -0.72490856 |   | experimental | ChemBridge | 5265746 |
| 1579 C02 | X |  | 275  | 280  | -0.91590889 | 474  | 480  | -0.2428687  | 2707999  | 0.00226566  | 3365156    | 1.14856299  |   | experimental | ChemBridge | 5257407 |
| 1579 C03 | X |  | 316  | 320  | -0.76670018 | 516  | 520  | -0.08546352 | 2500759  | -0.43237123 | 3104688    | 0.60758776  |   | experimental | ChemBridge | 5260746 |
| 1579 C04 | X |  | 276  | 280  | -0.91226965 | 355  | 360  | -0.68885005 | 2742907  | 0.07547693  | 2380575    | -0.89611729 |   | experimental | ChemBridge | 5145962 |
| 1579 C05 | X |  | 396  | 400  | -0.47556125 | 356  | 360  | -0.68510231 | 2744056  | 0.07788669  | 2761950    | -0.10414765 |   | experimental | ChemBridge | 5219646 |
| 1579 C06 | X |  | 275  | 280  | -0.91590889 | 316  | 320  | -0.83501201 | 3217787  | 1.07142544  | 3313651    | 1.04152379  |   | experimental | ChemBridge | 5147906 |
| 1579 C07 | X |  | 557  | 560  | 0.11035585  | 436  | 440  | -0.38526292 | 3290923  | 1.2248109   | 2998444    | 0.38695971  |   | experimental | ChemBridge | 5219756 |
| 1579 C08 | X |  | 474  | 480  | -0.1710079  | 354  | 360  | -0.69259728 | 3177115  | -0.98613554 | 3666369    | 0.48357113  |   | experimental | ChemBridge | 5234149 |
| 1579 C09 | X |  | 395  | 400  | -0.47920049 | 475  | 480  | -0.23912096 | 2323578  | 1.10954333  | 3035823    | 0.46458156  |   | experimental | ChemBridge | 5219940 |
| 1579 C10 | X |  | 355  | 360  | -0.62476995 | 275  | 280  | -0.98866945 | 2224801  | -1.01112788 | 2852766    | 0.08444236  |   | experimental | ChemBridge | 5151224 |
| 1579 C11 | X |  | 395  | 400  | -0.47920049 | 435  | 440  | -0.38903066 | 2442888  | -0.55374197 | 2816432    | 0.00899058  |   | experimental | ChemBridge | 5220215 |
| 1579 C12 | X |  | 274  | 280  | -0.91954812 | 353  | 360  | -0.69634554 | 2474037  | -0.48841431 | 3537592    | 1.50656338  |   | experimental | ChemBridge | 5152539 |
| 1579 C13 | X |  | 394  | 400  | -0.48283973 | 394  | 400  | -0.5426881  | 2712581  | 0.01187532  | 3313354    | 1.04090704  |   | experimental | ChemBridge | 5222308 |
| 1579 C14 | X |  | 392  | 400  | -0.4901182  | 554  | 560  | 0.05695069  | 3559840  | 1.78880072  | 3209073    | 0.82435538  |   | experimental | ChemBridge | 5173909 |
| 1579 C15 | X |  | 393  | 400  | -0.48647896 | 472  | 480  | -0.25036419 | 3602027  | 1.87727798  | 3801027    | 2.05361687  |   | experimental | ChemBridge | 5263084 |
| 1579 C16 | N |  | 674  | 680  | 0.53613254  | 954  | 960  | 0.73004783  | 1152327  | 0.8646625   | 1152327    | 0.8646625   |   | experimental | ChemBridge | 5174463 |
| 1579 C17 | X |  | 632  | 640  | 0.3832986   | 593  | 600  | 0.20311265  | 2692616  | -0.02999655 | 2827919    | 0.03284467  |   | experimental | ChemBridge | 5263844 |
| 1579 C18 | X |  | 673  | 680  | 0.5325073   | 593  | 600  | 0.20311265  | 2036727  | -1.40556862 | 2805803    | -1.50974088 |   | experimental | ChemBridge | 5175091 |
| 1579 C19 | X |  | 1153 | 1160 | 2.27934089  | 873  | 880  | 1.25248054  | 2635417  | -0.14995792 | 1987204    | -1.71299803 |   | experimental | ChemBridge | 5264570 |
| 1579 C20 | X |  | 549  | 560  | 0.08124196  | 352  | 360  | -0.70009328 | 3360550  | 1.37083707  | 2770851    | -0.08566368 |   | experimental | ChemBridge | 5175698 |
| 1579 C21 | X |  | 511  | 520  | -0.05704904 | 274  | 280  | -0.99241719 | 2638743  | -0.14298242 | 2688578    | -0.25651316 |   | experimental | ChemBridge | 5265368 |
| 1579 C22 | X |  | 592  | 600  | 0.23772913  | 433  | 440  | -0.39652614 | 2867372  | 0.33651284  | 2740882    | -0.14789781 |   | experimental | ChemBridge | 5176658 |
| 1579 C23 | N |  | 593  | 600  | -0.48647896 | 396  | 400  | -0.53613254 | 2531723  | 0.36743157  | 3666369    | 0.48357113  |   | empty        |            |         |
| 1579 C24 | X |  | 591  | 600  | 0.23408989  | 396  | 400  | -0.53519261 | 2717096  | -1.06932257 | 2678762    | -0.31635294 |   | empty        |            |         |
| 1579 D01 | X |  | 235  | 240  | -1.06147835 | 396  | 400  | -0.53519261 | 2261770  | -0.93359415 | 2371122    | -0.91574755 |   | experimental | ChemBridge | 5224601 |
| 1579 D02 | X |  | 515  | 520  | -0.04249209 | 555  | 560  | 0.06069844  | 2797603  | 0.19018886  | 2956280    | 0.29940125  |   | experimental | ChemBridge | 5232534 |
| 1579 D03 | X |  | 394  | 400  | -0.48283973 | 393  | 400  | -0.54643584 | 2868935  | 0.33979086  | 2920656    | 0.22542386  |   | experimental | ChemBridge | 5226242 |
| 1579 D04 | X |  | 315  | 320  | -0.77033942 | 355  | 360  | -0.68885005 | 2720020  | 0.02747686  | 2898278    | 0.17895334  |   | experimental | ChemBridge | 5233964 |
| 1579 D05 | X |  | 516  | 520  | -0.03865295 | 516  | 520  | -0.08546352 | 2947824  | 0.50524188  | 2913284    | 0.21011504  |   | experimental | ChemBridge | 5226796 |
| 1579 D06 | X |  | 275  | 280  | -0.786018   | 354  | 360  | -0.98866945 | 2594706  | 0.23339662  | 3021930    | 0.43371113  |   | experimental | ChemBridge | 5234149 |
| 1579 D07 | X |  | 195  | 200  | -1.20704782 | 396  | 400  | -0.53519261 | 2841095  | 0.28140305  | 2818030    | -0.41197906 |   | experimental | ChemBridge | 5228174 |
| 1579 D08 | X |  | 556  | 560  | 0.10671661  | 475  | 480  | -0.23912096 | 3103469  | 0.83167047  | 3031663    | 0.45594284  |   | experimental | ChemBridge | 5236221 |
| 1579 D09 | X |  | 354  | 360  | -0.62840919 | 395  | 400  | -0.53894036 | 3069604  | 0.76064664  | 3077524    | 0.55117855  |   | experimental | ChemBridge | 5229359 |
| 1579 D10 | X |  | 555  | 560  | 0.10307737  | 475  | 480  | -0.23912096 | 3046670  | 0.712548    | 3123506    | 0.64666553  |   | experimental | ChemBridge | 5238120 |
| 1579 D11 | X |  | 554  | 560  | 0.09943814  | 633  | 640  | 0.35302235  | 2900761  | 0.40653837  | 2861616    | 0.10282042  |   | experimental | ChemBridge | 5248554 |
| 1579 D12 | X |  | 716  | 720  | 0.68899448  | 555  | 560  | 0.05695069  | 33279439 | 3352485     | 1.12216712 |             |   | experimental | ChemBridge | 5238436 |
| 1579 D13 | X |  | 353  | 360  | -0.63204843 | 494  | 500  | -0.05695069 | 3391296  | 1.43531954  | 2864365    | 0.10852904  |   | experimental | ChemBridge | 5245691 |
| 1579 D14 | X |  | 514  | 520  | -0.04613133 | 352  | 360  | -0.70009328 | 2729640  | 0.04765254  | 3432523    | 1.28837536  |   | experimental | ChemBridge | 5240463 |
| 1579 D15 | X |  | 875  | 880  | 1.2676331   | 915  | 920  | 1.40988572  | 3462052  | 1.58371351  | 3313057    | 1.04029028  |   | experimental | ChemBridge | 5251526 |
| 1579 D16 | X |  | 392  | 400  | -0.4901182  | 632  | 640  | 0.34927461  | 2910512  | 0.42698879  | 3142582    | 0.68627907  |   | experimental | ChemBridge | 5240604 |
| 1579 D17 | X |  | 795  | 800  | 0.97649417  | 514  | 520  | -0.092959   | 2404600  | -0.634042   | 2497628    | -0.65304309 |   | experimental | ChemBridge | 5254941 |
| 1579 D18 | X |  | 313  | 320  | -0.77761789 | 594  | 600  | 0.20686039  | 2720797  | 0.02910644  | 3000371    | 0.39096135  |   | experimental | ChemBridge | 5240801 |
| 1579 D19 | X |  | 512  | 520  | -0.0534098  | 392  | 400  | -0.55018358 | 2554583  | -0.31948812 | 2819512    | 0.01538656  |   | experimental | ChemBridge | 5256075 |
| 1579 D20 | X |  | 791  | 800  | 0.96193722  | 674  | 680  | 0.50667979  | 2628882  | -0.16366354 | 2669740    | -0.29563246 |   | experimental | ChemBridge | 5271443 |
| 1579 D21 | X |  | 1674 | 1680 | 4.17538318  | 955  | 960  | 1.55979542  | 2609602  | -0.20409878 | 2774165    | -0.07878178 |   | experimental | ChemBridge | 5231049 |
| 1579 D22 | X |  | 391  | 400  | -0.49375744 | 354  | 360  | -0.69259728 | 2820371  | 0.23793936  | 2618458    | -0.40212551 |   | experimental | ChemBridge | 5272969 |
| 1579 D23 | N |  | 474  | 480  | -0.19170079 | 553  | 560  | 0.05320295  | 2498051  | -0.43805062 | 2775804    | -0.07536782 |   | empty        |            |         |
| 1579 D24 | P |  | 513  | 520  | -0.04977056 | 516  | 520  | -0.08546352 | 2458504  | -0.5209911  | 2553048    | -0.537957   |   | empty        |            |         |
| 1579 E01 | X |  | 517  | 520  | -0.03521362 | 316  | 320  | -0.83501201 | 2286783  | -0.8811353  | 2498786    | -0.65063837 |   | experimental | ChemBridge | 5269447 |
| 1579 E02 | X |  | 633  | 640  | 0.38693783  | 513  | 520  | -0.09670675 | 3064777  | 0.75052315  | 2952458    | 0.29146442  |   | experimental | ChemBridge | 5265763 |
| 1579 E03 | X |  | 875  | 880  | 1.2676331   | 1075 | 1080 | 2.00952451  | 2449214  | -0.43561151 | 2964300    | 0.31611801  |   | experimental | ChemBridge | 5270430 |
| 1579 E04 | X |  | 475  | 480  | -0.18806156 | 354  | 360  | -0.69259728 | 3042314  | 0.70341232  | 3145113    | 0.70378703  |   | experimental | ChemBridge | 5145143 |
| 1579 E05 | X |  | 395  | 400  | -0.47920049 | 395  | 400  | -0.53894036 | 3064511  | 0.74996527  | 2785017    | -0.0562463  |   | experimental | ChemBridge | 5219672 |
| 1579 E06 | X |  | 356  | 360  | -0.62113072 | 516  | 520  | -0.08546352 | 3688453  | 2.05853607  | 3238768    | 0.88602051  |   | experimental | ChemBridge | 5148699 |
| 1579 E07 | X |  | 277  | 280  | -0.90863041 | 236  | 240  | -1.13483141 | 3135022  | 0.89784542  |            |             |   |              |            |         |

|          |   |        |            |             |      |      |             |          |             |         |             |              |            |         |
|----------|---|--------|------------|-------------|------|------|-------------|----------|-------------|---------|-------------|--------------|------------|---------|
| 1579 F01 | X | 277    | 280        | -0.90863041 | 356  | 360  | -0.68510231 | 2729212  | 0.04675491  | 2568980 | -0.50487235 | experimental | ChemBridge | 5224761 |
| 1579 F02 | X | 355    | 360        | -0.62476995 | 516  | 520  | -0.08546352 | 2826588  | 0.25097804  | 2831366 | 0.04000277  | experimental | ChemBridge | 5232548 |
| 1579 F03 | X | 315    | 320        | -0.77033942 | 353  | 360  | -0.69634554 | 3510438  | 1.68519171  | 3115985 | 0.6310473   | experimental | ChemBridge | 5226263 |
| 1579 F04 | X | 276    | 280        | -0.91226695 | 355  | 360  | -0.68855005 | 2858948  | 0.31884549  | 2822644 | 0.02189052  | experimental | ChemBridge | 5234050 |
| 1579 F05 | X | 355    | 360        | -0.62476995 | 436  | 440  | -0.3528292  | 2348671  | -0.75133985 | 2714041 | -0.20362627 | experimental | ChemBridge | 5226860 |
| 1579 F06 | X | 277    | 280        | -0.90863041 | 396  | 400  | -0.53519261 | 2978302  | 0.56916228  | 3481143 | 1.38934045  | experimental | ChemBridge | 5234207 |
| 1579 F07 | X | 34     | 40         | -1.79296492 | 35   | 40   | -1.88812764 | 1009459  | -3.56002033 | 1031243 | -3.69816248 | experimental | ChemBridge | 5228304 |
| 1579 F08 | X | 435    | 440        | -0.33363102 | 276  | 280  | -0.98492171 | 2893659  | 0.39164361  | 3239717 | 0.88799122  | experimental | ChemBridge | 5237126 |
| 1579 F09 | X | 672    | 680        | 0.52886806  | 435  | 440  | -0.38903066 | 3238644  | 1.11516806  | 3039809 | 0.47285896  | experimental | ChemBridge | 5229704 |
| 1579 F10 | X | 795    | 800        | 0.97649417  | 556  | 560  | 0.06444618  | 2748945  | 0.08814021  | 2864084 | 0.10794551  | experimental | ChemBridge | 5238177 |
| 1579 F11 | X | 355    | 360        | -0.62476995 | 354  | 360  | -0.6925978  | 3320656  | 1.08716884  | 3503209 | 0.50068562  | experimental | ChemBridge | 5248611 |
| 1579 F12 | X | 515    | 520        | -0.04249209 | 875  | 880  | 1.25997602  | 3418773  | 1.49294605  | 2845455 | 0.27712954  | experimental | ChemBridge | 5238482 |
| 1579 F13 | X | 873    | 880        | 1.26035463  | 793  | 800  | 0.95266114  | 3094586  | 0.81304407  | 2876507 | 0.13374332  | experimental | ChemBridge | 5250120 |
| 1579 F14 | X | 594    | 600        | 0.2450076   | 632  | 640  | 0.34927461  | 3539873  | 1.74692466  | 2779953 | -0.06676232 | experimental | ChemBridge | 5240468 |
| 1579 F15 | X | 475    | 480        | -0.18806156 | 675  | 680  | 0.51042753  | 2836948  | 0.27270569  | 3677811 | 1.79774448  | experimental | ChemBridge | 5252736 |
| 1579 F16 | X | 434    | 440        | -0.33727026 | 514  | 520  | -0.092959   | 2802527  | 0.20051579  | 3019665 | 0.43102759  | experimental | ChemBridge | 5240637 |
| 1579 F17 | X | 513    | 520        | -0.04977056 | 514  | 520  | -0.092959   | 2006424  | -1.469122   | 2406264 | -0.84277109 | experimental | ChemBridge | 5255506 |
| 1579 F18 | X | 675    | 680        | 0.53978577  | 594  | 600  | 0.20686039  | 2449155  | -0.54059842 | 2585560 | -0.47044204 | experimental | ChemBridge | 5240810 |
| 1579 F19 | X | 233    | 240        | -1.06875683 | 514  | 520  | -0.092959   | 2691333  | -0.03268733 | 3327516 | 1.07031608  | experimental | ChemBridge | 5256107 |
| 1579 F20 | X | 553    | 560        | 0.0957989   | 392  | 400  | -0.55018358 | 2601523  | -0.22104257 | 2907661 | 0.19843823  | experimental | ChemBridge | 5271547 |
| 1579 F21 | X | 1154   | 1160       | 2.28298013  | 1354 | 1360 | 3.05514466  | 3038453  | 0.69531478  | 3855556 | 0.09023612  | experimental | ChemBridge | 5231058 |
| 1579 F22 | X | 631    | 640        | 0.37965936  | 514  | 520  | -0.092959   | 2574536  | -0.27764142 | 2648962 | -0.3387804  | experimental | ChemBridge | 5273140 |
| 1579 F23 | N | 544    | 1040       | 0.06304577  | 474  | 480  | -0.2428687  | 3097913  | 0.82001807  | 2912272 | 0.20801351  | empty        |            |         |
| 1579 F24 | P | 169228 | 613.944041 |             | 356  | 360  | -0.68510231 | 2439514  | -0.56081814 | 2408325 | -0.83849118 | empty        |            |         |
| 1579 G01 | X | 236    | 240        | -1.05783912 | 395  | 400  | -0.53894036 | 2302707  | -0.84773847 | 2566254 | -0.5105332  | experimental | ChemBridge | 5269569 |
| 1579 G02 | X | 356    | 360        | -0.62112695 | 435  | 440  | -1.28446885 | 1926257  | -1.6330588  | 1862562 | -1.71461212 | experimental | ChemBridge | 5234825 |
| 1579 G03 | X | 276    | 280        | -0.91226695 | 396  | 400  | -0.53519261 | 2325203  | -0.8219363  | 3167621 | 0.73829001  | experimental | ChemBridge | 5270838 |
| 1579 G04 | X | 275    | 280        | -0.91590889 | 395  | 400  | -0.53894036 | 2374769  | -0.69660547 | 3216397 | 0.83956452  | experimental | ChemBridge | 5146013 |
| 1579 G05 | X | 716    | 720        | 0.68899448  | 356  | 360  | -0.68510231 | 2621219  | -0.17973487 | 2831074 | 0.0393964   | experimental | ChemBridge | 5219673 |
| 1579 G06 | X | 433    | 440        | -0.3409095  | 274  | 280  | -0.99241719 | 3111058  | 0.8475866   | 3222602 | 0.85244993  | experimental | ChemBridge | 5148700 |
| 1579 G07 | X | 956    | 960        | 1.56241127  | 877  | 880  | 1.26747151  | 3725823  | 2.13691081  | 2936211 | 0.25772563  | experimental | ChemBridge | 5219807 |
| 1579 G08 | X | 633    | 640        | 0.38693783  | 474  | 480  | -0.2428687  | 2651564  | -0.11609341 | 3105361 | 0.60898533  | experimental | ChemBridge | 5150868 |
| 1579 G09 | X | 672    | 680        | 0.52886806  | 634  | 640  | 0.35677009  | 2509957  | -0.4130806  | 2753846 | -0.12097655 | experimental | ChemBridge | 5220010 |
| 1579 G10 | X | 434    | 440        | -0.3454873  | 675  | 680  | -0.92507483 | 48425074 | 0.2680488   | 3296268 | 0.31804873  | experimental | ChemBridge | 5151174 |
| 1579 G11 | X | 195    | 200        | -1.20704782 | 114  | 120  | -1.59205599 | 1383172  | -2.77624569 | 1357594 | -3.02045659 | experimental | ChemBridge | 5220597 |
| 1579 G12 | X | 275    | 280        | -0.91590889 | 395  | 400  | -0.53894036 | 2551086  | -0.32682225 | 2996922 | 0.3837991   | experimental | ChemBridge | 5152636 |
| 1579 G13 | X | 633    | 640        | 0.38693783  | 431  | 440  | -0.40402163 | 2646626  | -0.1264497  | 3250462 | 0.91030447  | experimental | ChemBridge | 5222726 |
| 1579 G14 | X | 274    | 280        | -0.91954812 | 475  | 480  | -0.23912096 | 2673759  | -0.06954464 | 3373506 | 1.16581968  | experimental | ChemBridge | 5174382 |
| 1579 G15 | X | 355    | 360        | -0.62476995 | 353  | 360  | -0.69634554 | 3400992  | 1.4556546   | 2960344 | 0.30784062  | experimental | ChemBridge | 5263105 |
| 1579 G16 | X | 594    | 600        | 0.2450076   | 714  | 720  | 0.65658949  | 2791437  | 0.17725133  | 4041265 | 2.55249908  | experimental | ChemBridge | 5147689 |
| 1579 G17 | X | 640    | 640        | 0.39057707  | 714  | 714  | 0.65658949  | 2945799  | 0.5009893   | 3462083 | 1.28472161  | experimental | ChemBridge | 5264008 |
| 1579 G18 | X | 634    | 640        | 0.39057707  | 354  | 360  | -0.6925978  | 2519668  | -0.39271408 | 2658431 | -0.31911992 | experimental | ChemBridge | 5157175 |
| 1579 G19 | X | 514    | 520        | -0.04613133 | 514  | 520  | -0.092959   | 2947074  | 0.50366894  | 2867013 | 0.11402792  | experimental | ChemBridge | 5264723 |
| 1579 G20 | X | 394    | 400        | -0.48283973 | 354  | 360  | -0.6925978  | 2894343  | 0.39307813  | 3125421 | 0.65064225  | experimental | ChemBridge | 5175910 |
| 1579 G21 | X | 432    | 440        | -0.34454873 | 672  | 680  | 0.4991843   | 2880253  | 0.36352769  | 2985871 | 0.36085041  | experimental | ChemBridge | 5265459 |
| 1579 G22 | X | 632    | 640        | -1.15357012 | 231  | 240  | -1.15357012 | 2693923  | -0.02725542 | 2467017 | -0.7166104  | experimental | ChemBridge | 5259588 |
| 1579 G23 | N | 640    | 640        | 0.37238089  | 476  | 480  | -0.23537322 | 2685023  | -0.04592107 | 2610552 | -0.41854324 | empty        |            |         |
| 1579 G24 | P | 1147   | 1640       | 2.25705447  | 1236 | 1240 | 2.25705447  | 2393303  | -0.65773478 | 2723269 | -0.20780446 | empty        |            |         |
| 1579 H01 | X | 827    | 880        | 1.27491158  | 1236 | 1240 | 2.25705447  | 2072725  | 0.275007133 | 2257216 | 1.82288664  | experimental | ChemBridge | 5225099 |
| 1579 H02 | X | 354    | 360        | -0.62840919 | 514  | 520  | -0.092959   | 2748900  | 0.08804583  | 2751588 | -0.12566555 | experimental | ChemBridge | 5233087 |
| 1579 H03 | X | 356    | 360        | -0.62113072 | 275  | 280  | -0.98866945 | 2655588  | -0.10765402 | 2970247 | 0.32840535  | experimental | ChemBridge | 5226315 |
| 1579 H04 | X | 476    | 480        | -0.18442232 | 476  | 480  | -0.23537322 | 2530851  | -0.36926038 | 3096545 | 0.59067787  | experimental | ChemBridge | 5234058 |
| 1579 H05 | X | 354    | 360        | -0.62840919 | 274  | 280  | -0.99241719 | 1585604  | -2.35169244 | 1704069 | -2.30096086 | experimental | ChemBridge | 5227184 |
| 1579 H06 | X | 395    | 400        | -0.47920049 | 596  | 600  | 0.21435588  | 2959964  | 0.53070266  | 3371196 | 1.16102269  | experimental | ChemBridge | 5234414 |
| 1579 H07 | X | 273    | 280        | -0.92318736 | 312  | 320  | -0.85000298 | 2924823  | 0.45700273  | 2887135 | 0.1558136   | experimental | ChemBridge | 5228398 |
| 1579 H08 | X | 434    | 440        | -0.33727026 | 434  | 440  | -0.3927784  | 2823699  | 0.24491905  | 3632968 | 1.70462276  | experimental | ChemBridge | 5237184 |
| 1579 H09 | X | 873    | 880        | 1.26035463  | 753  | 760  | 0.80275144  | 2687122  | -0.04151891 | 2732294 | -0.16573179 | experimental | ChemBridge | 5229753 |
| 1579 H10 | X | 953    | 960        | 1.55149356  | 833  | 840  | 1.10257084  | 2177389  | -1.11056334 | 2079649 | -1.52102521 | experimental | ChemBridge | 5238197 |
| 1579 H11 | X | 515    | 520        | -0.04249209 | 915  | 920  | -0.04988572 | 2996386  | 0.6078092   | 3458761 | 1.34286162  | experimental | ChemBridge | 5248627 |
| 1579 H12 | X | 393    | 400        | -0.48647896 | 350  | 360  | -0.70758877 | 2796614  | 0.18811467  | 3073276 | 0.54235708  | experimental | ChemBridge | 5238490 |
| 1579 H13 | X | 955    | 960        | 1.55877203  | 1355 | 1360 | 3.0588924   | 2911125  | 0.42827441  | 2505365 | -0.63697631 | experimental | ChemBridge | 5250809 |
| 1579 H14 | X | 313    | 320        | -0.77761789 | 392  | 400  | -0.55018358 | 2915198  | 0.43681656  | 3472374 | 1.3711306   | experimental | ChemBridge | 5240469 |
| 1579 H15 | X | 395    | 400        | -0.47920049 | 435  | 440  | -0.38903066 | 3077055  | 0.77627335  | 3463904 | 1.35354166  | experimental | ChemBridge | 5225258 |
| 1579 H16 | X | 635    | 640        | 0.39421631  | 514  | 520  | -0.092959   | 2617103  | -0.18836721 | 3241184 | 0.89103762  | experimental | ChemBridge | 5240660 |
| 1579 H17 | X | 234    | 240        | -1.06511759 | 314  | 320  | -0.84250749 | 2334376  | -0.78132023 | 2116946 | -1.44357364 | experimental | ChemBridge | 5255544 |
| 1579 H18 | X | 351    | 360        | -0.6393269  | 353  | 360  | -0.69634554 | 2894423  | 0.39324592  | 3144204 | 0.68964734  | experimental | ChemBridge | 5240812 |
| 1579 H19 | X | 715    | 720        | 0.68535524  | 835  | 840  | 1.11006632  | 2830624  | 0.2594426   | 3092572 | 0.58242748  | experimental | ChemBridge | 5256116 |
| 1579 H20 | X | 513    | 520        | -0.04977056 | 434  | 440  | -0.3927784  | 2824433  | 0.24645844  | 3000828 | 0.39191037  | experimental | ChemBridge | 5271705 |
| 1579 H21 | X | 633    | 640        | 0.38693783  | 631  | 640  | 0.34552686  | 2407582  | -0.62778796 | 2709372 | -0.21333199 | experimental | ChemBridge | 5231125 |
| 1579 H22 | X | 952    | 960        | 1.54785432  | 1555 | 1560 | 3.80844989  | 2201231  | -1.0675038  | 2923269 | 0.86572809  | experimental | ChemBridge | 5273335 |
| 1579 H23 | X | 553    | 560        | 0.0957989   | 311  | 320  | -0.85375072 | 2111776  | 0.84909243  | 2685780 | -0.2623253  | experimental | ChemBridge | 5273335 |
| 1579 H24 | P | 432    | 440        | -0.34454873 | 597  | 600  | 0.21810362  | 2473028  | -0.49053045 | 2570961 | -0.50075857 | empty        |            |         |
| 1579 I01 | X | 512    | 520        | -0.0534098  | 393  | 400  | -0.54643584 | 2429221  | -0.58240527 | 2816668 | 0.00948066  | experimental | ChemBridge | 5269773 |
| 1579 I02 | X | 435    | 440        | -0.33363102 | 395  | 400  | -0.53894036 | 2691739  | -0.03183585 | 2781833 | -0.06285828 | experimental | ChemBridge | 5266089 |
| 1579 I03 | X | 395    | 400        | -0.47920049 | 395  | 400  | -0.53894036 | 2518249  | -0.3956901  | 3307446 | 1.02863839  | experimental | ChemBridge | 5270526 |
| 1579 I04 | X | 395    | 400        | -0.47920049 | 514  | 520  | -0.092959   | 2929382  | 0.46656415  | 3412338 | 1.24645885  | experimental | ChemBridge | 5146515 |
| 1579 I05 | X | 595    | 600        | 0.24864684  | 596  |      |             |          |             |         |             |              |            |         |

|          |   |      |      |             |      |      |             |           |             |         |             |              |            |         |
|----------|---|------|------|-------------|------|------|-------------|-----------|-------------|---------|-------------|--------------|------------|---------|
| 1579 I19 | X | 349  | 360  | -0.64660537 | 473  | 480  | -0.24661644 | 2749959   | 0.09026684  | 2853826 | 0.08664358  | experimental | ChemBridge | 5265083 |
| 1579 I20 | X | 754  | 760  | 0.82728547  | 393  | 400  | -0.54643584 | 2866605   | 0.33490424  | 2784988 | -0.05630655 | experimental | ChemBridge | 5175983 |
| 1579 I21 | X | 391  | 400  | -0.49375744 | 392  | 400  | -0.55018358 | 2404119   | -0.63505078 | 2237004 | -1.19417615 | experimental | ChemBridge | 5265619 |
| 1579 I22 | X | 873  | 880  | 1.26035463  | 672  | 680  | -0.4991843  | 2293692   | -0.6666543  | 2580003 | -0.48198188 | experimental | ChemBridge | 5259601 |
| 1579 I23 | N | 353  | 360  | -0.63204843 | 554  | 560  | 0.05695069  | 2552920   | -0.36492111 | 2604027 | -0.44019197 | empty        |            |         |
| 1579 I24 | P | 396  | 400  | -0.47556125 | 435  | 440  | -0.38903066 | 2424427   | -0.59245955 | 2466877 | -0.17295348 | empty        |            |         |
| 1579 J01 | X | 1596 | 1600 | 3.89152273  | 917  | 920  | 1.4173812   | 2352814   | -0.74265089 | 2204258 | -1.26222601 | experimental | ChemBridge | 5225597 |
| 1579 J02 | X | 352  | 360  | -0.63568766 | 394  | 400  | -0.5426881  | 2810061   | 0.21631657  | 3045460 | 0.48459392  | experimental | ChemBridge | 5233731 |
| 1579 J03 | X | 434  | 440  | -0.33277026 | 434  | 440  | -0.3927784  | 3188148   | 1.00926464  | 2988884 | 0.36710726  | experimental | ChemBridge | 5226712 |
| 1579 J04 | X | 231  | 240  | -1.0760353  | 470  | 480  | -0.25785967 | 2852220   | 0.3047351   | 3312785 | 1.03972544  | experimental | ChemBridge | 5234059 |
| 1579 J05 | X | 354  | 360  | -0.62840919 | 353  | 360  | -0.69634554 | 3125948   | 0.87881485  | 3079063 | 0.55437446  | experimental | ChemBridge | 5232766 |
| 1579 J06 | X | 875  | 880  | 1.26035371  | 834  | 840  | 1.10631858  | 3378543   | 1.40857313  | 3744916 | 0.62612572  | experimental | ChemBridge | 5234833 |
| 1579 J07 | X | 514  | 520  | -0.04613133 | 591  | 600  | 0.19561717  | 3510735   | 1.68581459  | 2862171 | 0.10397294  | experimental | ChemBridge | 5228552 |
| 1579 J08 | X | 356  | 360  | -0.62113072 | 555  | 560  | 0.06069844  | 3053932   | 0.72777832  | 2970473 | 0.32887467  | experimental | ChemBridge | 5237501 |
| 1579 J09 | X | 315  | 320  | -0.77033942 | 274  | 280  | -0.99241719 | 3424095   | 1.50410768  | 3099961 | 0.59777116  | experimental | ChemBridge | 5229970 |
| 1579 J10 | X | 516  | 520  | -0.03885285 | 674  | 680  | 0.50667979  | 2874722   | 0.35192773  | 3043637 | 0.48080824  | experimental | ChemBridge | 5238266 |
| 1579 J11 | X | 394  | 400  | -0.48283973 | 573  | 600  | 0.20311265  | 2576943   | -0.27259331 | 3003055 | 0.39653499  | experimental | ChemBridge | 5248694 |
| 1579 J12 | X | 353  | 360  | -0.63204843 | 292  | 280  | -0.99991268 | 2822461   | 0.24232264  | 2854890 | 0.0888531   | experimental | ChemBridge | 5238755 |
| 1579 J13 | X | 992  | 1000 | 1.69342379  | 794  | 800  | 0.95640888  | 3102095   | 0.82878883  | 2744916 | -0.13952073 | experimental | ChemBridge | 5250822 |
| 1579 J14 | X | 473  | 480  | -0.19534003 | 394  | 400  | -0.5426881  | 2838400   | 0.27575092  | 3138250 | 0.67728317  | experimental | ChemBridge | 5240489 |
| 1579 J15 | X | 315  | 320  | -0.77033942 | 516  | 520  | -0.08546352 | 3162861   | 0.95623114  | 3375194 | 1.169325    | experimental | ChemBridge | 5253429 |
| 1579 J16 | X | 595  | 600  | 0.24864684  | 314  | 320  | -0.84250749 | 2760354   | 0.11206789  | 2905769 | 0.19450927  | experimental | ChemBridge | 5240668 |
| 1579 J17 | X | 354  | 360  | -0.62840919 | 515  | 520  | -0.08921126 | 3412926   | 1.48068335  | 3110771 | 0.62021982  | experimental | ChemBridge | 5256483 |
| 1579 J18 | X | 471  | 480  | -0.2026185  | 473  | 480  | -0.24661644 | 2689463   | -0.03660922 | 2774325 | -0.07844952 | experimental | ChemBridge | 5240815 |
| 1579 J19 | X | 594  | 600  | 0.2450076   | 353  | 360  | -0.69634554 | 3014388   | 0.64484413  | 3061254 | 0.517392    | experimental | ChemBridge | 5256200 |
| 1579 J20 | X | 800  | 810  | 0.9692157   | 574  | 600  | 0.20057677  | 1865142   | -1.7613032  | 2175961 | -1.4759826  | experimental | ChemBridge | 5272235 |
| 1579 J21 | X | 834  | 840  | 1.18705444  | 994  | 1000 | 0.70591877  | 2894253   | -0.39289344 | 2964604 | 0.31668701  | experimental | ChemBridge | 5231142 |
| 1579 J22 | X | 672  | 680  | 0.52886806  | 392  | 400  | -0.55018358 | 2732128   | 0.05287053  | 3128728 | 0.65750963  | experimental | ChemBridge | 5273636 |
| 1579 J23 | N | 433  | 440  | -0.3409095  | 554  | 560  | 0.05695069  | 2887582   | 0.37889854  | 2742331 | -0.1448879  | empty        |            |         |
| 1579 J24 | P | 596  | 600  | 0.25228608  | 475  | 480  | -0.23912096 | 2554870   | -0.31888621 | 2524248 | -0.59776356 | empty        |            |         |
| 1579 K01 | X | 473  | 480  | -0.19534003 | 354  | 360  | -0.6925978  | 1464685   | -2.60529145 | 1751768 | -2.20190833 | experimental | ChemBridge | 5269914 |
| 1579 K02 | X | 313  | 320  | -0.77761789 | 474  | 480  | -0.2428687  | 2559245   | -0.30971068 | 2980738 | 0.35019114  | experimental | ChemBridge | 5266651 |
| 1579 K03 | X | 991  | 1000 | 1.68978455  | 790  | 800  | 0.94141791  | 2814297   | 0.22520058  | 2804333 | -0.01613441 | experimental | ChemBridge | 5270556 |
| 1579 K04 | X | 1874 | 1900 | 3.20323081  | 1494 | 1880 | 1.90323081  | 2787909   | 0.1698805   | 2897580 | 0.1594535   | experimental | ChemBridge | 5146371 |
| 1579 K05 | X | 472  | 480  | -0.19897927 | 350  | 360  | -0.70758877 | 3230087   | 1.09722178  | 2812381 | 0.0005782   | experimental | ChemBridge | 5219711 |
| 1579 K06 | X | 234  | 240  | -1.06511759 | 633  | 640  | 0.35302235  | 3142469   | 0.91346374  | 3644886 | 1.72937188  | experimental | ChemBridge | 5149499 |
| 1579 K07 | X | 316  | 320  | -0.76670018 | 554  | 560  | 0.05695069  | 3325274   | 1.296854    | 3432556 | 1.28844388  | experimental | ChemBridge | 5219813 |
| 1579 K08 | X | 276  | 280  | -0.91226965 | 394  | 400  | -0.5426881  | 3805938   | 2.30493308  | 3539478 | 1.51047988  | experimental | ChemBridge | 5151048 |
| 1579 K09 | X | 356  | 360  | -0.62113072 | 434  | 440  | -0.3927784  | 2780444   | 0.15420192  | 3006755 | 0.40421847  | experimental | ChemBridge | 5220072 |
| 1579 K10 | X | 314  | 320  | -0.77397866 | 592  | 600  | 0.1936491   | 2724737   | 0.03736966  | 2901280 | 0.18518734  | experimental | ChemBridge | 5152010 |
| 1579 K11 | X | 840  | 850  | 0.9577677   | 594  | 600  | 0.20057677  | 2744923   | 0.07970502  | 3234822 | 1.03427626  | experimental | ChemBridge | 5220779 |
| 1579 K12 | X | 311  | 320  | -0.78489637 | 472  | 480  | -0.25036419 | 2789962   | 0.17416367  | 3479419 | 1.38576037  | experimental | ChemBridge | 5153845 |
| 1579 K13 | X | 1474 | 1480 | 3.44753585  | 1074 | 1080 | 2.00577677  | 3016816   | 0.64993629  | 3277473 | 0.96639596  | experimental | ChemBridge | 5223930 |
| 1579 K14 | X | 312  | 320  | -0.78125713 | 353  | 360  | -0.69634554 | 3327149   | 1.30078637  | 3616142 | 1.66968161  | experimental | ChemBridge | 5174592 |
| 1579 K15 | X | 276  | 280  | -0.91226965 | 355  | 360  | -0.68885005 | 3329073   | 1.30482151  | 3766740 | 1.98185523  | experimental | ChemBridge | 5263294 |
| 1579 K16 | X | 395  | 400  | -0.47920049 | 435  | 440  | -0.38903066 | 3369873   | 1.39038986  | 3047945 | 0.48975431  | experimental | ChemBridge | 5174705 |
| 1579 K17 | X | 555  | 560  | 0.10307737  | 554  | 560  | 0.05695069  | 3234751   | 1.10700342  | 3157886 | 0.71805961  | experimental | ChemBridge | 5264050 |
| 1579 K18 | X | 13   | 20   | 0.67807677  | 594  | 600  | 0.20057677  | 2260855   | -0.93551314 | 3079709 | -1.27793647 | experimental | ChemBridge | 5175195 |
| 1579 K19 | X | 594  | 600  | 0.2450076   | 395  | 400  | -0.53894036 | 0.1811404 | 0.9348177   | 3398844 | 0.21843699  | experimental | ChemBridge | 5264899 |
| 1579 K20 | X | 354  | 360  | -0.62840919 | 193  | 200  | -1.29598433 | 3113588   | 0.85289268  | 2614134 | -0.4111048  | experimental | ChemBridge | 5175989 |
| 1579 K21 | X | 354  | 360  | -0.62840919 | 314  | 320  | -0.84250749 | 3108622   | 0.84247767  | 3065495 | 0.52619893  | experimental | ChemBridge | 5265623 |
| 1579 K22 | X | 552  | 560  | 0.09215966  | 353  | 360  | -0.69634554 | 3107025   | 0.83912834  | 2935863 | 0.25700297  | experimental | ChemBridge | 5259647 |
| 1579 K23 | N | 714  | 720  | 0.681716    | 594  | 600  | 0.20686039  | 3046764   | 0.71274514  | 2820901 | 0.01827098  | empty        |            |         |
| 1579 K24 | P | 671  | 680  | 0.52522883  | 553  | 560  | 0.05320295  | 3309843   | 1.26449113  | 2925824 | 0.23615582  | empty        |            |         |
| 1579 L01 | X | 435  | 440  | -0.33363102 | 715  | 720  | 0.66033723  | 2314169   | -0.82369964 | 2667886 | -0.29948251 | experimental | ChemBridge | 5225809 |
| 1579 L02 | X | 475  | 480  | -0.18806156 | 673  | 680  | 0.50293205  | 2741073   | 0.07163055  | 2887680 | 0.1594535   | experimental | ChemBridge | 5233771 |
| 1579 L03 | X | 473  | 480  | -0.19534003 | 633  | 640  | 0.35302235  | 3179510   | 0.99114848  | 3426573 | 1.27601949  | experimental | ChemBridge | 5226730 |
| 1579 L04 | X | 352  | 360  | -0.63568766 | 390  | 400  | -0.55767907 | 2374105   | -0.69799805 | 2347481 | -0.96484084 | experimental | ChemBridge | 5234071 |
| 1579 L05 | X | 393  | 400  | -0.48647896 | 514  | 520  | -0.092959   | 3393702   | 1.44036555  | 3651579 | 1.74327068  | experimental | ChemBridge | 5227793 |
| 1579 L06 | X | 435  | 440  | -0.33363102 | 552  | 560  | 0.04945521  | 2826975   | 0.25178968  | 3351158 | 1.11941145  | experimental | ChemBridge | 5235017 |
| 1579 L07 | X | 235  | 240  | -1.06147835 | 354  | 360  | -0.6925978  | 3088639   | 0.80056805  | 3517154 | 1.46412149  | experimental | ChemBridge | 5228759 |
| 1579 L08 | X | 476  | 480  | -0.18442232 | 434  | 440  | -0.3927784  | 2892342   | 0.38888151  | 3161409 | 0.72537553  | experimental | ChemBridge | 5237681 |
| 1579 L09 | X | 395  | 400  | -0.47920049 | 435  | 440  | -0.38903066 | 3368993   | 2.01772333  | 3234822 | 0.87782618  | experimental | ChemBridge | 5220145 |
| 1579 L10 | X | 316  | 320  | -0.76670018 | 433  | 440  | -0.39652614 | 279520    | -0.89636772 | 2094607 | -1.48996318 | experimental | ChemBridge | 5238286 |
| 1579 L11 | X | 354  | 360  | -0.62840919 | 433  | 440  | -0.39652614 | 3685601   | 2.05255468  | 3325537 | 1.06620646  | experimental | ChemBridge | 5248791 |
| 1579 L12 | X | 436  | 440  | -0.32999179 | 434  | 440  | -0.3927784  | 2932861   | 0.47386053  | 3001397 | 0.39309196  | experimental | ChemBridge | 5240331 |
| 1579 L13 | X | 392  | 400  | -0.4901182  | 593  | 600  | 0.20311265  | 3024309   | 0.66565109  | 3293957 | 1.0006269   | experimental | ChemBridge | 5251174 |
| 1579 L14 | X | 396  | 400  | -0.47556125 | 434  | 440  | -0.3927784  | 2800067   | 0.19535652  | 2729474 | -0.17158785 | experimental | ChemBridge | 5240494 |
| 1579 L15 | X | 316  | 320  | -0.76670018 | 355  | 360  | -0.68885005 | 3546147   | 1.76008289  | 3180822 | 0.72415656  | experimental | ChemBridge | 5235382 |
| 1579 L16 | X | 436  | 440  | -0.32999179 | 435  | 440  | -0.08921126 | 2981388   | 0.57563444  | 3187216 | 0.01269526  | experimental | ChemBridge | 5232766 |
| 1579 L17 | X | 234  | 240  | -1.06511759 | 354  | 360  | -0.6925978  | 3298365   | 1.24041874  | 3029497 | 0.45144489  | experimental | ChemBridge | 5255697 |
| 1579 L18 | X | 795  | 800  | 0.97649417  | 595  | 600  | 0.21060813  | 1784130   | -1.93533121 | 2042222 | -1.59874674 | experimental | ChemBridge | 5240819 |
| 1579 L19 | X | 314  | 320  | -0.77397866 | 394  | 400  | -0.5426881  | 2431761   | -0.57707822 | 3226863 | 0.8609246   | experimental | ChemBridge | 5256221 |
| 1579 L20 | X | 356  | 360  | -0.62113072 | 555  | 560  | 0.06069844  | 2996925   | 0.60821962  | 3101239 | 0.60042551  | experimental | ChemBridge | 5272272 |
| 1579 L21 | X | 353  | 360  | -0.63204843 | 472  | 480  | -0.25036419 | 2588746   | -0.24783931 | 2868593 | 0.11730897  | experimental | ChemBridge | 5232123 |
| 1579 L22 | X | 995  | 1000 | 1.7043415   | 954  | 960  | 1.55604768  | 2650440   | -0.11845073 | 2839735 | 0.05738197  | experimental | ChemBridge | 5273734 |
| 1579 L23 | N | 426  | 440  | -0.36638415 | 587  |      |             |           |             |         |             |              |            |         |

|          |   |        |        |             |        |        |             |         |              |          |             |              |            |         |
|----------|---|--------|--------|-------------|--------|--------|-------------|---------|--------------|----------|-------------|--------------|------------|---------|
| 1579 M13 | X | 395    | 400    | -0.47920049 | 473    | 480    | -0.24661644 | 2750269 | 0.09091699   | 2629156  | -0.37990987 | experimental | ChemBridge | 5224020 |
| 1579 M14 | X | 275    | 280    | -0.91590889 | 714    | 720    | 0.65658949  | 2256463 | -0.94472433  | 3073984  | 0.54382733  | experimental | ChemBridge | 5174602 |
| 1579 M15 | X | 395    | 400    | -0.47920049 | 594    | 560    | 0.05695069  | 2713740 | 0.01430605   | 2787541  | -0.05100495 | experimental | ChemBridge | 5263301 |
| 1579 M16 | X | 555    | 560    | 0.10307737  | 554    | 560    | 0.05695069  | 2430744 | -0.57921114  | 2867000  | -0.91887005 | experimental | ChemBridge | 5175081 |
| 1579 M17 | X | 315    | 320    | -0.77033942 | 594    | 400    | -0.54268881 | 2639071 | -0.14292452  | 3154521  | 0.71107118  | experimental | ChemBridge | 5264057 |
| 1579 M18 | X | 515    | 520    | -0.04249209 | 514    | 520    | -0.092959   | 2930015 | 0.46789172   | 2919769  | 0.2235819   | experimental | ChemBridge | 5175211 |
| 1579 M19 | X | 435    | 440    | -0.33363102 | 594    | 600    | 0.20686039  | 2272433 | -0.91123103  | 2000637  | -1.68510284 | experimental | ChemBridge | 5265200 |
| 1579 M20 | X | 474    | 480    | -0.19170079 | 473    | 480    | -0.24661644 | 2779459 | 0.15213611   | 2724524  | -0.1818671  | experimental | ChemBridge | 5176442 |
| 1579 M21 | X | 715    | 720    | 0.68535524  | 834    | 840    | 1.10631858  | 2592042 | -0.24092673  | 2873454  | 0.12740341  | experimental | ChemBridge | 5265679 |
| 1579 M22 | X | 430    | 440    | -0.35182721 | 629    | 640    | 0.33803138  | 2641287 | -0.13764699  | 2677888  | -0.27871219 | experimental | ChemBridge | 5259946 |
| 1579 M23 | N | 713    | 1320   | 0.67807677  | 819    | 1360   | 1.0463547   | 2499390 | -0.43524239  | 2646685  | -0.34350886 | empty        |            |         |
| 1579 M24 | P | 208265 | 208280 | 756.008922  | 185267 | 185280 | 692.313703  | 2285561 | -0.88160089  | 2549451  | -0.54436336 | empty        |            |         |
| 1579 N01 | X | 355    | 360    | -0.62476995 | 515    | 520    | -0.08921126 | 1949966 | -1.5875293   | 2260462  | -1.14554594 | experimental | ChemBridge | 5226161 |
| 1579 N02 | X | 436    | 440    | -0.32999179 | 234    | 240    | -1.14232689 | 1226819 | -0.10415913  | 1307633  | -3.12420643 | experimental | ChemBridge | 5233894 |
| 1579 N03 | X | 435    | 440    | -0.33363102 | 314    | 320    | -0.84250749 | 2408470 | -0.62592559  | 2511845  | -0.62351984 | experimental | ChemBridge | 5226757 |
| 1579 N04 | X | 436    | 440    | -0.32999179 | 356    | 360    | -0.68510231 | 2666203 | -0.08539157  | 2572057  | -0.4984826  | experimental | ChemBridge | 5234076 |
| 1579 N05 | X | 272    | 280    | -0.9268266  | 435    | 440    | -0.38903066 | 2316763 | -0.81625933  | 2416688  | -0.82112444 | experimental | ChemBridge | 5227857 |
| 1579 N06 | X | 594    | 600    | 0.2450076   | 313    | 320    | -0.84625524 | 2737661 | 0.06447469   | 2854250  | 0.08752406  | experimental | ChemBridge | 5235222 |
| 1579 N07 | X | 394    | 400    | -0.48283973 | 514    | 520    | -0.092959   | 2462478 | -0.51265658  | 2614425  | -0.41050051 | experimental | ChemBridge | 5228446 |
| 1579 N08 | X | 634    | 640    | 0.39057707  | 914    | 920    | 1.40613798  | 2815734 | 0.22821435   | 3016986  | 0.42546434  | experimental | ChemBridge | 5237740 |
| 1579 N09 | X | 355    | 360    | -0.62476995 | 313    | 320    | -0.84625524 | 2580810 | -0.26448319  | 2465174  | -0.72043761 | experimental | ChemBridge | 5230305 |
| 1579 N10 | X | 356    | 360    | -0.62113072 | 676    | 680    | 0.51417527  | 2443166 | -0.55315893  | 2540535  | -0.56394171 | experimental | ChemBridge | 5238311 |
| 1579 N11 | X | 394    | 400    | -0.48283973 | 273    | 280    | -0.99616494 | 2576542 | -0.27343431  | 2458929  | -0.73340608 | experimental | ChemBridge | 5248817 |
| 1579 N12 | X | 635    | 640    | 0.39421631  | 915    | 920    | 1.40988572  | 2723779 | 0.03536048   | 2926745  | 0.23806838  | experimental | ChemBridge | 5240447 |
| 1579 N13 | X | 755    | 760    | 0.8309247   | 553    | 560    | 0.05320295  | 2245417 | -0.9678907   | 2578834  | -0.48440937 | experimental | ChemBridge | 5251234 |
| 1579 N14 | X | 355    | 440    | -0.62476995 | 594    | 594    | 0.20686039  | 3020516 | 0.65769617   | 2838325  | 0.54247034  | experimental | ChemBridge | 5254263 |
| 1579 N15 | X | 355    | 440    | -0.62476995 | 394    | 400    | -0.54268881 | 2481014 | 0.47377817   | 2828488  | -0.58893794 | experimental | ChemBridge | 5235980 |
| 1579 N16 | X | 474    | 480    | -0.19170079 | 594    | 600    | 0.20686039  | 2533012 | -0.336472819 | 2616375  | -0.4064511  | experimental | ChemBridge | 5240765 |
| 1579 N17 | X | 476    | 480    | -0.18442232 | 514    | 520    | -0.092959   | 2417579 | -0.60682161  | 2508515  | -0.63043497 | experimental | ChemBridge | 5255887 |
| 1579 N18 | X | 474    | 480    | -0.19170079 | 434    | 440    | -0.3927784  | 2734722 | 0.05831083   | 2702085  | -0.2284643  | experimental | ChemBridge | 5240849 |
| 1579 N19 | X | 395    | 400    | -0.47920049 | 555    | 560    | 0.06069844  | 2574934 | -0.27680671  | 2676229  | -0.28132665 | experimental | ChemBridge | 5256271 |
| 1579 N20 | X | 475    | 480    | -0.18806156 | 354    | 360    | -0.6925978  | 2549980 | -0.32914183  | 2427336  | -0.79901262 | experimental | ChemBridge | 5272415 |
| 1579 N21 | X | 393    | 400    | -0.48647896 | 512    | 520    | -0.10045449 | 2426069 | -0.58901585  | 2553940  | -0.53610466 | experimental | ChemBridge | 5231235 |
| 1579 N22 | X | 440    | 440    | -0.33363102 | 511    | 520    | -0.33363102 | 2114958 | 0.1991513    | 22045936 | 0.70459316  | experimental | ChemBridge | 5273969 |
| 1579 N23 | N | 508    | 520    | -0.06796675 | 629    | 640    | 0.33803138  | 2387832 | -0.66920891  | 2196986  | -1.27736125 | empty        |            |         |
| 1579 N24 | P | 1314   | 1920   | 2.86525799  | 1180   | 1720   | 2.40330747  | 2632392 | -0.15630214  | 2421275  | -0.811599   | empty        |            |         |
| 1579 O01 | X | 596    | 600    | 0.25228608  | 955    | 960    | 1.55979542  | 2066812 | -1.34247245  | 2196279  | -1.27882942 | experimental | ChemBridge | 5270187 |
| 1579 O02 | X | 274    | 280    | -0.91954812 | 512    | 520    | -0.10045449 | 2131415 | -1.20698293  | 2412986  | -0.82881207 | experimental | ChemBridge | 5266833 |
| 1579 O03 | X | 435    | 440    | -0.33363102 | 914    | 920    | 1.40613798  | 2310522 | -0.83134836  | 2944696  | 0.27534572  | experimental | ChemBridge | 5271005 |
| 1579 O04 | X | 635    | 640    | 0.39421631  | 434    | 440    | -0.3927784  | 2613604 | -0.19570553  | 2994114  | 0.37796796  | experimental | ChemBridge | 5147629 |
| 1579 O05 | X | 440    | 440    | -0.33363102 | 313    | 320    | -0.84625524 | 2664189 | -0.08961546  | 2613292  | -0.213292   | experimental | ChemBridge | 5219753 |
| 1579 O06 | X | 434    | 440    | -0.33727026 | 395    | 400    | -0.53894036 | 2760597 | 0.11257753   | 2847729  | 0.07398245  | experimental | ChemBridge | 5150050 |
| 1579 O07 | X | 394    | 400    | -0.48283973 | 274    | 280    | -0.99241719 | 2320676 | -0.81005274  | 2392702  | -0.87093416 | experimental | ChemBridge | 5219826 |
| 1579 O08 | X | 875    | 880    | 1.2676331   | 794    | 800    | 0.95640888  | 2840170 | 0.27946308   | 2977946  | 0.34439323  | experimental | ChemBridge | 5151120 |
| 1579 O09 | X | 314    | 320    | -0.77397866 | 394    | 400    | -0.54268881 | 2418553 | -0.60477888  | 2737503  | -0.15491469 | experimental | ChemBridge | 5220184 |
| 1579 O10 | X | 315    | 320    | -0.77033942 | 474    | 480    | -0.2428687  | 2389842 | -0.66499341  | 2768286  | -0.09099002 | experimental | ChemBridge | 5152412 |
| 1579 O11 | X | 595    | 600    | 0.24864684  | 474    | 480    | -0.2428687  | 2007550 | -1.46676048  | 2396897  | -0.86222276 | experimental | ChemBridge | 5220849 |
| 1579 O12 | X | 394    | 440    | -0.33727026 | 354    | 360    | -0.6925978  | 2411359 | -0.6196659   | 2565428  | -0.57247037 | experimental | ChemBridge | 5154263 |
| 1579 O13 | X | 313    | 320    | -0.77033942 | 432    | 440    | -0.372604   | 2326004 | -0.7014660   | 2825571  | -0.40965304 | experimental | ChemBridge | 5242228 |
| 1579 O14 | X | 316    | 320    | -0.76670018 | 435    | 440    | -0.38903066 | 2764613 | 0.12100014   | 2714789  | -0.20208296 | experimental | ChemBridge | 5174617 |
| 1579 O15 | X | 355    | 360    | -0.62476995 | 394    | 400    | -0.54268881 | 2455312 | -0.52768557  | 2748347  | -0.13239586 | experimental | ChemBridge | 5263722 |
| 1579 O16 | X | 674    | 680    | 0.53614654  | 753    | 760    | 0.80275144  | 2864727 | 0.33096558   | 2654626  | -0.32701844 | experimental | ChemBridge | 5175082 |
| 1579 O17 | X | 393    | 400    | -0.48647896 | 472    | 480    | -0.25036419 | 2658622 | -0.10129092  | 2506102  | -0.63544584 | experimental | ChemBridge | 5264100 |
| 1579 O18 | X | 475    | 480    | -0.18806156 | 474    | 480    | -0.2428687  | 2797274 | 0.18949886   | 2673972  | -0.28684422 | experimental | ChemBridge | 5175471 |
| 1579 O19 | X | 394    | 400    | -0.48283973 | 474    | 480    | -0.2428687  | 2637272 | -0.1460675   | 2564315  | -0.51455976 | experimental | ChemBridge | 5265231 |
| 1579 O20 | X | 512    | 520    | -0.0534098  | 513    | 520    | -0.09570675 | 2744611 | 0.07905067   | 3631757  | 1.70210798  | experimental | ChemBridge | 5176475 |
| 1579 O21 | X | 875    | 880    | 1.2676331   | 952    | 960    | 1.54855219  | 2330040 | -0.79041397  | 2404719  | -0.84597946 | experimental | ChemBridge | 5265688 |
| 1579 O22 | X | 474    | 480    | -0.19170079 | 1154   | 1160   | 2.30559617  | 2152876 | -1.16197356  | 2479403  | -0.69088943 | experimental | ChemBridge | 5259966 |
| 1579 O23 | N | 393    | 400    | -0.48647896 | 352    | 360    | -0.70009328 | 2180028 | -1.10502866  | 2255007  | -1.15687388 | empty        |            |         |
| 1579 O24 | P | 632    | 640    | 0.3832986   | 552    | 560    | 0.04945521  | 2280202 | -0.89493739  | 2364272  | -0.92997237 | empty        |            |         |
| 1579 P01 | X | 677    | 680    | 0.54706425  | 796    | 800    | 0.96390437  | 1746000 | -2.01529976  | 1814689  | -2.07124554 | experimental | ChemBridge | 5226197 |
| 1579 P02 | X | 556    | 560    | 0.10671661  | 474    | 480    | -0.2428687  | 1962966 | -1.56026488  | 2272251  | -1.12106471 | experimental | ChemBridge | 5233908 |
| 1579 P03 | X | 435    | 440    | -0.33363102 | 795    | 800    | 0.96015663  | 2186115 | -1.09226262  | 2508619  | -0.4630219  | experimental | ChemBridge | 5226758 |
| 1579 P04 | X | 554    | 560    | 0.09943814  | 353    | 360    | -0.69634554 | 2186189 | -1.09210742  | 2441084  | -0.7704633  | experimental | ChemBridge | 5234077 |
| 1579 P05 | X | 996    | 1000   | 1.70798074  | 1236   | 1240   | 2.61291105  | 1976071 | -1.53278024  | 2131748  | -1.41283556 | experimental | ChemBridge | 5227932 |
| 1579 P06 | X | 474    | 480    | -0.19170079 | 674    | 680    | 0.50667979  | 2146675 | -1.17497869  | 2567798  | -0.50732691 | experimental | ChemBridge | 5235788 |
| 1579 P07 | X | 516    | 520    | -0.03885285 | 356    | 360    | -0.68510231 | 2514464 | -0.40362824  | 2567792  | -0.50733937 | experimental | ChemBridge | 5229212 |
| 1579 P08 | X | 474    | 480    | -0.19170079 | 475    | 520    | -0.08921126 | 2265780 | -0.92518412  | 2717790  | -0.19585104 | experimental | ChemBridge | 5237886 |
| 1579 P09 | X | 676    | 680    | 0.54342501  | 516    | 480    | -0.23537322 | 2382980 | -0.67938484  | 2745631  | -0.13803595 | experimental | ChemBridge | 5230789 |
| 1579 P10 | X | 435    | 440    | -0.33363102 | 395    | 400    | -0.53894036 | 2322652 | -0.80059055  | 25651506 | -1.01787098 | experimental | ChemBridge | 5238318 |
| 1579 P11 | X | 715    | 720    | 0.68535524  | 916    | 920    | 1.41363346  | 2175366 | -1.13480612  | 2482713  | -0.68801383 | experimental | ChemBridge | 5248991 |
| 1579 P12 | X | 434    | 440    | -0.33727026 | 353    | 360    | -0.69634554 | 1986265 | -1.51140074  | 2022918  | -1.63883375 | experimental | ChemBridge | 5240449 |
| 1579 P13 | X | 756    | 760    | 0.83456394  | 1276   | 1280   | 2.76282075  | 2369551 | -0.70754899  | 2310340  | -1.04196846 | experimental | ChemBridge | 5251243 |
| 1579 P14 | X | 476    | 480    | -0.18442232 | 434    | 440    | -0.3927784  | 2344898 | -0.75925283  | 2396532  | -0.86298072 | experimental | ChemBridge | 5240576 |
| 1579 P15 | X | 395    | 400    | -0.47920049 | 395    | 400    | -0.53894036 | 2471616 | -0.49349179  | 2137007  | -1.40191464 | experimental | ChemBridge | 5254323 |
| 1579 P16 | X | 835    | 840    | 1.12206364  | 914    | 920    | 1.40613798  | 2377685 | -0.69048985  | 2462051  | -0.72692288 | experimental | ChemBridge | 5240774 |
| 1579 P17 | X | 755    | 760    | 0           |        |        |             |         |              |          |             |              |            |         |

|          |   |  |      |      |             |      |      |             |         |             |         |             |              |            |         |
|----------|---|--|------|------|-------------|------|------|-------------|---------|-------------|---------|-------------|--------------|------------|---------|
| 1580 A07 | X |  | 434  | 440  | -0.54907612 | 354  | 360  | -0.92575781 | 2053931 | -1.76352072 | 1666749 | -2.24043595 | experimental | ChemBridge | 5242396 |
| 1580 A08 | X |  | 676  | 680  | 0.32645295  | 716  | 720  | 0.42141393  | 2552564 | -0.85585291 | 2575687 | -0.46942019 | experimental | ChemBridge | 5313216 |
| 1580 A09 | X |  | 555  | 560  | -0.11131158 | 595  | 600  | -0.02888381 | 2570714 | -0.82281424 | 2845409 | 0.05611831  | experimental | ChemBridge | 5243212 |
| 1580 A10 | X |  | 516  | 520  | -0.25240924 | 516  | 520  | -0.32287985 | 2065001 | -1.74154095 | 282353  | -1.54721037 | experimental | ChemBridge | 5314659 |
| 1580 A11 | X |  | 355  | 360  | -0.83488933 | 395  | 400  | -0.77317759 | 2979310 | -0.07904110 | 2253589 | -0.01909019 | experimental | ChemBridge | 5244547 |
| 1580 A12 | X |  | 517  | 520  | -0.24879135 | 476  | 480  | -0.47173861 | 3372586 | 0.63684326  | 3327312 | 0.99507983  | experimental | ChemBridge | 5316327 |
| 1580 A13 | X |  | 356  | 360  | -0.83127144 | 397  | 400  | -0.76573465 | 2704794 | -0.57874676 | 2457267 | -0.70015506 | experimental | ChemBridge | 5244803 |
| 1580 A14 | X |  | 592  | 600  | 0.02255503  | 394  | 400  | -0.77689606 | 2661322 | -0.65787938 | 2762895 | -0.10465569 | experimental | ChemBridge | 5258524 |
| 1580 A15 | X |  | 1750 | 1760 | 4.21206544  | 1194 | 1200 | 2.20027606  | 2067858 | -1.73816923 | 1920493 | -1.74602971 | experimental | ChemBridge | 5245939 |
| 1580 A16 | X |  | 1713 | 1720 | 4.07820356  | 674  | 680  | 0.26511223  | 3018138 | -0.00836281 | 2937826 | 0.23618775  | experimental | ChemBridge | 5257462 |
| 1580 A17 | X |  | 351  | 360  | -0.84936088 | 515  | 520  | -0.32660132 | 2885197 | -0.25035695 | 2586152 | -0.44902972 | experimental | ChemBridge | 5301378 |
| 1580 A18 | X |  | 717  | 720  | 0.47478639  | 796  | 800  | 0.71913144  | 2823080 | -0.35250742 | 2873553 | 0.10591082  | experimental | ChemBridge | 5256929 |
| 1580 A19 | X |  | 274  | 280  | -1.12793831 | 395  | 400  | -0.77317759 | 2892630 | -0.23682657 | 2671279 | -0.28228763 | experimental | ChemBridge | 5302168 |
| 1580 A20 | X |  | 516  | 520  | -0.25240924 | 435  | 440  | -0.62431883 | 3111887 | 0.16228965  | 2858205 | 0.08105061  | experimental | ChemBridge | 5256297 |
| 1580 A21 | X |  | 596  | 600  | 0.03702186  | 517  | 520  | -0.31915838 | 2506883 | -0.9390066  | 2496811 | -0.62310575 | experimental | ChemBridge | 5302789 |
| 1580 A22 | X |  | 513  | 520  | -0.26326291 | 395  | 400  | -0.77317759 | 2207437 | -1.48409185 | 2270152 | -1.06473836 | experimental | ChemBridge | 5308761 |
| 1580 A23 | N |  | 1035 | 1040 | 1.625275    | 595  | 600  | -0.02888381 | 2247563 | -1.41105    | 2216219 | -1.16982384 | empty        |            |         |
| 1580 A24 | P |  | 794  | 800  | 0.75336382  | 956  | 960  | 1.31456646  | 2105948 | -1.66883354 | 1974419 | -1.64095786 | experimental | ChemBridge | 5307887 |
| 1580 B01 | X |  | 595  | 600  | 0.03340397  | 472  | 480  | -0.48662448 | 2145089 | -1.59758469 | 2153707 | -1.29162504 | experimental | ChemBridge | 5339928 |
| 1580 B02 | X |  | 634  | 640  | 0.17450163  | 1195 | 1200 | 2.20399753  | 2238094 | -1.42828654 | 2194542 | -1.21206029 | experimental | ChemBridge | 5306695 |
| 1580 B03 | X |  | 554  | 560  | -0.11492947 | 352  | 360  | -0.93320075 | 2940317 | -0.15002134 | 2598141 | -0.42566981 | experimental | ChemBridge | 5309581 |
| 1580 B04 | X |  | 515  | 520  | -0.25602713 | 476  | 480  | -0.47173861 | 2641877 | -0.69327536 | 2870061 | 0.10415137  | experimental | ChemBridge | 5309581 |
| 1580 B05 | X |  | 275  | 280  | -1.12432042 | 275  | 280  | -1.21975385 | 3176061 | 0.27910638  | 2524991 | -0.56819856 | experimental | ChemBridge | 5284096 |
| 1580 B06 | X |  | 472  | 480  | -0.41159635 | 353  | 360  | -0.92947928 | 2973723 | -0.08921198 | 2716994 | -0.19409127 | experimental | ChemBridge | 5310520 |
| 1580 B07 | X |  | 875  | 880  | 1.04641281  | 956  | 960  | 1.31456646  | 2553477 | -0.85419097 | 2177447 | -1.24536896 | experimental | ChemBridge | 5282818 |
| 1580 B08 | X |  | 280  | 280  | 1.13155623  | 313  | 320  | -0.78338041 | 2666736 | 0.64802427  | 2173953 | -1.05723232 | experimental | ChemBridge | 5281197 |
| 1580 B09 | X |  | 475  | 480  | -0.40078608 | 354  | 360  | -0.92575781 | 2840218 | -0.33223278 | 2697058 | -0.23294232 | experimental | ChemBridge | 5281197 |
| 1580 B10 | X |  | 314  | 320  | -0.98322276 | 474  | 480  | -0.47918154 | 3198672 | 0.32026546  | 2979970 | 0.31830302  | experimental | ChemBridge | 5286205 |
| 1580 B11 | X |  | 676  | 680  | 0.32645295  | 633  | 640  | 0.11253201  | 3188900 | 0.30247737  | 3006209 | 0.36942827  | experimental | ChemBridge | 5279533 |
| 1580 B12 | X |  | 314  | 320  | -0.98322276 | 714  | 720  | 0.41397099  | 3272871 | 0.45533082  | 1875398 | -1.83389484 | experimental | ChemBridge | 5259044 |
| 1580 B13 | X |  | 395  | 400  | -0.69017378 | 234  | 240  | -1.37233408 | 3876020 | 1.55235039  | 2680139 | -0.26590121 | experimental | ChemBridge | 5326103 |
| 1580 B14 | X |  | 512  | 520  | -0.26688008 | 314  | 320  | -1.07461657 | 3246258 | 0.40688684  | 2645749 | -0.33290824 | experimental | ChemBridge | 5340250 |
| 1580 B15 | X |  | 1272 | 1280 | 2.48271463  | 1153 | 1160 | 2.04769583  | 3969912 | -1.72416316 | 2882419 | 0.12823026  | experimental | ChemBridge | 5325634 |
| 1580 B16 | X |  | 393  | 400  | -0.7540997  | 484  | 480  | -0.78062053 | 3132729 | 0.2002286   | 3093838 | 0.54016857  | experimental | ChemBridge | 5258615 |
| 1580 B17 | X |  | 516  | 520  | -0.25240924 | 394  | 400  | -0.77689606 | 3345637 | 0.58778767  | 2997855 | 0.35315096  | experimental | ChemBridge | 5320771 |
| 1580 B18 | X |  | 392  | 400  | -0.70102744 | 434  | 440  | -0.6280403  | 2976490 | -0.08417518 | 2740990 | -0.14733638 | experimental | ChemBridge | 5343522 |
| 1580 B19 | X |  | 835  | 840  | 0.90169726  | 474  | 480  | -0.47918154 | 3429147 | 0.73980195  | 3275289 | 0.89371587  | experimental | ChemBridge | 5319676 |
| 1580 B20 | X |  | 594  | 600  | 0.02978608  | 835  | 840  | 0.86426873  | 2902308 | -0.21920959 | 2756979 | -0.11618269 | experimental | ChemBridge | 5331294 |
| 1580 B21 | X |  | 393  | 400  | -0.69740956 | 312  | 320  | -1.08205951 | 2914768 | -0.1965285  | 2721878 | -0.18457506 | experimental | ChemBridge | 5340205 |
| 1580 B22 | X |  | 795  | 800  | 0.75698171  | 756  | 760  | 0.57027268  | 2890152 | -0.24133731 | 2613044 | -0.39663213 | experimental | ChemBridge | 5335157 |
| 1580 B23 | N |  | 360  | 360  | -0.85297877 | 433  | 433  | 0.71540997  | 2820441 | -0.36823317 | 3572553 | -0.82585899 | empty        |            |         |
| 1580 B24 | P |  | 1035 | 1040 | 1.625275    | 635  | 640  | 0.11997495  | 2373018 | -1.18268272 | 2295075 | -1.01617726 | empty        |            |         |
| 1580 C01 | X |  | 235  | 240  | -1.26903597 | 316  | 320  | -1.06717363 | 1436291 | -2.88781844 | 1467102 | -2.62943717 | experimental | ChemBridge | 5274216 |
| 1580 C02 | X |  | 435  | 440  | -0.54545823 | 392  | 400  | -0.78434199 | 2224783 | -1.45251672 | 1898584 | -1.78871819 | experimental | ChemBridge | 5303988 |
| 1580 C03 | X |  | 435  | 440  | -0.54545823 | 515  | 520  | -0.32660132 | 3141637 | 0.21644395  | 3460384 | 1.25436331  | experimental | ChemBridge | 5275858 |
| 1580 C04 | X |  | 315  | 320  | -0.97960488 | 475  | 480  | -0.47546008 | 2799748 | -0.40590082 | 2551109 | -0.51730908 | experimental | ChemBridge | 5305384 |
| 1580 C05 | X |  | 274  | 280  | -1.12793831 | 394  | 400  | -0.77689606 | 2885081 | -0.25056811 | 2982823 | 0.32386194  | experimental | ChemBridge | 5277208 |
| 1580 C06 | X |  | 1115 | 1120 | 1.9047061   | 795  | 800  | 0.7540997   | 2636259 | -0.70350187 | 2511141 | -1.19140872 | experimental | ChemBridge | 5316333 |
| 1580 C07 | X |  | 473  | 480  | -0.26688008 | 473  | 480  | -0.48290301 | 2936333 | -0.19369791 | 2958888 | 0.27722559  | experimental | ChemBridge | 5242388 |
| 1580 C08 | X |  | 395  | 400  | -0.69017378 | 475  | 480  | -0.47546008 | 2906324 | -0.21189922 | 2786234 | -0.05918093 | experimental | ChemBridge | 5313263 |
| 1580 C09 | X |  | 435  | 440  | -0.54545823 | 555  | 560  | -0.17774256 | 3383600 | 0.65689218  | 3253578 | 0.81959148  | experimental | ChemBridge | 5243223 |
| 1580 C10 | X |  | 435  | 440  | -0.54545823 | 554  | 560  | -0.18146403 | 3099345 | 0.1394593   | 2948410 | 0.25688101  | experimental | ChemBridge | 5314983 |
| 1580 C11 | X |  | 433  | 440  | -0.55269401 | 712  | 720  | 0.40652805  | 3281246 | 0.47057593  | 3334493 | 1.00907161  | experimental | ChemBridge | 5244584 |
| 1580 C12 | X |  | 355  | 360  | -0.83488933 | 594  | 600  | -0.03260528 | 3244706 | 0.40406172  | 2846494 | 0.05910917  | experimental | ChemBridge | 5316383 |
| 1580 C13 | X |  | 474  | 480  | -0.40436057 | 472  | 480  | -0.48662448 | 2730504 | -0.53194653 | 2778396 | -0.07445284 | experimental | ChemBridge | 5244983 |
| 1580 C14 | X |  | 473  | 480  | -0.40797846 | 393  | 400  | -0.78062053 | 3132729 | 0.2002286   | 3093838 | 0.54016857  | experimental | ChemBridge | 5258615 |
| 1580 C15 | X |  | 272  | 280  | -1.13517409 | 433  | 440  | -0.63176177 | 3390521 | 0.66949057  | 3170429 | 0.68940192  | experimental | ChemBridge | 5246062 |
| 1580 C16 | X |  | 436  | 440  | -0.54184034 | 475  | 480  | -0.47546008 | 3018034 | -0.00855212 | 2991216 | 0.34021524  | experimental | ChemBridge | 5257527 |
| 1580 C17 | X |  | 434  | 440  | -0.54907612 | 515  | 520  | -0.32660132 | 3088559 | 0.11982541  | 2968719 | 0.29638107  | experimental | ChemBridge | 5301508 |
| 1580 C18 | X |  | 515  | 520  | -0.25602713 | 353  | 360  | -0.92947928 | 2982449 | -0.07332794 | 2847174 | 0.05955731  | experimental | ChemBridge | 5256974 |
| 1580 C19 | X |  | 474  | 480  | -0.40436057 | 435  | 440  | -0.62431883 | 3044900 | 0.04035239  | 2898057 | 0.15870004  | experimental | ChemBridge | 5302173 |
| 1580 C20 | X |  | 474  | 480  | -0.40436057 | 473  | 480  | -0.48290301 | 3051857 | 0.0530163   | 2531510 | -0.55549665 | experimental | ChemBridge | 5256304 |
| 1580 C21 | X |  | 435  | 440  | -0.54545823 | 515  | 520  | -0.32660132 | 3286622 | 0.48036193  | 2975668 | 0.30992081  | experimental | ChemBridge | 5302841 |
| 1580 C22 | X |  | 474  | 480  | -0.40436057 | 354  | 360  | -0.92575781 | 2763692 | -0.47153401 | 2830629 | 0.02732029  | experimental | ChemBridge | 5308775 |
| 1580 C23 | N |  | 515  | 520  | -0.25602713 | 395  | 400  | -0.77317759 | 2892072 | -0.23784231 | 2822071 | 0.0106455   | empty        |            |         |
| 1580 C24 | P |  | 434  | 440  | -0.54907612 | 276  | 280  | -1.21603239 | 2523917 | -0.9079994  | 2577485 | -0.46591689 | empty        |            |         |
| 1580 D01 | X |  | 636  | 640  | 0.1817374   | 636  | 640  | 0.12369642  | 2302731 | -1.31062701 | 2191575 | -1.21784132 | experimental | ChemBridge | 5349825 |
| 1580 D02 | X |  | 355  | 360  | -0.83488933 | 635  | 640  | 0.11997495  | 3071468 | 0.08871445  | 3060534 | 0.47527755  | experimental | ChemBridge | 5339932 |
| 1580 D03 | X |  | 355  | 360  | -0.83488933 | 435  | 440  | -0.62431883 | 2873368 | -0.27188943 | 2626245 | -0.37091071 | experimental | ChemBridge | 5306915 |
| 1580 D04 | X |  | 316  | 320  | -0.54184034 | 354  | 360  | -0.92203631 | 3466487 | -0.80777247 | 3197526 | -1.16651331 | experimental | ChemBridge | 5309694 |
| 1580 D05 | X |  | 316  | 320  | -0.97588699 | 554  | 560  | -0.18146403 | 3137358 | 0.20845483  | 2709024 | -0.20862037 | experimental | ChemBridge | 5284384 |
| 1580 D06 | X |  | 353  | 360  | -0.8421251  | 633  | 640  | 0.11253201  | 3341050 | 0.57943789  | 3320150 | 0.98112506  | experimental | ChemBridge | 5310891 |
| 1580 D07 | X |  | 476  | 480  | -0.39712479 | 275  | 280  | -1.21975385 | 3220161 | 0.35938215  | 2859668 | 0.07669194  | experimental | ChemBridge | 5283495 |
| 1580 D08 | X |  | 313  | 320  | -0.98684065 | 393  | 400  | -0.78062053 | 3464408 | 0.80398798  | 3453229 | 1.24042219  | experimental | ChemBridge | 5317886 |
| 1580 D09 | X |  | 355  | 360  | -0.834      |      |      |             |         |             |         |             |              |            |         |



|          |   |  |      |      |             |      |      |             |          |             |          |             |              |            |         |
|----------|---|--|------|------|-------------|------|------|-------------|----------|-------------|----------|-------------|--------------|------------|---------|
| 1580 H19 | X |  | 633  | 640  | 0.17088374  | 952  | 960  | 1.29968059  | 2471849  | -1.00277942 | 2562770  | -0.49458826 | experimental | ChemBridge | 5320091 |
| 1580 H20 | X |  | 874  | 880  | 1.04279492  | 1193 | 1200 | 2.19655459  | 2946630  | -0.13852971 | 2976154  | 0.31086776  | experimental | ChemBridge | 5332338 |
| 1580 H21 | X |  | 391  | 400  | -0.70464533 | 430  | 440  | -0.64292618 | 3184209  | 0.29393828  | 3411208  | 1.15854658  | experimental | ChemBridge | 5340218 |
| 1580 H22 | X |  | 994  | 1000 | 1.47694157  | 894  | 1000 | 1.45598228  | 31011730 | 0.14380074  | 2745932  | -0.13770716 | experimental | ChemBridge | 5336225 |
| 1580 H23 | N |  | 513  | 520  | -0.26326291 | 393  | 400  | -0.78062053 | 3037649  | 0.02271533  | 2814434  | -0.00441404 | empty        |            |         |
| 1580 H24 | P |  | 396  | 400  | -0.68655589 | 436  | 440  | -0.62059736 | 2460049  | -1.02425911 | 2466106  | -0.68293275 | empty        |            |         |
| 1580 I01 | X |  | 356  | 360  | -0.83127144 | 677  | 680  | 0.27627664  | 2711362  | -0.56679095 | 2528721  | -0.56093086 | experimental | ChemBridge | 5274942 |
| 1580 I02 | X |  | 435  | 440  | -0.54545823 | 434  | 440  | -0.6280403  | 3212674  | 0.34575347  | 2650882  | -0.32290687 | experimental | ChemBridge | 5304264 |
| 1580 I03 | X |  | 515  | 520  | -0.25602713 | 435  | 440  | -0.62431883 | 3139521  | 0.21259216  | 3037865  | 0.43110825  | experimental | ChemBridge | 5276083 |
| 1580 I04 | X |  | 553  | 560  | -0.11854736 | 434  | 440  | -0.6280403  | 3615473  | 1.07897347  | 3292043  | 0.92636012  | experimental | ChemBridge | 5306021 |
| 1580 I05 | X |  | 554  | 560  | -0.11492947 | 434  | 440  | -0.6280403  | 3117821  | 0.17309139  | 2878128  | 0.11986998  | experimental | ChemBridge | 5278212 |
| 1580 I06 | X |  | 875  | 880  | 1.04641261  | 873  | 880  | 1.00568454  | 3699062  | 1.23113156  | 3761847  | 1.85382276  | experimental | ChemBridge | 5312613 |
| 1580 I07 | X |  | 273  | 280  | 1.1315562   | 393  | 400  | -0.78062053 | 3114747  | 0.16749575  | 3048419  | 0.45167214  | experimental | ChemBridge | 5242864 |
| 1580 I08 | X |  | 556  | 560  | -0.10769369 | 555  | 560  | -0.1774256  | 3838299  | 1.48458639  | 3452725  | 1.23944017  | experimental | ChemBridge | 5313915 |
| 1580 I09 | X |  | 395  | 400  | -0.69017378 | 434  | 440  | -0.6280403  | 3355785  | 0.6062602   | 2989574  | 0.33701589  | experimental | ChemBridge | 5243599 |
| 1580 I10 | X |  | 392  | 400  | -0.70102744 | 632  | 640  | 0.10881054  | 2711925  | -0.56576612 | 2433241  | -0.74696684 | experimental | ChemBridge | 5315243 |
| 1580 I11 | X |  | 474  | 480  | -0.40436057 | 432  | 440  | -0.63548324 | 3147430  | 0.22698901  | 3080756  | 0.5279674   | experimental | ChemBridge | 5244651 |
| 1580 I12 | X |  | 1071 | 1080 | 1.755519    | 1513 | 1520 | 3.38742464  | 2779088  | -0.44350848 | 2558612  | -0.50268989 | experimental | ChemBridge | 5316794 |
| 1580 I13 | X |  | 1393 | 1400 | 2.92047917  | 912  | 920  | 1.15082183  | 3327148  | 0.55413191  | 2511863  | -0.59377775 | experimental | ChemBridge | 5245438 |
| 1580 I14 | X |  | 392  | 400  | -0.70102744 | 433  | 440  | -0.63176177 | 3410746  | 0.706330638 | 3134578  | 0.61954822  | experimental | ChemBridge | 5258729 |
| 1580 I15 | X |  | 435  | 440  | -0.54545823 | 553  | 560  | -0.1851855  | 3598191  | 1.04751483  | 2995441  | 0.34844742  | experimental | ChemBridge | 5246601 |
| 1580 I16 | X |  | 314  | 320  | -0.98322276 | 394  | 400  | -0.77689906 | 3533297  | 0.92938748  | 3042245  | 0.43964244  | experimental | ChemBridge | 5258043 |
| 1580 I17 | X |  | 394  | 400  | -0.69379167 | 554  | 560  | -0.18146403 | 3296252  | 0.49789154  | 3133264  | 0.61698796  | experimental | ChemBridge | 5320122 |
| 1580 I18 | X |  | 515  | 520  | -0.25602713 | 674  | 680  | 0.26511223  | 3025421  | 0.00489453  | 2563681  | -0.49281322 | experimental | ChemBridge | 5257213 |
| 1580 I19 | X |  | 594  | 600  | 0.02978608  | 392  | 400  | -0.78434199 | 2251638  | -1.40363223 | 2171107  | -1.25777221 | experimental | ChemBridge | 5302449 |
| 1580 I20 | X |  | 393  | 400  | 0.02616819  | 752  | 760  | 0.55530681  | 3108684  | 0.15645919  | 3612109  | 0.36143965  | experimental | ChemBridge | 5256357 |
| 1580 I21 | X |  | 394  | 400  | -0.69379167 | 514  | 520  | -0.32032279 | 3150393  | 0.23238227  | 28513026 | 0.06760829  | experimental | ChemBridge | 5301365 |
| 1580 I22 | X |  | 592  | 600  | 0.0225503   | 749  | 760  | 0.5442224   | 5024174  | 3.6432493   | 5150770  | 4.54798757  | experimental | ChemBridge | 5309245 |
| 1580 I23 | N |  | 354  | 360  | -0.83850722 | 433  | 440  | -0.63176177 | 2774053  | -0.45267375 | 2600343  | -0.42137933 | empty        |            |         |
| 1580 I24 | P |  | 516  | 520  | -0.25240924 | 675  | 680  | 0.2688337   | 2568697  | -0.82648581 | 2632449  | -0.35882255 | empty        |            |         |
| 1580 J01 | X |  | 516  | 520  | -0.25240924 | 395  | 400  | -0.77317759 | 2746501  | -0.502827   | 2541945  | -0.53516463 | experimental | ChemBridge | 5308438 |
| 1580 J02 | X |  | 395  | 400  | -0.69017378 | 315  | 320  | -1.0708951  | 3278409  | 0.46541171  | 2865499  | 0.09526257  | experimental | ChemBridge | 5340140 |
| 1580 J03 | X |  | 473  | 480  | -0.40797846 | 234  | 240  | -1.37233408 | 2945027  | -0.14144767 | 2821417  | 0.00937121  | experimental | ChemBridge | 5307139 |
| 1580 J04 | X |  | 593  | 600  | 0.02616819  | 435  | 440  | -0.25964502 | 3177715  | 0.2811575   | 2761847  | 0.35184356  | experimental | ChemBridge | 5295246 |
| 1580 J05 | X |  | 313  | 320  | -0.98684065 | 352  | 360  | -0.9320075  | 3320860  | 0.54268579  | 3154699  | 0.65875288  | experimental | ChemBridge | 5285136 |
| 1580 J06 | X |  | 714  | 720  | 0.46393272  | 1114 | 1120 | 1.90255855  | 3429248  | 0.7399858   | 3723072  | 1.76619645  | experimental | ChemBridge | 5311281 |
| 1580 J07 | X |  | 475  | 480  | -0.40074268 | 353  | 360  | -0.92947928 | 3478921  | 0.83040618  | 2830310  | 0.02669873  | experimental | ChemBridge | 5283883 |
| 1580 J08 | X |  | 435  | 440  | -0.54545823 | 434  | 440  | -0.6280403  | 3818143  | 1.44789671  | 3396220  | 1.12934328  | experimental | ChemBridge | 5319266 |
| 1580 J09 | X |  | 433  | 440  | -0.55269401 | 353  | 360  | -0.92947928 | 3952283  | 1.69207287  | 3145287  | 0.64041412  | experimental | ChemBridge | 5282070 |
| 1580 J10 | X |  | 1155 | 1160 | 2.05942165  | 1035 | 1040 | 1.6085265   | 3758021  | 1.33845535  | 3585890  | 1.49890486  | experimental | ChemBridge | 5286753 |
| 1580 J11 | X |  | 593  | 600  | 0.02616819  | 392  | 400  | -0.70102744 | 35212581 | 0.90251229  | 32088101 | 0.59478344  | experimental | ChemBridge | 5279836 |
| 1580 J12 | X |  | 593  | 600  | 0.02616819  | 435  | 440  | -0.48662448 | 3291824  | 0.4898312   | 2997184  | 0.35184356  | experimental | ChemBridge | 5295246 |
| 1580 J13 | X |  | 431  | 440  | -0.55992978 | 433  | 440  | -0.63176177 | 3462678  | 0.80083884  | 3024361  | 0.40479645  | experimental | ChemBridge | 5328734 |
| 1580 J14 | X |  | 555  | 560  | -0.11131158 | 473  | 480  | -0.48290301 | 3140719  | 0.2147729   | 2887315  | 0.13776985  | experimental | ChemBridge | 5340566 |
| 1580 J15 | X |  | 553  | 560  | -0.11854736 | 953  | 960  | 1.30340206  | 2758886  | -0.48028243 | 2708294  | -0.21104274 | experimental | ChemBridge | 5325862 |
| 1580 J16 | X |  | 754  | 760  | 0.60864827  | 634  | 640  | 0.11625348  | 2456661  | -1.03042633 | 2142084  | -1.31427182 | experimental | ChemBridge | 5341593 |
| 1580 J17 | X |  | 515  | 520  | -0.25602713 | 434  | 440  | -0.6280403  | 3636020  | 1.11637907  | 3462206  | 1.25791338  | experimental | ChemBridge | 5321443 |
| 1580 J18 | X |  | 195  | 200  | -1.41375152 | 554  | 560  | -0.18146403 | 2860545  | -0.29252129 | 3617292  | 0.16772914  | experimental | ChemBridge | 5330391 |
| 1580 J19 | X |  | 475  | 480  | -0.40074268 | 354  | 360  | -0.92947928 | 32877029 | 2.63252527  | 2638726  | -0.34659217 | experimental | ChemBridge | 5320163 |
| 1580 J20 | X |  | 554  | 560  | -0.11492947 | 554  | 560  | -0.18146403 | 3126676  | 0.18921025  | 2843524  | 0.05244549  | experimental | ChemBridge | 5333336 |
| 1580 J21 | X |  | 391  | 400  | -0.70464533 | 268  | 280  | -1.24580414 | 2941416  | -0.14802081 | 2930687  | 0.2222778   | experimental | ChemBridge | 5340221 |
| 1580 J22 | X |  | 1154 | 1160 | 2.05580376  | 1755 | 1760 | 4.28802011  | 2748500  | -0.49918819 | 3017340  | 0.39111641  | experimental | ChemBridge | 5337160 |
| 1580 J23 | N |  | 552  | 560  | -0.12216525 | 430  | 440  | -0.64292618 | 2675164  | -0.63268262 | 3141546  | 0.63312498  | empty        |            |         |
| 1580 J24 | P |  | 515  | 520  | -0.25602713 | 795  | 800  | 0.71540997  | 2781855  | -0.43847167 | 2968882  | 0.29669866  | empty        |            |         |
| 1580 K01 | X |  | 596  | 600  | 0.03702186  | 756  | 760  | 0.57027268  | 2856176  | -0.30318424 | 2682870  | -0.26059001 | experimental | ChemBridge | 5274996 |
| 1580 K02 | X |  | 434  | 440  | -0.54907612 | 513  | 520  | -0.33404426 | 3249159  | 0.41216757  | 2917263  | 0.19612188  | experimental | ChemBridge | 5304275 |
| 1580 K03 | X |  | 832  | 840  | 0.89084359  | 714  | 720  | 0.41397099  | 2960821  | -0.11269765 | 2614203  | -0.39437388 | experimental | ChemBridge | 5276323 |
| 1580 K04 | X |  | 713  | 720  | 0.46031484  | 752  | 760  | 0.55538681  | 2636023  | -0.70393146 | 2406513  | -0.79904644 | experimental | ChemBridge | 5306444 |
| 1580 K05 | X |  | 635  | 640  | 0.17811952  | 875  | 880  | 1.01312748  | 3212152  | 0.34480327  | 3276595  | 0.89626054  | experimental | ChemBridge | 5278376 |
| 1580 K06 | X |  | 513  | 520  | -0.26326291 | 312  | 320  | -1.08205951 | 3530488  | 0.92427422  | 3068740  | 0.49126649  | experimental | ChemBridge | 5312990 |
| 1580 K07 | X |  | 395  | 400  | -0.69017378 | 474  | 480  | -0.47918154 | 3334208  | 0.56698332  | 3495177  | 1.32215556  | experimental | ChemBridge | 5243157 |
| 1580 K08 | X |  | 314  | 320  | -0.98322276 | 632  | 640  | 0.10881054  | 3955238  | 1.6974519   | 3647287  | 1.61853354  | experimental | ChemBridge | 5313916 |
| 1580 K09 | X |  | 355  | 360  | -0.83488933 | 475  | 480  | -0.47546008 | 3518534  | 0.90251421  | 3231703  | 0.80879094  | experimental | ChemBridge | 5243608 |
| 1580 K10 | X |  | 472  | 480  | -0.41159635 | 232  | 240  | -1.37977702 | 3636558  | 1.11735476  | 3742357  | 1.80377221  | experimental | ChemBridge | 5315464 |
| 1580 K11 | X |  | 595  | 600  | 0.03340397  | 675  | 680  | 0.2688337   | 3629908  | 1.10524968  | 3291919  | 0.92611851  | experimental | ChemBridge | 5244667 |
| 1580 K12 | X |  | 393  | 400  | -0.69740956 | 513  | 520  | -0.33404426 | 3659321  | 1.15879053  | 3623008  | 0.57122724  | experimental | ChemBridge | 5316930 |
| 1580 K13 | X |  | 555  | 560  | -0.11131158 | 474  | 480  | -0.47918154 | 3566930  | 0.99061005  | 3390882  | 1.11894248  | experimental | ChemBridge | 5245612 |
| 1580 K14 | X |  | 474  | 480  | -0.40436057 | 554  | 560  | -0.18146403 | 3521502  | 0.9079169   | 3561795  | 1.45195707  | experimental | ChemBridge | 5258922 |
| 1580 K15 | X |  | 553  | 560  | -0.11854736 | 633  | 640  | 0.11253201  | 3363710  | 0.62068617  | 3561509  | 1.45139982  | experimental | ChemBridge | 5248293 |
| 1580 K16 | X |  | 280  | 280  | 0.31559929  | 273  | 280  | -1.22719679 | 4011463  | 1.79780896  | 1078252  | 0.50960526  | experimental | ChemBridge | 5258151 |
| 1580 K17 | X |  | 432  | 440  | -0.55631919 | 393  | 400  | -0.78062053 | 3390592  | 0.66961981  | 3227566  | 0.80073023  | experimental | ChemBridge | 5302073 |
| 1580 K18 | X |  | 316  | 320  | -0.97598699 | 434  | 440  | -0.6280403  | 3843192  | 1.49349318  | 3501144  | 1.33378193  | experimental | ChemBridge | 5257243 |
| 1580 K19 | X |  | 313  | 320  | -0.98684065 | 473  | 480  | -0.48290301 | 3238290  | 0.3923826   | 3485783  | 1.30385187  | experimental | ChemBridge | 5302483 |
| 1580 K20 | X |  | 473  | 480  | -0.40797846 | 552  | 560  | -0.18890697 | 4430638  | 2.56282839  | 3543231  | 1.41578614  | experimental | ChemBridge | 5256383 |
| 1580 K21 | X |  | 1074 | 1080 | 1.76637266  | 1    |      |             |          |             |          |             |              |            |         |







|          |   |  |        |        |             |      |      |             |         |              |         |             |              |            |         |
|----------|---|--|--------|--------|-------------|------|------|-------------|---------|--------------|---------|-------------|--------------|------------|---------|
| 1581 D01 | X |  | 912    | 920    | -0.56956786 | 594  | 600  | -0.90892926 | 2514905 | -1.14558639  | 2348992 | -1.41874639 | experimental | ChemBridge | 5420788 |
| 1581 D02 | X |  | 990    | 1000   | -0.33266718 | 593  | 600  | -0.91300574 | 3057054 | -0.12554239  | 3222414 | 0.22915508  | experimental | ChemBridge | 5466967 |
| 1581 D03 | X |  | 907    | 920    | -0.5847538  | 589  | 600  | -0.92931169 | 3305113 | 0.34117634   | 3287933 | 0.35277099  | experimental | ChemBridge | 5421190 |
| 1581 D04 | X |  | 909    | 920    | -0.57867942 | 753  | 600  | -0.92076794 | 3899301 | 1.45913082   | 3772036 | 1.26613708  | experimental | ChemBridge | 5490085 |
| 1581 D05 | X |  | 989    | 1000   | -0.33570436 | 592  | 600  | -0.91708223 | 3585011 | 0.86783272   | 3550365 | 0.68856406  | experimental | ChemBridge | 5421546 |
| 1581 D06 | X |  | 1228   | 1240   | 0.39018363  | 632  | 640  | -0.75402278 | 3061884 | -0.11645483  | 2844985 | -0.48294721 | experimental | ChemBridge | 5492700 |
| 1581 D07 | X |  | 1269   | 1280   | 0.51470834  | 831  | 840  | 0.05719799  | 3549078 | 0.80019229   | 3865942 | 1.44331127  | experimental | ChemBridge | 5422161 |
| 1581 D08 | X |  | 988    | 1000   | -0.33874155 | 831  | 840  | 0.05719799  | 3675293 | 1.03766363   | 3389668 | 0.5447163   | experimental | ChemBridge | 5510924 |
| 1581 D09 | X |  | 987    | 1000   | -0.34177874 | 709  | 720  | -0.44013333 | 3774079 | 1.22352779   | 3233089 | 0.2492958   | experimental | ChemBridge | 5423411 |
| 1581 D10 | X |  | 1670   | 1680   | 1.73262083  | 1631 | 1640 | 3.31838703  | 3269218 | 0.27364052   | 3558541 | 0.86333211  | experimental | ChemBridge | 5511114 |
| 1581 D11 | X |  | 748    | 760    | -1.06766673 | 990  | 1000 | 0.70535932  | 4214434 | 2.05204813   | 3258260 | 0.29678639  | experimental | ChemBridge | 5424337 |
| 1581 D12 | X |  | 950    | 960    | -0.45415471 | 671  | 680  | -0.59503981 | 3855693 | 1.37708312   | 3393364 | 1.66235552  | experimental | ChemBridge | 5511490 |
| 1581 D13 | X |  | 870    | 880    | -0.69712977 | 512  | 520  | -1.24320113 | 2617381 | -0.95277956  | 2936598 | -0.31009926 | experimental | ChemBridge | 5425267 |
| 1581 D14 | X |  | 828    | 840    | -0.82469167 | 753  | 760  | -0.26076794 | 3634384 | 0.96069405   | 3366535 | 0.50107084  | experimental | ChemBridge | 5352866 |
| 1581 D15 | X |  | 1110   | 1120   | 0.03179541  | 751  | 760  | -0.26892091 | 3863975 | 1.39266556   | 3539929 | 0.82821651  | experimental | ChemBridge | 5460975 |
| 1581 D16 | X |  | 829    | 840    | -0.82165448 | 791  | 800  | -0.10586146 | 2880435 | -0.457848    | 3294706 | 0.36554973  | experimental | ChemBridge | 5353999 |
| 1581 D17 | X |  | 950    | 960    | -0.45415471 | 590  | 600  | -0.92523252 | 3656361 | 1.0020434    | 3835601 | 1.38606634  | experimental | ChemBridge | 5462629 |
| 1581 D18 | X |  | 789    | 800    | -0.94314201 | 712  | 720  | -0.42790387 | 3501355 | 0.71040228   | 3136507 | 0.06707275  | experimental | ChemBridge | 5354186 |
| 1581 D19 | X |  | 708    | 720    | -1.18915426 | 673  | 680  | -0.58686864 | 3709383 | 1.10180338   | 3380332 | 0.52710189  | experimental | ChemBridge | 5465177 |
| 1581 D20 | X |  | 949    | 960    | -0.45719189 | 551  | 560  | -1.08421817 | 3582679 | 0.86341199   | 3270348 | 0.31959304  | experimental | ChemBridge | 5354801 |
| 1581 D21 | X |  | 948    | 960    | -0.46022908 | 672  | 680  | -0.59063333 | 3221680 | 0.18419859   | 2898922 | -0.38118327 | experimental | ChemBridge | 5466114 |
| 1581 D22 | X |  | 1188   | 1200   | 0.2686961   | 672  | 680  | -0.59063333 | 3209087 | 0.16050508   | 3057420 | -0.08214216 | empty        | ChemBridge | 5355791 |
| 1581 D23 | N |  | 1027   | 1040   | -0.22029121 | 709  | 720  | -0.44013333 | 3429820 | 0.57581041   | 3122892 | 0.04138508  | empty        |            |         |
| 1581 D24 | P |  | 1107   | 1120   | 0.02268385  | 474  | 480  | -1.39810761 | 2964223 | -0.30020232  | 2736555 | -0.6875241  | empty        |            |         |
| 1581 E01 | X |  | 911    | 920    | -0.57260505 | 754  | 760  | -0.25669145 | 2639734 | -0.91072278  | 2645705 | -0.85893247 | experimental | ChemBridge | 5339434 |
| 1581 E02 | X |  | 857    | 860    | -0.70762416 | 659  | 660  | -0.60319227 | 3288252 | 0.30945266   | 3393484 | 0.48689269  | experimental | ChemBridge | 5428268 |
| 1581 E03 | X |  | 1469   | 1480   | 1.12145999  | 1512 | 1520 | 2.8338266   | 2285643 | -0.35397576  | 3220774 | 0.22660806  | experimental | ChemBridge | 5322150 |
| 1581 E04 | X |  | 947    | 960    | -0.46326627 | 710  | 720  | -0.43605685 | 3163201 | 0.07417136   | 3885992 | 1.48113998  | experimental | ChemBridge | 5406722 |
| 1581 E05 | X |  | 789    | 800    | -0.94314201 | 712  | 720  | -0.42790387 | 3531079 | 0.76632748   | 3424961 | 0.61130425  | experimental | ChemBridge | 5324012 |
| 1581 E06 | X |  | 909    | 920    | -0.57867942 | 712  | 720  | -0.42790387 | 3423181 | 0.56331925   | 2876568 | -0.42335898 | experimental | ChemBridge | 5411311 |
| 1581 E07 | X |  | 868    | 880    | -0.70320414 | 671  | 680  | -0.59503981 | 3494167 | 0.69687819   | 3170013 | 0.13028914  | experimental | ChemBridge | 5325325 |
| 1581 E08 | X |  | 988    | 1000   | -0.33874155 | 712  | 720  | -0.42790387 | 3586293 | 0.87021167   | 3601397 | 0.94418932  | experimental | ChemBridge | 5429930 |
| 1581 E09 | X |  | 1068   | 1080   | -0.09576649 | 592  | 600  | -0.91708223 | 2784482 | -0.63838191  | 1654745 | -2.78595906 | experimental | ChemBridge | 5425850 |
| 1581 E10 | X |  | 1006   | 1020   | -0.34815933 | 673  | 680  | -0.58233502 | 3495926 | -0.5884576   | 3393952 | 0.29593392  | experimental | ChemBridge | 5430539 |
| 1581 E11 | X |  | 948    | 960    | -0.46022908 | 510  | 520  | -1.25135411 | 3749179 | 1.17667887   | 4115492 | 1.91414188  | experimental | ChemBridge | 5426756 |
| 1581 E12 | X |  | 987    | 1000   | -0.34177874 | 792  | 800  | -0.10178497 | 3408744 | 0.53615628   | 3800592 | 1.32001422  | experimental | ChemBridge | 5431283 |
| 1581 E13 | X |  | 1068   | 1080   | -0.09576649 | 512  | 520  | -1.24320113 | 2967764 | -0.29353999  | 3342035 | 0.45484623  | experimental | ChemBridge | 5427607 |
| 1581 E14 | X |  | 1308   | 1320   | 0.63315868  | 591  | 600  | -0.92115872 | 4027610 | 1.700542     | 3566030 | 0.86727347  | experimental | ChemBridge | 5431860 |
| 1581 E15 | X |  | 947    | 960    | -0.46326627 | 992  | 1000 | 0.71351229  | 3642977 | 0.97686164   | 3123082 | 0.04174355  | experimental | ChemBridge | 5428236 |
| 1581 E16 | X |  | 1029   | 1040   | -0.21421684 | 871  | 880  | 0.22025745  | 2185921 | -1.76456412  | 2261224 | -1.5843399  | experimental | ChemBridge | 5452138 |
| 1581 E17 | X |  | 947    | 960    | -0.46022908 | 551  | 560  | -0.46022908 | 3169468 | 0.08596261   | 3258364 | 0.22323068  | experimental | ChemBridge | 5428268 |
| 1581 E18 | X |  | 1149   | 1160   | 0.15024575  | 913  | 920  | -0.39146987 | 3387258 | 0.49573072   | 3258815 | 0.95217336  | experimental | ChemBridge | 5451720 |
| 1581 E19 | X |  | 1228   | 1240   | 0.39018363  | 471  | 480  | -1.41033707 | 3515058 | 0.73618424   | 3055850 | -0.08510431 | experimental | ChemBridge | 5404196 |
| 1581 E20 | X |  | 1107   | 1120   | 0.02268385  | 912  | 920  | 0.38739338  | 3521479 | 0.74826524   | 3726109 | 1.17948576  | experimental | ChemBridge | 5417152 |
| 1581 E21 | X |  | 1109   | 1120   | 0.02875822  | 791  | 800  | -0.10586146 | 3396688 | 0.51347313   | 3049103 | -0.097834   | experimental | ChemBridge | 5404694 |
| 1581 E22 | X |  | 987    | 1000   | -0.34177874 | 712  | 720  | -0.42790387 | 3129779 | 0.01128844   | 2923658 | -0.3345134  | experimental | ChemBridge | 5419706 |
| 1581 E23 | N |  | 1261   | 1280   | 0.49041084  | 672  | 680  | -0.59063333 | 3311119 | 0.35247653   | 3175171 | 0.14002083  | empty        |            |         |
| 1581 E24 | P |  | 1765   | 1780   | 0.02115371  | 712  | 720  | -0.42790387 | 2811076 | -0.5884576   | 3165453 | 0.73017067  | empty        |            |         |
| 1581 F01 | X |  | 1351   | 1360   | 0.76373778  | 673  | 680  | -0.58686864 | 2489526 | -0.490181276 | 2686231 | -0.50104442 | experimental | ChemBridge | 5420812 |
| 1581 F02 | X |  | 1107   | 1120   | 0.02268385  | 831  | 840  | 0.05719799  | 3121827 | -0.00367311  | 3059274 | -0.07779516 | experimental | ChemBridge | 5467378 |
| 1581 F03 | X |  | 1146   | 1160   | 0.14113419  | 869  | 880  | 0.21210447  | 3386249 | 0.49383233   | 3802086 | 1.32283297  | experimental | ChemBridge | 5421199 |
| 1581 F04 | X |  | 1147   | 1160   | 0.14417138  | 511  | 520  | -1.24727762 | 3325065 | 0.37871569   | 3305668 | 0.38623194  | experimental | ChemBridge | 5490688 |
| 1581 F05 | X |  | 828    | 840    | -0.82469167 | 633  | 640  | -0.74994629 | 3471510 | 0.65424943   | 3807050 | 1.33219864  | experimental | ChemBridge | 5421562 |
| 1581 F06 | X |  | 908    | 920    | -0.58171661 | 632  | 640  | -0.75402278 | 2576642 | -1.02942929  | 2953646 | -0.27793449 | experimental | ChemBridge | 5493232 |
| 1581 F07 | X |  | 989    | 1000   | -0.33570436 | 752  | 760  | -0.26484442 | 3227103 | 0.19440187   | 4054016 | 1.79815397  | experimental | ChemBridge | 5424317 |
| 1581 F08 | X |  | 1028   | 1040   | -0.21725402 | 752  | 760  | -0.26484442 | 3364963 | 0.45378309   | 3928552 | 1.5582313   | experimental | ChemBridge | 5510934 |
| 1581 F09 | X |  | 1068   | 1080   | -0.09576649 | 712  | 720  | -0.42790387 | 3933931 | 1.52428657   | 4449226 | 2.543804    | experimental | ChemBridge | 5423531 |
| 1581 F10 | X |  | 948    | 960    | -0.46022908 | 552  | 560  | -1.08014168 | 3845018 | 1.3569983    | 3820413 | 1.35741086  | experimental | ChemBridge | 5511229 |
| 1581 F11 | X |  | 1307   | 1320   | 0.6301215   | 952  | 960  | 0.55045284  | 4042833 | 1.72918381   | 3428020 | 0.61707572  | experimental | ChemBridge | 5424487 |
| 1581 F12 | X |  | 1387   | 1400   | 0.87309656  | 950  | 960  | 0.54229986  | 3882022 | 1.42662068   | 3680169 | 1.09280991  | experimental | ChemBridge | 5511518 |
| 1581 F13 | X |  | 907    | 920    | -0.5847538  | 831  | 840  | 0.05719799  | 3678041 | 1.04283395   | 3685085 | 1.10208502  | experimental | ChemBridge | 5425281 |
| 1581 F14 | X |  | 1107   | 1120   | 0.02268385  | 872  | 880  | 0.22433393  | 3657175 | 1.00357493   | 3743929 | 1.21310708  | experimental | ChemBridge | 5353414 |
| 1581 F15 | X |  | 1147   | 1160   | 0.14417138  | 671  | 680  | -0.59503981 | 3021737 | -0.19199072  | 2643486 | -0.8631191  | experimental | ChemBridge | 5461285 |
| 1581 F16 | X |  | 1068   | 1080   | -0.09576649 | 631  | 640  | -0.75809926 | 3587277 | 0.87206305   | 3858939 | 1.43009858  | experimental | ChemBridge | 5354009 |
| 1581 F17 | X |  | 1029   | 1040   | -0.21421684 | 752  | 760  | -0.26484442 | 3882997 | 1.42845513   | 3890630 | 1.48989058  | experimental | ChemBridge | 5462997 |
| 1581 F18 | X |  | 907    | 920    | -0.5847538  | 591  | 600  | -0.92115872 | 3466209 | 0.64427569   | 3184349 | 0.15733714  | experimental | ChemBridge | 5354200 |
| 1581 F19 | X |  | 1107   | 1120   | 0.02268385  | 672  | 680  | -0.59063333 | 3749908 | 1.17805047   | 3535190 | 0.81927535  | experimental | ChemBridge | 5465194 |
| 1581 F20 | X |  | 1227   | 1240   | 0.38714644  | 952  | 960  | 0.55045284  | 3770293 | 1.2164045    | 3098357 | -0.00490556 | experimental | ChemBridge | 5356343 |
| 1581 F21 | X |  | 867    | 880    | -0.70624133 | 711  | 720  | -0.43198036 | 3202996 | 0.14904497   | 2808895 | -0.55092379 | experimental | ChemBridge | 5468348 |
| 1581 F22 | X |  | 904    | 920    | -0.59386537 | 669  | 680  | -0.60319227 | 2904790 | -0.41202448  | 3265633 | 0.73613833  | experimental | ChemBridge | 5355808 |
| 1581 F23 | N |  | 1443   | 1460   | 1.04317921  | 632  | 640  | -0.75402278 | 3490721 | 1.6903946    | 3366521 | -0.50104442 | empty        |            |         |
| 1581 F24 | P |  | 203061 | 203080 | 613.394998  | 671  | 680  | -0.59503981 | 3193139 | 0.13049919   | 2719370 | -0.71994735 | empty        |            |         |
| 1581 G01 | X |  | 909    | 920    | -0.57867942 | 914  | 920  | 0.39554636  | 2887649 | -0.44427498  | 2854216 | -0.46553091 | experimental | ChemBridge | 5339462 |
| 1581 G02 | X |  | 1188   | 1200   | 0.2686961   | 750  | 760  | -0.2729974  | 2517286 | -1.14110658  | 2823681 | -0.52314186 | experimental | ChemBridge | 5405    |

|          |   |      |      |             |        |        |             |         |             |           |             |              |            |         |
|----------|---|------|------|-------------|--------|--------|-------------|---------|-------------|-----------|-------------|--------------|------------|---------|
| 1581 G19 | X | 1027 | 1040 | -0.22029121 | 672    | 680    | -0.59096333 | 2926508 | -0.37116244 | 2739063   | -0.68279221 | experimental | ChemBridge | 5404210 |
| 1581 G20 | X | 1267 | 1280 | 0.50863397  | 511    | 520    | -1.24727762 | 3329582 | 0.38721434  | 3100461   | -0.00093591 | experimental | ChemBridge | 5417796 |
| 1581 G21 | X | 1024 | 1040 | -0.22940278 | 708    | 720    | -0.44420982 | 3423047 | 0.56306713  | 3089573   | -0.0214785  | experimental | ChemBridge | 5404743 |
| 1581 G22 | X | 1660 | 1680 | 1.72654665  | 1631   | 1640   | 3.31838703  | 3304988 | 0.34094304  | 2783777   | -0.68144509 | experimental | ChemBridge | 5419872 |
| 1581 G23 | N | 1060 | 1080 | -0.120064   | 705    | 720    | -0.45643928 | 3285748 | 0.30473767  | 3119864   | 0.03567209  | empty        |            |         |
| 1581 G24 | P | 1446 | 2040 | 1.05229066  | 1186   | 1600   | 1.50435063  | 2999750 | -0.23335888 | 2624524   | -0.89889506 | empty        |            |         |
| 1581 H01 | X | 1107 | 1120 | 0.02268385  | 711    | 720    | -0.43198036 | 2791940 | -0.62434981 | 2800362   | -0.56713825 | experimental | ChemBridge | 5420834 |
| 1581 H02 | X | 1106 | 1120 | 0.01964666  | 671    | 680    | -0.59503981 | 2826029 | -0.56021195 | 2959588   | -0.26621419 | experimental | ChemBridge | 5467386 |
| 1581 H03 | X | 1306 | 1320 | 0.6301215   | 710    | 720    | -0.43605685 | 3167152 | 0.0816051   | 3779760   | 1.2807101   | experimental | ChemBridge | 5421235 |
| 1581 H04 | X | 1385 | 1400 | 0.86702218  | 830    | 840    | 0.05312151  | 3185164 | 0.11549437  | 3243875   | 0.26964594  | experimental | ChemBridge | 5490854 |
| 1581 H05 | X | 1102 | 1120 | 0.00749791  | 792    | 800    | -0.10178497 | 3404213 | 0.52763128  | 3745423   | 1.21592584  | experimental | ChemBridge | 5412697 |
| 1581 H06 | X | 1306 | 1320 | 0.62708471  | 711    | 720    | -0.43198036 | 3781735 | 1.23793242  | 3373053   | 0.51495331  | experimental | ChemBridge | 5493249 |
| 1581 H07 | X | 1185 | 1200 | 0.25958453  | 910    | 920    | 0.37924041  | 3188593 | 0.1407608   | 3295533   | 0.36711005  | experimental | ChemBridge | 5422355 |
| 1581 H08 | X | 1587 | 1600 | 1.4805342   | 1112   | 1120   | 1.20269064  | 4269373 | 2.15541491  | 4175484   | 2.0273299   | experimental | ChemBridge | 5510936 |
| 1581 H09 | X | 1025 | 1040 | -0.22636559 | 630    | 640    | -0.76217575 | 3124592 | 0.00152919  | 2987930   | -0.21325023 | experimental | ChemBridge | 5423562 |
| 1581 H10 | X | 1229 | 1240 | 0.39322081  | 792    | 800    | -0.10178497 | 2912564 | -0.39739784 | 3236187   | 0.25514085  | experimental | ChemBridge | 5511232 |
| 1581 H11 | X | 787  | 800  | -0.94921639 | 870    | 880    | 0.22025745  | 3707190 | 1.09767729  | 3414598   | 0.59175219  | experimental | ChemBridge | 5424584 |
| 1581 H12 | X | 1068 | 1080 | -0.09576649 | 831    | 840    | 0.05312151  | 3440928 | 0.59670992  | 3928359   | 1.56107458  | experimental | ChemBridge | 5511528 |
| 1581 H13 | X | 1108 | 1120 | 0.02572104  | 751    | 760    | -0.26892091 | 3061022 | 1.38710935  | 3450710   | 0.65888537  | experimental | ChemBridge | 5425369 |
| 1581 H14 | X | 1108 | 1120 | 0.02572104  | 791    | 800    | -0.10586146 | 3562938 | 0.82626964  | 3741937   | 1.20934874  | experimental | ChemBridge | 5353428 |
| 1581 H15 | X | 987  | 1000 | -0.34177874 | 791    | 800    | -0.10586146 | 1927261 | -2.25122845 | 1893801   | -2.27756367 | experimental | ChemBridge | 5461568 |
| 1581 H16 | X | 1029 | 1040 | -0.21421684 | 711    | 720    | -0.43198036 | 2877267 | -0.46380853 | 3096573   | -0.00827147 | experimental | ChemBridge | 5354205 |
| 1581 H17 | X | 867  | 880  | -0.70624133 | 831    | 840    | 0.05719799  | 3792610 | 1.25839355  | 3056422   | -0.0840251  | experimental | ChemBridge | 5463110 |
| 1581 H18 | X | 987  | 1000 | -0.34177874 | 751    | 760    | -0.26892091 | 3736536 | 1.15289128  | 3381462   | 0.52923388  | experimental | ChemBridge | 5354336 |
| 1581 H19 | X | 907  | 920  | -0.5847538  | 952    | 960    | 0.55045284  | 3728197 | 1.1372016   | 3801696   | 1.32209715  | experimental | ChemBridge | 5465378 |
| 1581 H20 | X | 1226 | 1240 | 0.38410925  | 830    | 840    | 0.05312151  | 3201596 | 0.14641089  | 3261766   | 0.22449814  | experimental | ChemBridge | 5355027 |
| 1581 H21 | X | 1587 | 1600 | 1.4805342   | 1310   | 1320   | 2.00983493  | 2071568 | -1.9797322  | 1793402   | -2.46698933 | experimental | ChemBridge | 5466418 |
| 1581 H22 | X | 1024 | 1040 | -0.22940278 | 904    | 920    | 0.35478149  | 2761353 | -0.68189873 | 2937731   | -0.30796161 | experimental | ChemBridge | 5355880 |
| 1581 H23 | N | 1147 | 1160 | 0.14417138  | 1023   | 1440   | 0.83988336  | 3337633 | 0.40236216  | 3026945   | -0.13963991 | empty        |            |         |
| 1581 H24 | P | 1147 | 1160 | 0.14417138  | 141427 | 141440 | 573.194865  | 2645069 | -0.90068507 | 2919877   | -0.34164708 | empty        |            |         |
| 1581 I01 | X | 2309 | 2320 | 3.67338412  | 1393   | 1400   | 2.34818329  | 2579121 | -1.02476509 | 2565725   | -1.00983222 | experimental | ChemBridge | 5339508 |
| 1581 I02 | X | 1024 | 1040 | -0.22940278 | 749    | 760    | -0.27707388 | 2924980 | -0.37403735 | 3178192   | 0.14572061  | experimental | ChemBridge | 5406174 |
| 1581 I03 | X | 946  | 960  | -0.46630346 | 871    | 880    | 0.22025745  | 3008426 | -0.21703513 | 3273146   | 0.32487208  | experimental | ChemBridge | 5322281 |
| 1581 I04 | X | 1072 | 1080 | -0.09576649 | 830    | 840    | 0.05312151  | 4748892 | 1.70744381  | 3234286   | 0.23249814  | experimental | ChemBridge | 5410408 |
| 1581 I05 | X | 2347 | 2360 | 3.78879727  | 671    | 680    | -0.59503981 | 3482627 | 0.67516587  | 3039327   | -0.12646684 | experimental | ChemBridge | 5324067 |
| 1581 I06 | X | 1102 | 1120 | 0.00749791  | 631    | 640    | -0.75809926 | 3647055 | 0.98453432  | 3369374   | 0.50642723  | experimental | ChemBridge | 5411728 |
| 1581 I07 | X | 1266 | 1280 | 0.50559678  | 911    | 920    | 0.3833169   | 3678076 | 1.0428998   | 3253192   | 0.2872245   | experimental | ChemBridge | 5325563 |
| 1581 I08 | X | 1346 | 1360 | 0.74857184  | 789    | 800    | -0.11401443 | 3123042 | -0.00138711 | 3019900   | -0.15293184 | experimental | ChemBridge | 5429985 |
| 1581 I09 | X | 1107 | 1120 | 0.02268385  | 911    | 920    | 0.3833169   | 2255215 | -1.63418865 | 2501479   | -1.13104634 | experimental | ChemBridge | 5426004 |
| 1581 I10 | X | 1107 | 1120 | 0.02268385  | 751    | 760    | -0.26892091 | 3896359 | 1.4535955   | 3958875   | 1.61864968  | experimental | ChemBridge | 5430586 |
| 1581 I11 | X | 969  | 980  | -0.79191889 | 750    | 760    | -0.27520974 | 2988576 | 0.25438257  | 3254826   | 0.23249814  | experimental | ChemBridge | 5427373 |
| 1581 I12 | X | 987  | 1000 | -0.34177874 | 710    | 720    | -0.43605685 | 2864697 | -0.48754587 | 302515542 | 0.2515542   | experimental | ChemBridge | 5433447 |
| 1581 I13 | X | 1068 | 1080 | -0.09576649 | 711    | 720    | -0.43198036 | 2943746 | -0.33872944 | 2983656   | -0.22131406 | experimental | ChemBridge | 5427733 |
| 1581 I14 | X | 1027 | 1040 | -0.22029121 | 990    | 1000   | 0.70535932  | 3789616 | 1.25276039  | 3154331   | 0.10070162  | experimental | ChemBridge | 5431976 |
| 1581 I15 | X | 1108 | 1120 | 0.02572104  | 831    | 840    | 0.05719799  | 3453107 | 0.6196245   | 3646312   | 1.02893128  | experimental | ChemBridge | 5428340 |
| 1581 I16 | X | 1067 | 1080 | -0.09880368 | 591    | 600    | -0.92115872 | 3717644 | 1.11734631  | 3695323   | 1.12140124  | experimental | ChemBridge | 5452219 |
| 1581 I17 | X | 1427 | 1440 | 0.99458409  | 632    | 640    | -0.75402278 | 3064503 | -0.11512723 | 2927051   | -0.32811176 | experimental | ChemBridge | 5429292 |
| 1581 I18 | X | 1505 | 1520 | 2.12148477  | 750    | 760    | -0.27520974 | 2636161 | -0.91744532 | 3147454   | -0.62749815 | experimental | ChemBridge | 5454028 |
| 1581 I19 | X | 1067 | 1080 | 0.26565891  | 631    | 640    | -0.75809926 | 3118128 | -0.02486801 | 3064373   | 0.06902338  | experimental | ChemBridge | 5404210 |
| 1581 I20 | X | 1105 | 1120 | 0.01660947  | 590    | 600    | -0.9252352  | 3149045 | 0.04753709  | 3128939   | 0.05279406  | experimental | ChemBridge | 5418134 |
| 1581 I21 | X | 1265 | 1280 | 0.50255959  | 907    | 920    | 0.36701095  | 3616170 | 0.92642473  | 3076707   | -0.04575302 | experimental | ChemBridge | 5404831 |
| 1581 I22 | X | 1067 | 1080 | -0.09880368 | 1109   | 1120   | 1.19046119  | 1874728 | -2.35006838 | 1703378   | -2.63683827 | experimental | ChemBridge | 5420319 |
| 1581 I23 | N | 1027 | 1040 | -0.22029121 | 786    | 800    | -0.12624389 | 3165940 | 0.07932474  | 3135607   | 0.0653747   | empty        |            |         |
| 1581 I24 | P | 1271 | 1280 | 0.52078272  | 1026   | 1440   | 0.85211282  | 2808126 | -0.59389613 | 3075329   | -0.04835292 | empty        |            |         |
| 1581 J01 | X | 1545 | 1560 | 1.3529723   | 949    | 960    | 0.53822338  | 2116830 | -1.89455764 | 2462770   | -1.20407933 | experimental | ChemBridge | 5420837 |
| 1581 J02 | X | 1144 | 1160 | 0.13505981  | 830    | 840    | 0.05312151  | 3095418 | -0.05361119 | 3066213   | -0.06555224 | experimental | ChemBridge | 5467706 |
| 1581 J03 | X | 1263 | 1280 | 0.49648521  | 828    | 840    | 0.04496854  | 3430618 | 0.57731184  | 3501533   | 0.75577406  | experimental | ChemBridge | 5421287 |
| 1581 J04 | X | 1386 | 1400 | 0.87005937  | 950    | 960    | 0.54229986  | 3437829 | 0.59087921  | 3402116   | 0.56820217  | experimental | ChemBridge | 5490920 |
| 1581 J05 | X | 1022 | 1040 | -0.23547715 | 791    | 800    | -0.10586146 | 3328570 | 0.38531028  | 3137558   | 0.06905569  | experimental | ChemBridge | 5421744 |
| 1581 J06 | X | 1107 | 1120 | 0.02268385  | 791    | 800    | -0.10586146 | 3590761 | 0.87861813  | 3817038   | 1.35104319  | experimental | ChemBridge | 5493421 |
| 1581 J07 | X | 987  | 1000 | -0.34177874 | 870    | 880    | 0.21618096  | 3742218 | 1.16358187  | 4111996   | 1.90754591  | experimental | ChemBridge | 5422614 |
| 1581 J08 | X | 908  | 920  | -0.58171661 | 949    | 960    | 0.53822338  | 4359816 | 2.32558186  | 4151485   | 1.98205054  | experimental | ChemBridge | 5510398 |
| 1581 J09 | X | 867  | 880  | -0.70624133 | 911    | 920    | 0.3833169   | 3424569 | 0.56593075  | 3371596   | 0.51061952  | experimental | ChemBridge | 5423756 |
| 1581 J10 | X | 1147 | 1160 | 0.14417138  | 710    | 720    | -0.43605685 | 3484758 | 0.67917531  | 3743513   | 1.21338221  | experimental | ChemBridge | 5511264 |
| 1581 J11 | X | 946  | 960  | -0.46630346 | 631    | 640    | -0.75809926 | 3461489 | 0.63539509  | 3619270   | 0.97791064  | experimental | ChemBridge | 5424603 |
| 1581 J12 | X | 1308 | 1320 | 0.63315868  | 1192   | 1200   | 1.52880955  | 3645270 | 0.98117588  | 3325933   | 0.42446629  | experimental | ChemBridge | 5511543 |
| 1581 J13 | X | 947  | 960  | -0.46326627 | 589    | 600    | -0.92931169 | 3827675 | 1.32436774  | 3581889   | 0.90738322  | experimental | ChemBridge | 5425461 |
| 1581 J14 | X | 1108 | 1120 | 0.02572104  | 990    | 1000   | 0.70535932  | 3718268 | 1.11852035  | 3902674   | 1.51261422  | experimental | ChemBridge | 5353502 |
| 1581 J15 | X | 1068 | 1080 | -0.09576649 | 749    | 760    | -0.27707388 | 3497031 | 0.70226675  | 3483042   | 0.72088675  | experimental | ChemBridge | 5461629 |
| 1581 J16 | X | 1048 | 1060 | -0.21725402 | 833    | 840    | 0.06535097  | 3227738 | 0.19159661  | 3696224   | 0.744552    | experimental | ChemBridge | 5354028 |
| 1581 J17 | X | 986  | 1000 | -0.34841593 | 550    | 560    | -0.08829465 | 3913767 | 0.8654327   | 3344852   | 0.46016132  | experimental | ChemBridge | 5463417 |
| 1581 J18 | X | 1586 | 1600 | 1.47749702  | 1272   | 1280   | 1.85492845  | 3088508 | -0.06636223 | 3461551   | 0.68033928  | experimental | ChemBridge | 5354349 |
| 1581 J19 | X | 1065 | 1080 | -0.10487806 | 709    | 720    | -0.44013333 | 3272788 | 0.28035741  | 3298711   | 0.37310604  | experimental | ChemBridge | 5465506 |
| 1581 J20 | X | 1346 | 1360 | 0.74857184  | 909    | 920    | 0.37516393  | 2772761 | -0.66043477 | 2595356   | -0.95392686 | experimental | ChemBridge | 5355113 |
| 1581 J21 | X | 1067 | 1080 | 0.86702218  | 1468   | 1480   | 2.65391977  | 3058540 | -0.12274651 | 2858216   | -0.45798403 | experimental | ChemBridge | 5466647 |
| 1581 J22 | X | 1227 | 1240 | 0.38714644  | 1      |        |             |         |             |           |             |              |            |         |

|          |   |      |      |             |        |        |             |         |             |         |             |              |            |         |
|----------|---|------|------|-------------|--------|--------|-------------|---------|-------------|---------|-------------|--------------|------------|---------|
| 1581 K13 | X | 1068 | 1080 | -0.09576649 | 751    | 760    | -0.26892091 | 3421547 | 0.56024491  | 3491856 | 0.73751629  | experimental | ChemBridge | 5427748 |
| 1581 K14 | X | 988  | 1000 | -0.33874155 | 1030   | 1040   | 0.86841877  | 3857467 | 1.38042087  | 3585936 | 0.91501877  | experimental | ChemBridge | 5432005 |
| 1581 K15 | X | 948  | 960  | -0.46022908 | 990    | 1000   | 0.70535932  | 3266297 | 0.26814471  | 3628482 | 0.99529109  | experimental | ChemBridge | 5428361 |
| 1581 K16 | X | 1048 | 1040 | -0.21725402 | 630    | 640    | -0.76217575 | 4131107 | 1.89765982  | 4242598 | 2.15139512  | experimental | ChemBridge | 5452308 |
| 1581 K17 | X | 908  | 920  | -0.58171661 | 792    | 800    | -0.10172657 | 4253669 | 1.12568811  | 3772472 | 1.72696724  | experimental | ChemBridge | 5429302 |
| 1581 K18 | X | 1147 | 1160 | 0.14417138  | 629    | 640    | -0.76625224 | 3602882 | 0.90142358  | 3494272 | 0.7420746   | experimental | ChemBridge | 5415575 |
| 1581 K19 | X | 987  | 1000 | -0.34177874 | 871    | 880    | 0.22025745  | 3369939 | 0.46314534  | 3744530 | 1.214241    | experimental | ChemBridge | 5404356 |
| 1581 K20 | X | 1266 | 1280 | 0.50559678  | 829    | 840    | 0.04904502  | 4087340 | 1.81292296  | 3916480 | 1.53866225  | experimental | ChemBridge | 5418585 |
| 1581 K21 | X | 1226 | 1240 | 0.38410925  | 1029   | 1040   | 0.86434228  | 3871649 | 1.40710406  | 3624739 | 0.9882291   | experimental | ChemBridge | 5404845 |
| 1581 K22 | X | 1026 | 1040 | -0.2233284  | 709    | 720    | -0.44013333 | 3561668 | 0.82388015  | 3008765 | -0.17394045 | experimental | ChemBridge | 5420394 |
| 1581 K23 | N | 1107 | 1120 | 0.02268385  | 670    | 680    | -0.5991163  | 3382714 | 0.48718129  | 2922769 | -0.33619069 | empty        |            |         |
| 1581 K24 | P | 1190 | 1200 | 0.27477047  | 992    | 1000   | 0.71351229  | 3583079 | 0.86416458  | 4151733 | 1.98251844  | experimental |            |         |
| 1581 L01 | X | 1507 | 1520 | 1.23755915  | 670    | 680    | -0.5991163  | 2893773 | -0.43275278 | 2967060 | -0.25262604 | experimental | ChemBridge | 5420840 |
| 1581 L02 | X | 1299 | 1320 | 0.60582399  | 826    | 840    | 0.03681556  | 3027231 | -0.18165385 | 3060506 | -0.07631975 | experimental | ChemBridge | 5467830 |
| 1581 L03 | X | 1061 | 1080 | -0.11702681 | 867    | 880    | 0.2039515   | 3467773 | 0.64721833  | 3573456 | 0.89147252  | experimental | ChemBridge | 5421293 |
| 1581 L04 | X | 1866 | 1880 | 2.32790973  | 1191   | 1200   | 1.52473306  | 2698475 | -0.8002026  | 3164064 | 0.11906505  | experimental | ChemBridge | 5491180 |
| 1581 L05 | X | 944  | 960  | -0.47237784 | 828    | 840    | 0.04496854  | 3046682 | -0.14505713 | 3314587 | 0.40305958  | experimental | ChemBridge | 5421949 |
| 1581 L06 | X | 908  | 920  | -0.58171661 | 771    | 780    | 0.22025745  | 3248303 | 0.23428931  | 3615507 | 0.97081092  | experimental | ChemBridge | 5509643 |
| 1581 L07 | X | 988  | 1000 | -0.33874155 | 830    | 840    | 0.05312151  | 3777422 | 1.22391759  | 4151733 | 1.98251844  | experimental | ChemBridge | 5422924 |
| 1581 L08 | X | 829  | 840  | -0.82165448 | 830    | 840    | 0.05312151  | 3599135 | 0.89437367  | 3588394 | 0.91965632  | experimental | ChemBridge | 5510982 |
| 1581 L09 | X | 868  | 880  | -0.70320414 | 751    | 760    | -0.26892091 | 3694931 | 1.07461129  | 3728442 | 1.18388748  | experimental | ChemBridge | 5423282 |
| 1581 L10 | X | 1067 | 1080 | -0.09880368 | 750    | 760    | -0.2729974  | 3698163 | 1.08069314  | 3496691 | 0.74714799  | experimental | ChemBridge | 5511358 |
| 1581 L11 | X | 947  | 960  | -0.46326627 | 792    | 800    | -0.10178497 | 3949038 | 1.55271013  | 3638160 | 1.01355075  | experimental | ChemBridge | 5424817 |
| 1581 L12 | X | 1067 | 1080 | -0.09880368 | 630    | 640    | -0.76217575 | 3419002 | 0.55545653  | 3673319 | 1.07988589  | experimental | ChemBridge | 5512386 |
| 1581 L13 | X | 948  | 960  | -0.46022908 | 790    | 800    | -0.10995394 | 2930148 | -0.36431384 | 3821287 | 1.35905986  | experimental | ChemBridge | 5425204 |
| 1581 L14 | X | 988  | 1000 | -0.33874155 | 830    | 840    | 0.05312151  | 3777422 | -1.30821235 | 3727476 | 5.1227983   | experimental | ChemBridge | 5353576 |
| 1581 L15 | X | 1107 | 1120 | 0.02268385  | 950    | 960    | 0.54229986  | 3904058 | -0.46801105 | 3352123 | 0.77778591  | experimental | ChemBridge | 5467651 |
| 1581 L16 | X | 1267 | 1280 | 0.50863397  | 950    | 960    | 0.54229986  | 3373591 | 0.47001652  | 3646133 | 1.02859356  | experimental | ChemBridge | 5354034 |
| 1581 L17 | X | 1067 | 1080 | -0.09880368 | 830    | 840    | 0.05312151  | 3696234 | 1.07706376  | 4050339 | 1.80008408  | experimental | ChemBridge | 5463541 |
| 1581 L18 | X | 1027 | 1040 | -0.22029121 | 871    | 880    | 0.22025745  | 3518785 | 0.74319653  | 3167258 | 0.12509123  | experimental | ChemBridge | 5354514 |
| 1581 L19 | X | 945  | 960  | -0.46934065 | 789    | 800    | -0.11401443 | 3827667 | 1.32435269  | 4168480 | 2.01411532  | experimental | ChemBridge | 5465567 |
| 1581 L20 | X | 1348 | 1360 | 0.75464621  | 831    | 840    | 0.05719799  | 3324194 | 0.37707692  | 3384646 | 0.5352412   | experimental | ChemBridge | 5355121 |
| 1581 L21 | X | 1106 | 1120 | 0.01964666  | 749    | 760    | -0.2707388  | 3253312 | 0.24371365  | 3222586 | 0.22947959  | experimental | ChemBridge | 5466664 |
| 1581 L22 | X | 1267 | 1280 | 0.50863397  | 951    | 960    | 0.54229986  | 3307013 | 0.33207012  | 4194337 | 1.90859808  | experimental | ChemBridge | 5355919 |
| 1581 L23 | N | 1025 | 1040 | -0.22636559 | 706    | 720    | -0.45236279 | 3197820 | 0.13930641  | 2917461 | -0.3462054  | empty        |            |         |
| 1581 L24 | P | 1307 | 1320 | 0.6301215   | 988    | 1480   | 0.69720634  | 2797867 | -0.61319826 | 2821196 | -0.52783035 | empty        |            |         |
| 1581 M01 | X | 1503 | 1520 | 1.22541039  | 989    | 1000   | 0.70128283  | 2693712 | -0.8091641  | 2467198 | -1.19572494 | experimental | ChemBridge | 5339894 |
| 1581 M02 | X | 2824 | 2840 | 5.23753606  | 2509   | 2520   | 6.897542    | 2386295 | -1.38756389 | 2645778 | -0.85879474 | experimental | ChemBridge | 5406375 |
| 1581 M03 | X | 1101 | 1120 | 0.00446072  | 866    | 880    | 0.19987501  | 2887885 | -0.44383095 | 3102295 | 0.00252434  | experimental | ChemBridge | 5322588 |
| 1581 M04 | X | 1263 | 1280 | 0.49648521  | 628    | 640    | -0.77032872 | 3131764 | 0.10502319  | 2922386 | -0.33691331 | experimental | ChemBridge | 5410648 |
| 1581 M05 | X | 1560 | 1560 | 0.00000000  | 1311   | 1320   | 1.35904668  | 3013914 | 1.71164149  | 2745598 | -0.85862412 | experimental | ChemBridge | 5421358 |
| 1581 M06 | X | 1024 | 1040 | -0.22940278 | 708    | 720    | -0.44420982 | 2431468 | -1.30257167 | 2352054 | -1.41296699 | experimental | ChemBridge | 5412294 |
| 1581 M07 | X | 1186 | 1200 | 0.26262172  | 792    | 800    | -0.10178497 | 3043958 | -0.15018229 | 3681004 | 1.09438532  | experimental | ChemBridge | 5325594 |
| 1581 M08 | X | 1147 | 1160 | 0.14417138  | 671    | 680    | -0.59503981 | 3435865 | 0.58718398  | 2983244 | -0.22209139 | experimental | ChemBridge | 5430280 |
| 1581 M09 | X | 1068 | 1080 | -0.09576649 | 792    | 800    | -0.10178497 | 3289517 | 0.31183274  | 2996776 | -0.19656032 | experimental | ChemBridge | 5426222 |
| 1581 M10 | X | 1027 | 1040 | -0.22029121 | 630    | 640    | -0.76217575 | 2784486 | -0.63837329 | 2948533 | -0.28758128 | experimental | ChemBridge | 5430741 |
| 1581 M11 | X | 987  | 1000 | -0.34177874 | 751    | 760    | -0.26892091 | 3217982 | 0.13774087  | 2863820 | -0.44741086 | experimental | ChemBridge | 5427358 |
| 1581 M12 | X | 1249 | 1240 | -0.39018363 | 1111   | 1120   | 1.19861416  | 2776510 | -0.95330105 | 3374447 | -0.36053104 | experimental | ChemBridge | 5411421 |
| 1581 M13 | X | 908  | 920  | -0.58171661 | 710    | 720    | -0.47611416 | 2739411 | -0.35247112 | 3354181 | 0.00778659  | experimental | ChemBridge | 5427651 |
| 1581 M14 | X | 1104 | 1120 | 0.01357228  | 706    | 720    | -0.45236279 | 2797259 | -0.61434221 | 2885984 | -0.40559363 | experimental | ChemBridge | 5432098 |
| 1581 M15 | X | 1266 | 1280 | 0.50559678  | 588    | 600    | -0.93338818 | 3325270 | 0.37910139  | 3218766 | 0.22227233  | experimental | ChemBridge | 5428821 |
| 1581 M16 | X | 1345 | 1360 | 0.74553465  | 910    | 920    | 0.37924041  | 2886583 | -0.44628064 | 2512054 | -1.11109429 | experimental | ChemBridge | 5425446 |
| 1581 M17 | X | 1106 | 1120 | 0.01964666  | 950    | 960    | 0.54229986  | 3370221 | 0.46367592  | 3271420 | 0.32161556  | experimental | ChemBridge | 5429416 |
| 1581 M18 | X | 1305 | 1320 | 0.62404712  | 869    | 880    | 0.21210447  | 3717975 | 1.11796908  | 3078893 | -0.04162865 | experimental | ChemBridge | 5415800 |
| 1581 M19 | X | 1868 | 1880 | 2.3339841   | 1351   | 1360   | 2.17697087  | 2819446 | -0.57259775 | 2374440 | -1.37073317 | experimental | ChemBridge | 5404557 |
| 1581 M20 | X | 864  | 880  | -0.7153529  | 589    | 600    | -0.92931169 | 1185354 | -3.64711369 | 1194537 | -3.59687801 | experimental | ChemBridge | 5419273 |
| 1581 M21 | X | 1106 | 1120 | 0.01964666  | 831    | 840    | 0.05719799  | 3195956 | 0.13579933  | 2948270 | -0.28807748 | experimental | ChemBridge | 5404935 |
| 1581 M22 | X | 1426 | 1440 | 0.9915469   | 867    | 880    | 0.2039515   | 1649581 | -2.77367858 | 1516497 | -2.98843012 | experimental | ChemBridge | 5420480 |
| 1581 M23 | N | 1421 | 1440 | 0.97636096  | 1303   | 1800   | 1.98129953  | 3364448 | 0.45281412  | 2824616 | -0.52137778 | empty        |            |         |
| 1581 M24 | P | 1849 | 2280 | 2.27627752  | 167771 | 168240 | 680.58582   | 2964190 | -0.30026441 | 2805856 | -0.55677262 | empty        |            |         |
| 1581 N01 | X | 1428 | 1440 | 0.99762127  | 711    | 720    | -0.43198036 | 2113849 | -1.90016634 | 2120706 | -1.84945781 | experimental | ChemBridge | 5420861 |
| 1581 N02 | X | 1418 | 1440 | 0.96724939  | 904    | 920    | 0.35478149  | 3165464 | 0.07842916  | 3042021 | -0.11119574 | experimental | ChemBridge | 5467870 |
| 1581 N03 | X | 1502 | 1520 | 1.2223732   | 866    | 880    | 0.19987501  | 3085983 | -0.06923149 | 2873853 | -0.42848142 | experimental | ChemBridge | 5421358 |
| 1581 N04 | X | 1145 | 1160 | 0.138097    | 871    | 880    | 0.22025745  | 2944111 | -0.3380427  | 2922178 | -0.33730574 | experimental | ChemBridge | 5491227 |
| 1581 N05 | X | 1220 | 1240 | 0.36588612  | 787    | 800    | -0.1221674  | 3049693 | -0.13939199 | 2891767 | -0.39468274 | experimental | ChemBridge | 5422032 |
| 1581 N06 | X | 1905 | 1920 | 2.44636007  | 1272   | 1280   | 1.85492845  | 3277128 | 0.28852305  | 3510429 | 0.72755831  | experimental | ChemBridge | 5509739 |
| 1581 N07 | X | 1664 | 1680 | 1.7143977   | 670    | 680    | -0.5991163  | 2804659 | -0.60041923 | 2919907 | -0.34159048 | experimental | ChemBridge | 5423129 |
| 1581 N08 | X | 1265 | 1280 | 0.50529599  | 671    | 680    | -0.59503981 | 3208469 | 0.15934232  | 2858736 | -0.45700294 | experimental | ChemBridge | 5511097 |
| 1581 N09 | X | 986  | 1000 | -0.34481593 | 830    | 840    | 0.05312151  | 3054112 | -0.13107771 | 2985054 | -0.21867643 | experimental | ChemBridge | 5423875 |
| 1581 N10 | X | 1308 | 1320 | 0.63018363  | 991    | 1000   | 0.74961358  | 3227439 | 0.19503105  | 3104887 | -0.10601481 | experimental | ChemBridge | 5411362 |
| 1581 N11 | X | 1106 | 1120 | 0.01964666  | 710    | 720    | -0.43605685 | 2897508 | -0.42572547 | 3104887 | 0.00738264  | experimental | ChemBridge | 5424902 |
| 1581 N12 | X | 1147 | 1160 | 0.14417138  | 711    | 720    | -0.43198036 | 3173645 | 0.09382157  | 3291732 | 0.35993863  | experimental | ChemBridge | 5512436 |
| 1581 N13 | X | 904  | 920  | -0.59386537 | 627    | 640    | -0.77440521 | 2629053 | -0.9308189  | 2903000 | -0.37348923 | experimental | ChemBridge | 5425527 |
| 1581 N14 | X | 2187 | 2200 | 3.30284715  | 2149   | 2160   | 5.43000693  | 3081187 | -0.08013657 | 3126394 | 0.04799236  | experimental | ChemBridge | 5353712 |
| 1581 N15 | X | 1383 | 1400 | 0.8609478   | 1467   | 1480   | 2.64984328  | 2881157 | -0.45648957 | 2789576 | -0.58748839 | experimental | ChemBridge | 5461960 |
| 1581 N16 | X | 1345 | 1360 | 0.74553465  | 949    | 960    |             |         |             |         |             |              |            |         |

|          |   |      |            |             |        |            |             |             |             |             |             |              |            |         |
|----------|---|------|------------|-------------|--------|------------|-------------|-------------|-------------|-------------|-------------|--------------|------------|---------|
| 1581 007 | X | 1224 | 1240       | 0.37803487  | 751    | 760        | -0.26892091 | 3496494     | 0.7012564   | 3336417     | 0.44424665  | experimental | ChemBridge | 5325628 |
| 1581 008 | X | 1346 | 1360       | 0.74857184  | 1031   | 1040       | 0.87249525  | 3164648     | 0.07689387  | 3022219     | -0.14855654 | experimental | ChemBridge | 5430292 |
| 1581 009 | X | 1147 | 1160       | 0.14417138  | 831    | 840        | 0.05719799  | 2851345     | -0.51258033 | 2858186     | -0.45804064 | experimental | ChemBridge | 5426433 |
| 1581 010 | X | 1084 | 1080       | -0.10791525 | 789    | 800        | -0.11401443 | 2730528     | -0.73089541 | 2739855     | -0.68299408 | experimental | ChemBridge | 5430747 |
| 1581 011 | X | 1267 | 1280       | 0.50863897  | 831    | 840        | 0.05719799  | 2277305     | -0.65363883 | 2873975     | -0.42825124 | experimental | ChemBridge | 5427383 |
| 1581 012 | X | 1027 | 1040       | -0.22029121 | 712    | 720        | -0.42790387 | 2327388     | -1.4983964  | 2418593     | -1.28742889 | experimental | ChemBridge | 5431481 |
| 1581 013 | X | 1108 | 1120       | 0.02572104  | 631    | 640        | -0.75809926 | 1906146     | -2.29095956 | 1961051     | -2.15068185 | experimental | ChemBridge | 5427902 |
| 1581 014 | X | 1144 | 1160       | 0.13505981  | 866    | 880        | 0.19987501  | 3073594     | -0.09442267 | 2932547     | -0.31774236 | experimental | ChemBridge | 5432156 |
| 1581 015 | X | 1185 | 1200       | 0.25958453  | 869    | 880        | 0.21210447  | 2967853     | -0.29337254 | 3155369     | 0.10266003  | experimental | ChemBridge | 5428832 |
| 1581 016 | X | 1345 | 1360       | 0.74553465  | 770    | 680        | -0.5991163  | 3339225     | 0.40535748  | 2775860     | -0.61336662 | experimental | ChemBridge | 5452643 |
| 1581 017 | X | 1306 | 1320       | 0.62708431  | 651    | 760        | -0.26892091 | 3015179     | -0.20432948 | 2821009     | -0.52818317 | experimental | ChemBridge | 5429505 |
| 1581 018 | X | 1306 | 1320       | 0.62708431  | 790    | 800        | -0.10993794 | 3480475     | 0.67111692  | 3044459     | -0.10714307 | experimental | ChemBridge | 5416101 |
| 1581 019 | X | 1187 | 1200       | 0.26565891  | 1070   | 1080       | 0.10314782  | 3311259     | 0.35273994  | 2983436     | -0.22172914 | experimental | ChemBridge | 5404583 |
| 1581 020 | X | 1067 | 1080       | -0.09880368 | 869    | 880        | 0.21210447  | 3013765     | -0.2069899  | 2890449     | -0.39716944 | experimental | ChemBridge | 5419144 |
| 1581 021 | X | 866  | 880        | -0.70927852 | 570    | 760        | -0.2729974  | 1167675     | -3.68037642 | 1073596     | -3.82505964 | experimental | ChemBridge | 5404961 |
| 1581 022 | X | 1068 | 1080       | -0.09576649 | 828    | 840        | 0.04496854  | 3086706     | -0.06975266 | 3208217     | 0.20236933  | experimental | ChemBridge | 5420769 |
| 1581 023 | N | 1181 | 1200       | 0.24743578  | 1114   | 1600       | 1.21084362  | 2744932     | -0.71279456 | 2576100     | -0.98948396 | empty        |            |         |
| 1581 024 | P | 1809 | 2240       | 2.15479     | 163450 | 163920     | 662.971323  | 2947046     | -0.33252055 | 2491630     | -1.14962863 | empty        |            |         |
| 1581 P01 | X | 1071 | 1080       | -0.08665493 | 1074   | 1080       | 1.04778416  | 1963955     | -2.18218932 | 1811575     | -2.43270099 | experimental | ChemBridge | 5420876 |
| 1581 P02 | X | 1747 | 1760       | 1.96648432  | 1030   | 1040       | 0.86841877  | 2516330     | -1.14290258 | 2642640     | -0.86471527 | experimental | ChemBridge | 5467883 |
| 1581 P03 | X | 1303 | 1320       | 0.61797274  | 948    | 960        | 0.53414689  | 2434572     | -1.29673155 | 2737044     | -0.68660149 | experimental | ChemBridge | 5421384 |
| 1581 P04 | X | 1389 | 1400       | 0.87917093  | 912    | 920        | 0.38739338  | 2053101     | -2.01446266 | 2079508     | -1.92718684 | experimental | ChemBridge | 5491247 |
| 1581 P05 | X | 1062 | 1080       | -0.11398962 | 711    | 720        | -0.43198036 | 2062553     | -1.99667888 | 1909862     | -2.24726109 | experimental | ChemBridge | 5422033 |
| 1581 P06 | X | 2670 | 2680       | 4.76980907  | 1114   | 1120       | 1.21084362  | 2379481     | -1.40038431 | 2371394     | -1.37648012 | experimental | ChemBridge | 5510868 |
| 1581 P07 | X | 1185 | 1200       | 0.25958453  | 712    | 720        | -0.42790387 | 2753742     | -0.69621869 | 2852974     | -0.46787421 | experimental | ChemBridge | 5432310 |
| 1581 P08 | X | 1149 | 1160       | 0.15024599  | 753    | 760        | -0.26707843 | 2556952     | -1.06647569 | 2803725     | -3.56670321 | experimental | ChemBridge | 5411098 |
| 1581 P09 | X | 1109 | 1120       | 0.02875822  | 592    | 600        | -0.91708223 | 2246692     | -1.31532002 | 1142341     | -1.16989489 | experimental | ChemBridge | 5423883 |
| 1581 P10 | X | 1590 | 1600       | 1.48964577  | 1193   | 1200       | 1.53288603  | 2231051     | -1.6796528  | 2281148     | -1.54674892 | experimental | ChemBridge | 5511452 |
| 1581 P11 | X | 1309 | 1320       | 0.63619587  | 912    | 920        | 0.38739338  | 2534161     | -1.10935656 | 2576647     | -0.98922548 | experimental | ChemBridge | 5425008 |
| 1581 P12 | X | 1030 | 1040       | -0.21117965 | 592    | 600        | -0.91708223 | 2714378     | -0.77028138 | 2471631     | -1.18736111 | experimental | ChemBridge | 5512451 |
| 1581 P13 | X | 1151 | 1160       | 0.15632013  | 1034   | 1040       | 0.88472471  | 2798835     | -0.61137699 | 2379217     | -1.36172032 | experimental | ChemBridge | 5425594 |
| 1581 P14 | X | 1110 | 1120       | 0.03179541  | 992    | 1000       | 0.71351229  | 2688633     | -0.81872015 | 2891600     | -0.39499782 | experimental | ChemBridge | 5353888 |
| 1581 P15 | X | 1269 | 1280       | 0.51470834  | 752    | 760        | -0.26484442 | 2760463     | -0.68357325 | 2482088     | -1.1676317  | experimental | ChemBridge | 5462282 |
| 1581 P16 | N | 1409 | 1480       | 0.87917093  | 953    | 960        | 0.59459997  | 3260756     | -1.10878835 | 2376890     | -1.28363029 | empty        |            |         |
| 1581 P17 | X | 1109 | 1120       | 0.02875822  | 832    | 840        | 0.06127448  | 2473445     | -1.22359267 | 2673768     | -0.80598549 | experimental | ChemBridge | 5464752 |
| 1581 P18 | X | 1190 | 1200       | 0.27477047  | 953    | 960        | 0.55452932  | 2797960     | -0.61302329 | 2641958     | -0.86600201 | experimental | ChemBridge | 5354654 |
| 1581 P19 | X | 990  | 1000       | -0.33266718 | 871    | 880        | 0.22025745  | 2698478     | -0.80019696 | 2776270     | -0.61259307 | experimental | ChemBridge | 5465854 |
| 1581 P20 | X | 1150 | 1160       | 0.15328294  | 912    | 1200       | 1.52880955  | 2784569     | -0.63821822 | 2642982     | -0.86407001 | experimental | ChemBridge | 5355315 |
| 1581 P21 | X | 1271 | 1280       | 0.52078272  | 1192   | 920        | 0.38739338  | 3022735     | -0.1901113  | 2625394     | -0.89725361 | experimental | ChemBridge | 5466739 |
| 1581 P22 | X | 1109 | 1120       | 0.02875822  | 832    | 840        | 0.06127448  | 2686784     | -1.04421398 | 2338393     | -1.43874371 | experimental | ChemBridge | 5366324 |
| 1581 P23 | N | 1067 | 1120       | 1.22145989  | 1027   | 1030       | 1.12214599  | 2534463     | -1.10878835 | 2461023     | -1.28363029 | empty        |            |         |
| 1581 P24 | P | 1549 | 1560       | 3.65121005  | 1442   | 1920       | 2.54793112  | 2360756     | -1.43561508 | 2085500     | -0.91588162 | empty        |            |         |
| 1582 A01 | X | 1916 | 1920       | 2.81323968  | 1156   | 1160       | 1.46484243  | 2726651     | -0.9916281  | 1793991     | -2.32010836 | experimental | ChemBridge | 5528697 |
| 1582 A02 | X | 710  | 720        | -0.41465706 | 673    | 680        | -0.18893074 | 1464743     | -3.31896945 | 1623703     | -2.68128023 | experimental | ChemBridge | 5403253 |
| 1582 A03 | X | 752  | 760        | -0.30224275 | 514    | 520        | -0.73334055 | 2340310     | -1.70415816 | 2089633     | -1.69306725 | experimental | ChemBridge | 5531789 |
| 1582 A04 | X | 1390 | 1400       | 2.2194458   | 793    | 800        | 0.22194458  | 1927870     | -2.4648227  | 1808551     | -2.28922737 | experimental | ChemBridge | 5683077 |
| 1582 A05 | X | 1990 | 2000       | 3.01130299  | 1392   | 1400       | 2.27289723  | 2274566     | -1.82541005 | 1736486     | -2.44207343 | experimental | ChemBridge | 5535419 |
| 1582 A06 | X | 1600 | 1.93801394 | 1313        | 1320   | 2.00246139 | 3033230     | -0.42620338 | 2455603     | -1.00170206 | 2167066     | experimental | ChemBridge | 5686075 |
| 1582 A07 | X | 832  | 840        | -0.08812024 | 532    | 560        | -0.60329003 | 3151916     | -0.20731037 | 2675555     | -0.31570619 | experimental | ChemBridge | 5375404 |
| 1582 A08 | X | 594  | 600        | -0.72513469 | 636    | 640        | -0.3156173  | 2721152     | -1.00176992 | 2758565     | -0.27429773 | experimental | ChemBridge | 5688908 |
| 1582 A09 | X | 635  | 640        | -0.61539691 | 435    | 440        | -1.00383347 | 2994039     | -0.49848347 | 2714990     | -1.51202956 | experimental | ChemBridge | 5539066 |
| 1582 A10 | X | 715  | 720        | -0.40124744 | 514    | 520        | -0.73334055 | 2284111     | -1.80780617 | 2299254     | -1.24847216 | experimental | ChemBridge | 5512466 |
| 1582 A11 | X | 795  | 800        | -0.1871519  | 1276   | 1280       | 1.87571775  | 2122316     | -2.10620526 | 2023324     | -1.83370515 | experimental | ChemBridge | 5691482 |
| 1582 A12 | X | 354  | 360        | -1.3675022  | 473    | 480        | -0.87372295 | 2533026     | -1.34873137 | 2500991     | -0.82059861 | experimental | ChemBridge | 5513865 |
| 1582 A13 | X | 636  | 640        | -0.61272038 | 596    | 600        | -0.45257254 | 3133859     | -0.24061296 | 1866286     | -2.16677447 | experimental | ChemBridge | 5693826 |
| 1582 A14 | X | 474  | 480        | -1.04631844 | 555    | 560        | -0.59295814 | 2665619     | -1.10418963 | 2536299     | -0.74571122 | experimental | ChemBridge | 5523004 |
| 1582 A15 | X | 554  | 560        | -0.83219594 | 555    | 560        | -0.59295814 | 2875459     | -0.71718098 | 2414194     | -1.00469047 | experimental | ChemBridge | 5705215 |
| 1582 A16 | X | 874  | 880        | 0.02429407  | 555    | 560        | -0.59295814 | 2775381     | -0.90175519 | 2775052     | -0.23932967 | experimental | ChemBridge | 5524802 |
| 1582 A17 | X | 792  | 800        | -0.19518149 | 591    | 560        | -0.60665399 | 3106152     | -0.29171308 | 2443232     | -0.94310241 | experimental | ChemBridge | 5705556 |
| 1582 A18 | X | 593  | 600        | -0.72781122 | 595    | 600        | -0.4559997  | 3180957     | -0.15374995 | 2775292     | -0.23882064 | experimental | ChemBridge | 5526224 |
| 1582 A19 | X | 953  | 960        | 0.23574004  | 713    | 720        | -0.0519723  | 2410989     | -1.57380463 | 1885994     | -2.12497484 | experimental | ChemBridge | 5713146 |
| 1582 A20 | X | 1272 | 1280       | 1.08955353  | 1034   | 1040       | 1.04711918  | 2629049     | -1.17163581 | 2112818     | -1.64389309 | experimental | ChemBridge | 5367662 |
| 1582 A21 | X | 1351 | 1360       | 1.3009995   | 951    | 960        | 0.76293042  | 2824300     | -0.81153371 | 2107128     | -1.65596128 | experimental | ChemBridge | 5402708 |
| 1582 A22 | X | 911  | 920        | 0.12332573  | 1033   | 1040       | 1.04369522  | 3079058     | -0.34168263 | 2424258     | -0.98334526 | experimental | ChemBridge | 5373477 |
| 1582 A23 | N | 1067 | 1080       | 0.54086461  | 712    | 720        | -0.05539627 | 2554790     | -1.30859194 | 2151579     | -1.56168305 | empty        |            |         |
| 1582 A24 | P | 1243 | 1760       | 1.01193412  | 994    | 1000       | 0.91016074  | 2053449     | -2.23321691 | 1817092     | -2.27111235 | empty        |            |         |
| 1582 B01 | X | 628  | 640        | -0.63413263 | 592    | 600        | -0.46627159 | 2405029     | -1.58479668 | 2071904     | -1.73066953 | experimental | ChemBridge | 5374569 |
| 1582 B02 | X | 792  | 800        | -0.19518149 | 633    | 640        | -0.32588919 | 3066629     | -0.36460548 | 2392064     | -1.05162704 | experimental | ChemBridge | 5547145 |
| 1582 B03 | X | 672  | 680        | -0.51636525 | 594    | 600        | -0.45942367 | 3451055     | 0.34439274  | 2639984     | -0.52880178 | experimental | ChemBridge | 5380460 |
| 1582 B04 | X | 591  | 600        | -0.73316428 | 433    | 440        | -1.01068139 | 3814007     | 0.10137858  | 2675266     | 0.7518187   | experimental | ChemBridge | 5549121 |
| 1582 B05 | X | 468  | 480        | -0.08812024 | 471    | 480        | -0.80057087 | 2144058     | -0.09270163 | 2301453     | -1.24381456 | experimental | ChemBridge | 5398225 |
| 1582 B06 | X | 791  | 800        | -0.19785803 | 431    | 440        | -1.01752931 | 3295661     | 0.05779904  | 2612000     | -0.58515437 | experimental | ChemBridge | 5452876 |
| 1582 B07 | X | 551  | 560        | -0.84022554 | 874    | 880        | 0.49928542  | 3397726     | 0.24603787  | 2810244     | -0.16468929 | experimental | ChemBridge | 5344384 |
| 1582 B08 | X | 672  | 680        | -0.51636525 | 473    | 480        | -0.87372295 | 3414618     | 0.27719185  | 3038595     | 0.31963115  | experimental | ChemBridge | 5454280 |
| 1582 B09 | X | 553  | 560        | -0.83487247 | 434    | 440        | -1.00725743 | 3476872     | 0.39200712  | 2798671     | -0.18923502 | experimental | ChemBridge | 5345090 |
| 1582 B10 | X | 394  | 400        | -1.26044095 | 515    |            |             |             |             |             |             |              |            |         |

|          |   |  |        |        |             |        |        |             |         |             |         |             |              |            |         |
|----------|---|--|--------|--------|-------------|--------|--------|-------------|---------|-------------|---------|-------------|--------------|------------|---------|
| 1582 C01 | X |  | 1314   | 1320   | 1.20196784  | 874    | 880    | 0.49928542  | 3345562 | 0.14983163  | 2550081 | -0.71648131 | experimental | ChemBridge | 5529092 |
| 1582 C02 | X |  | 788    | 800    | -0.20588762 | 591    | 600    | -0.46969555 | 3294055 | 0.05483709  | 3108071 | 0.46698608  | experimental | ChemBridge | 5403625 |
| 1582 C03 | X |  | 712    | 720    | -0.409304   | 592    | 600    | -0.46627159 | 2966627 | -0.54903952 | 3575973 | 1.45938157  | experimental | ChemBridge | 5531873 |
| 1582 C04 | X |  | 633    | 640    | -0.62074987 | 514    | 520    | -0.73334055 | 3483694 | 0.40458896  | 3697827 | 1.71782748  | experimental | ChemBridge | 5683201 |
| 1582 C05 | X |  | 634    | 640    | -0.18807344 | 594    | 760    | 0.0884101   | 3977139 | 1.3146513   | 3204517 | 0.67154296  | experimental | ChemBridge | 5535556 |
| 1582 C06 | X |  | 632    | 640    | -0.6234265  | 474    | 480    | -0.87029899 | 3487399 | 0.4114221   | 2921824 | 0.07196601  | experimental | ChemBridge | 5686906 |
| 1582 C07 | X |  | 632    | 640    | -0.6234265  | 553    | 560    | -0.59980607 | 4087351 | 1.51791568  | 3263556 | 0.79676157  | experimental | ChemBridge | 5537935 |
| 1582 C08 | X |  | 872    | 880    | 0.01894101  | 433    | 440    | -0.11068139 | 4102122 | 1.54515788  | 3179164 | 0.61777059  | experimental | ChemBridge | 5689208 |
| 1582 C09 | X |  | 832    | 840    | -0.08812024 | 515    | 720    | -0.04512438 | 3207635 | -0.10454762 | 3163660 | 0.58488742  | experimental | ChemBridge | 5539122 |
| 1582 C10 | X |  | 433    | 440    | -1.15605623 | 393    | 400    | -1.14763983 | 3714549 | 0.83035564  | 3263636 | 0.79693125  | experimental | ChemBridge | 5512542 |
| 1582 C11 | X |  | 832    | 840    | -0.08812024 | 554    | 560    | -0.59638211 | 2905550 | -0.66168405 | 2449623 | -0.92594743 | experimental | ChemBridge | 5691491 |
| 1582 C12 | X |  | 712    | 720    | -0.409304   | 634    | 640    | -0.32246522 | 3037476 | -0.41837246 | 2967184 | 0.03159378  | experimental | ChemBridge | 5713892 |
| 1582 C13 | X |  | 553    | 560    | -0.83487247 | 473    | 480    | -0.87372295 | 3104918 | -0.29398895 | 3618305 | 1.54916551  | experimental | ChemBridge | 5695351 |
| 1582 C14 | X |  | 551    | 560    | -0.84022554 | 552    | 560    | -0.60323003 | 2825047 | -0.81015601 | 3829402 | 1.99689112  | experimental | ChemBridge | 5523448 |
| 1582 C15 | X |  | 792    | 800    | -0.19518149 | 914    | 920    | 0.63624386  | 2373423 | -1.64308774 | 2006453 | -1.86948765 | experimental | ChemBridge | 5705264 |
| 1582 C16 | X |  | 991    | 1000   | 0.33744823  | 831    | 840    | 0.3520551   | 2867010 | -0.7327635  | 3506540 | 1.31211783  | experimental | ChemBridge | 5524841 |
| 1582 C17 | X |  | 948    | 960    | 0.22235739  | 1228   | 1240   | 1.71136762  | 2570839 | -1.27899272 | 2722136 | -0.35156172 | experimental | ChemBridge | 5710089 |
| 1582 C18 | X |  | 790    | 800    | -0.20053456 | 591    | 600    | -0.46969555 | 2913601 | -0.64683556 | 2896768 | 0.01882355  | experimental | ChemBridge | 5526290 |
| 1582 C19 | X |  | 1072   | 1080   | 0.55424727  | 593    | 600    | -0.46284763 | 2590849 | -1.2420882  | 2267184 | -1.31649094 | experimental | ChemBridge | 5713892 |
| 1582 C20 | X |  | 910    | 920    | 0.1206492   | 633    | 640    | -0.32588919 | 3671157 | 0.75032763  | 3939707 | 0.107280499 | experimental | ChemBridge | 5367697 |
| 1582 C21 | X |  | 830    | 840    | -0.09347331 | 472    | 480    | -0.87714691 | 3905921 | 1.18330369  | 3151320 | 0.55871493  | experimental | ChemBridge | 5402719 |
| 1582 C22 | X |  | 711    | 720    | -0.41198053 | 551    | 560    | -0.60665399 | 3398964 | 0.24832112  | 2761592 | -0.26787762 | experimental | ChemBridge | 5373525 |
| 1582 C23 | N |  | 940    | 960    | 0.20094514  | 941    | 1400   | 0.72869081  | 3245124 | -0.03540653 | 2671343 | -0.4592941  | empty        |            |         |
| 1582 C24 | P |  | 1628   | 2640   | 2.04239866  | 156665 | 156680 | 533.921596  | 3077811 | -0.34398248 | 2607223 | -0.59528614 | empty        |            |         |
| 1582 D01 | X |  | 790    | 800    | -0.20053456 | 833    | 840    | 0.35890302  | 2936898 | -0.60386882 | 2379907 | -1.07744114 | experimental | ChemBridge | 5375330 |
| 1582 D02 | X |  | 1320   | 1340   | 0.18224671  | 950    | 1320   | 1.19121026  | 3073454 | -0.3536429  | 3274853 | 0.82072191  | experimental | ChemBridge | 5547572 |
| 1582 D03 | X |  | 670    | 680    | -0.52171831 | 1073   | 1080   | 1.18065366  | 3632884 | 0.67974040  | 3696189 | 1.64323144  | experimental | ChemBridge | 5380482 |
| 1582 D04 | X |  | 513    | 520    | -0.94193372 | 393    | 400    | -1.14763983 | 2863974 | -0.73836281 | 3829432 | -0.21519329 | experimental | ChemBridge | 5550024 |
| 1582 D05 | X |  | 474    | 480    | -1.04631844 | 474    | 480    | -0.87029899 | 4222733 | 1.76760117  | 3197243 | 0.65611519  | experimental | ChemBridge | 5398248 |
| 1582 D06 | X |  | 553    | 560    | -0.83487247 | 474    | 480    | -0.87029899 | 3720979 | 0.84221451  | 3325971 | 0.9291405   | experimental | ChemBridge | 5452929 |
| 1582 D07 | X |  | 672    | 680    | -0.51636525 | 514    | 520    | -0.73334055 | 3359351 | 0.17526273  | 3416613 | 1.12138741  | experimental | ChemBridge | 5344542 |
| 1582 D08 | X |  | 751    | 760    | -0.30491928 | 554    | 560    | -0.59638211 | 3628847 | 0.67229514  | 3456975 | 1.20699308  | experimental | ChemBridge | 5455095 |
| 1582 D09 | X |  | 792    | 800    | -0.19518149 | 393    | 400    | -1.14763983 | 4532940 | 2.33971703  | 3523166 | 1.3473807   | experimental | ChemBridge | 5345100 |
| 1582 D10 | X |  | 910    | 920    | -0.10516751 | 633    | 640    | -0.18934053 | 3161064 | -0.4536429  | 3425126 | 1.71544351  | experimental | ChemBridge | 5456285 |
| 1582 D11 | X |  | 910    | 920    | 0.1206492   | 712    | 720    | -0.05539627 | 3938869 | 1.2403812   | 3813162 | 1.96244694  | experimental | ChemBridge | 5346138 |
| 1582 D12 | X |  | 792    | 800    | -0.19518149 | 513    | 520    | -0.73676451 | 3815861 | 1.01720572  | 3376610 | 1.03654315  | experimental | ChemBridge | 5457211 |
| 1582 D13 | X |  | 631    | 640    | -0.62610303 | 594    | 600    | -0.45942367 | 2935407 | -0.60661868 | 3228121 | -1.3993415  | experimental | ChemBridge | 5347263 |
| 1582 D14 | X |  | 1073   | 1080   | 0.5569238   | 714    | 720    | -0.04854834 | 3235242 | -0.05363194 | 2941781 | 0.11429375  | experimental | ChemBridge | 5458055 |
| 1582 D15 | X |  | 471    | 480    | -1.05434804 | 392    | 400    | -1.15106379 | 4142680 | 1.61995915  | 3087266 | 0.42285977  | experimental | ChemBridge | 5348398 |
| 1582 D16 | X |  | 511    | 520    | -0.94728679 | 553    | 560    | -0.59980607 | 3180103 | -0.15532499 | 2698888 | -0.4008695  | experimental | ChemBridge | 5468046 |
| 1582 D17 | X |  | 872    | 880    | 0.01894101  | 671    | 680    | -0.19577862 | 3765233 | 0.92597663  | 3071687 | 0.38981757  | experimental | ChemBridge | 5505846 |
| 1582 D18 | X |  | 990    | 1000   | 0.33477717  | 911    | 920    | 0.62597198  | 3101785 | -0.29397615 | 2796295 | -0.19427439 | experimental | ChemBridge | 5468907 |
| 1582 D19 | X |  | 549    | 560    | -0.8455786  | 511    | 520    | -0.74361243 | 3551985 | 0.53053829  | 3322123 | 0.92116998  | experimental | ChemBridge | 5542117 |
| 1582 D20 | X |  | 1069   | 1080   | 0.54621767  | 792    | 800    | 0.21852062  | 3884303 | 1.14343354  | 2919994 | 0.06808467  | experimental | ChemBridge | 5470201 |
| 1582 D21 | X |  | 670    | 680    | -0.52171831 | 673    | 680    | -0.18893074 | 3615373 | 0.647445    | 3056387 | 0.35736704  | experimental | ChemBridge | 5543531 |
| 1582 D22 | X |  | 748    | 760    | -0.31294887 | 552    | 560    | -0.60323003 | 3717735 | 0.83623159  | 2794454 | -0.19817905 | experimental | ChemBridge | 5471796 |
| 1582 D23 | N |  | 1214   | 1720   | 0.93431471  | 663    | 680    | -0.22317036 | 3701265 | 0.80585592  | 2985835 | 0.20772997  | empty        |            |         |
| 1582 D24 | P |  | 170449 | 171120 | 453.897098  | 1653   | 2520   | 3.16655105  | 2964131 | -0.5536429  | 3377238 | -0.66206416 | empty        |            |         |
| 1582 E01 | X |  | 800    | 800    | -0.19250496 | 594    | 600    | -0.59638211 | 3235676 | -0.05283151 | 2396762 | 0.64166283  | experimental | ChemBridge | 5530148 |
| 1582 E02 | X |  | 1029   | 1040   | 0.43915642  | 792    | 800    | 0.21852062  | 3662721 | 0.73476908  | 3349583 | 0.97922031  | experimental | ChemBridge | 5403662 |
| 1582 E03 | X |  | 750    | 760    | -0.30759581 | 472    | 480    | -0.87714691 | 3376107 | 0.20616588  | 3352420 | 0.98523743  | experimental | ChemBridge | 5532003 |
| 1582 E04 | X |  | 552    | 560    | -0.837549   | 434    | 440    | -1.00725743 | 3913268 | 1.19685379  | 3534427 | 1.37126469  | experimental | ChemBridge | 5683290 |
| 1582 E05 | X |  | 513    | 520    | -0.94193372 | 554    | 560    | -0.59638211 | 3895584 | 1.16423913  | 3374487 | 1.03204038  | experimental | ChemBridge | 5535826 |
| 1582 E06 | X |  | 753    | 760    | -0.29956621 | 554    | 560    | -0.59638211 | 3124516 | -0.25784429 | 3680510 | 1.68109904  | experimental | ChemBridge | 5687035 |
| 1582 E07 | X |  | 871    | 880    | 0.01626448  | 593    | 600    | -0.46284763 | 3724256 | 0.8482583   | 3319509 | 0.91543494  | experimental | ChemBridge | 5538091 |
| 1582 E08 | X |  | 912    | 920    | 0.12602226  | 673    | 680    | -0.18893074 | 4917905 | 0.04970933  | 4045124 | 2.45442612  | experimental | ChemBridge | 5689744 |
| 1582 E09 | X |  | 711    | 720    | -0.41198053 | 553    | 560    | -0.59980607 | 4088913 | 1.52079648  | 3742439 | 1.81244718  | experimental | ChemBridge | 5539968 |
| 1582 E10 | X |  | 591    | 600    | -0.46969555 | 591    | 600    | -0.46969555 | 3663660 | 0.73650088  | 3167729 | 0.59351756  | experimental | ChemBridge | 5512990 |
| 1582 E11 | X |  | 1432   | 1440   | 1.51779853  | 993    | 1000   | 0.90673678  | 3129934 | -0.24785185 | 2699647 | -0.3992597  | experimental | ChemBridge | 5691498 |
| 1582 E12 | X |  | 590    | 600    | -0.73584081 | 593    | 600    | -0.46284763 | 3699300 | 0.80223186  | 2819915 | -0.14417761 | experimental | ChemBridge | 5521390 |
| 1582 E13 | X |  | 632    | 640    | -0.6234265  | 434    | 440    | -1.00725743 | 3690142 | 0.78534173  | 3110816 | 0.47280808  | experimental | ChemBridge | 5696551 |
| 1582 E14 | X |  | 631    | 640    | -0.62610303 | 394    | 400    | -1.14421587 | 3638503 | 0.69010374  | 3710577 | 1.74486956  | experimental | ChemBridge | 5523973 |
| 1582 E15 | X |  | 632    | 640    | -0.6234265  | 434    | 440    | -1.00725743 | 3653891 | 0.71848388  | 3071687 | 0.38981757  | experimental | ChemBridge | 5505269 |
| 1582 E16 | X |  | 712    | 720    | -0.409304   | 553    | 560    | -0.59980607 | 3660028 | 0.72980237  | 3721958 | 1.76908086  | experimental | ChemBridge | 5524906 |
| 1582 E17 | X |  | 430    | 440    | -1.16408582 | 391    | 400    | -1.15448775 | 1950099 | -2.42382567 | 1908640 | -2.07694387 | experimental | ChemBridge | 5710104 |
| 1582 E18 | X |  | 1232   | 1240   | 0.98249227  | 1352   | 1360   | 2.13593879  | 2965988 | -0.55021803 | 3348312 | 0.97652458  | experimental | ChemBridge | 5526577 |
| 1582 E19 | X |  | 707    | 720    | -0.42268665 | 670    | 680    | -0.19920263 | 2085194 | -2.17466949 | 2416311 | -1.00020043 | experimental | ChemBridge | 5714516 |
| 1582 E20 | X |  | 1669   | 1680   | 2.15213645  | 831    | 840    | 0.3520551   | 3661515 | 0.73254854  | 3390100 | 1.06515473  | experimental | ChemBridge | 5367705 |
| 1582 E21 | X |  | 707    | 720    | -0.42268665 | 510    | 520    | -0.74703639 | 4138438 | 1.61213561  | 2981057 | 0.19759608  | experimental | ChemBridge | 5402722 |
| 1582 E22 | X |  | 988    | 1000   | 0.32941864  | 790    | 800    | 0.21852062  | 4162746 | 1.65896694  | 3029226 | 1.04313933  | experimental | ChemBridge | 5373557 |
| 1582 E23 | N |  | 1329   | 2000   | 1.24211581  | 1102   | 1520   | 1.27994853  | 3640592 | 0.50283151  | 2699042 | -0.40054288 | empty        |            |         |
| 1582 E24 | P |  | 226164 | 227240 | 603.020028  | 142224 | 142240 | 484.476175  | 3532978 | 0.49548361  | 2821818 | -0.14014145 | empty        |            |         |
| 1582 F01 | X |  | 632    | 640    | -0.6234265  | 553    | 560    | -0.59980607 | 2844417 | -0.77443185 | 2521905 | -0.77624112 | experimental | ChemBridge | 5375477 |
| 1582 F02 | X |  | 989    | 1000   | 0.33209517  | 753    | 760    | 0.08498614  | 3672868 | 0.75348323  | 2838099 | -0.10561031 | experimental | ChemBridge | 5548259 |
| 1582 F03 | X |  |        |        |             |        |        |             |         |             |         |             |              |            |         |

|          |   |        |        |            |             |      |             |             |             |             |             |             |              |            |         |
|----------|---|--------|--------|------------|-------------|------|-------------|-------------|-------------|-------------|-------------|-------------|--------------|------------|---------|
| 1582 F19 | X |        | 1110   | 1120       | 0.65595546  | 832  | 840         | 0.35547906  | 4015764     | 1.38588752  | 3062964     | 0.37131651  | experimental | ChemBridge | 5542382 |
| 1582 F20 | X |        | 1227   | 1240       | 0.96910962  | 990  | 1000        | 0.8964649   | 3411406     | 0.27126795  | 3378593     | 1.04074899  | experimental | ChemBridge | 5470342 |
| 1582 F21 | X |        | 1150   | 1160       | 0.76301671  | 1031 | 1040        | 1.0368473   | 4069585     | 1.48514978  | 2879462     | -0.01788156 | experimental | ChemBridge | 5543568 |
| 1582 F22 | X |        | 543    | 560        | -0.86163779 | 950  | 960         | 0.75950646  | 3103451     | -0.29669454 | 3754887     | -0.28200857 | experimental | ChemBridge | 5472319 |
| 1582 F23 | N |        | 1295   | 1295       | 1.15111374  | 507  | 520         | -0.75730827 | 3741919     | 0.88083423  | 2714268     | -0.36824933 | empty        |            |         |
| 1582 F24 | P | 197811 | 198480 | 527.132337 | 1105        | 1520 | 1.29022041  | 3221217     | -0.07949829 |             | 2562020     | -0.69115932 | empty        |            |         |
| 1582 G01 | X |        | 793    | 800        | -0.19250496 | 995  | 1000        | 0.9135847   | 3503916     | 0.44188446  | 2843375     | -0.09442019 | experimental | ChemBridge | 5530285 |
| 1582 G02 | X |        | 870    | 880        | 0.01358795  | 590  | 600         | -0.47311951 | 3488265     | 0.41301927  | 2700687     | -0.39705392 | experimental | ChemBridge | 5403706 |
| 1582 G03 | X |        | 750    | 760        | -0.30759581 | 834  | 840         | 0.36232698  | 3323554     | 0.10924219  | 2789322     | -0.20906375 | experimental | ChemBridge | 5532536 |
| 1582 G04 | X |        | 629    | 640        | -0.63145609 | 430  | 440         | -1.02095327 | 3014706     | -0.46036725 | 3348778     | 0.97751294  | experimental | ChemBridge | 5683587 |
| 1582 G05 | X |        | 710    | 720        | -0.41465706 | 672  | 680         | -0.19235471 | 3219132     | -0.08334367 | 3205723     | 0.67410083  | experimental | ChemBridge | 5536284 |
| 1582 G06 | X |        | 1667   | 1680       | 2.14678338  | 1151 | 1160        | 1.44772262  | 3586154     | 0.59355629  | 3254523     | 0.77845143  | experimental | ChemBridge | 5687596 |
| 1582 G07 | X |        | 827    | 840        | -0.1015029  | 629  | 640         | -0.33958503 | 3599365     | 0.61792139  | 3196033     | 0.65354885  | experimental | ChemBridge | 5538279 |
| 1582 G08 | X |        | 710    | 720        | -0.41465706 | 432  | 440         | -1.01410535 | 3624077     | 0.66349782  | 3316504     | 0.90906149  | experimental | ChemBridge | 5690603 |
| 1582 G09 | X |        | 1151   | 1160       | 0.76569324  | 913  | 920         | 0.6328199   | 3256911     | -0.01366772 | 3410753     | 1.10895865  | experimental | ChemBridge | 5540145 |
| 1582 G10 | X |        | 510    | 520        | -0.94996332 | 709  | 720         | -0.06566815 | 3290259     | 0.04783611  | 3734266     | 1.79511268  | experimental | ChemBridge | 5513714 |
| 1582 G11 | X |        | 1113   | 1120       | 0.66398505  | 793  | 800         | 0.22194458  | 3094655     | -0.31291703 | 2758283     | -0.27489594 | experimental | ChemBridge | 5691534 |
| 1582 G12 | X |        | 551    | 560        | -0.84022554 | 512  | 520         | -0.74018847 | 2956396     | -0.56790859 | 3489980     | 1.27699495  | experimental | ChemBridge | 5521408 |
| 1582 G13 | X |        | 632    | 640        | -0.62342655 | 754  | 760         | 0.0884101   | 3122884     | -0.25900989 | 3165905     | 0.58964895  | experimental | ChemBridge | 5698605 |
| 1582 G14 | X |        | 712    | 720        | -0.409304   | 432  | 440         | -1.01410535 | 1278977     | -3.66157833 | 1097703     | -3.79689852 | experimental | ChemBridge | 5524195 |
| 1582 G15 | X |        | 672    | 680        | -0.51636525 | 674  | 680         | -0.18550678 | 3409204     | 0.26720679  | 3094283     | 0.43774246  | experimental | ChemBridge | 5705272 |
| 1582 G16 | X |        | 551    | 560        | -0.84022554 | 511  | 520         | -0.74361243 | 3128696     | -0.2501351  | 3511554     | 1.32275226  | experimental | ChemBridge | 5525122 |
| 1582 G17 | X |        | 593    | 600        | -0.72781122 | 794  | 800         | 0.22536854  | 3543016     | 0.51399673  | 3101755     | 0.45359018  | experimental | ChemBridge | 5710481 |
| 1582 G18 | X |        | 552    | 560        | -0.837549   | 553  | 560         | -0.59980607 | 3270206     | 0.01085229  | 3571081     | 1.44900589  | experimental | ChemBridge | 5527239 |
| 1582 G19 | X |        | 791    | 800        | -0.19785803 | 472  | 480         | -0.87174691 | 3748652     | 0.89325193  | 3564367     | 1.43476585  | experimental | ChemBridge | 5715330 |
| 1582 G20 | X |        | 589    | 600        | -0.73851735 | 500  | 520         | -0.87372295 | 3715427     | 0.83157493  | 3101720     | 0.40899662  | experimental | ChemBridge | 5537938 |
| 1582 G21 | X |        | 906    | 920        | -0.10994803 | 629  | 640         | -0.33958503 | 2897849     | -0.54678578 | 2626239     | -0.55476332 | experimental | ChemBridge | 5402738 |
| 1582 G22 | X |        | 1831   | 1840       | 2.58573452  | 1192 | 1200        | 1.58810502  | 3590942     | 0.45133836  | 2479248     | -0.86671137 | experimental | ChemBridge | 5373646 |
| 1582 G23 | N |        | 828    | 920        | -0.09882637 | 592  | 600         | -0.46627159 | 3233257     | -0.05729288 | 2713657     | -0.36954523 | empty        |            |         |
| 1582 G24 | P | 1339   | 1920   | 1.26888112 | 592         | 600  | -0.46627159 | 3061875     | -0.3733733  |             | 2862621     | -0.05360044 | empty        |            |         |
| 1582 H01 | X |        | 988    | 1000       | 0.32941864  | 631  | 640         | -0.33273711 | 3074218     | -0.35060906 | 2560539     | -0.69430044 | experimental | ChemBridge | 5376208 |
| 1582 H02 | X |        | 948    | 960        | 0.22235739  | 752  | 760         | 0.08156218  | 3459471     | 0.35991439  | 3041744     | 0.32631001  | experimental | ChemBridge | 5548504 |
| 1582 H03 | X |        | 947    | 960        | 0.21968086  | 669  | 680         | -0.20262659 | 3599928     | 0.61895973  | 2748032     | -0.29663767 | experimental | ChemBridge | 5384938 |
| 1582 H04 | X |        | 1300   | 1300       | 0.9995      | 1212 | 1300        | 0.0058229   | 3005829     | 0.0058229   | 3187701     | 1.9643237   | experimental | ChemBridge | 5551121 |
| 1582 H05 | X |        | 465    | 480        | -1.07040723 | 428  | 440         | -1.02780119 | 3193275     | -0.13103182 | 2490142     | -0.84360877 | experimental | ChemBridge | 5401524 |
| 1582 H06 | X |        | 2308   | 2320       | 3.86243994  | 1439 | 1360        | 2.1256669   | 3801697     | 0.991083    | 3494344     | 1.28644165  | experimental | ChemBridge | 5453377 |
| 1582 H07 | X |        | 1386   | 1400       | 1.39467809  | 1340 | 1440        | 2.40300774  | 3716562     | 0.83406823  | 3183818     | 0.62764148  | experimental | ChemBridge | 5344582 |
| 1582 H08 | X |        | 829    | 840        | -0.09614984 | 511  | 520         | -0.74361243 | 3325426     | 0.11269473  | 2941823     | 0.11438283  | experimental | ChemBridge | 5455338 |
| 1582 H09 | X |        | 949    | 960        | 0.22503392  | 591  | 600         | -0.46969555 | 3683289     | 0.77270272  | 3228520     | 0.72245206  | experimental | ChemBridge | 5345123 |
| 1582 H10 | X |        | 872    | 880        | 0.01894101  | 1033 | 1040        | 1.04369522  | 3293547     | 0.05390018  | 2704639     | -0.38867193 | experimental | ChemBridge | 5456382 |
| 1582 H11 | X |        | 720    | 720        | -0.41465706 | 473  | 480         | -0.87372295 | 3476199     | 0.71866544  | 4196159     | 1.13122368  | experimental | ChemBridge | 5346318 |
| 1582 H12 | X |        | 672    | 680        | -0.51636525 | 631  | 640         | -0.32589919 | 3617915     | 0.65213322  | 3595970     | 1.50179415  | experimental | ChemBridge | 5401524 |
| 1582 H13 | X |        | 753    | 760        | -0.29956621 | 553  | 560         | -0.59980607 | 3305515     | 0.0759728   | 3136598     | 0.52749034  | experimental | ChemBridge | 5347538 |
| 1582 H14 | X |        | 509    | 520        | -0.95263985 | 554  | 560         | -0.59638211 | 3226424     | -0.069895   | 2995276     | 0.22775383  | experimental | ChemBridge | 5459498 |
| 1582 H15 | X |        | 832    | 840        | -0.08812024 | 473  | 480         | -0.87372295 | 3818863     | 1.02274232  | 3741765     | 1.81101766  | experimental | ChemBridge | 5348429 |
| 1582 H16 | X |        | 632    | 640        | -0.62342655 | 594  | 600         | -0.45942367 | 3555533     | 0.53708188  | 3225586     | 0.7162292   | experimental | ChemBridge | 5468147 |
| 1582 H17 | X |        | 632    | 640        | -0.62342655 | 553  | 560         | -0.59980607 | 3273336     | 0.01662496  | 3208216     | 0.67938835  | experimental | ChemBridge | 5541090 |
| 1582 H18 | X |        | 720    | 720        | -0.409304   | 473  | 480         | -0.87372295 | 3293239     | 0.0513034   | 3011745     | 0.08340003  | experimental | ChemBridge | 5469117 |
| 1582 H19 | X |        | 710    | 720        | -0.41465706 | 593  | 600         | -0.46284763 | 1.54534     | 1.64182152  | 3157837     | 0.57253714  | experimental | ChemBridge | 5425296 |
| 1582 H20 | X |        | 791    | 800        | -0.19785803 | 632  | 640         | -0.32931315 | 3152640     | -0.20597509 | 2951900     | 0.13575562  | experimental | ChemBridge | 5470712 |
| 1582 H21 | X |        | 1111   | 1120       | 0.65863199  | 793  | 800         | 0.22194458  | 3852056     | 1.08396028  | 3161462     | 0.58022558  | experimental | ChemBridge | 5544981 |
| 1582 H22 | X |        | 714    | 800        | -0.40395093 | 711  | 720         | -0.05882023 | 3214934     | -0.09108605 | 2606815     | -0.59615148 | experimental | ChemBridge | 5472654 |
| 1582 H23 | N | 26149  | 26160  | 67.6736224 | 393         | 400  | -1.14763983 | 3578422     | 0.57929614  |             | 2862167     | -0.05456335 | empty        |            |         |
| 1582 H24 | P | 1236   | 1320   | 0.9931984  | 552         | 560  | -0.60323003 | 3200919     | -0.11693397 | 2779671     | -0.22953302 |             | empty        |            |         |
| 1582 I01 | X |        | 2311   | 2320       | 3.87046954  | 1254 | 1240        | 1.73191139  | 3642171     | 0.69686864  | 2576584     | -0.66026984 | experimental | ChemBridge | 5530417 |
| 1582 I02 | X |        | 1184   | 1200       | 0.85401877  | 790  | 800         | 0.21167269  | 3268204     | 0.00716     | 2788578     | -0.21424735 | experimental | ChemBridge | 5403785 |
| 1582 I03 | X |        | 1429   | 1440       | 1.50976894  | 832  | 840         | 0.35547906  | 2886427     | -0.69695266 | 3046308     | 0.33599001  | experimental | ChemBridge | 5532332 |
| 1582 I04 | X |        | 867    | 880        | 0.00555835  | 590  | 600         | -0.47311951 | 3825318     | 1.0346473   | 3202015     | 0.66623635  | experimental | ChemBridge | 5683618 |
| 1582 I05 | X |        | 753    | 760        | -0.29956621 | 634  | 640         | -0.32246522 | 3608717     | 0.63516931  | 2982771     | 0.20123138  | experimental | ChemBridge | 5536352 |
| 1582 I06 | X |        | 666    | 680        | -0.53242444 | 590  | 600         | -0.47311951 | 3374866     | 0.2038771   | 2882732     | -0.01094606 | experimental | ChemBridge | 5687930 |
| 1582 I07 | X |        | 870    | 880        | 0.01358795  | 791  | 800         | 0.21509665  | 3492486     | 0.42080407  | 3236202     | 0.73874518  | experimental | ChemBridge | 5538389 |
| 1582 I08 | X |        | 671    | 680        | -0.51904178 | 552  | 560         | -0.60323003 | 3478555     | 0.39511108  | 3269608     | 0.80959755  | experimental | ChemBridge | 5691373 |
| 1582 I09 | X |        | 832    | 840        | -0.08812024 | 473  | 480         | -0.87372295 | 3476199     | 0.39628221  | 3174063     | 0.60695164  | experimental | ChemBridge | 5540232 |
| 1582 I10 | X |        | 471    | 480        | -1.05434804 | 552  | 560         | -0.60323003 | 3185384     | -0.14558522 | 3281349     | 0.83449959  | experimental | ChemBridge | 5517937 |
| 1582 I11 | X |        | 632    | 640        | -0.62342655 | 593  | 600         | -0.46284763 | 2873709     | -0.72040851 | 2958812     | 0.15041561  | experimental | ChemBridge | 5691552 |
| 1582 I12 | X |        | 673    | 680        | -0.51368872 | 673  | 680         | -0.18893074 | 3537339     | 0.50352662  | 2892202     | 0.00913931  | experimental | ChemBridge | 5521481 |
| 1582 I13 | X |        | 549    | 560        | -0.8455786  | 592  | 600         | -0.46627159 | 3203640     | -0.11191562 | 3119172     | 0.49053072  | experimental | ChemBridge | 5701409 |
| 1582 I14 | X |        | 1385   | 1400       | 1.39200156  | 753  | 760         | 0.08498614  | 2838256     | -0.78579461 | 2584630     | -0.6432047  | experimental | ChemBridge | 5524395 |
| 1582 I15 | X |        | 789    | 800        | -0.20321109 | 673  | 680         | -0.18893074 | 3789914     | 0.96935158  | 3235069     | 0.73634215  | experimental | ChemBridge | 5705296 |
| 1582 I16 | X |        | 880    | 880        | 0.01526448  | 593  | 600         | -0.46284763 | 3919281     | 1.20794359  | 3011745     | 0.27540903  | experimental | ChemBridge | 5525212 |
| 1582 I17 | X |        | 831    | 840        | -0.09079677 | 552  | 560         | -0.60323003 | 3586160     | 0.59356736  | 2941270     | 0.13209995  | experimental | ChemBridge | 5710568 |
| 1582 I18 | X |        | 830    | 840        | -0.09347331 | 633  | 640         | -0.32589919 | 3671907     | 0.75171085  | 2990190     | 0.21696669  | experimental | ChemBridge | 5527376 |
| 1582 I19 | X |        | 1151   | 1160       | 0.76569324  | 672  | 680         | -0.19235471 | 4045486     | 1.44070391  | 3353028     | 0.98652697  | experimental | ChemBridge | 5716268 |
| 1582 I20 | X |        | 670    | 680        | -0.52171831 | 753  | 760         | 0.08498614  | 3927864     | 1.22377324  | 2867937     | -0.04232548 | experimental | ChemBridge | 5373044 |
| 1582 I21 | X | </     |        |            |             |      |             |             |             |             |             |             |              |            |         |

|          |   |      |      |             |             |        |             |             |             |            |          |             |              |            |         |
|----------|---|------|------|-------------|-------------|--------|-------------|-------------|-------------|------------|----------|-------------|--------------|------------|---------|
| 1582 J13 | X |      | 784  | 800         | -0.21659374 | 674    | 680         | -0.18550678 | 3714463     | 0.83019703 | 2487461  | -0.84929503 | experimental | ChemBridge | 5347572 |
| 1582 J14 | X | 3347 | 3360 | 6.64335595  | 591         | 600    | -0.46969555 | 3297380     | 0.06069639  |            | 3173800  | 0.60639383  | experimental | ChemBridge | 5459563 |
| 1582 J15 | X | 744  | 760  | -0.3236655  | 593         | 600    | -0.46284763 | 3914565     | 1.19924585  |            | 2881112  | -0.014382   | experimental | ChemBridge | 5348610 |
| 1582 J16 | X | 670  | 680  | -0.52171831 | 473         | 480    | -0.87372295 | 3792630     | 0.9743607   |            | 3427306  | 1.14406669  | experimental | ChemBridge | 5468155 |
| 1582 J17 | X | 791  | 800  | -0.19785803 | 833         | 840    | -0.35890302 | 3536325     | 0.50165655  |            | 2697897  | -0.04241032 | experimental | ChemBridge | 5541175 |
| 1582 J18 | X | 590  | 600  | -0.73584081 | 632         | 640    | -0.32931315 | 3642970     | 0.69834224  |            | 3090443  | 0.42959802  | experimental | ChemBridge | 5469146 |
| 1582 J19 | X | 991  | 1000 | 0.33744823  | 673         | 680    | -0.18893074 | 3371766     | 0.19815976  |            | 2963725  | 0.16083582  | experimental | ChemBridge | 5542543 |
| 1582 J20 | X | 750  | 760  | -0.30759581 | 550         | 560    | -0.61007795 | 3505178     | 0.44421197  |            | 2761998  | -0.26701652 | experimental | ChemBridge | 5470864 |
| 1582 J21 | X | 831  | 840  | -0.09079677 | 1432        | 1440   | 2.40985567  | 2532624     | -1.34947278 |            | 2647102  | -0.51070488 | experimental | ChemBridge | 5545481 |
| 1582 J22 | X | 711  | 720  | -0.41198053 | 827         | 840    | 0.33835925  | 3522228     | 0.47565735  |            | 3063780  | 0.3728945   | experimental | ChemBridge | 5472848 |
| 1582 J23 | N | 711  | 720  | -0.41198053 | 1131        | 1640   | 1.3792434   | 3218642     | -0.08424737 |            | 2920705  | 0.06959267  | empty        |            |         |
| 1582 J24 | P | 553  | 560  | -0.83487447 | 17431       | 17280  | 567.903765  | 3075142     | -0.34890493 |            | 3371174  | 0.26080879  | empty        |            |         |
| 1582 K01 | X | 1312 | 1320 | 1.19661478  | 994         | 1000   | 0.91016074  | 2930439     | -0.61578118 |            | 2646726  | -0.51150236 | experimental | ChemBridge | 5531136 |
| 1582 K02 | X | 787  | 800  | -0.20856415 | 790         | 800    | 0.21167269  | 4125639     | 1.58853037  |            | 3524612  | 1.35044759  | experimental | ChemBridge | 5403790 |
| 1582 K03 | X | 1031 | 1040 | 0.44450948  | 793         | 800    | 0.22194458  | 2418708     | -1.55956845 |            | 2244652  | -1.36428012 | experimental | ChemBridge | 5534332 |
| 1582 K04 | X | 868  | 880  | 0.00823488  | 592         | 600    | -0.46627159 | 3428148     | 0.30214528  |            | 3384964  | 1.05426154  | experimental | ChemBridge | 5684463 |
| 1582 K05 | X | 1351 | 1360 | 1.3009995   | 673         | 680    | -0.18893074 | 3703793     | 0.81051831  |            | 3169615  | 0.59751766  | experimental | ChemBridge | 5537260 |
| 1582 K06 | X | 1109 | 1120 | 0.65327892  | 992         | 1000   | 0.90331282  | 3781957     | 0.95467645  |            | 3497745  | 1.29344641  | experimental | ChemBridge | 5688362 |
| 1582 K07 | X | 830  | 840  | -0.09347331 | 752         | 760    | 0.08156218  | 3852305     | 1.08442136  |            | 3371174  | 1.02501368  | experimental | ChemBridge | 5538527 |
| 1582 K08 | X | 871  | 880  | 0.01626448  | 591         | 600    | -0.46969555 | 3554269     | 0.53475068  |            | 3761724  | 1.85334965  | experimental | ChemBridge | 5691375 |
| 1582 K09 | X | 871  | 880  | 0.01626448  | 673         | 680    | -0.18893074 | 3597811     | 0.61505534  |            | 3379342  | 1.04233758  | experimental | ChemBridge | 5540414 |
| 1582 K10 | X | 671  | 680  | -0.51904178 | 552         | 560    | -0.60323003 | 3243267     | -0.0388314  |            | 3785439  | 1.90364792  | experimental | ChemBridge | 5513749 |
| 1582 K11 | X | 592  | 600  | -0.73048775 | 593         | 600    | -0.46284763 | 2802611     | -0.85153481 |            | 3367721  | 1.01769005  | experimental | ChemBridge | 5691553 |
| 1582 K12 | X | 520  | 520  | -0.94461026 | 474         | 480    | -0.87029899 | 3865614     | 0.59422024  |            | 3277975  | 0.82734351  | experimental | ChemBridge | 5521620 |
| 1582 K13 | X | 829  | 840  | -0.09614984 | 432         | 440    | -1.01410535 | 3840142     | 1.06198725  |            | 3210579  | 0.68440015  | experimental | ChemBridge | 5703585 |
| 1582 K14 | X | 503  | 520  | -0.70783225 | 1063        | 1080   | 1.04369522  | 3622799     | 0.6611408   |            | 3651781  | 1.76737562  | experimental | ChemBridge | 5524610 |
| 1582 K15 | X | 589  | 600  | -0.38857037 | 512         | 520    | -0.74018847 | 3818182     | -0.40170703 |            | 2990606  | 0.67844746  | experimental | ChemBridge | 5705352 |
| 1582 K16 | X | 871  | 880  | 0.01626448  | 433         | 440    | -1.01068139 | 3569442     | 0.56273429  |            | 3367463  | 1.01714285  | experimental | ChemBridge | 5525229 |
| 1582 K17 | X | 911  | 920  | 0.12332573  | 672         | 680    | -0.19235471 | 3001944     | -0.48390246 |            | 2778559  | -0.23337617 | experimental | ChemBridge | 5711169 |
| 1582 K18 | X | 792  | 800  | -0.19518149 | 673         | 680    | -0.18893074 | 3956440     | 1.27647606  |            | 3238390  | 0.74338581  | experimental | ChemBridge | 5527466 |
| 1582 K19 | X | 670  | 680  | -0.52171831 | 633         | 640    | -0.32588919 | 3266876     | 0.00471076  |            | 3528405  | 1.35849235  | experimental | ChemBridge | 5718334 |
| 1582 K20 | X | 951  | 960  | -0.23038698 | 513         | 520    | -0.73676451 | 3765647     | 0.92459586  |            | 2988829  | 0.2134438   | experimental | ChemBridge | 5373315 |
| 1582 K21 | X | 909  | 920  | 0.11797267  | 629         | 640    | -0.33958503 | 3486859     | 0.41042618  |            | 2802802  | -0.18047338 | experimental | ChemBridge | 5402808 |
| 1582 K22 | X | 829  | 840  | -0.0824897  | 789         | 800    | -0.6824897  | 3174443     | 0.61030263  |            | 3092920  | 0.82892803  | experimental | ChemBridge | 5475410 |
| 1582 K23 | N | 1230 | 1240 | 0.97713921  | 1232        | 1600   | 1.72506346  | 3515102     | 0.46251484  |            | 3084980  | 0.41801129  | empty        |            |         |
| 1582 K24 | P | 909  | 920  | 0.11797267  | 123487      | 124000 | 420.321417  | 3258029     | -0.01160579 |            | 2634900  | -0.53658468 | empty        |            |         |
| 1582 L01 | X | 1028 | 1040 | 0.43647989  | 711         | 720    | -0.05882023 | 2866787     | -0.73317478 |            | 2300456  | -1.24592278 | experimental | ChemBridge | 5378055 |
| 1582 L02 | X | 1390 | 1400 | 1.40538422  | 1112        | 1120   | 1.31418814  | 2836752     | -0.78856844 |            | 2572159  | -0.66889149 | experimental | ChemBridge | 5549455 |
| 1582 L03 | X | 628  | 640  | -0.63413263 | 391         | 400    | -1.15448775 | 3851708     | 1.08331847  |            | 2919310  | 0.06663395  | experimental | ChemBridge | 5391110 |
| 1582 L04 | X | 911  | 920  | 0.12332573  | 714         | 720    | -0.04854834 | 3782659     | 0.95597115  |            | 2849788  | -0.08081855 | experimental | ChemBridge | 5551608 |
| 1582 L05 | X | 509  | 520  | -0.67332003 | 552         | 560    | -0.60323003 | 3613989     | 0.64489248  |            | 3211675  | 0.60280703  | experimental | ChemBridge | 5402660 |
| 1582 L06 | X | 590  | 600  | -0.73584081 | 512         | 560    | -0.60323003 | 3529231     | 0.4885730   |            | 3211675  | 0.68672471  | experimental | ChemBridge | 5453984 |
| 1582 L07 | X | 748  | 760  | -0.31294887 | 630         | 640    | -0.33616107 | 4107784     | 1.55560033  |            | 3652015  | 1.62066264  | experimental | ChemBridge | 5344688 |
| 1582 L08 | X | 710  | 720  | -0.41465706 | 713         | 720    | -0.0519723  | 1643022     | -2.99016886 |            | 1652999  | -2.61914496 | experimental | ChemBridge | 5455898 |
| 1582 L09 | X | 871  | 880  | 0.01626448  | 512         | 520    | -0.74018847 | 3727267     | 0.93757976  |            | 3329127  | 0.93583421  | experimental | ChemBridge | 5345258 |
| 1582 L10 | X | 791  | 800  | -0.19785803 | 913         | 920    | 0.6328199   | 2356757     | -1.6738249  |            | 2226699  | -1.40235749 | experimental | ChemBridge | 5456609 |
| 1582 L11 | X | 912  | 920  | 0.12602026  | 753         | 760    | 0.08498614  | 3796661     | 0.9319989   |            | 3296951  | 0.86759061  | experimental | ChemBridge | 5346749 |
| 1582 L12 | X | 829  | 840  | -0.7316428  | 513         | 520    | -0.74018847 | 3018518     | -0.45338677 |            | 2045358  | -0.42087003 | experimental | ChemBridge | 5457520 |
| 1582 L13 | X | 831  | 840  | -0.09079677 | 673         | 680    | -0.18893074 | 4137081     | 1.60632889  |            | 3197378  | 0.65640152  | experimental | ChemBridge | 5347619 |
| 1582 L14 | X | 1069 | 1080 | 0.54621767  | 951         | 960    | 0.76293042  | 2966166     | -0.54988975 |            | 2576000  | -0.66150847 | experimental | ChemBridge | 5459675 |
| 1582 L15 | X | 591  | 600  | -0.73316428 | 832         | 840    | 0.35547906  | 3825495     | 1.03497374  |            | 3109176  | 0.46932973  | experimental | ChemBridge | 5348682 |
| 1582 L16 | X | 791  | 800  | -0.19785803 | 713         | 720    | -0.0519723  | 3254994     | -0.01720325 |            | 1346965  | 0.54947821  | experimental | ChemBridge | 5468341 |
| 1582 L17 | X | 751  | 760  | -0.30491928 | 671         | 680    | -0.19577867 | 4133622     | 1.60325345  |            | 3263548  | 0.79674461  | experimental | ChemBridge | 5541245 |
| 1582 L18 | X | 671  | 680  | -0.51904178 | 592         | 600    | -0.46627159 | 3282882     | 0.03423068  |            | 2925917  | 0.08064704  | experimental | ChemBridge | 5469336 |
| 1582 L19 | X | 711  | 720  | -0.41198053 | 633         | 640    | -0.32588919 | 3728662     | 0.8563843   |            | 2984844  | 0.20562811  | experimental | ChemBridge | 5542614 |
| 1582 L20 | X | 591  | 600  | -0.73316428 | 592         | 600    | -0.46627159 | 3589311     | 0.59378976  |            | 3092800  | 0.43459709  | experimental | ChemBridge | 5471413 |
| 1582 L21 | X | 908  | 920  | 0.11529614  | 951         | 960    | 0.76293042  | 3931246     | 1.23001068  |            | 3577283  | 1.46216001  | experimental | ChemBridge | 5545932 |
| 1582 L22 | X | 869  | 880  | 0.01091142  | 630         | 640    | -0.33616107 | 3367502     | 0.19029564  |            | 3228942  | 0.7233471   | experimental | ChemBridge | 5473010 |
| 1582 L23 | N | 743  | 760  | -0.32633153 | 781         | 800    | 0.18085704  | 4616710     | 2.49421434  |            | 2891890  | 0.00847757  | empty        |            |         |
| 1582 L24 | P | 1465 | 2000 | 1.60612406  | 1793        | 2640   | 3.64590559  | 3227879     | -0.06721154 |            | 2552954  | -0.71038783 | empty        |            |         |
| 1582 M01 | X | 1392 | 1400 | 1.41073728  | 913         | 920    | 0.6328199   | 3635281     | 0.68416139  |            | 3000573  | 0.23898849  | experimental | ChemBridge | 5531412 |
| 1582 M02 | X | 828  | 840  | -0.09882637 | 830         | 840    | 0.34863113  | 3129779     | -0.24813772 |            | 2725367  | -0.34470894 | experimental | ChemBridge | 5404081 |
| 1582 M03 | X | 711  | 720  | -0.41198053 | 512         | 520    | -0.74018847 | 2567985     | -1.28425636 |            | 2777787  | -1.23852888 | experimental | ChemBridge | 5534523 |
| 1582 M04 | X | 911  | 920  | 0.12332573  | 632         | 640    | -0.32931315 | 2543294     | 1.32979406  |            | 2715795  | -0.35852686 | experimental | ChemBridge | 5685868 |
| 1582 M05 | X | 751  | 760  | -0.30491928 | 633         | 640    | -0.32588919 | 2818640     | -0.82197246 |            | 2869967  | -0.03801996 | experimental | ChemBridge | 5537273 |
| 1582 M06 | X | 708  | 720  | -0.42001012 | 631         | 640    | -0.33273711 | 2847703     | -0.76837147 |            | 2587421  | -0.63728514 | experimental | ChemBridge | 5688578 |
| 1582 M07 | X | 1830 | 1840 | 2.58305799  | 1352        | 1360   | 2.13593879  | 3714937     | 0.83107123  |            | 3484879  | 1.26617599  | experimental | ChemBridge | 5538561 |
| 1582 M08 | X | 909  | 920  | 0.11797267  | 750         | 760    | 0.07471425  | 3237344     | -0.04975521 |            | 2809102  | -0.16711142 | experimental | ChemBridge | 5691429 |
| 1582 M09 | X | 711  | 720  | -0.41198053 | 553         | 560    | -0.59980607 | 2913635     | -0.64677285 |            | 30704956 | 0.39675091  | experimental | ChemBridge | 5540425 |
| 1582 M10 | X | 829  | 840  | -0.19785803 | 592         | 600    | -0.46627159 | 3468890     | 0.37725889  |            | 2762785  | 0.66276511  | experimental | ChemBridge | 5513753 |
| 1582 M11 | X | 670  | 680  | -0.52171831 | 432         | 440    | -1.01410535 | 3217289     | -0.08674272 |            | 2830055  | -0.122671   | experimental | ChemBridge | 5691559 |
| 1582 M12 | X | 872  | 880  | 0.01894101  | 674         | 680    | -0.18550678 | 3072114     | -0.35448948 |            | 2832102  | -0.11832963 | experimental | ChemBridge | 5522446 |
| 1582 M13 | X | 750  | 760  | -0.30759581 | 552         | 560    | -0.60323003 | 3225660     | -0.07130405 |            | 2569131  | -0.67607726 | experimental | ChemBridge | 5703669 |
| 1582 M14 | X | 991  | 1000 | 0.33744823  | 551         | 560    | -0.60665399 | 2722668     | -0.99897396 |            | 2335072  | -1.17250407 | experimental | ChemBridge | 5524582 |
| 1582 M15 | X | 591  |      |             |             |        |             |             |             |            |          |             |              |            |         |



|          |   |        |        |             |      |      |             |         |             |         |              |              |            |         |
|----------|---|--------|--------|-------------|------|------|-------------|---------|-------------|---------|--------------|--------------|------------|---------|
| 1582 N07 | X | 1067   | 1080   | 0.54086461  | 830  | 840  | 0.34863113  | 3272903 | 0.01582638  | 2707034 | -0.38359227  | experimental | ChemBridge | 5344703 |
| 1582 N08 | X | 667    | 680    | -0.52974791 | 669  | 680  | -0.20262659 | 3328291 | 0.11797866  | 2771805 | -0.24621639  | experimental | ChemBridge | 5456002 |
| 1582 N09 | X | 630    | 600    | -0.62877956 | 591  | 600  | -0.46969555 | 2880792 | -0.70734531 | 2486927 | -0.85042761  | experimental | ChemBridge | 5345322 |
| 1582 N10 | X | 792    | 800    | -0.19518149 | 712  | 800  | -0.05359627 | 3245020 | -0.03159834 | 2683378 | -0.42116066  | experimental | ChemBridge | 5456110 |
| 1582 N11 | X | 911    | 840    | -0.19788503 | 793  | 800  | 0.22194468  | 3087789 | -0.3255708  | 2688828 | 0.02544091   | experimental | ChemBridge | 5347042 |
| 1582 N12 | X | 631    | 640    | -0.62610303 | 590  | 600  | -0.47311951 | 3110346 | -0.28397807 | 2919483 | 0.06700087   | experimental | ChemBridge | 5457649 |
| 1582 N13 | X | 711    | 720    | -0.41198053 | 692  | 1000 | 0.90331282  | 2818777 | -0.8217198  | 2924002 | 0.07658543   | experimental | ChemBridge | 5347942 |
| 1582 N14 | X | 830    | 840    | -0.09347331 | 791  | 800  | 0.21509665  | 3382242 | 0.21748068  | 2971605 | 0.17754889   | experimental | ChemBridge | 5460361 |
| 1582 N15 | X | 871    | 880    | 0.01626448  | 811  | 920  | 0.62597198  | 3264935 | 0.001113097 | 2463786 | -0.89950846  | experimental | ChemBridge | 5348721 |
| 1582 N16 | X | 831    | 840    | -0.09079677 | 811  | 920  | 0.62597198  | 2869368 | -0.72841464 | 2604972 | -0.60006039  | experimental | ChemBridge | 5464896 |
| 1582 N17 | X | 548    | 560    | -0.84825513 | 666  | 680  | -0.21289847 | 3031614 | -0.42918377 | 2533549 | -0.75154481  | experimental | ChemBridge | 5541701 |
| 1582 N18 | X | 1391   | 1400   | 1.40806075  | 1512 | 1520 | 2.68377255  | 2830677 | -0.79977258 | 2524302 | -0.77393565  | experimental | ChemBridge | 5459507 |
| 1582 N19 | X | 668    | 680    | -0.52707137 | 789  | 800  | 0.20824873  | 3220401 | -0.08100324 | 2480241 | -0.86460827  | experimental | ChemBridge | 5542762 |
| 1582 N20 | X | 1071   | 1080   | 0.55157074  | 791  | 760  | 0.07813821  | 3152742 | -0.20578698 | 2768427 | -0.25338095  | experimental | ChemBridge | 5471423 |
| 1582 N21 | X | 866    | 880    | 0.00288182  | 668  | 680  | -0.20605055 | 2779980 | -0.89327324 | 2313214 | -1.21886373  | experimental | ChemBridge | 5546256 |
| 1582 N22 | X | 946    | 960    | 0.21700432  | 910  | 920  | 0.62254802  | 3126141 | -0.25484729 | 2606566 | -0.5966796   | experimental | ChemBridge | 5473158 |
| 1582 N23 | N | 1482   | 2080   | 1.6516251   | 944  | 960  | 0.73896269  | 3197789 | -0.12270664 | 2830110 | -0.12255455  | empty        |            |         |
| 1582 N24 | P | 201733 | 202280 | 537.629693  | 1628 | 2120 | 3.08095203  | 3213651 | -0.09345229 | 2626222 | -0.55499026  | empty        |            |         |
| 1582 O01 | X | 1264   | 1280   | 1.06814127  | 985  | 1000 | 0.87934509  | 3458818 | 0.35871006  | 2674456 | -0.45268849  | experimental | ChemBridge | 5531672 |
| 1582 O02 | X | 788    | 800    | -0.20588762 | 909  | 920  | 0.61912405  | 2209079 | -1.94618795 | 2055262 | -1.76596633  | experimental | ChemBridge | 5683061 |
| 1582 O03 | X | 867    | 880    | 0.00555835  | 707  | 720  | -0.07251607 | 2766869 | -0.9174539  | 2945270 | 0.12169374   | experimental | ChemBridge | 5534717 |
| 1582 O04 | X | 1466   | 1480   | 1.68008006  | 1467 | 1480 | 2.5296943   | 2511426 | -1.38856832 | 2689796 | -0.42015315  | experimental | ChemBridge | 5686208 |
| 1582 O05 | X | 903    | 920    | 0.10191348  | 828  | 840  | 0.34178321  | 2795808 | -0.8640816  | 2904339 | 0.03488124   | experimental | ChemBridge | 5537370 |
| 1582 O06 | X | 2349   | 2360   | 3.97217772  | 1191 | 1200 | 1.58468106  | 3029915 | -0.43231724 | 2638728 | -0.52846569  | experimental | ChemBridge | 5688649 |
| 1582 O07 | X | 942    | 960    | 0.20629882  | 787  | 800  | 0.20140081  | 3977431 | 1.31518984  | 2817135 | -0.15007385  | experimental | ChemBridge | 5539300 |
| 1582 O08 | X | 1948   | 1960   | 2.89889806  | 1708 | 1960 | 3.35486891  | 3149390 | -0.21196808 | 2641315 | -1.00612603  | experimental | ChemBridge | 5541479 |
| 1582 O09 | X | 1309   | 1320   | 1.18885118  | 1148 | 1160 | 1.43745074  | 3026444 | -0.43871882 | 2630322 | -0.54628377  | experimental | ChemBridge | 5540481 |
| 1582 O10 | X | 589    | 600    | -0.73851735 | 870  | 880  | 0.48558958  | 2993789 | -0.49894455 | 2731658 | -0.33136606  | experimental | ChemBridge | 5513831 |
| 1582 O11 | X | 952    | 960    | 0.23306351  | 670  | 680  | -0.19920263 | 3021848 | -0.44719524 | 2754207 | -0.28354082  | experimental | ChemBridge | 5692598 |
| 1582 O12 | X | 749    | 760    | -0.31027234 | 950  | 960  | 0.75950646  | 3051425 | -0.39264627 | 3142981 | 0.54102835   | experimental | ChemBridge | 5522990 |
| 1582 O13 | X | 991    | 1000   | 0.33744823  | 910  | 920  | 0.62254802  | 2528143 | -1.35737731 | 2396731 | -1.04172858  | experimental | ChemBridge | 5705187 |
| 1582 O14 | X | 750    | 760    | -0.30759581 | 750  | 760  | 0.07471425  | 2943648 | -0.59141797 | 2907690 | 0.04198854   | experimental | ChemBridge | 5524754 |
| 1582 O15 | X | 710    | 720    | -0.41465706 | 669  | 680  | -0.20262659 | 2844895 | -0.77355028 | 2793167 | -0.200990871 | experimental | ChemBridge | 5705403 |
| 1582 O16 | X | 990    | 1000   | 0.72929079  | 749  | 760  | -0.20053459 | 2122340 | -0.82067019 | 2694265 | -0.247806778 | experimental | ChemBridge | 5526221 |
| 1582 O17 | X | 1031   | 1040   | 0.44450948  | 1352 | 1360 | 2.13593879  | 1964299 | -2.39763656 | 1762667 | -2.38654491  | experimental | ChemBridge | 5711914 |
| 1582 O18 | X | 868    | 880    | 0.00823488  | 627  | 640  | -0.34643295 | 2830717 | -0.79969881 | 2600434 | -0.60986825  | experimental | ChemBridge | 5528440 |
| 1582 O19 | X | 750    | 760    | -0.30759581 | 791  | 800  | 0.21509665  | 3247967 | -0.03016317 | 2663409 | -0.47611859  | experimental | ChemBridge | 5719821 |
| 1582 O20 | X | 987    | 1000   | 0.32674211  | 749  | 760  | 0.07129029  | 3462767 | 0.36599322  | 2775852 | -0.23763291  | experimental | ChemBridge | 5373446 |
| 1582 O21 | X | 1149   | 1160   | 0.76034018  | 1191 | 1200 | 1.58468106  | 3046089 | -0.40248748 | 2770612 | -0.24874668  | experimental | ChemBridge | 5402894 |
| 1582 O22 | X | 986    | 1000   | 0.32465558  | 909  | 920  | 0.61912405  | 3059562 | -0.37763918 | 2941636 | -0.11398622  | experimental | ChemBridge | 5374458 |
| 1582 O23 | X | 1400   | 1362   | 25.5972     | 749  | 760  | 0.08159218  | 3055342 | -0.38357802 | 2647333 | -0.71806778  | empty        |            |         |
| 1582 O24 | P | 2473   | 3800   | 4.3040676   | 947  | 960  | 0.74923457  | 2646685 | -1.13910867 | 2293035 | -1.06166233  | empty        |            |         |
| 1582 P01 | X | 3673   | 3680   | 7.51590515  | 3474 | 3480 | 9.40158406  | 2149382 | -2.05628734 | 1878872 | -2.14008023  | experimental | ChemBridge | 5380201 |
| 1582 P02 | X | 1143   | 1160   | 0.74428099  | 1144 | 1160 | 1.42375489  | 2529564 | -1.35511634 | 2280231 | -1.28881894  | experimental | ChemBridge | 5549815 |
| 1582 P03 | X | 1508   | 1520   | 1.72121491  | 1189 | 1200 | 1.57783314  | 2912666 | -0.64855998 | 2175717 | -1.51048763  | experimental | ChemBridge | 5397643 |
| 1582 P04 | X | 2148   | 2160   | 3.43419494  | 1950 | 1960 | 4.18346747  | 2762937 | -0.92470577 | 2531057 | -0.75683021  | experimental | ChemBridge | 5553381 |
| 1582 P05 | X | 1268   | 1280   | 1.10788474  | 790  | 800  | 0.21672689  | 2417965 | -2.05890072 | 2060208 | -1.75547613  | experimental | ChemBridge | 5402425 |
| 1582 P06 | X | 947    | 960    | 0.21968006  | 752  | 760  | 0.08159218  | 2512796 | -1.38984163 | 2641315 | -1.24712132  | experimental | ChemBridge | 9451213 |
| 1582 P07 | X | 951    | 960    | 0.23038698  | 831  | 840  | 0.35205051  | 2932767 | -0.61146559 | 2652082 | -0.50014256  | experimental | ChemBridge | 5344828 |
| 1582 P08 | X | 1229   | 1240   | 0.97446268  | 1430 | 1440 | 2.400300774 | 2921191 | -0.6328373  | 2640692 | -0.52430015  | experimental | ChemBridge | 5456108 |
| 1582 P09 | X | 751    | 760    | -0.30491928 | 830  | 840  | 0.34863113  | 2763607 | -0.92347002 | 2813360 | -0.6501402   | experimental | ChemBridge | 5345446 |
| 1582 P10 | X | 634    | 640    | -0.61807344 | 793  | 800  | 0.22194458  | 2368587 | -1.65200679 | 2330210 | -1.18281611  | experimental | ChemBridge | 5457054 |
| 1582 P11 | X | 752    | 760    | -0.30224275 | 752  | 760  | 0.08156218  | 3274326 | 0.01845082  | 2833012 | -0.11639957  | experimental | ChemBridge | 5347092 |
| 1582 P12 | X | 1313   | 1320   | 1.19929131  | 1183 | 1160 | 1.45457054  | 3013178 | -0.46318535 | 2561233 | -0.6928285   | experimental | ChemBridge | 5457747 |
| 1582 P13 | X | 791    | 800    | -0.19785803 | 831  | 840  | 0.35205051  | 2553966 | -1.31011165 | 2219567 | -1.41748409  | experimental | ChemBridge | 5348282 |
| 1582 P14 | X | 832    | 840    | -0.08812024 | 912  | 920  | 0.62939594  | 2748405 | -0.95150712 | 2494267 | -0.83485986  | experimental | ChemBridge | 5460896 |
| 1582 P15 | X | 1153   | 1160   | 0.7710463   | 1273 | 1280 | 1.86544586  | 2792152 | -0.87082438 | 2422354 | -0.98738354  | experimental | ChemBridge | 5348814 |
| 1582 P16 | X | 792    | 800    | -0.19518149 | 832  | 840  | 0.3547906   | 1530102 | -3.19842761 | 1534615 | -2.87023119  | experimental | ChemBridge | 5468663 |
| 1582 P17 | X | 712    | 720    | -0.409304   | 831  | 840  | 0.35205051  | 2729412 | -0.98653598 | 2507080 | -0.67257982  | experimental | ChemBridge | 5541959 |
| 1582 P18 | X | 832    | 840    | -0.08812024 | 953  | 960  | 0.76977834  | 2660291 | -1.11401608 | 2593570 | -0.62424343  | experimental | ChemBridge | 5469631 |
| 1582 P19 | X | 991    | 1000   | 0.33744823  | 872  | 880  | 0.4924375   | 2995913 | -0.49502725 | 2546738 | -0.72357163  | experimental | ChemBridge | 5542838 |
| 1582 P20 | X | 1472   | 1480   | 1.62485978  | 1153 | 1160 | 1.45457054  | 2363882 | -1.66068424 | 2116098 | -1.63693638  | experimental | ChemBridge | 5471463 |
| 1582 P21 | X | 829    | 840    | -0.09614984 | 871  | 880  | 0.48901354  | 2642599 | -1.1466455  | 2486607 | -0.85110632  | experimental | ChemBridge | 5546969 |
| 1582 P22 | X | 1148   | 1160   | 0.7576365   | 792  | 800  | 0.21852062  | 2368677 | -1.65184008 | 2103073 | -1.66456172  | experimental | ChemBridge | 5473309 |
| 1582 P23 | N | 1495   | 2240   | 1.68642     | 911  | 920  | 0.62597198  | 2767905 | -0.9155432  | 2129478 | -1.60855811  | empty        |            |         |
| 1582 P24 | P | 254623 | 254640 | 679.191432  | 1635 | 1640 | 3.10491975  | 2279431 | -1.81643751 | 1989307 | -1.90585341  | empty        |            |         |
| 1920 A01 | N | 528    | 560    | -0.18368998 | 518  | 520  | -0.09640999 | 1789261 | -1.98490782 | 1429244 | -2.71555851  | empty        |            |         |
| 1920 A02 | E | 156    | 160    | -2.32291181 | 195  | 200  | -0.25667727 | 782608  | -4.9575342  | 79344   | -7.21121393  | empty        |            |         |
| 1920 A03 | X | 596    | 600    | 0.01852502  | 837  | 840  | 0.06187254  | 2318045 | -0.42341914 | 1739071 | -1.68372249  | experimental | NINDS      | 1500101 |
| 1920 A04 | X | 750    | 760    | 0.86463115  | 674  | 680  | -0.11824207 | 2217362 | -0.72073404 | 1712573 | -1.61877378  | experimental | NINDS      | 1500201 |
| 1920 A05 | X | 596    | 600    | 0.01852502  | 595  | 600  | -0.05820386 | 2447267 | -0.04182913 | 1816174 | -0.24684161  | experimental | NINDS      | 1500102 |
| 1920 A06 | X | 435    | 440    | -0.83290655 | 515  | 520  | -0.09789854 | 2332644 | -0.38030858 | 1485452 | -2.52836553  | experimental | NINDS      | 1500202 |
| 1920 A07 | X | 516    | 520    | -0.40719077 | 474  | 480  | -0.11824207 | 2512146 | 0.14975727  | 1880458 | -1.21285263  | experimental | NINDS      | 1500103 |
| 1920 A08 | X | 555    | 560    | -0.19965432 | 795  | 800  | 0.04103284  | 2105073 | -1.05232124 | 1495883 | -2.49362653  | experimental | NINDS      | 1500205 |
| 1920 A09 | X | 716    | 720    | 0.6570987   | 674  | 680  | -0.01900537 | 3165479 | 0.207903669 | 1824162 | -1.40033868  | experimental | NINDS      | 1500104 |
| 1920 A10 | X | 435    | 440    | -0.838228   | 835  | 840  | 0.06088018  | 2716649 | 0.75365058  | 1833713 | -1.36853039  |              |            |         |

|          |   |        |        |             |        |        |             |          |             |          |             |              |       |         |  |  |  |  |                               |
|----------|---|--------|--------|-------------|--------|--------|-------------|----------|-------------|----------|-------------|--------------|-------|---------|--|--|--|--|-------------------------------|
| 1920 B01 | N | 476    | 480    | -0.62004866 | 557    | 560    | -0.07705884 | 2250340  | -0.62335066 | 2018971  | -0.75155422 | empty        |       |         |  |  |  |  |                               |
| 1920 B02 | E | 197    | 200    | -2.10473247 | 237    | 240    | -0.23583756 | 81547    | -7.02775346 | 91240    | -7.17159595 | empty        |       |         |  |  |  |  |                               |
| 1920 B03 | X | 355    | 360    | -1.26394379 | 274    | 280    | -0.21747877 | 2159217  | -0.89243508 | 2079508  | -0.54994411 | experimental | NINDS | 1500310 |  |  |  |  | Furosemide                    |
| 1920 B04 | X | 440    | 440    | -0.83822828 | 475    | 480    | -0.11774588 | 1780821  | -2.00983097 | 1653669  | -1.96807545 | experimental | NINDS | 1500334 |  |  |  |  | Furozaron                     |
| 1920 B05 | X | 275    | 280    | -1.68965958 | 714    | 720    | 0.00084187  | 201112   | -3.0911535  | 20112    | -3.0911535  | experimental | NINDS | 1500311 |  |  |  |  | Fusidic acid                  |
| 1920 B06 | X | 315    | 320    | -1.47680168 | 513    | 520    | -0.09889091 | 2360554  | -0.2978909  | 2464028  | 0.73064662  | experimental | NINDS | 1500435 |  |  |  |  | Nitromide                     |
| 1920 B07 | X | 395    | 400    | -1.05108589 | 594    | 600    | -0.05870005 | 2290011  | -0.50620298 | 2481621  | 0.78923768  | experimental | NINDS | 1500313 |  |  |  |  | Gemfibrozil                   |
| 1920 B08 | X | 395    | 400    | -1.05108589 | 473    | 480    | -0.11873825 | 2700677  | 0.70648558  | 2005835  | -0.79530185 | experimental | NINDS | 1500436 |  |  |  |  | Norepinephrine                |
| 1920 B09 | X | 474    | 480    | -0.63069155 | 474    | 480    | -0.11824207 | 2430933  | -0.09006311 | 2149330  | -0.31741158 | experimental | NINDS | 1500314 |  |  |  |  | Gentamicin sulfate            |
| 1920 B10 | X | 354    | 360    | -1.26926524 | 472    | 480    | -0.11923443 | 2611069  | 0.44187493  | 2230682  | -0.04647999 | experimental | NINDS | 1500437 |  |  |  |  | Norethindrone                 |
| 1920 B11 | X | 475    | 480    | -0.62537011 | 513    | 520    | -0.09889091 | 1365117  | -3.23739666 | 1245045  | -3.32900782 | experimental | NINDS | 1500315 |  |  |  |  | Gentian violet                |
| 1920 B12 | X | 394    | 400    | -1.06172879 | 392    | 400    | -0.15892911 | 1950753  | -1.50802514 | 215157   | -0.30866272 | experimental | NINDS | 1500438 |  |  |  |  | Norethindrone acetate         |
| 1920 B13 | X | 595    | 600    | 0.01320358  | 713    | 720    | 0.00034579  | 2440027  | -0.06320871 | 1973120  | -0.90425464 | experimental | NINDS | 1500316 |  |  |  |  | Glucosamine hydrochloride     |
| 1920 B14 | X | 394    | 400    | -1.05640734 | 994    | 1000   | 0.13977336  | 2745391  | 0.83852514  | 1951439  | -0.97646021 | experimental | NINDS | 1500439 |  |  |  |  | Nitroglydrol                  |
| 1920 B15 | X | 515    | 520    | -0.41251221 | 433    | 440    | -0.13858559 | 2786157  | 0.95890633  | 2333532  | 0.29604773  | experimental | NINDS | 1500321 |  |  |  |  | Guaiifenesin                  |
| 1920 B16 | X | 474    | 480    | -0.63069155 | 554    | 560    | -0.07854739 | 2385768  | -0.22343446 | 2422916  | 0.59372879  | experimental | NINDS | 1500440 |  |  |  |  | Nitrofurantoin                |
| 1920 B17 | X | 395    | 400    | -1.05108589 | 551    | 560    | -0.08003594 | 1974753  | -1.43715362 | 1872819  | -1.23829326 | experimental | NINDS | 1500322 |  |  |  |  | Guanabenz acetate             |
| 1920 B18 | X | 433    | 440    | -0.8488709  | 553    | 560    | -0.07904357 | 2413068  | -0.1428181  | 2306312  | 0.20539528  | experimental | NINDS | 1500441 |  |  |  |  | Norgestrel                    |
| 1920 B19 | X | 513    | 520    | -0.42315511 | 794    | 800    | 0.04053665  | 2182182  | -0.82461989 | 2267525  | 0.07622053  | experimental | NINDS | 1500323 |  |  |  |  | Guanethidine sulfate          |
| 1920 B20 | X | 393    | 400    | -1.06172879 | 592    | 600    | -0.05969241 | 2133534  | -0.96827647 | 2086572  | -0.52641843 | experimental | NINDS | 1500442 |  |  |  |  | Nortriptyline                 |
| 1920 B21 | X | 514    | 520    | -0.41783366 | 512    | 520    | -0.09938709 | 1954393  | -1.49727629 | 2134517  | -0.36674423 | experimental | NINDS | 1500324 |  |  |  |  | Halazone                      |
| 1920 B22 | X | 672    | 680    | 0.42295502  | 787    | 800    | 0.03706337  | 2041858  | -1.23899388 | 1930675  | -1.04561185 | experimental | NINDS | 1500443 |  |  |  |  | Noscapine hydrochloride       |
| 1920 B23 | E | 507    | 960    | -0.45508379 | 726    | 1520   | 0.00679618  | 90023    | -7.002724   | 90185    | -7.17510948 | empty        |       |         |  |  |  |  |                               |
| 1920 B24 | P | 151712 | 153040 | 804.174363  | 268418 | 270040 | 132.831151  | 1978689  | -1.42553069 | 1765534  | -1.59559113 | empty        |       |         |  |  |  |  |                               |
| 1920 C01 | N | 477    | 480    | -0.61472721 | 436    | 440    | -0.13709704 | 3086965  | -1.8471864  | 1976170  | -0.89409704 | empty        |       |         |  |  |  |  |                               |
| 1920 C02 | E | 156    | 200    | -2.01602842 | 156    | 190    | -0.17774588 | 1033300  | -6.96283809 | 858368   | -7.18742147 | empty        |       |         |  |  |  |  |                               |
| 1920 C03 | X | 436    | 440    | -0.83299655 | 477    | 480    | -0.11675352 | 2940799  | -0.1455611  | 22874567 | 44.256467   | experimental | NINDS | 1500112 |  |  |  |  | Amiloride hydrochloride       |
| 1920 C04 | X | 395    | 400    | -1.05108589 | 394    | 400    | -0.15793675 | 2571412  | 0.3247686   | 2066227  | -0.59417464 | experimental | NINDS | 1500213 |  |  |  |  | Cyclophosphamide hydrate      |
| 1920 C05 | X | 435    | 440    | -0.838228   | 473    | 480    | -0.11873825 | 2920234  | 1.35483306  | 2491262  | 0.8213457   | experimental | NINDS | 1500113 |  |  |  |  | Potassium p-aminobenzoate     |
| 1920 C06 | X | 555    | 560    | -0.19965432 | 474    | 480    | -0.11824207 | 2449655  | -0.03477741 | 2205111  | -0.13164067 | experimental | NINDS | 1500215 |  |  |  |  | Cycloperine                   |
| 1920 C07 | X | 395    | 400    | -1.05108589 | 474    | 480    | -0.11824207 | 3009375  | 1.61806467  | 2312564  | 0.2262167   | experimental | NINDS | 1500114 |  |  |  |  | 6-aminocaproic acid           |
| 1920 C08 | X | 315    | 320    | -1.47680168 | 475    | 480    | -0.11774588 | 2731654  | 0.79796005  | 2389149  | 0.48127246  | experimental | NINDS | 1500216 |  |  |  |  | Cyproterone acetate           |
| 1920 C09 | X | 594    | 600    | 0.00788213  | 393    | 400    | -0.15843293 | 2715931  | 0.75153034  | 2152256  | -0.30766694 | experimental | NINDS | 1500115 |  |  |  |  | Aminoglutethimide             |
| 1920 C10 | X | 634    | 640    | 0.22074002  | 595    | 600    | -0.02069897 | 20206893 | -0.9617508  | 2675525  | 0.07622053  | experimental | NINDS | 1500217 |  |  |  |  | Cyramine                      |
| 1920 C11 | X | 394    | 400    | -1.05640734 | 393    | 400    | -0.02019313 | 2839950  | 1.117756    | 2148107  | -0.32148462 | experimental | NINDS | 1500116 |  |  |  |  | Aminosalicylate sodium        |
| 1920 C12 | X | 595    | 600    | 0.01320358  | 674    | 680    | -0.01900537 | 2525894  | 0.19035484  | 2155920  | -0.2954645  | experimental | NINDS | 1500220 |  |  |  |  | Danzol                        |
| 1920 C13 | X | 313    | 320    | -1.48744458 | 473    | 480    | -0.11873825 | 2274883  | -0.55087567 | 2183097  | -0.20495526 | experimental | NINDS | 1500117 |  |  |  |  | Amtriptyline hydrochloride    |
| 1920 C14 | X | 635    | 640    | 0.22606147  | 554    | 560    | -0.07854739 | 2691956  | 0.68073264  | 2135565  | -0.36325401 | experimental | NINDS | 1500222 |  |  |  |  | Dapsone                       |
| 1920 C15 | X | 433    | 440    | -0.8488709  | 250    | 360    | -0.22938717 | 1986542  | -1.40234093 | 1683066  | -1.87023941 | experimental | NINDS | 1500119 |  |  |  |  | Amodiaquine dihydrochloride   |
| 1920 C16 | X | 633    | 640    | 0.21541857  | 433    | 440    | -0.13858559 | 2781844  | 0.94617013  | 2265997  | 0.07113174  | experimental | NINDS | 1500224 |  |  |  |  | Deferoxamine mesylate         |
| 1920 C17 | X | 713    | 720    | 0.00345782  | 713    | 720    | 0.00345782  | 2814588  | 1.0415781   | 2814588  | 1.0415781   | experimental | NINDS | 1500225 |  |  |  |  | Amoxicillin                   |
| 1920 C18 | X | 914    | 920    | -0.074528   | 673    | 680    | -0.01950155 | 2983994  | 1.5311508   | 2165650  | -0.29303333 | experimental | NINDS | 1500225 |  |  |  |  | Sodium hydrochloride          |
| 1920 C19 | X | 751    | 760    | 0.84334936  | 512    | 520    | -0.09938709 | 2788527  | 0.96590489  | 2296458  | 0.17257789  | experimental | NINDS | 1500122 |  |  |  |  | Amphotericin B                |
| 1920 C20 | X | 954    | 960    | 1.92260317  | 552    | 560    | -0.07953975 | 2310941  | -0.44439711 | 2821868  | -0.05485252 | experimental | NINDS | 1500226 |  |  |  |  | Methoclopramide hydrochloride |
| 1920 C21 | X | 512    | 520    | -0.42847655 | 872    | 880    | 0.07923897  | 2801252  | 1.00348157  | 2216028  | -0.09528311 | experimental | NINDS | 1500123 |  |  |  |  | Ampicillin sodium             |
| 1920 C22 | X | 671    | 680    | 0.41763357  | 1109   | 1120   | 0.19683446  | 1957615  | -1.48776179 | 1859743  | -1.28184107 | experimental | NINDS | 1500227 |  |  |  |  | Desipramine hydrochloride     |
| 1920 C23 | E | 632    | 1280   | 0.21009713  | 803    | 1400   | 0.04500231  | 91740    | -6.99765373 | 93236    | -7.16494854 | empty        |       |         |  |  |  |  |                               |
| 1920 C24 | P | 20054  | 221000 | 1167.852272 | 201990 | 203960 | 99.424108   | 2039650  | -1.96976558 | 2109355  | -0.41716924 | empty        |       |         |  |  |  |  |                               |
| 1920 D01 | N | 236    | 240    | -0.89719602 | 637    | 640    | -0.03736416 | 2208303  | -0.74453211 | 2073712  | -0.56924668 | empty        |       |         |  |  |  |  |                               |
| 1920 D02 | E | 237    | 240    | -1.89187458 | 196    | 200    | -0.25618108 | 83676    | -7.02146656 | 90804    | -7.17304798 | empty        |       |         |  |  |  |  |                               |
| 1920 D03 | X | 396    | 400    | -1.04576445 | 354    | 360    | -0.17774588 | 2319861  | -0.41805653 | 2010004  | -0.78141757 | experimental | NINDS | 1500325 |  |  |  |  | Haloperidol                   |
| 1920 D04 | X | 274    | 280    | -1.69498102 | 554    | 560    | -0.07854739 | 2473796  | 0.03651048  | 2316847  | 0.24048064  | experimental | NINDS | 1500444 |  |  |  |  | Novobocin sodium              |
| 1920 D05 | X | 596    | 600    | 0.01852502  | 754    | 760    | 0.02068931  | 2478342  | 0.04993473  | 2131142  | -0.37798472 | experimental | NINDS | 1500327 |  |  |  |  | Hetacillin potassium          |
| 1920 D06 | X | 434    | 440    | -0.84354945 | 474    | 480    | -0.11824207 | 2708381  | 0.72923534  | 2357549  | 0.37603303  | experimental | NINDS | 1500445 |  |  |  |  | Nylidrin hydrochloride        |
| 1920 D07 | X | 395    | 400    | -1.05108589 | 395    | 400    | -0.15744056 | 1689454  | -2.27963592 | 1606133  | -2.12645413 | experimental | NINDS | 1500328 |  |  |  |  | Hexachlorophene               |
| 1920 D08 | X | 435    | 440    | -0.838228   | 394    | 400    | -0.15793675 | 2798775  | 0.99618704  | 2367548  | 0.40933331  | experimental | NINDS | 1500446 |  |  |  |  | Wystiantin                    |
| 1920 D09 | X | 634    | 640    | 0.22074002  | 635    | 640    | -0.03835652 | 2563029  | 0.30001376  | 2561674  | 1.05584313  | experimental | NINDS | 1500330 |  |  |  |  | Hexylresorcinol               |
| 1920 D10 | X | 594    | 600    | 0.00788213  | 593    | 600    | -0.05919623 | 2784067  | 0.9527346   | 2150139  | -0.31471732 | experimental | NINDS | 1500447 |  |  |  |  | Orphenadrine citrate          |
| 1920 D11 | X | 274    | 280    | -1.69498102 | 473    | 480    | -0.11873825 | 2771479  | 0.91556249  | 2755425  | 1.10163894  | experimental | NINDS | 1500331 |  |  |  |  | Histamine dihydrochloride     |
| 1920 D12 | X | 635    | 640    | 0.22606147  | 473    | 480    | -0.11873825 | 2853226  | 1.15695976  | 2684942  | 1.46637017  | experimental | NINDS | 1500448 |  |  |  |  | Oxacillin sodium              |
| 1920 D13 | X | 514    | 520    | -0.41783366 | 595    | 600    | -0.05820386 | 2509406  | 0.14166611  | 2300522  | 0.18611248  | experimental | NINDS | 1500332 |  |  |  |  | Homatropine bromide           |
| 1920 D14 | X | 634    | 640    | 0.22074002  | 289    | 400    | -0.21003602 | 2299843  | -0.47716928 | 2381914  | 0.45717229  | experimental | NINDS | 1500450 |  |  |  |  | Oxidopamine hydrochloride     |
| 1920 D15 | X | 592    | 600    | 0.00276977  | 36514  | 36520  | 17.7642115  | 2992799  | 1.56911607  | 2470737  | 0.75299002  | experimental | NINDS | 1500333 |  |  |  |  | Homatropine methylbromide     |
| 1920 D16 | X | 1033   | 1040   | 0.24399751  | 530    | 640    | -0.09045579 | 2846710  | 1.13771814  | 2382565  | 0.45934936  | experimental | NINDS | 1500451 |  |  |  |  | Oxybenzone                    |
| 1920 D17 | X | 713    | 720    | 0.04113436  | 632    | 640    | -0.03984507 | 2559861  | 0.29065872  | 1945088  | -0.99761134 | experimental | NINDS | 1500334 |  |  |  |  | Hydralazine hydrochloride     |
| 1920 D18 | X | 511    | 520    | -0.433798   | 752    | 760    | 0.01969695  | 2424759  | -0.10829481 | 2257934  | 0.04427903  | experimental | NINDS | 1500453 |  |  |  |  | Oxymetazoline hydrochloride   |
| 1920 D19 | X | 674    | 680    | 0.43359792  | 752</  |        |             |          |             |          |             |              |       |         |  |  |  |  |                               |

|          |   |        |        |             |        |        |             |         |             |         |             |              |       |         |                               |
|----------|---|--------|--------|-------------|--------|--------|-------------|---------|-------------|---------|-------------|--------------|-------|---------|-------------------------------|
| 1920 E19 | X | 512    | 520    | -0.42847655 | 711    | 720    | -0.00064658 | 2627722 | 0.49105091  | 2408107 | 0.54440946  | experimental | NINDS | 1500134 | Bacitracin                    |
| 1920 E20 | X | 593    | 600    | 0.00256068  | 792    | 800    | 0.03954429  | 2321976 | -0.41181097 | 2571694 | 1.08921336  | experimental | NINDS | 1500239 | Dicumarol                     |
| 1920 E21 | X | 714    | 720    | 0.64645581  | 752    | 760    | 0.01969695  | 2817290 | 1.05084146  | 2410009 | 0.55074381  | experimental | NINDS | 1500135 | Baclofen                      |
| 1920 E22 | X | 640    | 640    | 0.20477568  | 591    | 600    | -0.06018886 | 2670079 | 0.61613003  | 2949785 | 0.01713991  | experimental | NINDS | 1500240 | Dicyclomine hydrochloride     |
| 1920 E23 | X | 531    | 1040   | -0.32736906 | 620    | 1120   | -0.04529928 | 93137   | -6.9912842  | 93137   | -7.1712398  | empty        |       |         |                               |
| 1920 E24 | P | 171844 | 172920 | 911.305741  | 168941 | 170040 | 83.4723045  | 2529149 | 0.1999668   | 2313334 | 0.22878108  | empty        |       |         |                               |
| 1920 F01 | N | 437    | 440    | -0.82758511 | 557    | 560    | -0.07705884 | 2725051 | 0.77846152  | 2646392 | 1.33798472  | experimental | NINDS | 1500339 | Hydrocortisone hemisuccinate  |
| 1920 F02 | E | 156    | 160    | -2.32291181 | 235    | 240    | -0.23682993 | 83864   | -7.02091114 | 88834   | -7.17960888 | empty        |       |         |                               |
| 1920 F03 | X | 755    | 760    | 0.86463515  | 754    | 760    | 0.02068931  | 2166358 | -0.87134785 | 2057638 | -0.62277912 | experimental | NINDS | 1500339 | Hydrocortisone hemisuccinate  |
| 1920 F04 | X | 433    | 440    | -0.8488709  | 513    | 520    | -0.09889091 | 2635064 | 0.51273169  | 2582742 | 1.12600719  | experimental | NINDS | 1500457 | Oxytetracycline               |
| 1920 F05 | X | 634    | 640    | 0.22074002  | 354    | 360    | -0.17784009 | 2303561 | -0.4661901  | 2117403 | -0.42374005 | experimental | NINDS | 1500341 | Hydroflumethiazide            |
| 1920 F06 | X | 634    | 640    | 0.22074002  | 474    | 480    | -0.11824207 | 2258245 | -0.80000735 | 195849  | -0.96114055 | experimental | NINDS | 1500459 | Paspaverine hydrochloride     |
| 1920 F07 | X | 475    | 480    | -0.62537011 | 634    | 640    | -0.03885271 | 1785466 | -1.99611438 | 1652016 | -1.97364714 | experimental | NINDS | 1500343 | Hydroxyprogesterone caproate  |
| 1920 F08 | X | 434    | 440    | -0.84354945 | 555    | 560    | -0.0780512  | 3011168 | 1.62335936  | 2311007 | 0.22103133  | experimental | NINDS | 1500460 | Parachlorophenol              |
| 1920 F09 | X | 433    | 440    | -0.8488709  | 514    | 520    | -0.09839473 | 2563243 | 0.3006457   | 2380346 | 0.45195528  | experimental | NINDS | 1500344 | Hydroxyurea                   |
| 1920 F10 | X | 593    | 600    | 0.00256068  | 433    | 440    | -0.13858559 | 2718957 | 0.76046606  | 2465728 | 0.73630824  | experimental | NINDS | 1500464 | Penicillamine                 |
| 1920 F11 | X | 594    | 600    | 0.00788213  | 314    | 320    | -0.09839473 | 2666366 | 0.60516588  | 2115924 | -0.42866565 | experimental | NINDS | 1500345 | Hydroxyzine pamoate           |
| 1920 F12 | X | 595    | 600    | 0.01320358  | 594    | 600    | -0.15793675 | 2537535 | 0.22473049  | 2435849 | 0.63880036  | experimental | NINDS | 1500465 | Benzyd penicillin potassium   |
| 1920 F13 | X | 354    | 360    | -1.26926524 | 354    | 360    | -0.17778409 | 2400413 | -0.18018806 | 2217028 | -0.09195275 | experimental | NINDS | 1500346 | Hycoscyamine                  |
| 1920 F14 | X | 515    | 520    | -0.41251221 | 674    | 680    | -0.01900537 | 2582084 | 0.3562888   | 2405122 | 0.53446833  | experimental | NINDS | 1500467 | Penicillin v potassium        |
| 1920 F15 | X | 434    | 440    | -0.84354945 | 393    | 400    | -0.15843293 | 2436875 | -0.0725165  | 2332593 | 0.29292052  | experimental | NINDS | 1500347 | Ibuprofen                     |
| 1920 F16 | X | 434    | 440    | -0.84354945 | 594    | 600    | -0.05870005 | 2630674 | 0.49976811  | 2708671 | 1.54539633  | experimental | NINDS | 1500472 | Phenacetamide                 |
| 1920 F17 | X | 512    | 520    | -0.42847655 | 430    | 440    | -0.14007414 | 2142972 | -0.94040624 | 2024077 | -0.73454939 | experimental | NINDS | 1500348 | Imipramine hydrochloride      |
| 1920 F18 | X | 1313   | 1320   | 0.83400277  | 1392   | 1400   | 0.33725459  | 2354174 | -0.31673092 | 2498273 | 0.84619352  | experimental | NINDS | 1500473 | Phenazopyridine hydrochloride |
| 1920 F19 | X | 710    | 720    | 0.62517002  | 750    | 760    | 0.01870458  | 2299134 | -0.47926295 | 2308551 | 0.21285196  | experimental | NINDS | 1500349 | Indapamide                    |
| 1920 F20 | X | 673    | 680    | 0.42827647  | 551    | 560    | -0.00033594 | 3526075 | 1.62249414  | 1609127 | 2.11743399  | experimental | NINDS | 1500474 | Phenindolol                   |
| 1920 F21 | X | 472    | 480    | -0.61333445 | 792    | 800    | 0.03954429  | 2363736 | -0.09048452 | 2264640 | -0.22880017 | experimental | NINDS | 1500350 | Indomethacin                  |
| 1920 F22 | X | 711    | 720    | 0.63049147  | 631    | 640    | -0.04034126 | 2267069 | -0.57395026 | 2421661 | 0.58954918  | experimental | NINDS | 1500478 | Pheniramine maleate           |
| 1920 F23 | E | 538    | 1120   | -0.29011892 | 541    | 1040   | -0.08499777 | 83869   | -7.00760822 | 91168   | -7.17183753 | empty        |       |         |                               |
| 1920 F24 | P | 197215 | 198200 | 1046.31618  | 168729 | 169640 | 83.3671136  | 2210456 | -0.74112732 | 2013741 | -0.76897201 | empty        |       |         |                               |
| 1920 G01 | N | 397    | 400    | -1.040443   | 397    | 400    | -0.1564482  | 3053523 | 1.74843284  | 1967589 | -0.92267487 | empty        |       |         |                               |
| 1920 G02 | E | 156    | 160    | -2.32291181 | 156    | 160    | -0.27602842 | 108397  | -6.94846594 | 87835   | -7.18293583 | empty        |       |         |                               |
| 1920 G03 | X | 633    | 640    | 0.21541857  | 593    | 600    | -0.05919623 | 3158791 | 2.05928716  | 2347502 | 0.34257288  | experimental | NINDS | 1500136 | Beclomethasone dipropionate   |
| 1920 G04 | X | 440    | 440    | 0.84354945  | 594    | 600    | -0.05870005 | 2630674 | 0.49976811  | 2708671 | 1.54539633  | experimental | NINDS | 1500241 | Difenestrol                   |
| 1920 G05 | X | 674    | 680    | 0.43359792  | 674    | 680    | -0.01900537 | 3165284 | 2.07846086  | 2706508 | 1.53819276  | experimental | NINDS | 1500137 | Benserazide hydrochloride     |
| 1920 G06 | X | 593    | 600    | 0.00256068  | 634    | 640    | -0.03885271 | 2745866 | 0.83992781  | 2492259 | 0.82466607  | experimental | NINDS | 1500242 | Diethylcarbamazine citrate    |
| 1920 G07 | X | 474    | 480    | -0.63069155 | 554    | 560    | -0.07854739 | 2663701 | 0.59729619  | 2331717 | 0.29000312  | experimental | NINDS | 1500138 | Benzethonium chloride         |
| 1920 G08 | X | 594    | 600    | 0.00788213  | 154    | 160    | -0.27702079 | 2796131 | 0.98835936  | 2421868 | -2.74012326 | experimental | NINDS | 1500244 | Diethylstilbestrol            |
| 1920 G09 | X | 633    | 640    | 0.21541857  | 713    | 720    | 0.00034579  | 2712166 | 0.74041237  | 1197651 | -0.15648517 | experimental | NINDS | 1500139 | Benzocaine                    |
| 1920 G10 | X | 834    | 840    | 1.28502949  | 873    | 880    | 0.07973515  | 2526278 | 0.19148879  | 2523600 | 0.92904294  | experimental | NINDS | 1500245 | Diffusal                      |
| 1920 G11 | X | 463    | 460    | -0.03478289 | 474    | 480    | -0.11824207 | 2258245 | -0.80000735 | 195849  | -0.96114055 | experimental | NINDS | 1500141 | Benzisazide                   |
| 1920 G12 | X | 474    | 480    | -0.63069155 | 474    | 480    | -0.11824207 | 1929200 | 1.857165891 | 1951669 | -0.97569423 | experimental | NINDS | 1500246 | Digoxin                       |
| 1920 G13 | X | 555    | 560    | -0.19965432 | 554    | 560    | -0.07854739 | 2449725 | -0.0345707  | 1928278 | -0.15439703 | experimental | NINDS | 1500142 | Benzotropine                  |
| 1920 G14 | X | 473    | 480    | -0.636013   | 513    | 520    | -0.09889091 | 1869479 | -1.74802566 | 1784144 | -1.53361131 | experimental | NINDS | 1500247 | Digoxin                       |
| 1920 G15 | X | 594    | 600    | 0.00788213  | 673    | 680    | -0.01901555 | 2910471 | 1.32600311  | 2432998 | 0.62730549  | experimental | NINDS | 1500144 | Betamethasone                 |
| 1920 G16 | X | 433    | 440    | -0.8488709  | 833    | 840    | 0.05988781  | 2360329 | -0.29855532 | 2313767 | 0.23022312  | experimental | NINDS | 1500248 | Dihydroergotamine mesylate    |
| 1920 G17 | X | 714    | 720    | 0.64645581  | 752    | 760    | 0.01969695  | 3184332 | 2.13470922  | 2550536 | 1.01874956  | experimental | NINDS | 1500145 | Betamethasone valerate        |
| 1920 G18 | X | 588    | 590    | 0.02404656  | 868    | 880    | 0.07725423  | 2926261 | 1.37853663  | 2670242 | 1.41741389  | experimental | NINDS | 1500249 | Bithionol                     |
| 1920 G19 | X | 1032   | 1040   | -0.33867607 | 791    | 800    | 0.03904829  | 2827409 | 1.08522626  | 2827409 | 1.08522626  | experimental | NINDS | 1500250 | Benzocaine chloride           |
| 1920 G20 | X | 751    | 760    | 0.84334936  | 832    | 840    | 0.05939163  | 2344970 | -0.34391015 | 2314184 | 0.23161188  | experimental | NINDS | 1500251 | Dimenhydrinate                |
| 1920 G21 | X | 631    | 640    | 0.20477568  | 756    | 760    | 0.01920076  | 2848541 | 1.14312505  | 2273608 | 0.09647912  | experimental | NINDS | 1500147 | Bisacodyl                     |
| 1920 G22 | X | 790    | 800    | 1.05088581  | 790    | 800    | 0.03855192  | 2494431 | 0.09744523  | 2232531 | -0.04032215 | experimental | NINDS | 1500253 | Dimethadione                  |
| 1920 G23 | E | 709    | 1200   | 0.61984857  | 535    | 960    | -0.08797487 | 89213   | -7.00511591 | 91176   | -7.17180909 | empty        |       |         |                               |
| 1920 G24 | P | 165139 | 166240 | 875.625436  | 142691 | 143720 | 70.4474875  | 2319803 | -0.4182278  | 2221213 | -0.07801518 | empty        |       |         |                               |
| 1920 H01 | N | 597    | 600    | 0.02384647  | 357    | 360    | -0.17629554 | 2676813 | 0.63601566  | 2257841 | 0.39039331  | empty        |       |         |                               |
| 1920 H02 | E | 234    | 240    | -1.90783892 | 156    | 160    | -0.27602842 | 82577   | -7.02471189 | 88521   | -7.1806512  | empty        |       |         |                               |
| 1920 H03 | X | 914    | 920    | 1.71074528  | 835    | 840    | 0.06088018  | 2472234 | 0.03189793  | 2101426 | -0.47694924 | experimental | NINDS | 1500351 | Indoprofen                    |
| 1920 H04 | X | 353    | 360    | -1.27458668 | 393    | 400    | -0.15843293 | 2525945 | 0.19050545  | 2293629 | 0.1631563   | experimental | NINDS | 1500480 | Phenolphthalein               |
| 1920 H05 | X | 514    | 520    | -0.41783366 | 394    | 400    | -0.15793675 | 2340485 | -0.35715426 | 2107159 | -0.45785627 | experimental | NINDS | 1500353 | Iodoquinol                    |
| 1920 H06 | X | 514    | 520    | -0.41783366 | 513    | 520    | -0.09889091 | 2773113 | 0.92038766  | 2680170 | 1.45047769  | experimental | NINDS | 1500482 | Phenylbutazone                |
| 1920 H07 | X | 394    | 400    | -1.05640734 | 394    | 400    | -0.07854739 | 2303312 | -0.4669254  | 2387980 | 0.47737927  | experimental | NINDS | 1500354 | Ipratropium bromide           |
| 1920 H08 | X | 514    | 520    | -0.41783366 | 555    | 560    | -0.15744056 | 2664992 | 0.60110848  | 2608124 | 1.21053844  | experimental | NINDS | 1500483 | Phenylephrine hydrochloride   |
| 1920 H09 | X | 554    | 560    | -0.20497577 | 714    | 720    | 0.00084197  | 2560724 | 0.29320714  | 2348971 | 0.34745518  | experimental | NINDS | 1500355 | Isoniazid                     |
| 1920 H10 | X | 473    | 480    | -0.636013   | 592    | 600    | -0.05969241 | 2959286 | 0.39526805  | 2417689 | 0.57632099  | experimental | NINDS | 1500485 | Phenytion sodium              |
| 1920 H11 | X | 395    | 400    | -1.05108589 | 554    | 560    | -0.07854739 | 2423586 | -0.11175865 | 2409703 | 0.54972472  | experimental | NINDS | 1500356 | Isopropamide iodide           |
| 1920 H12 | X | 475    | 480    | -0.62537011 | 473    | 480    | -0.11873825 | 2468959 | 0.02222692  | 2403804 | 0.53007891  | experimental | NINDS | 1500486 | Phyostigmine salicylate       |
| 1920 H13 | X | 553    | 560    | -2.1029721  | 555    | 560    | -0.0780512  | 2344150 | -0.34633159 | 2292805 | 0.16041208  | experimental | NINDS | 1500357 | Isoproterenol hydrochloride   |
| 1920 H14 | X | 794    | 800    | 1.0721716   | 373    | 380    | -0.17828027 | 2761086 | 0.88487216  | 2496844 | 0.83993578  | experimental | NINDS | 1500487 | Pilocarpine nitrate           |
| 1920 H15 | X | 633    | 640    | 0.21541857  | 674    | 680    | -0.01900537 | 2431677 | -0.08786609 | 2309405 | 0.21259609  | experimental | NINDS | 1500358 | Isonorbide dinitrate          |
| 1920 H16 | X | 434    | 440    | 0.00788213  | 472    | 480    | -0.11824207 | 2713452 | 0.74420991  | 2635940 | 1.12899967  | experimental | NINDS | 1500488 | Indinavir                     |
| 1920 H17 | X | 431    | 440    | -0.85951379 | 511    | 520    | -0.09888328 | 2680696 | 0.64782079  | 2533396 | 0.29206463  | experimental | NINDS | 1500359 | Isosuxrine hydrochloride      |
| 1920 H18 | X | 993    | 1000   | 2.13113962  | 1153   | 1160   | 0.21866653  | 2566596 | 0.31054704  | 2410718 | 0.55310503  | experimental | NINDS | 1500489 | Piperacillin sodium           |
| 1920 H19 | X | 669    | 680    | 0.40699068  | 471    | 48     |             |         |             |         |             |              |       |         |                               |

|          |   |        |        |             |        |        |             |         |               |         |               |              |       |         |                                       |
|----------|---|--------|--------|-------------|--------|--------|-------------|---------|---------------|---------|---------------|--------------|-------|---------|---------------------------------------|
| 1920 I13 | X | 434    | 440    | -0.84354945 | 433    | 440    | -0.13858559 | 2502125 | 0.12016546    | 2352078 | 0.35781262    | experimental | NINDS | 1500157 | Capreomycin sulfate                   |
| 1920 I14 | X | 514    | 520    | -0.41783366 | 714    | 720    | 0.00084197  | 2868259 | 1.20135191    | 2224496 | -0.06708161   | experimental | NINDS | 1500261 | Disopyramide phosphate                |
| 1920 I15 | X | 433    | 440    | -0.8488709  | 472    | 480    | -0.11923443 | 2702430 | 0.71166216    | 2428260 | 0.61252535    | experimental | NINDS | 1500158 | Carbachol                             |
| 1920 I16 | X | 673    | 680    | -0.42827647 | 593    | 600    | 0.00345799  | 2454655 | -0.02001251   | 3022662 | 0.19330666    | experimental | NINDS | 1500262 | Disulfiram                            |
| 1920 I17 | X | 673    | 680    | -0.42827647 | 493    | 600    | -0.05919623 | 2707833 | 0.72761711    | 2500258 | 2.43500258    | experimental | NINDS | 1500159 | Carbamazepine                         |
| 1920 I18 | X | 711    | 720    | 0.63049147  | 512    | 520    | -0.09938709 | 2555052 | 0.27645784    | 2551173 | 1.03419245    | experimental | NINDS | 1500263 | Dopamine hydrochloride                |
| 1920 I19 | X | 872    | 880    | 1.48724449  | 594    | 600    | -0.05870005 | 3149056 | 2.03053989    | 2558918 | 1.04666465    | experimental | NINDS | 1500160 | Carbenicillin disodium                |
| 1920 I20 | X | 671    | 680    | 0.41763357  | 712    | 720    | -0.00015039 | 2807706 | 1.0225401     | 2376279 | 0.4384107     | experimental | NINDS | 1500266 | Doxycycline hydrochloride             |
| 1920 I21 | X | 591    | 600    | -0.00808221 | 952    | 960    | 0.11893365  | 2488740 | 0.08063982    | 2360999 | 0.38752227    | experimental | NINDS | 1500161 | Carbinoxamine maleate                 |
| 1920 I22 | X | 790    | 800    | 1.05088581  | 788    | 800    | 0.03755955  | 2221083 | -0.709746     | 2086249 | -0.52749414   | experimental | NINDS | 1500264 | Doxepin hydrochloride                 |
| 1920 I23 | E | 795    | 1360   | 1.07749304  | 650    | 1120   | -0.03091377 | 88374   | -7.00759346   | 93205   | -7.17504287   | empty        |       |         |                                       |
| 1920 I24 | P | 190571 | 191640 | 101746049   | 158358 | 159440 | 78.2211945  | 2528098 | 0.19686321    | 2329207 | 0.633272976   | empty        |       |         |                                       |
| 1920 J01 | N | 557    | 560    | -0.18901142 | 397    | 400    | -0.1564482  | 2212725 | -0.72099095   | 2309001 | 0.21435062    | empty        |       |         |                                       |
| 1920 J02 | E | 236    | 240    | -1.89719602 | 196    | 200    | -0.25618108 | 84633   | -7.01864056   | 90352   | -7.1745531    | empty        |       |         |                                       |
| 1920 J03 | X | 314    | 320    | -1.48212313 | 635    | 640    | -0.03835652 | 2232291 | -0.676649     | 2127571 | -0.38987693   | experimental | NINDS | 1500363 | Lactulose                             |
| 1920 J04 | X | 554    | 560    | -0.20497577 | 394    | 400    | -0.15793675 | 2286468 | -0.51666539   | 2351081 | 0.35449224    | experimental | NINDS | 1500492 | Polymyxin b sulfate                   |
| 1920 J05 | X | 473    | 480    | -0.636013   | 515    | 520    | -0.09789854 | 2502773 | 0.12207899    | 2207214 | -0.12463692   | experimental | NINDS | 1500364 | Leucovorin calcium                    |
| 1920 J06 | X | 674    | 680    | 0.43359792  | 474    | 480    | -0.11824207 | 2761067 | 0.88481606    | 2543656 | 0.99583667    | experimental | NINDS | 1500494 | Praziquantel                          |
| 1920 J07 | X | 674    | 680    | 0.43359792  | 393    | 400    | -0.15843293 | 2742117 | 0.82885708    | 2330280 | 0.28521739    | experimental | NINDS | 1500365 | Levonordesrin                         |
| 1920 J08 | X | 673    | 680    | 0.42827647  | 994    | 1000   | 0.13977336  | 2638851 | 0.52391463    | 2749948 | 1.68286367    | experimental | NINDS | 1500476 | Phenelzine sulfate                    |
| 1920 J09 | X | 513    | 520    | -0.42315511 | 473    | 480    | -0.11873825 | 2683524 | 0.65583311    | 2426203 | 0.60467569    | experimental | NINDS | 1500368 | Lincomycin hydrochloride              |
| 1920 J10 | X | 674    | 680    | 0.43359792  | 594    | 600    | -0.05870005 | 2903280 | 1.30476823    | 2702987 | 1.52646655    | experimental | NINDS | 1500495 | Prazosin hydrochloride                |
| 1920 J11 | X | 432    | 440    | -0.85419234 | 713    | 720    | 0.00034579  | 2589520 | 0.37824116    | 2263081 | 0.0614204     | experimental | NINDS | 1500372 | Mafenide hydrochloride                |
| 1920 J12 | X | 1114   | 1120   | 2.77503475  | 992    | 1000   | 0.13878899  | 2841877 | 1.12344639    | 2534214 | 0.9643914     | experimental | NINDS | 1500496 | Propolisolone                         |
| 1920 J13 | X | 393    | 400    | -1.06172879 | 472    | 480    | -0.11923443 | 2077467 | -1.13384121   | 2351421 | 0.35562457    | experimental | NINDS | 1500373 | Maprotiline hydrochloride             |
| 1920 J14 | X | 434    | 440    | -0.84354945 | 515    | 520    | -0.09540685 | 2639860 | 0.52689019    | 2128908 | 1.66241525    | experimental | NINDS | 1500497 | Propolisolone acetate                 |
| 1920 J15 | X | 674    | 680    | 0.43359792  | 753    | 760    | 0.02019311  | 2515028 | -2.7961244    | 1515205 | -4.29277277   | experimental | NINDS | 1500375 | Mechlorethamine                       |
| 1920 J16 | X | 673    | 680    | 0.42827647  | 792    | 800    | 0.03954429  | 2662113 | 0.59260685    | 2835105 | 1.9664673     | experimental | NINDS | 1500499 | Prednisone                            |
| 1920 J17 | X | 552    | 560    | -0.21561866 | 513    | 520    | -0.09889091 | 2325975 | -0.400002     | 2352375 | 0.35880173    | experimental | NINDS | 1500376 | Mecizline hydrochloride               |
| 1920 J18 | X | 671    | 680    | 0.41763357  | 513    | 520    | -0.09889091 | 2426907 | -0.10195181   | 2677747 | 1.44240822    | experimental | NINDS | 1500500 | Primaquine diphosphate                |
| 1920 J19 | X | 832    | 840    | 1.2743866   | 613    | 520    | -0.09889091 | 2355834 | -0.31182897   | 2335074 | 0.30118314    | experimental | NINDS | 1500379 | Metroxprogesterone acetate            |
| 1920 J20 | X | 711    | 720    | 0.63049147  | 571    | 680    | -0.02049392 | 2641120 | 0.53061494    | 2537800 | 0.97633407    | experimental | NINDS | 1500501 | Primidone                             |
| 1920 J21 | X | 712    | 720    | 0.63581291  | 751    | 760    | 0.01920076  | 2407426 | -0.15947881   | 2345678 | 0.3364983     | experimental | NINDS | 1500380 | Medrysone                             |
| 1920 J22 | E | 720    | 600    | 0.13430366  | 871    | 880    | -0.01340366 | 2422167 | 0.11594837    | 2119317 | 0.10487873    | experimental | NINDS | 1500502 | Probenecid                            |
| 1920 J23 | E | 728    | 1280   | 0.72095607  | 447    | 1000   | -0.13163902 | 87980   | -7.00875693   | 92525   | -7.16731643   | empty        |       |         |                                       |
| 1920 J24 | P | 186258 | 187320 | 988.009083  | 187151 | 188080 | 92.5078062  | 2188954 | -0.80462231   | 2151993 | -0.30854283   | empty        |       |         |                                       |
| 1920 K01 | N | 476    | 480    | -0.62004866 | 477    | 480    | -0.11675352 | 3256129 | 2.34672434    | 2065016 | -0.99820771   | empty        |       |         |                                       |
| 1920 K02 | E | 196    | 200    | -2.11005392 | 236    | 240    | -0.23633374 | 107048  | -6.95244951   | 89251   | -7.17822004   | empty        |       |         |                                       |
| 1920 K03 | X | 514    | 520    | -0.41783366 | 556    | 560    | -0.0780512  | 2746387 | 0.84146631    | 2994109 | 2.496600815   | experimental | NINDS | 1500162 | Carisoprodol                          |
| 1920 K04 | X | 434    | 440    | -0.84354945 | 395    | 400    | -0.15744056 | 2505249 | 0.12939057    | 2377622 | 0.44288338    | experimental | NINDS | 1500267 | Doxylamine succinate                  |
| 1920 K05 | X | 475    | 480    | -0.65537811 | 435    | 440    | -0.17748135 | 2831585 | 1.09105432    | 2014608 | 2.85120335    | experimental | NINDS | 1500163 | Doxylamine                            |
| 1920 K06 | X | 473    | 480    | -0.636013   | 434    | 440    | -0.13808941 | 2538353 | 1.13304009    | 2364719 | 0.39991172    | experimental | NINDS | 1500268 | Doxylamine hydrochloride              |
| 1920 K07 | X | 434    | 440    | -0.84354945 | 514    | 520    | -0.09839473 | 2907592 | 1.31750148    | 2741367 | 1.65428584    | experimental | NINDS | 1500164 | Cefazolin sodium                      |
| 1920 K08 | X | 513    | 520    | -0.42315511 | 633    | 640    | -0.03934889 | 2795723 | 0.98715454    | 2413258 | 0.56246335    | experimental | NINDS | 1500269 | Daphylline                            |
| 1920 K09 | X | 594    | 600    | 0.00788213  | 554    | 560    | -0.07854739 | 3315294 | 2.52143742    | 2877931 | 2.10909337    | experimental | NINDS | 1500165 | Cefotaxime sodium                     |
| 1920 K10 | X | 473    | 480    | -0.636013   | 394    | 400    | -0.15793675 | 2762726 | 0.88971505    | 2613055 | 1.226966045   | experimental | NINDS | 1500270 | Trisodium ethylenediamine tetracetate |
| 1920 K11 | X | 433    | 440    | -0.8488709  | 514    | 520    | -0.09839473 | 2683200 | 0.65487635    | 2751649 | 1.68852862    | experimental | NINDS | 1500166 | Cephalothin sodium                    |
| 1920 K12 | X | 640    | 650    | 0.21541857  | 514    | 520    | 0.00345799  | 1763526 | -2.06090277   | 1766786 | -1.61186661   | experimental | NINDS | 1500272 | Emetine                               |
| 1920 K13 | X | 354    | 360    | -0.26926524 | 354    | 360    | -0.07854739 | 2668499 | 0.41160927152 | 2668499 | 0.41160927152 | experimental | NINDS | 1500167 | Chlaphirin sodium                     |
| 1920 K14 | X | 515    | 520    | -0.41251221 | 473    | 480    | -0.11873825 | 2718593 | 0.75939118    | 2522992 | 0.92701808    | experimental | NINDS | 1500273 | Ephedrine (1r,2s) hydrochloride       |
| 1920 K15 | X | 473    | 480    | -0.636013   | 553    | 560    | -0.07904357 | 2618980 | 0.46523596    | 2835829 | 1.96887848    | experimental | NINDS | 1500180 | Chlorothiazide                        |
| 1920 K16 | X | 511    | 520    | -0.433798   | 713    | 720    | 0.00034579  | 2670224 | 0.61655848    | 2437965 | 0.6438474     | experimental | NINDS | 1500274 | Adrenaline bitartrate                 |
| 1920 K17 | X | 872    | 880    | 1.48724449  | 633    | 640    | -0.03934889 | 2599688 | 0.40826707    | 2633940 | 1.29651506    | experimental | NINDS | 1500181 | Chlorotrianisene                      |
| 1920 K18 | X | 1112   | 1120   | 2.76439185  | 793    | 800    | 0.04004047  | 2300331 | -0.47572823   | 2622011 | 1.25678717    | experimental | NINDS | 1500275 | Equilin                               |
| 1920 K19 | X | 470    | 480    | -0.65197734 | 672    | 680    | -0.01999773 | 2372218 | -0.26344734   | 2888570 | 2.14452509    | experimental | NINDS | 1500182 | Chloroxylenol                         |
| 1920 K20 | X | 751    | 760    | 0.84334936  | 952    | 960    | 0.11893365  | 2823400 | 1.06888417    | 2488917 | 0.8135336     | experimental | NINDS | 1500276 | Ergocalciferol                        |
| 1920 K21 | X | 791    | 800    | 1.05620726  | 751    | 760    | 0.01920076  | 3053085 | 1.74713943    | 2790951 | 1.8194185     | experimental | NINDS | 1500183 | Chlorpheniramine (s) maleate          |
| 1920 K22 | X | 750    | 760    | 0.83802791  | 710    | 720    | -0.00114276 | 2413994 | -0.14008364   | 2432635 | 0.62609657    | experimental | NINDS | 1500277 | Ergonovine maleate                    |
| 1920 K23 | E | 926    | 1440   | 1.77460265  | 608    | 1080   | -0.05175348 | 84458   | -7.01915733   | 87006   | -7.1856697    | empty        |       |         |                                       |
| 1920 K24 | P | 172868 | 174000 | 916.754903  | 159363 | 160360 | 78.7198589  | 2689460 | 0.673362      | 2305607 | 0.20304737    | empty        |       |         |                                       |
| 1920 L01 | N | 636    | 640    | 0.23138292  | 436    | 440    | -0.13709704 | 2361269 | -0.29577952   | 2274894 | 0.10076197    | empty        |       |         |                                       |
| 1920 L02 | E | 234    | 240    | -1.90783892 | 276    | 280    | -0.2164864  | 80325   | -7.031362     | 87088   | -7.18542361   | empty        |       |         |                                       |
| 1920 L03 | X | 1035   | 1040   | 2.35464041  | 475    | 480    | -0.11774588 | 2138045 | -0.95495557   | 2014608 | -0.76608459   | experimental | NINDS | 1500381 | Megestrol acetate                     |
| 1920 L04 | X | 513    | 520    | -0.42315511 | 514    | 520    | -0.09839473 | 2522231 | 0.17953808    | 2698948 | 1.51301522    | experimental | NINDS | 1500382 | Procainamide hydrochloride            |
| 1920 L05 | X | 354    | 360    | -1.26926524 | 514    | 520    | -0.09839473 | 2405479 | -0.16522827   | 2174254 | -0.23440565   | experimental | NINDS | 1500383 | Mepenzolate bromide                   |
| 1920 L06 | X | 755    | 760    | 0.86463515  | 594    | 600    | -0.05870005 | 2390556 | -0.44996348   | 2578846 | 1.11303211    | experimental | NINDS | 1500504 | Meclozine hydrochloride               |
| 1920 L07 | X | 393    | 400    | -1.06172879 | 754    | 760    | 0.02068931  | 2250674 | -0.62236437   | 2137087 | -0.3581852    | experimental | NINDS | 1500387 | Procainopurine                        |
| 1920 L08 | X | 714    | 720    | 0.64645581  | 433    | 440    | -0.13858559 | 2207763 | -0.7490797    | 1914193 | -1.10050287   | experimental | NINDS | 1500505 | Prochlorperazine edisylate            |
| 1920 L09 | X | 673    | 680    | 0.42827647  | 434    | 440    | -0.13808941 | 2615734 | 0.45565059    | 2436693 | 0.69961118    | experimental | NINDS | 1500390 | Metaproterenol                        |
| 1920 L10 | X | 753    | 760    | -0.21029721 | 475    | 480    | -0.11774588 | 2845049 | 1.13576622    | 1367876 | 0.41042567    | experimental | NINDS | 1500277 | Crocylic acid hydrochloride           |
| 1920 L11 | X | 514    | 520    | -0.64645581 | 354    | 360    | -0.07854739 | 2467248 | 0.01717437    | 2367005 | 0.40759293    | experimental | NINDS | 1500393 | Methacholine chloride                 |
| 1920 L12 | X | 549    | 560    | -0.231583   | 474    | 480    | -0.11824207 | 2913629 | 1.33532862    | 2376628 | 0.439573      | experimental | NINDS | 1500508 | Progesterone                          |
| 1920 L13 | X | 475    | 480    | -0.62537011 | 435    | 440    | -0.13759322 |         |               |         |               |              |       |         |                                       |

|          |   |        |        |             |             |        |            |             |             |             |             |             |              |       |         |                                 |
|----------|---|--------|--------|-------------|-------------|--------|------------|-------------|-------------|-------------|-------------|-------------|--------------|-------|---------|---------------------------------|
| 1920 M07 | X |        | 394    | 400         | -1.05640734 | 474    | 480        | -0.11824207 | 2646785     | 0.54734357  | 2434452     | 0.63214784  | experimental | NINDS | 1500186 | Chlortetracycline hydrochloride |
| 1920 M08 | X |        | 594    | 600         | 0.00788213  | 513    | 520        | -0.09888091 | 2533090     | 0.21160449  | 2370098     | 0.41782574  | experimental | NINDS | 1500283 | Estradiol cypionate             |
| 1920 M09 | X |        | 474    | 480         | -0.63069155 | 514    | 520        | -0.09839473 | 2533334     | 0.21232502  | 2409468     | 0.54894208  | experimental | NINDS | 1500187 | Chlorthalidone                  |
| 1920 M10 | X |        | 454    | 440         | -0.84354945 | 474    | 480        | -0.11824207 | 2462511     | 0.0031861   | 2320705     | 0.25332917  | experimental | NINDS | 1500284 | Estradiol valerate              |
| 1920 M11 | X |        | 550    | 560         | -0.28626156 | 475    | 480        | -0.11774588 | 2287558     | -0.51344661 | 2435466     | 0.63754349  | experimental | NINDS | 1500168 | Ephedrine                       |
| 1920 M12 | X |        | 1874   | 1880        | 6.81933473  | 395    | 400        | -0.15744056 | 2366490     | -0.28036201 | 2123383     | -0.40382448 | experimental | NINDS | 1500285 | Estril                          |
| 1920 M13 | X |        | 309    | 320         | -1.50873037 | 233    | 240        | -0.23782229 | 1112690     | -3.98280859 | 192470      | -3.17106541 | experimental | NINDS | 1500169 | Cetylpyridinium chloride        |
| 1920 M14 | X |        | 474    | 480         | -0.63069155 | 513    | 640        | -0.03934889 | 2429583     | -0.09404963 | 2470316     | 0.517581794 | experimental | NINDS | 1500286 | Estrone                         |
| 1920 M15 | X |        | 594    | 600         | 0.00788213  | 634    | 880        | 0.08023133  | 2584079     | 0.362174    | 2618953     | 1.24660293  | experimental | NINDS | 1500171 | Chlorambucil                    |
| 1920 M16 | X |        | 392    | 400         | -1.06705024 | 552    | 560        | -0.07953975 | 2302429     | -0.46953288 | 2204348     | -0.13418174 | experimental | NINDS | 1500287 | Ethacrynic acid                 |
| 1920 M17 | X |        | 673    | 680         | 0.42827647  | 834    | 840        | 0.06038399  | 2573891     | 0.33208904  | 2518594     | 0.91237114  | experimental | NINDS | 1500173 | Chloramphenicol hemisuccinate   |
| 1920 M18 | X |        | 712    | 720         | 0.63581291  | 632    | 640        | -0.03984507 | 2774022     | 0.92307192  | 2315644     | 0.24083699  | experimental | NINDS | 1500288 | Ethambutol hydrochloride        |
| 1920 M19 | X |        | 912    | 920         | 1.70010238  | 753    | 760        | 0.02019313  | 2592991     | 0.38849096  | 2662360     | 1.40781575  | experimental | NINDS | 1500174 | Chloramphenicol                 |
| 1920 M20 | X |        | 791    | 800         | 1.05620726  | 672    | 680        | -0.01999773 | 2196760     | -0.78157134 | 2238904     | -0.01909775 | experimental | NINDS | 1500291 | Ethinyl estradiol               |
| 1920 M21 | X |        | 551    | 560         | -0.22094011 | 752    | 760        | 0.01969695  | 2367299     | -0.27797305 | 2495880     | 0.83672531  | experimental | NINDS | 1500177 | Chlorhexidine                   |
| 1920 M22 | X |        | 910    | 920         | 1.68945949  | 709    | 720        | -0.00163894 | 2238732     | -0.65762886 | 2187543     | -0.19014847 | experimental | NINDS | 1500292 | Ethionamide                     |
| 1920 M23 | E |        | 1018   | 1640        | 2.2641758   | 789    | 1360       | 0.03805574  | 85773       | -7.01527416 | 90905       | -7.17271162 | empty        |       |         |                                 |
| 1920 M24 | P | 210038 | 211200 | 1114.5531   | 193479      | 194880 | 95.6476554 | 2394443     | -0.19781736 | 2514156     | 0.897591    | empty       |              |       |         |                                 |
| 1920 N01 | N |        | 436    | 440         | -0.83290655 | 276    | 280        | -0.2164864  | 2227251     | -0.69153202 | 21755647    | -0.22876645 | empty        |       |         |                                 |
| 1920 N02 | E |        | 155    | 160         | -2.32823326 | 197    | 200        | -0.2556849  | 79950       | -7.03246937 | 81129       | -7.20526923 | empty        |       |         |                                 |
| 1920 N03 | X |        | 594    | 600         | 0.00788213  | 435    | 440        | -0.13759322 | 1947682     | -1.51709374 | 1974450     | -0.89982526 | experimental | NINDS | 1500399 | Methoxamine hydrochloride       |
| 1920 N04 | X |        | 594    | 600         | 0.00788213  | 554    | 560        | -0.07854739 | 2393731     | -0.19991988 | 2909539     | -0.51320689 | experimental | NINDS | 1500516 | Pseudoephedrine hydrochloride   |
| 1920 N05 | X |        | 553    | 560         | -0.21029721 | 354    | 360        | -0.17784009 | 2062239     | -1.17880919 | 2060795     | -0.61226517 | experimental | NINDS | 1500400 | Methoxsalen                     |
| 1920 N06 | X |        | 632    | 640         | 0.21009713  | 635    | 640        | -0.03835652 | 2403036     | -0.1724424  | 2459310     | 0.71493397  | experimental | NINDS | 1500517 | Pyrantel pamoate                |
| 1920 N07 | X |        | 474    | 480         | -0.63069155 | 392    | 400        | -0.15892911 | 2220274     | -0.71213497 | 2037951     | -0.68834395 | experimental | NINDS | 1500401 | Methscopolamine bromide         |
| 1920 N08 | X |        | 453    | 440         | -0.84887609 | 834    | 840        | -0.06038399 | 2265950     | 0.37725464  | 2584800     | 0.90332023  | experimental | NINDS | 1500518 | Razafinamide                    |
| 1920 N09 | X |        | 514    | 520         | -0.41783366 | 674    | 680        | -0.01900537 | 2157585     | -0.89754534 | 1973399     | -0.90332547 | experimental | NINDS | 1500402 | Methopropate                    |
| 1920 N10 | X |        | 473    | 480         | -0.636013   | 472    | 480        | -0.11923443 | 2338980     | -0.3615985  | 2126894     | -0.39213158 | experimental | NINDS | 1500519 | Pyriminidine maleate            |
| 1920 N11 | X |        | 554    | 560         | -0.20497577 | 634    | 640        | -0.03885271 | 2218062     | -0.71866696 | 2146333     | -0.32739268 | experimental | NINDS | 1500404 | Methylergonovine maleate        |
| 1920 N12 | X |        | 548    | 560         | -0.23690445 | 633    | 640        | -0.03934889 | 2254539     | -0.6109511  | 2455613     | 0.70262163  | experimental | NINDS | 1500520 | Pyrimethamine                   |
| 1920 N13 | X |        | 1074   | 1080        | 2.56217686  | 794    | 800        | 0.04053665  | 2209243     | -0.74470929 | 2154820     | -0.2991279  | experimental | NINDS | 1500406 | Methylprednisolone              |
| 1920 N14 | X |        | 832    | 840         | 1.2743866   | 752    | 760        | 0.01969695  | 1550365     | -2.69036298 | 1535176     | -2.36276662 | experimental | NINDS | 1500521 | Pyrvinium pamoate               |
| 1920 N15 | X |        | 392    | 400         | -1.06705024 | 472    | 480        | -0.11923443 | 2376421     | -0.25103597 | 2149949     | -0.31535009 | experimental | NINDS | 1500410 | Metoclopramide hydrochloride    |
| 1920 N16 | X |        | 354    | 360         | -0.83290655 | 473    | 480        | -0.11873825 | 2384425     | -0.70214134 | 2105781     | -1.66494218 | experimental | NINDS | 1500522 | Quinacrine hydrochloride        |
| 1920 N17 | X |        | 633    | 640         | 0.21541857  | 552    | 560        | -0.07904357 | 2177602     | -0.83814454 | 2077463     | -0.5567547  | experimental | NINDS | 1500411 | Metoprolol tartrate             |
| 1920 N18 | X |        | 552    | 560         | -0.21561866 | 593    | 600        | -0.05919623 | 2436592     | -0.07335219 | 2423219     | -0.00472724 | experimental | NINDS | 1500523 | Quinidine gluconate             |
| 1920 N19 | X |        | 632    | 640         | 0.21009713  | 633    | 640        | -0.03934889 | 2176671     | -0.84089376 | 2042909     | -0.67183202 | experimental | NINDS | 1500412 | Metronidazole                   |
| 1920 N20 | X |        | 592    | 600         | -0.00276077 | 512    | 520        | -0.09938709 | 2216972     | -0.72188571 | 2140158     | -0.34795766 | experimental | NINDS | 1500524 | Quinine sulfate                 |
| 1920 N21 | X |        | 552    | 560         | -0.21561866 | 553    | 560        | -0.07904357 | 1895142     | -1.67224332 | 1984116     | -0.86763398 | experimental | NINDS | 1500413 | Miconazole nitrate              |
| 1920 N22 | X |        | 789    | 800         | 1.04556436  | 792    | 800        | 0.03954429  | 2453705     | -0.02281784 | 2156656     | -0.29301335 | experimental | NINDS | 1500525 | Racephedrine hydrochloride      |
| 1920 N23 | E |        | 1360   | 98.98170699 | 193479      | 83694  | 77.0214134 | 83694       | 77.0214134  | 77.0214134  | 77.0214134  | 77.0214134  | empty        |       |         |                                 |
| 1920 N24 | P | 196378 | 197560 | 1041.86213  | 188177      | 189320 | 93.0168904 | 2101991     | -1.06142332 | 2154512     | -0.30015365 | empty       |              |       |         |                                 |
| 1920 O01 | N |        | 476    | 480         | -0.62004866 | 517    | 520        | -0.09609618 | 2765410     | 0.89764085  | 1934272     | -1.03363254 | empty        |       |         |                                 |
| 1920 O02 | E |        | 275    | 280         | -1.68965958 | 156    | 160        | -0.27602842 | 253206      | -6.52084783 | 82516       | -7.20065002 | empty        |       |         |                                 |
| 1920 O03 | X |        | 794    | 800         | 1.0721716   | 595    | 600        | -0.05820386 | 2868255     | 1.2013401   | 2181477     | -0.21035044 | experimental | NINDS | 1500178 | Chlorocresol                    |
| 1920 O04 | X |        | 512    | 520         | -0.42847655 | 473    | 480        | -0.11873825 | 2331384     | -0.38402933 | 1760487     | -1.61239947 | experimental | NINDS | 1500293 | Ethopropazine hydrochloride     |
| 1920 O05 | X |        | 631    | 640         | 0.20477568  | 475    | 480        | -0.11774588 | 2488127     | 0.07882964  | 1867812     | -1.25496881 | experimental | NINDS | 1500179 | Chloroquine diphosphate         |
| 1920 O06 | X |        | 1193   | 1200        | 3.49542900  | 675    | 680        | -0.11873825 | 2311136     | -0.44382128 | 1992375     | -0.83947971 | experimental | NINDS | 1500295 | Eucaliptol hydrochloride        |
| 1920 O07 | X |        | 600    | 600         | 0.00808291  | 674    | 680        | -0.01900537 | 2157585     | -0.02612376 | 1958159     | -0.34391127 | experimental | NINDS | 1500180 | Chlorzoxazone                   |
| 1920 O08 | X |        | 754    | 760         | 0.8593137   | 353    | 360        | -0.17828027 | 2278321     | -0.54072332 | 2049317     | -0.65049106 | experimental | NINDS | 1500296 | Eugenol                         |
| 1920 O09 | X |        | 632    | 640         | 0.21009713  | 392    | 400        | -0.15892911 | 2298040     | -0.48249351 | 2230349     | -0.04728927 | experimental | NINDS | 1500189 | Clopirox olamine                |
| 1920 O10 | X |        | 874    | 880         | 1.49788739  | 955    | 960        | -0.1204222  | 2094487     | -1.08358149 | 2050850     | -0.64538562 | experimental | NINDS | 1500299 | Fludrocortisone acetate         |
| 1920 O11 | X |        | 432    | 440         | -0.85419234 | 392    | 400        | -0.15892911 | 2043276     | -1.23480656 | 2135522     | -0.36339722 | experimental | NINDS | 1500190 | Cinoxacin                       |
| 1920 O12 | X |        | 754    | 760         | 0.8593137   | 714    | 720        | 0.00084197  | 2416286     | -1.13331541 | 2063995     | -0.60160801 | experimental | NINDS | 1500300 | Flumethazone pivalate           |
| 1920 O13 | X |        | 471    | 480         | -0.6466559  | 511    | 520        | -0.09988328 | 1970886     | -1.44857279 | 2016070     | -0.76121256 | experimental | NINDS | 1500191 | Clemastine                      |
| 1920 O14 | X |        | 631    | 640         | 0.20477568  | 672    | 680        | -0.01999773 | 2245486     | -0.63768443 | 2105785     | -0.46243219 | experimental | NINDS | 1500303 | Fluocinonide                    |
| 1920 O15 | X |        | 992    | 1000        | 2.12581817  | 793    | 800        | 0.04004047  | 2395445     | -0.19485847 | 2327640     | 0.27642523  | experimental | NINDS | 1500192 | Clidinium bromide               |
| 1920 O16 | X |        | 672    | 680         | 0.42295502  | 673    | 680        | -0.01950155 | 2317645     | -0.42460033 | 2269527     | 0.08288792  | experimental | NINDS | 1500304 | Fluorometholone                 |
| 1920 O17 | X |        | 711    | 720         | 0.63049147  | 592    | 600        | -0.05969241 | 2431673     | -0.0878779  | 2165048     | -0.26506496 | experimental | NINDS | 1500195 | Clofibric acid                  |
| 1920 O18 | X |        | 793    | 800         | 1.06685015  | 712    | 720        | -0.00015039 | 2109490     | -1.03927792 | 2138818     | -0.35242035 | experimental | NINDS | 1500305 | Fluorouracil                    |
| 1920 O19 | X |        | 672    | 680         | 0.42295502  | 632    | 640        | -0.03984507 | 2570817     | 0.32301157  | 2294908     | 0.16741583  | experimental | NINDS | 1500196 | Flumiphene citrate              |
| 1920 O20 | X |        | 752    | 760         | 0.84867081  | 873    | 880        | 0.07973515  | 2192043     | -0.79550055 | 2250088     | 0.01814901  | experimental | NINDS | 1500308 | Flurbiprofen                    |
| 1920 O21 | X |        | 711    | 720         | 0.63049147  | 472    | 480        | -0.11873825 | 1866909     | -1.75561481 | 1958732     | -0.95217189 | experimental | NINDS | 1500200 | Citrimizole                     |
| 1920 O22 | X |        | 790    | 800         | 1.05088581  | 474    | 480        | -0.1202268  | 1253152     | -3.56802708 | 1066020     | -3.92522585 | experimental | NINDS | 1500309 | Furazolidone                    |
| 1920 O23 | E |        | 702    | 1280        | 0.58259844  | 534    | 1120       | -0.08847106 | 90547       | -7.00117663 | 84930       | -7.19261053 | empty        |       |         |                                 |
| 1920 O24 | P | 194275 | 195640 | 1030.67113  | 197932      | 199280 | 97.8571605 | 2144756     | -0.93513812 | 2233078     | -0.03850044 | empty       |              |       |         |                                 |
| 1920 P01 | N |        | 758    | 760         | 0.88059949  | 718    | 720        | 0.00282671  | 1837244     | -1.84321497 | 1781799     | -1.54142279 | empty        |       |         |                                 |
| 1920 P02 | E |        | 235    | 240         | -1.90251747 | 195    | 200        | -0.25667727 | 72875       | -7.05336117 | 76193       | -7.2217079  | empty        |       |         |                                 |
| 1920 P03 | X |        | 595    | 600         | 0.01320358  | 796    | 800        | 0.04152902  | 1943050     | -1.53077195 | 1933381     | -1.03659989 | experimental | NINDS | 1500415 | Minoxidil                       |
| 1920 P04 | X |        | 555    | 560         | 0.86463515  | 715    | 720        | 0.00138116  | 2192546     | -0.79401528 | 1912568     | -0.43840275 | experimental | NINDS | 1500526 | Reserpine                       |
| 1920 P05 | X |        | 674    | 680         | 0.43358922  | 435    | 440        | -0.13759322 | 1908356     | -1.63026966 | 1958159     | -0.9        |              |       |         |                                 |

|          |   |        |        |             |             |        |             |            |              |             |             |              |              |         |                                |              |
|----------|---|--------|--------|-------------|-------------|--------|-------------|------------|--------------|-------------|-------------|--------------|--------------|---------|--------------------------------|--------------|
| 1921 A01 | N | 718    | 720    | -0.05645334 | 798         | 800    | 0.10907872  | 1471446    | -1.11502386  | 1557210     | -0.97868565 | empty        |              |         |                                |              |
| 1921 A02 | E | 156    | 160    | -0.44929377 | 156         | 160    | -0.56646486 | 80772      | -2.48326179  | 82861       | -2.37406749 | empty        |              |         |                                |              |
| 1921 A03 | X | 556    | 560    | -0.16969204 | 556         | 560    | -0.14556544 | 1964730    | -0.62969812  | 2065605     | -0.49752064 | experimental | NINDS        | 1500539 | Spironolactone                 |              |
| 1921 A04 | X | 635    | 635    | -0.17091904 | 635         | 640    | -0.16643778 | 1795251    | -0.79644288  | 1903533     | -0.65091195 | experimental | NINDS        | 1500563 | Yohimbine hydrochloride        |              |
| 1921 A05 | X | 475    | 480    | -0.26311339 | 595         | 600    | -0.10527774 | 2039342    | -0.55628982  | 2193737     | -0.52838811 | experimental | NINDS        | 1500545 | Streptococin sulfate           |              |
| 1921 A06 | X | 596    | 600    | -0.14173187 | 675         | 680    | -0.02034786 | 1768087    | -0.82316864  | 2003683     | -0.55612606 | experimental | NINDS        | 1500665 | Acetabutoil hydrochloride      |              |
| 1921 A07 | X | 355    | 355    | 360         | -0.31019191 | 394    | 400         | -0.3160297 | 2148532      | -0.44886144 | 2255783     | -0.31752871  | experimental | NINDS   | 1500543                        | Streptozosin |
| 1921 A08 | X | 795    | 800    | -0.002623   | 914         | 920    | 0.23113955  | 1932380    | -0.66152621  | 1985020     | -0.57378945 | experimental | NINDS        | 1500666 | Acemetacin                     |              |
| 1921 A09 | X | 673    | 680    | -0.08790853 | 954         | 960    | 0.27322949  | 2189373    | -0.40867934  | 2554810     | -0.03451778 | experimental | NINDS        | 1500544 | Sulfabenzamide                 |              |
| 1921 A10 | X | 834    | 840    | 0.02463117  | 514         | 520    | -0.18975987 | 2019073    | -0.57623185  | 2061396     | -0.50150421 | experimental | NINDS        | 1500667 | Adenosine phosphate            |              |
| 1921 A11 | X | 515    | 520    | -0.19835122 | 475         | 480    | -0.23079757 | 2138312    | -0.458991656 | 2323537     | -0.25340366 | experimental | NINDS        | 1500545 | Sulfacetamide                  |              |
| 1921 A12 | X | 395    | 400    | -0.28223174 | 596         | 600    | -0.10347549 | 1953511    | -0.63581679  | 192434      | -0.62947416 | experimental | NINDS        | 1500668 | Ketolifen fumarate             |              |
| 1921 A13 | X | 395    | 400    | -0.28223174 | 275         | 280    | -0.44124728 | 2150963    | -0.44646966  | 2258198     | -0.31524306 | experimental | NINDS        | 1500546 | Sulfadiazine                   |              |
| 1921 A14 | X | 676    | 680    | -0.08581152 | 556         | 560    | -0.14556544 | 2026215    | -0.56920508  | 2105731     | -0.45954382 | experimental | NINDS        | 1500669 | Benfluorex hydrochloride       |              |
| 1921 A15 | X | 434    | 440    | -0.25497057 | 396         | 400    | -0.3139252  | 2224176    | -0.37443783  | 2333198     | -0.24426011 | experimental | NINDS        | 1500547 | Sulfamerazine                  |              |
| 1921 A16 | X | 755    | 760    | -0.03059018 | 435         | 440    | -0.27288751 | 2078944    | -0.51732676  | 2193397     | -0.37657327 | experimental | NINDS        | 1500673 | Sulfamethizole                 |              |
| 1921 A17 | X | 752    | 760    | -0.03268719 | 554         | 560    | -0.14766993 | 2095533    | -0.50100054  | 2473326     | -0.11163746 | experimental | NINDS        | 1500548 | Sulfamethazine                 |              |
| 1921 A18 | X | 1154   | 1160   | 0.24831255  | 1234        | 1240   | 0.56785909  | 2197698    | -0.40048865  | 2060832     | -0.502038   | experimental | NINDS        | 1500674 | Mycophenolic acid              |              |
| 1921 A19 | X | 671    | 680    | -0.08930654 | 631         | 640    | -0.06664679 | 2214806    | -0.38365666  | 2292027     | -0.28322596 | experimental | NINDS        | 1500549 | Sulfamethizole                 |              |
| 1921 A20 | X | 1034   | 1040   | 0.16443203  | 875         | 880    | 0.19010186  | 2133636    | -0.46351712  | 2185620     | -0.38393373 | experimental | NINDS        | 1500675 | Oleandomycin phosphate         |              |
| 1921 A21 | X | 953    | 960    | 0.10781268  | 594         | 600    | -0.10557999 | 2139900    | -0.45735418  | 2212801     | -0.35820856 | experimental | NINDS        | 1500550 | Sulfamethoxazole               |              |
| 1921 A22 | X | 628    | 640    | -0.11936373 | 391         | 400    | -0.31918645 | 1372990    | -1.21189144  | 1489965     | -1.04232896 | experimental | NINDS        | 1500676 | Ouabain                        |              |
| 1921 A23 | E | 1087   | 2080   | 0.20147926  | 1021        | 1760   | 0.34373015  | 83985      | -2.48010062  | 81918       | -2.37495998 | empty        |              |         |                                |              |
| 1921 A24 | P | 340307 | 341040 | 237.317729  | 252760      | 253480 | 265.235731  | 2309515    | -0.29047562  | 1933308     | -0.62273172 | empty        |              |         |                                |              |
| 1921 B01 | N | 595    | 600    | -0.14243087 | 396         | 400    | -0.3139252  | 2066411    | -0.52965757  | 2083561     | -0.48052638 | empty        |              |         |                                |              |
| 1921 B02 | E | 595    | 600    | -0.4220128  | 156         | 160    | -0.56646486 | 80772      | -2.48326179  | 82861       | -2.37406749 | empty        |              |         |                                |              |
| 1921 B03 | X | 594    | 600    | -0.14312987 | 476         | 480    | -0.22974532 | 2263721    | -0.33553082  | 2038294     | -0.33368885 | experimental | NINDS        | 1501002 | Droperidol                     |              |
| 1921 B04 | X | 634    | 640    | -0.1151697  | 434         | 440    | -0.27393976 | 2679404    | -0.07344587  | 2505515     | -0.08117253 | experimental | NINDS        | 1501203 | Retinol                        |              |
| 1921 B05 | X | 434    | 440    | -0.25497057 | 434         | 440    | -0.27393976 | 2313560    | -0.28649588  | 2208204     | -0.36255934 | experimental | NINDS        | 1501003 | Famotidine                     |              |
| 1921 B06 | X | 435    | 440    | -0.25427156 | 634         | 640    | -0.06349005 | 2574042    | -0.0302163   | 2494735     | -0.09137514 | experimental | NINDS        | 1501204 | Lapachol                       |              |
| 1921 B07 | X | 315    | 320    | -0.33815208 | 473         | 480    | -0.23290207 | 2389616    | -0.21166691  | 2522336     | -0.06525247 | experimental | NINDS        | 1501004 | Dropropizine                   |              |
| 1921 B08 | X | 553    | 560    | -0.17178905 | 753         | 760    | 0.06172753  | 1857178    | -0.73551496  | 2220770     | -0.35066639 | experimental | NINDS        | 1501205 | Lanatoside c                   |              |
| 1921 B09 | X | 793    | 800    | -0.00402801 | 592         | 600    | -0.10768449 | 2386900    | -0.21433909  | 2433425     | -0.14940134 | experimental | NINDS        | 1501005 | Etodolac                       |              |
| 1921 B10 | X | 673    | 680    | -0.04927184 | 474         | 480    | -0.22974532 | 2241874    | -0.17985479  | 2262922     | -0.09139066 | experimental | NINDS        | 1501206 | Terbutaline maleate            |              |
| 1921 B11 | X | 473    | 480    | -0.2277094  | 594         | 600    | -0.10557999 | 2514219    | -0.08907416  | 2651272     | -0.05720352 | experimental | NINDS        | 1501007 | Fentorol hydrobromide          |              |
| 1921 B12 | X | 634    | 640    | -0.1151697  | 593         | 600    | -0.10663224 | 2568141    | -0.0360221   | 2373886     | -0.20575139 | experimental | NINDS        | 1501215 | Ketoprofen                     |              |
| 1921 B13 | X | 754    | 760    | -0.03128918 | 714         | 720    | 0.02068984  | 2184572    | -0.41340289  | 2321099     | -0.25571108 | experimental | NINDS        | 1501008 | Fenfenbut                      |              |
| 1921 B14 | X | 472    | 480    | -0.2284084  | 673         | 680    | -0.02245235 | 2725981    | -0.11927143  | 2603745     | 0.0117962   | experimental | NINDS        | 1501217 | Lisinopril                     |              |
| 1921 B15 | X | 674    | 680    | -0.08720953 | 474         | 480    | -0.23184982 | 1884048    | -0.70907846  | 1980542     | -0.57802761 | experimental | NINDS        | 1501009 | 1,9-tyrhydrastine              |              |
| 1921 B16 | X | 472    | 480    | -0.2284084  | 594         | 600    | -0.10557999 | 2535749    | -0.06789151  | 2611078     | 0.01873644  | experimental | NINDS        | 1502001 | Acetyl-l-leucine               |              |
| 1921 B17 | X | 840    | 840    | -0.11018637 | 631         | 640    | -0.06172753 | 2344893    | -0.25173282  | 2377706     | -0.36572759 | experimental | NINDS        | 1501010 | Tetrolidate                    |              |
| 1921 B18 | X | 749    | 760    | -0.0347842  | 831         | 840    | 0.14380292  | 2321495    | -0.2786889   | 2339126     | -0.23864962 | experimental | NINDS        | 1502003 | Buformin                       |              |
| 1921 B19 | X | 952    | 960    | 0.10711368  | 832         | 840    | 0.14485517  | 2627245    | 0.02212837   | 2430429     | -0.15223687 | experimental | NINDS        | 1501011 | Fenoprofen                     |              |
| 1921 B20 | X | 510    | 520    | -0.20184624 | 431         | 440    | -0.27709651 | 2386851    | -0.2143873   | 2506001     | -0.08071256 | experimental | NINDS        | 1502004 | Bumetanide                     |              |
| 1921 B21 | X | 870    | 880    | 0.04979532  | 753         | 760    | 0.06172753  | 2212139    | -0.38628063  | 2201087     | -0.36929515 | experimental | NINDS        | 1501015 | Flufenamic acid                |              |
| 1921 B22 | P | 1149   | 1160   | 0.24481753  | 630         | 640    | -0.06769904 | 2504962    | -0.09818181  | 2384320     | -0.19587624 | experimental | NINDS        | 1502005 | Carbenoxolone sodium           |              |
| 1921 B23 | E | 580    | 1320   | 0.25191594  | 795         | 1520   | 0.10592197  | 91746      | -2.47246483  | 89489       | -2.36779449 | empty        |              |         |                                |              |
| 1921 B24 | E | 249608 | 251120 | 173.918735  | 245508      | 246760 | 257.604829  | 2032833    | 3.56269385   | 1673310     | 3.73626452  | empty        |              |         |                                |              |
| 1921 C01 | N | 637    | 640    | -0.11307269 | 397         | 400    | -0.21827956 | 2090022    | -0.50125295  | 1981310     | -0.62700074 | empty        |              |         |                                |              |
| 1921 C02 | E | 196    | 200    | -0.4213336  | 197         | 200    | -0.52332267 | 88101      | -2.47605103  | 89862       | -2.36744147 | empty        |              |         |                                |              |
| 1921 C03 | X | 553    | 560    | -0.17178905 | 354         | 360    | -0.35811964 | 2743213    | 0.13622543   | 2861350     | 0.2556037   | experimental | NINDS        | 1500551 | Sulfapyridine                  |              |
| 1921 C04 | X | 513    | 520    | -0.19974923 | 555         | 560    | -0.14661768 | 2233843    | -0.36492679  | 2325340     | -0.25169723 | experimental | NINDS        | 1500677 | Albuterol (+/-)                |              |
| 1921 C05 | X | 474    | 480    | -0.22701039 | 394         | 400    | -0.3160297  | 2104257    | -0.49242215  | 2780979     | 0.17953743  | experimental | NINDS        | 1500552 | Sulfasalazine                  |              |
| 1921 C06 | X | 515    | 520    | -0.19835122 | 594         | 600    | -0.10557999 | 2232962    | -0.36579357  | 2405279     | -0.17603982 | experimental | NINDS        | 1500678 | Gamga-aminobutyric acid        |              |
| 1921 C07 | X | 434    | 440    | -0.25497057 | 754         | 760    | 0.06277978  | 2671997    | 0.06615837   | 2225975     | -0.34574017 | experimental | NINDS        | 1500553 | Sulfathiazole                  |              |
| 1921 C08 | X | 633    | 640    | -0.11586871 | 432         | 440    | -0.27604426 | 2442477    | -0.15965873  | 2368242     | -0.21109309 | experimental | NINDS        | 1500679 | Aminopterin                    |              |
| 1921 C09 | X | 512    | 520    | -0.20044823 | 554         | 560    | -0.14766993 | 2420490    | -0.18129101  | 2536450     | -0.05189443 | experimental | NINDS        | 1500554 | Sulfipyraxone                  |              |
| 1921 C10 | X | 553    | 560    | -0.17178905 | 394         | 400    | -0.3160297  | 2351364    | -0.24930178  | 2439962     | -0.14321446 | experimental | NINDS        | 1500680 | Arecoline hydrobromide         |              |
| 1921 C11 | X | 434    | 440    | -0.25497057 | 554         | 560    | -0.14766993 | 2564292    | -0.039809    | 2627176     | 0.03397222  | experimental | NINDS        | 1500556 | Sulindac                       |              |
| 1921 C12 | X | 474    | 480    | -0.22701039 | 513         | 520    | -0.19081212 | 2283174    | -0.31639166  | 2461477     | -0.12285182 | experimental | NINDS        | 1500682 | Captopril                      |              |
| 1921 C13 | X | 433    | 440    | -0.25566957 | 553         | 560    | -0.14872218 | 2133131    | -0.46401398  | 2270228     | -0.30385739 | experimental | NINDS        | 1500557 | Tamoxifen citrate              |              |
| 1921 C14 | X | 673    | 680    | -0.08790853 | 591         | 600    | -0.10873674 | 2349422    | -0.25121245  | 2606307     | 0.01422098  | experimental | NINDS        | 1500684 | Cimetidine                     |              |
| 1921 C15 | X | 553    | 560    | -0.17178905 | 554         | 560    | -0.14766993 | 2647002    | 0.04156662   | 2877706     | 0.36572759  | experimental | NINDS        | 1500518 | Terbutaline hemisulfate        |              |
| 1921 C16 | X | 344    | 400    | -0.31788096 | 472         | 480    | -0.2395431  | 2160660    | -0.43692911  | 2251462     | -0.32161827 | experimental | NINDS        | 1500685 | Clozapine                      |              |
| 1921 C17 | X | 17753  | 17760  | 11.8510854  | 674         | 680    | -0.02140011 | 2675360    | 0.06946712   | 2384801     | -0.195421   | experimental | NINDS        | 1500564 | Tracracine hydrochloride       |              |
| 1921 C18 | X | 663    | 720    | -0.09489858 | 472         | 480    | -0.2395431  | 2488475    | -0.11440283  | 2458109     | -0.12603943 | experimental | NINDS        | 1500687 | 1,9-tyrhydrastine              |              |
| 1921 C19 | X | 672    | 680    | -0.08860754 | 753         | 760    | 0.06172753  | 2619879    | 0.0148812    | 2497665     | -0.08860208 | experimental | NINDS        | 1500566 | Tetracycline hydrochloride     |              |
| 1921 C20 | X | 713    | 720    | -0.05994836 | 632         | 640    | -0.0645423  | 2295339    | -0.30442292  | 2420664     | -0.16147884 | experimental | NINDS        | 1500688 | Kyrenic acid                   |              |
| 1921 C21 | X | 754    | 760    | -0.03338619 | 592         | 600    | -0.10768449 | 2524638    | -0.07882325  | 2439493     | -0.14365835 | experimental | NINDS        | 1500567 | Sulfathiazole                  |              |
| 1921 C22 | X | 909    | 920    | 0.07702949  | 571         | 580    | 0.05963303  | 2200424    | -0.39780663  | 2322770     | -0.29908545 | experimental | NINDS        | 1500568 | Tetrahydrozoline hydrochloride |              |
| 1921 C23 | E | 830    | 1360   | 0.02183515  | 676         | 1200   | -0.01929561 | 92063      | -0.07215295  | 89113       | -0.36815035 | empty        |              |         |                                |              |
| 1921 C24 | P | 178635 | 179840 | 124.3083    | 176150      | 177360 | 184.622968  | 2480313    | -0.12243315  | 2254215     | -0.31909791 | empty        |              |         |                                |              |
| 1921 D01 | N | 396    | 400    | -0.28153273 | 477         | 480    | -0.22869307 | 2361556    | -0.23927421  |             |             |              |              |         |                                |              |

|          |   |        |        |            |             |        |            |             |             |              |             |             |              |       |         |                                   |
|----------|---|--------|--------|------------|-------------|--------|------------|-------------|-------------|--------------|-------------|-------------|--------------|-------|---------|-----------------------------------|
| 1921 D19 | X |        | 433    | 440        | -0.25566957 | 592    | 600        | -0.10768449 | 2272334     | -0.32705677  | 2308230     | -0.26789801 | experimental | NINDS | 1501108 | Mefexamide                        |
| 1921 D20 | X |        | 549    | 560        | -0.17458507 | 710    | 720        | 0.01648084  | 2572691     | -0.03154555  | 2789378     | 0.18748657  | experimental | NINDS | 1502020 | Folic acid                        |
| 1921 D21 | X |        | 631    | 640        | -0.11726671 | 550    | 560        | -0.15187893 | 2498469     | -0.10457006  | 2352168     | -0.22630616 | experimental | NINDS | 1501109 | Prubocul                          |
| 1921 D22 | X |        | 670    | 680        | -0.09000555 | 829    | 840        | -0.14169842 | 2420702     | -0.18108243  | 2341332     | -0.23656177 | experimental | NINDS | 1502021 | Phthalylsulfathiazole             |
| 1921 E   | X |        | 637    | 1120       | -0.11307269 | 938    | 1440       | 0.25639351  | 92283       | -0.47193649  | empty       | empty       | empty        | empty | empty   | empty                             |
| 1921 D24 | P | 162600 | 163640 | 113.099766 | 168928      | 170080 | 177.023629 | 2160100     | -0.43748007 | 2064110      | -0.49893557 | empty       | empty        | empty | empty   | empty                             |
| 1921 E01 | N |        | 677    | 680        | -0.08511251 | 397    | 400        | -0.31287296 | 2203667     | -0.39461595  | 2159164     | -0.40897273 | experimental | NINDS | 1500568 | Theophylline                      |
| 1921 E02 | E |        | 196    | 200        | -0.42133336 | 236    | 240        | -0.48228497 | 90973       | -2.47322536  | 94958       | -2.36261842 | experimental | NINDS | 1500690 | Melatonin                         |
| 1921 E03 | X |        | 512    | 520        | -0.20044823 | 513    | 520        | -0.19081212 | 2648885     | 0.04341924   | 2668778     | 0.07334599  | experimental | NINDS | 1500691 | Phentolamine hydrochloride        |
| 1921 E04 | X |        | 433    | 440        | -0.25566957 | 512    | 520        | -0.19186437 | 2474393     | -0.12825764  | 2622176     | 0.02924003  | experimental | NINDS | 1500575 | Acetyltryptophan                  |
| 1921 E05 | X |        | 874    | 880        | 0.05259134  | 1233   | 1240       | 0.56680684  | 2676003     | 0.07009974   | 2871778     | 0.26547317  | experimental | NINDS | 1500702 | Acetyltryptophan                  |
| 1921 E06 | X |        | 502    | 520        | -0.20743827 | 582    | 600        | -0.11820697 | 2533413     | -0.07018982  | 22840       | -0.28997314 | experimental | NINDS | 1500576 | Thiothixene                       |
| 1921 E07 | X |        | 4594   | 4600       | 2.65288745  | 4034   | 4040       | 3.51415506  | 2363925     | -0.23694343  | 1871463     | -0.68126426 | experimental | NINDS | 1500572 | Thimerosal                        |
| 1921 E08 | X |        | 542    | 560        | -0.1794781  | 464    | 480        | -0.2423723  | 2525152     | -0.07831754  | 2504422     | -0.08220699 | experimental | NINDS | 1500695 | Acetyl tyrosine ethyl ester       |
| 1921 E09 | X |        | 353    | 360        | -0.31158992 | 514    | 520        | -0.18975987 | 2522079     | -0.08134097  | 2363701     | -0.21539087 | experimental | NINDS | 1500573 | Thioguanine                       |
| 1921 E10 | X |        | 513    | 520        | -0.19974923 | 475    | 480        | -0.23079757 | 2336268     | -0.26415423  | 2766121     | 0.16547523  | experimental | NINDS | 1500699 | Acetyltryptophanamide             |
| 1921 E11 | X |        | 634    | 640        | -0.1151697  | 234    | 240        | -0.48438947 | 2711859     | 0.10537727   | 2191703     | -0.37817654 | experimental | NINDS | 1500575 | Thioridazine hydrochloride        |
| 1921 E12 | X |        | 472    | 480        | -0.2284084  | 595    | 600        | -0.10452774 | 2237938     | -0.36089785  | 2587376     | -0.00369606 | experimental | NINDS | 1500702 | Acetyltryptophan                  |
| 1921 E13 | X |        | 593    | 600        | -0.14382888 | 394    | 400        | -0.3160297  | 2209973     | -0.38841169  | 2318633     | -0.2580405  | experimental | NINDS | 1500576 | Thiothixene                       |
| 1921 E14 | X |        | 512    | 520        | -0.20044823 | 473    | 480        | -0.23290207 | 2433858     | -0.16813868  | 2611068     | 0.01872698  | experimental | NINDS | 1500703 | Acetylglutamic acid               |
| 1921 E15 | X |        | 594    | 600        | -0.14312987 | 394    | 400        | -0.3160297  | 2769658     | 0.16224378   | 2925888     | 0.316685    | experimental | NINDS | 1500578 | Timolol maleate                   |
| 1921 E16 | X |        | 553    | 560        | -0.17178905 | 473    | 480        | -0.23290207 | 2405440     | -0.1960982   | 2529274     | -0.05868608 | experimental | NINDS | 1500704 | N-acetylproline                   |
| 1921 E17 | X |        | 634    | 640        | -0.1151697  | 754    | 760        | 0.06277978  | 2696706     | 0.09046874   | 2655745     | 0.06101105  | experimental | NINDS | 1500580 | Tolazoline hydrochloride          |
| 1921 E18 | X |        | 673    | 680        | -0.08790853 | 513    | 520        | -0.19081212 | 2799666     | 0.19176766   | 2702918     | 0.10565743  | experimental | NINDS | 1500707 | Citroten                          |
| 1921 E19 | X |        | 549    | 560        | -0.17458507 | 550    | 560        | -0.15187893 | 2509618     | -0.09360093  | 2553902     | -0.03537717 | experimental | NINDS | 1500582 | Tolmetin sodium                   |
| 1921 E20 | X |        | 594    | 600        | -0.17748985 | 431    | 440        | -0.27499201 | 2399361     | 0.204791     | 2318122     | -0.25643215 | experimental | NINDS | 1500583 | Thrynsol                          |
| 1921 E21 | X |        | 1069   | 1080       | -0.8898718  | 1269   | 1280       | 0.60468779  | 2723027     | 0.18365009   | 2411571     | -0.0088577  | experimental | NINDS | 1500583 | Togifattate                       |
| 1921 E22 | X |        | 749    | 760        | -0.0347842  | 868    | 880        | 0.18273612  | 2358672     | -0.24211168  | 2169035     | -0.39963043 | experimental | NINDS | 1500715 | Acetylglucosamine                 |
| 1921 E23 | E |        | 595    | 1120       | -0.14243087 | 796    | 1440       | 0.10697422  | 93006       | -2.47122516  | 92413       | -2.3650271  | empty        | empty | empty   | empty                             |
| 1921 E24 | P | 177288 | 178280 | 123.366741 | 218092      | 219120 | 228.756377 | 2578918     | -0.02541896 | 2417581      | -0.16439672 | 2480362     | -0.10497832  | empty | empty   | empty                             |
| 1921 F01 | N |        | 516    | 520        | -0.19765221 | 437    | 440        | -0.27078301 | 2530362     | -0.0731916   | 2480362     | -0.10497832 | empty        | empty | empty   | empty                             |
| 1921 F02 | E |        | 154    | 160        | -0.45069178 | 195    | 200        | -0.52542717 | 91079       | -2.47312107  | 89755       | -2.36754274 | experimental | NINDS | 1501110 | Mebendazole                       |
| 1921 F03 | X |        | 1074   | 1080       | 0.11923922  | 954    | 960        | 0.27322949  | 2379370     | -0.22174761  | 2368206     | -0.21112716 | experimental | NINDS | 1501111 | Ripecemic acid                    |
| 1921 F04 | X |        | 515    | 520        | -0.20044823 | 236    | 240        | -0.48228497 | 90973       | -2.47322536  | 94958       | -2.36261842 | experimental | NINDS | 1501111 | Protoporpyrin ix                  |
| 1921 F05 | X |        | 753    | 760        | -0.03198819 | 712    | 720        | 0.01858534  | 1982331     | -0.61238108  | 2295810     | -0.27964558 | experimental | NINDS | 1502025 | Succinylsulfathiazole             |
| 1921 F06 | X |        | 314    | 320        | -0.33885109 | 433    | 440        | -0.27499201 | 2812919     | 0.20480684   | 2652254     | 0.05770703  | experimental | NINDS | 1501113 | Peruvoside                        |
| 1921 F07 | X |        | 503    | 520        | -0.20673927 | 423    | 440        | -0.28551449 | 2000557     | -0.59444913  | 1631497     | -0.90837752 | experimental | NINDS | 1502026 | Tranexamic acid                   |
| 1921 F08 | X |        | 514    | 520        | -0.19905022 | 475    | 480        | -0.23079757 | 3471692     | 0.8529517    | 2938177     | 0.32901616  | experimental | NINDS | 1501114 | Pimethixene maleate               |
| 1921 F09 | X |        | 474    | 480        | -0.22701039 | 474    | 480        | -0.23184982 | 2224243     | -0.37437191  | 2136133     | -0.43077017 | experimental | NINDS | 1502028 | Cephalexin                        |
| 1921 F10 | X |        | 634    | 640        | -0.1151697  | 435    | 440        | -0.27288751 | 3365769     | 0.74873758   | 2757279     | 0.15710682  | experimental | NINDS | 1502030 | Triamcinolone hydrochloride       |
| 1921 F11 | X |        | 594    | 600        | -0.14382888 | 394    | 400        | -0.3160297  | 2605399     | 0.00606481   | 2605399     | 0.00606481  | experimental | NINDS | 1502030 | Meibhydrolin naphthalenesulfonate |
| 1921 F12 | X |        | 833    | 840        | 0.02393216  | 474    | 480        | -0.23184982 | 2658293     | 0.05267596   | 2911367     | 0.30929415  | experimental | NINDS | 1501116 | Cefoxitin sodium                  |
| 1921 F13 | X |        | 792    | 800        | -0.00472702 | 554    | 560        | -0.14766993 | 2422739     | -0.17907829  | 2426948     | -0.15553143 | experimental | NINDS | 1501117 | Mebeverine hydrochloride          |
| 1921 F14 | X |        | 632    | 640        | -0.11656771 | 514    | 520        | -0.18975987 | 2607637     | 0.00283671   | 2848300     | 0.24325267  | experimental | NINDS | 1502031 | Cefuroxime sodium                 |
| 1921 F15 | X |        | 593    | 600        | -0.14382888 | 394    | 400        | -0.3160297  | 2832080     | 0.22365871   | 2815473     | 0.2121839   | experimental | NINDS | 1501118 | Mecloxycline sulfosalicylate      |
| 1921 F16 | X |        | 514    | 520        | -0.19905022 | 394    | 400        | -0.3160297  | 2832080     | 0.22365871   | 2815473     | 0.2121839   | experimental | NINDS | 1502033 | Metampicillin sodium              |
| 1921 F17 | X |        | 474    | 480        | -0.22701039 | 514    | 520        | -0.18975987 | 2319189     | -0.28095769  | 2278874     | -0.29567448 | experimental | NINDS | 1501119 | Trimethoprim                      |
| 1921 F18 | X |        | 594    | 600        | -0.14312987 | 394    | 400        | -0.3160297  | 2832080     | 0.22365871   | 2815473     | 0.2121839   | experimental | NINDS | 1502037 | Lomefloxacin hydrochloride        |
| 1921 F19 | X |        | 592    | 600        | -0.15297888 | 793    | 800        | 0.10381747  | 2254908     | -0.14420163  | 2211712     | -0.35923924 | experimental | NINDS | 1501120 | Miniprine hydrochloride           |
| 1921 F20 | X |        | 749    | 760        | -0.0347842  | 868    | 880        | 0.18273612  | 2358672     | -0.24211168  | 2169035     | -0.39963043 | experimental | NINDS | 1502037 | Fosfomicin                        |
| 1921 F21 | X |        | 590    | 600        | -0.14592589 | 549    | 560        | 0.27112499  | 2285163     | -0.31443474  | 2457578     | -0.12654199 | experimental | NINDS | 1502039 | Fosfomicin                        |
| 1921 F22 | X |        | 870    | 880        | 0.04979532  | 589    | 600        | -0.11084123 | 2399133     | -0.20230345  | 2435592     | -0.1473504  | experimental | NINDS | 1502039 | Fosfomicin                        |
| 1921 F23 | E |        | 595    | 1120       | -0.14243087 | 580    | 1120       | -0.12031147 | 93878       | -2.47036723  | 91772       | -2.36563377 | empty        | empty | empty   | empty                             |
| 1921 F24 | P | 176798 | 177800 | 123.024229 | 182418      | 183480 | 191.218462 | 2162495     | -0.43512371 | 2064326      | -0.49873114 | 2354664     | -0.16675941  | empty | empty   | empty                             |
| 1921 G01 | N |        | 436    | 440        | -0.25357256 | 357    | 360        | -0.3549629  | 2103238     | -0.499342471 | 2354664     | -0.16675941 | empty        | empty | empty   | empty                             |
| 1921 G02 | E |        | 155    | 160        | -0.44989278 | 236    | 240        | -0.48228497 | 88971       | -2.47519506  | 90909       | -2.36722284 | experimental | NINDS | 1500584 | Tranlycypromine sulfate           |
| 1921 G03 | X |        | 833    | 840        | 0.02393216  | 634    | 640        | -0.06349005 | 2414624     | -0.18706237  | 3107778     | 0.48883284  | experimental | NINDS | 1500750 | Neohesperidin dihydrochalcone     |
| 1921 G04 | X |        | 473    | 480        | -0.2277094  | 433    | 440        | -0.27499201 | 2447766     | -0.15445506  | 2764675     | 0.16410668  | experimental | NINDS | 1500585 | Riactin                           |
| 1921 G05 | X |        | 594    | 600        | -0.14312987 | 632    | 640        | -0.0645423  | 2912693     | 0.30297117   | 2647858     | 0.05354648  | experimental | NINDS | 1500753 | Physostigmine                     |
| 1921 G06 | X |        | 314    | 320        | -0.33885109 | 792    | 800        | 0.10276523  | 2633808     | 0.02858548   | 2425777     | -0.15663971 | experimental | NINDS | 1500586 | Xanthurenic acid                  |
| 1921 G07 | X |        | 595    | 600        | -0.14243087 | 954    | 960        | 0.27322949  | 3357702     | 0.74080073   | 2483542     | -0.10196864 | experimental | NINDS | 1500754 | Nalidixic acid                    |
| 1921 G08 | X |        | 554    | 560        | -0.17109005 | 472    | 480        | -0.23954321 | 2888456     | 0.27912519   | 2852839     | 0.24754856  | experimental | NINDS | 1500588 | Triamcinolone diacetate           |
| 1921 G09 | X |        | 594    | 600        | -0.14312987 | 433    | 440        | -0.27499201 | 2733101     | 0.12627657   | 2703778     | 0.10647137  | experimental | NINDS | 1500760 | Lobeline hydrochloride            |
| 1921 G10 | X |        | 433    | 440        | -0.25566957 | 434    | 440        | -0.27393976 | 2485964     | -0.11687331  | 2638232     | 0.04443606  | experimental | NINDS | 1500590 | Hecogenin                         |
| 1921 G11 | X |        | 633    | 640        | -0.11586871 | 554    | 560        | -0.14766993 | 2940656     | 0.33048303   | 2872853     | 0.26649059  | experimental | NINDS | 1500591 | Trifluoperazine hydrochloride     |
| 1921 G12 | X |        | 592    | 600        | -0.14452788 | 513    | 520        | -0.19081212 | 2441158     | -0.16095645  | 2385065     | -0.19517114 | experimental | NINDS | 1500591 | Calciferol                        |
| 1921 G13 | X |        | 592    | 600        | -0.14452788 | 554    | 560        | -0.14766993 | 2765922     | 0.15856806   | 2319824     | -0.25691779 | experimental | NINDS | 1500592 | Triphenylenediy hydrochloride     |
| 1921 G14 | X |        | 632    | 640        | -0.08790853 | 314    | 320        | -0.40020959 | 2589264     | -0.15523988  | 2378886     | -0.20101919 | experimental | NINDS | 1500594 | Kinetin                           |
| 1921 G15 | X |        | 593    | 600        | -0.14382888 | 394    | 400        | -0.3160297  | 2147368     | -0.45000667  | 2151005     | -0.36659473 | experimental | NINDS | 1500594 | Trimethobenzamide hydrochloride   |
| 1921 G16 | X |        | 553    | 560        | -0.17178905 | 593    | 600        | -0.10653224 | 3839593     | 1.21491727   | 2354462     | 0.72224749  | experimental | NINDS | 1500763 | Cefazolin sodium                  |
| 1921 G17 |   |        |        |            |             |        |            |             |             |              |             |             |              |       |         |                                   |

|          |   |        |        |             |        |        |             |         |             |          |             |              |              |         |                                |            |
|----------|---|--------|--------|-------------|--------|--------|-------------|---------|-------------|----------|-------------|--------------|--------------|---------|--------------------------------|------------|
| 1921 H13 | X | 753    | 760    | -0.03198819 | 514    | 520    | -0.18975987 | 2902888 | 0.29332435  | 2597116  | 0.00552226  | experimental | NINDS        | 1501129 | Carbetapentane citrate         |            |
| 1921 H14 | X | 512    | 560    | -0.20044823 | 474    | 480    | -0.23184982 | 2844336 | 0.23571699  | 2883429  | 0.27650013  | experimental | NINDS        | 1502045 | Promidic acid                  |            |
| 1921 H15 | X | 14312  | 14320  | 9.44581154  | 513    | 520    | -0.19081212 | 2698549 | 0.092282    | 2536896  | -0.04957944 | experimental | NINDS        | 1501130 | Aminopyridine                  |            |
| 1921 H16 | X | 717    | 800    | -0.05175234 | 731    | 760    | 0.03857806  | 2869649 | 0.2606216   | 2603676  | 0.0117309   | experimental | NINDS        | 1502045 | Nevirovirine                   |            |
| 1921 H17 | X | 792    | 800    | -0.00472702 | 351    | 360    | -0.36127639 | 2517555 | -0.08379182 | 2338107  | 1.5898017   | experimental | NINDS        | 1501137 | Nevirovirine                   |            |
| 1921 H18 | X | 752    | 760    | -0.03268719 | 992    | 1000   | 0.31321494  | 2536480 | -0.0671723  | 2706914  | 0.1094394   | experimental | NINDS        | 1502047 | Lithyronine sodium             |            |
| 1921 H19 | X | 511    | 520    | -0.20114723 | 1032   | 1040   | 0.35530488  | 2387755 | -0.21349789 | 2349138  | -0.22917387 | experimental | NINDS        | 1501134 | Pinmozide                      |            |
| 1921 H20 | X | 593    | 600    | -0.14382888 | 431    | 440    | -0.27709651 | 2683285 | 0.07726426  | 2717613  | 0.11956535  | experimental | NINDS        | 1502050 | Cephaloridine                  |            |
| 1921 H21 | X | 592    | 600    | -0.14452788 | 712    | 720    | 0.01858534  | 2224096 | -0.37451654 | 1989187  | -0.56984564 | experimental | NINDS        | 1501135 | Nicardipine hydrochloride      |            |
| 1921 H22 | X | 869    | 880    | 0.04909632  | 829    | 840    | 0.14169842  | 2583541 | -0.02087055 | 2519341  | -0.06808706 | experimental | NINDS        | 1502082 | Indole-2-carboxylic acid       |            |
| 1921 H23 | E | 799    | 1320   | 0.00016601  | 911    | 1440   | 0.2279828   | 87284   | -2.47685484 | 90458    | -2.29566218 | empty        |              |         |                                |            |
| 1921 H24 | P | 175461 | 176520 | 122.089661  | 178309 | 179200 | 186.894773  | 207070  | -0.29288118 | 2761252  | 0.16086702  | empty        |              |         |                                |            |
| 1921 I01 | N | 515    | 520    | -0.19835122 | 477    | 480    | -0.22869307 | 2176344 | -0.42149814 | 2411625  | -0.17003372 | empty        |              |         |                                |            |
| 1921 I02 | E | 276    | 280    | -0.36541325 | 195    | 200    | -0.52542717 | 88514   | -2.47564469 | 90709    | -2.36663984 | empty        |              |         |                                |            |
| 1921 I03 | X | 513    | 520    | -0.19974923 | 715    | 720    | 0.02174209  | 2740042 | 0.13310559  | 2688528  | 0.09203817  | experimental | NINDS        | 1500595 | Trimethoprim                   |            |
| 1921 I04 | X | 674    | 680    | -0.08720953 | 594    | 600    | -0.10557999 | 2521942 | -0.08147576 | 2603639  | 0.01169588  | experimental | NINDS        | 1500772 | Idopamidol                     |            |
| 1921 I05 | X | 673    | 680    | -0.08790853 | 633    | 680    | -0.0645423  | 2704285 | 0.09792546  | 2776049  | 0.17487148  | experimental | NINDS        | 1500596 | Trioxsalen                     |            |
| 1921 I06 | X | 873    | 880    | 0.05189233  | 14712  | 14720  | 14.7500652  | 2661193 | 0.05552867  | 2278987  | -0.29566218 | experimental | NINDS        | 1500774 | Thyroxine                      |            |
| 1921 I07 | X | 552    | 560    | -0.17248806 | 393    | 440    | -0.31708195 | 3288723 | 0.67293459  | 2761252  | 0.16086702  | experimental | NINDS        | 1500598 | Triprolidine hydrochloride     |            |
| 1921 I08 | X | 592    | 600    | -0.14452788 | 474    | 480    | -0.23184982 | 2798024 | 0.19015215  | 2662713  | 0.06760584  | experimental | NINDS        | 1500779 | Sufprofen methyl ester         |            |
| 1921 I09 | X | 594    | 600    | -0.14312987 | 554    | 560    | -0.14766993 | 2589655 | -0.01485519 | 2826103  | 0.22224455  | experimental | NINDS        | 1500599 | Tropicamide                    |            |
| 1921 I10 | X | 433    | 440    | -0.25566957 | 594    | 600    | -0.10557999 | 2701709 | 0.09539102  | 2755637  | -0.01480631 | experimental | NINDS        | 1500801 | Allantoin                      |            |
| 1921 I11 | X | 593    | 600    | -0.14382888 | 474    | 480    | -0.23184982 | 3076892 | 0.4645211   | 2894307  | 0.28653996  | experimental | NINDS        | 1500600 | Triptophan                     |            |
| 1921 I12 | X | 594    | 600    | -0.14312987 | 594    | 600    | -0.10557999 | 2581980 | -0.02240636 | 2497088  | -0.08914817 | experimental | NINDS        | 1500804 | Alliazide                      |            |
| 1921 I13 | X | 472    | 480    | -0.2284084  | 433    | 440    | -0.27499201 | 3103552 | 0.49075099  | 3008043  | 0.39443972  | experimental | NINDS        | 1500601 | Tuaminoheptane sulfate         |            |
| 1921 I14 | X | 717    | 800    | -0.04042804 | 754    | 800    | -0.06277978 | 2517555 | -0.046398   | 2306503  | 0.0665482   | experimental | NINDS        | 1500807 | Adimolone                      |            |
| 1921 I15 | X | 793    | 800    | -0.05715234 | 650    | 680    | -0.04665407 | 2250726 | -0.34831616 | 2320662  | -0.34129853 | experimental | NINDS        | 1500603 | Tyrotrichin                    |            |
| 1921 I16 | X | 12991  | 13000  | 8.52242682  | 8672   | 8680   | 8.39448388  | 2802779 | 0.19483043  | 2732517  | 0.13367109  | S            | experimental | NINDS   | 1500810                        | Aminacrine |
| 1921 I17 | X | 716    | 760    | -0.05785135 | 610    | 640    | -0.08874401 | 2705332 | 0.09895557  | 2466966  | -0.11791236 | experimental | NINDS        | 1500604 | Urea                           |            |
| 1921 I18 | X | 632    | 640    | -0.11656771 | 673    | 680    | -0.02245235 | 2616536 | 0.01159214  | 2667455  | 0.07209385  | experimental | NINDS        | 1500811 | Berberine chloride             |            |
| 1921 I19 | X | 952    | 960    | 0.10711368  | 430    | 440    | -0.27814875 | 2908087 | 0.29843948  | 2664946  | 0.06971924  | experimental | NINDS        | 1500605 | Ursodiol                       |            |
| 1921 I20 | X | 632    | 640    | -0.11656771 | 673    | 680    | -0.02140011 | 2831571 | 0.22315793  | 2474520  | -0.11050742 | experimental | NINDS        | 1500812 | Bekanamycin sulfate            |            |
| 1921 I21 | X | 671    | 680    | -0.08930654 | 831    | 840    | 0.14380292  | 2681399 | 0.07540869  | 3125281  | 0.50539837  | experimental | NINDS        | 1500606 | Valproate sodium               |            |
| 1921 I22 | X | 909    | 920    | 0.07705649  | 829    | 909    | 0.07705649  | 2545677 | 0.0570412   | 2057042  | -0.1904661  | experimental | NINDS        | 1500813 | Budesonide                     |            |
| 1921 I23 | E | 497    | 1080   | -0.21093329 | 1007   | 1480   | 0.32899867  | 92703   | -2.47152327 | 87285    | -2.36988044 | empty        |              |         |                                |            |
| 1921 I24 | P | 196765 | 197800 | 136.981249  | 158791 | 159800 | 166.356986  | 2585885 | -0.01856436 | 2466257  | -0.11832784 | empty        |              |         |                                |            |
| 1921 J01 | N | 636    | 640    | -0.11377169 | 357    | 360    | -0.3549629  | 2440847 | -0.16126243 | 2360805  | -0.21813176 | empty        |              |         |                                |            |
| 1921 J02 | E | 195    | 200    | -0.4220326  | 237    | 240    | -0.48123273 | 85895   | -2.47822144 | 91143    | -2.36622908 | empty        |              |         |                                |            |
| 1921 J03 | X | 595    | 600    | -0.14243087 | 435    | 440    | -0.27288751 | 2330559 | -0.26977113 | 2399714  | -0.18130675 | experimental | NINDS        | 1501137 | Nefopam                        |            |
| 1921 J04 | X | 554    | 560    | -0.17190905 | 354    | 360    | -0.35811964 | 2482608 | -0.12017517 | 2369087  | -0.21029335 | experimental | NINDS        | 1502084 | Pfadiflen hydrochloride        |            |
| 1921 J05 | X | 493    | 600    | -0.08362974 | 593    | 600    | -0.08362974 | 2598505 | -0.0064796  | 24646809 | 0.05255367  | experimental | NINDS        | 1501138 | Cyclosporine hydrochloride     |            |
| 1921 J06 | X | 673    | 680    | -0.08790853 | 592    | 640    | -0.10768449 | 2756511 | 0.14930889  | 2708820  | 0.11124331  | experimental | NINDS        | 1502085 | Cyclocresatin                  |            |
| 1921 J07 | X | 791    | 800    | -0.00542602 | 632    | 640    | -0.06349005 | 2597495 | -0.00714167 | 2318168  | -0.25848509 | experimental | NINDS        | 1501139 | Pramoxine hydrochloride        |            |
| 1921 J08 | X | 1153   | 1160   | 0.24761355  | 434    | 440    | -0.27604426 | 2790416 | 0.18266689  | 2941172  | 0.33115038  | experimental | NINDS        | 1502094 | Rosmarinic acid                |            |
| 1921 J09 | X | 511    | 520    | -0.20114723 | 594    | 600    | -0.10557999 | 2885140 | 0.27586269  | 2710119  | 0.11247274  | experimental | NINDS        | 1501140 | Mephesisin                     |            |
| 1921 J10 | X | 674    | 680    | -0.08720953 | 673    | 680    | -0.02245235 | 2997864 | 0.38676808  | 2905857  | 0.29772687  | experimental | NINDS        | 1502101 | Perillic acid (-)              |            |
| 1921 J11 | X | 793    | 800    | -0.00402801 | 514    | 520    | -0.18975987 | 2751010 | 0.14389664  | 2527580  | -0.06028935 | experimental | NINDS        | 1501142 | Sulfachloropyridazine          |            |
| 1921 J12 | X | 512    | 520    | -0.20044823 | 514    | 520    | -0.18975987 | 3117643 | 0.50461466  | 2527586  | 2.62927596  | experimental | NINDS        | 1502102 | Quinolonic acid                |            |
| 1921 J13 | X | 514    | 520    | -0.19905022 | 514    | 520    | -0.18975987 | 6579267 | 0.05208412  | 2686803  | 0.09490556  | experimental | NINDS        | 1501143 | Sulfaphenazole                 |            |
| 1921 J14 | X | 633    | 640    | -0.11586871 | 474    | 480    | -0.23184982 | 2975308 | 0.36457598  | 2723897  | 0.12551278  | experimental | NINDS        | 1502103 | Anthraquinone                  |            |
| 1921 J15 | X | 630    | 640    | -0.11796572 | 431    | 440    | -0.27709651 | 2632401 | 0.02720118  | 2849607  | 0.24448966  | experimental | NINDS        | 1501144 | Sulfadimethoxine               |            |
| 1921 J16 | X | 756    | 800    | -0.02989117 | 531    | 560    | -0.17187165 | 3252680 | 0.63747308  | 3153446  | 0.53205483  | experimental | NINDS        | 1502106 | Carboplatin                    |            |
| 1921 J17 | X | 632    | 640    | -0.11656771 | 554    | 560    | -0.14766993 | 2454387 | -0.14794088 | 2388854  | -0.19158508 | experimental | NINDS        | 1505364 | Cefprozil                      |            |
| 1921 J18 | X | 352    | 360    | -0.31228892 | 432    | 440    | -0.27604426 | 2781262 | 0.17366057  | 2603615  | 0.01167317  | experimental | NINDS        | 1502107 | Cisplatin                      |            |
| 1921 J19 | X | 992    | 1000   | 0.13507385  | 994    | 1000   | 0.31531943  | 2540867 | -0.06285608 | 2696074  | 0.09918     | experimental | NINDS        | 1501146 | Sulfaguanidine                 |            |
| 1921 J20 | X | 631    | 640    | -0.11726671 | 511    | 520    | -0.19291662 | 2995222 | 0.38416871  | 3221688  | 0.59664175  | experimental | NINDS        | 1502109 | Zidovudine [a:1]               |            |
| 1921 J21 | X | 790    | 800    | -0.00612503 | 792    | 800    | 0.10276523  | 2485815 | -0.11701991 | 2407012  | -0.17439964 | experimental | NINDS        | 1501147 | Sulfamonomethoxine             |            |
| 1921 J22 | X | 1148   | 1160   | 0.24411853  | 709    | 720    | 0.01542859  | 2076093 | -0.52013177 | 1966769  | -0.59106292 | experimental | NINDS        | 1502111 | Azactidine                     |            |
| 1921 J23 | E | 829    | 1360   | 0.02113614  | 664    | 1160   | -0.03192259 | 90577   | -2.47361497 | 91576    | -2.36581927 | empty        |              |         |                                |            |
| 1921 J24 | P | 178787 | 179840 | 124.414549  | 166799 | 167880 | 174.783392  | 2435189 | -0.16682915 | 2356321  | -0.22237559 | empty        |              |         |                                |            |
| 1921 K01 | N | 516    | 520    | -0.19765221 | 477    | 480    | -0.22869307 | 2135578 | -0.46160645 | 2537573  | -0.05083158 | empty        |              |         |                                |            |
| 1921 K02 | E | 155    | 160    | -0.44999278 | 196    | 200    | -0.52437492 | 90311   | -2.47387668 | 90190    | -2.36713104 | empty        |              |         |                                |            |
| 1921 K03 | X | 596    | 600    | -0.14173187 | 493    | 440    | -0.27183526 | 2899855 | 0.29034028  | 2646809  | 0.05255367  | experimental | NINDS        | 1500607 | Vancomycin hydrochloride       |            |
| 1921 K04 | X | 512    | 520    | -0.20044823 | 473    | 480    | -0.23290207 | 2388682 | -0.21258584 | 2561990  | -0.02772237 | experimental | NINDS        | 1500822 | Brucine                        |            |
| 1921 K05 | X | 594    | 600    | -0.14312987 | 713    | 720    | 0.01963759  | 3462167 | 0.84358037  | 2626361  | 0.03320087  | experimental | NINDS        | 1500609 | Vidarabine                     |            |
| 1921 K06 | X | 393    | 400    | -0.28362974 | 553    | 560    | -0.14872218 | 2490349 | -0.11255904 | 2394957  | -0.18580897 | experimental | NINDS        | 1500828 | Canrenoic acid, potassium salt |            |
| 1921 K07 | X | 673    | 680    | -0.08790853 | 471    | 480    | -0.23500656 | 3138892 | 0.52552084  | 2966842  | 0.35544548  | experimental | NINDS        | 1500613 | Warfarin                       |            |
| 1921 K08 | X | 552    | 560    | -0.17248806 | 995    | 1000   | 0.31637168  | 2729459 | 0.12269332  | 2573827  | -0.01651937 | experimental | NINDS        | 1500833 | Canavanine                     |            |
| 1921 K09 | X | 634    | 640    | -0.1151697  | 552    | 560    | -0.14977443 | 3245279 | 0.63019148  | 2868612  | 0.26276067  | experimental | NINDS        | 1500614 | Xylometazoline hydrochloride   |            |
| 1921 K10 | X | 472    | 480    | -0.2284084  | 684    | 680    | -0.02146111 | 2601043 | -0.00365091 | 2726589  | 0.12615524  | experimental | NINDS        | 1500836 | Cephalosporin c sodium         |            |
| 1921 K11 | X | 513    | 520    | -0.19974923 | 474    | 480    | -0.23184982 | 3103857 | 0.49105107  | 2688110  | 0.27439998  | experimental | NINDS        | 1500615 | Zomepirate sodium              |            |
| 1921 K12 | X | 914    | 920    | 0.08055151  | 554    | 560    | -0.14766993 | 2504638 | -0.09850059 | 2569660  | -0.02046318 | experimental | NINDS        | 1500837 | Chenodiol                      |            |
| 1921 K13 | X | 513    | 520    | -0.19974923 | 554    | 560    | -0.14766993 | 2744998 | 0.1379816   |          |             |              |              |         |                                |            |



|          |   |        |        |            |             |        |            |             |             |              |             |             |              |       |         |                               |
|----------|---|--------|--------|------------|-------------|--------|------------|-------------|-------------|--------------|-------------|-------------|--------------|-------|---------|-------------------------------|
| 1921 L07 | X |        | 674    | 680        | -0.08720953 | 915    | 920        | 0.2321918   | 2681302     | 0.07531325   | 2493684     | -0.09236985 | experimental | NINDS | 1501151 | Ranitidine                    |
| 1921 L08 | X |        | 433    | 440        | -0.25566957 | 351    | 360        | -0.36127639 | 2894432     | 0.28500477   | 3115154     | 0.49581378  | experimental | NINDS | 1502128 | Cycloleucine                  |
| 1921 L09 | X |        | 593    | 600        | -0.14382888 | 515    | 520        | -0.18870763 | 2523779     | -0.07966839  | 2419766     | -0.16232875 | experimental | NINDS | 1501152 | Spiperone                     |
| 1921 L10 | X |        | 915    | 920        | 0.08125052  | 514    | 520        | -0.18975987 | 2973059     | 0.26236327   | 2876411     | 0.26580802  | experimental | NINDS | 1502155 | N (g)-nitro-l-arginine        |
| 1921 L11 | X |        | 272    | 280        | -0.36820927 | 274    | 280        | -0.44229953 | 1048907     | 0.1035074594 | 10363071    | 0.47165855  | experimental | NINDS | 1501153 | Sullectidil                   |
| 1921 L12 | X |        | 593    | 600        | -0.14382888 | 472    | 480        | -0.23395431 | 3009048     | 0.39777165   | 2637384     | 0.04363348  | experimental | NINDS | 1502195 | Piracetam                     |
| 1921 L13 | X |        | 353    | 360        | -0.31158992 | 633    | 640        | -0.0645423  | 2517206     | -0.08613535  | 2406665     | -0.17472805 | experimental | NINDS | 1501154 | Rindazole                     |
| 1921 L14 | X |        | 513    | 520        | -0.19974923 | 794    | 800        | 0.10486972  | 3122704     | 0.50959401   | 2778029     | 0.17674543  | experimental | NINDS | 1502196 | Ethosuximide                  |
| 1921 L15 | X |        | 592    | 600        | -0.14452788 | 511    | 520        | -0.19291662 | 2669206     | 0.0634124    | 2417159     | -0.16479612 | experimental | NINDS | 1501155 | Sulfamer                      |
| 1921 L16 | X |        | 552    | 560        | -0.17248806 | 394    | 400        | -0.3160297  | 2846644     | 0.23798775   | 3000226     | 0.38685212  | experimental | NINDS | 1502197 | Piperidolate hydrochloride    |
| 1921 L17 | X |        | 552    | 560        | -0.17248806 | 633    | 640        | -0.0645423  | 2394855     | -0.20651243  | 2453385     | -0.13051041 | experimental | NINDS | 1501156 | Sulfamethoxypyridazine        |
| 1921 L18 | X |        | 672    | 680        | -0.08860754 | 633    | 640        | -0.0645423  | 2788121     | 0.18040892   | 2767526     | 0.16586934  | experimental | NINDS | 1502198 | Amisindione                   |
| 1921 L19 | X |        | 791    | 800        | -0.00542602 | 630    | 640        | -0.06769904 | 2488053     | -0.11481802  | 2349897     | -0.22845552 | experimental | NINDS | 1501161 | Suprofen                      |
| 1921 L20 | X |        | 871    | 880        | 0.05049433  | 1072   | 1080       | 0.39739482  | 2736743     | 0.12985981   | 2708625     | 0.111105876 | experimental | NINDS | 1502202 | Cyclosporine                  |
| 1921 L21 | X |        | 751    | 760        | -0.03338619 | 671    | 680        | -0.02455685 | 2781412     | 0.17380815   | 2674391     | 0.07865835  | experimental | NINDS | 1501170 | Acetaminosalol                |
| 1921 L22 | X |        | 708    | 720        | -0.06344338 | 709    | 720        | 0.01542859  | 2686005     | 0.07994038   | 2945568     | 0.33531093  | experimental | NINDS | 1502203 | Troleanolysin                 |
| 1921 L23 | E |        | 926    | 1480       | 0.08893956  | 729    | 1280       | 0.03647357  | 90504       | -2.47368679  | 90937       | -2.36642405 | empty        |       |         |                               |
| 1921 L24 | P | 187167 | 188080 | 130.272205 | 185790      | 186960 | 194.724554 | 2196484     | -0.40168307 | 2302809      | -0.27302145 | 1987121     | -0.57180099  | empty |         |                               |
| 1921 M01 | N |        | 836    | 840        | 0.02602917  | 557    | 560        | -0.14451319 | 2123355     | -0.47363226  | 1987121     | -0.57180099 | empty        |       |         |                               |
| 1921 M02 | E |        | 194    | 200        | -0.42273161 | 195    | 200        | -0.52542717 | 84407       | -2.47968543  | 87786       | -2.36940628 | empty        |       |         |                               |
| 1921 M03 | X |        | 755    | 760        | -0.03059018 | 916    | 920        | 0.23244005  | 2152837     | -0.4446259   | 2020202     | -0.54049183 | experimental | NINDS | 1500626 | Dichlorophene                 |
| 1921 M04 | X |        | 789    | 800        | -0.00682403 | 508    | 520        | -0.19607337 | 5151678     | 2.50583409   | 5186777     | 2.45647921  | experimental | NINDS | 1500665 | Harmalol hydrochloride        |
| 1921 M05 | X |        | 630    | 640        | -0.11796572 | 709    | 720        | 0.01542859  | 2725412     | 0.11871161   | 2975166     | 0.36332364  | experimental | NINDS | 1500629 | Flopropione                   |
| 1921 M06 | X |        | 1394   | 1400       | 0.41607359  | 1914   | 1920       | 1.28338811  | 2323236     | -0.27697599  | 2405761     | -0.17558364 | experimental | NINDS | 1500867 | Harmine                       |
| 1921 M07 | X |        | 470    | 480        | -0.22980641 | 589    | 600        | -0.11084123 | 2684748     | 0.07870366   | 2780562     | 0.17922794  | experimental | NINDS | 1500632 | Hexestrol                     |
| 1921 M08 | X |        | 654    | 660        | -0.11519562 | 594    | 600        | -0.10557999 | 2551680     | -0.05221753  | 2605411     | 0.03330828  | experimental | NINDS | 1500635 | Hormosin                      |
| 1921 M09 | X |        | 272    | 280        | -0.36820927 | 234    | 240        | -0.48438947 | 122225      | -1.4586107   | 1109809     | -4.0212733  | experimental | NINDS | 1500633 | Hecatinine                    |
| 1921 M10 | X |        | 473    | 480        | -0.2277094  | 475    | 480        | -0.23079757 | 2530761     | -0.07279904  | 2458719     | -0.1254621  | experimental | NINDS | 1500872 | Palmitine chloride            |
| 1921 M11 | X |        | 633    | 640        | -0.11586871 | 513    | 520        | -0.19081212 | 2533604     | -0.0700019   | 2793196     | 0.19110008  | experimental | NINDS | 1500634 | Ipromiazid sulfate            |
| 1921 M12 | X |        | 992    | 1000       | 0.13507385  | 1234   | 1240       | 0.56785909  | 2326531     | -0.27373414  | 2419608     | -0.16247829 | experimental | NINDS | 1500873 | Piperine                      |
| 1921 M13 | X |        | 791    | 800        | -0.00542602 | 551    | 560        | -0.15082668 | 2816643     | 0.20847076   | 2537817     | -0.05006065 | experimental | NINDS | 1500636 | Mecysteine hydrochloride      |
| 1921 M14 | X |        | 831    | 840        | 0.02253415  | 593    | 600        | -0.10663224 | 8390912     | 5.69280877   | 8764854     | 5.84291191  | experimental | NINDS | 1500899 | Esculetin                     |
| 1921 M15 | X |        | 632    | 640        | -0.11656771 | 594    | 600        | -0.10557999 | 2332313     | -0.26804543  | 2624831     | 0.03175282  | experimental | NINDS | 1500637 | Merbromin                     |
| 1921 M16 | X |        | 431    | 440        | -0.16899333 | 469    | 480        | -0.23711106 | 6486322     | 8.8198202    | 6749727     | 3.36718499  | experimental | NINDS | 1500638 | Esculetin                     |
| 1921 M17 | X |        | 471    | 480        | -0.22910741 | 753    | 760        | 0.06172753  | 2550666     | -0.05321517  | 2798737     | -0.1963443  | experimental | NINDS | 1500639 | Octopamine hydrochloride      |
| 1921 M18 | X |        | 913    | 920        | 0.07985251  | 752    | 760        | 0.06067528  | 2464530     | -0.13796151  | 2156710     | -0.11429529 | experimental | NINDS | 1500903 | Etoposide                     |
| 1921 M19 | X |        | 632    | 640        | -0.11656771 | 1073   | 1080       | 0.39844707  | 2462051     | -0.14040052  | 2365902     | -0.21330776 | experimental | NINDS | 1500641 | Pentamidine isethionate       |
| 1921 M20 | X |        | 672    | 680        | -0.08860754 | 550    | 560        | -0.15187893 | 2456919     | -0.14544972  | 2407537     | -0.17390276 | experimental | NINDS | 1500906 | Lithocacin acid               |
| 1921 M21 | X |        | 751    | 760        | -0.03338619 | 712    | 720        | 0.01858534  | 2604285     | -0.00046122  | 2661690     | 0.06663763  | experimental | NINDS | 1500642 | Phenacetic acid               |
| 1921 M22 | X |        | 790    | 800        | -0.00612503 | 870    | 880        | 0.18484061  | 2501703     | -0.10138824  | 2327006     | -0.25012046 | experimental | NINDS | 1500909 | Protoveratrine a              |
| 1921 M23 | E |        | 148285 | 149440     | 0.10393519  | 203115 | 204200     | 212.996585  | 2474161     | -0.12844589  | 2578496     | -0.01210044 | empty        |       |         |                               |
| 1921 N01 | N |        | 515    | 520        | -0.19835122 | 436    | 440        | -0.27183526 | 2194017     | -0.40411026  | 2229687     | -0.34222699 | empty        |       |         |                               |
| 1921 N02 | E |        | 195    | 200        | -0.42203226 | 156    | 160        | -0.56646486 | 85284       | -2.47882258  | 82817       | -2.37410914 | empty        |       |         |                               |
| 1921 N03 | X |        | 713    | 720        | -0.05994836 | 472    | 480        | -0.23395431 | 2368868     | -0.23208018  | 2280078     | -0.29453497 | experimental | NINDS | 1501171 | Saccharin                     |
| 1921 N04 | X |        | 1232   | 1240       | 0.30283489  | 1433   | 1440       | 0.77725655  | 2522911     | -0.08052239  | 2603619     | 0.01167695  | experimental | NINDS | 1502223 | Resveratrol                   |
| 1921 N05 | X |        | 552    | 560        | -0.17248806 | 671    | 680        | -0.02455685 | 2426194     | -0.17567903  | 2241074     | -0.33144988 | experimental | NINDS | 1501172 | Acetobenzene                  |
| 1921 N06 | X |        | 440    | 450        | -0.25707588 | 469    | 480        | -0.23711106 | 2727431     | 0.12069800   | 2603212     | 0.01195426  | experimental | NINDS | 1502230 | Ascorbic acid                 |
| 1921 N07 | X |        | 673    | 680        | -0.08790853 | 433    | 440        | -0.27499201 | 338081      | -0.26237048  | 2737316     | -0.17332119 | experimental | NINDS | 1501173 | Acetaminosalol                |
| 1921 N08 | X |        | 872    | 880        | 0.05119333  | 834    | 840        | 0.14695966  | 3818480     | 1.19414489   | 4004925     | 1.33792803  | experimental | NINDS | 1502232 | Campothecin                   |
| 1921 N09 | X |        | 874    | 880        | 0.05259134  | 554    | 560        | -0.14766993 | 2261265     | -0.33794719  | 2461315     | -0.12300515 | experimental | NINDS | 1501174 | Todalazine hydrochloride      |
| 1921 N10 | X |        | 553    | 560        | -0.17178905 | 354    | 360        | -0.35811964 | 2888491     | 0.27915962   | 2756192     | 0.15607804  | experimental | NINDS | 1502234 | Abiscic acid (cis,trans; +/-) |
| 1921 N11 | X |        | 633    | 640        | -0.11586871 | 515    | 520        | -0.18870763 | 2361390     | -0.23943753  | 2341271     | -0.23661951 | experimental | NINDS | 1501175 | Flurandrenolide               |
| 1921 N12 | X |        | 631    | 640        | -0.11726671 | 432    | 440        | -0.27604426 | 2742309     | 0.13533601   | 2549170     | -0.03985572 | experimental | NINDS | 1502236 | Abrine (I)                    |
| 1921 N13 | X |        | 791    | 800        | -0.00542602 | 754    | 760        | 0.06277978  | 2425803     | -0.17606372  | 2533930     | -0.05427946 | experimental | NINDS | 1501176 | Hythromycin estolate          |
| 1921 N14 | X |        | 1112   | 1120       | 0.21895437  | 593    | 600        | -0.10663224 | 2715869     | 0.10932257   | 2769017     | 0.16821612  | experimental | NINDS | 1502237 | Harmol hydrochloride          |
| 1921 N15 | X |        | 511    | 520        | -0.20114723 | 513    | 520        | -0.19081212 | 2504309     | -0.09882428  | 2449621     | -0.13441353 | experimental | NINDS | 1501179 | Estradiol propionate          |
| 1921 N16 | X |        | 591    | 600        | -0.14522689 | 553    | 560        | -0.14872218 | 16644799    | 13.8135339   | 17413759    | 14.0285755  | experimental | NINDS | 1502242 | Scopoletin                    |
| 1921 N17 | X |        | 913    | 920        | 0.07985251  | 553    | 560        | -0.14872218 | 2481246     | -0.1215152   | 3202613     | -0.27320696 | experimental | NINDS | 1501180 | Estradiol diacetate           |
| 1921 N18 | X |        | 630    | 640        | -0.11796572 | 392    | 400        | -0.3181342  | 2598524     | -0.00612927  | 2868585     | 0.26245119  | experimental | NINDS | 1502244 | Amygdalin                     |
| 1921 N19 | X |        | 473    | 480        | -0.2277094  | 552    | 560        | -0.14977443 | 2362927     | -0.23792533  | 2369136     | -0.21024697 | experimental | NINDS | 1501181 | Estrone acetate               |
| 1921 N20 | X |        | 432    | 440        | -0.25636858 | 553    | 560        | -0.14872218 | 2774732     | 0.16723592   | 2596669     | 0.00509992  | experimental | NINDS | 1502245 | Ellagic acid                  |
| 1921 N21 | X |        | 751    | 760        | -0.00542602 | 712    | 720        | 0.01858534  | 2420467     | -0.18131364  | 2091819     | -0.47271068 | experimental | NINDS | 1501182 | Estradiol acetate             |
| 1921 N22 | X |        | 989    | 1000       | 0.13297684  | 748    | 760        | 0.05646629  | 2678945     | 0.07299428   | 2366874     | -0.21238782 | experimental | NINDS | 1501184 | Thiathione                    |
| 1921 N23 | E |        | 783    | 1400       | -0.01101806 | 770    | 1320       | 0.07961576  | 85503       | -2.47860711  | 85055       | -2.371991   | empty        |       |         |                               |
| 1921 N24 | P | 208595 | 209680 | 145.25047  | 184985      | 186320 | 193.919584 | 2212170     | -0.38625013 | 2164352      | -0.4040626  | 1775680     | -0.77191706  | empty |         |                               |
| 1921 O01 | N |        | 596    | 600        | -0.14173187 | 636    | 640        | -0.06138555 | 2012878     | -0.58232691  | 2369136     | -0.21024697 | experimental | NINDS | 1500644 | Phenylmercuric acetate        |
| 1921 O02 | E |        | 236    | 240        | -0.39337342 | 236    | 240        | -0.48228497 | 82081       | -2.4819739   | 83124       | -2.37381858 | empty        |       |         |                               |
| 1921 O03 | X |        | 275    | 280        | -0.36611226 | 195    | 200        | -0.52542717 | 1138719     | -1.44238289  | 1211596     | -1.30578833 | experimental | NINDS | 1500938 | Protoveratrine b              |
| 1921 O04 | X |        | 592    | 600        | -0.14452788 | 832    | 840        | -0.14485517 | 2287353     | -0.31228008  | 2073776     | -0.30049423 | experimental | NINDS | 1500645 | Pregnenolone                  |
| 1921 O05 | X |        | 553    | 560        | -0.17178905 | 550    | 560        | -0.15187893 | 2540782     | -0.06293971  | 2737516     | -0.13840234 | experimental | NINDS | 1500938 | Ginkgolide a                  |
| 1921 O06 | X |        | 553    | 560        | -0.17178905 | 872    | 880        | 0.18694511  | 2236801     | -0.362       |             |             |              |       |         |                               |

|          |   |        |        |            |             |        |            |             |             |             |             |             |              |       |         |  |
|----------|---|--------|--------|------------|-------------|--------|------------|-------------|-------------|-------------|-------------|-------------|--------------|-------|---------|--|
| 1921 P01 | N |        | 557    | 560        | -0.16899303 | 717    | 720        | 0.02384658  | 1845835     | -0.74667496 | 1832957     | -0.71770785 | empty        |       |         |  |
| 1921 P02 | E |        | 277    | 280        | -0.36471425 | 316    | 320        | -0.39810509 | 75844       | -2.48811028 | 79643       | -2.37711313 | empty        |       |         |  |
| 1921 P03 | X |        | 316    | 320        | -0.33745308 | 277    | 280        | -0.43914278 | 974814      | -1.60364358 | 997283      | -1.50862257 | experimental | NINDS | 1501185 |  |
| 1921 P04 | X |        | 594    | 680        | -0.08651552 | 594    | 680        | -0.10557999 | 270996      | -0.32837319 | 2052052     | -0.51042773 | experimental | NINDS | 1502252 |  |
| 1921 P05 | X |        | 834    | 840        | 0.02463117  | 993    | 1000       | 0.04863719  | 2044633     | -0.55108127 | 20921837    | -0.47221338 | experimental | NINDS | 1501187 |  |
| 1921 P06 | X |        | 834    | 840        | 0.02463117  | 1113   | 1120       | 0.44053701  | 2362896     | -0.23795583 | 2390373     | -0.19014744 | experimental | NINDS | 1502254 |  |
| 1921 P07 | X |        | 595    | 600        | -0.14243087 | 393    | 400        | -0.31708195 | 2287969     | -0.31167401 | 2193340     | -0.37662722 | experimental | NINDS | 300340  |  |
| 1921 P08 | X |        | 555    | 560        | -0.17039104 | 676    | 680        | -0.01929561 | 2362821     | -0.23802962 | 2456224     | -0.12782347 | experimental | NINDS | 1502255 |  |
| 1921 P09 | X |        | 675    | 680        | -0.08651052 | 595    | 600        | -0.10452774 | 2159451     | -0.43811886 | 2119033     | -0.44695428 | experimental | NINDS | 1501194 |  |
| 1921 P10 | X |        | 795    | 800        | -0.00263    | 395    | 400        | -0.31497745 | 2008527     | -0.58660771 | 2130250     | -0.43633807 | experimental | NINDS | 1502258 |  |
| 1921 P11 | X |        | 634    | 640        | -0.1151697  | 676    | 680        | -0.01929561 | 2206147     | -0.39217596 | 2133925     | -0.43285991 | experimental | NINDS | 1501195 |  |
| 1921 P12 | X |        | 594    | 600        | -0.14312987 | 555    | 560        | -0.14661768 | 2455601     | -0.14575259 | 2455459     | -0.12596372 | experimental | NINDS | 1502259 |  |
| 1921 P13 | X |        | 635    | 640        | -0.1144707  | 635    | 640        | -0.0624378  | 2129599     | -0.46748899 | 2079113     | -0.48473614 | experimental | NINDS | 1501198 |  |
| 1921 P14 | X |        | 435    | 440        | -0.25427156 | 635    | 640        | -0.0624378  | 2114722     | -0.48212598 | 2204486     | -0.36607821 | experimental | NINDS | 1502260 |  |
| 1921 P15 | X |        | 594    | 600        | -0.14312987 | 554    | 560        | -0.14766993 | 2113989     | -0.48284715 | 2059875     | -0.50294374 | experimental | NINDS | 1501199 |  |
| 1921 P16 | X |        | 754    | 760        | -0.03128918 | 754    | 760        | 0.06277978  | 2347708     | -0.25289888 | 2376824     | -0.20297075 | experimental | NINDS | 1503002 |  |
| 1921 P17 | X |        | 713    | 720        | -0.05994836 | 752    | 760        | 0.06067528  | 2089490     | -0.50695091 | 2242529     | -0.33007282 | experimental | NINDS | 1501200 |  |
| 1921 P18 | X |        | 1153   | 1160       | 0.24761355  | 1274   | 1280       | 0.60994903  | 1866147     | -0.72669066 | 1936759     | -0.61946556 | experimental | NINDS | 1503006 |  |
| 1921 P19 | X |        | 633    | 640        | -0.11586871 | 632    | 640        | -0.06559454 | 2200138     | -0.39808802 | 2231014     | -0.34097106 | experimental | NINDS | 1501201 |  |
| 1921 P20 | X |        | 633    | 640        | -0.11586871 | 794    | 800        | 0.10486972  | 2392600     | -0.20873105 | 2437482     | -0.14556163 | experimental | NINDS | 1503007 |  |
| 1921 P21 | X |        | 993    | 1000       | 0.1357285   | 714    | 720        | 0.02068984  | 2228281     | -0.37039905 | 1971758     | -0.58634113 | experimental | NINDS | 1501202 |  |
| 1921 P22 | X |        | 950    | 960        | 0.10571567  | 669    | 680        | -0.02666135 | 2266452     | -0.33284388 | 2101818     | -0.46324724 | experimental | NINDS | 1503009 |  |
| 1921 P23 | E |        | 919    | 1800       | 0.08404653  | 855    | 1640       | 0.16905688  | 81351       | -2.48269213 | 79734       | -2.37702701 | empty        |       |         |  |
| 1921 P24 | P | 301467 | 281    | 210        | 0.1684      | 267975 | 268720     | 281         | 245692      | 1883794     | -0.70932836 | 1889828     | -0.6638829   | empty |         |  |
| 1922 A01 | N |        | 557    | 560        | -0.19847568 | 717    | 720        | 0.11312098  | 1385635     | -2.41961886 | 1240735     | -2.68703507 | empty        |       |         |  |
| 1922 A02 | E |        | 240    | 240        | -0.69241628 | 717    | 720        | 0.11312098  | 787876      | -5.6253794  | 229827      | -5.77096495 | empty        |       |         |  |
| 1922 A03 | X |        | 635    | 640        | -0.07845261 | 636    | 640        | -0.04838743 | 1922300     | -1.10407106 | 1564692     | -0.82650549 | experimental | NINDS | 1503014 |  |
| 1922 A04 | X |        | 714    | 720        | 0.04310921  | 514    | 520        | -0.29163448 | 1534014     | -2.05589165 | 1887070     | -0.9683746  | experimental | NINDS | 1503029 |  |
| 1922 A05 | X |        | 634    | 640        | -0.07999137 | 835    | 840        | 0.34839755  | 1996423     | -0.92237047 | 2036085     | -0.57213088 | experimental | NINDS | 1503017 |  |
| 1922 A06 | X |        | 555    | 560        | -0.20155319 | 354    | 360        | -0.61065356 | 1830037     | -1.33023894 | 1633708     | -1.642086   | experimental | NINDS | 1503298 |  |
| 1922 A07 | X |        | 475    | 480        | -0.32465377 | 475    | 480        | -0.36939538 | 2142120     | -0.56521774 | 1765755     | -1.29096164 | experimental | NINDS | 1503036 |  |
| 1922 A08 | X |        | 675    | 680        | -0.01690232 | 835    | 840        | 0.34839755  | 1767760     | -1.48290098 | 1731460     | -1.38215501 | experimental | NINDS | 1503297 |  |
| 1922 A09 | X |        | 555    | 560        | -0.20155319 | 554    | 560        | -0.21787971 | 1849816     | -1.28175391 | 1925325     | -0.86665126 | experimental | NINDS | 1503038 |  |
| 1922 A10 | X |        | 635    | 640        | -0.07845261 | 595    | 600        | -0.07999137 | 803645      | -0.39489386 | 1971816     | -0.72468917 | experimental | NINDS | 1503041 |  |
| 1922 A11 | X |        | 635    | 640        | -0.07845261 | 595    | 600        | -0.13013107 | 1891470     | -1.17964584 | 1978186     | -0.72608931 | experimental | NINDS | 1503041 |  |
| 1922 A12 | X |        | 595    | 600        | -0.1400029  | 635    | 640        | -0.0503763  | 1808763     | -1.38238873 | 1766448     | -1.29390525 | experimental | NINDS | 1503322 |  |
| 1922 A13 | X |        | 516    | 520        | -0.26156472 | 514    | 520        | -0.29163448 | 2065594     | -0.7528089  | 1940055     | -0.82748292 | experimental | NINDS | 1503043 |  |
| 1922 A14 | X |        | 435    | 440        | -0.38620406 | 515    | 520        | -0.28964061 | 1721552     | -1.59617245 | 1760012     | -1.30623278 | experimental | NINDS | 1503324 |  |
| 1922 A15 | X |        | 475    | 480        | -0.32465377 | 635    | 640        | -0.0503763  | 1847440     | -1.28757829 | 1801674     | -1.19544993 | experimental | NINDS | 1503044 |  |
| 1922 A16 | X |        | 475    | 480        | -0.32465377 | 595    | 600        | -0.13013107 | 2049301     | -0.79274857 | 2197763     | -0.14221514 | experimental | NINDS | 1503330 |  |
| 1922 A17 | X |        | 554    | 560        | -0.20303074 | 554    | 560        | -0.20303074 | 2118737     | -0.637896   | 1872987     | -1.70026592 | experimental | NINDS | 1503345 |  |
| 1922 A18 | X |        | 1033   | 1040       | 0.53397276  | 994    | 1000       | 0.66542276  | 1740432     | -1.54989117 | 1608195     | -1.70992726 | experimental | NINDS | 1503341 |  |
| 1922 A19 | X |        | 751    | 760        | 0.10004322  | 632    | 640        | -0.05635791 | 2188373     | -0.45183596 | 2302687     | 0.13678682  | experimental | NINDS | 1503051 |  |
| 1922 A20 | X |        | 995    | 1000       | 0.47549998  | 874    | 880        | 0.42615845  | 1863308     | -1.24868045 | 1961606     | -0.77017696 | experimental | NINDS | 1503339 |  |
| 1922 A21 | X |        | 632    | 640        | -0.08306889 | 712    | 720        | 0.10315163  | 2165493     | -0.50792259 | 1847052     | -1.07478592 | experimental | NINDS | 1503053 |  |
| 1922 A22 | P | 1071   | 1080   | 0.59244553 | 1232        | 1240   | 1.13996364 | 1991141     | -0.93531844 | 2057479     | -0.51524239 | 1908758     | empty        |       |         |  |
| 1922 A23 | E |        | 766    | 1480       | 0.12312458  | 502    | 1160       | 0.31556091  | 80399       | -5.61919467 | 81027       | -5.77079858 | empty        |       |         |  |
| 1922 A24 | P | 243911 | 245200 | 374        | 264248      | 224212 | 224760     | 445         | 732929      | 1980162     | 0.96223169  | 1818445     | -1.15085439  | empty |         |  |
| 1922 B0  | N |        | 676    | 680        | -0.01536587 | 756    | 760        | 0.19088188  | 2011906     | -0.88441639 | 2190015     | -0.7015733  | empty        |       |         |  |
| 1922 B02 | E |        | 194    | 200        | -0.75704455 | 115    | 120        | -1.08718831 | 89112       | -5.59783616 | 86502       | -5.75624009 | empty        |       |         |  |
| 1922 B03 | X |        | 794    | 800        | 0.16620978  | 554    | 560        | -0.21187971 | 2233132     | -0.34211648 | 2299119     | 0.1272992   | experimental | NINDS | 1504027 |  |
| 1922 B04 | X |        | 632    | 640        | -0.08306889 | 713    | 720        | -0.37338312 | 2677947     | 0.74827584  | 2405249     | 0.40950801  | experimental | NINDS | 1505281 |  |
| 1922 B05 | X |        | 633    | 640        | -0.08153013 | 473    | 480        | -0.1051455  | 2175505     | -0.48337979 | 2166209     | -0.22659858 | experimental | NINDS | 1504030 |  |
| 1922 B06 | X |        | 674    | 680        | -0.01844108 | 593    | 600        | -0.13411881 | 2695136     | 0.79041191  | 2514697     | 0.70053968  | experimental | NINDS | 1505294 |  |
| 1922 B07 | X |        | 473    | 480        | -0.32773128 | 674    | 680        | 0.0273846   | 2382941     | 0.02511615  | 2339763     | 0.23537509  | experimental | NINDS | 1504074 |  |
| 1922 B08 | X |        | 713    | 720        | 0.04157045  | 592    | 600        | -0.13611268 | 2397897     | 0.06177838  | 2797292     | 1.45198413  | experimental | NINDS | 1505296 |  |
| 1922 B09 | X |        | 553    | 560        | -0.20463071 | 474    | 480        | -0.37138925 | 2029632     | -0.84096395 | 2529806     | 0.74071581  | experimental | NINDS | 1504078 |  |
| 1922 B10 | X |        | 834    | 840        | 0.22776007  | 634    | 640        | -0.05237017 | 2790573     | 1.02436034  | 2698187     | 1.1884554   | experimental | NINDS | 1505299 |  |
| 1922 B11 | X |        | 432    | 440        | -0.39082033 | 513    | 520        | -0.29362835 | 2307752     | -0.15919757 | 2047187     | -0.5426097  | experimental | NINDS | 1504085 |  |
| 1922 B12 | X |        | 635    | 640        | -0.07845261 | 593    | 600        | -0.13411881 | 2521116     | 0.36382991  | 2221596     | -0.07884114 | experimental | NINDS | 1505304 |  |
| 1922 B13 | X |        | 274    | 280        | -0.63394397 | 794    | 800        | 0.26664891  | 2227271     | -0.35648378 | 2220629     | -0.08236975 | experimental | NINDS | 1504088 |  |
| 1922 B14 | X |        | 834    | 840        | 0.22776007  | 512    | 520        | -0.29562222 | 2513599     | 0.34540319  | 1984336     | -0.70973593 | experimental | NINDS | 1505305 |  |
| 1922 B15 | X |        | 633    | 640        | -0.08153013 | 594    | 600        | -0.13212494 | 2126454     | -0.60362041 | 1822769     | -1.13056551 | experimental | NINDS | 1504094 |  |
| 1922 B16 | X |        | 512    | 520        | -0.26771975 | 590    | 600        | -0.14010042 | 2339858     | -0.08049488 | 2234953     | -0.04332373 | experimental | NINDS | 1505306 |  |
| 1922 B17 | X |        | 592    | 600        | -0.14461917 | 552    | 560        | -0.21586745 | 2404388     | 0.07769002  | 2180357     | -0.1884992  | experimental | NINDS | 1504098 |  |
| 1922 B18 | X |        | 1030   | 1040       | 0.52935649  | 911    | 920        | 0.49993161  | 2034448     | -0.8291583  | 1801703     | -1.19537281 | experimental | NINDS | 1505309 |  |
| 1922 B19 | X |        | 912    | 920        | 0.34778314  | 992    | 1000       | 0.66143502  | 2169455     | -0.49821039 | 2050280     | -0.53438515 | experimental | NINDS | 1504099 |  |
| 1922 B20 | X |        | 471    | 480        | -0.3308088  | 590    | 600        | -0.14010042 | 2376044     | 0.00820927  | 2261255     | 0.02661556  | experimental | NINDS | 1505310 |  |
| 1922 B21 | X |        | 552    | 560        | -0.20616946 | 512    | 520        | -0.29562222 | 1389376     | -2.41044841 | 1316319     | -2.4860507  | experimental | NINDS | 1503223 |  |
| 1922 B22 | X |        | 870    | 880        | 0.28315533  | 674    | 680        | 0.25867343  | 2277155     | -0.23420119 | 2187257     | -0.17015115 | experimental | NINDS | 1505312 |  |
| 1922 B23 | X |        | 546    | 1160       | -0.15402021 | 686    | 1240       | 0.05131103  | 85050       | -5.6042268  | 2017775     | -5.73690055 | empty        |       |         |  |
| 1922 B24 | P | 207734 | 208920 | 218        | 596628      | 187018 | 188080     | 371         | 572956      | 1992924     | -0.9309477  | 1633546     | -1.64251677  | empty |         |  |
| 1922 C01 | N |        | 556    | 560        | -0.20001443 | 556    | 560        | -0.20789197 | 1923070     | -1.10218353 | 1789400     | -1.22808755 | empty        |       |         |  |
| 1922 C02 | E |        | 275    | 280        | -0.63240521 | 155    | 160        | -1.00743354 | 88622       | -5.59903731 | 86616       | -5.75593695 | empty        |       |         |  |
| 1922 C03 | X |        | 674    | 680        | -0.01844108 | 755    | 760        | 0.18888801  | 2288561     | -0.20624122 | 2108523     | -0.379511   |              |       |         |  |

|          |   |        |        |             |        |        |             |         |             |         |             |              |       |         |                                   |
|----------|---|--------|--------|-------------|--------|--------|-------------|---------|-------------|---------|-------------|--------------|-------|---------|-----------------------------------|
| 1922 C19 | X | 471    | 480    | -0.3308088  | 631    | 640    | -0.05835178 | 2133071 | -0.58739991 | 2435449 | 0.48981241  | experimental | NINDS | 1503080 | Ambroxol hydrochloride            |
| 1922 C20 | X | 671    | 680    | -0.02305735 | 953    | 960    | 0.58367412  | 2240420 | -0.32425112 | 2208632 | -0.11331354 | experimental | NINDS | 1503432 | Mepartricin                       |
| 1922 C21 | X | 792    | 800    | 0.16313227  | 592    | 600    | -0.13611268 | 2441671 | 0.16908329  | 2230540 | -0.05505828 | experimental | NINDS | 1503083 | Amprilose                         |
| 1922 C22 | X | 510    | 520    | -0.27079727 | 550    | 560    | -0.21985519 | 1212856 | -0.59844319 | 1973587 | -0.73831845 | experimental | NINDS | 1503500 | Resorcinol monoacetate            |
| 1922 C23 | E | 478    | 480    | -0.20037275 | 744    | 1160   | 0.16699545  | 87888   | -5.00836676 | 878802  | -5.74486602 | empty        |       |         |                                   |
| 1922 C24 | P | 163193 | 164120 | 250.058843  | 139826 | 140800 | 277.478279  | 2305557 | -0.16457826 | 1966016 | -0.75845039 | empty        |       |         |                                   |
| 1922 D01 | N | 396    | 400    | -0.44621559 | 556    | 560    | -0.20789197 | 2189437 | -0.44922774 | 2145876 | -0.28018715 | empty        |       |         |                                   |
| 1922 D02 | E | 236    | 240    | -0.69241674 | 156    | 160    | -1.00543967 | 92312   | -5.58999187 | 90131   | -5.74659026 | empty        |       |         |                                   |
| 1922 D03 | X | 554    | 560    | -0.44915015 | 435    | 440    | -0.44915015 | 2374180 | 0.00363997  | 2263765 | 0.03328986  | experimental | NINDS | 1504105 | Tannic acid                       |
| 1922 D04 | X | 394    | 400    | -0.4492931  | 394    | 400    | -0.53089879 | 2616217 | 0.59695469  | 2491752 | 0.63952694  | experimental | NINDS | 1505314 | Saralfoxacin hydrochloride        |
| 1922 D05 | X | 354    | 360    | -0.51084339 | 675    | 680    | 0.02937847  | 2275448 | -0.23838562 | 2312247 | 0.16220768  | experimental | NINDS | 1504116 | Formestane                        |
| 1922 D06 | X | 519    | 520    | -0.26156472 | 513    | 520    | -0.29362835 | 2534378 | 0.39633956  | 2599805 | 0.92700873  | experimental | NINDS | 1505316 | Protibionamide                    |
| 1922 D07 | X | 314    | 320    | -0.57239368 | 594    | 600    | -0.13212494 | 2348392 | -0.05957516 | 2562404 | 0.8273967   | experimental | NINDS | 1504136 | Alaproclate                       |
| 1922 D08 | X | 673    | 680    | -0.01997984 | 833    | 840    | 0.34440981  | 2210752 | -0.39697745 | 2502576 | 0.66830889  | experimental | NINDS | 1505317 | Carmofur                          |
| 1922 D09 | X | 874    | 880    | 0.28931036  | 554    | 560    | -0.21187971 | 2671010 | 0.7312709   | 2263836 | 0.03347866  | experimental | NINDS | 1504137 | Ancitabine hydrochloride          |
| 1922 D10 | X | 673    | 680    | -0.01997984 | 474    | 480    | -0.37138925 | 2769904 | 0.97369361  | 2621031 | 0.98329095  | experimental | NINDS | 1505319 | Clopidol                          |
| 1922 D11 | X | 514    | 520    | -0.26464224 | 554    | 560    | -0.21187971 | 2617878 | 0.60102636  | 2837533 | 1.55898842  | experimental | NINDS | 1504142 | Acetriazoic acid                  |
| 1922 D12 | X | 554    | 560    | -0.20309195 | 394    | 400    | -0.53089879 | 2532130 | 0.39082895  | 2684015 | 1.15077083  | experimental | NINDS | 1505323 | Carbimazole                       |
| 1922 D13 | X | 634    | 640    | -0.07999137 | 594    | 600    | -0.13212494 | 2388392 | 0.0384784   | 2383490 | 0.35164896  | experimental | NINDS | 1504144 | Dithromycin                       |
| 1922 D14 | X | 592    | 600    | -0.14461917 | 913    | 920    | 0.50391935  | 2011834 | -0.88459288 | 1711301 | -1.43575952 | experimental | NINDS | 1505327 | Chlormadinone acetate             |
| 1922 D15 | X | 874    | 880    | 0.28931036  | 633    | 640    | -0.05436404 | 2551101 | 0.4373333   | 2675490 | 1.12810212  | experimental | NINDS | 1504145 | Gliclazide                        |
| 1922 D16 | X | 631    | 640    | -0.08460764 | 470    | 480    | -0.37936473 | 2740315 | 0.90116095  | 2587476 | 0.89406531  | experimental | NINDS | 1505329 | Miltefosine                       |
| 1922 D17 | X | 713    | 720    | 0.04157045  | 633    | 640    | -0.05436404 | 2057446 | -0.77278241 | 2419398 | 0.44713142  | experimental | NINDS | 1504148 | Mepivacaine hydrochloride         |
| 1922 D18 | X | 552    | 560    | -0.20616946 | 632    | 640    | -0.05635791 | 2471441 | 0.24205965  | 2090341 | -0.42789565 | experimental | NINDS | 1505330 | Oxiconazole nitrate               |
| 1922 D19 | X | 832    | 840    | 0.22468256  | 633    | 640    | -0.05436404 | 2113880 | -0.63444355 | 2328225 | 0.20469456  | experimental | NINDS | 1504150 | Meloxicam                         |
| 1922 D20 | X | 1200   | 1200   | 0.77779864  | 432    | 440    | -0.51512176 | 2801975 | 1.05231051  | 2583201 | 0.28440383  | experimental | NINDS | 1505332 | Azaperone                         |
| 1922 D21 | X | 890    | 840    | 0.22160504  | 593    | 600    | -0.1341186  | 2248413 | -0.30465757 | 2350003 | 0.84953613  | experimental | NINDS | 1505334 | Nimustine                         |
| 1922 D22 | X | 792    | 800    | 0.16313227  | 751    | 760    | 0.18091253  | 2453178 | 0.19729084  | 2054852 | -0.52222781 | experimental | NINDS | 1505334 | Securinine                        |
| 1922 D23 | E | 232    | 560    | -0.69857177 | 566    | 1000   | -0.18795328 | 90165   | -5.5925249  | 91710   | -5.74239157 | empty        |       |         |                                   |
| 1922 D24 | P | 109472 | 110400 | 167.395267  | 146265 | 147120 | 290.316803  | 2071101 | -0.73930938 | 2204076 | -0.12542833 | empty        |       |         |                                   |
| 1922 E01 | N | 477    | 480    | -0.32157625 | 636    | 640    | -0.04838243 | 1967747 | -0.99266506 | 1825220 | -1.13283909 | empty        |       |         |                                   |
| 1922 E02 | E | 196    | 200    | -0.75396703 | 196    | 200    | -0.9256849  | 91697   | -5.59149945 | 89991   | -5.74696254 | empty        |       |         |                                   |
| 1922 E03 | X | 635    | 640    | -0.07845261 | 514    | 520    | -0.29163448 | 2481198 | 0.26597736  | 2301195 | 0.13281946  | experimental | NINDS | 1503085 | Pyrrithylidone                    |
| 1922 E04 | X | 473    | 480    | -0.26464224 | 832    | 840    | 0.34440981  | 2209858 | -0.70464224 | 2502576 | 0.66830889  | experimental | NINDS | 1503600 | Triflurometholone                 |
| 1922 E05 | X | 555    | 560    | -0.20155319 | 354    | 360    | -0.10653556 | 3040044 | 1.63589831  | 2129571 | -0.32354355 | experimental | NINDS | 1503086 | Tigrid hydrochloride              |
| 1922 E06 | X | 354    | 360    | -0.51084339 | 475    | 480    | -0.36939538 | 2433412 | 0.14883768  | 1979426 | -0.72279204 | experimental | NINDS | 1503602 | Salinomycin, sodium               |
| 1922 E07 | X | 395    | 400    | -0.44775435 | 435    | 440    | -0.44915015 | 2643750 | 0.6644474   | 2245546 | -0.01515603 | experimental | NINDS | 1503092 | Gluconalactone                    |
| 1922 E08 | X | 594    | 600    | -0.14154166 | 434    | 440    | -0.45114402 | 2422096 | 0.12109833  | 2069600 | -0.48444751 | experimental | NINDS | 1503603 | Acyclovir                         |
| 1922 E09 | X | 473    | 480    | -0.32773128 | 354    | 360    | -0.10653556 | 2205359 | -0.41019752 | 2300296 | 0.13042894  | experimental | NINDS | 1503094 | Toloxone                          |
| 1922 E10 | X | 474    | 480    | -0.32619253 | 595    | 600    | -0.13013107 | 2209017 | -0.40123052 | 2138607 | -0.29951604 | experimental | NINDS | 1503604 | Retinyl palmitate                 |
| 1922 E11 | X | 474    | 480    | -0.32619253 | 595    | 600    | -0.13013107 | 2209017 | -0.40123052 | 2138607 | -0.29951604 | experimental | NINDS | 1503604 | Retinyl palmitate                 |
| 1922 E12 | X | 552    | 560    | -0.20616946 | 613    | 520    | -0.28964061 | 2063080 | -0.75897157 | 1910113 | -0.90710128 | experimental | NINDS | 1503607 | Thalidomide                       |
| 1922 E13 | X | 752    | 760    | 0.10158198  | 513    | 520    | -0.29362835 | 2170945 | -0.49455789 | 2414667 | 0.43455129  | experimental | NINDS | 1503101 | Azlocillin sodium                 |
| 1922 E14 | X | 593    | 600    | -0.14308042 | 553    | 560    | -0.21387358 | 1634989 | -1.8083677  | 1522393 | -1.93808218 | experimental | NINDS | 1503610 | Benzalkonium chloride             |
| 1922 E15 | X | 472    | 480    | -0.32927004 | 434    | 440    | -0.45114402 | 2142463 | -0.56437693 | 2343165 | 0.24442131  | experimental | NINDS | 1503104 | Bendroflumethiazide               |
| 1922 E16 | X | 513    | 520    | -0.26618099 | 433    | 440    | -0.45313789 | 2079119 | -0.71965454 | 2527110 | 0.73354691  | experimental | NINDS | 1503611 | Pentoxifylline                    |
| 1922 E17 | X | 633    | 640    | -0.08153013 | 753    | 760    | 0.18490027  | 2225528 | -0.36132027 | 2500292 | 0.66223554  | experimental | NINDS | 1503106 | Bepiridil hydrochloride           |
| 1922 E18 | X | 473    | 480    | -0.32773128 | 832    | 840    | 0.34440981  | 2158770 | -0.52195161 | 2304236 | 0.14090574  | experimental | NINDS | 1503616 | Fluoroxacin                       |
| 1922 E19 | X | 632    | 640    | -0.08306889 | 551    | 560    | -0.21786132 | 2798694 | 0.04426767  | 2749317 | 0.2244065   | experimental | NINDS | 1503107 | Bromhexine hydrochloride          |
| 1922 E20 | X | 751    | 760    | 0.10004322  | 673    | 680    | 0.02539073  | 2549729 | 0.43397007  | 2433675 | 0.48509552  | experimental | NINDS | 1503428 | Choline chloride                  |
| 1922 E21 | X | 591    | 600    | -0.14615793 | 711    | 720    | 0.10115776  | 2664150 | 0.71445472  | 2463133 | 0.56342656  | experimental | NINDS | 1503108 | Bromopride                        |
| 1922 E22 | X | 991    | 1000   | 0.46934496  | 951    | 960    | 0.57968638  | 2192545 | -0.44160897 | 2147167 | -0.27675427 | experimental | NINDS | 1503620 | Safrole                           |
| 1922 E23 | E | 502    | 960    | -0.28310732 | 547    | 1000   | -0.2258368  | 91002   | -5.59320313 | 90342   | -5.7460292  | empty        |       |         |                                   |
| 1922 E24 | P | 154984 | 155800 | 237.427185  | 152790 | 153600 | 303.3268    | 2589809 | 0.53221973  | 2196985 | -0.14428391 | empty        |       |         |                                   |
| 1922 F01 | N | 516    | 520    | -0.26156472 | 556    | 560    | -0.20789197 | 2455457 | 0.20287744  | 2296225 | 0.11963038  | empty        |       |         |                                   |
| 1922 F02 | E | 155    | 160    | -0.81705608 | 195    | 200    | -0.92767877 | 88330   | -5.59975311 | 90254   | -5.7462632  | empty        |       |         |                                   |
| 1922 F03 | X | 473    | 480    | -0.32773128 | 715    | 720    | 0.10913324  | 2270382 | -0.25080411 | 2190207 | -0.1623072  | experimental | NINDS | 1504152 | Nilutamide                        |
| 1922 F04 | X | 634    | 640    | -0.07999137 | 474    | 480    | -0.37138925 | 1847579 | -1.28723756 | 1668391 | -1.54986091 | experimental | NINDS | 1505340 | Azelastine hydrochloride          |
| 1922 F05 | X | 513    | 520    | -0.26618099 | 434    | 440    | -0.45114402 | 2353761 | -0.04641392 | 2432959 | 0.48319129  | experimental | NINDS | 1504171 | Venlafaxine                       |
| 1922 F06 | X | 514    | 520    | -0.26464224 | 555    | 560    | -0.20988584 | 3181663 | 1.98305448  | 2772647 | 1.38645096  | experimental | NINDS | 1505347 | Riboflavin                        |
| 1922 F07 | X | 594    | 600    | -0.14154166 | 355    | 360    | -0.60865969 | 2416430 | 0.10720904  | 2130616 | -0.3207648  | experimental | NINDS | 1504173 | Fluoxetine                        |
| 1922 F08 | X | 514    | 520    | -0.26464224 | 475    | 480    | -0.36939538 | 2692278 | 0.78340598  | 2589560 | 0.89960684  | experimental | NINDS | 1505354 | Fipronil                          |
| 1922 F09 | X | 474    | 480    | -0.32619253 | 554    | 560    | -0.21187971 | 2607033 | 0.57444159  | 2304236 | 0.14090574  | experimental | NINDS | 1504174 | Bupropion                         |
| 1922 F10 | X | 512    | 520    | -0.26771925 | 510    | 520    | -0.29960996 | 2868658 | 1.26038751  | 2722103 | 1.2520501   | experimental | NINDS | 1505360 | Cefditoren pivoxil                |
| 1922 F11 | X | 673    | 680    | -0.01997984 | 754    | 760    | 0.18689414  | 2661986 | 0.70915002  | 2185927 | -0.17368809 | experimental | NINDS | 1504183 | Trifluridine                      |
| 1922 F12 | X | 872    | 880    | 0.28623285  | 733    | 440    | -0.45313789 | 2818976 | 1.09398572  | 2719155 | 1.24421112  | experimental | NINDS | 1505361 | Mofetilol                         |
| 1922 F13 | X | 792    | 800    | 0.16313227  | 414    | 720    | 0.10713937  | 2526704 | 0.37752799  | 2526945 | 0.73310816  | experimental | NINDS | 1504184 | Aminolevulinic acid hydrochloride |
| 1922 F14 | X | 433    | 440    | -0.38928157 | 514    | 520    | -0.29163448 | 2999808 | 1.53726624  | 2653541 | 1.02134247  | experimental | NINDS | 1505365 | Ceftriaxone sodium trihydrate     |
| 1922 F15 | X | 594    | 600    | -0.14154166 | 434    | 440    | -0.45114402 | 2287023 | -0.21001138 | 2519563 | 0.71347879  | experimental | NINDS | 1504188 | Prenperone                        |
| 1922 F16 | X | 632    | 640    | -0.08306889 | 674    | 680    | 0.02723846  | 2721717 | 0.85557085  | 2522373 | 0.72095082  | experimental | NINDS | 1505366 | Ranitidine                        |
| 1922 F17 | X | 632    | 640    | -0.08153013 | 512    | 520    | -0.29222232 | 2647708 | 0.67414985  | 2431748 | 0.47997114  | experimental | NINDS | 1504190 | Axobenzon                         |
| 1922 F18 | X | 593    | 600    | -0.14308042 | 711    | 720    | 0.10115776  | 2812342 | 1.0772354   | 2614361 | 0.96555484  | experimental | NINDS | 270029  | Prasterone acetate                |
| 1922 F19 | X | 553    | 560    | -0.20463071 | 1072   | 1080   | 0.82094456  | 1993199 | -0.93027358 | 1896896 |             |              |       |         |                                   |

|          |   |        |        |             |        |        |             |         |             |         |             |              |       |         |                                                        |
|----------|---|--------|--------|-------------|--------|--------|-------------|---------|-------------|---------|-------------|--------------|-------|---------|--------------------------------------------------------|
| 1922 G13 | X | 593    | 600    | -0.14308042 | 593    | 600    | -0.13411881 | 2575392 | 0.49687878  | 2367238 | 0.30843349  | experimental | NINDS | 1503134 | Menthyl(-)                                             |
| 1922 G14 | X | 434    | 440    | -0.38774281 | 354    | 360    | -0.61065356 | 2211722 | -0.39459965 | 2251661 | 0.00110428  | experimental | NINDS | 1503678 | Celecoxib                                              |
| 1922 G15 | X | 553    | 560    | -0.20463071 | 353    | 360    | -0.61264743 | 2205949 | -0.40875123 | 2205946 | -0.12045584 | experimental | NINDS | 1503118 | Trifluopromazine hydrochloride                         |
| 1922 G16 | X | 513    | 520    | -0.26618099 | 634    | 640    | -0.05237017 | 2549922 | 0.43444318  | 2489765 | 0.63866631  | experimental | NINDS | 1503710 | Clotapdogrel sulfate                                   |
| 1922 G17 | X | 553    | 560    | -0.20463071 | 633    | 640    | -0.05436404 | 2230700 | -0.34807814 | 2460598 | 0.5566644   | experimental | NINDS | 1503135 | Thonzylamine hydrochloride                             |
| 1922 G18 | X | 673    | 680    | -0.01997984 | 673    | 680    | 0.02539073  | 2536257 | 0.40094563  | 2367656 | 0.30954499  | experimental | NINDS | 1503720 | Selametinol                                            |
| 1922 G19 | X | 512    | 520    | -0.26771975 | 791    | 800    | 0.2606673   | 2987023 | 1.50592587  | 2650847 | 1.06257426  | experimental | NINDS | 1503136 | Thiamphenicol                                          |
| 1922 G20 | X | 872    | 880    | 0.28623285  | 832    | 840    | 0.34241594  | 2418469 | 0.11220732  | 2470293 | 0.58246561  | experimental | NINDS | 1503722 | Atorvastatin calcium                                   |
| 1922 G21 | X | 551    | 560    | -0.20770822 | 750    | 760    | 0.17891866  | 1265148 | -2.71497334 | 1406199 | -2.24705203 | experimental | NINDS | 1503200 | Cetrimonium bromide                                    |
| 1922 G22 | X | 1070   | 1080   | 0.59090678  | 830    | 840    | 0.3384282   | 2227474 | -0.35598616 | 2336639 | 0.22706811  | experimental | NINDS | 1503801 | Naproxol                                               |
| 1922 G23 | E | 542    | 1240   | -0.22155703 | 638    | 1120   | -0.0443947  | 89396   | -5.59713998 | 91390   | -5.74324427 | empty        |       |         |                                                        |
| 1922 G24 | P | 237156 | 238000 | 363.869944  | 16305  | 163960 | 324.092948  | 2669811 | 0.72833175  | 236125  | 0.29430576  | empty        |       |         |                                                        |
| 1922 H01 | N | 397    | 400    | -0.44467683 | 396    | 400    | -0.52691105 | 2253494 | -0.29220232 | 2198357 | -0.14063365 | empty        |       |         |                                                        |
| 1922 H02 | E | 165    | 200    | -0.80166851 | 373    | 400    | -0.57277005 | 89239   | -5.59752484 | 90671   | -5.74515436 | empty        |       |         |                                                        |
| 1922 H03 | X | 11154  | 11160  | -16.1077345 | 8394   | 8400   | 15.4200552  | 2318864 | -0.13195829 | 2310449 | 0.15742664  | experimental | NINDS | 1504218 | Acrisorcin                                             |
| 1922 H04 | X | 482    | 520    | -0.31388247 | 651    | 680    | -0.01847439 | 2707166 | 0.81990151  | 2473704 | 0.59153576  | experimental | NINDS | 1505371 | Cetirizine hydrochloride                               |
| 1922 H05 | X | 793    | 800    | 0.16467103  | 594    | 600    | -0.13212494 | 2141166 | -0.56755632 | 2126597 | -0.33145167 | experimental | NINDS | 1504226 | Mercaptamine hydrochloride                             |
| 1922 H06 | X | 673    | 680    | -0.01997984 | 434    | 440    | -0.45114402 | 2682042 | 0.75831407  | 2584481 | 0.88610135  | experimental | NINDS | 1505801 | Topiramate                                             |
| 1922 H07 | X | 473    | 480    | -0.32773128 | 475    | 480    | -0.36939538 | 2815095 | 1.08447207  | 2767941 | 1.3739373   | experimental | NINDS | 1504229 | Metaxalone                                             |
| 1922 H08 | X | 627    | 640    | -0.09076267 | 473    | 480    | -0.37338312 | 2636894 | 0.64746102  | 2555957 | 0.81025357  | experimental | NINDS | 1505802 | Gemifloxacin mesylate                                  |
| 1922 H09 | X | 433    | 440    | -0.38928157 | 471    | 480    | -0.37737086 | 2615335 | 0.59479261  | 2615762 | 0.96928022  | experimental | NINDS | 1504231 | Clarithromycin                                         |
| 1922 H10 | X | 592    | 600    | -0.14461917 | 1070   | 1080   | 0.81695682  | 2862480 | 1.20062877  | 2549814 | 0.79391881  | experimental | NINDS | 1505803 | Pravastatin sodium                                     |
| 1922 H11 | X | 554    | 560    | -0.20309195 | 673    | 680    | 0.02539073  | 2749512 | 0.92370591  | 2619132 | 0.97824134  | experimental | NINDS | 1504235 | Rofecoxib                                              |
| 1922 H12 | X | 633    | 640    | -0.08153013 | 473    | 480    | -0.37338312 | 2699225 | 0.80215137  | 2419253 | 0.44674585  | experimental | NINDS | 1505805 | Gabapentin                                             |
| 1922 H13 | X | 553    | 560    | -0.20463071 | 674    | 680    | 0.0273846   | 2568254 | 0.47938112  | 2597086 | 0.91961913  | experimental | NINDS | 1504236 | Simvastatin                                            |
| 1922 H14 | X | 553    | 560    | -0.20463071 | 594    | 600    | -0.05237017 | 2797842 | 1.04217912  | 2259920 | 1.50417245  | experimental | NINDS | 1505811 | Levodopa hydrochloride                                 |
| 1922 H15 | X | 873    | 880    | -0.32777716 | 1074   | 1080   | 0.8249323   | 2208669 | -0.39828573 | 2053723 | -0.52669241 | experimental | NINDS | 1505812 | Hydroquinone                                           |
| 1922 H16 | X | 673    | 680    | -0.01997984 | 552    | 560    | -0.21586745 | 2605163 | 0.56985759  | 2626785 | 0.99859133  | experimental | NINDS | 1505816 | Pregabalin                                             |
| 1922 H17 | X | 472    | 480    | -0.32927004 | 513    | 520    | -0.29362835 | 2377468 | 0.01169997  | 2296538 | 0.12043609  | experimental | NINDS | 1504243 | Oxcarbazepine                                          |
| 1922 H18 | X | 633    | 640    | -0.08153013 | 393    | 400    | -0.53289266 | 2582843 | 0.5151437   | 2721627 | 1.25078438  | experimental | NINDS | 1505817 | Ramelteon                                              |
| 1922 H19 | X | 712    | 720    | 0.04003169  | 673    | 680    | 0.02539073  | 2417462 | 0.10973882  | 2542345 | 0.77405809  | experimental | NINDS | 1504244 | Betamipron                                             |
| 1922 H20 | X | 911    | 920    | 0.34624438  | 511    | 520    | -0.29761609 | 2449289 | 0.18775759  | 2533149 | 0.74960513  | experimental | NINDS | 1505818 | Pantoprazole                                           |
| 1922 H21 | X | 591    | 600    | -0.14615793 | 952    | 960    | 0.58168025  | 2191734 | -0.44359701 | 2099339 | -0.40393304 | experimental | NINDS | 1504257 | Carvedilol tartrate                                    |
| 1922 H22 | E | 840    | 840    | 0.22160504  | 791    | 800    | 0.22160504  | 2873608 | 0.44359701  | 2323252 | 1.44359701  | experimental | NINDS | 1504250 | Topotecan hydrochloride                                |
| 1922 H23 | E | 684    | 1040   | -0.00305351 | 580    | 760    | -0.55881296 | 91143   | -5.59285749 | 91312   | -5.74344988 | empty        |       |         |                                                        |
| 1922 H24 | P | 118669 | 119800 | 181.547217  | 127266 | 128160 | 252.435281  | 2263850 | -0.26681625 | 2057405 | -0.51543916 | empty        |       |         |                                                        |
| 1922 I01 | N | 316    | 320    | -0.56931617 | 556    | 560    | -0.20789197 | 2042350 | -0.80978782 | 1918420 | -0.88501225 | empty        |       |         |                                                        |
| 1922 I02 | E | 236    | 240    | -0.69241674 | 195    | 200    | -0.92767877 | 90294   | -5.59493868 | 88281   | -5.75150957 | empty        |       |         |                                                        |
| 1922 I03 | X | 484    | 520    | -0.31080495 | 572    | 600    | -0.17599007 | 2366372 | -0.01550008 | 1977494 | -0.72792924 | experimental | NINDS | 1503203 | Chlorprothixene hydrochloride                          |
| 1922 I04 | X | 514    | 520    | -0.26464224 | 553    | 560    | -0.21387358 | 2542015 | 0.41506044  | 2192914 | -0.15510905 | experimental | NINDS | 1503802 | Azadirachtin                                           |
| 1922 I05 | X | 514    | 520    | -0.14308042 | 594    | 600    | -0.13212494 | 2187971 | 0.8067103   | 2734420 | 0.02803287  | experimental | NINDS | 1503204 | Cinacalcin                                             |
| 1922 I06 | X | 473    | 480    | -0.32773128 | 634    | 640    | -0.05237017 | 2792389 | 1.02881197  | 2356856 | 0.28082685  | experimental | NINDS | 1503804 | Cetuximab                                              |
| 1922 I07 | X | 547    | 560    | -0.21386325 | 473    | 480    | -0.37338312 | 2670524 | 0.73007955  | 2461275 | 0.55848597  | experimental | NINDS | 1503205 | Citilone                                               |
| 1922 I08 | X | 2913   | 2920   | 3.42683633  | 874    | 880    | 0.42615845  | 2246855 | -0.30847676 | 2167694 | -0.22217121 | experimental | NINDS | 1503806 | Homidium bromide                                       |
| 1922 I09 | X | 507    | 520    | -0.27541354 | 673    | 680    | 0.02539073  | 2517503 | 0.35497322  | 2281912 | 0.08154443  | experimental | NINDS | 1503206 | Clofocet                                               |
| 1922 I10 | X | 634    | 640    | -0.07999137 | 712    | 720    | 0.10315163  | 2512383 | 0.34242236  | 2477896 | 0.60268265  | experimental | NINDS | 1503816 | Amcinonide                                             |
| 1922 I11 | X | 433    | 440    | -0.38928157 | 513    | 520    | -0.29362835 | 2669485 | 0.72753261  | 2239257 | -0.03187902 | experimental | NINDS | 1503207 | Cyclobenzaprine hydrochloride                          |
| 1922 I12 | X | 514    | 520    | -0.26464224 | 594    | 600    | -0.13212494 | 2378878 | 0.01515636  | 2237951 | 0.32948266  | experimental | NINDS | 1503818 | Bupivacaine hydrochloride                              |
| 1922 I13 | X | 473    | 480    | -0.32773128 | 393    | 400    | -0.53289266 | 2465879 | 0.2284253   | 223857  | -0.03370315 | experimental | NINDS | 1504212 | Butobutamine hydrochloride                             |
| 1922 I14 | X | 674    | 680    | -0.01844108 | 513    | 520    | -0.29362835 | 2552876 | 0.44168443  | 2511487 | 0.69200401  | experimental | NINDS | 1503821 | Cystamine dinitrochloride                              |
| 1922 I15 | X | 513    | 520    | -0.26618099 | 632    | 640    | -0.05635791 | 2542474 | 0.41618556  | 2312702 | 0.16341756  | experimental | NINDS | 1503214 | Exudine                                                |
| 1922 I16 | X | 392    | 400    | -0.45237062 | 593    | 600    | -0.13411881 | 2706335 | 0.81786445  | 2208572 | -0.11347308 | experimental | NINDS | 1503822 | Ramifenazone                                           |
| 1922 I17 | X | 714    | 720    | 0.04310921  | 714    | 720    | 0.10713937  | 2483186 | 0.27085062  | 2474965 | 0.59488886  | experimental | NINDS | 1503215 | Enoxacin                                               |
| 1922 I18 | X | 673    | 680    | -0.01997984 | 594    | 600    | -0.13212494 | 2304875 | -0.16625007 | 2211193 | -0.10650362 | experimental | NINDS | 1503325 | Thiodiglycin                                           |
| 1922 I19 | X | 631    | 640    | -0.08460764 | 592    | 600    | -0.13611268 | 2688607 | 0.77440711  | 2545839 | 0.78334894  | experimental | NINDS | 1503228 | Paromomycin sulfate                                    |
| 1922 I20 | X | 911    | 920    | 0.34624438  | 672    | 680    | 0.02339686  | 2727898 | 0.87072267  | 2374971 | 0.3289962   | experimental | NINDS | 1503705 | Anethole                                               |
| 1922 I21 | X | 791    | 800    | 0.16159351  | 791    | 800    | 0.2606673   | 2512810 | 0.34346909  | 2581248 | 0.87750452  | experimental | NINDS | 1503218 | Heptaminol hydrochloride                               |
| 1922 I22 | X | 829    | 840    | 0.22006629  | 710    | 720    | 0.09916389  | 2401965 | 0.07175042  | 2232343 | -0.04787077 | experimental | NINDS | 1503902 | Sodium beta-nicotinamide adenine dinucleotide phosphat |
| 1922 I23 | E | 593    | 1040   | -0.14308042 | 616    | 1040   | -0.08825982 | 87348   | -5.60216032 | 86146   | -5.75718675 | empty        |       |         |                                                        |
| 1922 I24 | P | 150685 | 151480 | 230.812068  | 143207 | 144000 | 284.219551  | 2430011 | 0.14050067  | 2347759 | 0.25663712  | empty        |       |         |                                                        |
| 1922 J01 | N | 837    | 840    | 0.23237634  | 637    | 640    | -0.04638856 | 2281203 | -0.22427817 | 2142780 | -0.28841968 | empty        |       |         |                                                        |
| 1922 J02 | E | 275    | 280    | -0.62420521 | 195    | 200    | -0.92767877 | 88899   | -5.59835829 | 89036   | -5.74950196 | empty        |       |         |                                                        |
| 1922 J03 | X | 554    | 560    | -0.20309195 | 434    | 440    | -0.28964061 | 2349243 | -0.05748907 | 2251318 | 0.00019222  | experimental | NINDS | 1504258 | Nateglinide                                            |
| 1922 J04 | X | 554    | 560    | -0.20309195 | 434    | 440    | -0.45114402 | 6274771 | 9.56531051  | 5757211 | 9.32267979  | experimental | NINDS | 1505821 | Irinotecan hydrochloride                               |
| 1922 J05 | X | 473    | 480    | -0.32773128 | 434    | 440    | -0.45114402 | 2307049 | -0.16092086 | 2193482 | -0.15359869 | experimental | NINDS | 1504259 | Irbesartan                                             |
| 1922 J06 | X | 634    | 640    | -0.07999137 | 514    | 520    | -0.29163448 | 2898537 | 1.28901669  | 2722791 | 1.25387956  | experimental | NINDS | 1505822 | Osetamivir tartrate                                    |
| 1922 J07 | X | 553    | 560    | -0.20463071 | 394    | 400    | -0.53089879 | 2517235 | 0.35431626  | 2531984 | 0.7465073   | experimental | NINDS | 1504260 | Levofloxacin                                           |
| 1922 J08 | X | 586    | 600    | -0.15385172 | 474    | 480    | -0.37138925 | 2849476 | 1.16875156  | 2740331 | 1.30051993  | experimental | NINDS | 1505823 | Tegaserod                                              |
| 1922 J09 | X | 633    | 640    | -0.08153013 | 352    | 360    | -0.6146413  | 2645773 | 0.66940646  | 2444494 | 0.51386385  | experimental | NINDS | 1504261 | Candesartan cilexetil                                  |
| 1922 J10 | X | 632    | 640    | -0.08306889 | 594    | 600    | -0.13212494 | 2312468 | -0.14763706 | 237951  | 0.04415489  | experimental | NINDS | 1505308 | Chlorophyllide cu complex na salt                      |
| 1922 J11 | X | 795    | 800    | 0.16774854  | 434    | 440    | -0.45114402 | 2649142 | 0.67765053  | 2618059 | 0.97538814  | experimental | NINDS | 1504262 | Rosiglitazone                                          |
| 1922 J12 | X | 472    | 480    | -0.32927004 | 634    | 640    | -0.05237017 | 1610840 | -1.86756508 | 1650235 | -1.59813928 | experimental | NINDS | 1505322 | Cepharanthine                                          |
| 1922 J13 | X | 555    | 560    | -0.20155319 | 634    | 640    | -0.05237017 |         |             |         |             |              |       |         |                                                        |

|          |   |        |        |             |        |        |             |          |             |         |             |              |       |         |                               |
|----------|---|--------|--------|-------------|--------|--------|-------------|----------|-------------|---------|-------------|--------------|-------|---------|-------------------------------|
| 1922 K07 | X | 634    | 640    | -0.07999137 | 554    | 560    | -0.21187971 | 2767680  | 0.96824184  | 2396210 | 0.38547253  | experimental | NINDS | 1503222 | Fipexide hydrochloride        |
| 1922 K08 | X | 593    | 600    | -0.14308042 | 553    | 560    | -0.21387358 | 2307881  | -0.15888135 | 2147103 | -0.27692445 | experimental | NINDS | 1503908 | Paclitaxel                    |
| 1922 K09 | X | 513    | 520    | -0.26618099 | 834    | 840    | 0.34640368  | 2872213  | 1.22448765  | 2485727 | 0.62350595  | experimental | NINDS | 1503226 | Meclofenoxate hydrochloride   |
| 1922 K10 | X | 634    | 640    | -0.07999137 | 553    | 560    | -0.21387358 | 2301852  | -0.17266507 | 2433786 | 0.48273127  | experimental | NINDS | 1503914 | Subcitaine                    |
| 1922 K11 | X | 313    | 320    | -0.57393244 | 353    | 360    | -0.61264743 | 2151573  | -0.54204523 | 2440919 | -0.84355521 | experimental | NINDS | 1503227 | Perhexiline maleate           |
| 1922 K12 | X | 716    | 720    | 0.04618672  | 555    | 560    | -0.20988584 | 2453151  | 0.19722466  | 2374677 | 0.32845375  | experimental | NINDS | 1503918 | Clobetasol propionate         |
| 1922 K13 | X | 353    | 360    | -0.51238215 | 314    | 320    | -0.69040833 | 2712798  | 0.83370745  | 2094772 | -0.41607709 | experimental | NINDS | 1503229 | Methapyriene hydrochloride    |
| 1922 K14 | X | 514    | 520    | -0.26464224 | 354    | 360    | -0.61065356 | 2409973  | 0.09138075  | 2161955 | -0.2374317  | experimental | NINDS | 1503920 | Cloperastine hydrochloride    |
| 1922 K15 | X | 553    | 560    | -0.20463071 | 554    | 560    | -0.21187971 | 2629268  | 0.62894711  | 2135274 | -0.30837878 | experimental | NINDS | 1503230 | Nifedipine                    |
| 1922 K16 | X | 592    | 600    | -0.14461917 | 713    | 720    | 0.10514555  | 2699152  | 0.80025648  | 2430985 | 0.47794225  | experimental | NINDS | 1503921 | Cyproterone                   |
| 1922 K17 | X | 952    | 960    | 0.40933342  | 753    | 760    | 0.18490027  | 2748233  | 0.92057065  | 2456827 | 0.54665836  | experimental | NINDS | 1503231 | Nimesulide                    |
| 1922 K18 | X | 752    | 760    | 0.10158198  | 674    | 680    | 0.0273846   | 2843742  | 1.15469538  | 2452253 | 0.48131398  | experimental | NINDS | 1503922 | Tryptamine                    |
| 1922 K19 | X | 592    | 600    | -0.14461917 | 672    | 680    | 0.02339686  | 3145189  | 1.89364434  | 2853754 | 1.60212146  | experimental | NINDS | 1503234 | Beta-propiolactone            |
| 1922 K20 | X | 512    | 520    | -0.26771975 | 712    | 720    | 0.10315163  | 2621523  | 0.60996149  | 2528215 | 0.7364852   | experimental | NINDS | 1503923 | Iopanic acid                  |
| 1922 K21 | X | 872    | 880    | 0.28623285  | 711    | 720    | 0.10115776  | 3015458  | 1.57562969  | 2661450 | 1.09076855  | experimental | NINDS | 1503237 | Halcinonide                   |
| 1922 K22 | X | 870    | 880    | 0.28315533  | 990    | 1000   | 0.65744728  | 2375093  | 0.00587804  | 2633708 | 1.01700018  | experimental | NINDS | 1503925 | Ketorolac tromethamine        |
| 1922 K23 | E | 463    | 880    | -0.34311885 | 572    | 1040   | -0.17599007 | 89782    | -5.59619376 | 87383   | -5.75389473 | empty        |       |         |                               |
| 1922 K24 | P | 140167 | 141080 | 214.627419  | 157974 | 158760 | 313.663018  | 2316507  | -0.1377361  | 2739890 | 1.29934727  | empty        |       |         |                               |
| 1922 L01 | N | 557    | 560    | -0.19847568 | 596    | 600    | -0.1281372  | 2380631  | 0.01945356  | 2271471 | 0.05378078  | empty        |       |         |                               |
| 1922 L02 | E | 315    | 320    | -0.57085492 | 235    | 240    | -0.847924   | 85934    | -5.60562651 | 84591   | -5.7613216  | empty        |       |         |                               |
| 1922 L03 | X | 713    | 720    | 0.04157045  | 595    | 600    | -0.13013107 | 2968767  | 1.46117423  | 2688987 | 1.16399181  | experimental | NINDS | 1504303 | Moxifloxacin hydrochloride    |
| 1922 L04 | X | 591    | 600    | -0.14615793 | 469    | 480    | -0.3813586  | 2790784  | 1.02487757  | 2680844 | 1.14233887  | experimental | NINDS | 2300259 | Nicotine ditartrate           |
| 1922 L05 | X | 633    | 640    | -0.08153013 | 715    | 720    | 0.10913324  | 2459158  | 0.21194985  | 2486591 | 0.6258034   | experimental | NINDS | 1504401 | Pliglitazone hydrochloride    |
| 1922 L06 | X | 631    | 640    | -0.08460764 | 639    | 280    | -0.78013245 | 2700632  | 0.80388447  | 2385706 | 0.35754149  | experimental | NINDS | 2300228 | Kaonic acid                   |
| 1922 L07 | X | 593    | 600    | -0.14308042 | 424    | 440    | -0.45114402 | 2488247  | 0.28325865  | 2245684 | -0.01478907 | experimental | NINDS | 1503200 | Benazepril hydrochloride      |
| 1922 L08 | X | 553    | 560    | -0.20463071 | 634    | 640    | -0.05237017 | 2783963  | 1.00815699  | 2402969 | 0.33412666  | experimental | NINDS | 1503229 | Hydruroid                     |
| 1922 L09 | X | 553    | 560    | -0.20463071 | 512    | 520    | -0.29562222 | 2650289  | -0.62467671 | 2368449 | 0.30233886  | experimental | NINDS | 1505229 | Famciclovir                   |
| 1922 L10 | X | 593    | 600    | -0.14308042 | 593    | 600    | -0.13411881 | 2844459  | 1.15645319  | 2077444 | 1.21307056  | experimental | NINDS | 2300720 | Pinacidil                     |
| 1922 L11 | X | 395    | 400    | -0.44775435 | 715    | 720    | 0.10913324  | 2629389  | 0.62924373  | 2447548 | 0.5219847   | experimental | NINDS | 1505203 | Ezetimibe                     |
| 1922 L12 | X | 234    | 240    | -0.69549426 | 314    | 320    | -0.69040833 | 1237902  | -2.78176252 | 1245877 | -2.67336205 | experimental | NINDS | 2300094 | Astemizole                    |
| 1922 L13 | X | 515    | 520    | -0.26310348 | 475    | 480    | -0.36939538 | 2503779  | 0.32133104  | 2465039 | 0.56849477  | experimental | NINDS | 1505204 | Almotriptan                   |
| 1922 L14 | X | 673    | 680    | -0.01997984 | 555    | 560    | -0.20988584 | 2765400  | 0.96265278  | 2564472 | 0.83289569  | experimental | NINDS | 2300242 | Loxapine succinate            |
| 1922 L15 | X | 793    | 800    | 0.16467103  | 474    | 480    | -0.37138925 | 3102488  | 1.78896972  | 2428585 | 0.47156045  | experimental | NINDS | 1505205 | Olimesartan medoxomil         |
| 1922 L16 | X | 608    | 600    | -0.19909961 | 667    | 680    | -0.33638349 | 27436283 | -0.0055517  | 214387  | 1.59132712  | experimental | NINDS | 2300324 | Perphenazine                  |
| 1922 L17 | X | 632    | 640    | -0.08306889 | 673    | 680    | 0.02539073  | 2702038  | 0.8073105   | 2254065 | 0.00749673  | experimental | NINDS | 1505207 | Ceftibuten                    |
| 1922 L18 | X | 712    | 720    | 0.04003169  | 392    | 400    | -0.53488653 | 2442897  | 0.17208863  | 2423112 | 0.45700727  | experimental | NINDS | 2300214 | Diltiazem hydrochloride       |
| 1922 L19 | X | 753    | 760    | 0.10312074  | 673    | 680    | 0.02539073  | 2731675  | 0.87998138  | 2336976 | 0.22796422  | experimental | NINDS | 1505208 | Cefdinir                      |
| 1922 L20 | X | 513    | 520    | -0.26618099 | 631    | 640    | -0.05835178 | 2906827  | 1.30933829  | 2640092 | 1.03397579  | experimental | NINDS | 2300309 | Valsartan hydrochloride       |
| 1922 L21 | X | 632    | 640    | -0.08306889 | 632    | 680    | 0.02339686  | 2621033  | 0.60876034  | 2339621 | 0.2349975   | experimental | NINDS | 1505209 | Valsartan                     |
| 1922 L22 | X | 670    | 680    | -0.02459611 | 790    | 800    | 0.25867343  | 2523038  | 0.36854138  | 2722583 | 1.25332647  | experimental | NINDS | 2300206 | Diazoxide                     |
| 1922 L23 | E | 1088   | 1080   | -0.19909961 | 667    | 680    | -0.33638349 | 27436283 | -0.0055517  | 214387  | 1.59132712  | empty        |       |         |                               |
| 1922 L24 | P | 159473 | 160440 | 244.334666  | 124869 | 125760 | 247.655976  | 2336685  | -0.08827298 | 2091983 | -0.42349328 | empty        |       |         |                               |
| 1922 M01 | N | 436    | 440    | -0.3846653  | 715    | 720    | 0.10913324  | 2044142  | -0.80539502 | 1928350 | -0.85860753 | empty        |       |         |                               |
| 1922 M02 | E | 235    | 240    | -0.69395555 | 355    | 360    | -0.60865969 | 88094    | -5.60033162 | 83412   | -5.76445666 | empty        |       |         |                               |
| 1922 M03 | X | 791    | 800    | 0.16159351  | 391    | 400    | -0.5368804  | 1470104  | -2.21255672 | 1283911 | -2.57222637 | experimental | NINDS | 1503239 | Hycanthone                    |
| 1922 M04 | X | 1392   | 1400   | 1.0863866   | 1875   | 1880   | 2.42202157  | 2127066  | -0.6021202  | 2172118 | -0.21040741 | experimental | NINDS | 1503926 | Lansoprazole                  |
| 1922 M05 | X | 668    | 680    | -0.02767363 | 304    | 320    | -0.71034702 | 2891998  | 1.27298739  | 2361272 | 0.29256938  | experimental | NINDS | 1503240 | Pyridostigmine bromide        |
| 1922 M06 | X | 1440   | 1480   | -0.21102593 | 2113   | 2120   | -2.90055019 | 2323475  | -0.12065517 | 2126118 | -2.48896416 | experimental | NINDS | 1503242 | Eflornithine                  |
| 1922 M07 | X | 551    | 560    | -0.20770892 | 510    | 520    | -0.29560996 | 2605285  | -0.17267258 | 2407811 | -0.63171793 | experimental | NINDS | 1503242 | Isosorbide                    |
| 1922 M08 | X | 633    | 640    | -0.08153013 | 393    | 400    | -0.53289266 | 2407756  | 0.08594613  | 2147314 | -0.27636338 | experimental | NINDS | 1503931 | Morantel citrate              |
| 1922 M09 | X | 752    | 760    | 0.10158198  | 674    | 680    | 0.0273846   | 1910635  | -1.13266593 | 1865965 | -1.02449462 | experimental | NINDS | 1503244 | Lasolacil sodium              |
| 1922 M10 | X | 753    | 760    | 0.10312074  | 514    | 520    | -0.29163448 | 2362719  | -0.02445482 | 2309520 | 0.15495635  | experimental | NINDS | 1503932 | Oxyphenyclimine hydrochloride |
| 1922 M11 | X | 474    | 480    | -0.32619253 | 433    | 440    | -0.45313789 | 2236376  | -0.33416434 | 2170852 | -0.21377381 | experimental | NINDS | 1503245 | Levamisole hydrochloride      |
| 1922 M12 | X | 515    | 520    | -0.26310348 | 434    | 440    | -0.45114402 | 2226224  | -0.35905033 | 2330285 | 0.21017228  | experimental | NINDS | 1503933 | Pentolinium tartrate          |
| 1922 M13 | X | 554    | 560    | -0.20309195 | 394    | 400    | -0.53089879 | 2243144  | -0.31757368 | 2203826 | -0.1260931  | experimental | NINDS | 1503243 | Latetolol hydrochloride       |
| 1922 M14 | X | 593    | 600    | -0.14308042 | 554    | 560    | -0.21187971 | 1349513  | -2.50816613 | 1114287 | -3.0232712  | experimental | NINDS | 1503934 | Perphenazine                  |
| 1922 M15 | X | 513    | 520    | -0.26618099 | 554    | 560    | -0.21187971 | 2451284  | 0.19264801  | 2214123 | -0.09871249 | experimental | NINDS | 1503250 | Mephentermine sulfate         |
| 1922 M16 | X | 633    | 640    | -0.08153013 | 673    | 680    | 0.02539073  | 2078227  | -0.72184114 | 2039225 | -0.56378135 | experimental | NINDS | 1503935 | Propafenone hydrochloride     |
| 1922 M17 | X | 552    | 560    | -0.20616946 | 712    | 720    | 0.10315163  | 2728671  | 0.87261756  | 2315711 | 0.17141875  | experimental | NINDS | 1503251 | Metaraminol bitartrate        |
| 1922 M18 | X | 591    | 600    | -0.14615793 | 711    | 720    | 0.10115776  | 2056885  | -0.77415761 | 2248862 | -0.0063385  | experimental | NINDS | 1503936 | Metizoline                    |
| 1922 M19 | X | 713    | 720    | 0.04157045  | 551    | 560    | -0.21786132 | 2613189  | 0.58953204  | 2501817 | 0.66629065  | experimental | NINDS | 1503252 | Methazolamide                 |
| 1922 M20 | X | 513    | 520    | -0.26618099 | 1032   | 1040   | 0.74118979  | 2415497  | 0.10492194  | 2439601 | 0.50085294  | experimental | NINDS | 1503939 | Ribostamycin sulfate          |
| 1922 M21 | X | 632    | 640    | -0.08306889 | 751    | 760    | 0.18091253  | 1837803  | -1.31120185 | 1890529 | -0.95917683 | experimental | NINDS | 1503253 | Methylbenzethonium chloride   |
| 1922 M22 | X | 790    | 800    | 0.16005476  | 950    | 960    | 0.57769251  | 2458492  | 0.21031726  | 2337592 | 0.22960222  | experimental | NINDS | 1503254 | Thioctic acid                 |
| 1922 M23 | E | 597    | 1160   | -0.13692539 | 642    | 1080   | -0.03641922 | 90787    | -5.59373017 | 85689   | -5.75840192 | empty        |       |         |                               |
| 1922 M24 | P | 190867 | 191760 | 292.64241   | 147138 | 148080 | 292.057451  | 2542082  | 0.41522468  | 2395685 | 0.38407651  | empty        |       |         |                               |
| 1922 N01 | N | 676    | 680    | -0.01536357 | 676    | 680    | 0.03137234  | 2643300  | 0.6633443   | 2106220 | -0.38563587 | empty        |       |         |                               |
| 1922 N02 | E | 235    | 240    | -0.69395555 | 355    | 280    | -0.76816923 | 85586    | -5.60647958 | 83079   | -5.76534214 | empty        |       |         |                               |
| 1922 N03 | X | 592    | 600    | -0.14461917 | 475    | 440    | -0.44915015 | 2034399  | -0.82927842 | 2191036 | -0.16010282 | experimental | NINDS | 1505210 | Sibutramine hydrochloride     |
| 1922 N04 | X | 551    | 560    | -0.03849794 | 349    | 360    | -0.62065291 | 2356440  | -0.03984678 | 2135063 | 0.35583127  | experimental | NINDS | 2300212 | Terfenadine                   |
| 1922 N05 | X | 553    | 560    | -0.20463071 | 674    | 680    | 0.0273846   | 3384412  | 0.02872207  | 2284385 | 0.08811224  | experimental | NINDS | 1505212 | Torsimone                     |
| 1922 N06 | X | 631    | 640    | -0.08460764 | 629    | 640    | -0.06233952 | 2618700  | 0.60304136  | 2377045 | 0.33451115  | experimental | NINDS | 1600654 | Chaulmosulfone                |
| 1922 N07 | X | 473    | 480    | -0.32773128 | 434    | 440    | -0.45114402 | 2161282  | -0.518      |         |             |              |       |         |                               |

|          |   |        |        |            |             |        |            |             |             |              |             |             |              |       |         |                                     |
|----------|---|--------|--------|------------|-------------|--------|------------|-------------|-------------|--------------|-------------|-------------|--------------|-------|---------|-------------------------------------|
| 1922 001 | N |        | 675    | 680        | -0.01690232 | 475    | 480        | -0.36939538 | 1928184     | -1.08964738  | 1736231     | -1.36946851 | empty        |       |         |                                     |
| 1922 002 | E |        | 194    | 200        | -0.75704455 | 195    | 200        | -0.92767877 | 81006       | -5.61770671  | 83598       | -5.76396207 | empty        |       |         |                                     |
| 1922 003 | X |        | 834    | 840        | 0.22776007  | 634    | 640        | -0.05237017 | 2144629     | -0.55906733  | 1993863     | -0.68440281 | experimental | NINDS | 1503257 | Midodrine hydrochloride             |
| 1922 004 | X |        | 640    | 640        | -0.08306889 | 673    | 680        | 0.02539073  | 2213019     | -0.39143026  | 2030843     | -0.58822367 | experimental | NINDS | 1503947 | Caecydolic acid                     |
| 1922 005 | X |        | 512    | 520        | 0.26771975  | 752    | 760        | 0.18200664  | 0944233     | -0.68260503  | 3339819     | -0.3339819  | experimental | NINDS | 1503260 | Nadolol                             |
| 1922 006 | X |        | 713    | 720        | 0.04157045  | 553    | 560        | -0.21387358 | 2381778     | 0.02226524   | 2128241     | -0.32780813 | experimental | NINDS | 1503954 | Tulobuterol                         |
| 1922 007 | X |        | 513    | 520        | -0.26618099 | 433    | 440        | -0.45313789 | 2148451     | -0.54969831  | 1915784     | -0.8920216  | experimental | NINDS | 1503262 | Naltrexone hydrochloride            |
| 1922 008 | X |        | 592    | 600        | -0.14461917 | 592    | 600        | -0.13611268 | 2260997     | -0.27380992  | 2285309     | 0.09057722  | experimental | NINDS | 1503973 | 2-thiouacil                         |
| 1922 009 | X |        | 833    | 840        | 0.22622132  | 834    | 840        | 0.34640368  | 2195422     | -0.43455647  | 1993753     | -0.68469531 | experimental | NINDS | 1503266 | Nocodazole                          |
| 1922 010 | X |        | 552    | 560        | -0.20616946 | 553    | 560        | -0.21387358 | 2121682     | -0.6153182   | 1994590     | -0.68246966 | experimental | NINDS | 1503975 | Fluconazole                         |
| 1922 011 | X |        | 434    | 440        | -0.38774281 | 513    | 520        | -0.29362835 | 2205470     | -0.40992542  | 1998214     | -0.67283313 | experimental | NINDS | 1503267 | Nomifensine maleate                 |
| 1922 012 | X |        | 593    | 600        | -0.14308042 | 550    | 560        | -0.21985519 | 2033257     | -0.83207785  | 1912916     | -0.90495007 | experimental | NINDS | 1503978 | Hydroxychloroquine sulfate          |
| 1922 013 | X |        | 553    | 560        | -0.20463071 | 633    | 640        | -0.05436404 | 2105672     | -0.65456414  | 1917006     | -0.8887722  | experimental | NINDS | 1503269 | Pergolide mesylate                  |
| 1922 014 | X |        | 633    | 640        | -0.08153013 | 632    | 640        | -0.05635791 | 2011477     | -0.88546801  | 1966866     | -0.75619016 | experimental | NINDS | 1503982 | Agmatine sulfate                    |
| 1922 015 | X |        | 593    | 600        | -0.14308042 | 573    | 760        | 0.18490027  | 2378933     | 0.01529119   | 2169514     | -0.21733167 | experimental | NINDS | 1503270 | Prilocaine hydrochloride            |
| 1922 016 | X |        | 593    | 600        | -0.14308042 | 792    | 800        | 0.26266117  | 2179083     | -0.47460889  | 1958054     | -0.77962203 | experimental | NINDS | 1503985 | Brompheniramine maleate             |
| 1922 017 | X |        | 831    | 840        | 0.2231438   | 1033   | 1040       | 0.74318366  | 2620231     | 0.606679436  | 2353121     | 0.27089517  | experimental | NINDS | 1503273 | Hydrocortisone butyrate             |
| 1922 018 | X |        | 1068   | 1080       | 0.58782926  | 425    | 440        | -0.46908885 | 2204022     | -0.41347496  | 1964886     | -0.76145515 | experimental | NINDS | 1503991 | Clebopride maleate                  |
| 1922 019 | X |        | 791    | 800        | 0.16159351  | 873    | 880        | 0.42416458  | 2263680     | -0.26723298  | 2209147     | -0.11194411 | experimental | NINDS | 1503276 | Roxithromycin                       |
| 1922 020 | X |        | 703    | 720        | 0.02618288  | 667    | 680        | 0.01342751  | 1685028     | -1.68570515  | 1487506     | -2.03084971 | experimental | NINDS | 1503994 | Convallatoxin                       |
| 1922 021 | X |        | 3548   | 3560       | 0.440394716 | 2389   | 2400       | 3.44687036  | 1829634     | -1.33122683  | 1736664     | -1.36831712 | experimental | NINDS | 1503278 | Minoxalanthrone hydrochloride       |
| 1922 022 | X |        | 1740   | 1760       | 1.62187411  | 1424   | 1440       | 1.52278654  | 2090476     | -0.69181469  | 2124734     | -0.33640555 | experimental | NINDS | 1504002 | Baicalein                           |
| 1922 023 | E |        | 505    | 1120       | -0.27849105 | 607    | 1200       | -0.10620464 | 85699       | -5.60620258  | 83544       | -5.76410566 | empty        |       |         |                                     |
| 1922 024 | P | 207570 | 208640 | 318.344272 | 199500      | 200880 | 396.460432 | 2290594     | -0.20125764 | 2137183      | -0.30330258 | empty       |              |       |         |                                     |
| 1922 P01 | N |        | 797    | 800        | 0.17082606  | 718    | 720        | 0.11511484  | 1871537     | -1.22850838  | 1682900     | -1.51128023 | empty        |       |         |                                     |
| 1922 P02 | E |        | 275    | 280        | -0.63240521 | 275    | 280        | -0.63240521 | 77624       | -5.62599714  | 78954       | -5.77870704 | empty        |       |         |                                     |
| 1922 P03 | X |        | 634    | 640        | -0.07999137 | 675    | 680        | 0.022937847 | 2012422     | -0.8833149   | 1927775     | -0.93499365 | experimental | NINDS | 1505249 | Apramycin                           |
| 1922 P04 | X |        | 794    | 800        | 0.16620978  | 794    | 800        | 0.26664891  | 2359466     | -0.03242903  | 2125576     | -0.3341666  | experimental | NINDS | 107108  | Salpha-androstan-3,17-dione         |
| 1922 P05 | X |        | 874    | 880        | 0.28931036  | 674    | 680        | 0.0273846   | 1976984     | -0.97002204  | 2035737     | -0.57305624 | experimental | NINDS | 1505256 | Silibinin                           |
| 1922 P06 | X |        | 593    | 600        | -0.14308042 | 514    | 520        | -0.29163448 | 2242543     | -0.31904693  | 2368234     | 0.31108194  | experimental | NINDS | 107113  | Androsterone acetate                |
| 1922 P07 | X |        | 715    | 720        | 0.04464796  | 795    | 800        | 0.26864278  | 2025243     | -0.85172288  | 2015836     | -0.62597471 | experimental | NINDS | 1505261 | Telmisartan                         |
| 1922 P08 | X |        | 555    | 560        | -0.20155319 | 834    | 840        | 0.34640368  | 2266448     | -0.26044767  | 1981316     | -0.71776637 | experimental | NINDS | 200208  | Asarylaldehyde                      |
| 1922 P09 | X |        | 553    | 560        | -0.20463071 | 514    | 520        | -0.29163448 | 2135740     | -0.58085728  | 1815647     | -1.15829452 | experimental | NINDS | 1505262 | Sertraline hydrochloride            |
| 1922 P10 | X |        | 895    | 900        | -0.29084912 | 873    | 880        | -0.29084912 | 1560184     | -0.9174282   | 555         | -0.9174282  | experimental | NINDS | 200022  | Aklavine hydrochloride              |
| 1922 P11 | X |        | 473    | 480        | -0.32773128 | 713    | 720        | 0.1051455   | 2081899     | -0.71283982  | 2010465     | -0.64025667 | experimental | NINDS | 1505263 | Afluzocin                           |
| 1922 P12 | X |        | 955    | 960        | 0.4139497   | 1314   | 1320       | 1.30346092  | 2225355     | -0.36118054  | 2039443     | -0.56320167 | experimental | NINDS | 200499  | Acacetin                            |
| 1922 P13 | X |        | 634    | 640        | -0.07999137 | 752    | 760        | 0.1829064   | 2074890     | -0.73002126  | 2121404     | -0.34526203 | experimental | NINDS | 1505264 | Trindolapril                        |
| 1922 P14 | X |        | 675    | 680        | -0.01690232 | 954    | 960        | 0.58566799  | 2118969     | -0.62196869  | 2080873     | -0.45303573 | experimental | NINDS | 200701  | Benzylhydrazine hydrochloride       |
| 1922 P15 | X |        | 515    | 520        | -0.26310348 | 594    | 600        | -0.13212494 | 2008065     | -0.89383198  | 2025587     | -0.60004596 | experimental | NINDS | 1505265 | Telithromycin                       |
| 1922 P16 | X |        | 395    | 400        | -0.44775435 | 354    | 360        | -0.61065356 | 1509391     | -2.116265096 | 1093919     | -3.07743147 | experimental | NINDS | 200413  | 2,6-dimethoxyquinone                |
| 1922 P17 | X |        | 640    | 640        | -0.08157813 | 551    | 560        | -0.08157813 | 2056974     | -0.7739164   | 1579552     | -0.64043371 | experimental | NINDS | 1505267 | Oxapropin                           |
| 1922 P18 | X |        | 1273   | 1280       | 0.90327449  | 1675   | 1680       | 2.02324772  | 2311564     | -0.14985307  | 2285234     | 0.09037778  | experimental | NINDS | 200789  | Daidzein                            |
| 1922 P19 | X |        | 672    | 680        | -0.0215186  | 591    | 600        | -0.13810655 | 1830221     | -1.3297879   | 1831014     | -1.11743234 | experimental | NINDS | 1505270 | Propranolol hydrochloride (+/-)     |
| 1922 P20 | X |        | 754    | 760        | 0.1046595   | 593    | 600        | -0.13411881 | 2263634     | -0.26734574  | 1786300     | -1.23633072 | experimental | NINDS | 200258  | 2',4'-dihydroxycalcone 4'-glucoside |
| 1922 P21 | X |        | 824    | 840        | 0.2123725   | 988    | 1000       | 0.65345954  | 2159106     | -0.5235793   | 2128968     | -0.32514698 | experimental | NINDS | 1505271 | Crotamiton                          |
| 1922 P22 | X |        | 1269   | 1280       | 0.89711946  | 1149   | 1160       | 0.97447249  | 1920787     | -1.10777994  | 1807245     | -1.18063616 | experimental | NINDS | 200846  | Apigenin                            |
| 1922 P23 | E |        | 632    | 1280       | -0.08306889 | 511    | 1320       | -0.29761609 | 80894       | -5.61798126  | 78852       | -5.7765821  | empty        |       |         |                                     |
| 1922 P24 | E | 220952 | 221560 | 338.932921 | 27695       | 277080 | 549.973995 | 1882337     | -1.20203392 | 167531       | -1.05489861 | empty       |              |       |         |                                     |
| 1923 A01 | N |        | 637    | 640        | -0.15664951 | 598    | 600        | -0.4869651  | 1978823     | -0.43734719  | 1436879     | -0.93629796 | empty        |       |         |                                     |
| 1923 A02 | E |        | 237    | 240        | -0.88071431 | 117    | 120        | -0.01962081 | 76790       | -4.49559884  | 77139       | -3.8457789  | empty        |       |         |                                     |
| 1923 A03 | X |        | 316    | 320        | -0.73771109 | 316    | 320        | -1.38525172 | 1777851     | -1.73811764  | 1665460     | -1.61530199 | experimental | NINDS | 201315  | 7,8-dihydroxyflavone                |
| 1923 A04 | E |        | 595    | 600        | -0.23267439 | 596    | 600        | -0.49267208 | 1970670     | -1.42555109  | 2060890     | -1.06000021 | empty        |       |         |                                     |
| 1923 A05 | X |        | 874    | 880        | 0.27236231  | 675    | 680        | -0.24083711 | 1692007     | -1.87727386  | 1697635     | -1.57011869 | experimental | NINDS | 201138  | Deguelin(-)                         |
| 1923 A06 | E |        | 713    | 720        | -0.01907464 | 474    | 480        | -0.88158178 | 2101500     | -1.21347095  | 2337246     | -0.67191388 | empty        |       |         |                                     |
| 1923 A07 | X |        | 834    | 840        | 0.19995561  | 835    | 840        | 0.26920839  | 2264330     | -0.94951765  | 1863953     | -1.33655856 | experimental | NINDS | 201606  | Rutlantinone                        |
| 1923 A08 | E |        | 635    | 640        | -0.16026769 | 795    | 800        | -0.14169702 | 2341932     | -0.82372201  | 2412956     | -0.56559943 | empty        |       |         |                                     |
| 1923 A09 | X |        | 396    | 400        | -0.5928977  | 435    | 440        | -1.00590537 | 1577729     | -2.06252262  | 1881895     | -1.31136263 | experimental | NINDS | 201580  | Pomiferin                           |
| 1923 A10 | E |        | 435    | 440        | -0.52230117 | 715    | 720        | -0.11332574 | 2197407     | -1.05800224  | 2050466     | -1.07463862 | empty        |       |         |                                     |
| 1923 A11 | X |        | 636    | 640        | -0.15845753 | 675    | 680        | -0.24083711 | 2503456     | -0.56188578  | 2152327     | -0.93159536 | experimental | NINDS | 201716  | Norstictic acid                     |
| 1923 A12 | E |        | 516    | 520        | -0.37567761 | 516    | 520        | -0.74769483 | 2236680     | -0.99433929  | 2620814     | -0.27369974 | experimental | NINDS | 201664  | Celastrol                           |
| 1923 A13 | X |        | 195    | 200        | -0.95674134 | 234    | 240        | -1.64665004 | 1040299     | -2.93371602  | 998004      | -2.5526095  | experimental | NINDS | 201664  | Celastrol                           |
| 1923 A14 | E |        | 475    | 480        | -0.44989448 | 1190   | 1200       | 1.40087186  | 2519583     | -0.53574333  | 2216974     | -0.84081167 | empty        |       |         |                                     |
| 1923 A15 | X |        | 916    | 920        | 0.34838934  | 2752   | 2760       | 6.38019111  | 2242328     | -0.98518368  | 2359663     | -0.64043371 | experimental | NINDS | 201602  | Pachyrrhizin                        |
| 1923 A16 | E |        | 433    | 440        | -0.52592151 | 788    | 800        | 0.11938253  | 2445800     | -0.65534824  | 2150622     | -0.93398969 | empty        |       |         |                                     |
| 1923 A17 | X |        | 914    | 920        | 0.34476901  | 713    | 720        | -0.1197013  | 2560843     | -0.46885939  | 2575790     | -0.33692688 | experimental | NINDS | 201605  | Bisanthrolantianone                 |
| 1923 A18 | E |        | 673    | 680        | -0.09148133 | 834    | 840        | 0.26602061  | 2536365     | -0.50853911  | 2497992     | -0.4461785  | empty        |       |         |                                     |
| 1923 A19 | X |        | 914    | 920        | 0.34476901  | 754    | 760        | 0.01099786  | 2104991     | -1.20781191  | 1933534     | -1.23883763 | experimental | NINDS | 201604  | Pyrrromycin                         |
| 1923 A20 | X |        | 713    | 720        | -0.01907464 | 593    | 600        | -0.50223543 | 2546873     | -0.49150526  | 2392983     | -0.59364249 | experimental | NINDS | 210031  | Phenylacetohydroxamic acid          |
| 1923 A21 | E |        | 994    | 1000       | 0.4895824   | 1034   | 1040       | 0.90357749  | 2521624     | -0.5324348   | 2315763     | -0.70208242 | empty        |       |         |                                     |
| 1923 A22 | E |        | 871    | 880        | -0.36993181 | 870    | 880        | 0.38107807  | 2601203     | -0.40343437  | 2213691     | -0.84541356 | empty        |       |         |                                     |
| 1923 A23 | E |        | 783    | 1560       | 0.10763708  | 732    | 1520       | -0.591334   | 83134       | -4.48531498  | 1487718     | -3.85654002 | empty        |       |         |                                     |
| 1923 A24 | P | 266150 | 266600 | 480.466325 | 268837      | 269560 | 854.601806 | 2185148     | -1.07787452 | 1852627      | -1.35246364 | empty       |              |       |         |                                     |
|          |   |        |        |            |             |        |            |             |             |              |             |             |              |       |         |                                     |

|          |   |        |        |            |              |        |            |             |             |             |             |             |             |              |       |
|----------|---|--------|--------|------------|--------------|--------|------------|-------------|-------------|-------------|-------------|-------------|-------------|--------------|-------|
| 1923 B19 | E |        | 592    | 600        | -0.23810489  | 632    | 640        | -0.37791184 | 2777074     | -0.11834114 | 2422376     | -0.55236594 |             | empty        |       |
| 1923 B20 | E |        | 633    | 640        | -0.16388803  | 592    | 600        | -0.50542322 | 3114663     | 0.42890279  | 2633732     | -0.25555901 |             | empty        |       |
| 1923 B21 | E |        | 591    | 600        | -0.23991506  | 711    | 720        | -0.12607687 | 2541484     | -0.50024102 | 2455707     | -0.50555926 |             | empty        |       |
| 1923 B22 | E |        | 710    | 720        | -0.02450514  | 748    | 760        | -0.00812885 | 2856603     | 0.01057823  | 3162244     | 0.40251215  |             | empty        |       |
| 1923 B23 | E |        | 585    | 1040       | -0.25077606  | 911    | 1640       | 0.51488001  | 85618       | -4.48128833 | 90623       | -3.82684333 |             | empty        |       |
| 1923 B24 | P | 152583 | 153760 | 274.891046 | 246775       | 248160 | 784.272906 | 2360128     | -0.79422564 | 2080745     | -1.03211786 |             |             | empty        |       |
| 1923 C01 | N |        | 676    | 680        | -0.08605083  | 396    | 400        | -1.13022896 | 2218560     | -1.02371247 | 2065598     | -1.05338877 |             | empty        |       |
| 1923 C02 | E |        | 235    | 240        | -0.88433465  | 236    | 240        | -1.64027447 | 89111       | -4.47562605 | 91863       | -3.825102   |             | empty        |       |
| 1923 C03 | X |        | 515    | 520        | -0.37748778  | 554    | 560        | -0.62655903 | 3099243     | 0.40390642  | 2912865     | 0.13642706  |             | experimental |       |
| 1923 C04 | E |        | 705    | 720        | -0.03355598  | 634    | 640        | -0.37153627 | 2762953     | -0.14123179 | 3003173     | 0.26324646  |             | empty        |       |
| 1923 C05 | X |        | 3673   | 3680       | 5.33902082   | 553    | 560        | -0.62974681 | 2867789     | 0.02871114  | 2834782     | 0.02677522  |             | experimental |       |
| 1923 C06 | E |        | 461    | 480        | -0.47523682  | 472    | 480        | -0.88795735 | 3222856     | 0.60428755  | 336342      | 0.76884871  |             | empty        |       |
| 1923 C07 | X |        | 1594   | 1600       | 1.57568283   | 1073   | 1080       | 1.02790108  | 2873613     | 0.03815206  | 2862987     | 0.06638346  |             | experimental |       |
| 1923 C08 | E |        | 341    | 360        | -0.69245691  | 792    | 800        | 0.13213366  | 2999671     | 0.24249662  | 2999886     | 0.25863053  |             | empty        |       |
| 1923 C09 | X |        | 3874   | 3880       | 5.70286446   | 593    | 600        | -0.50223543 | 3415898     | 0.91721559  | 3345235     | 0.74360363  |             | experimental |       |
| 1923 C10 | E |        | 585    | 600        | -0.25077606  | 593    | 600        | -0.50223543 | 3179829     | 0.53453923  | 3318877     | 0.70658913  |             | empty        |       |
| 1923 C11 | X |        | 474    | 480        | -0.45170464  | 594    | 600        | -0.49904765 | 3103195     | 0.41031275  | 3492486     | 0.950388    |             | experimental |       |
| 1923 C12 | E |        | 473    | 480        | -0.45351481  | 673    | 680        | -0.24721268 | 2625141     | -0.36463001 | 3230062     | 0.58186635  |             | empty        |       |
| 1923 C13 | X |        | 634    | 640        | -0.16207786  | 712    | 720        | -0.12288909 | 3028780     | 0.28968336  | 2851314     | 0.04999108  |             | experimental |       |
| 1923 C14 | E |        | 353    | 360        | -0.6707349   | 793    | 800        | 0.13532145  | 3170993     | 0.52021575  | 3124698     | 0.43390384  |             | empty        |       |
| 1923 C15 | X |        | 635    | 640        | -0.16026769  | 632    | 640        | -0.37791184 | 3122379     | 0.44141071  | 3660962     | 1.18697861  |             | experimental |       |
| 1923 C16 | E |        | 554    | 560        | -0.30689125  | 592    | 600        | -0.50542322 | 2715124     | -0.21876433 | 2726167     | -0.12575267 |             | empty        |       |
| 1923 C17 | X |        | 552    | 560        | -0.31051159  | 632    | 640        | -0.37791184 | 2446434     | -0.6543205  | 3477598     | 0.9294808   |             | experimental |       |
| 1923 C18 | E |        | 714    | 720        | -0.01726447  | 872    | 880        | 0.38715642  | 2927747     | 0.12590522  | 2897076     | 0.11425459  |             | empty        |       |
| 1923 C19 | X |        | 593    | 600        | -0.23629472  | 791    | 800        | 0.12894588  | 3195810     | 0.56044501  | 2769290     | -0.06519511 |             | experimental |       |
| 1923 C20 | E |        | 592    | 600        | -0.23810489  | 671    | 680        | -0.44657299 | 2828738     | -0.0229705  | 3129262     | -0.37113145 |             | empty        |       |
| 1923 C21 | X |        | 592    | 600        | -0.23810489  | 671    | 680        | -0.25388625 | 2390715     | -0.74464309 | 2088654     | -0.02101127 |             | experimental |       |
| 1923 C22 | E |        | 831    | 840        | 0.19452511   | 830    | 840        | 0.25326947  | 2879852     | 0.0482657   | 2697211     | -0.16641554 |             | empty        |       |
| 1923 C23 | E |        | 629    | 1040       | -0.17112887  | 630    | 1240       | -0.38428741 | 85066       | -4.48218314 | 86147       | -3.83312898 |             | empty        |       |
| 1923 C24 | P | 138025 | 138920 | 248.538629 | 205802       | 207040 | 653.659816 | 2542095     | -0.49925057 | 2542095     | -0.49925057 | 2470271     | -0.48510706 |              | empty |
| 1923 D01 | N |        | 475    | 480        | -0.44989448  | 476    | 480        | -0.87520621 | 2997695     | 0.23929345  | 2221964     | -0.83380422 |             | empty        |       |
| 1923 D02 | E |        | 316    | 320        | -0.73771109  | 275    | 280        | -1.51595088 | 88467       | -4.47667    | 93930       | -3.82219932 |             | empty        |       |
| 1923 D03 | E |        | 395    | 400        | -0.59470787  | 594    | 600        | -0.49904765 | 2735326     | -0.18601616 | 2554769     | -0.36644664 |             | empty        |       |
| 1923 D04 | E |        | 334    | 360        | -0.66892473  | 412    | 420        | -0.66892473 | 3201248     | 0.5692812   | 2999663     | 3.257512    |             | empty        |       |
| 1923 D05 | E |        | 426    | 440        | -0.53859268  | 515    | 520        | -0.75088262 | 2892532     | 0.06882044  | 3085081     | 0.37826974  |             | empty        |       |
| 1923 D06 | E |        | 675    | 680        | -0.087861    | 634    | 640        | -0.37153627 | 3294117     | 0.7198042   | 3188877     | 0.52403032  |             | empty        |       |
| 1923 D07 | E |        | 471    | 480        | -0.45713515  | 511    | 520        | -0.76363376 | 3197747     | 0.56358495  | 2872229     | 0.07936198  |             | empty        |       |
| 1923 D08 | E |        | 475    | 480        | -0.44989448  | 592    | 600        | -0.50542322 | 2813266     | -0.05967261 | 3358893     | 0.76278354  |             | empty        |       |
| 1923 D09 | E |        | 545    | 560        | -0.32318276  | 672    | 680        | -0.25040047 | 3004838     | 0.25087251  | 3100366     | 0.39973445  |             | empty        |       |
| 1923 D10 | E |        | 433    | 440        | -0.52592151  | 711    | 720        | -0.12607687 | 3846957     | 1.61597776  | 2777717     | -0.05336108 |             | empty        |       |
| 1923 D11 | E |        | 520    | 530        | -0.37929795  | 553    | 560        | -0.62974681 | 3388932     | 0.87350273  | 3147362     | 0.06260307  |             | empty        |       |
| 1923 D12 | E |        | 594    | 600        | -0.23448456  | 591    | 600        | -0.508611   | 3724484     | 1.41744662  | 2894978     | 0.11130837  |             | empty        |       |
| 1923 D13 | E |        | 473    | 480        | -0.45351481  | 953    | 960        | 0.64536695  | 3015741     | 0.26854667  | 2882746     | 0.09413099  |             | empty        |       |
| 1923 D14 | E |        | 634    | 640        | -0.16207786  | 550    | 560        | -0.63931016 | 3076936     | 0.36774597  | 2766107     | -0.06966499 |             | empty        |       |
| 1923 D15 | E |        | 474    | 480        | -0.45170464  | 553    | 560        | -0.62974681 | 2891260     | 0.06675848  | 3448828     | 0.88907913  |             | empty        |       |
| 1923 D16 | E |        | 394    | 400        | -0.59651803  | 593    | 600        | -0.50223543 | 3473402     | 1.01043164  | 3057232     | 0.33916143  |             | empty        |       |
| 1923 D17 | E |        | 513    | 520        | -0.37929795  | 552    | 560        | -0.63293459 | 3206921     | 0.57845634  | 2646584     | -0.23751097 |             | empty        |       |
| 1923 D18 | E |        | 433    | 440        | -0.52592151  | 712    | 720        | -0.12288909 | 3453213     | 0.97794555  | 3123262     | 0.44405349  |             | empty        |       |
| 1923 D19 | E |        | 582    | 590        | -0.05151159  | 592    | 600        | -0.12288909 | 27905809    | -0.09647337 | 3016975     | 0.28262858  |             | empty        |       |
| 1923 D20 | E |        | 752    | 760        | 0.05152189   | 631    | 640        | -0.38109963 | 3262460     | 0.66848706  | 3450250     | 0.89107605  |             | empty        |       |
| 1923 D21 | E |        | 752    | 760        | 0.05152189   | 631    | 760        | 0.0014345   | 2838760     | -0.01834591 | 2740196     | -0.10605177 |             | empty        |       |
| 1923 D22 | E |        | 830    | 840        | 0.19271495   | 869    | 880        | 0.37759306  | 3132103     | 0.45717366  | 2673628     | -0.19953312 |             | empty        |       |
| 1923 D23 | E |        | 745    | 1200       | 0.03885072   | 754    | 1280       | 0.01099786  | 87904       | -4.47758264 | 93223       | -3.82319216 |             | empty        |       |
| 1923 D24 | P | 153713 | 154400 | 276.936535 | 177060       | 178120 | 562.036516 | 2590085     | -0.42145705 | 2599734     | -0.30330235 |             |             | empty        |       |
| 1923 E01 | N |        | 837    | 840        | 0.20538612   | 636    | 640        | -0.3651607  | 2315677     | -0.86628231 | 1993919     | -1.15404749 |             | empty        |       |
| 1923 E02 | E |        | 234    | 240        | -0.88614482  | 314    | 320        | -1.39162728 | 87516       | -4.4782116  | 96663       | -3.8136137  |             | empty        |       |
| 1923 E03 | X |        | 554    | 560        | -0.30689125  | 714    | 720        | -0.11651352 | 3147396     | 0.48196417  | 2949692     | 0.18814316  |             | experimental |       |
| 1923 E04 | E |        | 555    | 560        | -0.30508109  | 594    | 600        | -0.49904765 | 2831808     | -0.02961536 | 2853062     | 0.05244579  |             | empty        |       |
| 1923 E05 | X |        | 195    | 200        | -0.95674134  | 153    | 160        | -1.90486057 | 1267167     | -2.56595481 | 1227297     | -2.23061367 |             | experimental |       |
| 1923 E06 | E |        | 475    | 480        | -0.44989448  | 594    | 600        | -0.49904765 | 2838571     | -0.01865229 | 2827865     | 0.01706168  |             | empty        |       |
| 1923 E07 | X |        | 395    | 400        | -0.59470787  | 634    | 640        | -0.37153627 | 2225323     | -1.0127494  | 2266010     | -0.77195049 |             | experimental |       |
| 1923 E08 | E |        | 434    | 440        | -0.52411134  | 633    | 640        | -0.37472406 | 2980457     | 0.21135003  | 2807408     | -0.01166605 |             | empty        |       |
| 1923 E09 | X |        | 434    | 440        | -0.52411134  | 712    | 720        | -0.12607687 | 3450626     | 0.97351093  | 3802227     | 1.38535684  |             | experimental |       |
| 1923 E10 | E |        | 594    | 600        | -0.23448456  | 1152   | 1160       | 1.27973605  | 3062740     | 0.34473374  | 3140198     | 0.45567047  |             | empty        |       |
| 1923 E11 | X |        | 554    | 560        | -0.30689125  | 551    | 560        | -0.63612238 | 2747944     | -0.16556192 | 3754274     | 1.31801651  |             | experimental |       |
| 1923 E12 | E |        | 632    | 640        | -0.1656982   | 912    | 920        | 0.51466779  | 2666806     | -0.29708955 | 2783976     | -0.04457158 |             | empty        |       |
| 1923 E13 | X |        | 433    | 440        | -0.52592151  | 619    | 680        | -0.25996382 | 2757006     | -0.15087209 | 3306763     | 0.68957746  |             | experimental |       |
| 1923 E14 | E |        | 713    | 720        | -0.01907464  | 1232   | 1240       | 1.5347588   | 2667926     | -0.29527398 | 3065474     | 0.35073566  |             | empty        |       |
| 1923 E15 | X |        | 513    | 520        | -0.37929795  | 751    | 760        | 0.0014345   | 2812915     | -0.06024159 | 3230544     | 0.58254323  |             | experimental |       |
| 1923 E16 | E |        | 713    | 720        | -0.01907464  | 712    | 720        | -0.12288909 | 2734064     | -0.1880619  | 820249      | 0.00665393  |             | empty        |       |
| 1923 E17 | X |        | 793    | 800        | -0.151573875 | 873    | 880        | 0.13979232  | 3018385     | 0.27283269  | 2902608     | 0.12202317  |             | experimental |       |
| 1923 E18 | E |        | 752    | 760        | 0.05152189   | 711    | 720        | -0.12607687 | 2811174     | -0.06306381 | 2779731     | -0.05053282 |             | empty        |       |
| 1923 E19 | X |        | 992    | 1000       | 0.48596206   | 711    | 720        | -0.12607687 | 3394439     | 0.88242977  | 3113976     | 0.41884695  |             | experimental |       |
| 1923 E20 | E |        | 831    | 840        | 0.19452511   | 831    | 840        | 0.25645726  | 3373379     | 0.84829076  | 2738715     | -0.10813153 |             | empty        |       |
| 1923 E21 | X |        | 591    | 600        | -0.23991506  | 1031   | 1040       | 0.89401414  | 3185108     | 0.54309668  | 3527176     | 0.99910312  |             | experimental |       |
| 1923 E22 | E |        | 792    | 800        | 0.12392858   | 829    | 840        | 0.25008169  | 3240099     | 0.63223907  | 2800165     | -0.02183739 |             | empty        |       |
| 1923 E23 | E |        | 910    | 800        | -0.38653862  | 813    | 1280       | 0.19907714  | 86961       | -4.47911128 | 90238       | -3.82738399 |             | empty        |       |
| 1923 E24 | N | 96302  | 97160  | 173.013015 | 156927       | 157920 | 487.856833 | 2924407     | 0.121049097 | 2924407     | 0.121049097 | 3792982     | 0.29992353  |              | empty |
| 1923 F01 | N |        | 429    | 440        | -0.5316218   | 476    | 480        | -0.87520621 | 2595656     | -0.14242626 | 2371720     | -0.62350209 |             | empty        |       |
| 1923 F02 | E |        | 235    | 240        | -0.88433465  | 275    | 280        | -1.51595088 | 88431       | -4.47672836 | 91164       | -3.82680361 |             | empty        |       |
| 1923 F03 | E |        | 794    | 800        | 0.12754892   | 633    | 640        | -0.37472406 | 2746672     | -0.16762388 | 2392090     | -0.594      |             |              |       |

|          |   |        |        |             |        |        |              |         |             |          |             |       |         |                           |
|----------|---|--------|--------|-------------|--------|--------|--------------|---------|-------------|----------|-------------|-------|---------|---------------------------|
| 1923 F13 | E | 552    | 560    | -0.31051159 | 672    | 680    | -0.25040047  | 3273526 | 0.68642544  | 2700763  | -0.16142747 |       |         | empty                     |
| 1923 F14 | E | 714    | 720    | -0.01726447 | 710    | 720    | -0.12926466  | 3722923 | 1.41491418  | 3007324  | 0.2690757   |       |         | empty                     |
| 1923 F15 | E | 473    | 480    | -0.45351481 | 592    | 600    | -0.50542322  | 3069564 | 0.35579569  | 2764260  | -0.07225873 |       |         | empty                     |
| 1923 F16 | E | 634    | 640    | -0.16207786 | 552    | 560    | -0.63293459  | 3378537 | 0.85665206  | 3407504  | 0.8310479   |       |         | empty                     |
| 1923 F17 | E | 593    | 600    | -0.23629472 | 512    | 520    | -0.76044597  | 2997880 | 0.21955206  | 2539875  | -0.38736226 |       |         | empty                     |
| 1923 F18 | E | 473    | 480    | -0.45351481 | 713    | 720    | -0.1197013   | 3336062 | 0.78779855  | 2918595  | 0.14447369  |       |         | empty                     |
| 1923 F19 | E | 512    | 520    | -0.38291828 | 671    | 680    | -0.25358825  | 2749615 | -0.16285317 | 2543047  | -0.38290783 |       |         | empty                     |
| 1923 F20 | E | 592    | 600    | -0.23810489 | 631    | 640    | -0.38109963  | 3077839 | 0.36920976  | 3137072  | 0.45128063  |       |         | empty                     |
| 1923 F21 | E | 714    | 720    | -0.01726447 | 712    | 720    | -0.12288909  | 2445868 | -0.65523801 | 2740449  | -0.10569648 |       |         | empty                     |
| 1923 F22 | E | 631    | 640    | -0.16750836 | 510    | 520    | -0.76682154  | 3080161 | 0.37297381  | 2934905  | 0.1673778   |       |         | empty                     |
| 1923 F23 | E | 423    | 840    | -0.54402318 | 717    | 1200   | -0.10695017  | 88333   | -4.47688722 | 90099    | -3.82757919 |       |         | empty                     |
| 1923 F24 | P | 140595 | 141280 | 253.190739  | 162490 | 163520 | 515.590497   | 2409572 | -0.71407513 | 239160   | -0.59521951 |       |         | empty                     |
| 1923 G01 | N | 2756   | 2760   | 3.67909733  | 396    | 400    | -1.13022896  | 2589760 | -0.42198389 | 2059254  | -1.06229764 |       |         | empty                     |
| 1923 G02 | E | 269    | 280    | -0.82278896 | 235    | 240    | -1.64346225  | 90526   | -4.47333229 | 94980    | -3.82072481 |       |         | empty                     |
| 1923 G03 | X | 594    | 600    | -0.23448456 | 795    | 800    | 0.14169702   | 3105074 | 0.41335868  | 2834923  | 0.02697322  |       |         | experimental              |
| 1923 G04 | E | 393    | 400    | -0.5983282  | 512    | 520    | -0.76044597  | 3033377 | 0.29713526  | 2762139  | -0.07523724 | NINDS | 300034  | Testosterone propionate   |
| 1923 G05 | X | 635    | 640    | -0.16026769 | 554    | 560    | -0.62655903  | 2944145 | 0.15248697  | 2552911  | -0.36905583 |       |         | experimental              |
| 1923 G06 | E | 553    | 560    | -0.30870142 | 593    | 600    | -0.50223543  | 3091781 | 0.39181025  | 3256794  | 0.61940606  |       |         | empty                     |
| 1923 G07 | X | 634    | 640    | -0.16207786 | 673    | 680    | -0.24721268  | 3066247 | 0.35041871  | 3232122  | 0.58475921  | NINDS | 300038  | Juglone                   |
| 1923 G08 | E | 473    | 480    | -0.45351481 | 793    | 800    | 0.13532145   | 3114738 | 0.42902437  | 3309531  | 0.69346456  |       |         | empty                     |
| 1923 G09 | X | 554    | 560    | -0.30689125 | 672    | 680    | -0.25040047  | 3013193 | 0.26441627  | 3509947  | 0.97490846  |       |         | experimental              |
| 1923 G10 | E | 513    | 520    | -0.38110812 | 672    | 680    | -0.25040047  | 3575422 | 1.17580974  | 3787363  | 1.36448335  |       |         | empty                     |
| 1923 G11 | X | 595    | 600    | -0.23267439 | 832    | 840    | 0.25964504   | 3436820 | 0.9511309   | 3340258  | 0.73661444  | NINDS | 300061  | Eupatoriochromene         |
| 1923 G12 | E | 272    | 280    | -0.81735846 | 552    | 560    | -0.63293459  | 3321994 | 0.76499382  | 3195790  | 0.53373823  |       |         | empty                     |
| 1923 G13 | X | 393    | 400    | -0.5983282  | 632    | 640    | -0.37791184  | 2948523 | 0.15958387  | 3201001  | 0.51405603  | NINDS | 300546  | Bergapten                 |
| 1923 G14 | E | 393    | 400    | -0.5983282  | 792    | 800    | -0.12113366  | 3091781 | 0.16392662  | 3236090  | -0.08971869 |       |         | empty                     |
| 1923 G15 | X | 594    | 600    | -0.23448456 | 631    | 640    | -0.38109963  | 2984878 | 0.21851663  | 3077009  | 0.36692454  |       |         | experimental              |
| 1923 G16 | E | 514    | 520    | -0.37929795 | 913    | 920    | 0.51785558   | 2909188 | 0.09582041  | 2852967  | 0.05231239  |       |         | empty                     |
| 1923 G17 | X | 393    | 400    | -0.5983282  | 593    | 600    | -0.50223543  | 2529489 | -0.51968535 | 2182886  | -0.8886814  | NINDS | 300565  | Metergolone               |
| 1923 G18 | E | 554    | 560    | -0.30689125 | 633    | 640    | -0.37472406  | 2967854 | 0.19092011  | 2966571  | 0.21184632  |       |         | empty                     |
| 1923 G19 | X | 554    | 560    | -0.30689125 | 953    | 960    | 0.64536695   | 3319324 | 0.76066565  | 3055643  | 0.33693     |       |         | experimental              |
| 1923 G20 | E | 513    | 520    | -0.38110812 | 872    | 880    | 0.38715642   | 3525874 | 1.09549065  | 3269989  | 0.63793578  |       |         | empty                     |
| 1923 G21 | X | 312    | 320    | -0.74495176 | 392    | 400    | -1.1429801   | 1055973 | -2.90847    | 872643   | -2.58822391 | NINDS | 310035  | Sanguinarine sulfate      |
| 1923 G22 | E | 831    | 840    | -0.19452511 | 717    | 840    | -0.16074687  | 3104768 | 0.29272748  | 2033595  | -0.10970927 |       |         | empty                     |
| 1923 G23 | E | 751    | 1160   | 0.04971172  | 822    | 1400   | 0.2277672    | 85987   | -4.48069017 | 91893    | -3.82505988 |       |         | empty                     |
| 1923 G24 | P | 137850 | 138640 | 248.22185   | 195783 | 196720 | 621.721404   | 2948706 | 0.15988052  | 2760587  | -0.07741672 |       |         | empty                     |
| 1923 H01 | N | 550    | 560    | -0.31413192 | 597    | 600    | -0.4894843   | 2845892 | -0.00678468 | 2348924  | -0.65551448 |       |         | empty                     |
| 1923 H02 | E | 275    | 280    | -0.81192795 | 235    | 240    | -1.64346225  | 85290   | -4.48182003 | 90846    | -3.82653018 |       |         | empty                     |
| 1923 H03 | E | 554    | 560    | -0.30689125 | 393    | 400    | -1.13979232  | 2735942 | -0.1850176  | 2537163  | -0.39117072 |       |         | empty                     |
| 1923 H04 | E | 514    | 520    | -0.37929795 | 674    | 680    | -0.2440249   | 3403719 | 0.89747299  | 2861952  | 0.06493001  |       |         | empty                     |
| 1923 H05 | E | 440    | 440    | -0.5241113  | 553    | 560    | -0.62655903  | 3007277 | 0.25482622  | 2458641  | -0.50446812 |       |         | empty                     |
| 1923 H06 | E | 433    | 440    | -0.52592151 | 673    | 560    | -0.62674681  | 3425673 | 0.93954536  | 2825964  | 0.01439211  |       |         | empty                     |
| 1923 H07 | E | 714    | 720    | -0.01726447 | 673    | 680    | -0.24721268  | 3343949 | 0.80058366  | 2649405  | -0.23354944 |       |         | empty                     |
| 1923 H08 | E | 513    | 520    | -0.38110812 | 672    | 680    | -0.25040047  | 3481353 | 1.0233205   | 2459347  | -0.50044762 |       |         | empty                     |
| 1923 H09 | E | 633    | 640    | -0.16388803 | 552    | 560    | -0.63293459  | 3170115 | 0.51879249  | 2481122  | -0.46986902 |       |         | empty                     |
| 1923 H10 | E | 593    | 600    | -0.23629472 | 552    | 560    | -0.63293459  | 3481465 | 1.02350206  | 3100026  | 0.39925698  |       |         | empty                     |
| 1923 H11 | E | 553    | 560    | -0.30870142 | 792    | 800    | -0.13213366  | 3312841 | 0.75015648  | 2827898  | 0.01710802  |       |         | empty                     |
| 1923 H12 | E | 1114   | 1120   | -0.45332498 | 513    | 520    | -0.76044597  | 3104563 | -4.1253033  | 2495961  | -0.09273481 |       |         | empty                     |
| 1923 H13 | E | 632    | 640    | -0.1656982  | 632    | 720    | -0.1197013   | 3494002 | 1.04205249  | 2835076  | 0.02718808  |       |         | empty                     |
| 1923 H14 | E | 632    | 640    | -0.1656982  | 632    | 640    | -0.37791184  | 3673072 | 1.33410391  | 2862258  | 0.06535972  |       |         | empty                     |
| 1923 H15 | E | 793    | 800    | 0.12573875  | 752    | 760    | 0.00462229   | 3273717 | 0.68673506  | 2585022  | -0.32396239 |       |         | empty                     |
| 1923 H16 | E | 432    | 440    | -0.52773167 | 712    | 720    | -0.12288909  | 3460062 | 0.98880702  | 2964771  | 0.20931858  |       |         | empty                     |
| 1923 H17 | E | 755    | 760    | 0.05695239  | 474    | 480    | -0.88158178  | 3025441 | 0.28427072  | 1897795  | -1.28903429 |       |         | empty                     |
| 1923 H18 | E | 512    | 520    | -0.38291828 | 233    | 240    | -1.64983782  | 3650246 | 1.29710214  | 1450087  | -1.91774999 |       |         | empty                     |
| 1923 H19 | E | 592    | 600    | -0.23810489 | 272    | 280    | -1.52551423  | 3119901 | 0.43739378  | 1833670  | -1.37908493 |       |         | empty                     |
| 1923 H20 | E | 832    | 840    | -0.19633528 | 673    | 680    | -0.24721268  | 3249777 | 0.64792746  | 2033595  | -1.09833054 |       |         | empty                     |
| 1923 H21 | E | 832    | 840    | -0.19633528 | 431    | 440    | -0.101865651 | 3310240 | 0.74594016  | 2252448  | -0.79099559 |       |         | empty                     |
| 1923 H22 | E | 871    | 880    | 0.26693181  | 831    | 840    | 0.25645726   | 3018746 | 0.27341788  | 2632732  | -0.25696331 |       |         | empty                     |
| 1923 H23 | E | 613    | 1000   | -0.20009138 | 650    | 1120   | -0.32053172  | 90259   | -4.4737651  | 94999    | -3.82069812 |       |         | empty                     |
| 1923 H24 | P | 129550 | 130400 | 233.197461  | 157680 | 158840 | 500.257254   | 2748900 | -0.16401221 | 2638713  | -0.2485642  |       |         | empty                     |
| 1923 I01 | N | 516    | 520    | -0.37567761 | 556    | 560    | -0.62018346  | 2712271 | -0.22338914 | 2134098  | -0.95719432 |       |         | empty                     |
| 1923 I02 | E | 275    | 280    | -0.81192795 | 315    | 320    | -1.3884395   | 87103   | -4.47888109 | 92815    | -3.82376511 |       |         | empty                     |
| 1923 I03 | X | 714    | 720    | -0.01726447 | 555    | 560    | -0.62337124  | 3239116 | 0.63064559  | 2806684  | -0.01268277 | NINDS | 310039  | Alpha-tochopherol         |
| 1923 I04 | E | 633    | 640    | -0.16388803 | 473    | 480    | -0.88476956  | 3366474 | 0.8370975   | 2687417  | -0.18016924 |       |         | empty                     |
| 1923 I05 | X | 633    | 640    | -0.16388803 | 753    | 760    | 0.00781007   | 3561812 | 1.15374744  | 3301272  | 0.68186645  | NINDS | 310040  | Alpha-tochopheryl acetate |
| 1923 I06 | E | 634    | 640    | -0.16207786 | 593    | 600    | -0.50223543  | 3070146 | 0.35673913  | 3190668  | 0.52570284  |       |         | empty                     |
| 1923 I07 | X | 513    | 520    | -0.38110812 | 632    | 640    | -0.37791184  | 2985486 | 0.21950222  | 3468951  | 0.91733783  |       |         | experimental              |
| 1923 I08 | E | 634    | 640    | -0.16207786 | 753    | 760    | 0.00781007   | 3330221 | 0.77833008  | 33210643 | 0.55459628  |       |         | empty                     |
| 1923 I09 | X | 673    | 680    | -0.09148133 | 713    | 720    | -0.1197013   | 2555336 | -0.47786643 | 2362488  | -0.63646657 | NINDS | 330001  | Dactinomycin              |
| 1923 I10 | E | 593    | 600    | -0.23629472 | 751    | 760    | -0.0014345   | 3260694 | 0.66562431  | 2495961  | 0.51094787  |       |         | empty                     |
| 1923 I11 | E | 633    | 640    | -0.16207786 | 952    | 960    | 0.6417917    | 3541495 | -0.51205676 | 2380989  | -0.10037576 |       |         | experimental              |
| 1923 I12 | E | 714    | 720    | -0.01726447 | 632    | 640    | -0.37791184  | 3167058 | 0.51383698  | 3172657  | 0.50125259  |       |         | empty                     |
| 1923 I13 | X | 512    | 520    | -0.38291828 | 713    | 720    | -0.1197013   | 3425974 | 0.93354915  | 3585272  | 1.08068725  |       |         | experimental              |
| 1923 I14 | E | 593    | 600    | -0.23629472 | 432    | 440    | -1.01546872  | 3244415 | 0.63923546  | 3081577  | 0.37334908  |       |         | empty                     |
| 1923 I15 | X | 632    | 640    | -0.1656982  | 673    | 680    | -0.24721268  | 3360783 | 0.82787219  | 3124238  | 0.43325786  | NINDS | 1503142 | Tenoxicam                 |
| 1923 I16 | E | 674    | 680    | -0.08967117 | 552    | 560    | -0.63293459  | 2815406 | -0.05620359 | 3009486  | 0.27211179  |       |         | empty                     |
| 1923 I17 | X | 432    | 440    | -0.52773167 | 673    | 680    | -0.24721268  | 3710711 | 1.39511809  | 2831555  | 0.02224354  | NINDS | 1501157 | Suxibuzone                |
| 1923 I18 | E | 753    | 760    | 0.0533206   | 913    | 920    | 0.51785558   | 2920488 | 0.00375756  | 2818391  | 0.00375756  |       |         | experimental              |
| 1923 I19 | E | 752    | 760    | 0.05152189  | 673    | 920    | 0.51466779   | 3550062 | 1.13470027  | 2980660  | 0.23163148  |       |         | experimental              |
| 1923 I20 | E | 711    | 720    | -0.02269497 | 870    | 880    | 0.38078085   | 3432162 | 0.94358012  | 2848570  | 0.04613768  |       |         | empty                     |
| 1923 I21 | X | 712    | 720    | -0.02088481 | 1152</ |        |              |         |             |          |             |       |         |                           |





|          |   |        |        |             |        |        |             |          |             |             |             |             |         |             |                                                  |
|----------|---|--------|--------|-------------|--------|--------|-------------|----------|-------------|-------------|-------------|-------------|---------|-------------|--------------------------------------------------|
| 1923 N01 | N | 596    | 600    | -0.23086422 | 556    | 560    | -0.62018346 | 2901161  | 0.08280836  | 1954206     | -1.2098164  |             |         |             | empty                                            |
| 1923 N02 | E | 195    | 200    | -0.95674134 | 475    | 480    | -0.87839399 | 79633    | -4.49099023 | 113679      | -3.79446583 |             |         |             | empty                                            |
| 1923 N03 | E | 594    | 600    | -0.23448456 | 393    | 400    | -1.13979232 | 2564918  | -0.46225367 | 2174023     | -0.9011277  |             |         |             | empty                                            |
| 1923 N04 | E | 591    | 600    | -0.23629472 | 591    | 600    | -0.508611   | 2875052  | 0.04048473  | 2476262     | -0.47388531 |             |         |             | empty                                            |
| 1923 N05 | E | 551    | 560    | -0.31232176 | 712    | 720    | -0.12288909 | 2931205  | 0.13151076  | 2345853     | -0.65982708 |             |         |             | empty                                            |
| 1923 N06 | E | 554    | 560    | -0.30689125 | 592    | 600    | -0.50542322 | 2964436  | 0.18537941  | 2566242     | -0.35033512 |             |         |             | empty                                            |
| 1923 N07 | E | 553    | 560    | -0.30870142 | 632    | 640    | -0.37791184 | 2759333  | -0.14709994 | 2528463     | -0.40338812 |             |         |             | empty                                            |
| 1923 N08 | E | 394    | 400    | -0.59651803 | 553    | 560    | -0.62974681 | 3155924  | 0.49578836  | 2392349     | -0.59453281 |             |         |             | empty                                            |
| 1923 N09 | E | 394    | 400    | -0.59651803 | 512    | 720    | -0.12288909 | 3008785  | 0.25727074  | 2165782     | -0.91270053 |             |         |             | empty                                            |
| 1923 N10 | E | 594    | 600    | -0.23448456 | 713    | 720    | -0.1197013  | 2997730  | 0.23935019  | 2535431     | -0.39360296 |             |         |             | empty                                            |
| 1923 N11 | E | 554    | 560    | -0.30689125 | 673    | 680    | -0.24721268 | 3062203  | 0.34386324  | 2144458     | -0.94250536 |             |         |             | empty                                            |
| 1923 N12 | E | 474    | 480    | -0.45170464 | 473    | 480    | -0.88476596 | 3068566  | 0.3541779   | 2322241     | -0.68500896 |             |         |             | empty                                            |
| 1923 N13 | E | 473    | 480    | -0.45351481 | 513    | 520    | -0.75725819 | 2761749  | -0.14318352 | 2198496     | -0.8667603  |             |         |             | empty                                            |
| 1923 N14 | E | 594    | 600    | -0.23448456 | 672    | 680    | -0.25040047 | 3337680  | 0.79042139  | 2566333     | -0.35020733 |             |         |             | empty                                            |
| 1923 N15 | E | 632    | 640    | -0.1656982  | 671    | 680    | -0.25358825 | 2607662  | -0.3929641  | 2252680     | -0.79066979 |             |         |             | empty                                            |
| 1923 N16 | E | 633    | 640    | -0.16388803 | 511    | 520    | -0.76363376 | 3253170  | 0.65342763  | 1613053     | -1.68889707 |             |         |             | empty                                            |
| 1923 N17 | E | 632    | 640    | -0.1656982  | 472    | 480    | -0.88795735 | 3084958  | 0.38074992  | 1533928     | -1.80001219 |             |         |             | empty                                            |
| 1923 N18 | E | 712    | 720    | -0.02088481 | 472    | 480    | -0.88795735 | 3393358  | 0.88067743  | 1913972     | -1.26531695 |             |         |             | empty                                            |
| 1923 N19 | E | 789    | 800    | 0.11849808  | 630    | 640    | -0.38428741 | 2778818  | -0.11551406 | 1985966     | -1.16521588 |             |         |             | empty                                            |
| 1923 N20 | E | 992    | 1000   | 0.48596206  | 592    | 600    | -0.50542322 | 3083244  | 0.37797146  | 2333736     | -0.67684296 |             |         |             | empty                                            |
| 1923 N21 | E | 750    | 760    | 0.04790155  | 790    | 800    | 0.12575809  | 2688036  | -0.26267495 | 2292541     | -0.73469304 |             |         |             | empty                                            |
| 1923 N22 | E | 789    | 800    | 0.11849808  | 828    | 840    | 0.2468939   | 2930632  | 0.13058191  | 2618469     | -0.27699282 |             |         |             | empty                                            |
| 1923 N23 | E | 742    | 1240   | 0.03342022  | 749    | 1240   | -0.00494107 | 83357    | -4.48495349 | 87279       | -3.83153931 |             |         |             | empty                                            |
| 1923 N24 | P | 167807 | 168840 | 302.449034  | 164864 | 166000 | 523.158297  | 2478015  | -0.60312656 | 2469419     | -0.48630352 |             |         |             | empty                                            |
| 1923 O01 | N | 555    | 560    | -0.30508109 | 594    | 600    | -0.49904765 | 2252739  | -0.96830708 | 2077729     | -1.03653323 |             |         |             | empty                                            |
| 1923 O02 | E | 675    | 680    | -0.81191785 | 474    | 480    | -0.88159178 | 2564764  | 81696       | -4.48764603 | 86232       | -3.33300621 |         |             | empty                                            |
| 1923 O03 | E | 713    | 720    | -0.01907495 | 793    | 800    | 0.35860245  | 2786842  | -0.10250686 | 2719734     | -0.57428853 |             |         |             | experimental                                     |
| 1923 O04 | E | 671    | 680    | -0.09510167 | 991    | 1000   | 0.76650276  | 2624404  | -0.36582472 | 2503381     | -0.43861073 |             | 1503042 | Artemisinin |                                                  |
| 1923 O05 | X | 1152   | 1160   | 0.77558884  | 911    | 920    | 0.51148001  | 2529640  | -0.51944058 | 2269611     | -0.76689361 |             |         |             | experimental                                     |
| 1923 O06 | E | 551    | 560    | -0.31232176 | 671    | 680    | -0.25358825 | 2579055  | -0.43933708 | 2561200     | -0.35741559 |             | NINDS   | 1504410     | Picropodophyllotoxin                             |
| 1923 O07 | X | 793    | 800    | 0.12573875  | 793    | 800    | 0.13532145  | 2877141  | 0.04387107  | 3056499     | 0.33813208  |             |         |             | experimental                                     |
| 1923 O08 | E | 553    | 560    | -0.30870142 | 472    | 480    | -0.88795735 | 2867266  | 0.02786334  | 2893000     | 0.10853067  |             | NINDS   | 1503114     | Dibekacin                                        |
| 1923 O09 | X | 594    | 600    | -0.23448456 | 673    | 680    | -0.24721268 | 2498633  | -0.56970404 | 2780562     | -0.04936585 |             | NINDS   | 1501133     | Nicergoline                                      |
| 1923 O10 | E | 474    | 480    | -0.38110812 | 632    | 640    | -0.38110812 | 2771745  | 0.11015137  | 2899662     | -0.88995412 |             |         |             | experimental                                     |
| 1923 O11 | X | 554    | 560    | -0.30689125 | 672    | 680    | -0.25040047 | 2618070  | -0.37609236 | 2876637     | -0.08555213 |             | NINDS   | 1505346     | Ketanserin tartrate                              |
| 1923 O12 | E | 553    | 560    | -0.30870142 | 833    | 840    | 0.26283282  | 2676048  | -0.28210793 | 2743776     | -0.10102438 |             |         |             | empty                                            |
| 1923 O13 | X | 594    | 600    | -0.23448456 | 672    | 680    | -0.25040047 | 2511543  | -0.54877646 | 2769396     | -0.06504625 |             | NINDS   | 1503977     | Lovastatin                                       |
| 1923 O14 | E | 512    | 520    | -0.38291828 | 992    | 1000   | 0.76969055  | 2740544  | -0.17755759 | 2721329     | -0.13254667 |             |         |             | empty                                            |
| 1923 O15 | X | 873    | 880    | 0.27055214  | 870    | 880    | 0.38078085  | 2728358  | -0.19731153 | 2808703     | -0.00984749 |             | NINDS   | 1502060     | Snap (s-nitroso-n-acetylpenicillamine)           |
| 1923 O16 | E | 551    | 560    | -0.31232176 | 871    | 880    | 0.38396683  | 2925945  | -0.12298411 | 2654570     | -0.22629624 |             |         |             | empty                                            |
| 1923 O17 | E | 840    | 840    | 0.19452521  | 829    | 840    | 0.19452521  | 3095764  | 0.39826683  | 2397621     | -0.16993211 |             | NINDS   | 1502113     | Azaserine                                        |
| 1923 O18 | E | 549    | 560    | -0.31594209 | 879    | 880    | 0.25008169  | 2982848  | 0.21522593  | 2798384     | -0.02433844 |             |         |             | experimental                                     |
| 1923 O19 | X | 1873   | 1880   | 2.08071953  | 1752   | 1760   | 3.1924067   | 2819832  | -0.04902888 | 2438594     | -0.52959102 |             | NINDS   | 1500672     | Quercetin                                        |
| 1923 O20 | E | 588    | 600    | -0.24534556 | 588    | 600    | -0.51817436 | 2727935  | -0.19799723 | 2834956     | 0.02701956  |             |         |             | empty                                            |
| 1923 O21 | X | 671    | 680    | -0.09510167 | 911    | 920    | 0.51148001  | 3006205  | 0.25308847  | 2818724     | 0.00422499  |             | NINDS   | 1505035     | Enoxaparin sodium (1% wt/vol in 10%aqueous dmso) |
| 1923 O22 | E | 910    | 920    | 0.33752834  | 948    | 960    | 0.62942803  | 2634266  | -0.34983806 | 2674242     | -0.19867088 |             |         |             | empty                                            |
| 1923 O23 | E | 730    | 1280   | 0.01169821  | 794    | 1520   | 0.13850923  | 82306    | -4.4866572  | 84354       | -3.83564688 |             |         |             | empty                                            |
| 1923 O24 | P | 185138 | 186400 | 333.821047  | 245646 | 246840 | 780.673898  | 2642707  | -0.33615489 | 2496260     | -0.47192221 |             |         |             | empty                                            |
| 1923 P01 | N | 798    | 800    | 0.0478959   | 917    | 920    | 0.05060672  | 2151221  | -1.13287141 | 1732307     | -1.52142885 |             |         |             | empty                                            |
| 1923 P02 | E | 275    | 280    | -0.81192795 | 354    | 360    | -1.26411591 | 77252    | -4.49484992 | 110343      | -3.79915057 |             |         |             | empty                                            |
| 1923 P03 | E | 715    | 720    | -0.0154543  | 595    | 600    | -0.49585986 | 2249518  | -0.97352843 | 1717034     | -1.5428767  |             |         |             | empty                                            |
| 1923 P04 | E | 633    | 640    | -0.16388803 | 714    | 720    | -0.11651352 | 2661811  | -0.30518662 | 1966871     | -1.19203096 |             |         |             | empty                                            |
| 1923 P05 | E | 953    | 960    | 0.41536553  | 633    | 640    | -0.37472406 | 2421429  | -0.69485451 | 1834002     | -1.3786187  |             |         |             | empty                                            |
| 1923 P06 | E | 633    | 640    | -0.16388803 | 634    | 640    | -0.37153627 | 2735146  | -0.18630794 | 2040748     | -1.08828559 |             |         |             | empty                                            |
| 1923 P07 | E | 834    | 840    | 0.19995561  | 594    | 600    | -0.49904765 | 2567925  | -0.45737921 | 1950103     | -1.21557824 |             |         |             | empty                                            |
| 1923 P08 | E | 754    | 760    | 0.05514222  | 635    | 640    | -0.36834849 | 2771356  | -0.12761023 | 2112190     | -0.98795969 |             |         |             | empty                                            |
| 1923 P09 | E | 555    | 560    | -0.30508109 | 554    | 560    | -0.62655903 | 2677822  | -0.27923221 | 2012376     | -1.12812835 |             |         |             | empty                                            |
| 1923 P10 | E | 515    | 520    | -0.37748778 | 755    | 760    | 0.01418564  | 2685732  | -0.26640982 | 2061017     | -1.05982186 |             |         |             | empty                                            |
| 1923 P11 | E | 595    | 600    | -0.23267439 | 594    | 600    | -0.49904765 | 2564860  | -0.46234769 | 1864207     | -1.33620187 |             |         |             | empty                                            |
| 1923 P12 | E | 635    | 640    | -0.16026769 | 674    | 680    | -0.2440249  | 2805263  | -0.07264576 | 2011416     | -1.12947648 |             |         |             | empty                                            |
| 1923 P13 | E | 554    | 560    | -0.30689125 | 554    | 560    | -0.62655903 | 2499073  | -0.56899078 | 1795947     | -1.43205929 |             |         |             | empty                                            |
| 1923 P14 | E | 715    | 720    | -0.0154543  | 593    | 600    | -0.50223543 | 2730979  | -0.1930628  | 1900638     | -1.28504186 |             |         |             | empty                                            |
| 1923 P15 | E | 673    | 680    | -0.09148133 | 833    | 800    | 0.13532145  | 2605857  | -0.39589007 | 2337048     | -0.67219193 |             |         |             | empty                                            |
| 1923 P16 | E | 673    | 680    | -0.09148133 | 833    | 840    | 0.26283282  | 2791158  | -0.09551047 | 2508472     | -0.43146145 |             |         |             | empty                                            |
| 1923 P17 | E | 1194   | 1200   | 0.85161587  | 833    | 840    | 0.26283282  | 2695194  | -0.25107157 | 2260467     | -0.77973452 |             |         |             | empty                                            |
| 1923 P18 | E | 473    | 480    | -0.45351481 | 833    | 840    | 0.26283282  | 2699799  | -0.2436067  | 2615310     | -0.281429   |             |         |             | empty                                            |
| 1923 P19 | E | 551    | 560    | -0.31232176 | 710    | 720    | -0.12926466 | 2503712  | -0.5614708  | 2485571     | -0.46362129 |             |         |             | empty                                            |
| 1923 P20 | E | 675    | 680    | -0.087861   | 874    | 880    | 0.39353199  | 2802273  | -0.07749266 | 2657654     | -0.22196538 |             |         |             | empty                                            |
| 1923 P21 | E | 674    | 680    | -0.08967117 | 672    | 680    | -0.25040047 | 2462262  | -0.62866274 | 2486108     | -0.46286718 |             |         |             | empty                                            |
| 1923 P22 | E | 711    | 720    | -0.02269497 | 950    | 960    | 0.63508769  | 2604458  | -0.33981577 | 2477502     | -0.47495258 |             |         |             | empty                                            |
| 1923 P23 | E | 745    | 1520   | 0.05885072  | 1124   | 1840   | 1.19047809  | 78495    | -4.49283497 | 79905       | -1.84189261 |             |         |             | empty                                            |
| 1923 P24 | P | 265296 | 265840 | 478.920442  | 244120 | 244840 | 775.809339  | 2222722  | -1.01696572 | 2172201     | -0.90368633 |             |         |             | empty                                            |
| 1989 A01 | N | 477    | 480    | -0.27800167 | 718    | 720    | 0.48933909  | 1377379  | -1.60269181 | 1223427     | -1.42684034 |             |         |             | empty                                            |
| 1989 A02 | E | 117    | 120    | -0.74557931 | 76     | 80     | -1.80528901 | 77730    | -3.98393991 | 76348       | -3.32822057 |             |         |             | empty                                            |
| 1989 A03 | X | 516    | 520    | -0.22734742 | 517    | 520    | -0.22907251 | 1587224  | -1.21820086 | 1439840     | -1.06811753 |             | BIOMOL  | SL115       | C16-ceramide                                     |
| 1989 A04 | X | 752    | 760    | 0.0791757   | 872    | 880    | 1.0397639   | 1465437  | -1.44134983 | 1448856     | -1.05317274 |             | BIOMOL  | L120        | C-PAF                                            |
| 1989 A05 | X | 475    | 480    | -0.28059932 | 353    | 360    | -0.81523919 | 1547583  | -1.29083995 | 1433353     | -1.07887028 |             | BIOMOL  | SL145       | C8 CERAMINE                                      |
| 1989 A06 | X | 996    | 1000   | 0.39608944  | 595    | 600    | -0.28059932 | 22898152 | -0.28059932 | 1585861     | -0.6824589  |             |         |             |                                                  |

|          |   |        |        |             |        |        |             |         |             |           |             |              |              |        |                                     |                          |
|----------|---|--------|--------|-------------|--------|--------|-------------|---------|-------------|-----------|-------------|--------------|--------------|--------|-------------------------------------|--------------------------|
| 1989 A19 | X | 714    | 720    | 0.02982028  | 635    | 640    | 0.19268157  | 1865844 | -0.70771451 | 1719951   | -0.60380991 | experimental | BIOMOL       | H112   | 12(R)-HETE                          |                          |
| 1989 A20 | X | 554    | 560    | -0.177992   | 475    | 480    | -0.37918837 | 1775372 | -0.87347948 | 1687273   | -0.65797645 | experimental | BIOMOL       | FA-002 | docosahexenoic                      |                          |
| 1989 A21 | X | 955    | 960    | 0.34283754  | 593    | 600    | 0.04256571  | 2003863 | -0.45483278 | 1558348   | -0.87168052 | experimental | BIOMOL       | H012   | 12(S)-HETE                          |                          |
| 1989 A22 | X | 589    | 600    | -0.13253307 | 1150   | 1160   | 2.03338791  | 1703226 | -1.0056711  | 1605510   | -0.79350552 | experimental | BIOMOL       | FA-012 | docosapentaenoic acid               |                          |
| 1989 A23 | E | 1082   | 2040   | 0.50778854  | 1281   | 2080   | 6.50160642  | 80329   | 0.97777786  | 488977    | -3.32568613 | empty        |              |        |                                     |                          |
| 1989 A24 | P | 328524 | 329080 | 425.798232  | 272308 | 272920 | 971.202808  | 1719142 | -0.97650543 | 1559083   | -0.87046219 | empty        |              |        |                                     |                          |
| 1989 B01 | N | 932    | 960    | 0.31296453  | 476    | 480    | -0.37561418 | 1796448 | -0.83486353 | 1813309   | -0.44906114 | empty        |              |        |                                     |                          |
| 1989 B02 | E | 115    | 120    | -0.74817697 | 118    | 120    | -1.65517315 | 80397   | -3.97905337 | 82266     | -3.31841099 | empty        |              |        |                                     |                          |
| 1989 B03 | X | 456    | 480    | -0.30527703 | 190    | 200    | -1.39783168 | 1191332 | -1.94357159 | 1078808   | -1.66655853 | experimental | BIOMOL       | AC-104 | BEPRIDIL HYDROCHLORIDE              |                          |
| 1989 B04 | X | 1804   | 1840   | 1.44554149  | 2032   | 2040   | 5.18582091  | 1548983 | -1.28827484 | 1688663   | -0.65534089 | experimental | BIOMOL       | GR-313 | Lycorine                            |                          |
| 1989 B05 | X | 293    | 320    | -0.5169858  | 866    | 880    | 1.01831878  | 1579338 | -1.23265768 | 1563526   | -0.86039054 | experimental | BIOMOL       | CA-415 | CYCLOFLAZONIC ACID                  |                          |
| 1989 B06 | X | 3542   | 3560   | 3.70290246  | 1833   | 1840   | 4.47455769  | 4787140 | 6.64475416  | 488940    | 6.63544801  | W            | experimental | BIOMOL | GR-316                              | 10-hydroxycycamptothecin |
| 1989 B07 | X | 385    | 400    | -0.39749373 | 429    | 440    | -0.54360097 | 1727929 | -0.96040568 | 1650239   | -0.71936343 | experimental | BIOMOL       | AC-100 | dantrolene                          |                          |
| 1989 B08 | X | 74     | 80     | -0.80142887 | 155    | 160    | -1.52292823 | 1007575 | -2.28025558 | 947971    | -1.8834319  | experimental | BIOMOL       | GR-308 | beta-lapachone                      |                          |
| 1989 B09 | X | 516    | 520    | -0.22734742 | 316    | 320    | -0.94748411 | 2035144 | -0.39751898 | 1760154   | -0.53717004 | experimental | BIOMOL       | KC-115 | DIAZOXIDE                           |                          |
| 1989 B10 | X | 75     | 80     | -0.80013004 | 156    | 160    | -1.51935404 | 1251955 | -1.83249667 | 1213758   | -1.44286752 | experimental | BIOMOL       | T-113  | Parthenolide                        |                          |
| 1989 B11 | X | 115    | 120    | -0.74817697 | 115    | 120    | -1.66589571 | 1013418 | -2.26954989 | 1013123   | -1.77543696 | experimental | BIOMOL       | CA-204 | dichlorobenzamil                    |                          |
| 1989 B12 | X | 675    | 680    | -0.02083396 | 514    | 520    | -0.23979507 | 1107346 | -2.09745275 | 1062547   | -1.69351251 | experimental | BIOMOL       | PI-102 | MG-132                              |                          |
| 1989 B13 | X | 432    | 440    | -0.33648887 | 432    | 440    | -0.53287841 | 1848788 | -0.73896492 | 1760981   | -0.53575992 | experimental | BIOMOL       | CA-205 | dilitazem                           |                          |
| 1989 B14 | X | 593    | 600    | -0.12733776 | 554    | 560    | -0.09682759 | 1554086 | -1.278925   | 1497803   | -0.97203896 | experimental | BIOMOL       | EI-301 | Helanalin                           |                          |
| 1989 B15 | X | 513    | 520    | -0.2312439  | 793    | 800    | 0.75740312  | 2025271 | -0.41560853 | 1849115   | -0.38970968 | experimental | BIOMOL       | KC-158 | E-4031                              |                          |
| 1989 B16 | X | 435    | 440    | -0.33255239 | 554    | 560    | -0.09682759 | 1893646 | -0.65677502 | 1845766   | -0.39526093 | experimental | BIOMOL       | GR-211 | Bezafibrate                         |                          |
| 1989 B17 | X | 475    | 480    | -0.28059932 | 553    | 560    | -0.10040177 | 2146285 | -0.19388378 | 1724086   | -0.59695579 | experimental | BIOMOL       | CM-102 | FIPRONIL                            |                          |
| 1989 B18 | X | 392    | 400    | -0.38840194 | 753    | 760    | 0.61443564  | 1938067 | -0.57538579 | 2049487   | -0.05757618 | experimental | BIOMOL       | IM-100 | cycloheximide-N-ethylethanoate      |                          |
| 1989 B19 | X | 514    | 520    | -0.22994508 | 313    | 320    | -0.95820667 | 2009117 | -0.44520628 | 1882980   | -0.33557558 | experimental | BIOMOL       | AC-130 | FLUCELAZINE                         |                          |
| 1989 B20 | X | 440    | 450    | -0.33514505 | 514    | 520    | -0.23979507 | 1107346 | -2.09745275 | 1062547   | -1.69351251 | experimental | BIOMOL       | A-165  | ascomycin (FK-520)                  |                          |
| 1989 B21 | X | 712    | 720    | 0.02722263  | 833    | 840    | 0.90037061  | 2036132 | -0.39570876 | 20217482  | -0.39570876 | experimental | BIOMOL       | AC-123 | FLUFENAMIC ACID                     |                          |
| 1989 B22 | X | 671    | 680    | -0.02602927 | 707    | 720    | 0.45002304  | 2005762 | -0.45135339 | 1600382   | -0.80200561 | experimental | BIOMOL       | FR-100 | U-74389G                            |                          |
| 1989 B23 | E | 759    | 1320   | 0.08826749  | 1222   | 1840   | 2.29072938  | 85989   | -3.96880757 | 84027     | -3.31549198 | empty        |              |        |                                     |                          |
| 1989 B24 | P | 188473 | 190000 | 243.896241  | 207998 | 209280 | 741.346837  | 1849975 | -0.73679007 | 1769419   | -0.52181252 | empty        |              |        |                                     |                          |
| 1989 C01 | N | 9236   | 9240   | 11.0984222  | 437    | 440    | -0.51000748 | 1837319 | -0.7599787  | 1741339   | -0.56835749 | empty        |              |        |                                     |                          |
| 1989 C02 | E | 36     | 80     | -0.85078428 | 76     | 80     | -1.80528901 | 86538   | -3.96780168 | 84200     | -3.31520522 | empty        |              |        |                                     |                          |
| 1989 C03 | X | 5725   | 5760   | 6.53824136  | 636    | 640    | 0.19625575  | 2513985 | 0.47982499  | 2035510   | -0.08074424 | experimental | BIOMOL       | HP012  | 12(S)-HPETE                         |                          |
| 1989 C04 | X | 1100   | 1104   | -0.00138803 | 749    | 760    | 0.13394482  | 2260136 | -0.19541551 | 2043562   | -0.06437896 | experimental | BIOMOL       | FA-010 | 12-CYCLOSTRIENEOIC ACID (22:3 n-3)  |                          |
| 1989 C05 | X | 3392   | 3440   | 3.50807844  | 513    | 520    | -0.24336926 | 2040032 | -0.38856307 | 2035760   | -0.08032984 | experimental | BIOMOL       | G234   | 12-METHOXYDODECANOIC ACID           |                          |
| 1989 C06 | X | 4856   | 4880   | 5.40956087  | 508    | 520    | -0.26124019 | 2204116 | -0.08792443 | 1781819   | -0.50125844 | experimental | BIOMOL       | FA024  | EICOSA-5,8-DIENOIC ACID (20:2 n-12) |                          |
| 1989 C07 | X | 581    | 600    | -0.14292368 | 1113   | 1120   | 1.90114299  | 2314083 | -0.11355975 | 1970145   | -0.18909228 | experimental | BIOMOL       | H0013  | 13(S)-HODE                          |                          |
| 1989 C08 | X | 835    | 840    | 0.18697833  | 353    | 360    | -0.81523919 | 2145030 | -0.19618322 | 1961913   | -0.20273747 | experimental | BIOMOL       | FA007  | eicosadienoic                       |                          |
| 1989 C09 | X | 633    | 640    | -0.07538469 | 555    | 560    | -0.09325234 | 2358112 | 0.19423074  | 1800594   | -0.47013733 | experimental | BIOMOL       | HP013  | 13(S)-HPODE                         |                          |
| 1989 C10 | X | 635    | 640    | -0.02787073 | 395    | 400    | -0.66512333 | 1785375 | -0.85515174 | 1864151   | -0.36478624 | experimental | BIOMOL       | FA001  | eicosapentaenoic                    |                          |
| 1989 C11 | X | 406    | 420    | -0.32394508 | 714    | 720    | 0.47504235  | 2101664 | -0.27563944 | 2043562   | -0.06726479 | experimental | BIOMOL       | PG046  | 13,14-DIHYDRO-PGE1                  |                          |
| 1989 C12 | X | 313    | 320    | -0.49100926 | 512    | 520    | -0.24694344 | 8833751 | -0.76551607 | 1998004   | -0.14291316 | experimental | BIOMOL       | FA008  | EICOSATRIENEOIC ACID (20:3 n-3)     |                          |
| 1989 C13 | X | 955    | 960    | 0.34283754  | 1194   | 1200   | 2.19065214  | 1886011 | -0.67076405 | 1783868   | -0.49786209 | experimental | BIOMOL       | GR102  | 13-cis-retinoic                     |                          |
| 1989 C14 | X | 432    | 440    | -0.33648887 | 552    | 560    | -0.10397596 | 2110416 | -0.25960382 | 1835001   | -0.41310482 | experimental | BIOMOL       | L110   | ENANTIO-PAF C16                     |                          |
| 1989 C15 | X | 675    | 680    | -0.02083396 | 553    | 560    | -0.10040177 | 2451192 | 0.36477415  | 1998244   | -0.14251578 | experimental | BIOMOL       | K0013  | 13-KETOCTADECADIENEOIC ACID         |                          |
| 1989 C16 | X | 313    | 320    | -0.49100926 | 714    | 720    | -0.95463249 | 2216918 | -0.0644683  | 1896781   | -0.31069926 | experimental | BIOMOL       | G222   | farnesylthioacetic acid             |                          |
| 1989 C17 | X | 554    | 560    | -0.177992   | 554    | 560    | -0.09682759 | 2359397 | 0.19658515  | 2061449   | -0.03774815 | experimental | BIOMOL       | EI14   | 14,15-EPOXYEICOSATRIENEOIC ACID     |                          |
| 1989 C18 | X | 440    | 450    | -0.07405896 | 435    | 440    | -0.07405896 | 2145444 | -0.19541551 | 2181668   | 0.65157171  | experimental | BIOMOL       | RA105  | FLUPROSTENOL                        |                          |
| 1989 C19 | X | 553    | 560    | -0.19290893 | 435    | 440    | -0.52155858 | 2297624 | -0.73153777 | 2010184   | -0.20879258 | experimental | BIOMOL       | H015   | gamma-HETE                          |                          |
| 1989 C20 | X | 713    | 720    | 0.02852146  | 474    | 480    | -0.38276255 | 2187016 | -0.11925546 | 1974014   | -0.18267904 | experimental | BIOMOL       | FA006  | gamma-linolenic                     |                          |
| 1989 C21 | X | 792    | 800    | -0.13112877 | 552    | 560    | -0.10397596 | 2352366 | 0.18370278  | 2233525   | 0.24748234  | experimental | BIOMOL       | HP015  | 15(S)-HPETE                         |                          |
| 1989 C22 | X | 550    | 560    | -0.18318731 | 751    | 760    | 0.60728727  | 2352903 | 0.18468668  | 2032912   | -0.08505064 | experimental | BIOMOL       | LE009  | 9,10-EODE-leukotoxin A              |                          |
| 1989 C23 | E | 541    | 1120   | -0.19487675 | 821    | 1320   | 0.85748036  | 86129   | -3.96855106 | 81918     | -3.31898783 | empty        |              |        |                                     |                          |
| 1989 C24 | P | 195927 | 197040 | 253.577696  | 166786 | 168040 | 594.074739  | 2205853 | -0.08474186 | 2050118   | -0.05653024 | empty        |              |        |                                     |                          |
| 1989 D01 | N | 292    | 320    | -0.51828462 | 396    | 400    | -0.66154915 | 2772884 | 0.95418596  | 2243081   | 0.26332221  | empty        |              |        |                                     |                          |
| 1989 D02 | E | 117    | 120    | -0.74557931 | 117    | 120    | -1.65874734 | 80286   | -3.97925674 | 84590     | -3.31455876 | empty        |              |        |                                     |                          |
| 1989 D03 | X | 336    | 360    | -0.46113624 | 395    | 400    | -0.66512333 | 1482659 | -1.40979527 | 1437028   | -1.07277865 | experimental | BIOMOL       | CA-225 | Flunarizine dihydrochloride         |                          |
| 1989 D04 | X | 1645   | 1680   | 1.23902803  | 474    | 480    | -0.38276255 | 2197279 | -0.10045134 | 1507243   | -0.95639137 | experimental | BIOMOL       | EI-207 | EBELEN                              |                          |
| 1989 D05 | X | 343    | 360    | -0.45204446 | 274    | 280    | -1.09759997 | 1458722 | -1.45365321 | 1256927   | -1.37131126 | experimental | BIOMOL       | AC-116 | FLUSPIRILINE                        |                          |
| 1989 D06 | X | 502    | 520    | -0.245531   | 593    | 600    | 0.04256571  | 2930021 | 1.24209614  | 2144500   | 0.09991589  | experimental | BIOMOL       | CM-266 | TRIM                                |                          |
| 1989 D07 | X | 555    | 560    | -0.17669318 | 1032   | 1040   | 1.61163384  | 2496048 | 0.44696039  | 2051669   | -0.05395933 | experimental | BIOMOL       | CA-245 | FPL-64176                           |                          |
| 1989 D08 | X | 273    | 280    | -0.54296233 | 552    | 560    | -0.10397596 | 2656841 | 0.74156919  | 2228881   | 0.23978451  | experimental | BIOMOL       | PD-195 | zardaverine                         |                          |
| 1989 D09 | X | 514    | 520    | -0.22994508 | 714    | 720    | 0.47504235  | 2101664 | -0.27563944 | 2043562   | -0.06726479 | experimental | BIOMOL       | CA-422 | gingerol                            |                          |
| 1989 D10 | X | 554    | 560    | -0.177992   | 474    | 480    | -0.38276255 | 2636394 | 0.7041057   | 2579463   | 0.82090376  | experimental | BIOMOL       | PD-190 | zaprinst                            |                          |
| 1989 D11 | X | 394    | 400    | -0.38580429 | 514    | 520    | -0.23979507 | 2519883 | 0.49063145  | 1964722   | -0.19808132 | experimental | BIOMOL       | AC-120 | GLIPIZIDE                           |                          |
| 1989 D12 | X | 435    | 440    | -0.33255239 | 514    | 520    | -0.23979507 | 2376399 | 0.22773662  | 2321894   | 0.39396141  | experimental | BIOMOL       | PD-185 | vinpocetine                         |                          |
| 1989 D13 | X | 352    | 360    | -0.44035502 | 513    | 520    | -0.24336926 | 2322626 | 0.12921244  | 2271864   | 0.31103246  | experimental | BIOMOL       | KC-120 | GLYBURIDE                           |                          |
| 1989 D14 | X | 355    | 360    | -0.43645854 | 554    | 560    | -0.811665   | 2108443 | -0.2632188  | 1894853   | -0.31389508 | experimental | BIOMOL       | PD-180 | Trequin                             |                          |
| 1989 D15 | X | 353    | 360    | -0.43905619 | 395    | 400    | 0.04971408  | 2258305 | 0.01136196  | 2279121   | 0.32306155  | experimental | BIOMOL       | NA-135 | GRAVINSANTOXIN III                  |                          |
| 1989 D16 | X | 715    | 720    | 0.03111911  | 554    | 560    | -0.09682759 | 2514061 | 1.21285385  | 2181668   | 0.65157171  | experimental | BIOMOL       | PD-179 | siguzodan                           |                          |
| 1989 D17 | X | 472    | 480    | -0.284958   | 354    | 360    | -0.811665   | 2297624 | -0.73153777 | 207083017 | -0.01364688 | experimental | BIOMOL       | CM-101 | IAA-94                              |                          |
| 1989 D18 | X | 593    | 600    | -0.12733776 | 474    | 480    | -0.38276255 | 2361682 | 0.20077178  | 2434115   | 0.57997719  | experimental | BIOMOL       | PD-175 | Rolipram                            |                          |
| 1989 D19 | X | 673    | 680    | -0.02343161 |        |        |             |         |             |           |             |              |              |        |                                     |                          |

|          |   |        |            |             |        |            |             |            |             |          |             |              |        |        |                                        |
|----------|---|--------|------------|-------------|--------|------------|-------------|------------|-------------|----------|-------------|--------------|--------|--------|----------------------------------------|
| 1989 E13 | X | 993    | 1000       | 0.39219296  | 394    | 400        | -0.66869752 | 2749235    | 0.91085569  | 1992042  | -0.15279611 | experimental | BIOMOL | L-134  | 1-acyl-PAF                             |
| 1989 E14 | X | 673    | 680        | -0.02343161 | 475    | 480        | -0.37918837 | 2484272    | 0.42538412  | 2155180  | 0.11761889  | experimental | BIOMOL | FA023  | linoleamide                            |
| 1989 E15 | X | 513    | 520        | -0.23124399 | 393    | 400        | -0.67227171 | 2417570    | 0.30317111  | 2139493  | 0.09161636  | experimental | BIOMOL | DG-140 | 1-HEXADECYL-2-ARACHIDONOYL-GLYCEROL    |
| 1989 E16 | X | 715    | 640        | -0.07668351 | 715    | 720        | 0.47861653  | 2376192    | 0.23102188  | 2203448  | 0.19367717  | experimental | BIOMOL | FA014  | linoleic acid                          |
| 1989 E17 | X | 754    | 750        | 0.08177336  | 355    | 360        | -0.80809702 | 2567819    | 0.57846609  | 21010668 | -0.12192195 | experimental | BIOMOL | L-106  | 1-hexadecyl-2-methylglycero-3-PC       |
| 1989 E18 | X | 709    | 720        | 0.02332615  | 553    | 560        | -0.10040177 | 2397801    | 0.26694988  | 2427853  | 0.56595739  | experimental | BIOMOL | FA005  | linolenic acid(18:3,n-3)               |
| 1989 E19 | X | 792    | 800        | 0.13112877  | 634    | 640        | 0.18910738  | 2507015    | 0.46705439  | 2466781  | 0.63412384  | experimental | BIOMOL | EI-150 | 1-HEXADECYL-2-O-ACETYL-GLYCEROL        |
| 1989 E20 | X | 952    | 960        | 0.33894106  | 592    | 600        | 0.03899152  | 2594687    | 0.62768913  | 2500483  | 0.68998775  | experimental | BIOMOL | LXA004 | lipoxin A4                             |
| 1989 E21 | X | 551    | 560        | -0.18188848 | 591    | 600        | 0.03541733  | 2461677    | 0.38398502  | 2292873  | 0.34585665  | experimental | BIOMOL | EI-149 | 1-HEXADECYL-2-O-METHYL-GLYCEROL        |
| 1989 E22 | X | 750    | 760        | 0.07657805  | 1031   | 1040       | 1.60805965  | 2527405    | 0.50441344  | 2239906  | 0.25805938  | experimental | BIOMOL | LP101  | L-NASPA                                |
| 1989 E23 | E | 535    | 1080       | -0.20266971 | 839    | 1360       | 0.92181573  | 89825      | -3.96177916 | 82953    | -3.17727223 | empty        |        |        |                                        |
| 1989 E24 | P | 184257 | 185320     | 238.420387  | 174714 | 175920     | 622.376446  | 2307238    | 0.10101818  | 2147665  | 0.10436665  | empty        |        |        |                                        |
| 1989 F01 | N | 477    | 480        | -0.27800167 | 396    | 400        | -0.66154915 | 2379888    | 0.23412925  | 1929534  | -0.2564084  | empty        |        |        |                                        |
| 1989 F02 | E | 160    | 160        | -0.69362624 | 77     | 80         | -1.80171482 | 78085      | -3.98328947 | 82905    | -3.31735179 | empty        |        |        |                                        |
| 1989 F03 | X | 435    | 440        | -0.33255239 | 475    | 480        | -0.37918837 | 1819828    | -0.79202613 | 1491727  | -0.98211044 | experimental | BIOMOL | AC-110 | LOPERAMIDE                             |
| 1989 F04 | X | 675    | 680        | -0.02083396 | 594    | 600        | 0.0461399   | 2293543    | 0.07592587  | 1879903  | -0.33867597 | experimental | BIOMOL | EI-145 | A-3                                    |
| 1989 F05 | X | 312    | 320        | -0.49230809 | 514    | 520        | -0.23979507 | 1972050    | -0.51312133 | 2143372  | 0.09804613  | experimental | BIOMOL | AC-103 | METHOXY VERAPAMIL                      |
| 1989 F06 | X | 874    | 880        | 0.23763257  | 633    | 640        | 0.18553319  | 2513266    | 0.47850762  | 2329258  | 0.40616786  | experimental | BIOMOL | AG-200 | acetyl-farnesyl-cysteine               |
| 1989 F07 | X | 632    | 640        | -0.07668351 | 833    | 840        | 0.90037061  | 2446980    | 0.35705682  | 2549614  | 0.77142853  | experimental | BIOMOL | KC-125 | minoxidil                              |
| 1989 F08 | X | 792    | 800        | 0.13112877  | 512    | 520        | -0.24694344 | 2104167    | -0.27105339 | 1814327  | -0.44737372 | experimental | BIOMOL | GR300  | actinomycin D                          |
| 1989 F09 | X | 753    | 760        | 0.08047453  | 755    | 760        | 0.62158402  | 2477207    | 0.41243946  | 2144602  | 0.10008496  | experimental | BIOMOL | KC-130 | minoxidil sulfate                      |
| 1989 F10 | X | 674    | 680        | -0.02213279 | 554    | 560        | -0.111665   | 2189193    | -0.11526671 | 1886501  | -0.32773923 | experimental | BIOMOL | VR101  | Arvanil                                |
| 1989 F11 | X | 554    | 560        | -0.177992   | 315    | 320        | -0.23622088 | 1456690    | -1.45737629 | 1201339  | -1.46345306 | experimental | BIOMOL | AC-108 | Nicardipine hydrochloride              |
| 1989 F12 | X | 313    | 320        | -0.49100926 | 314    | 320        | -0.95463249 | 1940161    | -0.57154912 | 1740767  | -0.56930563 | experimental | BIOMOL | EI-277 | AG1478                                 |
| 1989 F13 | X | 673    | 680        | -0.02343161 | 515    | 520        | -0.23622088 | 1818953    | -0.11570644 | 1965139  | -0.19739011 | experimental | BIOMOL | CA-210 | NIFEDIPINE                             |
| 1989 F14 | X | 440    | 440        | -0.33515005 | 434    | 440        | -0.38276255 | 2502642    | 0.45904208  | 2249411  | 0.27638942  | experimental | BIOMOL | AG-158 | AG221 (Tyrphostin 47)                  |
| 1989 F15 | X | 794    | 800        | 0.133022643 | 755    | 760        | 0.62158402  | 2382928    | 0.23969277  | 2240840  | 0.25960757  | experimental | BIOMOL | AC-134 | NIFLUMIC ACID                          |
| 1989 F16 | X | 593    | 600        | -0.12733776 | 394    | 400        | -0.66869752 | 2697028    | 0.81520077  | 2290296  | 0.34158506  | experimental | BIOMOL | EI-229 | tyrphostin AG-370                      |
| 1989 F17 | X | 229    | 240        | -0.60011071 | 193    | 200        | -1.38710912 | 1051491    | -2.19979163 | 1044129  | -1.7240419  | experimental | BIOMOL | CA-216 | NIQUILIPINE                            |
| 1989 F18 | X | 1673   | 1680       | 1.27539518  | 955    | 960        | 1.33642143  | 2334000    | 0.15005215  | 2187025  | 0.17040466  | experimental | BIOMOL | EI-272 | AG-490                                 |
| 1989 F19 | X | 508    | 520        | -0.23773804 | 432    | 440        | -0.53287841 | 2433261    | 0.33192054  | 2322014  | 0.39416032  | experimental | BIOMOL | CA-211 | NIMODIPINE                             |
| 1989 F20 | X | 712    | 720        | 0.02722263  | 832    | 840        | 0.89679642  | 1598326    | -1.19786741 | 1764180  | -0.53049661 | experimental | BIOMOL | EI-258 | AG-879                                 |
| 1989 F21 | X | 631    | 640        | -0.07798234 | 712    | 720        | 0.46789397  | 2346636    | 0.17320414  | 2038010  | -0.07660027 | experimental | BIOMOL | CA-212 | NITREDIPINE                            |
| 1989 F22 | E | 840    | 0.18178302 | 548         | 840    | 0.93617972 | 2047111     | 1.37555523 | 72889232    | 1649663  | 0.72889232  | empty        |        |        |                                        |
| 1989 F23 | E | 491    | 1000       | -0.25981809 | 990    | 1560       | 1.46151798  | 85509      | -3.96968704 | 84428    | -3.31482729 | empty        |        |        |                                        |
| 1989 F24 | P | 171448 | 172680     | 221.783714  | 192599 | 193560     | 686.30793   | 2139322    | -0.20664155 | 2099005  | 0.02450408  | empty        |        |        |                                        |
| 1989 G01 | N | 517    | 520        | -0.22604859 | 517    | 520        | -0.22907251 | 2114283    | -0.25251861 | 2159793  | 0.12526532  | empty        |        |        |                                        |
| 1989 G02 | E | 77     | 80         | -0.79753238 | 77     | 80         | -1.80171482 | 86579      | -3.96772656 | 83711    | -3.31601578 | empty        |        |        |                                        |
| 1989 G03 | X | 274    | 280        | -0.54166351 | 475    | 480        | -0.37918837 | 2588047    | 0.61552317  | 2471590  | 0.64209516  | experimental | BIOMOL | L-108  | 1-octadecyl-2-methylglycero-3-PC       |
| 1989 G04 | X | 592    | 600        | -0.12863659 | 432    | 440        | -0.53287841 | 2624680    | 0.68264203  | 2194923  | 0.18349626  | experimental | BIOMOL | RA101  | LY-171883                              |
| 1989 G05 | X | 673    | 680        | -0.02343161 | 473    | 480        | -0.34023989 | 2687738    | 0.79817941  | 2396381  | 0.9381723   | experimental | BIOMOL | DG-125 | 1-octadecyl-2-acetylglcyrol            |
| 1989 G06 | X | 632    | 640        | 0.07668351  | 434    | 440        | -0.52573004 | 2343319    | 0.16712665  | 2099201  | 0.02488289  | experimental | BIOMOL | L101   | LY-CL16-PAF                            |
| 1989 G07 | X | 554    | 560        | -0.177992   | 634    | 640        | 0.18910738  | 2773092    | 0.95456706  | 2380095  | 0.49043448  | experimental | BIOMOL | DG-135 | 1-STEAROYL-2-LINOLEOYL-GLYCEROL        |
| 1989 G08 | X | 633    | 640        | -0.07538469 | 594    | 600        | 0.0461399   | 2981631    | 1.33665722  | 1990805  | -0.15484655 | experimental | BIOMOL | LP100  | lysophosphatidic acid                  |
| 1989 G09 | X | 353    | 360        | -0.43905619 | 593    | 600        | 0.04256571  | 2434899    | 0.33492172  | 2718519  | 1.05140082  | experimental | BIOMOL | DG-130 | 1-STEAROYL-2-ARACHIDONOYL-GLYCEROL     |
| 1989 G10 | X | 394    | 400        | -0.38580429 | 593    | 600        | -0.24336922 | 2298298    | 0.08463809  | 2270773  | 0.30922404  | experimental | BIOMOL | SL221  | D-erythro-MAPP                         |
| 1989 G11 | X | 354    | 360        | -0.43775736 | 554    | 560        | -0.09682759 | 2435283    | 0.33562533  | 2341884  | 0.42770952  | experimental | BIOMOL | DM300  | 24,25-dihydroxyvitamin D3              |
| 1989 G12 | X | 555    | 560        | -0.177992   | 434    | 440        | -0.52573004 | 2426003    | 0.31862226  | 2265092  | 0.27638945  | experimental | BIOMOL | SL222  | MAPP, L-erythro                        |
| 1989 G13 | X | 795    | 800        | 0.13502525  | 355    | 360        | -0.80809702 | 2691050    | 0.2802560   | 2282650  | 0.32891117  | experimental | BIOMOL | DM100  | 25-hydroxyvitamin                      |
| 1989 G14 | X | 393    | 400        | -0.38710312 | 394    | 400        | -0.66869752 | 2541479    | 0.53020016  | 2216318  | 0.21896020  | experimental | BIOMOL | FA004  | MEAD ACID (20:3 n-9)                   |
| 1989 G15 | X | 428    | 440        | -0.34164418 | 429    | 440        | -0.54360097 | 3011416    | 1.39123001  | 2711168  | 1.03921591  | experimental | BIOMOL | FA028  | 2-arachidonylglycerol                  |
| 1989 G16 | X | 674    | 680        | -0.02213279 | 475    | 480        | -0.37918837 | 2575791    | 0.59306743  | 2329760  | 0.40699997  | experimental | BIOMOL | FA027  | MEAD                                   |
| 1989 G17 | X | 634    | 640        | -0.07408586 | 555    | 560        | -0.09325234 | 3256248    | 1.83981708  | 2897332  | 1.34779845  | experimental | BIOMOL | G231   | 2-FLUOROPALMITIC ACID                  |
| 1989 G18 | X | 868    | 880        | 0.22983961  | 513    | 520        | -0.24336922 | 2404381    | 0.27900591  | 2372857  | 0.47843688  | experimental | BIOMOL | GR106  | METHOPRENE ACID                        |
| 1989 G19 | X | 833    | 840        | 0.18438067  | 433    | 440        | -0.52930422 | 3492113    | 2.2719746   | 2669122  | 0.96952112  | experimental | BIOMOL | G230   | 2-hydroxymyristic acid                 |
| 1989 G20 | X | 548    | 560        | -0.18578496 | 871    | 880        | 1.03618972  | 2808112    | 1.01873154  | 2482963  | 0.66094687  | experimental | BIOMOL | PG-052 | misoprostol                            |
| 1989 G21 | X | 952    | 960        | 0.33894106  | 791    | 800        | 0.75025475  | 2676877    | 0.77827963  | 2046343  | -0.06278762 | experimental | BIOMOL | GR103  | 4-HYDROXYPHENYLETANAMIDE               |
| 1989 G22 | X | 828    | 840        | 0.17788654  | 710    | 720        | 0.4607456   | 2408071    | 0.28576682  | 1969991  | -0.18934751 | experimental | BIOMOL | SL-105 | N,N-dimethylsphingosine                |
| 1989 G23 | E | 498    | 1200       | -0.2507263  | 782    | 1240       | 0.71808707  | 88128      | -3.96488844 | 83029    | -3.31714625 | empty        |        |        |                                        |
| 1989 G24 | P | 238042 | 239160     | 308.277786  | 153426 | 154480     | 546.296299  | 2981442    | 1.33631093  | 2180981  | 0.16038622  | empty        |        |        |                                        |
| 1989 H01 | N | 597    | 600        | -0.12214245 | 436    | 440        | -0.51858166 | 2615571    | 0.66595333  | 1954342  | -0.21528704 | empty        |        |        |                                        |
| 1989 H02 | E | 75     | 80         | -0.80013004 | 116    | 120        | -1.66232153 | 74569      | -3.98973157 | 84709    | -3.31436151 | empty        |        |        |                                        |
| 1989 H03 | X | 995    | 1000       | 0.39479061  | 673    | 680        | 0.32850067  | 2506005    | 0.46520385  | 2642756  | 0.92581725  | experimental | BIOMOL | AC-132 | N-PHENYLANTHRANILIC                    |
| 1989 H04 | X | 951    | 960        | 0.33764223  | 1312   | 1320       | 2.61240622  | 3018083    | 1.40344545  | 3095951  | 1.67702621  | experimental | BIOMOL | E1303  | AG-1296                                |
| 1989 H05 | X | 752    | 760        | 0.0791757   | 912    | 920        | 1.18273139  | 2130636    | -0.22255625 | 1974760  | -0.18144249 | experimental | BIOMOL | CM-100 | 2-PHENYLPROPYLAMINO-5-NITROBENZIC ACID |
| 1989 H06 | X | 473    | 480        | -0.28319697 | 473    | 480        | -0.38633674 | 3085459    | 1.52689338  | 2629455  | 0.90376972  | experimental | BIOMOL | PD-152 | Milrinone                              |
| 1989 H07 | X | 273    | 280        | -0.54296233 | 353    | 360        | -0.81523919 | 1928260    | -0.59335441 | 2348027  | 0.43727906  | experimental | BIOMOL | KC-127 | NS-1619                                |
| 1989 H08 | X | 554    | 560        | -0.177992   | 394    | 400        | -0.66869752 | 3479052    | 2.24804392  | 3046709  | 1.59540344  | experimental | BIOMOL | GR333  | PRIMA-1                                |
| 1989 H09 | X | 514    | 520        | -0.22994508 | 474    | 480        | -0.38276255 | 1960177    | -0.53487532 | 1935681  | -0.24621923 | experimental | BIOMOL | KC-155 | PAXILLINE                              |
| 1989 H10 | X | 554    | 560        | -0.177992   | 753    | 760        | 0.61443564  | 2745254    | 0.9108809   | 160932   | 0.87124294  | experimental | BIOMOL | E1312  | tanugamycin                            |
| 1989 H11 | X | 394    | 400        | -0.38580429 | 752    | 760        | 0.61086145  | 2428330    | 0.32288585  | 2141066  | 0.09422374  | experimental | BIOMOL | KC-131 | PCO-400                                |
| 1989 H12 | X | 395    | 400        | -0.38450546 | 714    | 720        | 0.47504235  | 2728353    | 0.87259519  | 2139090  | 0.09094835  | experimental | BIOMOL | AP-101 | 4-Amino-1,8-naphthalimide              |
| 1989 H13 | X | 233</  |            |             |        |            |             |            |             |          |             |              |        |        |                                        |

|          |   |        |        |             |        |        |             |         |             |         |             |              |        |        |                                     |
|----------|---|--------|--------|-------------|--------|--------|-------------|---------|-------------|---------|-------------|--------------|--------|--------|-------------------------------------|
| 1989 107 | X | 674    | 680    | -0.02213279 | 875    | 880    | 1.05048646  | 2988377 | 1.3490174   | 2406824 | 0.53474005  | experimental | BIOMOL | HP005  | 5(S)-HPETE                          |
| 1989 108 | X | 513    | 520    | -0.2312439  | 474    | 480    | -0.38276255 | 2611212 | 0.65796664  | 2198773 | 0.18987796  | experimental | BIOMOL | FA-030 | N-LINOLEOYLGLYCINE                  |
| 1989 109 | X | 674    | 680    | -0.02213279 | 395    | 360    | -0.80089082 | 2753131 | 0.91799404  | 2466866 | 0.63426473  | experimental | BIOMOL | EE56   | 5,6-EPOXYEICOSATRIENOIC ACID        |
| 1989 110 | X | 673    | 680    | -0.0234161  | 513    | 520    | -0.24338926 | 2242442 | -0.01770261 | 2342775 | 0.42807615  | experimental | BIOMOL | L100   | PAF C16                             |
| 1989 111 | X | 594    | 600    | -0.12603893 | 754    | 800    | -0.16203893 | 2266226 | 0.08815756  | 2349859 | 0.44031576  | experimental | BIOMOL | ET004  | 5,8,11,14-eicosatetraenoic acid     |
| 1989 112 | X | 514    | 520    | -0.22994508 | 552    | 560    | -0.10397596 | 2252921 | 0.00149726  | 2261390 | 0.29367093  | experimental | BIOMOL | L105   | PAF C18                             |
| 1989 113 | X | 635    | 640    | -0.07278703 | 554    | 560    | -0.09682759 | 2332565 | 0.14742291  | 2200559 | 0.19283841  | experimental | BIOMOL | ET003  | 5,8,11-eicosatriynoic               |
| 1989 114 | X | 433    | 440    | -0.33515005 | 514    | 520    | -0.23979507 | 2182620 | -0.12730992 | 2374724 | 0.48153159  | experimental | BIOMOL | L107   | PAF C18:1                           |
| 1989 115 | X | 548    | 560    | -0.18578496 | 469    | 480    | -0.40063349 | 2367149 | 0.21078855  | 2541149 | 0.75739507  | experimental | BIOMOL | K005   | 5-KETOEICOSATETRAENOIC ACID         |
| 1989 116 | X | 634    | 640    | -0.07408586 | 435    | 440    | -0.52215585 | 2215568 | -0.0669418  | 2473010 | 0.64444893  | experimental | BIOMOL | FA018  | PALMITYLETHANOLAMIDE                |
| 1989 117 | X | 754    | 760    | 0.08177336  | 434    | 440    | -0.52573004 | 2712158 | 0.84292232  | 2299759 | 0.35727078  | experimental | BIOMOL | GR206  | 6-formylindolo-(3,2-beta)-carbazole |
| 1989 118 | X | 551    | 560    | -0.18188848 | 833    | 840    | 0.90037061  | 2206874 | 0.10035125  | 2348577 | 0.41017756  | experimental | BIOMOL | LF103  | PHOSPHATIDIC ACID, DIPALMITOYL      |
| 1989 119 | X | 831    | 840    | 0.18178302  | 832    | 840    | 0.89679642  | 2918989 | 1.22188305  | 2563104 | 0.79378734  | experimental | BIOMOL | PG017  | 6-keto-prostaglandin F1a            |
| 1989 120 | X | 949    | 960    | 0.33504458  | 710    | 720    | 0.4607456   | 2628816 | 0.69022111  | 2452906 | 0.61112486  | experimental | BIOMOL | PG001  | prostaglandin A1                    |
| 1989 121 | X | 792    | 800    | 0.13112877  | 793    | 800    | 0.75740312  | 2850538 | 1.09646548  | 2190279 | 0.17579844  | experimental | BIOMOL | EI-112 | 7,7-dimethyleicosadienoic acid      |
| 1989 122 | X | 749    | 760    | 0.07527922  | 469    | 480    | -0.40063349 | 2925461 | 1.2337412   | 2322588 | 0.39511177  | experimental | BIOMOL | PG002  | PROSTAGLANDIN A2                    |
| 1989 123 | E | 653    | 1280   | -0.04940815 | 976    | 1520   | 1.41147936  | 86207   | -3.96840815 | 82849   | -3.31744462 | empty        |        |        |                                     |
| 1989 124 | P | 211568 | 212880 | 273.892645  | 183708 | 184640 | 654.529832  | 2432852 | 0.33117116  | 2320425 | 0.39152642  | empty        |        |        |                                     |
| 1989 101 | N | 1037   | 1040   | 0.44934134  | 475    | 480    | -0.37918837 | 1986867 | -0.48597326 | 2204446 | -0.09083375 | empty        |        |        |                                     |
| 1989 102 | E | 115    | 120    | -0.74817697 | 115    | 120    | -1.66589571 | 78767   | -3.98203989 | 83392   | -3.31654455 | empty        |        |        |                                     |
| 1989 103 | X | 595    | 600    | -0.1247401  | 836    | 840    | 0.91109317  | 2468869 | 0.39716237  | 1880028 | -0.33846877 | experimental | BIOMOL | AC-118 | pinacidil                           |
| 1989 104 | X | 313    | 320    | -0.49100926 | 593    | 600    | 0.04256571  | 2333814 | 0.14971136  | 2132453 | 0.07994697  | experimental | BIOMOL | PD-150 | 8-methoxymethyl-IBMX                |
| 1989 105 | X | 513    | 520    | -0.2312439  | 393    | 400    | -0.67227171 | 2460885 | 0.3825339   | 2149233 | 0.10776123  | experimental | BIOMOL | AC-127 | PROCAINAMIDE                        |
| 1989 106 | X | 1394   | 1400   | 0.91302251  | 1394   | 1320   | 2.61955599  | 2044250 | -3.8083475  | 1722285 | -0.5999411  | experimental | BIOMOL | PD-149 | MBCQ                                |
| 1989 107 | X | 551    | 560    | -0.18188848 | 231    | 240    | -1.25129001 | 1511883 | -1.35625035 | 1239857 | -1.39960622 | experimental | BIOMOL | AC-124 | PROCAFENONE HYDROCHLORIDE           |
| 1989 108 | X | 514    | 560    | -0.22994508 | 435    | 440    | -0.52215585 | 2286533 | 0.06330508  | 1947777 | -0.23204942 | experimental | BIOMOL | G-581  | quindine                            |
| 1989 109 | X | 473    | 480    | -0.28319697 | 395    | 400    | -0.66572335 | 2433391 | 0.3881587   | 2374332 | 0.48088182  | experimental | BIOMOL | AC-129 | quindine                            |
| 1989 110 | X | 513    | 520    | -0.2312439  | 475    | 480    | -0.37918837 | 2517778 | 0.48677462  | 2264165 | 0.29827072  | experimental | BIOMOL | GR-244 | BADGE                               |
| 1989 111 | X | 555    | 560    | -0.17669318 | 352    | 360    | -0.81881338 | 1989860 | -0.48048942 | 1806869 | -0.45671918 | experimental | BIOMOL | AC-122 | QUININE                             |
| 1989 112 | X | 314    | 320    | -0.48971043 | 635    | 640    | 0.19268157  | 2324703 | 0.13301797  | 2111377 | 0.04501172  | experimental | BIOMOL | CM110  | bafilomycin A1                      |
| 1989 113 | X | 554    | 560    | -0.177992   | 514    | 520    | -0.23979507 | 2337016 | 0.15557814  | 2297051 | 0.35278204  | experimental | BIOMOL | NA-134 | QX-314                              |
| 1989 114 | X | 514    | 520    | -0.22994508 | 475    | 480    | -0.37918837 | 2503661 | 0.46090911  | 2434898 | 0.58127508  | experimental | BIOMOL | CA-411 | BAPTA-AM                            |
| 1989 115 | X | 634    | 640    | -0.07408586 | 433    | 440    | -0.52930422 | 2351740 | 0.18255581  | 2258908 | 0.2895568   | experimental | BIOMOL | CA-450 | RYANODINE                           |
| 1989 116 | X | 473    | 480    | -0.28319697 | 395    | 400    | -0.66572335 | 2343262 | 0.14142434  | 2186702 | 0.14142434  | experimental | BIOMOL | EI-115 | betanotins                          |
| 1989 117 | X | 471    | 480    | -0.28579463 | 351    | 360    | -0.82238756 | 1658435 | -1.08773426 | 1302216 | -1.29624092 | experimental | BIOMOL | NA-116 | SDZ-201106                          |
| 1989 118 | X | 513    | 520    | -0.2312439  | 593    | 600    | 0.04256571  | 2576482 | 0.5943335   | 2680566 | 0.98849052  | experimental | BIOMOL | CM-113 | bongkrekic acid                     |
| 1989 119 | X | 993    | 1000   | 0.39219296  | 712    | 720    | 0.46789397  | 1845789 | -0.74445976 | 1619488 | -0.77033581 | experimental | BIOMOL | CA-230 | SKF-96365                           |
| 1989 120 | X | 471    | 480    | -0.28579463 | 713    | 720    | 0.47146816  | 2565341 | 0.57392069  | 2213163 | 0.2137306   | experimental | BIOMOL | AC-582 | IB-MECA                             |
| 1989 121 | X | 513    | 520    | -0.2312439  | 471    | 480    | -0.39348511 | 1287385 | -1.76758098 | 1160614 | -1.53095818 | experimental | BIOMOL | CA-260 | Tetrandrine                         |
| 1989 122 | X | 509    | 520    | -0.23643921 | 631    | 640    | 0.17838482  | 1791325 | -0.84425001 | 1718775 | -0.60575923 | experimental | BIOMOL | G405   | brefeldin A                         |
| 1989 123 | E | 1400   | 1400   | 0.26880444  | 952    | 840    | -0.14356989 | 84208   | -0.9720707  | 81201   | -0.32049624 | empty        |        |        |                                     |
| 1989 124 | P | 238382 | 239600 | 708.719387  | 149948 | 151200 | 533.865277  | 2451264 | 0.36490607  | 2108392 | 0.04006383  | empty        |        |        |                                     |
| 1989 K01 | N | 395    | 400    | -0.38450546 | 717    | 720    | 0.48576491  | 2008972 | -0.44547195 | 2048120 | -0.0598421  | empty        |        |        |                                     |
| 1989 K02 | E | 156    | 160    | -0.69492507 | 116    | 120    | -1.66232153 | 84214   | -3.97205977 | 84439   | -3.31480906 | empty        |        |        |                                     |
| 1989 K03 | X | 795    | 800    | 0.13502525  | 355    | 360    | -0.80089082 | 2746262 | 0.90540049  | 2123642 | 0.06534199  | experimental | BIOMOL | EE89   | 8,9-EPOXYEICOSATRIENOIC ACID        |
| 1989 K04 | X | 834    | 840    | 0.1856795   | 635    | 640    | 0.19268157  | 2019327 | -0.42649827 | 2416186 | 0.55025836  | experimental | BIOMOL | PG003  | prostaglandin B1                    |
| 1989 K05 | X | 393    | 400    | -0.38710312 | 274    | 280    | -1.09759997 | 2671566 | 0.76054868  | 2193983 | 0.18193813  | experimental | BIOMOL | PG049  | 8-EPI-PROSTAGLANDIN F2a             |
| 1989 K06 | X | 391    | 400    | -0.38974077 | 514    | 520    | -0.24338926 | 2531548 | 0.51200434  | 2365777 | 0.81141243  | experimental | BIOMOL | PG057  | PROSTAGLANDIN B2                    |
| 1989 K07 | X | 514    | 520    | -0.22994508 | 474    | 480    | -0.38276255 | 2758857 | 0.688914656 | 2758857 | 1.15012258  | experimental | BIOMOL | H0409  | 9(S)-HODE                           |
| 1989 K08 | X | 473    | 480    | -0.28319697 | 474    | 480    | -0.38276255 | 2734116 | 0.8831543   | 2258800 | 0.28937778  | experimental | BIOMOL | PG005  | PROSTAGLANDIN D2                    |
| 1989 K09 | X | 674    | 680    | -0.02213279 | 435    | 440    | -0.52215585 | 2743849 | 0.90098733  | 2608525 | 0.86907648  | experimental | BIOMOL | HP019  | 9(S)-HPODE                          |
| 1989 K10 | X | 594    | 600    | -0.12603893 | 394    | 400    | -0.66869752 | 2482220 | 0.4216244   | 2546057 | 0.7655305   | experimental | BIOMOL | PG006  | prostaglandin E1                    |
| 1989 K11 | X | 394    | 400    | -0.38580429 | 680    | 680    | 0.33564905  | 2580445 | 0.6015946   | 2373403 | 0.47934192  | experimental | BIOMOL | FA025  | 9,10-octadecenoamide                |
| 1989 K12 | X | 475    | 480    | -0.28059932 | 394    | 400    | -0.66869752 | 2520712 | 0.49215036  | 2221204 | 0.22705924  | experimental | BIOMOL | PG007  | prostaglandin E2                    |
| 1989 K13 | X | 554    | 560    | -0.177992   | 435    | 440    | -0.52215585 | 2811197 | 1.02438395  | 2320283 | 0.39129104  | experimental | BIOMOL | PG031  | 9A,11B-prostaglandin F2             |
| 1989 K14 | X | 473    | 480    | -0.28319697 | 353    | 360    | -0.81523919 | 2475567 | 0.40961783  | 2433956 | 0.57971363  | experimental | BIOMOL | PG010  | prostaglandin F1a                   |
| 1989 K15 | X | 714    | 720    | 0.02982028  | 675    | 680    | 0.33564905  | 2959352 | 1.2958371   | 2484742 | 0.66389571  | experimental | BIOMOL | PG030  | 9,11A-prostaglandin                 |
| 1989 K16 | X | 511    | 520    | -0.23384156 | 431    | 440    | -0.5364526  | 2672957 | 0.77109731  | 2497886 | 0.685683    | experimental | BIOMOL | PG008  | Dinoprost trometamol                |
| 1989 K17 | X | 1474   | 1480   | 0.101692865 | 1595   | 1600   | 3.62390116  | 2509004 | 0.47069868  | 2807838 | 1.1994546   | experimental | BIOMOL | GR101  | 9-cis-retinoic                      |
| 1989 K18 | X | 550    | 560    | -0.11112434 | 550    | 560    | -0.11112434 | 2687513 | 0.79776716  | 2577236 | 0.81721232  | experimental | BIOMOL | PG011  | PROSTAGLANDIN I2                    |
| 1989 K19 | X | 553    | 560    | -0.17929083 | 553    | 560    | -0.10040177 | 2710492 | 0.83986984  | 2498393 | 0.6865234   | experimental | BIOMOL | G200   | acetyl-farnesyl-cysteine            |
| 1989 K20 | X | 513    | 520    | -0.2312439  | 592    | 600    | 0.03899152  | 2727700 | 0.87139875  | 2697881 | 1.01719159  | experimental | BIOMOL | PG033  | prostaglandin                       |
| 1989 K21 | X | 752    | 760    | 0.0791757   | 953    | 960    | 1.32927306  | 2767601 | 0.94450632  | 2365771 | 0.47332158  | experimental | BIOMOL | FA011  | adrenic                             |
| 1989 K22 | X | 991    | 1000   | 0.38959531  | 910    | 920    | 1.17558301  | 2541304 | 0.52987952  | 2312614 | 0.37857903  | experimental | BIOMOL | GR100  | trans-retinoic acid                 |
| 1989 K23 | E | 632    | 1240   | -0.07668351 | 755    | 1480   | 0.62158402  | 85257   | -3.97014876 | 82171   | -3.31856846 | empty        |        |        |                                     |
| 1989 K24 | P | 204974 | 206280 | 265.328182  | 245460 | 246480 | 875.243033  | 2331947 | 0.1462906   | 2371574 | 0.4763102   | empty        |        |        |                                     |
| 1989 L01 | N | 637    | 640    | -0.07018938 | 596    | 600    | 0.05328827  | 2173572 | -0.14388788 | 2226015 | 0.23503388  | empty        |        |        |                                     |
| 1989 L02 | E | 117    | 120    | -0.74557931 | 117    | 120    | -1.65874734 | 75093   | -3.98877148 | 81435   | -3.31978844 | empty        |        |        |                                     |
| 1989 L03 | X | 114    | 120    | -0.74947579 | 156    | 160    | -1.51935404 | 928833  | -2.44245286 | 950733  | -1.87885365 | experimental | BIOMOL | PE-180 | THAPSIGARGIN                        |
| 1989 L04 | X | 594    | 600    | -0.12603893 | 514    | 520    | -0.24338926 | 2436459 | 0.33777999  | 2262637 | 0.62332633  | experimental | BIOMOL | CN-252 | 3-bromo-7-nitroindazole             |
| 1989 L05 | X | 553    | 560    | -0.17929083 | 394    | 400    | -0.66869752 | 2298008 | 0.08910675  | 2174774 | 0.18142434  | experimental | BIOMOL | EI-110 | TMB-8                               |
| 1989 L06 | X | 634    | 640    | -0.07408586 | 393    | 400    | -0.67227171 | 2683106 | 0.78969255  | 2653127 | 0.94305779  | experimental | BIOMOL | CN-115 | Bromo-cAMP [8-Bromo-cAMP]           |
| 1989 L07 | X | 673    | 680    | -0.02       |        |        |             |         |             |         |             |              |        |        |                                     |

|          |   |        |        |             |        |        |             |         |             |         |             |              |         |                                         |             |  |  |  |  |
|----------|---|--------|--------|-------------|--------|--------|-------------|---------|-------------|---------|-------------|--------------|---------|-----------------------------------------|-------------|--|--|--|--|
| 1989 M01 | N | 596    | 600    | -0.12344128 | 636    | 640    | 0.19625575  | 1964595 | -0.52678056 | 1915686 | -0.27936263 | empty        |         |                                         |             |  |  |  |  |
| 1989 M02 | E | 116    | 120    | -0.74687814 | 156    | 160    | -1.51935404 | 83649   | -3.97309498 | 80790   | -3.32085758 | empty        |         |                                         |             |  |  |  |  |
| 1989 M03 | X | 518    | 520    | -0.22474977 | 517    | 520    | -0.22907251 | 2136862 | -0.21114882 | 1995849 | -0.14648569 | BIOMOL       | G221    | AGC                                     |             |  |  |  |  |
| 1989 M04 | X | 493    | 400    | -0.38710312 | 714    | 720    | 0.47504235  | 1845231 | -0.74548214 | 1991101 | -0.15435559 | experimental | E1209   | REVA 5901                               |             |  |  |  |  |
| 1989 M05 | X | 794    | 800    | -0.16237306 | 553    | 960    | 1.32927306  | 2237784 | -0.02623711 | 2207203 | 0.93318853  | experimental | G220    | AGGC                                    |             |  |  |  |  |
| 1989 M06 | X | 510    | 520    | -0.23514038 | 747    | 760    | 0.59299052  | 2291874 | 0.07286789  | 1984615 | -0.16510699 | experimental | G-201   | S-FARNESYL-L-CYSTEINE                   |             |  |  |  |  |
| 1989 M07 | X | 473    | 480    | -0.28319697 | 593    | 600    | 0.04256571  | 2782303 | 0.97144367  | 2870913 | 1.30400673  | experimental | CR108   | AM-251                                  |             |  |  |  |  |
| 1989 M08 | X | 754    | 760    | 0.08177336  | 633    | 440    | -0.52930422 | 2371076 | 0.2198369   | 2816988 | 0.16157471  | experimental | E1-155  | SPHINGOSINE                             |             |  |  |  |  |
| 1989 M09 | X | 513    | 520    | -0.2312439  | 435    | 640    | 0.19268157  | 2161456 | -0.1660871  | 2330981 | 0.40902388  | experimental | GR104   | AM-580                                  |             |  |  |  |  |
| 1989 M10 | X | 673    | 680    | -0.02343161 | 474    | 400    | -0.38276255 | 2169054 | -0.15216587 | 2030418 | -0.08918466 | experimental | RA-103  | SQ-29548                                |             |  |  |  |  |
| 1989 M11 | X | 794    | 800    | -0.13726473 | 755    | 760    | 0.62158402  | 2023349 | -0.41913007 | 2515614 | 0.71506866  | experimental | FA026   | anandamide(18:2,n-6)                    |             |  |  |  |  |
| 1989 M12 | X | 593    | 600    | -0.12733776 | 394    | 400    | -0.66869752 | 2162522 | -0.16413395 | 2121768 | 0.05223568  | experimental | L-126   | TETRAHYDROCANNABINOL-7-OIC ACID         |             |  |  |  |  |
| 1989 M13 | X | 514    | 520    | -0.22994508 | 395    | 400    | -0.66512333 | 2299401 | 0.08665904  | 2405034 | 0.53177298  | experimental | FA019   | anandamide(20:3,n-6)                    |             |  |  |  |  |
| 1989 M14 | X | 594    | 600    | -0.12603893 | 514    | 520    | -0.23979507 | 2363868 | 0.20477702  | 2216105 | 0.21860722  | experimental | GR105   | TNFB                                    |             |  |  |  |  |
| 1989 M15 | X | 632    | 640    | -0.07668351 | 474    | 480    | -0.38276255 | 2694475 | 0.8105231   | 2246448 | 0.2689033   | experimental | FA017   | ANANDAMIDE (20:4, n-6)                  |             |  |  |  |  |
| 1989 M16 | X | 1033   | 1040   | 0.44414603  | 754    | 760    | 0.61800983  | 2479125 | 0.41595366  | 2069666 | -0.02412778 | experimental | PG023   | U-46619                                 |             |  |  |  |  |
| 1989 M17 | X | 752    | 760    | 0.0791757   | 673    | 680    | 0.32850067  | 2675008 | 0.7748552   | 2411228 | 0.54204005  | experimental | FA020   | anandamide(22:4,n-6)                    |             |  |  |  |  |
| 1989 M18 | X | 512    | 520    | -0.23254273 | 513    | 520    | -0.24336926 | 2572029 | 0.5861746   | 2393436 | 0.51254831  | experimental | RA102   | U-75302                                 |             |  |  |  |  |
| 1989 M19 | X | 593    | 600    | -0.12733776 | 394    | 400    | -0.66869752 | 2162522 | -0.16413395 | 2121768 | 0.05223568  | experimental | FA022   | ARACHIDONAMIDE                          |             |  |  |  |  |
| 1989 M20 | X | 671    | 680    | -0.02602927 | 553    | 560    | -0.10040177 | 2553015 | 0.5513367   | 2165026 | 0.13393946  | experimental | CR-105  | WIN 55,212-2                            |             |  |  |  |  |
| 1989 M21 | X | 752    | 760    | 0.0791757   | 713    | 720    | 0.47146816  | 2532438 | 0.51363502  | 2220220 | 0.22542818  | experimental | FA003   | ARACHIDONIC ACID                        |             |  |  |  |  |
| 1989 M22 | X | 670    | 680    | -0.0273281  | 670    | 680    | 0.31777811  | 2477600 | 0.41315952  | 2441815 | 0.59274059  | experimental | GR-200  | WY-14643                                |             |  |  |  |  |
| 1989 M23 | E | 627    | 1160   | -0.08317765 | 899    | 1480   | 1.13626695  | 84577   | -3.97139467 | 80349   | -3.32158858 | empty        |         |                                         |             |  |  |  |  |
| 1989 M24 | P | 179644 | 180840 | 232.428899  | 195962 | 197080 | 698.327921  | 2219123 | -0.06042824 | 2328050 | 0.40411655  | empty        |         |                                         |             |  |  |  |  |
| 1989 N01 | N | 636    | 640    | -0.07148821 | 475    | 480    | -0.37918837 | 2108058 | -0.26392924 | 1841150 | -0.40291234 | empty        |         |                                         |             |  |  |  |  |
| 1989 N02 | E | 77     | 80     | -0.79753738 | 117    | 117    | -1.65874732 | 75288   | 7.9884142   | 79352   | -3.32274291 | empty        |         |                                         |             |  |  |  |  |
| 1989 N03 | X | 155    | 160    | -0.69623889 | 157    | 160    | -0.5177986  | 1029324 | -2.24040564 | 1019466 | -0.76491793 | experimental | PI-122  | Tosyl-Phe-CMK (TPCK)                    |             |  |  |  |  |
| 1989 N04 | X | 396    | 400    | -0.38320664 | 194    | 200    | -1.38353494 | 1112491 | -2.08802596 | 1093593 | -1.64205115 | experimental | BIOMOL  | E1192                                   | calyculin A |  |  |  |  |
| 1989 N05 | X | 550    | 560    | -0.18318731 | 388    | 400    | -0.69014264 | 2363493 | 0.20408994  | 2276846 | 0.31929055  | experimental | PI-113  | Thiorphan                               |             |  |  |  |  |
| 1989 N06 | X | 1634   | 1640   | 1.22474094  | 2953   | 2560   | 7.04797238  | 6072602 | 7.0000085   | 8864444 | 11.2387901  | experimental | GR301   | camptothecin                            |             |  |  |  |  |
| 1989 N07 | X | 391    | 400    | -0.38970077 | 468    | 480    | -0.40420768 | 1955550 | -0.54353302 | 2098491 | 0.02365209  | experimental | PI-112  | Z-prolyl-prolinol canthanidin           |             |  |  |  |  |
| 1989 N08 | X | 353    | 360    | -0.66512333 | 395    | 400    | -0.66512333 | 1445715 | -1.47748495 | 1309228 | -1.28461794 | experimental | PR-105  | NapSul-ile-Trp-CHO                      |             |  |  |  |  |
| 1989 N09 | X | 474    | 480    | -0.28189815 | 394    | 400    | -0.66869752 | 2062907 | -0.34665095 | 1685030 | -0.66169441 | experimental | PI-125  | 7-epi-8-epi-arachidonic acid            |             |  |  |  |  |
| 1989 N10 | X | 474    | 480    | -0.28189815 | 394    | 400    | -0.66512333 | 1445715 | -1.47748495 | 1309228 | -1.28461794 | experimental | PI-110  | 3,4-dichloroisocoumarin                 |             |  |  |  |  |
| 1989 N11 | X | 433    | 440    | -0.33515005 | 394    | 400    | -0.66869752 | 1752379 | -0.91560781 | 1418803 | -1.10298813 | experimental | NK101   | capsazepine                             |             |  |  |  |  |
| 1989 N12 | X | 434    | 440    | -0.33385122 | 555    | 560    | -0.0932534  | 2101606 | -0.2754571  | 1838632 | -0.40780813 | experimental | PI-128  | Boc-GVV-CHO                             |             |  |  |  |  |
| 1989 N13 | X | 475    | 480    | -0.28059932 | 555    | 560    | -0.0932534  | 2131331 | -0.22128285 | 2031253 | -0.08780057 | experimental | S-107   | castanospermine                         |             |  |  |  |  |
| 1989 N14 | X | 273    | 280    | -0.54296233 | 513    | 520    | -0.24336926 | 2459379 | 0.37977457  | 2141910 | 0.09562274  | experimental | E1-212  | Bestatin                                |             |  |  |  |  |
| 1989 N15 | X | 474    | 480    | -0.28189815 | 313    | 520    | -0.23979507 | 1729394 | -0.95772147 | 1546439 | -0.89142069 | experimental | E1-127  | DIPYRIDAMOLE                            |             |  |  |  |  |
| 1989 N16 | X | 512    | 520    | -0.23254273 | 553    | 560    | -0.10040177 | 5417094 | 5.7989771   | 5115135 | 0.52399407  | experimental | PI-123  | 18- $\alpha$ -Ala-Phe-CMK               |             |  |  |  |  |
| 1989 N17 | X | 692    | 660    | -0.28636569 | 672    | 672    | 0.32492646  | 1594441 | -1.2049056  | 1141446 | 0.97807405  | experimental | CM-119  | CGP-37157                               |             |  |  |  |  |
| 1989 N18 | X | 434    | 440    | -0.33385122 | 353    | 360    | -0.8111665  | 2709572 | 0.83818419  | 2135648 | 0.085242957 | experimental | PI-130  | MDL-28170                               |             |  |  |  |  |
| 1989 N19 | X | 832    | 840    | 0.18308185  | 433    | 440    | -0.52930422 | 2398848 | 0.26886822  | 2257702 | 0.28755775  | experimental | E1225   | chelerythrine                           |             |  |  |  |  |
| 1989 N20 | X | 952    | 960    | 0.33894106  | 794    | 800    | 0.76097731  | 2103607 | -0.27207943 | 2332020 | 0.41074611  | experimental | P-120   | AC-Leu-Leu-Nle-CHO                      |             |  |  |  |  |
| 1989 N21 | X | 670    | 680    | -0.0273281  | 591    | 600    | 0.03541733  | 1600992 | -1.1929827  | 1418489 | -1.10350861 | experimental | FR102   | CAPE                                    |             |  |  |  |  |
| 1989 N22 | P | 868    | 880    | 0.22983961  | 909    | 920    | 1.17200883  | 1532037 | -1.31932371 | 1433797 | -1.07813431 | empty        |         |                                         |             |  |  |  |  |
| 1989 N23 | E | 806    | 1400   | 0.14931235  | 812    | 1360   | 0.82531268  | 82714   | -3.9748081  | 78977   | -3.32386278 | empty        |         |                                         |             |  |  |  |  |
| 1989 N24 | P | 204088 | 201660 | 259.397738  | 184071 | 185200 | 655.827462  | 2104970 | -0.26606    | 216066  | -1.05278413 | empty        |         |                                         |             |  |  |  |  |
| 1989 N01 | N | 640    | 640    | -0.07408586 | 1116   | 1120   | 0.91186555  | 1765562 | -0.8914536  | 1815334 | -0.44205453 | empty        |         |                                         |             |  |  |  |  |
| 1989 O02 | E | 156    | 160    | -0.69492507 | 155    | 160    | -1.52292823 | 78492   | -3.98254375 | 79653   | -3.32274226 | empty        |         |                                         |             |  |  |  |  |
| 1989 O03 | X | 637    | 640    | -0.07018938 | 316    | 320    | -0.94748411 | 2133457 | -0.21738754 | 2041348 | -0.07106726 | experimental | L102    | arachidonoyl-PAF                        |             |  |  |  |  |
| 1989 O04 | X | 394    | 400    | -0.38580429 | 635    | 640    | 0.19268157  | 2015077 | -0.43428622 | 2215025 | 0.21681703  | experimental | AC-119  | tetrahydrocannabinol-7- <i>oic acid</i> |             |  |  |  |  |
| 1989 O05 | X | 475    | 480    | -0.28059932 | 514    | 520    | -0.23979507 | 1961264 | -0.53288369 | 1888438 | -0.32452849 | experimental | BML-104 | AMIDODARONE                             |             |  |  |  |  |
| 1989 O06 | X | 751    | 760    | 0.07787688  | 748    | 760    | 0.59656471  | 2111074 | -0.25839821 | 2119037 | 0.05770882  | experimental | SK-141  | C2 DIHYDROCERAMIDE                      |             |  |  |  |  |
| 1989 O07 | X | 513    | 520    | -0.2312439  | 554    | 560    | -0.09687259 | 2344121 | 0.16859609  | 2290244 | 0.34149886  | experimental | AC-126  | ACONITINE                               |             |  |  |  |  |
| 1989 O08 | X | 674    | 680    | -0.02213279 | 395    | 400    | -0.66512333 | 2264798 | 0.0235859   | 1938011 | -0.24235706 | experimental | SL101   | AM 92016                                |             |  |  |  |  |
| 1989 O09 | X | 554    | 560    | -0.177992   | 435    | 440    | -0.52215585 | 2256419 | 0.00790638  | 2043274 | -0.06787475 | experimental | AC-115  | C2 DIHYDROCERAMIDE                      |             |  |  |  |  |
| 1989 O10 | X | 352    | 360    | -0.44035502 | 394    | 400    | -0.66869752 | 1660961 | -1.08310606 | 1499096 | -0.96898571 | experimental | SL112   | AM 92016                                |             |  |  |  |  |
| 1989 O11 | X | 394    | 400    | -0.38580429 | 635    | 440    | -0.52215585 | 2062640 | -0.34714015 | 2197836 | 0.18832481  | experimental | AC-133  | C8-ceramide                             |             |  |  |  |  |
| 1989 O12 | X | 555    | 560    | -0.17669318 | 515    | 520    | -0.23622088 | 2163120 | -0.16303828 | 1853473 | -0.38248592 | experimental | SL113   | amantidine                              |             |  |  |  |  |
| 1989 O13 | X | 394    | 400    | -0.38580429 | 313    | 320    | -0.95820667 | 2410452 | 0.29012934  | 2039995 | -0.07330997 | experimental | AC-200  | C8 DIHYDROCERAMIDE                      |             |  |  |  |  |
| 1989 O14 | X | 794    | 800    | 0.13372643  | 714    | 720    | 0.47504235  | 2002519 | -0.45729529 | 1839317 | -0.40595069 | experimental | PG035   | Amiloride hydrochloride dihydrate       |             |  |  |  |  |
| 1989 O15 | X | 753    | 760    | 0.08047453  | 573    | 600    | 0.04256571  | 2353450 | 0.18568891  | 2196590 | 0.18685519  | experimental | AC-105  | CARBACLYLIN                             |             |  |  |  |  |
| 1989 O16 | X | 469    | 480    | -0.28839228 | 469    | 480    | -0.40063349 | 1406541 | -1.54926049 | 1442544 | -1.06363542 | experimental | AC-105  | AMIDODARONE                             |             |  |  |  |  |
| 1989 O17 | X | 954    | 960    | 0.34153871  | 1074   | 1080   | 1.76174969  | 2460700 | 0.38219494  | 2142778 | 0.09706153  | experimental | GR205   | ciglitazone                             |             |  |  |  |  |
| 1989 O18 | X | 193    | 200    | -0.64686848 | 272    | 280    | -1.10474834 | 1349173 | -1.65437152 | 1276363 | -1.33909445 | experimental | AC-100  | A-23187                                 |             |  |  |  |  |
| 1989 O19 | X | 674    | 680    | -0.02213279 | 635    | 640    | 0.19268157  | 2606414 | 0.64917563  | 2295591 | 0.35036197  | experimental | E1160   | clofibrate                              |             |  |  |  |  |
| 1989 O20 | X | 511    | 520    | -0.23384156 | 552    | 560    | -0.10397596 | 2       |             |         |             |              |         |                                         |             |  |  |  |  |

|          |   |        |        |             |        |        |             |         |             |         |             |              |        |        |                            |
|----------|---|--------|--------|-------------|--------|--------|-------------|---------|-------------|---------|-------------|--------------|--------|--------|----------------------------|
| 1989 P19 | X | 675    | 680    | -0.02083396 | 475    | 480    | -0.37918837 | 1427700 | -1.51049246 | 1298773 | -1.30194798 | experimental | BIOMOL | GR-336 | Tanshinone IIA             |
| 1989 P20 | X | 515    | 520    | -0.22864625 | 673    | 680    | 0.32850067  | 2387695 | 0.24843342  | 2104142 | 0.0330191   | experimental | BIOMOL | PR-100 | CYPROMETHIN                |
| 1989 P21 | X | 594    | 600    | -0.12603893 | 1233   | 1240   | 2.33004544  | 1676637 | -1.05438412 | 1358198 | -1.20344603 | experimental | BIOMOL | CA-421 | Nigericin                  |
| 1989 P22 | X | 869    | 880    | 0.23113844  | 987    | 1000   | 1.45079542  | 1858802 | -0.72061703 | 1722244 | -0.60000907 | experimental | BIOMOL | T-108  | cytochalasin B             |
| 1989 P23 | E | 1018   | 1920   | 0.42466363  | 1227   | 2240   | 2.30860032  | 75542   | -3.98794882 | 75648   | -3.327733   | empty        |        |        |                            |
| 1989 P24 | P | 308330 | 309080 | 399.569724  | 346679 | 347240 | 1237.01867  | 1813047 | -0.80445044 | 1669365 | -0.68766047 | empty        |        |        |                            |
| 1990 A01 | N | 678    | 680    | -0.14044377 | 678    | 680    | -0.13722651 | 1414587 | -1.21116784 | 1519167 | -1.06322631 | empty        |        |        |                            |
| 1990 A02 | E | 114    | 120    | -0.97914663 | 111    | 120    | -0.2490238  | 79643   | -3.79661208 | 76064   | -3.78513609 | empty        |        |        |                            |
| 1990 A03 | X | 1353   | 1360   | 0.86332296  | 2152   | 2160   | 0.15340702  | 1473749 | -1.09658622 | 1565069 | -0.97664822 | experimental | BIOMOL | T-109  | cytochalasin D             |
| 1990 A04 | E | 469    | 480    | -0.45123969 | 468    | 480    | -0.17863291 | 1562187 | -0.92530449 | 1575682 | -0.95663051 | empty        |        |        |                            |
| 1990 A05 | X | 1676   | 1680   | 1.34364393  | 1595   | 1600   | 0.04358146  | 1415641 | -1.20912651 | 1416804 | -1.25629836 | experimental | BIOMOL | ST-330 | D609                       |
| 1990 A06 | E | 511    | 520    | -0.38878309 | 512    | 520    | -0.16995278 | 1679467 | -0.6991632  | 1674256 | -0.47838944 | empty        |        |        |                            |
| 1990 A07 | X | 834    | 840    | 0.09153787  | 795    | 800    | -0.11415722 | 1276482 | -1.47864182 | 1247700 | -1.57525399 | experimental | BIOMOL | EI-274 | damnacanthal               |
| 1990 A08 | E | 554    | 560    | -0.32483943 | 675    | 680    | -0.13781803 | 1619228 | -0.8148307  | 1680501 | -0.75892607 | empty        |        |        |                            |
| 1990 A09 | X | 516    | 520    | -0.38134778 | 635    | 640    | -0.14570496 | 1217291 | -1.59327961 | 1065495 | -1.91892009 | experimental | BIOMOL | CN-223 | YC-1                       |
| 1990 A10 | E | 474    | 480    | -0.44380438 | 635    | 640    | -0.14570496 | 1805651 | -0.45377715 | 1622123 | -0.86903578 | empty        |        |        |                            |
| 1990 A11 | X | 416    | 840    | -0.53005397 | 510    | 520    | -0.17035163 | 1787332 | -0.48925635 | 1868238 | -0.40482579 | experimental | BIOMOL | A-230  | decoyinine                 |
| 1990 A12 | E | 143531 | 143560 | 214.997251  | 436    | 440    | -0.18494246 | 1709974 | -0.63907896 | 1764796 | -0.5999933  | experimental | BIOMOL | S-109  | deoxymannojirimycin(1)     |
| 1990 A13 | X | 296    | 720    | -0.70805138 | 436    | 440    | -0.18494246 | 2029928 | -0.0194101  | 1671534 | -0.77583919 | empty        |        |        |                            |
| 1990 A14 | E | 475    | 480    | -0.44231732 | 435    | 440    | -0.18513963 | 1908231 | -0.25510599 | 1800887 | -0.53336885 | empty        |        |        |                            |
| 1990 A15 | X | 316    | 320    | -0.67876015 | 756    | 760    | -0.12184698 | 1822835 | -0.42049614 | 2017667 | -0.12298018 | experimental | BIOMOL | S-110  | deoxynorjirimycin(1)       |
| 1990 A16 | E | 634    | 640    | -0.20587449 | 554    | 560    | -0.161676   | 1804949 | -0.45513674 | 1877804 | -0.38678287 | empty        |        |        |                            |
| 1990 A17 | X | 1110   | 1120   | 0.50196694  | 831    | 840    | -0.10705898 | 1850895 | -0.36615112 | 1876744 | -0.38878219 | experimental | BIOMOL | EI-126 | dexamethasone              |
| 1990 A18 | E | 713    | 720    | -0.08839661 | 614    | 620    | -0.16956294 | 1632083 | -0.78993386 | 1842026 | -0.45426558 | empty        |        |        |                            |
| 1990 A19 | X | 511    | 520    | -0.38878309 | 572    | 680    | -0.13840955 | 1899932 | -0.27117902 | 1874046 | -0.39387103 | experimental | BIOMOL | CN-125 | dibutyrylcyclic AMP        |
| 1990 A20 | E | 555    | 560    | -0.3235237  | 675    | 680    | -0.13781803 | 1753512 | -0.55475702 | 1822261 | -0.3863696  | empty        |        |        |                            |
| 1990 A21 | E | 755    | 760    | -0.02594001 | 554    | 560    | -0.161676   | 1803093 | -0.45873158 | 1885487 | -0.3329158  | experimental | BIOMOL | CN-215 | dibutyrylcyclic GMP        |
| 1990 A22 | E | 549    | 560    | -0.33227474 | 790    | 800    | -0.11514309 | 1731843 | -0.59672432 | 1724599 | -0.6757506  | empty        |        |        |                            |
| 1990 A23 | E | 1038   | 2080   | 0.39489849  | 1332   | 2120   | -0.00827513 | 80869   | -3.79423763 | 78034   | -3.78142037 | empty        |        |        |                            |
| 1990 A24 | P | 356303 | 357280 | 528.695915  | 269663 | 270200 | 52.8994493  | 1620575 | -0.8122219  | 1716587 | -0.69086244 | empty        |        |        |                            |
| 1990 B01 | N | 596    | 600    | -0.26238284 | 596    | 600    | -0.15339472 | 1792478 | -0.47928987 | 2058870 | -0.04526511 | empty        |        |        |                            |
| 1990 B02 | E | 153    | 160    | -0.92115122 | 191    | 200    | -0.23324993 | 84605   | -3.78700195 | 83159   | -3.77175385 | empty        |        |        |                            |
| 1990 B03 | X | 1672   | 1680   | 1.33769568  | 2300   | 2320   | 0.18258868  | 1732665 | -0.59513231 | 1855948 | -0.42800659 | experimental | BIOMOL | T101   | Nocodazole                 |
| 1990 B04 | X | 600    | 620    | -0.3710521  | 391    | 400    | -0.27130521 | 2127204 | -0.4483775  | 1968621 | -0.66862174 | empty        |        |        |                            |
| 1990 B05 | X | 470    | 480    | -0.44975263 | 814    | 880    | -0.11041093 | 1705141 | -0.64843924 | 1903224 | -0.33883692 | experimental | BIOMOL | ST315  | OBAA                       |
| 1990 B06 | E | 474    | 480    | -0.44380438 | 513    | 520    | -0.16976011 | 2177154 | 0.26572891  | 2626286 | 1.02496699  | empty        |        |        |                            |
| 1990 B07 | X | 832    | 840    | 0.08856375  | 633    | 640    | -0.14609931 | 1389577 | -1.2596058  | 1393670 | -1.29993257 | experimental | BIOMOL | EI181  | okadaic acid               |
| 1990 B08 | E | 554    | 560    | -0.32483943 | 433    | 440    | -0.18553398 | 2053711 | 0.02665147  | 2407668 | 0.61262049  | empty        |        |        |                            |
| 1990 B09 | X | 473    | 480    | -0.44529144 | 514    | 520    | -0.16956294 | 1418368 | -1.20384501 | 1436907 | -1.21838107 | experimental | BIOMOL | CM-111 | OLIGOMYCIN (A shown)       |
| 1990 B10 | E | 713    | 720    | -0.08839661 | 469    | 480    | -0.17843574 | 2375023 | 0.64895042  | 2197735 | 0.21665521  | empty        |        |        |                            |
| 1990 B11 | E | 640    | 640    | -0.21181537 | 2314   | 2320   | 0.05333333  | 1808439 | -0.4483775  | 1812382 | 0.38190152  | experimental | BIOMOL | CC-200 | olomoucine                 |
| 1990 B12 | E | 1173   | 1600   | 0.59565183  | 349    | 360    | -0.20299654 | 2271278 | 0.44802924  | 2714404 | 1.19117082  | empty        |        |        |                            |
| 1990 B13 | X | 551    | 560    | -0.32930062 | 555    | 560    | -0.16147883 | 1443215 | -1.15572275 | 1539000 | -1.02581829 | experimental | BIOMOL | CM109  | ouabain                    |
| 1990 B14 | E | 554    | 560    | -0.32483943 | 475    | 480    | -0.1772527  | 2046086 | 0.0118838   | 2273592 | 0.35973295  | empty        |        |        |                            |
| 1990 B15 | X | 393    | 400    | -0.56425639 | 393    | 400    | -0.19342091 | 1575915 | -0.89871687 | 1707714 | -0.70759825 | experimental | BIOMOL | L-133  | PCA4248                    |
| 1990 B16 | E | 590    | 600    | -0.27130521 | 389    | 400    | -0.19420961 | 2105701 | 0.12734277  | 2161825 | 0.14892354  | empty        |        |        |                            |
| 1990 B17 | X | 2031   | 2040   | 1.87155087  | 2194   | 2200   | 0.16168831  | 1643214 | -0.76837596 | 1770332 | -0.58949127 | experimental | BIOMOL | EI-360 | PD 98059                   |
| 1990 B18 | E | 665    | 680    | -0.15977557 | 425    | 440    | -0.18711137 | 2047589 | 0.01479472  | 1876322 | 0.27626067  | empty        |        |        |                            |
| 1990 B19 | E | 1713   | 1720   | -1.39860521 | 1538   | 1720   | 0.0324258   | 1603547 | -0.8500077  | 1704507 | -0.6345734  | experimental | BIOMOL | EI-306 | SU-4312                    |
| 1990 B20 | E | 550    | 560    | -0.33078768 | 589    | 600    | -0.15477493 | 1265961 | 0.24405094  | 2448269 | 0.6892001   | empty        |        |        |                            |
| 1990 B21 | X | 472    | 480    | -0.4467785  | 673    | 680    | -0.13821237 | 1942782 | -0.18818956 | 2018789 | -0.12086391 | experimental | BIOMOL | PI-120 | pepstatin                  |
| 1990 B22 | E | 948    | 960    | 0.26106292  | 830    | 840    | -0.10725616 | 2295719 | 0.49535891  | 2099748 | 0.03183696  | empty        |        |        |                            |
| 1990 B23 | E | 1216   | 2200   | 0.65959549  | 736    | 1280   | -0.12579045 | 87988   | -3.78044995 | 83911   | -3.77033546 | empty        |        |        |                            |
| 1990 B24 | P | 333557 | 335360 | 494.871207  | 181877 | 183240 | 35.5903888  | 1946110 | -0.18174408 | 1988334 | -0.17830663 | empty        |        |        |                            |
| 1990 C01 | N | 676    | 680    | -0.14341789 | 436    | 440    | -0.18494246 | 1674466 | -0.70784885 | 1681453 | -0.75713046 | empty        |        |        |                            |
| 1990 C02 | E | 115    | 120    | -0.97765957 | 147    | 160    | -0.24192556 | 82628   | -3.7908309  | 84327   | -3.76985082 | empty        |        |        |                            |
| 1990 C03 | X | 631    | 640    | -0.21033567 | 3753   | 3880   | 0.46908157  | 226165  | 0.36065065  | 2485607 | 0.7596252   | experimental | BIOMOL | GR-234 | GW-9662                    |
| 1990 C04 | E | 713    | 720    | -0.08839661 | 40688  | 40760  | 7.75167956  | 2332581 | 0.56675115  | 2235999 | 0.28882689  | empty        |        |        |                            |
| 1990 C05 | X | 715    | 720    | -0.08542248 | 20198  | 20320  | 3.71159745  | 2199630 | 0.30925916  | 2259395 | 0.33295257  | experimental | BIOMOL | D-100  | 6,7-ADTN                   |
| 1990 C06 | E | 313    | 320    | -0.68322133 | 216    | 280    | -0.2283206  | 1827253 | -0.41193961 | 2112729 | 0.05632109  | empty        |        |        |                            |
| 1990 C07 | X | 713    | 720    | -0.08839661 | 753    | 760    | -0.1224385  | 2010499 | -0.0570391  | 2226915 | 0.27169309  | experimental | BIOMOL | FR-110 | Hinokitiol                 |
| 1990 C08 | E | 273    | 280    | -0.74270381 | 633    | 640    | -0.14609931 | 2163288 | 0.23887402  | 2278140 | 0.36831116  | empty        |        |        |                            |
| 1990 C09 | X | 594    | 600    | -0.26535696 | 394    | 400    | -0.19322374 | 1698475 | -0.66134958 | 1407135 | -1.27453555 | experimental | BIOMOL | CN-240 | diphenylamineiodonium      |
| 1990 C10 | E | 873    | 880    | -0.14953329 | 394    | 400    | -0.19322374 | 2086811 | 0.09075768  | 2176390 | 0.17639533  | empty        |        |        |                            |
| 1990 C11 | X | 431    | 440    | -0.50774804 | 709    | 720    | -0.13111413 | 1901934 | -0.26730166 | 1694931 | -0.73170892 | experimental | BIOMOL | CA-420 | 2,5-diterbutylhydroquinone |
| 1990 C12 | E | 952    | 960    | 0.26701117  | 474    | 480    | -0.17744987 | 2333042 | 0.56764399  | 2116415 | 0.06327344  | empty        |        |        |                            |
| 1990 C13 | X | 352    | 360    | -0.62522592 | 475    | 480    | -0.1772527  | 1443026 | -1.15608879 | 1582372 | -0.94401216 | experimental | BIOMOL | GR-319 | doxorubicin                |
| 1990 C14 | E | 553    | 560    | -0.3263265  | 394    | 400    | -0.19322374 | 2117742 | 0.1506631   | 2223691 | 0.26561214  | empty        |        |        |                            |
| 1990 C15 | X | 994    | 1000   | 0.32946777  | 634    | 640    | -0.14590213 | 1912887 | -0.24608851 | 1937041 | -0.27505296 | experimental | BIOMOL | EI-231 | DRB                        |
| 1990 C16 | E | 512    | 520    | -0.38729603 | 514    | 520    | -0.16956294 | 2442638 | 0.77989753  | 3123286 | 0.27052556  | empty        |        |        |                            |
| 1990 C17 | X | 589    | 600    | -0.27279227 | 549    | 560    | -0.16265187 | 2401587 | 0.70039808  | 2419306 | 0.6345734   | experimental | BIOMOL | FR-107 | Hydrochloride              |
| 1990 C18 | E | 832    | 840    | 0.08856375  | 419    | 600    | -0.18829441 | 2275949 | 0.45706949  | 2408751 | 0.6146632   | empty        |        |        |                            |
| 1990 C19 | X | 668    | 680    | -0.15531439 | 61070  | 61080  | 11.7704669  | 1400406 | -1.2386328  | 1564375 | -0.97795721 | experimental | BIOMOL | CA-302 | E6 berbamine               |
| 1990 C20 | E | 792    | 800    | 0.02908128  | 418    | 600    | -0.18849158 | 2372602 | 0.64426157  | 2198747 | 0.218564    | empty        |        |        |                            |
| 1990 C21 | X | 551    | 560    | -0.32930062 | 553    | 560    | -0.16187318 | 1938273 | -0.19629234 | 2006815 | -0.14344868 | experimental | BIOMOL | PI-107 | E-64-d                     |
| 1990 C22 | E | 909    | 920    | 0.20306751  | 790    | 800    | -0.11514309 | 2414    |             |         |             |              |        |        |                            |

|          |   |        |        |             |        |        |              |            |             |         |             |              |        |        |                                   |
|----------|---|--------|--------|-------------|--------|--------|--------------|------------|-------------|---------|-------------|--------------|--------|--------|-----------------------------------|
| 1990 D13 | X | 556    | 560    | -0.32186531 | 435    | 440    | -0.18513963  | 2307897    | 0.51894457  | 2389759 | 0.57884142  | experimental | BIOMOL | GR334  | cyclopamine                       |
| 1990 D14 | E | 434    | 440    | -0.50328685 | 435    | 440    | -0.18513963  | 2560271    | 1.0077283   | 2607110 | 0.98879817  | empty        |        |        |                                   |
| 1990 D15 | X | 513    | 520    | -0.38580897 | 594    | 600    | -0.15378907  | 2318672    | 0.53981299  | 2125951 | 0.08125977  | experimental | BIOMOL | EI-275 | PP1                               |
| 1990 D16 | E | 594    | 600    | -0.26535996 | 594    | 600    | -0.15378907  | 2703968    | 1.2840958   | 2383509 | 1.61384966  | empty        |        |        |                                   |
| 1990 D17 | X | 469    | 480    | -0.45123969 | 511    | 514    | 520          | -0.1756618 | -0.60684301 | 1695314 | -0.37098852 | experimental | BIOMOL | AC-146 | prazocin                          |
| 1990 D18 | E | 912    | 920    | 0.2075287   | 594    | 600    | -0.15378907  | 2452858    | 0.79969686  | 2848903 | 1.44485621  | empty        |        |        |                                   |
| 1990 D19 | X | 630    | 640    | -0.21182274 | 298    | 480    | -0.21215238  | 2064415    | 0.04738237  | 2187439 | 0.19723541  | experimental | BIOMOL | AP401  | Propidium iodide                  |
| 1990 D20 | E | 871    | 880    | 0.14655916  | 633    | 640    | -0.14609931  | 2613354    | 1.11053646  | 3064649 | 1.85178569  | empty        |        |        |                                   |
| 1990 D21 | X | 791    | 800    | 0.02759422  | 473    | 480    | -0.17764704  | 1804856    | -0.45531686 | 1863372 | -0.4140038  | experimental | BIOMOL | AR107  | propranolol (S-)                  |
| 1990 D22 | E | 747    | 760    | -0.0378365  | 109    | 600    | -0.15457776  | 2475568    | 0.84368031  | 2687134 | 1.13973549  | empty        |        |        |                                   |
| 1990 D23 | E | 1118   | 1880   | 0.51386343  | 515    | 1560   | -0.07077908  | 87400      | -3.78158876 | 84068   | -3.77003934 | empty        |        |        |                                   |
| 1990 D24 | P | 258205 | 259600 | 382.818125  | 183747 | 184840 | -0.35959103  | 1961137    | -0.15264063 | 2418727 | 0.41459164  | empty        |        |        |                                   |
| 1990 E01 | N | 236    | 240    | -0.79772509 | 436    | 440    | -0.18494246  | 2060493    | 0.03978646  | 1869374 | -0.40268313 | empty        |        |        |                                   |
| 1990 E02 | E | 117    | 120    | -0.97468545 | 157    | 160    | -0.23995383  | 83468      | -3.78920403 | 84651   | -3.76893971 | empty        |        |        |                                   |
| 1990 E03 | X | 555    | 560    | -0.32335237 | 475    | 480    | -0.1772527   | 2752539    | 1.38010212  | 2776031 | 1.30740864  | experimental | BIOMOL | PD129  | EHNA                              |
| 1990 E04 | E | 554    | 560    | -0.32483943 | 634    | 640    | -0.14590213  | 2350111    | 0.60070227  | 2499603 | 0.78602376  | empty        |        |        |                                   |
| 1990 E05 | X | 514    | 520    | -0.38432191 | 393    | 400    | -0.19342091  | 2585927    | 1.05741739  | 2512284 | 0.80994204  | experimental | BIOMOL | S620   | Pregnenolone 16alpha carbonitrile |
| 1990 E06 | E | 513    | 520    | -0.38580897 | 794    | 800    | -0.1143544   | 2399643    | 0.69663305  | 2479703 | 0.74848936  | empty        |        |        |                                   |
| 1990 E07 | X | 865    | 880    | 0.13763679  | 739    | 760    | -0.12519893  | 2344574    | 0.58997852  | 2418727 | 0.63347944  | experimental | BIOMOL | BL-093 | Estradiol-17 beta                 |
| 1990 E08 | E | 552    | 560    | -0.32781356 | 1790   | 1800   | 0.08203027   | 2259088    | 0.42441406  | 2443063 | 0.6793808   | empty        |        |        |                                   |
| 1990 E09 | X | 951    | 960    | 0.26552411  | 899    | 920    | -0.09365119  | 2429372    | 0.7542105   | 2942721 | 1.6218111   | experimental | BIOMOL | GR307  | etoposide                         |
| 1990 E10 | E | 552    | 560    | -0.32781356 | 914    | 400    | -0.19381526  | 2627078    | 1.13711633  | 2598855 | 0.97322799  | empty        |        |        |                                   |
| 1990 E11 | X | 594    | 600    | -0.26535996 | 391    | 920    | -0.09069359  | 2827654    | 1.52558061  | 2442015 | 0.67740411  | experimental | BIOMOL | CM120  | FCCP                              |
| 1990 E12 | E | 475    | 480    | -0.44231732 | 353    | 360    | -0.20130785  | 2455634    | 0.80507326  | 2425832 | 0.64688054  | empty        |        |        |                                   |
| 1990 E13 | X | 234    | 240    | -0.80069922 | 435    | 440    | -0.18513963  | 2979793    | 1.82023485  | 2257951 | 0.33023167  | experimental | BIOMOL | CN100  | forskolin                         |
| 1990 E14 | E | 555    | 560    | -0.32335237 | 354    | 435    | -0.18513963  | 2523609    | 0.67672341  | 2159947 | 1.26551984  | empty        |        |        |                                   |
| 1990 E15 | X | 473    | 480    | -0.44523444 | 354    | 360    | -0.2011062   | 2737249    | 1.35048934  | 2340287 | 0.485977    | experimental | BIOMOL | EI-280 | geldanamycin                      |
| 1990 E16 | E | 590    | 600    | -0.27130521 | 472    | 480    | -0.17784422  | 2673368    | 1.22676819  | 2626754 | 1.02584971  | empty        |        |        |                                   |
| 1990 E17 | X | 1754   | 1760   | 1.45963475  | 1314   | 1320   | -0.01182425  | 2513566    | 0.91727269  | 2277522 | 0.36714552  | experimental | BIOMOL | EI-147 | genistein                         |
| 1990 E18 | E | 629    | 640    | -0.2133098  | 431    | 440    | -0.18592832  | 2521649    | 0.93292739  | 2539851 | 0.86193756  | empty        |        |        |                                   |
| 1990 E19 | X | 831    | 840    | 0.08707669  | 632    | 640    | -0.14629648  | 1192454    | -1.64138251 | 1156365 | -1.74752557 | experimental | BIOMOL | EI-283 | Ro 31-8220                        |
| 1990 E20 | E | 871    | 880    | 0.14655916  | 713    | 720    | -0.13032544  | 2402038    | 0.70127155  | 2861298 | 1.46823505  | empty        |        |        |                                   |
| 1990 E21 | X | 790    | 800    | 0.02610715  | 673    | 680    | -0.13821237  | 1921596    | -0.22922141 | 1949887 | -0.25082347 | experimental | BIOMOL | EI-300 | GM6001                            |
| 1990 E22 | E | 748    | 760    | -0.03634944 | 630    | 680    | -0.12809089  | 2345147    | 0.58997852  | 2418727 | 0.63347944  | empty        |        |        |                                   |
| 1990 E23 | E | 721    | 1360   | -0.07650011 | 799    | 1320   | -0.11336853  | 84834      | -3.78655844 | 84689   | -3.76886804 | empty        |        |        |                                   |
| 1990 E24 | P | 215246 | 216760 | 318.935347  | 175671 | 176640 | 34.366731    | 2270223    | 0.4459797   | 2429557 | 0.65390645  | empty        |        |        |                                   |
| 1990 F01 | N | 438    | 440    | -0.49733861 | 637    | 640    | -0.14531061  | 2086641    | 0.09042843  | 2174340 | 0.17252872  | empty        |        |        |                                   |
| 1990 F02 | E | 157    | 160    | -0.91520298 | 76     | 80     | -0.25592487  | 83601      | -3.78894645 | 83816   | -3.77051465 | empty        |        |        |                                   |
| 1990 F03 | X | 354    | 360    | -0.6222518  | 274    | 280    | -0.21688454  | 1086958    | -1.84570121 | 1079994 | -1.89157279 | experimental | BIOMOL | GR-312 | puromycin                         |
| 1990 F04 | E | 554    | 560    | -0.32483943 | 713    | 720    | -0.13032544  | 2464030    | 0.82133416  | 2369710 | 0.54102599  | empty        |        |        |                                   |
| 1990 F05 | X | 794    | 800    | -0.14787908 | 794    | 2341   | 14354        | 58420508   | 1.59070947  | 2625959 | 1.02435022  | experimental | BIOMOL | EI314  | SB-431542                         |
| 1990 F06 | E | 745    | 760    | -0.04081063 | 423    | 440    | -0.18750571  | 2410599    | 0.71620180  | 2469262 | 0.78279606  | empty        |        |        |                                   |
| 1990 F07 | X | 3350   | 3360   | 3.83298541  | 3711   | 3720   | 0.46080029   | 3994954    | 3.78634141  | 4005740 | 3.62682516  | experimental | BIOMOL | EI305  | SP-600125                         |
| 1990 F08 | E | 422    | 440    | -0.52113159 | 769    | 800    | -0.11928373  | 2641204    | 1.16447477  | 2689039 | 1.14332861  | empty        |        |        |                                   |
| 1990 F09 | X | 1433   | 1440   | 0.9822879   | 4432   | 4440   | 0.60296228   | 2190364    | 0.29131329  | 1883947 | -0.37519625 | experimental | BIOMOL | AC1142 | benzamil                          |
| 1990 F10 | E | 591    | 600    | -0.26981815 | 582    | 600    | -0.15615515  | 2687593    | 1.25431837  | 2724133 | 1.20952118  | empty        |        |        |                                   |
| 1990 F11 | X | 506    | 520    | -0.3962184  | 703    | 720    | -0.13269152  | 1884080    | -0.30188028 | 1730306 | -0.66489633 | experimental | BIOMOL | A-275  | rapamycin                         |
| 1990 F12 | E | 594    | 600    | -0.20587449 | 714    | 720    | -0.13012826  | 2865929    | 1.59070947  | 27800   | 1.72864295  | empty        |        |        |                                   |
| 1990 F13 | X | 314    | 320    | -0.68173427 | 431    | 440    | -0.18533089  | 2119981    | 1.15499947  | 2131534 | 0.99179015  | experimental | BIOMOL | AM-100 | Cyclo [Arg-Gly-Asp-D-Phe-Val]     |
| 1990 F14 | E | 474    | 480    | -0.44380438 | 593    | 600    | -0.15398624  | 2574729    | 1.03572974  | 2540487 | 0.86313715  | empty        |        |        |                                   |
| 1990 F15 | X | 753    | 760    | -0.02891413 | 672    | 680    | -0.13840955  | 2445527    | 0.78549859  | 2604059 | 0.98304352  | experimental | BIOMOL | ST-300 |                                   |
| 1990 F16 | E | 554    | 560    | -0.32483943 | 473    | 480    | -0.17764704  | 2763773    | 1.4018595   | 2727267 | 1.30108249  | empty        |        |        |                                   |
| 1990 F17 | X | 351    | 360    | -0.62671298 | 632    | 640    | -0.14629648  | 2382500    | 0.66343146  | 2368111 | 0.53801003  | experimental | BIOMOL | PR-112 | RK-682                            |
| 1990 F18 | E | 392    | 400    | -0.56574345 | 513    | 520    | -0.16976011  | 2577464    | 1.04102673  | 2479991 | 0.74903257  | empty        |        |        |                                   |
| 1990 F19 | X | 873    | 880    | 0.14953329  | 953    | 960    | -0.08300383  | 1737858    | -0.5850748  | 1958534 | -0.23451393 | experimental | BIOMOL | CC205  | roscovitine                       |
| 1990 F20 | E | 630    | 640    | -0.21182274 | 471    | 480    | -0.17804139  | 2279192    | 0.46353035  | 2791426 | 1.33644593  | empty        |        |        |                                   |
| 1990 F21 | X | 907    | 920    | 0.20009339  | 550    | 560    | -0.1624647   | 1784959    | -0.49385224 | 1751365 | -0.62526589 | experimental | BIOMOL | EI270  | Rottlerin                         |
| 1990 F22 | E | 1109   | 1120   | 0.50047987  | 831    | 840    | -0.10705898  | 2312462    | 0.52778581  | 2728148 | 1.21709408  | empty        |        |        |                                   |
| 1990 F23 | E | 709    | 1480   | -0.09434485 | 798    | 1240   | -0.1135657   | 88744      | -3.77898577 | 82933   | -3.77218012 | empty        |        |        |                                   |
| 1990 F24 | P | 260434 | 261880 | 386.132786  | 147462 | 148600 | 28.8046677   | 2146169    | 0.20571891  | 2122982 | 0.07565979  | empty        |        |        |                                   |
| 1990 G01 | N | 357    | 360    | -0.61779061 | 556    | 560    | -0.16128166  | 2069488    | 0.05720747  | 2065735 | -0.03231668 | empty        |        |        |                                   |
| 1990 G02 | E | 116    | 120    | -0.97617251 | 195    | 200    | -0.23246124  | 83755      | -3.78864819 | 82524   | -3.77295155 | empty        |        |        |                                   |
| 1990 G03 | X | 755    | 760    | -0.02594001 | 835    | 840    | -0.10627029  | 2764788    | 1.40382529  | 2625959 | 1.02435022  | experimental | BIOMOL | EI-269 | Go6976                            |
| 1990 G04 | E | 513    | 520    | -0.38580897 | 633    | 640    | -0.14609931  | 2615880    | 1.11542868  | 2427744 | 0.31097973  | empty        |        |        |                                   |
| 1990 G05 | X | 554    | 560    | -0.32483943 | 431    | 440    | -0.18592832  | 2983874    | 1.8281387   | 2441145 | 0.67576316  | experimental | BIOMOL | EI287  | NIMESULIDE                        |
| 1990 G06 | E | 551    | 560    | -0.32930062 | 513    | 520    | -0.16976011  | 2113781    | 0.14299166  | 2635765 | 1.04284582  | empty        |        |        |                                   |
| 1990 G07 | X | 1223   | 1240   | 0.67000492  | 1182   | 1200   | -0.03785113  | 2699672    | 1.27771229  | 2465282 | 0.72128918  | experimental | BIOMOL | EI-148 | H7                                |
| 1990 G08 | E | 792    | 800    | 0.02908128  | 591    | 600    | -0.15438059  | 2475769    | 0.84406959  | 2428136 | 0.65122623  | empty        |        |        |                                   |
| 1990 G09 | X | 507    | 520    | -0.39473134 | 459    | 480    | -0.184040747 | 1740011    | -0.580905   | 1981437 | -0.19131542 | experimental | BIOMOL | EI-196 | H-89                              |
| 1990 G10 | E | 640    | 660    | -0.27725346 | 714    | 720    | -0.13012826  | 247441284  | 0.8455508   | 3781886 | 1.32279019  | empty        |        |        |                                   |
| 1990 G11 | X | 3112   | 3120   | 3.47966477  | 4352   | 4360   | 0.58718841   | 2200379    | 0.31070978  | 2568233 | 0.99179015  | experimental | BIOMOL | EI-195 | H9                                |
| 1990 G12 | E | 706    | 720    | -0.09880604 | 542    | 560    | -0.16404208  | 2592313    | 1.06978544  | 2427626 | 0.65026429  | empty        |        |        |                                   |
| 1990 G13 | X | 674    | 680    | -0.14639202 | 713    | 720    | -0.13032544  | 2801350    | 1.47463651  | 2704182 | 1.17189059  | experimental | BIOMOL | EI-233 | HA1077                            |
| 1990 G14 | E | 592    | 600    | -0.26833109 | 870    | 880    | -0.09936922  | 2707800    | 1.29345415  | 2480072 | 0.74918535  | empty        |        |        |                                   |
| 1990 G15 | X | 950    | 960    | 0.26403705  | 1349   | 1360   | -0.00492318  | 2899158    | 1.66406553  | 2628921 | 1.029937    | experimental | BIOMOL | EI-184 | HA-1004                           |
| 1990 G16 | E | 513    | 520    | -0.38580897 | 551    | 560    | -0.16226752  | 2431558    | 0.75844422  | 2619911 | 1.01294278  | empty        |        |        |                                   |
|          |   |        |        |             |        |        |              |            |             |         |             |              |        |        |                                   |





|          |   |        |        |             |        |        |             |          |             |            |             |              |        |         |  |                                 |
|----------|---|--------|--------|-------------|--------|--------|-------------|----------|-------------|------------|-------------|--------------|--------|---------|--|---------------------------------|
| 1990 L01 | N | 517    | 520    | -0.37986072 | 397    | 400    | -0.19263222 | 2013903  | -0.05044642 | 2020685    | -0.11728777 | empty        |        |         |  |                                 |
| 1990 L02 | E | 156    | 160    | -0.91669004 | 77     | 80     | -0.25572769 | 79717    | -3.79646876 | 82119      | -3.77371544 | empty        |        |         |  |                                 |
| 1990 L03 | X | 514    | 520    | -0.38432191 | 395    | 400    | -0.19302657 | 1890288  | -0.28985698 | 2362886    | 0.52815489  | experimental | BIOMOL | EI-267  |  | tyrphostin AG-825               |
| 1990 L04 | E | 640    | 640    | -0.20587449 | 473    | 480    | -0.17764704 | 2211180  | 0.33162854  | 2789558    | 1.34423965  | empty        |        |         |  |                                 |
| 1990 L05 | X | 554    | 560    | -0.32483943 | 794    | 800    | -0.16143544 | 2724004  | 0.25482938  | 2741750    | 1.24273064  | experimental | BIOMOL | NA136   |  | Kavain (+/-)                    |
| 1990 L06 | E | 502    | 520    | -0.40216665 | 698    | 720    | -0.13328304 | 2782010  | 1.43717989  | 2544541    | 0.8707836   | empty        |        |         |  |                                 |
| 1990 L07 | X | 4475   | 4480   | 0.50592996  | 5315   | 5320   | 0.77706636  | 1472743  | -1.09853458 | 1511758    | -1.0772008  | experimental | BIOMOL | AP-300  |  | TPEN                            |
| 1990 L08 | E | 694    | 720    | -0.11665078 | 570    | 600    | -0.15852123 | 2871563  | 1.61062109  | 2654260    | 1.07773018  | empty        |        |         |  |                                 |
| 1990 L09 | X | 3072   | 3080   | 3.41958222  | 3671   | 3680   | 0.45291336  | 1525830  | -0.99571867 | 1441667    | -1.20940299 | experimental | BIOMOL | GR-309  |  | trichostatin-A                  |
| 1990 L10 | E | 627    | 600    | -0.21628392 | 586    | 600    | -0.15536645 | 2716386  | 1.31008303  | 2304192    | 0.41744916  | empty        |        |         |  |                                 |
| 1990 L11 | X | 144    | 144    | 0.93453478  | 177    | 200    | -0.23601036 | 1030022  | -1.95597164 | 1014617    | -2.01488366 | experimental | BIOMOL | CA-310  |  | Trifluoperazine dihydrochloride |
| 1990 L12 | F | 515    | 520    | -0.38283485 | 555    | 560    | -0.16147883 | 2568814  | 1.02427239  | 3190282    | 2.08946552  | empty        |        |         |  |                                 |
| 1990 L13 | X | 395    | 400    | -0.56128226 | 555    | 560    | -0.16147883 | 1771259  | -0.52038563 | 1768006    | -0.59387845 | experimental | BIOMOL | CC-104  |  | tunicamycin                     |
| 1990 L14 | E | 474    | 480    | -0.44380438 | 554    | 560    | -0.161676   | 2736345  | 1.34873849  | 2715768    | 1.19374353  | empty        |        |         |  |                                 |
| 1990 L15 | X | 630    | 640    | -0.21182274 | 593    | 600    | -0.15398624 | 2337926  | 0.57710305  | 2834505    | 1.41769941  | experimental | BIOMOL | EI-229  |  | tyrphostin AG-370               |
| 1990 L16 | E | 713    | 720    | -0.08839661 | 552    | 560    | -0.16207035 | 2827262  | 1.52482141  | 2728754    | 1.21823709  | empty        |        |         |  |                                 |
| 1990 L17 | X | 473    | 480    | -0.44529144 | 472    | 480    | -0.17784422 | 2491579  | 0.87468951  | 2958303    | 1.6512011   | experimental | BIOMOL | EI-263  |  | tyrphostin AG-126               |
| 1990 L18 | E | 514    | 520    | -0.38432191 | 674    | 680    | -0.1380152  | 2981299  | 1.82315158  | 3103673    | 1.92539083  | empty        |        |         |  |                                 |
| 1990 L19 | X | 554    | 560    | -0.32483943 | 354    | 360    | -0.20111067 | 2634511  | 1.15151215  | 2637984    | 1.04703119  | experimental | BIOMOL | EI-190  |  | tyrphostin 1                    |
| 1990 L20 | E | 592    | 600    | -0.26833109 | 393    | 400    | -0.19342091 | 2872306  | 1.61206009  | 2794909    | 1.34301539  | empty        |        |         |  |                                 |
| 1990 L21 | X | 631    | 640    | -0.21033567 | 872    | 880    | -0.09897487 | 1814280  | -0.43706499 | 1895288    | -0.35380542 | experimental | BIOMOL | EI-215  |  | tyrphostin A9                   |
| 1990 L22 | E | 589    | 600    | -0.27279227 | 748    | 760    | -0.12342437 | 2888940  | 1.64427588  | 2906563    | 1.55361166  | empty        |        |         |  |                                 |
| 1990 L23 | E | 833    | 1720   | 0.09005081  | 969    | 1520   | -0.07984906 | 85564    | -3.78514462 | 82596      | -3.77281575 | empty        |        |         |  |                                 |
| 1990 L24 | P | 301489 | 302960 | 447.184109  | 185833 | 186880 | 36.37040666 | 2272221  | -0.04984931 | 2382588    | 0.56531583  | empty        |        |         |  |                                 |
| 1990 M01 | N | 477    | 480    | -0.43934319 | 477    | 480    | -0.17685835 | 2014592  | -0.0499112  | 2302032    | 0.41337508  | empty        |        |         |  |                                 |
| 1990 M02 | E | 117    | 120    | -0.97468545 | 117    | 120    | -0.24784076 | 79928    | -3.77443015 | 81800      | -3.77443015 | empty        |        |         |  |                                 |
| 1990 M03 | X | 435    | 440    | -0.50179979 | 475    | 480    | -0.1772527  | 2598114  | 1.08171191  | 2738134    | 1.23592918  | experimental | BIOMOL | CN242   |  | L-NAME                          |
| 1990 M04 | E | 554    | 560    | -0.32483943 | 555    | 560    | -0.16147883 | 2319404  | 0.54123068  | 2342721    | 0.49012066  | empty        |        |         |  |                                 |
| 1990 M05 | X | 274    | 280    | -0.74121674 | 312    | 320    | -0.20939195 | 2080149  | 0.0778551   | 1932320    | -0.28395748 | experimental | BIOMOL | ST420   |  | LY-294002                       |
| 1990 M06 | E | 475    | 480    | -0.44231732 | 475    | 480    | -0.1772527  | 2307342  | 0.51786968  | 2422144    | 0.63992441  | empty        |        |         |  |                                 |
| 1990 M07 | X | 143    | 160    | -0.93602184 | 220    | 240    | -0.2275319  | 984000   | -2.04510445 | 1004797    | -2.03340566 | experimental | BIOMOL | CN-200  |  | LY83583                         |
| 1990 M08 | E | 514    | 520    | -0.38432191 | 553    | 560    | -0.16187318 | 2352550  | 0.60542599  | 2785857    | 1.32594195  | empty        |        |         |  |                                 |
| 1990 M09 | X | 506    | 520    | -0.3962184  | 983    | 1000   | -0.07708863 | 1836829  | -0.39339335 | 2158072    | 0.14184482  | experimental | BIOMOL | EI-293  |  | 5-iodotubercidin                |
| 1990 M10 | E | 534    | 560    | -0.38432191 | 672    | 700    | -0.16187318 | 2455881  | 0.60542599  | 2785857    | 1.32594195  | empty        |        |         |  |                                 |
| 1990 M11 | X | 355    | 360    | -0.62076474 | 555    | 560    | -0.16147883 | 2071428  | 0.06096475  | 2178515    | -0.1804034  | experimental | BIOMOL | EI177   |  | Manoalide                       |
| 1990 M12 | E | 356    | 360    | -0.61927767 | 355    | 360    | -0.2009135  | 2212121  | 0.33170795  | 2053615    | -0.05517683 | empty        |        |         |  |                                 |
| 1990 M13 | X | 75     | 80     | -1.03714205 | 195    | 200    | -0.23246124 | 1118626  | -1.78436841 | 1113501    | -1.82837353 | experimental | BIOMOL | G-236   |  | manumycina                      |
| 1990 M14 | E | 474    | 480    | -0.44380438 | 474    | 480    | -0.17744987 | 2271965  | 0.4493535   | 2458283    | 0.70808801  | empty        |        |         |  |                                 |
| 1990 M15 | X | 434    | 440    | -0.50328685 | 633    | 640    | -0.14609931 | 2439154  | 0.77315573  | 2589994    | 0.95651481  | experimental | BIOMOL | G410    |  |                                 |
| 1990 M16 | E | 553    | 560    | -0.3262655  | 873    | 880    | -0.0987777  | 2386199  | 0.67059547  | 2482527    | 0.75815855  | empty        |        |         |  |                                 |
| 1990 M17 | X | 880    | 880    | 0.15102035  | 632    | 640    | -0.14629646 | 2573985  | 1.0342881   | 1.08657434 | 1.08657434  | experimental | BIOMOL | FR103   |  | MC1186                          |
| 1990 M18 | E | 713    | 720    | -0.08839661 | 635    | 640    | -0.14570496 | 2463001  | 0.81934125  | 2472956    | 0.7357635   | empty        |        |         |  |                                 |
| 1990 M19 | X | 352    | 360    | -0.62522592 | 194    | 200    | -0.23265841 | 1330349  | -1.37431525 | 1238593    | -1.59243117 | experimental | BIOMOL | PI129   |  | Glotoxin                        |
| 1990 M20 | E | 833    | 840    | 0.09005081  | 514    | 520    | -0.16956294 | 2668480  | 1.21730139  | 2523582    | 0.83125177  | empty        |        |         |  |                                 |
| 1990 M21 | X | 1031   | 1040   | 0.38448905  | 870    | 880    | -0.09936922 | 2477177  | 0.84679653  | 2577207    | 0.9323966   | experimental | BIOMOL | EI-295  |  | LFM-A13                         |
| 1990 M22 | E | 709    | 720    | -0.09434485 | 749    | 760    | -0.1232272  | 2446500  | 0.78738305  | 2594680    | 0.96535331  | empty        |        |         |  |                                 |
| 1990 M23 | E | 571    | 1400   | -0.29955938 | 918    | 1440   | -0.0899049  | 83378    | -3.78937834 | 81398      | -3.77507536 | empty        |        |         |  |                                 |
| 1990 M24 | P | 281180 | 282560 | 416.98337   | 175645 | 176680 | 34.26165045 | 2711885  | 1.30136574  | 2488361    | 0.76485738  | empty        |        |         |  |                                 |
| 1990 N01 | N | 397    | 400    | -0.55838814 | 557    | 560    | -0.16108446 | 1978114  | -1.11978054 | 2280828    | 0.37381114  | empty        |        |         |  |                                 |
| 1990 N02 | E | 117    | 120    | -0.97468545 | 76     | 80     | -0.2592487  | 78811    | -3.79822345 | 78164      | -3.78117517 | empty        |        |         |  |                                 |
| 1990 N03 | X | 434    | 440    | -0.50328685 | 515    | 520    | -0.16936576 | 2051306  | 0.0219936   | 1978054    | -0.19769626 | experimental | BIOMOL | ST-391  |  | U73122                          |
| 1990 N04 | E | 633    | 640    | -0.20736155 | 433    | 440    | -0.18553398 | 2701937  | 1.28209902  | 2192341    | 0.20648132  | empty        |        |         |  |                                 |
| 1990 N05 | X | 634    | 640    | -0.20587449 | 754    | 760    | -0.12224133 | 1817894  | -0.43006559 | 1911029    | -0.32411552 | experimental | BIOMOL | EI282   |  | U-0126                          |
| 1990 N06 | E | 594    | 600    | -0.26535696 | 513    | 520    | -0.16976011 | 2375588  | 0.65004469  | 2365178    | 0.53247795  | empty        |        |         |  |                                 |
| 1990 N07 | X | 555    | 560    | -0.32335237 | 515    | 520    | -0.16936576 | 1511000  | -1.02444058 | 1574487    | -0.95888446 | experimental | BIOMOL | KC-140  |  | valinomycin                     |
| 1990 N08 | E | 634    | 640    | -0.20587449 | 553    | 560    | -0.16187318 | 2345179  | 0.59115025  | 2427961    | 0.65089515  | empty        |        |         |  |                                 |
| 1990 N09 | X | 713    | 720    | -0.08839661 | 952    | 960    | -0.08320101 | 1571636  | -0.9070042  | 1689258    | -0.74240905 | experimental | BIOMOL | T116    |  | vinblastine                     |
| 1990 N10 | E | 513    | 520    | -0.38580897 | 594    | 600    | -0.15418341 | 2297420  | 0.49865331  | 2751425    | 1.26099801  | empty        |        |         |  |                                 |
| 1990 N11 | X | 675    | 680    | -0.14490495 | 554    | 360    | -0.20111067 | 1327796  | -1.37925975 | 1415565    | -1.2586353  | experimental | BIOMOL | CA-320  |  | W7                              |
| 1990 N12 | E | 434    | 440    | -0.50328685 | 316    | 520    | -0.16916859 | 2364442  | 0.62845774  | 2228735    | 0.27512589  | empty        |        |         |  |                                 |
| 1990 N13 | X | 395    | 400    | -0.56128226 | 275    | 280    | -0.21668737 | 2026142  | -0.02674262 | 2012651    | -0.13244111 | experimental | BIOMOL | ST-415  |  | wortmannin                      |
| 1990 N14 | E | 915    | 920    | 0.21198988  | 635    | 640    | -0.14570496 | 2414548  | 0.72550022  | 2229829    | 0.27718934  | empty        |        |         |  |                                 |
| 1990 N15 | X | 513    | 520    | -0.38580897 | 432    | 440    | -0.18571115 | 2407246  | 0.71135811  | 2167070    | 0.1588164   | experimental | BIOMOL | EI-299  |  | Y-27632                         |
| 1990 N16 | E | 433    | 440    | -0.50477391 | 712    | 720    | -0.13052261 | 2499674  | 0.89036745  | 2377467    | 0.55565866  | empty        |        |         |  |                                 |
| 1990 N17 | X | 393    | 400    | -0.56425639 | 594    | 600    | -0.15378907 | 2275672  | 0.45653301  | 2326416    | 0.45936698  | experimental | BIOMOL | AC-161  |  | YOHIMBINE HYDROCHLORIDE         |
| 1990 N18 | E | 673    | 680    | -0.14787908 | 353    | 360    | -0.20130785 | 2821259  | 1.51319514  | 2406922    | 0.61121343  | empty        |        |         |  |                                 |
| 1990 N19 | X | 674    | 680    | -0.14639202 | 635    | 640    | -0.14570496 | 1344337  | -1.34722408 | 1396521    | -1.29455516 | experimental | BIOMOL | ZW-9170 |  | Z-Leu3-VS                       |
| 1990 N20 | E | 550    | 560    | -0.33087868 | 671    | 680    | -0.13860672 | 2525647  | 0.94067049  | 2510949    | 0.80742403  | empty        |        |         |  |                                 |
| 1990 N21 | X | 1071   | 1080   | 0.44397153  | 1232   | 1240   | -0.02799247 | 2061025  | -0.02481681 | 1713413    | 0.170271    | experimental | BIOMOL | EI-298  |  | thrombin                        |
| 1990 N22 | E | 840    | 840    | 0.08410257  | 553    | 560    | -0.13114113 | 24239957 | 0.70553435  | 2540767    | 0.86362755  | empty        |        |         |  |                                 |
| 1990 N23 | E | 691    | 1200   | -0.12111197 | 900    | 1400   | -0.09345402 | 80033    | -3.79585675 | 78918      | -3.77953301 | empty        |        |         |  |                                 |
| 1990 N24 | P | 170620 | 172200 | 252.573816  | 168019 | 169200 | 32.8579604  | 2131415  | 0.17714419  | 2128519    | 0.08610341  | empty        |        |         |  |                                 |
| 1990 O01 | N | 516    | 520    | -0.38134778 | 557    | 560    | -0.16108448 | 1939374  | -0.19478998 | 1900296    | -0.34435957 | empty        |        |         |  |                                 |
| 1990 O02 | E | 115    | 120    | -0.97765957 | 156    | 160    | -0.240151   | 76667    | -3.80237583 | 78982      | -3.7796323  | empty        |        |         |  |                                 |
| 1990 O03 | X | 914    | 92     |             |        |        |             |          |             |            |             |              |        |         |  |                                 |

|          |   |         |         |             |        |        |             |         |             |          |             |              |        |              |                                                        |
|----------|---|---------|---------|-------------|--------|--------|-------------|---------|-------------|----------|-------------|--------------|--------|--------------|--------------------------------------------------------|
| 1990 O19 | X | 311     | 320     | -0.68619546 | 552    | 560    | -0.16207035 | 2021539 | -0.03565745 | 2466207  | 0.72303387  | experimental | BIOMOL | A-248        | monensin                                               |
| 1990 O20 | E | 714     | 720     | -0.08690954 | 633    | 640    | -0.14609931 | 2794708 | 1.46177266  | 2470509  | 0.73114809  | empty        |        |              |                                                        |
| 1990 O21 | X | 672     | 680     | -0.14936614 | 632    | 640    | -0.14629648 | 2198478 | 0.30702803  | 2150903  | 0.128323    | experimental | BIOMOL | A235         | TACROLIMUS                                             |
| 1990 O22 | E | 749     | 760     | -0.03486238 | 510    | 520    | -0.17035163 | 2240792 | 0.3889799   | 2422667  | 0.64091087  | empty        |        |              |                                                        |
| 1990 O23 | E | 749     | 1520    | -0.03486238 | 804    | 1480   | -0.11238266 | 82557   | -3.79098641 | 79750    | 0.72783374  | empty        |        |              |                                                        |
| 1990 O24 | P | 260268  | 262000  | 385.885934  | 228563 | 229760 | 44.7956242  | 2414692 | 0.72577911  | 2377365  | 0.55546447  | empty        |        |              |                                                        |
| 1990 P01 | N | 718     | 720     | -0.0809613  | 438    | 440    | -0.18454811 | 1746062 | -0.56918576 | 1725883  | -0.67332878 | empty        |        |              |                                                        |
| 1990 P02 | E | 75      | 80      | -1.03714205 | 156    | 160    | -0.240151   | 74870   | -3.80585615 | 75230    | -3.78670914 | empty        |        |              |                                                        |
| 1990 P03 | X | 756     | 760     | -0.02445295 | 874    | 880    | -0.09858053 | 1754006 | -0.55380027 | 1913257  | -0.31991317 | experimental | BIOMOL | P-416        | zVAD-FMK                                               |
| 1990 P04 | E | 474     | 480     | -0.44380438 | 1274   | 1280   | -0.01971118 | 2066366 | 0.05116096  | 2112851  | 0.0565512   | empty        |        |              |                                                        |
| 1990 P05 | X | 475     | 480     | -0.44231732 | 633    | 640    | -0.14609931 | 1714034 | -0.63121578 | 1825314  | -0.48578693 | experimental | BIOMOL | EI-261       | NS-398                                                 |
| 1990 P06 | E | 595     | 600     | -0.26389999 | 595    | 600    | -0.15359189 | 2278290 | 0.46160341  | 2284869  | 0.26342987  | empty        |        |              |                                                        |
| 1990 P07 | X | 716     | 720     | -0.08393542 | 435    | 440    | -0.18513963 | 1531206 | -0.98530674 | 1613593  | -0.88512464 | experimental | BIOMOL | EI-216       | AA-861                                                 |
| 1990 P08 | E | 467     | 480     | -0.45421381 | 507    | 520    | -0.17094315 | 2123628 | 0.16206277  | 2205495  | 0.23129174  | empty        |        |              |                                                        |
| 1990 P09 | X | 3194    | 3200    | 3.60100377  | 3475   | 3480   | 0.41426738  | 1939677 | -0.19420315 | 1885042  | -0.37313092 | experimental | BIOMOL | A-249        | Mycophenolic acid                                      |
| 1990 P10 | E | 548     | 560     | -0.33376181 | 547    | 560    | -0.16305622 | 2246627 | 0.40028029  | 2026153  | -0.1069743  | empty        |        |              |                                                        |
| 1990 P11 | X | 555     | 560     | -0.32335237 | 515    | 520    | -0.16936576 | 1643202 | -0.76839921 | 1574438  | -0.95897688 | experimental | BIOMOL | CT115        | Shikonin                                               |
| 1990 P12 | E | 556     | 560     | -0.32186531 | 596    | 600    | -0.15339472 | 2281606 | 0.46802565  | 2279321  | 0.37053871  | empty        |        |              |                                                        |
| 1990 P13 | X | 396     | 400     | -0.5597952  | 436    | 440    | -0.18494246 | 2025219 | -0.02853023 | 1828469  | -0.47983612 | experimental | BIOMOL | CA409        | Xestospogin C                                          |
| 1990 P14 | E | 435     | 440     | -0.50179979 | 474    | 480    | -0.17744987 | 2306429 | 0.51610144  | 1982837  | -0.18867481 | empty        |        |              |                                                        |
| 1990 P15 | X | 834     | 840     | 0.09153787  | 914    | 920    | -0.09069359 | 1842317 | -0.38276451 | 1967713  | -0.21720095 | experimental | BIOMOL | EI211        | CDC                                                    |
| 1990 P16 | E | 1033    | 1040    | 0.38746318  | 633    | 640    | -0.14609931 | 2202651 | 0.31511006  | 2177317  | 0.17814379  | empty        |        |              |                                                        |
| 1990 P17 | X | 514     | 520     | -0.38432191 | 675    | 680    | -0.13781803 | 1458075 | -1.12694274 | 1413506  | -1.26251889 | experimental | BIOMOL | G237         | Ceruleinin                                             |
| 1990 P18 | E | 594     | 600     | -0.26535696 | 594    | 600    | -0.15378907 | 2328387 | 0.55862845  | 2182253  | 0.187453383 | empty        |        |              |                                                        |
| 1990 P19 | X | 1036    | 1040    | 0.39192436  | 915    | 920    | -0.09496422 | 2038350 | -0.00309885 | 1964005  | -0.2241948  | experimental | BIOMOL | CA305        | Phenoxybenzamine hydrochloride                         |
| 1990 P20 | E | 594     | 600     | -0.26535696 | 594    | 600    | -0.15378907 | 2328387 | 0.55862845  | 2182253  | 0.187453383 | empty        |        |              |                                                        |
| 1990 P21 | X | 314     | 320     | -0.6813327  | 394    | 400    | -0.19323774 | 962417  | -2.08690519 | 2237423  | -1.59152166 | experimental | BIOMOL | T-126        | Wisikostatin                                           |
| 1990 P22 | E | 750     | 760     | -0.03337532 | 753    | 760    | -0.1224385  | 2147401 | 0.26097808  | 2241373  | 0.29896306  | empty        |        |              |                                                        |
| 1990 P23 | E | 1205    | 2440    | 0.64323781  | 930    | 1640   | -0.08753882 | 78561   | -3.79870763 | 78374    | -3.78077908 | empty        |        |              |                                                        |
| 1990 P24 | P | 423594  | 424360  | 628.761792  | 242250 | 242920 | 47.494336   | 1870342 | -0.32848727 | 1840535  | -0.45707783 | empty        |        |              |                                                        |
| 2051 A01 | N | 1358    | 1360    | 1.04708588  | 1678   | 1680   | 2.54835781  | 4045506 | 0.27368483  | 2618912  | -2.10139723 | empty        |        |              |                                                        |
| 2051 A02 | E | 33      | 40      | -2.30174898 | 32     | 40     | -2.60521619 | 50710   | -6.19255235 | 56397    | -7.18989487 | empty        |        |              |                                                        |
| 2051 A03 | X | 915     | 920     | -0.0725623  | 916    | 920    | 0.16255988  | 3801981 | -0.12050061 | 2696166  | -1.9479906  | experimental | NIH    | SAM001247063 | Nalbuphine                                             |
| 2051 A04 | X | 915     | 920     | -0.0725623  | 916    | 920    | 0.16255988  | 3801981 | -0.12050061 | 2696166  | -1.9479906  | experimental | NIH    | SAM001247064 | Cephalexin Monohydrate                                 |
| 2051 A05 | X | 913     | 920     | -0.07761715 | 954    | 960    | 0.28153668  | 4031087 | 0.2503453   | 3059048  | -1.32777383 | experimental | NIH    | SAM001246961 |                                                        |
| 2051 A06 | X | 752     | 760     | -0.48453217 | 673    | 680    | -0.59826544 | 4210562 | 0.54085523  | 3170704  | -1.00567982 | experimental | NIH    | SAM001246756 | Troxipide                                              |
| 2051 A07 | X | 833     | 840     | -0.27981095 | 594    | 600    | -0.84561195 | 2722602 | -1.86765381 | 3229441  | -0.8890432  | experimental | NIH    | SAM001247033 | Flotidone                                              |
| 2051 A08 | X | 634     | 640     | -0.78276803 | 713    | 720    | -0.47302671 | 3991620 | 0.18646144  | 3230525  | -0.88689066 | experimental | NIH    | SAM001246703 | Levosulpiride                                          |
| 2051 A09 | X | 634     | 640     | -0.78276803 | 713    | 720    | -0.47302671 | 3991620 | 0.18646144  | 3230525  | -0.88689066 | experimental | NIH    | SAM001246971 | Salbutamol Sulfate                                     |
| 2051 A10 | X | 748     | 760     | -0.49464186 | 947    | 960    | 0.2596199   | 3421043 | -0.73711168 | 3303310  | -0.74235833 | experimental | NIH    | SAM001246696 | Alprazolam                                             |
| 2051 A11 | X | 670     | 680     | -0.69178082 | 752    | 760    | -0.69178082 | 2657455 | -1.87019499 | 3992141  | -3.85428793 | experimental | NIH    | SAM001247054 | 10h-phenothiazine, 2-chloro-10-[3-(4-methyl-1-piperazi |
| 2051 A12 | X | 1073    | 1080    | 0.32677046  | 752    | 760    | -0.35091894 | 3453755 | -6.68416191 | 33262094 | -0.82420272 | experimental | NIH    | SAM001246689 | Doxetazone                                             |
| 2051 A13 | X | 831     | 840     | -0.28486579 | 1074   | 1080   | 0.65725289  | 3535926 | -0.55115457 | 3335498  | -0.6784412  | experimental | NIH    | SAM001247052 | Bifemelane                                             |
| 2051 A14 | X | 993     | 1000    | 0.12457666  | 912    | 920    | 0.15003601  | 3606196 | -0.43741097 | 3473594  | -0.40421796 | experimental | NIH    | SAM001246682 | Methyltestosterone                                     |
| 2051 A15 | X | 673     | 680     | -0.68419855 | 753    | 760    | -0.34778797 | 3726135 | -0.24326989 | 3469048  | -0.41324515 | experimental | NIH    | SAM001247007 |                                                        |
| 2051 A16 | X | 952     | 960     | 0.02095233  | 914    | 920    | 0.15629794  | 3407831 | -0.75849749 | 3221743  | -0.90432946 | experimental | NIH    | SAM001246614 | 4-chloro-n-(2-morpholin-4-yl-ethyl)-benzamide          |
| 2051 A17 | X | 950     | 960     | 0.01589749  | 591    | 600    | -0.85500485 | 3178088 | -1.13037448 | 2915853  | -1.51174855 | experimental | NIH    | SAM001247038 | Pizotyline                                             |
| 2051 A18 | X | 1511    | 1520    | 1.45378153  | 1232   | 1240   | -0.74542096 | 4004870 | 0.20790875  | 4592681  | 1.8299163   | experimental | NIH    | SAM001246685 | Flubenzazole                                           |
| 2051 A19 | X | 1628    | 1640    | 0.29489997  | 1230   | 1240   | -0.15468396 | 3591314 | -0.46149995 | 32501336 | -0.84794479 | experimental | NIH    | SAM001246693 | Ketocanzole                                            |
| 2051 A20 | X | 991     | 1000    | 0.11952181  | 1191   | 1200   | 0.102357619 | 3415445 | -0.74617297 | 3333407  | -0.68259339 | experimental | NIH    | SAM001246720 | Picidid                                                |
| 2051 A21 | X | 632     | 640     | -0.78782288 | 1191   | 1200   | 0.102357619 | 3154961 | -1.16780935 | 3245070  | -0.85800802 | experimental | NIH    | SAM001247006 | Prampixole                                             |
| 2051 A22 | X | 992     | 1000    | 0.12204923  | 1310   | 1320   | 1.39616143  | 3516433 | -0.58270721 | 3039738  | -1.26574471 | experimental | NIH    | SAM001246730 | Gabaxete Mesylate                                      |
| 2051 A23 | E | 701     | 1240    | -0.61343072 | 648    | 1160   | -0.67653965 | 49360   | -6.19473754 | 52524    | -7.19758565 | empty        |        |              |                                                        |
| 2051 A24 | P | 1837400 | 1842000 | 462.003463  | 174130 | 174440 | 542.490122  | 2594285 | -2.07535607 | 2599734  | -2.13947982 | empty        |        |              |                                                        |
| 2051 B01 | N | 674     | 680     | -0.68167113 | 593    | 600    | -0.84874292 | 3116505 | -1.23005674 | 3070171  | -1.20531258 | empty        |        |              |                                                        |
| 2051 B02 | E | 75      | 80      | -2.19559723 | 35     | 40     | -2.59832329 | 56989   | -6.18238875 | 57931    | -7.18684874 | empty        |        |              |                                                        |
| 2051 B03 | X | 792     | 800     | -0.38343527 | 832    | 840    | -0.10044147 | 3385827 | -0.79411459 | 3385429  | -0.57929104 | experimental | NIH    | SAM001246723 | Bupropion Hydrochloride                                |
| 2051 B04 | X | 711     | 720     | -0.5881565  | 712    | 720    | -0.47615768 | 3982732 | -0.17207474 | 3738752  | 0.12231783  | experimental | NIH    | SAM001246531 | Nitrendipine                                           |
| 2051 B05 | X | 631     | 640     | -0.7903503  | 631    | 640    | -0.72976612 | 4345100 | 0.75862721  | 3849478  | -0.05495744 | experimental | NIH    | SAM001246742 | Pazufloxacin                                           |
| 2051 B06 | X | 871     | 880     | -0.18376889 | 713    | 720    | -0.47302671 | 3842756 | -0.05449953 | 3856278  | 0.35569433  | experimental | NIH    | SAM001246528 | Rutin                                                  |
| 2051 B07 | X | 991     | 1000    | 0.11952181  | 512    | 520    | -1.10235136 | 7978999 | 0.64069298  | 7710296  | 0.80878572  | experimental | NIH    | SAM001246651 | Topotecan Hcl                                          |
| 2051 B08 | X | 631     | 640     | -0.7903503  | 873    | 880    | 0.02792824  | 3310174 | -0.91657147 | 3461494  | -0.42824545 | experimental | NIH    | SAM001246783 | Ritonavir                                              |
| 2051 B09 | X | 705     | 720     | -0.60332103 | 626    | 640    | -0.74542096 | 3180641 | -1.12624203 | 3014007  | -1.31683988 | experimental | NIH    | SAM001246658 | Naftopidil                                             |
| 2051 B10 | X | 2668    | 2680    | 4.3580094   | 2510   | 2520   | 5.15332352  | 4288278 | 0.66665141  | 3858886  | 0.36087315  | experimental | NIH    | SAM001246605 | Pterostilbene                                          |
| 2051 B11 | X | 1706    | 1720    | 1.92662892  | 1145   | 1160   | 0.87955165  | 3798056 | -0.12685387 | 3833329  | 0.3101235   | experimental | NIH    | SAM001246610 | Rosiglitazone Maleate                                  |
| 2051 B12 | X | 905     | 920     | -0.09783653 | 670    | 680    | -0.60765835 | 4684872 | 1.30860431  | 3645678  | -0.06250326 | experimental | NIH    | SAM001246558 | Ticlopidine Hcl                                        |
| 2051 B13 | X | 1070    | 1080    | 0.31918819  | 548    | 560    | -0.98963649 | 3822093 | -0.08794601 | 3731926  | 0.10876315  | experimental | NIH    | SAM001246612 | Bicalutamide                                           |
| 2051 B14 | X | 871     | 880     | -0.18376889 | 912    | 920    | 0.15003601  | 3164974 | 0.46706352  | 4322730  | 1.30180582  | experimental | NIH    | SAM001246992 | Phystogimmine                                          |
| 2051 B15 | X | 591     | 600     | -0.8914472  | 551    | 560    | -0.98024359 | 3967765 | 0.14784818  | 3720862  | 0.08679288  | experimental | NIH    | SAM001246561 | Flotafur                                               |
| 2051 B16 | X | 951     | 960     | 0.01842491  | 713    | 720    | -0.47302671 | 3842756 | -0.05449953 | 3856278  | 0.35569433  | experimental | NIH    | SAM001246615 | Ziziphatrin Benzoate                                   |
| 2051 B18 | X | 948     | 960     | 0.01084264  | 1032   | 1040   | 0.52578222  | 3862629 | -1.64099698 | 3651930  | -0.05014797 | experimental | NIH    | SAM001246670 | Isoquetartrin                                          |
| 2051 B17 | X | 666     | 680     | -0.70189051 | 748    | 760    | -0.36344281 | 3760442 | -0.18773834 | 3535379  | -0.28152879 | experimental | NIH    | SAM001246542 | Itopride Hcl                                           |
| 2051 B19 | X | 1629    | 1640    | 1.73201739  | 1029   | 1040   | 0.51635931  | 3022274 | -1.38258518 | 2810998  | -1.71996369 | experimental | NIH    | SAM001246768 | Doxorubicin Hydrochloride                              |

|          |   |        |        |             |        |            |             |            |             |            |              |              |              |               |                                                       |
|----------|---|--------|--------|-------------|--------|------------|-------------|------------|-------------|------------|--------------|--------------|--------------|---------------|-------------------------------------------------------|
| 2051 C13 | X | 826    | 840    | -0.29750291 | 1312   | 1.40242337 | 4072396     | 0.31721074 | 3846255     | 0.33579122 | experimental | NIH          | SAM001246973 |               |                                                       |
| 2051 C14 | X | 552    | 560    | -0.99001668 | 590    | 600        | -0.85813582 | 4058311    | 0.29441184  | 3845553    | 0.33439723   | experimental | NIH          | SAM001246686  | Tosufloxacin Tosylate                                 |
| 2051 C15 | X | 592    | 600    | -0.88891978 | 713    | 720        | -0.47302671 | 4698657    | 1.33091761  | 4315726    | 1.26804023   | experimental | NIH          | SAM001247014  | D-cycloserine                                         |
| 2051 C16 | X | 789    | 720    | -0.50321134 | 752    | 760        | -0.35091894 | 4001636    | 0.20267399  | 3646663    | -0.06564731  | experimental | NIH          | 7AM0062345616 | Haloperidol Mesylate Monohydrate                      |
| 2051 C17 | X | 1391   | 1400   | -1.30490883 | 671    | 680        | -0.60452738 | 3896807    | 0.094299094 | 4198464    | 0.03518799   | experimental | NIH          | SAM001246532  | Beta-estradiol                                        |
| 2051 C18 | X | 667    | 680    | -0.69936309 | 710    | 720        | -0.48241961 | 3680696    | -0.31682041 | 3373637    | -0.60270693  | experimental | NIH          | SAM001246677  | Tacrolimus                                            |
| 2051 C19 | X | 749    | 760    | -0.49211444 | 911    | 920        | 0.14690504  | 3795184    | -0.13150267 | 3525981    | -0.30019081  | experimental | NIH          | SAM001247047  | Triptenamine Hydrochloride                            |
| 2051 C20 | X | 791    | 800    | -0.3859627  | 631    | 640        | -0.72976612 | 3670539    | -0.33326119 | 3935980    | 0.51396206   | experimental | NIH          | SAM001246716  | 1-(2-methyl-5-nitro-imidazol-1-yl)propan-2-ol         |
| 2051 C21 | X | 832    | 840    | -0.28233837 | 991    | 1000       | 0.39738251  | 3609122    | -0.43267475 | 4320488    | 1.27749634   | experimental | NIH          | SAM001247018  | Lidocaine                                             |
| 2051 C22 | X | 389    | 400    | -1.40198655 | 988    | 1000       | 0.38798961  | 1726352    | -3.48024899 | 2449773    | -2.43766106  | experimental | NIH          | SAM001246724  | Oxiconazole Nitrate                                   |
| 2051 C23 | E | 665    | 1120   | -0.70441793 | 631    | 1000       | -0.72976612 | 54099      | -6.18705669 | 57399      | -7.18750801  | empty        |              |               |                                                       |
| 2051 E24 | P | 154252 | 155040 | 387.474827  | 123899 | 124520     | 385.190269  | 3181921    | -1.12417014 | 328392     | -1.05002743  | empty        |              |               |                                                       |
| 2051 D01 | N | 395    | 400    | -1.38682202 | 915    | 920        | 0.15942891  | 3093864    | -1.26670494 | 3039345    | -1.26652511  | empty        |              |               |                                                       |
| 2051 D02 | E | 77     | 80     | -2.19054238 | 35     | 40         | -2.59582329 | 56080      | -6.18386011 | 57463      | -7.18777807  | empty        |              |               |                                                       |
| 2051 D03 | X | 513    | 520    | -1.08858616 | 553    | 560        | -0.97398165 | 3895982    | 0.03165554  | 3954321    | 0.55038258   | experimental | NIH          | SAM001246718  | Irsogladine Maleate                                   |
| 2051 D04 | X | 711    | 720    | -0.58815665 | 554    | 560        | -0.97085068 | 2626767    | -2.02277858 | 2716422    | -1.90776737  | experimental | NIH          | SAM001246578  | Saquinavir Mesylate                                   |
| 2051 D05 | X | 550    | 560    | -0.99507153 | 571    | 680        | -0.60452738 | 3944425    | 0.11006854  | 3967154    | 0.57586563   | experimental | NIH          | SAM001246745  | Miglitol                                              |
| 2051 D06 | X | 632    | 640    | -0.78722898 | 1152   | 1160       | 0.90146842  | 4462060    | 0.94794629  | 4436002    | 1.50687752   | experimental | NIH          | SAM001246580  | Peniciliclovir                                        |
| 2051 D07 | X | 591    | 600    | -0.8914472  | 671    | 680        | -0.60452738 | 4233989    | 0.5787757   | 4214565    | 1.06716043   | experimental | NIH          | SAM001246539  | Levetiracetam                                         |
| 2051 D08 | X | 1031   | 1040   | 0.22061871  | 752    | 760        | -0.35091894 | 3101177    | -1.25486764 | 3420142    | -0.51035992  | experimental | NIH          | SAM001246780  | Vinorelbine Bitartrate                                |
| 2051 D09 | X | 990    | 1000   | 0.11699439  | 671    | 680        | -0.60452738 | 4337094    | 0.74566817  | 3876383    | 0.3956177    | experimental | NIH          | SAM001246662  | Nobletin                                              |
| 2051 D10 | X | 710    | 720    | -0.59068392 | 912    | 920        | 0.15003601  | 4879251    | 1.62323883  | 4686875    | 2.00504697   | experimental | NIH          | SAM001246547  | Roxatidine Acetate Hcl                                |
| 2051 D11 | X | 700    | 800    | -0.3859627  | 510    | 520        | -1.10861329 | 4152235    | 0.44644335  | 3847960    | 0.63917691   | experimental | NIH          | SAM001246668  | Escitalopram Oxalate                                  |
| 2051 D12 | X | 746    | 760    | -0.49969671 | 832    | 840        | -0.10044147 | 4811972    | 1.51433666  | 4619204    | 1.87066971   | experimental | NIH          | SAM001246594  | Loxoprofen Sodium                                     |
| 2051 D13 | X | 2151   | 2160   | 3.05133195  | 750    | 760        | -0.35718088 | 2993068    | -1.42985991 | 3235298    | -0.8774127   | experimental | NIH          | SAM001246672  | Benidipine Hcl                                        |
| 2051 D14 | X | 787    | 800    | -0.91556871 | 623    | 640        | -1.22447086 | 42117086   | 0.5514154   | 3282962    | -1.07411901  | experimental | NIH          | SAM001246577  | Haloperidol Hydrochloride                             |
| 2051 D15 | X | 712    | 720    | -0.58562908 | 593    | 600        | 0.84874292  | 3456677    | -0.69161882 | 3603202    | -0.14571783  | experimental | NIH          | SAM001246769  | Oligomycin C                                          |
| 2051 D16 | X | 671    | 680    | -0.6892534  | 512    | 520        | -1.10235136 | 3251407    | -1.01169557 | 3692523    | 0.03051889   | experimental | NIH          | SAM001246620  | Rifapentins                                           |
| 2051 D17 | X | 907    | 920    | -0.09278168 | 672    | 680        | -0.60139641 | 3949149    | 0.11771511  | 4167634    | 0.9739675    | experimental | NIH          | SAM001246763  | Flumazenil                                            |
| 2051 D18 | X | 1471   | 1480   | 1.33268463  | 992    | 1000       | 0.40051348  | 4315576    | 0.71083774  | 4118430    | 0.87626097   | experimental | NIH          | SAM001246597  | Rifaximin                                             |
| 2051 D19 | X | 749    | 760    | -0.49211444 | 750    | 760        | -0.35718088 | 3812105    | -0.10411324 | 3839696    | 0.32276673   | experimental | NIH          | SAM001246764  | Monoxidine Hcl                                        |
| 2051 D20 | X | 830    | 840    | -0.28739322 | 632    | 640        | -0.72663515 | 4193213    | 0.51277301  | 3899551    | 0.44162341   | experimental | NIH          | SAM001247080  | Altanserin                                            |
| 2051 D21 | X | 870    | 880    | -0.18629632 | 829    | 840        | -0.10983437 | 3767437    | -0.17641578 | 3272709    | -0.80312405  | experimental | NIH          | SAM001246582  | Lamivudine                                            |
| 2051 D22 | X | 1000   | 1000   | 0.12204927  | 712    | 720        | -0.80765795 | 3702107    | 0.38068184  | 3702107    | 0.38068184   | experimental | NIH          | SAM001246873  | Omidazole                                             |
| 2051 D23 | E | 383    | 720    | -1.41715109 | 630    | 960        | -0.73289709 | 56959      | -6.18243731 | 58976      | -7.18477364  | empty        |              |               |                                                       |
| 2051 D24 | P | 112461 | 113360 | 281.851312  | 110063 | 110760     | 341.898369  | 3118338    | -1.22708972 | 3171759    | -1.00358486  | empty        |              |               |                                                       |
| 2051 E01 | N | 997    | 1000   | 0.13468635  | 796    | 800        | -0.21315633 | 4334471    | 0.74142241  | 2941778    | -1.46026815  | empty        |              |               |                                                       |
| 2051 E02 | E | 74     | 80     | -2.19812465 | 76     | 80         | -2.46745358 | 56589      | -6.18303621 | 60369      | -7.1820075   | empty        |              |               |                                                       |
| 2051 E03 | X | 794    | 800    | -0.37838043 | 475    | 480        | -1.21819719 | 5332698    | 2.3572177   | 4187622    | 1.01365854   | experimental | NIH          | SAM001247069  | Zacopride                                             |
| 2051 E04 | X | 1068   | 1080   | 0.31413335  | 741    | 480        | -1.23072106 | 4531381    | 1.06015377  | 3889400    | 0.42146613   | experimental | NIH          | SAM001246575  | Ramipril                                              |
| 2051 E05 | X | 1320   | 1320   | 0.82829782  | 752    | 760        | -0.35718088 | 38347879   | 0.82891801  | 38347879   | 1.51493976   | experimental | NIH          | SAM001247051  | Haloperidol Succinate                                 |
| 2051 E06 | X | 789    | 800    | -0.39101754 | 479    | 760        | -0.36031184 | 3448684    | -0.69237016 | 3352501    | 0.61446776   | experimental | NIH          | SAM001246645  | Azelastine Hcl                                        |
| 2051 E07 | X | 711    | 720    | -0.58815665 | 631    | 640        | -0.72976612 | 5200872    | 2.14383554  | 4606211    | 1.84486895   | experimental | NIH          | SAM001247003  | Pancuronium                                           |
| 2051 E08 | X | 911    | 920    | -0.08267199 | 832    | 840        | -0.10044147 | 4761139    | 1.43205505  | 3848286    | 0.33982427   | experimental | NIH          | SAM001246649  | Leptrozol                                             |
| 2051 E09 | X | 590    | 600    | -0.89397462 | 751    | 760        | -0.35404991 | 5614239    | 2.81293831  | 4089765    | 0.81933963   | experimental | NIH          | SAM001246693  | Picrotin - Picrotoxinin                               |
| 2051 E10 | X | 792    | 800    | -0.38343527 | 831    | 840        | -0.10357243 | 4245971    | 0.59817055  | 4117794    | 0.87499804   | experimental | NIH          | SAM001246702  | Crotamiton                                            |
| 2051 E11 | X | 703    | 1040   | 0.22061871  | 873    | 880        | 0.02792824  | 4448974    | 0.92676443  | 4017660    | 0.67615759   | experimental | NIH          | SAM001247056  | Clofibrate                                            |
| 2051 E12 | X | 1031   | 1040   | 0.49969671  | 627    | 640        | -0.74228999 | 4111608    | 0.38068184  | 4028182    | -1.18741904  | experimental | NIH          | SAM001246591  | Tolterodine Tartrate                                  |
| 2051 E13 | X | 821    | 840    | -0.31014002 | 788    | 800        | -0.23820408 | 4521840    | 1.04471009  | 4519303    | 0.95280146   | experimental | NIH          | SAM001246679  | Zincarnon                                             |
| 2051 E14 | X | 911    | 920    | -0.08267199 | 552    | 560        | -0.97711262 | 4225620    | 0.56522909  | 3906151    | 0.454272932  | experimental | NIH          | SAM001246687  | Mecillinam                                            |
| 2051 E15 | X | 950    | 960    | 0.01589749  | 752    | 760        | -0.35091894 | 4080837    | 0.33087389  | 4102573    | 0.84477304   | experimental | NIH          | SAM001246977  | Fluvoxamine                                           |
| 2051 E16 | X | 911    | 920    | -0.08267199 | 792    | 800        | -0.2258602  | 3645885    | -0.37316777 | 3674566    | -0.0051391   | experimental | NIH          | SAM001246681  | Triclabendazole                                       |
| 2051 E17 | X | 700    | 760    | -0.4870596  | 631    | 640        | -0.72976612 | 5463813    | 2.56944898  | 3937257    | 0.51649786   | experimental | NIH          | SAM001247019  | N,n'-diacetyl-1,6-diaminohexane                       |
| 2051 E18 | X | 746    | 760    | -0.49969671 | 746    | 760        | -0.36970475 | 3905080    | 0.04638215  | 4046863    | 0.73414726   | experimental | NIH          | SAM001246749  | Valaciclovir Hydrochloride                            |
| 2051 E19 | X | 831    | 840    | -0.28486579 | 872    | 880        | 0.02479727  | 4621025    | 1.2052574   | 3563167    | -0.22634895  | experimental | NIH          | SAM001246996  | Pyrazinecarboxamide, 3,5-diamino-n-(aminoinimomethyl) |
| 2051 E20 | X | 950    | 960    | 0.01589749  | 670    | 680        | -0.60765835 | 4636033    | 1.22955032  | 3565404    | -0.22190684  | experimental | NIH          | SAM001246717  | Nifedipine Hcl                                        |
| 2051 E21 | X | 709    | 720    | -0.59321134 | 1149   | 1160       | 0.89207552  | 4396539    | 0.84188972  | 3713248    | 0.07167343   | experimental | NIH          | SAM001246982  | Indomethacin                                          |
| 2051 E22 | X | 749    | 760    | -0.49211444 | 1028   | 1040       | 0.51322834  | 3566839    | -0.50111677 | 3490362    | -0.37092101  | experimental | NIH          | SAM001246731  | Kitasamylin                                           |
| 2051 E23 | E | 625    | 1080   | -0.80551484 | 697    | 1040       | -0.5231222  | 56544      | -6.18310905 | 57134      | -7.18884318  | empty        |              |               |                                                       |
| 2051 E24 | P | 153856 | 154600 | 386.473968  | 114440 | 115200     | 355.602617  | 3918821    | 0.06862423  | 3621984    | -0.10955347  | empty        |              |               |                                                       |
| 2051 F01 | N | 715    | 720    | -0.57804681 | 515    | 520        | -1.09295845 | 3709562    | -0.27009602 | 3382963    | -0.58418788  | empty        |              |               |                                                       |
| 2051 F02 | E | 36     | 40     | -2.59269232 | 36     | 40         | -2.59269232 | 54378      | -6.18661508 | 57879      | -7.1869952   | empty        |              |               |                                                       |
| 2051 F03 | X | 511    | 520    | -1.093641   | 752    | 760        | -0.35091894 | 3615000    | -0.42316024 | 3821171    | 0.28598083   | experimental | NIH          | SAM001246733  | Acarbose                                              |
| 2051 F04 | X | 1231   | 1240   | 0.72610322  | 1393   | 1400       | 1.65603181  | 3749541    | -0.20538341 | 4086773    | 0.81339829   | experimental | NIH          | SAM001246775  | Bifonazole                                            |
| 2051 F05 | X | 507    | 520    | -1.1037507  | 349    | 360        | -1.61269921 | 4090339    | 0.34625445  | 3927032    | 0.49619363   | experimental | NIH          | SAM001246737  | Tranilast                                             |
| 2051 F06 | X | 1152   | 1160   | 0.52643684  | 1113   | 1120       | 0.77936066  | 4749144    | 1.41263916  | 4072948    | 2.03696382   | experimental | NIH          | SAM001246772  | Calcitriol                                            |
| 2051 F07 | X | 830    | 840    | -0.28739322 | 830    | 840        | -0.1067034  | 4082103    | 0.33292312  | 4489006    | 1.61212987   | experimental | NIH          | SAM001246540  | Pramipexole Hcl                                       |
| 2051 F08 | X | 791    | 800    | -0.3859627  | 931    | 640        | -0.72976612 | 4673998    | 1.29100295  | 4465833    | 1.56611424   | experimental | NIH          | SAM001246624  | Linzolide                                             |
| 2051 F09 | X | 672    | 680    | -0.68672598 | 631    | 600        | -0.85500485 | 4523668    | 1.04766901  | 4227215    | 1.09228008   | experimental | NIH          | SAM001246541  | Finasteride                                           |
| 2051 F10 | X | 551    | 560    | -0.99261641 | 642    | 640        | -0.72663515 | 4359119    | 0.78133927  | 4028182    | -1.18741904  | experimental | NIH          | SAM001246556  | Haloperidol Hydrochloride                             |
| 2051 F11 | X | 907    | 920    | -0.09278168 | 468    | 480        | -1.24913997 | 3923375    | 0.07392663  | 4156975    | 0.95280146   | experimental | NIH          | SAM001246679  | Zincarnon                                             |
| 2051 F12 | X | 2304   | 2320   | 3.438027    |        |            |             |            |             |            |              |              |              |               |                                                       |

|          |   |        |        |            |             |        |            |             |             |              |             |             |              |     |              |                                                       |
|----------|---|--------|--------|------------|-------------|--------|------------|-------------|-------------|--------------|-------------|-------------|--------------|-----|--------------|-------------------------------------------------------|
| 2051 G07 | X |        | 712    | 720        | -0.58562908 | 1072   | 1080       | 0.65099095  | 4792445     | 1.48272898   | 3995548     | 0.63224883  | experimental | NIH | SAM001247010 | Metronidazole                                         |
| 2051 G08 | X |        | 831    | 840        | -0.28486579 | 829    | 840        | -0.10983437 | 4304044     | 0.69217129   | 3932527     | 0.50710529  | experimental | NIH | SAM001246650 | Meropenem                                             |
| 2051 G09 | X |        | 671    | 680        | -0.6892534  | 992    | 1000       | 0.40051348  | 4203546     | 0.52949868   | 4483443     | 1.60108318  | experimental | NIH | SAM001247000 | Terazosin                                             |
| 2051 G10 | X |        | 640    | 640        | -0.7903533  | 711    | 720        | -0.47928864 | 4290486     | 0.67022543   | 3845493     | 1.33626383  | experimental | NIH | SAM001246659 | Amifibutamide Hcl                                     |
| 2051 G11 | X |        | 670    | 680        | -0.69178082 | 910    | 920        | 0.14377407  | 4217009     | 0.5539076    | 4270060     | 1.17329320  | experimental | NIH | SAM001246987 | Lorastidine                                           |
| 2051 G12 | X |        | 1105   | 1120       | 0.40764798  | 1347   | 1360       | 1.51200726  | 4102492     | 0.36592608   | 3291158     | -0.76529762 | experimental | NIH | SAM001246692 | Carprofen                                             |
| 2051 G13 | X |        | 744    | 760        | -0.50475155 | 826    | 840        | -0.11922728 | 4746874     | 1.40896479   | 3736454     | 0.11775459  | experimental | NIH | SAM001246975 | Cisapride                                             |
| 2051 G14 | X |        | 592    | 600        | -0.88891978 | 592    | 600        | -0.85187388 | 3460868     | -0.67264834  | 3536841     | -0.27862564 | experimental | NIH | SAM001246626 | Atomoxetine Hcl                                       |
| 2051 G15 | X |        | 832    | 840        | -0.28233837 | 631    | 640        | -0.72976612 | 3910440     | 0.0550582    | 4039759     | 0.72004054  | experimental | NIH | SAM001246976 | Doxepin                                               |
| 2051 G16 | X |        | 671    | 680        | -0.6892534  | 871    | 880        | 0.0216663   | 4057989     | 0.29389063   | 4173899     | 0.98640818  | experimental | NIH | SAM001246617 | Rofecoxib                                             |
| 2051 G17 | X |        | 711    | 720        | -0.5881565  | 510    | 520        | -1.10861329 | 4891550     | 1.64314679   | 3697650     | 0.04069998  | experimental | NIH | SAM001247024 | Diphenhydramine Hydrochloride                         |
| 2051 G18 | X |        | 908    | 920        | -0.09025426 | 1106   | 1120       | 0.75744388  | 3657248     | -0.35477487  | 4245258     | 0.91239753  | experimental | NIH | SAM001246748 | Clarithromycin                                        |
| 2051 G19 | X |        | 829    | 840        | -0.28992064 | 1111   | 1120       | 0.77309872  | 3769594     | -0.17292432  | 3534716     | -0.28284534 | experimental | NIH | SAM001247002 | 9-amino-1,2,3,4-tetrahydroacridine Hydrochloride      |
| 2051 G20 | X |        | 908    | 920        | -0.09025426 | 948    | 960        | 0.26275087  | 3661727     | -0.34752487  | 3530404     | -0.29140787 | experimental | NIH | SAM001246721 | Nategalid                                             |
| 2051 G21 | X |        | 1107   | 1120       | 0.41270283  | 1027   | 1040       | 0.51009737  | 4896289     | 1.65081765   | 4207619     | 1.05336745  | experimental | NIH | SAM001246988 |                                                       |
| 2051 G22 | X |        | 947    | 960        | 0.00831522  | 1067   | 1080       | 0.63533611  | 3640795     | -0.38140677  | 3724776     | 0.09456508  | experimental | NIH | SAM001246732 | Famciclovir                                           |
| 2051 G23 | E |        | 649    | 1120       | -0.7448567  | 792    | 1240       | -0.2256802  | 55081       | -6.18547716  | 57807       | -7.18709497 | empty        |     |              |                                                       |
| 2051 G24 | P | 158653 | 159480 | 398.598013 | 150494      | 151280 | 468.486552 | 3434745     | -0.71493273 | 3435827      | -0.47921353 | empty       |              |     |              |                                                       |
| 2051 H01 | N |        | 594    | 600        | -0.88386493 | 1035   | 1040       | 0.5314512   | 3566455     | -0.50173834  | 3253254     | -0.30143587 | empty        |     |              |                                                       |
| 2051 H02 | E |        | 116    | 120        | -2.09197291 | 114    | 120        | -2.34847678 | 53897       | -6.18739366  | 59519       | -7.18369538 | empty        |     |              |                                                       |
| 2051 H03 | X |        | 592    | 600        | -0.88891978 | 913    | 920        | 0.15316697  | 3114645     | -1.23306746  | 3116959     | -1.11240361 | experimental | NIH | SAM001246739 | Benpropine Phosphate                                  |
| 2051 H04 | X |        | 672    | 680        | -0.68672598 | 629    | 640        | -0.73602805 | 4817525     | 0.50356604   | 4953959     | 1.81982475  | experimental | NIH | SAM001246579 | Sumatriptan Succinate                                 |
| 2051 H05 | X |        | 551    | 560        | -0.9925441  | 1031   | 1040       | 0.52262125  | 4050736     | 0.28215045   | 3775347     | 0.19498612  | experimental | NIH | SAM001246652 | Olanzapine                                            |
| 2051 H06 | X |        | 792    | 800        | -0.38343527 | 1071   | 1080       | 0.64785998  | 4056261     | 0.29109357   | 4408652     | 1.45267444  | experimental | NIH | SAM001246532 | Difenphoxylate                                        |
| 2051 H07 | X |        | 470    | 480        | -1.19726533 | 588    | 600        | -0.86439776 | 4193040     | 0.51249298   | 3923517     | 0.48921374  | experimental | NIH | SAM001246595 | Risperidone                                           |
| 2051 H08 | X |        | 1080   | 1090       | -0.32175654 | 1151   | 1160       | 0.89337346  | 3458560     | 0.67638422   | 3458560     | 0.57992413  | experimental | NIH | SAM001246577 | Alprazolone Dihd                                      |
| 2051 H09 | X |        | 909    | 920        | -0.08772684 | 748    | 760        | -0.35444281 | 4385022     | 0.61747556   | 3705114     | 0.05552139  | experimental | NIH | SAM001246549 | Zolopidine Tartrate                                   |
| 2051 H10 | X |        | 1030   | 1040       | 0.21809129  | 672    | 680        | -0.60139641 | 4557464     | 1.10237342   | 3893201     | 0.42901394  | experimental | NIH | SAM001246604 | Analglidone Hcl                                       |
| 2051 H11 | X |        | 909    | 920        | -0.08772684 | 790    | 800        | -0.23194214 | 4700789     | 1.3343686    | 3491264     | -0.36912987 | experimental | NIH | SAM001246671 | Latanoprost                                           |
| 2051 H12 | X |        | 1269   | 1280       | 0.82214528  | 909    | 920        | 0.1406431   | 4820357     | 1.52790916   | 4757543     | 2.14537549  | experimental | NIH | SAM001246565 | Terbinafine Hcl                                       |
| 2051 H13 | X |        | 1070   | 1080       | 0.31918819  | 910    | 920        | 0.14377407  | 4006347     | 0.21029952   | 3867457     | 0.37789296  | experimental | NIH | SAM001246554 | Carvastatin Na                                        |
| 2051 H14 | X |        | 551    | 560        | -0.9925441  | 751    | 760        | -0.35404991 | 4652715     | 1.25655289   | 3953049     | 0.54785672  | experimental | NIH | SAM001247035 | Milnacipran                                           |
| 2051 H15 | X |        | 511    | 520        | -1.093641   | 952    | 960        | 0.27527474  | 4093881     | 0.35198776   | 4100007     | 0.83967762  | experimental | NIH | SAM001246765 | Oxymetolone                                           |
| 2051 H16 | X |        | 952    | 960        | -0.08511994 | 1104   | 1120       | -0.47649054 | 484369058   | 0.50114614   | 4224785     | 0.25939929  | experimental | NIH | SAM001246528 | 911                                                   |
| 2051 H17 | X |        | 951    | 960        | 0.01842491  | 952    | 960        | -0.35091894 | 3621424     | -0.41276194  | 3328493     | -0.69235133 | experimental | NIH | SAM001246776 | Hydrosilone                                           |
| 2051 H18 | X |        | 909    | 920        | -0.08772684 | 750    | 760        | -0.35718088 | 4253414     | 0.61021827   | 3863628     | 0.37028954  | experimental | NIH | SAM001246779 | 2',3'-dideoxycytidine                                 |
| 2051 H19 | X |        | 1028   | 1040       | 0.21303645  | 627    | 640        | -0.74228999 | 4406345     | 0.85776235   | 3600788     | -0.15164329 | experimental | NIH | SAM001246571 | Pefloxacin Mesylate                                   |
| 2051 H20 | X |        | 1308   | 1320       | 0.92071476  | 1469   | 1480       | 1.89388541  | 3758245     | -0.19129455  | 3951339     | 0.54485824  | experimental | NIH | SAM001246563 | Indrubicin                                            |
| 2051 H21 | X |        | 1107   | 1120       | 0.41270283  | 1106   | 1120       | 0.75744388  | 3975250     | 0.15996389   | 3623178     | -0.10718249 | experimental | NIH | SAM001246538 | Esomeprazole Mg                                       |
| 2051 H22 | X |        | 1188   | 1200       | 0.61742405  | 1148   | 1160       | 0.88894555  | 3600619     | -0.44643826  | 3543108     | -0.26618098 | experimental | NIH | SAM001246893 | Pirfenperone                                          |
| 2051 H23 | E |        | 1089   | 1100       | -0.71958247 | 954    | 960        | -0.71958247 | 55079       | -6.1854804   | 55079       | -7.18578247 | empty        |     |              |                                                       |
| 2051 H24 | P | 141267 | 142080 | 354.656245 | 118911      | 119640 | 369.601177 | 3510227     | -0.59275265 | 3358510      | -0.63274527 | empty       |              |     |              |                                                       |
| 2051 I01 | N |        | 1236   | 1240       | 0.73740333  | 835    | 840        | -0.09104856 | 4678422     | 1.29816392   | 3168420     | -1.01021526 | empty        |     |              |                                                       |
| 2051 I02 | E |        | 73     | 80         | -2.20065208 | 114    | 120        | -2.34847678 | 57808       | -6.18106306  | 60736       | -7.18127873 | empty        |     |              |                                                       |
| 2051 I03 | X |        | 953    | 960        | 0.02347976  | 912    | 920        | 0.15003601  | 5623617     | 2.82811815   | 4136862     | 0.9128622   | experimental | NIH | SAM001246964 | 3'-deoxydenosine                                      |
| 2051 I04 | X |        | 868    | 880        | -0.19135116 | 910    | 920        | 0.14377407  | 4511365     | 1.02775457   | 3708659     | 0.06256085  | experimental | NIH | SAM001246751 | 19-nortestosterone                                    |
| 2051 I05 | X |        | 1070   | 1080       | 0.31918819  | 786    | 800        | -0.24446601 | 3766984     | -0.17714903  | 3043779     | -1.25057165 | experimental | NIH | SAM001247059 | Duloxetine                                            |
| 2051 I06 | X |        | 798    | 800        | -0.01589749 | 850    | 860        | 0.12660361  | 4186300     | 0.50114614   | 3047924     | 0.57798243  | experimental | NIH | SAM001246760 | Benzetone                                             |
| 2051 I07 | X |        | 791    | 800        | -0.3859627  | 689    | 680        | -0.61078932 | 4192837     | 0.51216439   | 3425417     | -0.49988212 | experimental | NIH | SAM001246678 | Benzeneacetic Acid, Alpha-(hydroxymethyl)-, 9-methyl- |
| 2051 I08 | X |        | 830    | 840        | -0.28739322 | 750    | 760        | -0.35718088 | 4000523     | 0.20087242   | 3775578     | 0.19580226  | experimental | NIH | SAM001246637 | Orlista                                               |
| 2051 I09 | X |        | 910    | 920        | -0.08519941 | 1312   | 1320       | 1.40242337  | 4689845     | 1.31665393   | 3809340     | 0.2624875   | experimental | NIH | SAM001247027 | Diphenylcyclopropenone                                |
| 2051 I10 | X |        | 829    | 840        | -0.28992064 | 628    | 640        | -0.73915902 | 4066678     | 0.30795521   | 3667416     | -0.1933717  | experimental | NIH | SAM001246638 | Alfuzosin                                             |
| 2051 I11 | X |        | 871    | 880        | -0.18376889 | 952    | 960        | 0.27527474  | 4268548     | 0.63471515   | 3763806     | 0.17206865  | experimental | NIH | SAM001247037 | Phenelzine Sulfate Salt                               |
| 2051 I12 | X |        | 710    | 720        | -0.59068392 | 949    | 960        | -0.98650553 | 3768819     | -0.17417878  | 3326749     | -0.69635062 | experimental | NIH | SAM001246633 | Methyl Paroxetine                                     |
| 2051 I13 | X |        | 790    | 800        | -0.38849012 | 592    | 1000       | 0.40051348  | 3578532     | -0.48218972  | 3343574     | -0.66240433 | experimental | NIH | SAM001246981 | Indralatine                                           |
| 2051 I14 | X |        | 952    | 960        | 0.02095233  | 712    | 720        | -0.47615768 | 3541019     | -0.54291071  | 3224785     | -0.89828883 | experimental | NIH | SAM001246528 | Artesunate                                            |
| 2051 I15 | X |        | 622    | 640        | -0.8130971  | 545    | 560        | -0.9990294  | 3572987     | -0.49116522  | 3454835     | -0.44146852 | experimental | NIH | SAM001247046 | Trifluoperazine Dihydrochloride                       |
| 2051 I16 | X |        | 1151   | 1160       | 0.52390942  | 591    | 600        | -0.85500485 | 3987655     | 0.18004343   | 3767787     | 0.1799739   | experimental | NIH | SAM001246618 | Bisoprolol Fumarate                                   |
| 2051 I17 | X |        | 590    | 600        | -0.89397462 | 552    | 560        | -0.97711262 | 4239698     | 0.58801666   | 3417979     | -0.51465509 | experimental | NIH | SAM001246978 | Galanthamine                                          |
| 2051 I18 | X |        | 910    | 920        | -0.08519941 | 910    | 1000       | 0.39738251  | 3489957     | -0.62556299  | 3200456     | -0.94659998 | experimental | NIH | SAM001246750 | Aripiprazole                                          |
| 2051 I19 | X |        | 1149   | 1160       | 0.51885457  | 990    | 1000       | 0.39425154  | 3857292     | -0.03097062  | 4051067     | 0.74249533  | experimental | NIH | SAM001247008 | Ethinylestradiol                                      |
| 2051 I20 | X |        | 1188   | 1200       | 0.61742405  | 947    | 960        | 0.2596199   | 3831313     | -0.07302192  | 3674133     | -0.00599893 | experimental | NIH | SAM001246722 | Megestrol Acetate                                     |
| 2051 I21 | X |        | 788    | 800        | -0.39354496 | 1026   | 1040       | 0.51635931  | 3037315     | -1.35823883  | 2961336     | -1.42143098 | experimental | NIH | SAM001246673 | Paroxetine                                            |
| 2051 I22 | X |        | 867    | 880        | -0.19387858 | 827    | 840        | -0.11609631 | 3505113     | -0.6010305   | 3502519     | -0.34678033 | experimental | NIH | SAM001246725 | Sotalol Hydrochloride                                 |
| 2051 I23 | E |        | 524    | 880        | -1.06078451 | 664    | 960        | -0.62644416 | 56167       | -6.18371929  | 57085       | -7.18852868 | empty        |     |              |                                                       |
| 2051 I24 | P | 119429 | 120160 | 299.462392 | 98634       | 99400  | 306.114531 | 3646006     | -0.37297191 | 3445398      | -0.46020798 | empty       |              |     |              |                                                       |
| 2051 J01 | N |        | 713    | 720        | -0.58310165 | 555    | 560        | -0.96771972 | 3459521     | -0.67482868  | 3106262     | -1.13364511 | empty        |     |              |                                                       |
| 2051 J02 | E |        | 75     | 80         | -2.19559723 | 76     | 80         | -2.46745358 | 54273       | -6.186678504 | 57312       | -7.18807791 | empty        |     |              |                                                       |
| 2051 J03 | X |        | 831    | 840        | -0.28486579 | 712    | 720        | -0.47615768 | 3695490     | -0.29287388  | 3603291     | -0.14667298 | experimental | NIH | SAM001246740 | Phenprobamate                                         |
| 2051 J04 | X |        | 1349   | 1360       | 1.02433943  | 1026   | 1040       | 0.5060964   | 4042192     | 0.268320     |             |             |              |     |              |                                                       |

|          |   |        |        |             |        |        |             |         |             |         |              |              |     |              |
|----------|---|--------|--------|-------------|--------|--------|-------------|---------|-------------|---------|--------------|--------------|-----|--------------|
| 2051 K01 | N | 1156   | 1160   | 0.53654653  | 636    | 640    | -0.71411127 | 4426306 | 0.89007253  | 3440011 | -0.47090518  | empty        |     |              |
| 2051 K02 | E | 34     | 40     | -2.2992155  | 636    | 40     | -2.59269232 | 57040   | -6.1823062  | 58407   | -7.18590352  | empty        |     |              |
| 2051 K03 | X | 872    | 880    | -0.18124147 | 632    | 640    | -0.72663515 | 4560366 | 1.10707078  | 4948086 | 2.52374502   | experimental | NIH | SAM001246965 |
| 2051 K04 | X | 981    | 1000   | 0.09424759  | 1146   | 1160   | 0.08268261  | 4532357 | 1.06319038  | 4235727 | 1.10920259   | experimental | NIH | SAM001246752 |
| 2051 K05 | X | 1030   | 1040   | 0.21809129  | 706    | 720    | -0.49494349 | 4625311 | 1.213129499 | 4453116 | 1.25215488   | experimental | NIH | SAM001247060 |
| 2051 K06 | X | 870    | 880    | -0.18629632 | 831    | 840    | -0.10357243 | 4242351 | 0.59231098  | 3801971 | 0.24785455   | experimental | NIH | SAM001246642 |
| 2051 K07 | X | 550    | 560    | -0.99507153 | 790    | 800    | -0.23194214 | 3517808 | -0.58048155 | 3763467 | 0.17139548   | experimental | NIH | SAM001246968 |
| 2051 K08 | X | 991    | 1000   | 0.11952181  | 671    | 680    | -0.60452738 | 3790448 | -0.13916867 | 3493587 | -0.36451699  | experimental | NIH | SAM001246631 |
| 2051 K09 | X | 831    | 840    | -0.28486579 | 1032   | 1040   | 0.52575222  | 4633089 | 1.22478497  | 4246495 | 1.1314588    | experimental | NIH | SAM001247016 |
| 2051 K10 | X | 625    | 640    | -0.80551483 | 628    | 640    | -0.73915902 | 4243635 | 0.59938934  | 3925803 | 0.489375315  | experimental | NIH | SAM001246639 |
| 2051 K11 | X | 2712   | 2720   | 4.46921599  | 1470   | 1480   | 1.89711638  | 4617366 | 1.1953347   | 4434824 | 1.50453832   | experimental | NIH | SAM001246997 |
| 2051 K12 | X | 666    | 680    | -0.70189073 | 829    | 840    | -0.10983437 | 3425870 | -0.72929839 | 3325137 | -0.60377923  | experimental | NIH | SAM001246634 |
| 2051 K13 | X | 751    | 760    | -0.48705956 | 552    | 560    | -0.97711262 | 4328425 | 0.73163596  | 4031365 | 0.70337221   | experimental | NIH | SAM001247045 |
| 2051 K14 | X | 911    | 920    | -0.08267199 | 753    | 760    | -0.34778797 | 4017064 | 0.22764676  | 3726026 | 0.09704726   | experimental | NIH | SAM001246679 |
| 2051 K15 | X | 781    | 800    | -0.41123692 | 864    | 880    | -0.00025048 | 3917201 | 0.066002    | 3883735 | 0.41021689   | experimental | NIH | SAM001247023 |
| 2051 K16 | X | 710    | 720    | -0.59068392 | 1030   | 1040   | 0.51949028  | 3730725 | -0.23584021 | 3836738 | 0.3168929    | experimental | NIH | SAM001246623 |
| 2051 K17 | X | 911    | 920    | -0.08267199 | 672    | 680    | -0.60139641 | 4483820 | 0.98316844  | 3913707 | 0.463973359  | experimental | NIH | SAM001246980 |
| 2051 K18 | X | 988    | 1000   | 0.11193954  | 750    | 760    | -0.35718088 | 3657644 | -0.35413388 | 3782806 | 0.20979778   | experimental | NIH | SAM001246747 |
| 2051 K19 | X | 1469   | 1480   | 1.32762978  | 1309   | 1320   | 1.39303046  | 458140  | 1.10348764  | 4445553 | 1.52584336   | experimental | NIH | SAM001247012 |
| 2051 K20 | X | 909    | 920    | -0.08772684 | 1068   | 1080   | 0.63846708  | 3960769 | 0.136524    | 3651896 | -0.05015591  | experimental | NIH | SAM001246728 |
| 2051 K21 | X | 790    | 800    | -0.38849012 | 749    | 760    | -0.36031184 | 3987985 | 0.18057759  | 3575754 | -0.2013544   | experimental | NIH | SAM001247031 |
| 2051 K22 | X | 787    | 800    | -0.39607239 | 1229   | 1240   | 1.14255299  | 3892260 | 0.02563087  | 4100318 | 0.84029518   | experimental | NIH | SAM001246726 |
| 2051 K23 | E | 521    | 880    | -1.06836678 | 500    | 840    | -1.13992298 | 55238   | -6.18522303 | 58470   | -7.18577842  | empty        |     |              |
| 2051 K24 | P | 120782 | 121480 | 302.881995  | 113386 | 114160 | 352.302577  | 387165  | -0.00773792 | 3531929 | -0.28837651  | empty        |     |              |
| 2051 L01 | N | 712    | 720    | -0.58562908 | 835    | 840    | -0.09104896 | 3785536 | -0.14741092 | 3608030 | -0.13726254  | empty        |     |              |
| 2051 L02 | E | 115    | 115    | -0.09450323 | 75     | 120    | -2.0945045  | 52489   | -6.1886227  | 55216   | -7.19429403  | empty        |     |              |
| 2051 L03 | X | 784    | 800    | -0.40365453 | 670    | 680    | -0.60765835 | 3706001 | -0.27586009 | 3689011 | 0.02354496   | experimental | NIH | SAM001246743 |
| 2051 L04 | X | 3310   | 3320   | 5.98061467  | 2311   | 2320   | 4.53026081  | 2717504 | -1.87590576 | 2902972 | -1.53732692  | experimental | NIH | SAM001246708 |
| 2051 L05 | X | 501    | 520    | -1.11891523 | 707    | 720    | -0.49181252 | 4379967 | 0.8150652   | 3991181 | 0.62357709   | experimental | NIH | SAM001246654 |
| 2051 L06 | X | 872    | 880    | -0.18124147 | 911    | 920    | 0.14690504  | 3991820 | 0.18678517  | 4153418 | 0.94573817   | experimental | NIH | SAM001247013 |
| 2051 L07 | X | 711    | 720    | -0.5881565  | 671    | 680    | -0.60452738 | 3836013 | -0.06541419 | 4115750 | 0.87093918   | experimental | NIH | SAM001246552 |
| 2051 L08 | X | 793    | 800    | -0.38090785 | 872    | 880    | 0.02479727  | 3744129 | -0.21414362 | 3254550 | -0.83918317  | experimental | NIH | SAM001246548 |
| 2051 L09 | X | 431    | 440    | -1.29583481 | 591    | 600    | -0.85500485 | 3826153 | -0.08137423 | 3899692 | 0.4419034    | experimental | NIH | SAM001246601 |
| 2051 L10 | X | 390    | 400    | -0.38343327 | 600    | 610    | -0.85500485 | 4105503 | -0.2648424  | 3789242 | -1.0642081   | experimental | NIH | SAM001246594 |
| 2051 L11 | X | 865    | 880    | -0.19893343 | 909    | 920    | 0.1406431   | 3278724 | -0.96747849 | 3408611 | -0.53325753  | experimental | NIH | SAM001246666 |
| 2051 L12 | X | 830    | 840    | -0.28739322 | 910    | 920    | 0.14377407  | 4007325 | 0.21188258  | 4080991 | 0.81800124   | experimental | NIH | SAM001246581 |
| 2051 L13 | X | 831    | 840    | -0.28486579 | 752    | 760    | -0.35091894 | 3885698 | 0.01500919  | 3728905 | 0.10276421   | experimental | NIH | SAM001246562 |
| 2051 L14 | X | 749    | 760    | -0.49211444 | 692    | 600    | -0.85187388 | 4039957 | 0.26470286  | 4415138 | 1.46544697   | experimental | NIH | SAM001247022 |
| 2051 L15 | X | 1112   | 1120   | 0.42533994  | 572    | 680    | -0.60139641 | 3645438 | -0.37389131 | 3574857 | -0.20313561  | experimental | NIH | SAM001246720 |
| 2051 L16 | X | 790    | 800    | -0.38849012 | 751    | 760    | -0.35404991 | 4357832 | 0.77923605  | 3666193 | -0.02176574  | experimental | NIH | SAM001246755 |
| 2051 L17 | X | 951    | 960    | -0.11952181 | 813    | 820    | -0.25813851 | 3712953 | -0.26460389 | 3712953 | 0.13378256   | experimental | NIH | SAM001246633 |
| 2051 L18 | X | 708    | 720    | -0.59573877 | 870    | 880    | 0.01853533  | 4282963 | 0.65804821  | 3869834 | 0.38261307   | experimental | NIH | SAM001247077 |
| 2051 L19 | X | 949    | 960    | 0.01337007  | 1068   | 1080   | 0.63846708  | 4025255 | 0.24090524  | 3488806 | -0.37401083  | experimental | NIH | SAM001246591 |
| 2051 L20 | X | 749    | 760    | -0.49211444 | 868    | 880    | 0.0122734   | 4220079 | 0.55626007  | 3973910 | 0.58928131   | experimental | NIH | SAM001246871 |
| 2051 L21 | X | 790    | 800    | -0.38849012 | 710    | 720    | -0.48241961 | 3423242 | -0.73355224 | 3442013 | -0.466692972 | experimental | NIH | SAM001246567 |
| 2051 L22 | P | 1069   | 1080   | 0.31666077  | 948    | 960    | 0.26275087  | 4035658 | 0.25774422  | 3747613 | 0.1399135    | experimental | NIH | SAM001246867 |
| 2051 L23 | E | 493    | 880    | -1.13913661 | 798    | 1160   | -0.20689439 | 54774   | -6.18597409 | 58508   | -7.18570296  | empty        |     |              |
| 2051 L24 | P | 130084 | 130760 | 326.392079  | 121890 | 122520 | 378.926028  | 3395020 | -0.77923421 | 311133  | -1.0642081   | empty        |     |              |
| 2051 M01 | N | 1394   | 1400   | 1.3807309   | 875    | 880    | 0.03419018  | 4190330 | 0.5081064   | 3270337 | -0.8078423   | empty        |     |              |
| 2051 M02 | E | 72     | 80     | -2.2031795  | 75     | 80     | -2.47058455 | 53015   | -6.18882132 | 56326   | -7.19003586  | empty        |     |              |
| 2051 M03 | X | 1149   | 1160   | 0.51885457  | 555    | 560    | -0.96771972 | 4472319 | 0.96455217  | 3506044 | -0.33978058  | experimental | NIH | SAM001246962 |
| 2051 M04 | X | 1260   | 1280   | 0.79939847  | 628    | 640    | -0.73915902 | 3936672 | 0.09751902  | 3851861 | 0.3469233    | experimental | NIH | SAM001246753 |
| 2051 M05 | X | 1429   | 1440   | 1.22653288  | 631    | 640    | -0.72976612 | 4307180 | 0.62724742  | 3475999 | -0.39944224  | experimental | NIH | SAM001247057 |
| 2051 M06 | X | 708    | 720    | -0.59573877 | 831    | 840    | -0.10357243 | 3773073 | -0.16729298 | 3455638 | -0.43987397  | experimental | NIH | SAM001246643 |
| 2051 M07 | X | 871    | 880    | -0.18376889 | 551    | 560    | -0.98024359 | 3617312 | -0.41941789 | 3630952 | -0.09174532  | experimental | NIH | SAM001246969 |
| 2051 M08 | X | 390    | 400    | -1.39945913 | 712    | 720    | -0.47615768 | 3790728 | -0.13871545 | 3726101 | 0.09719519   | experimental | NIH | SAM001246694 |
| 2051 M09 | X | 673    | 680    | -0.68419855 | 672    | 680    | -0.60139641 | 3304393 | -0.92592898 | 3384425 | -0.58164216  | experimental | NIH | SAM001247051 |
| 2051 M10 | X | 832    | 840    | -0.28233837 | 952    | 960    | 0.27527474  | 3449251 | -0.69145237 | 3483785 | -0.38398125  | experimental | NIH | SAM001246632 |
| 2051 M11 | X | 749    | 760    | -0.49211444 | 709    | 720    | -0.48555058 | 3293099 | -0.94421018 | 2823400 | -1.6953365   | experimental | NIH | SAM001247004 |
| 2051 M12 | X | 951    | 960    | 0.01842491  | 871    | 880    | 0.0216663   | 4210290 | 0.54041495  | 3702792 | 0.05091049   | experimental | NIH | SAM001246635 |
| 2051 M13 | X | 828    | 840    | -0.29244806 | 790    | 800    | -0.23194214 | 4000537 | 0.20089508  | 3656193 | -0.04162317  | experimental | NIH | SAM001246995 |
| 2051 M14 | X | 752    | 760    | -0.48453217 | 632    | 640    | -0.72663515 | 4045809 | 0.27417529  | 3539711 | -0.27292655  | experimental | NIH | SAM001246674 |
| 2051 M15 | X | 551    | 560    | -0.9925441  | 631    | 640    | -0.72976612 | 3833565 | -0.06937669 | 3764524 | 0.17349441   | experimental | NIH | SAM001247049 |
| 2051 M16 | X | 632    | 640    | -0.78782288 | 671    | 680    | -0.60452738 | 4113264 | 0.3836235   | 3915008 | 0.47231705   | experimental | NIH | SAM001246625 |
| 2051 M17 | X | 629    | 640    | -0.79540515 | 1191   | 1200   | 1.02357619  | 3516931 | -0.58190112 | 3552023 | -0.24847808  | experimental | NIH | SAM001247028 |
| 2051 M18 | X | 1070   | 1080   | 0.31918819  | 988    | 1000   | 0.38798961  | 3675501 | -0.32522938 | 3799509 | 0.24296565   | experimental | NIH | SAM001246746 |
| 2051 M19 | X | 708    | 720    | -0.59573877 | 987    | 1000   | 0.38485864  | 3569804 | -0.49631743 | 3593537 | -0.16604192  | experimental | NIH | SAM001246985 |
| 2051 M20 | X | 1111   | 1120   | 0.42281252  | 1149   | 1160   | 0.89207552  | 3704190 | -0.28789149 | 3861334 | 0.365737425  | experimental | NIH | SAM001246738 |
| 2051 M21 | X | 828    | 840    | -0.29244806 | 989    | 1000   | 0.39112057  | 3718016 | -0.25641183 | 3754514 | 0.15361712   | experimental | NIH | SAM001247020 |
| 2051 M22 | X | 1269   | 1280   | 0.82214528  | 670    | 680    | -0.60139641 | 3518276 | -0.57972401 | 3718223 | 0.14628074   | experimental | NIH | SAM001246778 |
| 2051 M23 | X | 669    | 680    | -0.90026024 | 574    | 580    | -0.86126132 | 4058378 | -0.38791809 | 56330   | -7.19002791  | empty        |     |              |
| 2051 M24 | P | 110126 | 111040 | 275.94978   | 101615 | 102360 | 315.447948  | 3444220 | -0.69959588 | 3269162 | -0.81016748  | empty        |     |              |
| 2051 N01 | N | 1151   | 1160   | 0.52390942  | 834    | 840    | -0.09417953 | 3457337 | -0.67836385 | 2980274 | -1.38382497  | empty        |     |              |
| 2051 N02 | E | 71     | 80     | -2.20570692 | 76     | 80     | -2.46745358 | 50276   | -6.19325485 | 53938   | -7.19477781  | empty        |     |              |
| 2051 N03 | X | 1749   | 1760   | 2.03530809  | 474    | 480    | -1.22132816 | 2715737 | -1.87876594 | 3000167 | -1.34432257  | experimental | NIH | SAM001246736 |
| 2051 N04 | X | 1064   | 1080   | 0.30402366  | 592    |        |             |         |             |         |              |              |     |              |

|          |   |        |        |             |        |        |             |          |             |         |               |              |     |              |                                                         |
|----------|---|--------|--------|-------------|--------|--------|-------------|----------|-------------|---------|---------------|--------------|-----|--------------|---------------------------------------------------------|
| 2051 N19 | X | 988    | 1000   | 0.11193954  | 1189   | 1200   | 1.01731426  | 3605556  | -0.43844691 | 3653645 | -0.04668285   | experimental | NIH | SAM001246583 | Fluticasone Propionate                                  |
| 2051 N20 | X | 868    | 880    | -0.19135116 | 747    | 760    | -0.36657378 | 3772544  | -0.16814925 | 3551721 | -0.24907777   | experimental | NIH | SAM001246897 | Delta1-hydrocortisone 21-hemisuccinate Sodium Salt      |
| 2051 N21 | X | 989    | 1000   | 0.11446697  | 1030   | 1040   | 0.51949028  | 3187505  | -1.11513151 | 3338034 | -0.67340535   | experimental | NIH | SAM001246576 | Tropisetron Hcl                                         |
| 2051 N22 | X | 986    | 1000   | 0.1068847   | 708    | 720    | -0.48686155 | 3737185  | -0.22538364 | 3184155 | -0.95812115   | experimental | NIH | SAM001246588 | Benactyzine Hydrochloride                               |
| 2051 N23 | E | 738    | 1280   | -0.51991609 | 764    | 1160   | -0.31334732 | 54001    | 181272532   | 56255   | -7.19017486   | empty        |     |              |                                                         |
| 2051 N24 | P | 183220 | 184000 | 460.689203  | 133088 | 133800 | 413.988916  | 3471994  | -0.65463907 | 3360123 | -0.62954226   | empty        |     |              |                                                         |
| 2051 O01 | N | 1513   | 1520   | 1.43883637  | 1154   | 1160   | 0.90773036  | 3625966  | -0.40540996 | 3155811 | -1.0352535    | empty        |     |              |                                                         |
| 2051 O02 | E | 111    | 120    | -2.10461002 | 74     | 80     | -2.47371552 | 53754    | -6.18762513 | 56363   | -7.18996238   | empty        |     |              |                                                         |
| 2051 O03 | X | 1347   | 1360   | 1.01928423  | 754    | 760    | -0.344657   | 3961447  | 0.13762145  | 3314640 | -0.71985984   | experimental | NIH | SAM001246963 | Nifedipine                                              |
| 2051 O04 | X | 1344   | 1360   | 1.01170197  | 711    | 720    | -0.47928864 | 3538920  | -0.54630829 | 3332962 | -0.68347704   | experimental | NIH | SAM001246754 | Trileptal                                               |
| 2051 O05 | X | 1426   | 1440   | 1.21895061  | 711    | 720    | -0.47928864 | 3895711  | 0.03121688  | 3593229 | -0.16665353   | experimental | NIH | SAM001247039 | Progesterone                                            |
| 2051 O06 | X | 903    | 920    | -0.10289137 | 710    | 720    | -0.48241961 | 3366517  | -0.82537102 | 362345  | -0.10905505   | experimental | NIH | SAM001246700 | Idebenone                                               |
| 2051 O07 | X | 1310   | 1320   | 0.9257696   | 671    | 680    | -0.60452738 | 3453337  | -0.68483851 | 3457245 | -0.43668288   | experimental | NIH | SAM001246970 | Capsaicin                                               |
| 2051 O08 | X | 826    | 840    | -0.29750291 | 672    | 680    | -0.60139641 | 3487980  | -0.62876309 | 3225606 | -0.89665853   | experimental | NIH | SAM001246695 | Cetaxate Hcl                                            |
| 2051 O09 | X | 1190   | 1200   | 0.6224789   | 711    | 720    | -0.47928864 | 3672543  | -0.33001739 | 3737274 | 0.1193829     | experimental | NIH | SAM001247053 | 3(2h)-pyridazinone, 6-[4-(difluoromethoxy)-3-methoxy]   |
| 2051 O10 | X | 789    | 800    | -0.39101754 | 871    | 880    | 0.0216663   | 3222319  | -1.0587793  | 3217672 | -0.91241342   | experimental | NIH | SAM001246688 | Perospirone Hcl                                         |
| 2051 O11 | X | 946    | 960    | 0.0057878   | 988    | 1000   | 0.38798961  | 3517975  | -0.58021123 | 3383510 | -0.58310168   | experimental | NIH | SAM001247026 | Normeticine                                             |
| 2051 O12 | X | 750    | 760    | -0.48958702 | 671    | 680    | -0.60452738 | 3378983  | -0.80519274 | 3267376 | -0.81371402   | experimental | NIH | SAM001246636 | Terazosolone                                            |
| 2051 O13 | X | 786    | 800    | -0.39859981 | 508    | 520    | -1.11487523 | 3234010  | -1.03985549 | 3280493 | -0.93064056   | experimental | NIH | SAM001247001 | Urapidil Hydrochloride                                  |
| 2051 O14 | X | 752    | 760    | -0.48453217 | 1030   | 1040   | 0.51949028  | 3128295  | -1.21097268 | 3279442 | -0.78975404   | experimental | NIH | SAM001246680 | Bufomedil Hydrochloride                                 |
| 2051 O15 | X | 827    | 840    | -0.29497548 | 1625   | 1640   | 2.38241648  | 2998650  | -1.42082452 | 3077363 | -1.19103111   | experimental | NIH | SAM001246989 | Maprotiline Hcl                                         |
| 2051 O16 | X | 1547   | 1560   | 1.52476874  | 1748   | 1760   | 2.76752556  | 2584197  | -2.09168516 | 2665935 | -2.00802161   | experimental | NIH | SAM001246676 | Idarubicin Hcl                                          |
| 2051 O17 | X | 1665   | 1680   | 1.8230046   | 827    | 840    | -0.11609631 | 3216288  | -1.06854147 | 3483634 | -0.38428109   | experimental | NIH | SAM001246994 | Piribedil                                               |
| 2051 O18 | X | 1546   | 1560   | 1.52224136  | 989    | 1000   | 0.39112057  | 3117838  | -1.22789906 | 3117840 | -1.11065417   | experimental | NIH | SAM001246719 | Nisoldipine                                             |
| 2051 O19 | X | 1107   | 1120   | 0.41270283  | 908    | 920    | 0.13751213  | 3248933  | -1.01570015 | 3320902 | -0.70742511   | experimental | NIH | SAM001247043 | Trmp                                                    |
| 2051 O20 | X | 869    | 880    | -0.18882374 | 710    | 720    | -0.48241961 | 3299818  | -0.93335137 | 3481361 | -0.26242566   | experimental | NIH | SAM001246759 | Stavudine                                               |
| 2051 O21 | X | 908    | 920    | -0.09025426 | 868    | 880    | 0.0122734   | 3654468  | -0.35924563 | 327721  | -0.79418423   | experimental | NIH | SAM001246785 | Oxirane-carboxylic Acid, 2-[6-(4-chlorophenoxy)hexyl]-, |
| 2051 O22 | X | 1427   | 1440   | 1.22147804  | 948    | 960    | 0.26275087  | 3089739  | -1.27338193 | 3228894 | -0.88995069   | experimental | NIH | SAM001246872 | Alsetron Hcl                                            |
| 2051 O23 | E | 692    | 1160   | -0.63617753 | 897    | 1320   | 0.10307148  | 53146    | -6.18860928 | 56252   | -7.1901828    | empty        |     |              |                                                         |
| 2051 O24 | P | 155821 | 157240 | 391.440353  | 141562 | 142480 | 440.520743  | 3043037  | -1.34897683 | 3206432 | -0.93473318   | empty        |     |              |                                                         |
| 2051 P01 | N | 995    | 1000   | 0.1296315   | 1036   | 1040   | 0.53827609  | 2817278  | -1.71440506 | 3023131 | -1.29872195   | empty        |     |              |                                                         |
| 2051 P02 | E | 73     | 80     | -2.20065208 | 115    | 120    | -2.34534582 | 51639    | -6.19104861 | 57637   | -7.18743256   | empty        |     |              |                                                         |
| 2051 P03 | X | 1272   | 1280   | 0.82972754  | 755    | 760    | -0.34152603 | 3124655  | -1.21686462 | 3148724 | -1.05529795   | experimental | NIH | SAM001246741 | Lomifylline                                             |
| 2051 P04 | X | 1486   | 1520   | 1.32762978  | 874    | 880    | -0.48202523 | 3802826  | -0.59092699 | 3495169 | -0.91496172   | experimental | NIH | SAM001246577 | Quetiapine Hemifumarate                                 |
| 2051 P05 | X | 1146   | 1160   | 0.5112723   | 912    | 920    | -0.47615768 | 3064436  | -1.31433902 | 3050343 | -1.2446859    | experimental | NIH | SAM001246656 | Pravastatin Sodium                                      |
| 2051 P06 | X | 1952   | 1960   | 2.54837487  | 1193   | 1200   | 1.02983813  | 3540966  | -0.5429965  | 3807857 | 0.25954264    | experimental | NIH | SAM001246596 | Toradol                                                 |
| 2051 P07 | X | 707    | 720    | -0.59826619 | 953    | 960    | 0.27840571  | 3282958  | -0.96062506 | 3547453 | -0.25755292   | experimental | NIH | SAM001246603 | Valdecobix                                              |
| 2051 P08 | X | 1032   | 1040   | 0.22314614  | 873    | 880    | -0.59826544 | 3277241  | -0.96987897 | 3444159 | -0.46266832   | experimental | NIH | SAM001246555 | Ethylestrenol                                           |
| 2051 P09 | X | 1070   | 1080   | 0.31918819  | 673    | 680    | 0.02792824  | 3205013  | -1.08679192 | 3140964 | -1.06473584   | experimental | NIH | SAM001246665 | Fenoldopam Mesylate                                     |
| 2051 P10 | X | 1108   | 1120   | 0.41523025  | 110    | 920    | 0.14377407  | 3029005  | -1.37168994 | 3184021 | -0.97923568   | experimental | NIH | SAM001246599 | Citalopram Hydrobromide                                 |
| 2051 P11 | X | 2191   | 2200   | -0.2422895  | 1212   | 1220   | -0.2422895  | 3258808  | -2.0842125  | 3278242 | -0.91496172   | experimental | NIH | SAM001246559 | Epinuridine Hydrochloride                               |
| 2051 P12 | X | 987    | 1000   | 0.10941212  | 669    | 680    | -0.61078932 | 3236174  | -1.03635269 | 3342973 | -0.66359777   | experimental | NIH | SAM001246629 | Glycopyrrate                                            |
| 2051 P13 | X | 1673   | 1680   | 1.84322398  | 1274   | 1280   | 1.28344657  | 3253436  | -1.0084113  | 3161965 | -1.02303324   | experimental | NIH | SAM001246608 | Rosiglitazone Hcl                                       |
| 2051 P14 | X | 629    | 640    | -0.79540515 | 829    | 840    | -0.10983437 | 3155266  | -1.16731566 | 3167769 | -1.01150798   | experimental | NIH | SAM001246675 | Formoterol Fumarate Dihydrate                           |
| 2051 P15 | X | 1313   | 1320   | 0.93335187  | 1310   | 1320   | 1.39616143  | 3278673  | -0.96756104 | 3158942 | -1.02903614   | experimental | NIH | SAM001246713 | Mosapride Citrate                                       |
| 2051 P16 | X | 949    | 960    | 0.01337007  | 1028   | 1040   | 0.51322834  | 3556890  | -0.51722087 | 3473023 | -0.40535182   | experimental | NIH | SAM001246602 | Telmisartan                                             |
| 2051 P17 | X | 830    | 840    | -0.28739322 | 1111   | 1120   | 0.177309872 | 3233341  | -1.04093837 | 3330616 | -0.6881356    | experimental | NIH | SAM001246587 | Mofadalin                                               |
| 2051 P18 | X | 750    | 760    | -0.48958702 | 1071   | 1080   | 0.64785998  | 3407505  | -0.75902517 | 3481626 | -0.26242566   | experimental | NIH | SAM001247074 | Adimav Sulphate                                         |
| 2051 P19 | X | 912    | 920    | -0.08014457 | 871    | 880    | 0.02146663  | 1121814  | -1.22146204 | 3072898 | -1.19989784   | experimental | NIH | SAM001246588 | Diazoxide                                               |
| 2051 P20 | X | 952    | 960    | 0.02095233  | 991    | 1000   | 0.39738251  | 3485440  | -0.6328745  | 3300441 | -0.74805541   | experimental | NIH | SAM001246872 | Ranolazine Dihydrochloride                              |
| 2051 P21 | X | 871    | 880    | -0.18376889 | 991    | 1000   | 0.39738251  | 3032729  | -1.36566203 | 2977452 | -1.38942874   | experimental | NIH | SAM001246534 | Dichloroacetic Acid                                     |
| 2051 P22 | X | 1228   | 1240   | 0.71852095  | 1270   | 1280   | 1.27092227  | 3151857  | -1.17283369 | 3070605 | -1.20445077   | experimental | NIH | SAM001246870 |                                                         |
| 2051 P23 | E | 790    | 1680   | -0.38849012 | 825    | 1360   | -0.12235825 | 54221    | -6.18686921 | 57642   | -7.18742262   | empty        |     |              |                                                         |
| 2051 P24 | P | 304500 | 304960 | 767.215008  | 181704 | 182120 | 566.204077  | 2819164  | -1.71135226 | 2840330 | -1.66171786   | empty        |     |              |                                                         |
| 2052 A01 | N | 1674   | 1680   | 0.61709919  | 2198   | 2200   | 2.22940244  | 2551811  | -1.56124526 | 2859326 | -1.50151987   | empty        |     |              |                                                         |
| 2052 A02 | E | 110    | 120    | -1.87295017 | 29     | 40     | -2.48202533 | 52977    | -5.8647315  | 52062   | -6.19509352   | empty        |     |              |                                                         |
| 2052 A03 | X | 1594   | 1600   | 0.48973093  | 1635   | 1640   | 1.00647305  | 2143871  | -2.2637986  | 2415953 | -2.24282124   | experimental | NIH | SAM001246806 | Bestatin                                                |
| 2052 A04 | E | 72     | 80     | -1.93345009 | 70     | 80     | -2.39296653 | 55869    | -5.8597509  | 55621   | -6.18914309   | empty        |     |              |                                                         |
| 2052 A05 | X | 1232   | 1240   | -0.08661041 | 1677   | 1680   | 1.09770402  | 2927859  | -0.91361625 | 3459736 | -0.49767108   | experimental | NIH | SAM001246862 | Tryptoline                                              |
| 2052 A06 | E | 33     | 40     | -1.99554211 | 31     | 40     | -2.477681   | 54236    | -5.86256325 | 55548   | -6.18926515   | empty        |     |              |                                                         |
| 2052 A07 | X | 911    | 920    | -0.59767553 | 1554   | 1560   | 0.83052762  | 2926539  | -0.91588955 | 3777228 | 0.03315612    | experimental | NIH | SAM001246891 | Mepirizole                                              |
| 2052 A08 | E | 72     | 80     | -1.93345009 | 69     | 80     | -2.39513869 | 56225    | -5.8591378  | 57156   | -6.18657667   | empty        |     |              |                                                         |
| 2052 A09 | X | 1629   | 1640   | 0.54545455  | 1071   | 2000   | 1.78193627  | 34486056 | -0.02117855 | 3945964 | 0.31527239    | experimental | NIH | SAM001246869 | Homoveratrylamine                                       |
| 2052 A10 | E | 69     | 80     | -1.9382264  | 108    | 120    | -2.31042422 | 53209    | -5.8643195  | 57019   | -6.18680572   | empty        |     |              |                                                         |
| 2052 A11 | X | 1912   | 1920   | 0.99601974  | 1396   | 2000   | 1.79062493  | 3406685  | -0.0889832  | 3439000 | -0.5323404    | experimental | NIH | SAM001246857 | Dehydrochloric Acid                                     |
| 2052 A12 | E | 107    | 120    | -1.87772648 | 70     | 80     | -2.39296653 | 54594    | -5.8619467  | 53688   | -6.19237495   | empty        |     |              |                                                         |
| 2052 A13 | X | 2437   | 2440   | 1.83187391  | 1519   | 1520   | 0.75450181  | 3617397  | 0.27390453  | 3526079 | -0.38674964   | experimental | NIH | SAM001246906 | Medroxyprogesterone                                     |
| 2052 A14 | E | 68     | 80     | -1.9398185  | 0      | 0      | -2.54501814 | 54214    | -5.86260114 | 56286   | -6.18803126   | empty        |     |              |                                                         |
| 2052 A15 | X | 1557   | 1560   | 0.43082312  | 1398   | 1400   | 0.49166974  | 3294950  | -0.28141296 | 3904432 | 0.24583342    | experimental | NIH | SAM001247092 | Nafadotride                                             |
| 2052 A16 | E | 110    | 120    | -1.87295017 | 67     | 70     | -2.39707856 | 4907143  | -5.87017364 | 49817   | -6.20110166   | empty        |     |              |                                                         |
| 2052 A17 | X | 1996   | 2000   | 1.12975641  | 1436   | 1440   | 0.57421205  | 3678669  | -0.37942703 | 2970261 | -5.16204333   | experimental | NIH | SAM001247091 | Methanesulfonamide, N-[4-[1-[2-(6-methyl-2-pyridinyl)]  |
| 2052 A18 | E | 110    | 120    | -1.87295017 | 112    | 120    | -2.30173556 | 55220    | -5.86086861 | 53681   | -6.19238666</ |              |     |              |                                                         |

|          |   |        |        |             |             |        |             |             |             |             |             |              |              |              |                                                         |                    |
|----------|---|--------|--------|-------------|-------------|--------|-------------|-------------|-------------|-------------|-------------|--------------|--------------|--------------|---------------------------------------------------------|--------------------|
| 2052 B13 | X |        | 910    | 920         | -0.59926763 | 193    | 200         | -2.12579013 | 2213213     | -2.14437797 | 1781971     | -3.30279151  | experimental | NIH          | SAM001247099                                            |                    |
| 2052 B14 | E |        | 74     | 80          | -1.93026588 | 77     | 80          | -2.37776137 | 62503       | -5.84832584 | 60038       | -6.18175814  | empty        |              |                                                         |                    |
| 2052 B15 | E |        | 990    | 1000        | -0.47189938 | 632    | 640         | -1.17220991 | 3878071     | 0.7228367   | 4158378     | 0.6704156    | empty        |              |                                                         |                    |
| 2052 B16 | E |        | 33     | 40          | -1.99554641 | 114    | 120         | -2.29739123 | 60300       | -5.85211986 | 57574       | -6.18507778  | empty        |              |                                                         |                    |
| 2052 B17 | E |        | 1191   | 1200        | -0.15188664 | 1153   | 1160        | -0.04051089 | 3884892     | 0.73458381  | 4241626     | 0.80960116   | empty        |              |                                                         |                    |
| 2052 B18 | E |        | 113    | 120         | -1.86817386 | 73     | 80          | -2.38645003 | 61138       | -5.85067664 | 59598       | -6.18249379  | empty        |              |                                                         |                    |
| 2052 B19 | E |        | 872    | 880         | -0.65976755 | 953    | 960         | -0.47494407 | 3586610     | 0.22088322  | 3988297     | 0.38605057   | empty        |              |                                                         |                    |
| 2052 B20 | E |        | 155    | 160         | -1.80130552 | 153    | 160         | -2.21267676 | 62357       | -5.84857728 | 58947       | -6.18358223  | empty        |              |                                                         |                    |
| 2052 B21 | E |        | 753    | 760         | -0.84922783 | 1232   | 1240        | 0.13109021  | 3382079     | -0.1313596  | 3802681     | 0.07571198   | empty        |              |                                                         |                    |
| 2052 B22 | E |        | 155    | 160         | -1.80130552 | 192    | 200         | -2.12796228 | 58609       | -5.85503208 | 59288       | -6.18303121  | empty        |              |                                                         |                    |
| 2052 B23 | E | 489    | 800    | -1.26954307 | 637         | 1120   | -1.16134488 | 60791       | -5.85127424 | 59401       | -6.18444951 | empty        |              |              |                                                         |                    |
| 2052 B24 | P | 104633 | 105360 | 164.538499  | 163270      | 164240 | 352.104503  | 2720783     | -1.27024207 | 3111958     | -0.99680035 | empty        |              |              |                                                         |                    |
| 2052 C01 | N |        | 951    | 960         | -0.5339914  | 1395   | 1400        | 0.48515325  | 3350091     | -0.18644926 | 3517585     | -0.40095109  | empty        |              |                                                         |                    |
| 2052 C02 | E |        | 37     | 40          | -1.9891737  | 35     | 40          | -2.46899233 | 60556       | -5.85167896 | 57399       | -6.18617039  | empty        |              |                                                         |                    |
| 2052 C03 | X |        | 28     | 40          | -2.00350263 | 71     | 80          | -2.39079436 | 1311332     | -3.69759537 | 1475378     | -3.81539625  | experimental | NIH          | SAM001246774                                            | Toremifene Citrate |
| 2052 C04 | E |        | 76     | 80          | -1.92708167 | 76     | 80          | -2.37993353 | 58504       | -5.85521291 | 58186       | -6.18485457  | empty        |              |                                                         |                    |
| 2052 C05 | X | 1187   | 1200   | -0.15825505 | 1154        | 1160   | -0.03833873 | 1943210     | -2.60937652 | 2664412     | -1.82740415 | experimental | NIH          | SAM001246863 | Fluphenazine Hydrochloride                              |                    |
| 2052 C06 | E |        | 34     | 40          | -1.99395001 | 33     | 40          | -2.47333666 | 58559       | -5.85511819 | 57933       | -6.18527757  | empty        |              |                                                         |                    |
| 2052 C07 | X |        | 587    | 600         | -1.11351696 | 1191   | 1200        | 0.04203141  | 2855217     | -1.03872014 | 3907877     | 0.25159325   | experimental | NIH          | SAM001246876                                            | 6-azauridine       |
| 2052 C08 | E |        | 76     | 80          | -1.92708167 | 111    | 120         | -2.30390773 | 58289       | -5.85558318 | 57005       | -6.18682913  | empty        |              |                                                         |                    |
| 2052 C09 | X |        | 745    | 760         | -0.86196466 | 1709   | 1720        | 1.16721333  | 3495158     | 0.0633848   | 4150591     | 0.65739621   | experimental | NIH          | SAM001246913                                            | Tinidazole         |
| 2052 C10 | E |        | 74     | 80          | -1.93026588 | 72     | 80          | -2.3886222  | 55770       | -5.8599214  | 56226       | -6.18813157  | empty        |              |                                                         |                    |
| 2052 C11 | X | 1149   | 1160   | -0.21875498 | 833         | 840    | -0.73560397 | 3648129     | 0.32683111  | 3998842     | 0.40368117  | experimental | NIH          | SAM001246884 | Cefaclor                                                |                    |
| 2052 C12 | E |        | 113    | 120         | -1.86817386 | 75     | 80          | -2.3821057  | 57228       | -5.85741043 | 56241       | -6.18810649  | empty        |              |                                                         |                    |
| 2052 C13 | X | 953    | 960    | -0.5308072  | 677         | 680    | -1.07446185 | 3777667     | 0.54992116  | 4046768     | 0.48381051  | experimental | NIH          | SAM001246907 | Pinacidil Monohydrate                                   |                    |
| 2052 C14 | E |        | 73     | 80          | -1.93450999 | 114    | 120         | -2.38427786 | 57642       | -5.85665749 | 57398       | -6.19204056  | empty        |              |                                                         |                    |
| 2052 C15 | X | 1635   | 1640   | 0.55500716  | 1195        | 1200   | 0.05072007  | 4375831     | -0.08097784 | 4668951     | 1.52406202  | experimental | NIH          | SAM001246885 | Desoximetasone                                          |                    |
| 2052 C16 | E |        | 112    | 120         | -1.86976596 | 73     | 80          | -2.38645003 | 55811       | -5.85985079 | 55496       | -6.18935209  | empty        |              |                                                         |                    |
| 2052 C17 | X | 954    | 960    | -0.52921509 | 874         | 880    | -0.64654517 | 3676556     | 0.37578802  | 4100372     | 0.57343312  | experimental | NIH          | SAM001247076 | 2h-indol-2-one, 1,3-dihydro-1-phenyl-3,3-bis(4-pyridiny |                    |
| 2052 C18 | E |        | 73     | 80          | -1.93185798 | 75     | 80          | -2.3821057  | 59222       | -5.85397637 | 57275       | -6.18637771  | empty        |              |                                                         |                    |
| 2052 C19 | X | 995    | 1000   | -0.46393886 | 755         | 760    | -0.90503291 | 4111130     | 1.12421038  | 4393387     | 1.06333627  | experimental | NIH          | SAM001246815 | Chlordiazepoxide                                        |                    |
| 2052 C20 | E |        | 153    | 160         | -1.80448973 | 194    | 200         | -2.12361796 | 57768       | -5.85648045 | 58559       | -6.18423094  | empty        |              |                                                         |                    |
| 2052 C21 | X | 1074   | 1080   | -0.33816271 | 912         | 920    | -0.56400287 | 2889925     | -0.9789461  | 3248640     | -0.85061068 | experimental | NIH          | SAM001246883 | Cyproheptadine Hydrochloride                            |                    |
| 2052 C22 | E |        | 115    | 120         | -1.86658175 | 154    | 160         | -2.21050459 | 56893       | -5.85805213 | 57114       | -6.18699545  | empty        |              |                                                         |                    |
| 2052 C23 | E |        | 429    | 720         | -1.36506926 | 660    | 1040        | -1.11138867 | 57265       | -5.85734671 | 58431       | -6.18444495  | empty        |              |                                                         |                    |
| 2052 C24 | P | 98597  | 99120  | 154.928515  | 128336      | 129160 | 276.222061  | 2709787     | -1.28917935 | 3510920     | -0.41209456 | empty        |              |              |                                                         |                    |
| 2052 D01 | N |        | 1314   | 1320        | 0.04394205  | 993    | 1000        | -0.38805743 | 3433587     | -0.04265264 | 3212784     | -0.91055972  | empty        |              |                                                         |                    |
| 2052 D02 | E |        | 110    | 120         | -1.87295017 | 113    | 120         | -2.29956339 | 61508       | -5.85003943 | 61459       | -6.17938232  | empty        |              |                                                         |                    |
| 2052 D03 | X | 2116   | 2120   | 1.32080879  | 1156        | 1160   | -0.0339944  | 3408379     | -0.0860658  | 3242478     | -0.86091317 | experimental | NIH          | SAM001246570 | Vincristine Sulfate                                     |                    |
| 2052 D04 | E |        | 68     | 80          | -1.93185798 | 114    | 120         | -2.29739123 | 60368       | -5.85200273 | 60313       | -6.18129836  | empty        |              |                                                         |                    |
| 2052 D05 | X | 1714   | 1720   | 0.68077618  | 155         | 160    | -2.29739123 | 5592385     | 3.67524217  | 6474266     | 1.55360382  | experimental | NIH          | SAM001246598 | Irinotecan Hcl (trihydrate)                             |                    |
| 2052 D06 | E |        | 70     | 80          | -1.93663429 | 115    | 160         | -2.0833243  | 71267       | -5.8323235  | 58558       | -6.18423261  | empty        |              |                                                         |                    |
| 2052 D07 | X | 1635   | 1640   | 0.55500716  | 913         | 920    | -0.5618307  | 4245355     | 1.35537237  | 4262752     | 0.84492254  | experimental | NIH          | SAM001246851 | Huperzine A                                             |                    |
| 2052 D08 | E |        | 72     | 80          | -2.38427786 | 74     | 80          | -2.38427786 | 59121       | -5.85415031 | 61260       | -6.17971503  | empty        |              |                                                         |                    |
| 2052 D09 | X | 1075   | 1080   | -0.33657061 | 991         | 1000   | -0.39240176 | 3957528     | 0.85967736  | 4455455     | 1.16711017  | experimental | NIH          | SAM001247102 | Metylperon                                              |                    |
| 2052 D10 | E |        | 74     | 80          | -1.93026588 | 114    | 120         | -2.29739123 | 56627       | -5.85844547 | 57269       | -6.18638774  | empty        |              |                                                         |                    |
| 2052 D11 | X | 993    | 1000   | -0.46712307 | 1075        | 1080   | -0.20993983 | 3837486     | 0.65294313  | 4413516     | 1.09699073  | experimental | NIH          | SAM001247065 |                                                         |                    |
| 2052 D12 | E |        | 73     | 80          | -1.93185798 | 674    | 80          | -2.38427786 | 59362       | -5.85373526 | 57547       | -6.18609545  | empty        |              |                                                         |                    |
| 2052 D13 | X | 1154   | 1160   | -0.21075446 | 1076        | 680    | -0.08097834 | 3998605     | 0.95214288  | 4577409     | 1.10097979  | experimental | NIH          | SAM001247101 | Thiophene, 5-bromo-2-(4-fluorophenyl)-3-[4-(methylsul   |                    |
| 2052 D14 | E |        | 114    | 120         | -1.86658175 | 75     | 80          | -2.3821057  | 62099       | -5.84902161 | 63740       | -6.17556862  | empty        |              |                                                         |                    |
| 2052 D15 | E |        | 592    | 600         | -1.10555644 | 873    | 880         | -0.64871734 | 3680272     | 0.38218771  | 4394341     | 1.0649313    | empty        |              |                                                         |                    |
| 2052 D16 | E |        | 76     | 80          | -1.92708167 | 114    | 120         | -2.29739123 | 58323       | -5.85552463 | 56921       | -6.18696957  | empty        |              |                                                         |                    |
| 2052 D17 | E |        | 633    | 640         | -1.04028021 | 874    | 880         | -0.64654517 | 3309883     | -0.25569539 | 4158275     | 0.67024339   | empty        |              |                                                         |                    |
| 2052 D18 | E |        | 196    | 200         | -1.73602929 | 115    | 120         | -2.29521906 | 62900       | -5.84764213 | 60383       | -6.18118132  | empty        |              |                                                         |                    |
| 2052 D19 | E |        | 633    | 640         | -1.04028021 | 594    | 600         | -1.25475161 | 3368989     | -0.15390317 | 3869972     | 0.18821841   | empty        |              |                                                         |                    |
| 2052 D20 | E |        | 115    | 120         | -1.86498965 | 154    | 160         | -2.21050459 | 60643       | -5.85152913 | 61785       | -6.17883726  | empty        |              |                                                         |                    |
| 2052 D21 | E |        | 910    | 920         | -0.59926763 | 1071   | 1080        | -0.21862849 | 3326419     | -0.22721712 | 3791619     | 0.05721699   | empty        |              |                                                         |                    |
| 2052 D22 | E |        | 155    | 160         | -1.80130552 | 234    | 240         | -2.03673132 | 61078       | -5.85077997 | 57576       | -6.18587445  | empty        |              |                                                         |                    |
| 2052 D23 | E |        | 339    | 560         | -1.50835854 | 327    | 680         | -1.8347199  | 62254       | -5.84875467 | 59040       | -6.18342674  | empty        |              |                                                         |                    |
| 2052 D24 | P | 74186  | 74720  | 116.063684  | 118688      | 119480 | 255.265004  | 3074544     | -0.66099568 | 3408838     | -0.58276942 | empty        |              |              |                                                         |                    |
| 2052 E01 | N |        | 1153   | 1160        | -0.21238656 | 1033   | 1040        | -0.3011708  | 3163541     | -0.50772525 | 3118141     | -1.06879702  | empty        |              |                                                         |                    |
| 2052 E02 | E |        | 73     | 80          | -1.93185798 | 73     | 80          | -2.38645003 | 60925       | -5.85104347 | 62492       | -6.1776552   | empty        |              |                                                         |                    |
| 2052 E03 | X | 1069   | 1080   | -0.34612323 | 1192        | 1200   | 0.04420358  | 3672546     | 0.36888201  | 4471296     | 1.19355335  | experimental | NIH          | SAM001246784 | Goserelin Acetate                                       |                    |
| 2052 E04 | E |        | 74     | 80          | -1.93026588 | 32     | 40          | -2.47550883 | 57702       | -5.85594111 | 59211       | -6.18314083  | empty        |              |                                                         |                    |
| 2052 E05 | X | 703    | 720    | -0.92883299 | 1269        | 1280   | 0.21146035  | 2849881     | -1.04790978 | 3376918     | -0.63613771 | experimental | NIH          | SAM001246791 | Palonosetron Hcl                                        |                    |
| 2052 E06 | E |        | 75     | 80          | -1.92867378 | 33     | 40          | -2.47333666 | 53158       | -5.86441978 | 57952       | -6.18524581  | empty        |              |                                                         |                    |
| 2052 E07 | X | 951    | 960    | -0.5339914  | 1395        | 1400   | -0.29682647 | 2827870     | -1.08581708 | 4366530     | 1.01843301  | experimental | NIH          | SAM001246889 | Reichstein◆◆s Substance◆◆s                              |                    |
| 2052 E08 | E |        | 74     | 80          | -1.93026588 | 74     | 80          | -2.38427786 | 50509       | -5.86898188 | 57614       | -6.18581092  | empty        |              |                                                         |                    |
| 2052 E09 | X | 832    | 840    | -0.72345168 | 1073        | 1080   | -0.21428416 | 3665616     | 0.35694718  | 4048468     | 0.48665298  | experimental | NIH          | SAM001246912 | Xanthinol Nicotinate                                    |                    |
| 2052 E10 | E |        | 74     | 80          | -1.93185798 | 74     | 80          | -2.38427786 | 50922       | -5.86827061 | 51532       | -6.18761116  | empty        |              |                                                         |                    |
| 2052 E11 | X | 993    | 1000   | -0.46712307 | 712         | 720    | -0.98843604 | 4652707     | 0.8591305   | 4235830     | 0.7999106   | experimental | NIH          | SAM001246858 | 1-benzylimidazole                                       |                    |
| 2052 E12 | E |        | 114    | 120         | -1.86658175 | 114    | 120         | -2.29739123 | 47587       | -5.87401414 | 55490       | -6.18936212  | empty        |              |                                                         |                    |
| 2052 E13 | X | 793    | 800    | -0.7855437  | 1075        | 1080   | -0.20993983 | 3606502     | 0.25514118  | 3934897     | 0.29676904  | experimental | NIH          | SAM001246908 | 7-nitroindazole                                         |                    |
| 2052 E14 | X |        | 74     | 80          | -1.93026588 | 33     | 40          | -2.47333666 | 52778       | -5.86507421 | 57348       | -6.18625566  | empty        |              |                                                         |                    |
| 2052 E15 | X | 1035   | 1040   | -0.40025474 | 1114        | 1120   | -0.12522536 | 4216047     | 1.3048982   | 4656365     | 1.5030194   | experimental | NIH          | SAM001246557 | Dexchlorpheniramine Maleate                             |                    |
| 2052 E16 | E |        | 74     | 80          | -1.9        |        |             |             |             |             |             |              |              |              |                                                         |                    |



|          |   |        |        |             |        |        |             |         |             |         |             |  |              |     |              |                                                        |
|----------|---|--------|--------|-------------|--------|--------|-------------|---------|-------------|---------|-------------|--|--------------|-----|--------------|--------------------------------------------------------|
| 2052 F07 | X | 1475   | 1480   | 0.30027066  | 795    | 800    | -0.81814627 | 4095855 | 1.09790381  | 3777713 | 0.03396701  |  |              |     |              |                                                        |
| 2052 F08 | E | 71     | 80     | -1.93504219 | 34     | 40     | -2.4711645  | 50679   | -5.86868911 | 55022   | -6.19014459 |  | experimental | NIH | SAM001246592 | Sibutramine Hcl                                        |
| 2052 F09 | X | 1555   | 1560   | 0.42763891  | 1154   | 1160   | -0.03833873 | 4692253 | 2.12501909  | 4674497 | 1.53333499  |  | empty        | NIH | SAM001246773 | Parecoxib Na                                           |
| 2052 F10 | E | 120    | 120    | -1.86976596 | 112    | 120    | -2.30173556 | 50938   | -5.86824306 | 55930   | -6.18862647 |  | experimental | NIH | SAM001247067 |                                                        |
| 2052 F11 | X | 1112   | 1120   | -0.27766579 | 1473   | 1480   | 0.6545833   | 3949742 | 0.84638833  | 3876389 | 0.19894724  |  | empty        |     |              |                                                        |
| 2052 F12 | E | 73     | 80     | -1.93185798 | 73     | 80     | -2.38645003 | 51267   | -5.86767645 | 56729   | -6.18729059 |  | empty        |     |              |                                                        |
| 2052 F13 | X | 1032   | 1040   | -0.40503105 | 833    | 840    | -0.73560397 | 2837639 | -1.06899293 | 3235046 | -0.87333901 |  | experimental | NIH | SAM001247103 | 5-nonyloxytryptamine                                   |
| 2052 F14 | E | 114    | 120    | -1.86658175 | 35     | 40     | -2.46899233 | 50452   | -5.86908004 | 55401   | -6.18951092 |  | empty        |     |              |                                                        |
| 2052 F15 | E | 794    | 800    | -0.7839516  | 873    | 880    | -0.64871734 | 3887426 | 0.73894786  | 4032957 | 0.46071936  |  | empty        |     |              |                                                        |
| 2052 F16 | E | 75     | 80     | -1.92867378 | 114    | 120    | -2.29739123 | 49009   | -5.87156518 | 56209   | -6.18815999 |  | empty        |     |              |                                                        |
| 2052 F17 | E | 753    | 760    | -0.84922783 | 1113   | 1120   | -0.12739753 | 3742853 | 0.48996456  | 4212227 | 0.76044783  |  | empty        |     |              |                                                        |
| 2052 F18 | E | 173    | 120    | -1.86335795 | 115    | 120    | -2.29956339 | 51256   | -5.86769554 | 57312   | -6.18578083 |  | empty        |     |              |                                                        |
| 2052 F19 | E | 474    | 480    | -1.29342461 | 1033   | 1040   | -0.3011708  | 3430695 | -0.04763323 | 3740051 | -0.02900155 |  | empty        |     |              |                                                        |
| 2052 F20 | E | 156    | 160    | -1.79971342 | 114    | 120    | -2.29739123 | 61139   | -5.85067492 | 58122   | -6.18496158 |  | empty        |     |              |                                                        |
| 2052 F21 | E | 748    | 760    | -0.85718835 | 710    | 720    | -1.00278037 | 3574913 | 0.20073868  | 3505540 | -0.4210896  |  | empty        |     |              |                                                        |
| 2052 F22 | E | 275    | 280    | -1.61025314 | 234    | 240    | -2.03673132 | 59218   | -5.85398326 | 60170   | -6.18153745 |  | empty        |     |              |                                                        |
| 2052 F23 | E | 363    | 680    | -1.47014807 | 436    | 840    | -1.59795382 | 56515   | -5.85863836 | 59522   | -6.18262086 |  | empty        |     |              |                                                        |
| 2052 F24 | P | 107085 | 107680 | 168.442286  | 136560 | 137400 | 294.085953  | 3043327 | -0.71475752 | 3365173 | -0.65577463 |  | empty        |     |              |                                                        |
| 2052 G01 | N | 513    | 520    | -1.23132559 | 914    | 920    | -0.55965854 | 3391904 | -0.11443901 | 3604548 | -0.23555428 |  | empty        |     |              |                                                        |
| 2052 G02 | E | 76     | 80     | -1.92708167 | 73     | 80     | -2.38645003 | 59483   | -5.85352688 | 58703   | -6.18399018 |  | empty        |     |              |                                                        |
| 2052 G03 | X | 753    | 760    | -0.84922783 | 1312   | 1320   | 0.30486348  | 3318274 | -0.24124442 | 3923827 | 0.27826068  |  | experimental | NIH | SAM001246678 | Secoisolaricresinol                                    |
| 2052 G04 | E | 35     | 40     | -1.9923579  | 74     | 80     | -2.38427786 | 51964   | -5.86647608 | 64886   | -6.17365258 |  | empty        |     |              |                                                        |
| 2052 G05 | X | 704    | 720    | -0.92724089 | 789    | 800    | -0.83117927 | 3226660 | -0.39902185 | 4215834 | 0.76647852  |  | experimental | NIH | SAM001246874 | Naproxen Sodium                                        |
| 2052 G06 | E | 36     | 40     | -1.9907658  | 67     | 80     | -2.3821057  | 48725   | -5.87205428 | 57168   | -6.18655661 |  | empty        |     |              |                                                        |
| 2052 G07 | X | 472    | 480    | -1.29660882 | 754    | 680    | -1.08097834 | 3380150 | -0.13468172 | 3972811 | 0.36015893  |  | experimental | NIH | SAM001246894 | 3-pyridinemethanol                                     |
| 2052 G08 | E | 76     | 80     | -1.92708167 | 73     | 80     | -2.46899233 | 49887   | -5.8689912  | 55701   | -6.18815915 |  | empty        |     |              |                                                        |
| 2052 G09 | X | 792    | 800    | -0.78713581 | 954    | 960    | -0.47277119 | 3843521 | 0.6333477   | 4006116 | 0.15842885  |  | experimental | NIH | SAM001246896 | Synephrine                                             |
| 2052 G10 | E | 33     | 40     | -1.99554211 | 72     | 80     | -2.3886222  | 48074   | -5.87317543 | 57152   | -6.18658336 |  | empty        |     |              |                                                        |
| 2052 G11 | X | 1393   | 1400   | 0.1697182   | 1472   | 1480   | 0.65241002  | 3226976 | -0.39847763 | 3080495 | -1.13173883 |  | experimental | NIH | SAM001246523 | Duloxetine Hcl                                         |
| 2052 G12 | E | 71     | 80     | -1.93504219 | 34     | 40     | -2.47550883 | 48011   | -5.87328393 | 55495   | -6.18935376 |  | empty        |     |              |                                                        |
| 2052 G13 | X | 1674   | 1680   | 0.61709919  | 1074   | 1080   | -0.212112   | 3930498 | 0.81312636  | 4004224 | 0.41267954  |  | experimental | NIH | SAM001246909 | 5-methoxytryptamine                                    |
| 2052 G14 | E | 72     | 80     | -1.93345009 | 73     | 80     | -2.38645003 | 49560   | -5.87061624 | 56237   | -6.18811318 |  | empty        |     |              |                                                        |
| 2052 G15 | X | 995    | 1000   | -0.46393886 | 1235   | 1240   | 0.13760671  | 4203851 | 1.28389427  | 4611611 | 1.42819345  |  | experimental | NIH | SAM001247088 | Guanidine, N-cyano-n'-(1,1-dimethylpropyl)-n"-3-pyridi |
| 2052 G16 | E | 73     | 80     | -1.93185798 | 34     | 40     | -2.4711645  | 45379   | -5.87181725 | 52727   | -6.18719024 |  | empty        |     |              |                                                        |
| 2052 G17 | X | 1275   | 1280   | -0.01814998 | 1115   | 1120   | -0.12305532 | 3577807 | 0.20572272  | 3738309 | -0.03191407 |  | experimental | NIH | SAM001246900 | Guanzoline                                             |
| 2052 G18 | E | 153    | 160    | -1.80448973 | 113    | 120    | -2.29956339 | 49225   | -5.87119318 | 56882   | -6.18703478 |  | empty        |     |              |                                                        |
| 2052 G19 | X | 876    | 880    | -0.65339914 | 1154   | 1160   | -0.03833873 | 3474548 | 0.0278903   | 4214295 | 0.7639054   |  | experimental | NIH | SAM001246818 | Cefdinir                                               |
| 2052 G20 | E | 73     | 80     | -1.93185798 | 152    | 160    | -2.21484893 | 52956   | -5.86476766 | 58259   | -6.18473252 |  | empty        |     |              |                                                        |
| 2052 G21 | X | 1395   | 1400   | 0.1729024   | 1074   | 1080   | -0.212112   | 3354905 | -0.1781586  | 3394570 | -0.60662465 |  | experimental | NIH | SAM001246879 | Corticosterone                                         |
| 2052 G22 | E | 232    | 240    | -1.67871358 | 193    | 200    | -2.12579013 | 58971   | -5.85440864 | 57820   | -6.18544665 |  | empty        |     |              |                                                        |
| 2052 G23 | E | 589    | 640    | -1.20745104 | 493    | 880    | -1.47141623 | 68030   | -5.83880725 | 55727   | -6.14040263 |  | empty        |     |              |                                                        |
| 2052 G24 | P | 119428 | 120000 | 188.093616  | 144827 | 145560 | 312.043248  | 3245485 | -0.36660147 | 3679696 | -0.12991142 |  | empty        |     |              |                                                        |
| 2052 H01 | N | 1036   | 1040   | -0.39866263 | 634    | 640    | -1.16786498 | 3610108 | 0.26135143  | 3467359 | -0.48492589 |  | empty        |     |              |                                                        |
| 2052 H02 | E | 74     | 80     | -1.93026588 | 75     | 80     | -2.3821057  | 59035   | -5.85429842 | 58199   | -6.18483284 |  | empty        |     |              |                                                        |
| 2052 H03 | X | 954    | 960    | -0.52921509 | 1032   | 1040   | -0.30334296 | 3691884 | 0.40218587  | 3680064 | -0.12929615 |  | experimental | NIH | SAM001246659 | Mirtazapine                                            |
| 2052 H04 | E | 34     | 40     | -1.99395001 | 74     | 80     | -2.38427786 | 50716   | -5.86862538 | 57748   | -6.18558688 |  | empty        |     |              |                                                        |
| 2052 H05 | X | 1155   | 1160   | -0.20920236 | 834    | 840    | -0.7334318  | 3002158 | -0.78565868 | 3067791 | -1.15297914 |  | experimental | NIH | SAM001246545 | 8-chloro-11-piperidin-4-ylidene-6,11-dihydro-5h-benzo[ |
| 2052 H06 | E | 73     | 80     | -1.93185798 | 34     | 40     | -2.4711645  | 48887   | -5.87177528 | 51817   | -6.18717021 |  | empty        |     |              |                                                        |
| 2052 H07 | X | 1036   | 1040   | -0.39866263 | 1075   | 1080   | -0.20993983 | 3991335 | 0.918997    | 4150524 | 0.65277918  |  | experimental | NIH | SAM001246833 | Lorazepam                                              |
| 2052 H08 | E | 73     | 80     | -1.93185798 | 74     | 80     | -2.38427786 | 48325   | -5.87274316 | 53150   | -6.19327446 |  | empty        |     |              |                                                        |
| 2052 H09 | X | 1109   | 1120   | -0.2824391  | 868    | 880    | -0.65957817 | 4148594 | 1.18873079  | 3838366 | 0.13537511  |  | experimental | NIH | SAM001247070 | Pergolide Mesylate Salt                                |
| 2052 H10 | E | 32     | 40     | -1.99713421 | 74     | 80     | -2.38427786 | 48283   | -5.87281549 | 55448   | -6.18943234 |  | empty        |     |              |                                                        |
| 2052 H11 | X | 1313   | 1320   | 0.04234994  | 1072   | 1080   | -0.21645633 | 3832182 | 0.64380677  | 4299248 | 0.90594162  |  | experimental | NIH | SAM001246590 | Stanozolol                                             |
| 2052 H12 | E | 113    | 120    | -1.86817386 | 114    | 120    | -2.29739123 | 49700   | -5.87037514 | 54475   | -6.19105914 |  | empty        |     |              |                                                        |
| 2052 H13 | X | 911    | 920    | -0.59767553 | 1033   | 1040   | -0.3011708  | 2757683 | -1.20669297 | 3311672 | -0.74522503 |  | experimental | NIH | SAM001247096 | Salmeterol                                             |
| 2052 H14 | E | 75     | 80     | -1.92867378 | 114    | 120    | -2.29739123 | 49014   | -5.87155656 | 54728   | -6.19063614 |  | empty        |     |              |                                                        |
| 2052 H15 | E | 713    | 720    | -0.91291196 | 672    | 680    | -1.08532668 | 3426578 | -0.05472352 | 4229968 | 0.7901097   |  | empty        |     |              |                                                        |
| 2052 H16 | E | 75     | 80     | -1.92867378 | 116    | 120    | -2.2930469  | 47730   | -5.87376787 | 56725   | -6.18729727 |  | empty        |     |              |                                                        |
| 2052 H17 | E | 673    | 680    | -0.97659608 | 553    | 560    | -1.34381041 | 3468989 | 0.01831661  | 4305695 | 0.91672061  |  | empty        |     |              |                                                        |
| 2052 H18 | E | 35     | 40     | -1.9923579  | 116    | 120    | -2.2930469  | 52314   | -5.86587331 | 56838   | -6.18710835 |  | empty        |     |              |                                                        |
| 2052 H19 | E | 754    | 760    | -0.84763573 | 713    | 720    | -0.99626387 | 3230469 | -0.392462   | 4006568 | 0.41659857  |  | empty        |     |              |                                                        |
| 2052 H20 | E | 75     | 80     | -1.92867378 | 234    | 240    | -2.03673132 | 49401   | -5.87089007 | 57529   | -6.18595304 |  | empty        |     |              |                                                        |
| 2052 H21 | E | 632    | 640    | -1.04187231 | 952    | 960    | -0.47711623 | 3603396 | 0.24979204  | 3843373 | 0.14404263  |  | empty        |     |              |                                                        |
| 2052 H22 | E | 75     | 80     | -1.92867378 | 193    | 200    | -2.12579013 | 60981   | -5.85094702 | 59517   | -6.18262922 |  | empty        |     |              |                                                        |
| 2052 H23 | E | 379    | 640    | -1.44467441 | 542    | 880    | -1.36770424 | 61077   | -5.85078169 | 60609   | -6.18080346 |  | empty        |     |              |                                                        |
| 2052 H24 | P | 88687  | 89040  | 139.150772  | 113998 | 114720 | 245.077546  | 3016658 | -0.76068681 | 3375435 | -0.6386172  |  | empty        |     |              |                                                        |
| 2052 I01 | N | 634    | 640    | -1.03868811 | 1035   | 1040   | -0.29682647 | 3251724 | -0.35585668 | 3667226 | -0.15076005 |  | empty        |     |              |                                                        |
| 2052 I02 | E | 34     | 40     | -1.99395001 | 113    | 120    | -2.29956339 | 56898   | -5.85797876 | 58537   | -6.18426772 |  | empty        |     |              |                                                        |
| 2052 I03 | X | 1154   | 1160   | -0.21079446 | 1194   | 1200   | 0.04854739  | 3200459 | -0.44414515 | 3748569 | -0.01479998 |  | experimental | NIH | SAM001246796 | Raltitrexed                                            |
| 2052 I04 | E | 34     | 40     | -1.99395001 | 73     | 80     | -2.38645003 | 49423   | -5.8708521  | 57435   | -6.1861102  |  | empty        |     |              |                                                        |
| 2052 I05 | X | 834    | 840    | -0.72026747 | 1034   | 1040   | -0.29899863 | 3084051 | -0.64462274 | 4201617 | 0.67208556  |  | experimental | NIH | SAM001246875 | Mepivacaine Hydrochloride                              |
| 2052 I06 | E | 35     | 40     | -1.9923579  | 34     | 40     | -2.4711645  | 49552   | -5.87063002 | 56562   | -6.1875698  |  | empty        |     |              |                                                        |
| 2052 I07 | X | 592    | 600    | -1.10555644 | 994    | 1000   | -0.38588527 | 2520852 | -1.61456278 | 3590670 | -0.27875744 |  | experimental | NIH | SAM001246979 | Haloperidol                                            |
| 2052 I08 | E | 149    | 160    | -1.81085814 | 108    | 120    | -2.31042422 | 48594   | -5.87227989 | 54034   | -6.19179646 |  | empty        |     |              |                                                        |
| 2052 I09 | X | 2952   | 2960   | 2.65180704  | 3035   | 3040   | 0.404750527 | 3491838 | 0.0576671   | 4218699 | 0.77126862  |  | experimental | NIH | SAM001246888 | Resveratrol                                            |
| 2052 I10 |   |        |        |             |        |        |             |         |             |         |             |  |              |     |              |                                                        |



|          |   |        |        |             |        |        |             |         |             |         |             |              |     |              |                                                        |
|----------|---|--------|--------|-------------|--------|--------|-------------|---------|-------------|---------|-------------|--------------|-----|--------------|--------------------------------------------------------|
| 2052 M19 | X | 795    | 800    | -0.7823595  | 914    | 920    | -0.55965854 | 3081271 | -0.64941045 | 3872851 | 0.19303192  |              |     |              |                                                        |
| 2052 M20 | E | 74     | 80     | -1.93026588 | 74     | 80     | -2.38427786 | 52319   | -5.8658647  | 59510   | -6.18264092 | experimental | NIH | SAM001246802 | Olopatadine Hcl                                        |
| 2052 M21 | X | 1033   | 1040   | -0.40343894 | 1033   | 1040   | -0.3011708  | 3239145 | -0.37752021 | 3533405 | -0.37450102 | experimental | NIH | SAM001246860 | Nicotinamide                                           |
| 2052 M22 | E | 195    | 200    | -1.7376214  | 313    | 320    | -1.06513022 | 59968   | -5.85269161 | 59649   | -6.18240853 | empty        |     |              |                                                        |
| 2052 M23 | X | 492    | 523    | -1.64527941 | 492    | 840    | -4.761253   | 61659   | -5.84977937 | 59348   | -6.18240853 | empty        |     |              |                                                        |
| 2052 M24 | P | 90989  | 91240  | 142.815794  | 117478 | 118120 | 252.636684  | 2961787 | -0.85518553 | 3414358 | -0.57354032 | empty        |     |              |                                                        |
| 2052 N01 | N | 994    | 1000   | -0.46553097 | 952    | 960    | -0.47711623 | 3570159 | 0.19255135  | 3497765 | -0.43408892 | empty        |     |              |                                                        |
| 2052 N02 | E | 113    | 120    | -1.86817386 | 34     | 40     | -2.4711645  | 55458   | -5.86045872 | 54507   | -6.19100563 | empty        |     |              |                                                        |
| 2052 N03 | X | 1274   | 1280   | -0.01974208 | 1114   | 1120   | -0.12522536 | 2785516 | -1.15875904 | 2731329 | -1.71552302 | experimental | NIH | SAM001246705 | Amlodipine Base                                        |
| 2052 N04 | X | 72     | 80     | -1.93345009 | 34     | 40     | -2.4711645  | 48697   | -5.8721025  | 53160   | -6.19325774 | empty        |     |              |                                                        |
| 2052 N05 | E | 1395   | 1400   | 0.1729024   | 910    | 920    | -0.5683472  | 3620949 | 0.28002177  | 3678194 | -0.13242267 | experimental | NIH | SAM001246880 | Etoposide                                              |
| 2052 N06 | E | 73     | 80     | -1.93663429 | 113    | 120    | -2.29956339 | 47501   | -5.87416225 | 54763   | -6.19057762 | empty        |     |              |                                                        |
| 2052 N07 | X | 1914   | 1920   | 0.99920395  | 1273   | 1280   | 0.22014901  | 2378931 | -1.8589788  | 2491838 | -2.11593732 | experimental | NIH | SAM001246646 | Amiodarone Hydrochloride                               |
| 2052 N08 | E | 109    | 120    | -1.87454227 | 72     | 80     | -2.3886222  | 47107   | -5.8748408  | 53695   | -6.19236325 | empty        |     |              |                                                        |
| 2052 N09 | X | 1594   | 1600   | 0.48973093  | 1274   | 1280   | 0.22232118  | 4044981 | 1.01028872  | 4006370 | 0.41626752  | experimental | NIH | SAM001247071 | Ebselen                                                |
| 2052 N10 | E | 72     | 80     | -1.93345009 | 113    | 120    | -2.29956339 | 47418   | -5.87430519 | 52847   | -6.19378105 | empty        |     |              |                                                        |
| 2052 N11 | X | 1233   | 1240   | -0.08501831 | 873    | 880    | -0.64871734 | 3519242 | 0.10486221  | 4011663 | 0.4251171   | experimental | NIH | SAM001246921 | Testosterone                                           |
| 2052 N12 | E | 114    | 120    | -1.86658175 | 73     | 80     | -2.38645003 | 48822   | -5.87188723 | 59927   | -6.18194373 | empty        |     |              |                                                        |
| 2052 N13 | E | 670    | 680    | -0.98137239 | 1354   | 1360   | 0.39609445  | 4115287 | 1.13309175  | 4249145 | 0.82217247  | empty        |     |              |                                                        |
| 2052 N14 | E | 34     | 40     | -1.99395001 | 73     | 80     | -2.38645003 | 50117   | -5.86965698 | 51502   | -6.19602981 | empty        |     |              |                                                        |
| 2052 N15 | E | 913    | 920    | -0.59449132 | 793    | 800    | -0.82249061 | 3341546 | -0.20116544 | 3832703 | 0.12590692  | empty        |     |              |                                                        |
| 2052 N16 | E | 75     | 80     | -1.92867378 | 115    | 120    | -2.29521906 | 49717   | -5.87034586 | 53124   | -6.19331793 | empty        |     |              |                                                        |
| 2052 N17 | E | 671    | 680    | -0.97978029 | 830    | 840    | -0.74212047 | 3311089 | -0.25361841 | 3988696 | 0.38671768  | empty        |     |              |                                                        |
| 2052 N18 | E | 35     | 40     | -1.9923579  | 114    | 120    | -2.29739123 | 47091   | -5.87486835 | 53191   | -6.19320591 | empty        |     |              |                                                        |
| 2052 N19 | E | 1035   | 1040   | -0.40025474 | 914    | 920    | -0.55965854 | 3396574 | -0.10639634 | 3896362 | 0.23234088  | empty        |     |              |                                                        |
| 2052 N20 | E | 73     | 80     | -1.93185798 | 113    | 120    | -2.29739123 | 57363   | -5.85717794 | 57363   | -6.18000762 | empty        |     |              |                                                        |
| 2052 N21 | E | 1152   | 1160   | -0.21397867 | 1072   | 1080   | -0.21649533 | 3005193 | 0.1818181   | 3721415 | -0.0601598  | empty        |     |              |                                                        |
| 2052 N22 | E | 193    | 200    | -1.7408056  | 233    | 240    | -0.03890349 | 84729   | -5.81004827 | 55037   | -6.19011951 | empty        |     |              |                                                        |
| 2052 N23 | E | 471    | 720    | -1.29820092 | 515    | 840    | -1.42635272 | 56750   | -5.85823364 | 56474   | -6.18771693 | empty        |     |              |                                                        |
| 2052 N24 | P | 84087  | 84600  | 131.827098  | 109018 | 109960 | 234.260116  | 2967737 | -0.84493845 | 3272290 | -0.81106933 | empty        |     |              |                                                        |
| 2052 O01 | N | 1073   | 1080   | -0.33975482 | 1234   | 1240   | 0.13534544  | 3150070 | -0.53092497 | 3245807 | -0.85534728 | empty        |     |              |                                                        |
| 2052 O02 | E | 74     | 80     | -1.93026588 | 33     | 40     | -2.47333666 | 57906   | -5.85624278 | 58720   | -6.18396176 | empty        |     |              |                                                        |
| 2052 O03 | X | 627    | 640    | -1.04983283 | 947    | 960    | -0.48797706 | 3234984 | -0.38468627 | 3712370 | -0.07528249 | experimental | NIH | SAM001246865 | Brucine                                                |
| 2052 O04 | E | 66     | 80     | -1.99076588 | 67     | 80     | -2.3886222  | 52342   | -5.8582222  | 56422   | -6.18744612 | empty        |     |              |                                                        |
| 2052 O05 | X | 588    | 600    | -1.11192485 | 1593   | 1600   | 0.91524209  | 2931782 | -0.90686007 | 3496302 | -0.43653497 | experimental | NIH | SAM001246892 | Rolitetraycline                                        |
| 2052 O06 | E | 75     | 80     | -1.92867378 | 112    | 120    | -2.30173556 | 55843   | -5.85979568 | 53557   | -6.19259398 | empty        |     |              |                                                        |
| 2052 O07 | X | 1069   | 1080   | -0.34612323 | 951    | 960    | -0.4792884  | 2993529 | -0.80051953 | 3724981 | -0.05419767 | experimental | NIH | SAM001246887 | Oxyphenonium Bromide                                   |
| 2052 O08 | X | 112    | 120    | -1.86976596 | 94     | 80     | -2.38427786 | 54004   | -5.8629628  | 54497   | -6.19102235 | empty        |     |              |                                                        |
| 2052 O09 | E | 1269   | 1280   | -0.0277026  | 712    | 920    | -0.56400287 | 3491951 | 0.05786171  | 3763365 | 0.00997803  | experimental | NIH | SAM001246856 | Enrofloxacin                                           |
| 2052 O10 | E | 33     | 40     | -1.99554211 | 73     | 80     | -2.38645003 | 51791   | -5.86677402 | 55867   | -6.1887318  | empty        |     |              |                                                        |
| 2052 O11 | X | 920    | 920    | -0.5960343  | 1234   | 1240   | 0.13534544  | 3646340 | 0.32179449  | 3127495 | -1.05315771 | experimental | NIH | SAM001246984 | Ketotifen Fumarate                                     |
| 2052 O12 | E | 73     | 80     | -1.93185798 | 33     | 40     | -2.47333666 | 56362   | -5.85890186 | 57185   | -6.18652818 | empty        |     |              |                                                        |
| 2052 O13 | X | 1114   | 1120   | -0.27447859 | 1074   | 1080   | -0.212112   | 3010401 | -0.77146261 | 3222865 | -0.8937049  | experimental | NIH | SAM001247094 | Rimazole                                               |
| 2052 O14 | E | 112    | 120    | -1.86976596 | 113    | 120    | -2.29956339 | 57206   | -5.85744832 | 56533   | -6.18761829 | empty        |     |              |                                                        |
| 2052 O15 | X | 1433   | 1440   | 0.23340232  | 1274   | 1280   | 0.22232118  | 3237906 | -0.37965401 | 3495847 | -0.4372957  | experimental | NIH | SAM001247083 | Benzo[a]phenanthridine-10,11-diol, 5,6,6a,7,8,12b-hex- |
| 2052 O16 | E | 110    | 120    | -1.87295017 | 29     | 40     | -2.48202533 | 63115   | -5.84727185 | 55064   | -6.19007436 | empty        |     |              |                                                        |
| 2052 O17 | X | 1875   | 1880   | 0.93711192  | 2194   | 2200   | 2.22071377  | 2718243 | -1.27461645 | 2710691 | -1.75002849 | experimental | NIH | SAM001246846 | Dactinomycin                                           |
| 2052 O18 | E | 73     | 80     | -1.93345009 | 113    | 120    | -2.30679989 | 55578   | -5.85852986 | 55699   | -6.18736582 | empty        |     |              |                                                        |
| 2052 O19 | X | 873    | 880    | -0.65817545 | 2184   | 920    | -0.55965854 | 2850976 | -1.04085298 | 3409983 | -0.58085055 | experimental | NIH | SAM001246803 | Itavastatin Ca                                         |
| 2052 O20 | E | 112    | 120    | -1.86976596 | 153    | 160    | -2.21267676 | 56578   | -5.85852986 | 56415   | -6.18781558 | empty        |     |              |                                                        |
| 2052 O21 | X | 1592   | 1600   | 0.48654673  | 1354   | 1360   | 0.39609445  | 2920089 | -0.92699773 | 3438388 | -0.53336363 | experimental | NIH | SAM001246861 | Nialamide                                              |
| 2052 O22 | E | 192    | 200    | -1.74239771 | 151    | 160    | -2.21072109 | 58874   | -5.8545757  | 56851   | -6.18708661 | empty        |     |              |                                                        |
| 2052 O23 | E | 388    | 640    | -1.43034549 | 636    | 1240   | -1.16352065 | 63244   | -5.84704969 | 56448   | -6.1877604  | empty        |     |              |                                                        |
| 2052 O24 | P | 84591  | 85240  | 132.629518  | 205726 | 206560 | 444.325977  | 3051453 | -0.70076294 | 3512478 | -0.40948968 | empty        |     |              |                                                        |
| 2052 P01 | N | 1477   | 1480   | 0.30345486  | 996    | 1000   | -0.38154093 | 3330793 | -0.21968423 | 3048657 | -1.18497002 | empty        |     |              |                                                        |
| 2052 P02 | E | 66     | 80     | -1.94300271 | 67     | 80     | -2.39483302 | 53604   | -5.86365168 | 55022   | -6.19014459 | empty        |     |              |                                                        |
| 2052 P03 | X | 3198   | 3200   | 0.30434644  | 3277   | 3280   | 4.57316941  | 2924734 | -0.91899812 | 2913611 | -1.41075867 | experimental | NIH | SAM001246619 | Rabeprazole                                            |
| 2052 P04 | E | 103    | 120    | -1.88409489 | 107    | 120    | -2.31259639 | 53358   | -5.86407534 | 53768   | -6.1922412  | empty        |     |              |                                                        |
| 2052 P05 | X | 2558   | 2560   | 0.02451839  | 1235   | 1240   | 0.13760671  | 3604704 | 0.25204467  | 3494011 | -0.44036538 | experimental | NIH | SAM001247105 | Sibutramine                                            |
| 2052 P06 | E | 68     | 80     | -1.9398185  | 111    | 120    | -2.30390773 | 52856   | -5.86493988 | 52188   | -6.19488286 | empty        |     |              |                                                        |
| 2052 P07 | X | 1556   | 1560   | 0.42923101  | 1757   | 1760   | 1.27147729  | 3623555 | 0.28450982  | 3307613 | -0.75201143 | experimental | NIH | SAM001246644 | Mevastatin                                             |
| 2052 P08 | E | 110    | 120    | -1.87295017 | 71     | 80     | -2.39079436 | 55179   | -5.86093922 | 53493   | -6.19270098 | empty        |     |              |                                                        |
| 2052 P09 | X | 1876   | 1880   | 0.93870403  | 1197   | 1200   | 0.0550644   | 2932393 | -0.90580781 | 3127495 | -1.05315771 | experimental | NIH | SAM001247066 | Flutamide                                              |
| 2052 P10 | E | 110    | 120    | -1.87295017 | 33     | 40     | -2.47333666 | 53397   | -5.86400817 | 54593   | -6.19086185 | empty        |     |              |                                                        |
| 2052 P11 | X | 1517   | 1520   | 0.36713899  | 996    | 1000   | -0.38154093 | 3358613 | -0.17177269 | 3395845 | -0.60449292 | experimental | NIH | SAM001246922 | Dehydroepiandrosterone                                 |
| 2052 P12 | E | 112    | 120    | -1.86976596 | 75     | 80     | -2.3821057  | 53161   | -5.86441461 | 54223   | -6.19148047 | empty        |     |              |                                                        |
| 2052 P13 | E | 1276   | 1280   | -0.01655787 | 636    | 640    | -1.16352065 | 3335463 | -0.21164157 | 3812917 | 0.09282594  | empty        |     |              |                                                        |
| 2052 P14 | E | 33     | 40     | -1.99554211 | 74     | 80     | -2.38427786 | 54021   | -5.86293352 | 53327   | -6.19297852 | empty        |     |              |                                                        |
| 2052 P15 | E | 1155   | 1160   | -0.20920236 | 1196   | 1200   | 0.05289224  | 3040233 | -0.720086   | 3334438 | -0.70716167 | empty        |     |              |                                                        |
| 2052 P16 | E | 114    | 120    | -1.86658175 | 74     | 80     | -2.38427786 | 56893   | -5.85796737 | 56893   | -6.18698964 | empty        |     |              |                                                        |
| 2052 P17 | E | 794    | 800    | -0.78319516 | 913    | 920    | -0.5163077  | 3117998 | -0.53851593 | 3918984 | 0.27016348  | empty        |     |              |                                                        |
| 2052 P18 | E | 74     | 80     | -1.93026588 | 74     | 80     | -2.38427786 | 55858   | -5.85976984 | 55238   | -6.18978345 | empty        |     |              |                                                        |
| 2052 P19 | E | 1037   | 1040   | -0.39707053 | 957    | 960    | -0.4662554  | 3114946 | -0.59141544 | 3268012 | -0.81822188 | empty        |     |              |                                                        |
| 2052 P20 | E | 113    | 120    | -1.86817386 | 154    | 160    | -2.21050459 | 57631   | -5.85671639 | 56056   | -6.1884158  | empty        |     |              |                                                        |
| 2052 P21 | E | 1115   | 1120   | -0.27288648 | 835    | 840    | -0.73125964 | 2834694 | -1.0740648  | 3259219 | -0.83292324 | empty        |     |              |                                                        |
| 2052 P22 | E | 153    | 160    | -1.80448973 | 194    | 200    | -2.12361796 | 57960   | -5.85614978 | 58644   | -6.18408882 | empty        |     |              |                                                        |
| 2052 P23 | E | 596    | 1000   | -1.09918803 | 644    | 1160   | -1.14614332 | 57320   | -5.85725199 | 57564   | -6.18589452 | empty        |     |              |                                                        |
| 2052 P24 | N | 138930 | 138880 |             |        |        |             |         |             |         |             |              |     |              |                                                        |

|          |   |       |       |             |        |        |             |          |             |          |             |        |        |                            |
|----------|---|-------|-------|-------------|--------|--------|-------------|----------|-------------|----------|-------------|--------|--------|----------------------------|
| 2089 A13 | X | 435   | 440   | -0.21540474 | 274    | 280    | -0.89381533 | 2000584  | -0.51619652 | 2401982  | 0.86918354  | BIOMOL | A-240  | Lincomycin                 |
| 2089 A14 | X | 477   | 480   | -0.08139498 | 397    | 400    | -0.4296819  | 1908622  | -0.85082197 | 2281224  | 0.39998295  | BIOMOL | AC-734 | Acetylcholine Cl           |
| 2089 A15 | X | 356   | 360   | -0.46747073 | 437    | 440    | -0.2787442  | 1984197  | -0.57582449 | 1963006  | -0.83644091 | BIOMOL | A245   | Lomofungin                 |
| 2089 A16 | X | 315   | 320   | -0.59828978 | 354    | 360    | -0.59193993 | 1847644  | -1.07270482 | 2047103  | -0.50965623 | BIOMOL | AC-735 | Atropine sulfate           |
| 2089 A17 | X | 917   | 920   | -1.32516883 | 835    | 840    | 1.22308592  | 19687242 | 1.96202422  | 1523866  | 1.35349908  | BIOMOL | A-249  | Mycophenolic acid          |
| 2089 A18 | X | 355   | 360   | -0.47066143 | 555    | 560    | 0.16652202  | 1901955  | -0.87508143 | 2265565  | 0.33914051  | BIOMOL | AC-737 | Decamethonium 2Br          |
| 2089 A19 | X | 395   | 400   | -0.34033309 | 394    | 400    | -0.44100223 | 1903379  | -0.86989987 | 2111548  | -0.25928665 | BIOMOL | A-256  | Novobincin B               |
| 2089 A20 | X | 316   | 320   | -0.59509907 | 596    | 600    | 0.32123316  | 2882088  | 2.6913639   | 12172006 | -0.02437941 | BIOMOL | AC-741 | Mecamylamine HCl           |
| 2089 A21 | X | 476   | 480   | -0.08458569 | 394    | 400    | -0.44100223 | 1634583  | -1.84797757 | 2083010  | -0.37016996 | BIOMOL | A-275  | Rapamycin                  |
| 2089 A22 | X | 636   | 640   | 0.4259277   | 1156   | 1160   | 2.43436097  | 1705428  | -1.59019131 | 1964164  | -0.83194154 | BIOMOL | AC-743 | Neostigmine Br             |
| 2089 A23 | E | 464   | 680   | -0.12287419 | 377    | 680    | -0.50515075 | 89642    | -7.46961015 | 92477    | -8.10430973 | empty  |        |                            |
| 2089 A24 | X | 72928 | 73160 | 231.086366  | 102251 | 102560 | 383.910532  | 1661580  | -1.74974261 | 1692466  | -1.88807997 | empty  |        |                            |
| 2089 B01 | N | 635   | 640   | 0.42273699  | 278    | 280    | -0.87872156 | 1504397  | -2.32169007 | 1885156  | -1.1389241  | empty  |        |                            |
| 2089 B02 | E | 77    | 80    | -1.35767844 | 78     | 80     | -1.63341006 | 93376    | -7.45602311 | 95422    | -8.09286704 | empty  |        |                            |
| 2089 B03 | X | 434   | 440   | -0.21859545 | 277    | 280    | -0.882495   | 1920465  | -0.80772842 | 2150914  | -0.10633157 | BIOMOL | AR-103 | Tizanidine HCl             |
| 2089 B04 | X | 274   | 280   | -0.72910884 | 316    | 320    | -0.73533074 | 1945616  | -0.71621057 | 2427753  | 0.96931577  | BIOMOL | EI-217 | Tranlylcypromine           |
| 2089 B05 | X | 315   | 320   | -0.59828978 | 515    | 320    | -0.73910418 | 1940080  | -0.73635461 | 2151811  | -0.10284631 | BIOMOL | DL-549 | Meglumine                  |
| 2089 B06 | X | 314   | 320   | -0.60148049 | 395    | 400    | -0.43722878 | 2035329  | -0.38976884 | 2369091  | 0.74138682  | BIOMOL | EI-219 | Proxicam                   |
| 2089 B07 | X | 594   | 600   | 0.25191793  | 636    | 640    | 0.47217085  | 2125494  | -0.061682   | 2100797  | -0.30105925 | BIOMOL | AR-107 | Propranolol HCl s(-)       |
| 2089 B08 | X | 275   | 280   | -0.72591813 | 274    | 280    | -0.89381533 | 1850198  | -1.06341149 | 2107771  | -0.27396204 | BIOMOL | EI-240 | Desprenyl HCl r (-)        |
| 2089 B09 | X | 355   | 360   | -0.47066143 | 395    | 400    | -0.43722878 | 1833673  | -1.1235416  | 1935161  | -0.94463159 | BIOMOL | AR-112 | Carvedilol                 |
| 2089 B10 | X | 435   | 440   | -0.21540474 | 394    | 400    | -0.44100223 | 2040522  | -0.37087268 | 2109129  | -0.26868558 | BIOMOL | EI-249 | Troleanodolmycin           |
| 2089 B11 | X | 393   | 400   | -0.3494145  | 595    | 600    | 0.31745972  | 1707018  | -1.58440572 | 1892439  | -1.11062628 | BIOMOL | DL-223 | Cervastatin                |
| 2089 B12 | X | 474   | 480   | -0.0909671  | 272    | 280    | -0.90136221 | 2013211  | -0.4702502  | 1975541  | -0.78773664 | BIOMOL | EI-265 | Acaridazole                |
| 2089 B13 | X | 795   | 800   | 0.93235037  | 1356   | 1360   | 3.18904947  | 1534026  | -2.21387796 | 1620735  | -2.16632177 | BIOMOL | AW8655 | Carlubacin                 |
| 2089 B14 | X | 400   | 400   | 0.74622338  | 375    | 400    | 0.29761147  | 204935   | -0.50936438 | 2104937  | -0.06703789 | BIOMOL | EI-287 | Kitesulide                 |
| 2089 B15 | X | 435   | 440   | -0.21540474 | 394    | 400    | -0.44100223 | 1961835  | -0.65719394 | 2048386  | -0.50470018 | BIOMOL | B-100  | Flumazenil                 |
| 2089 B16 | X | 395   | 400   | -0.34033309 | 714    | 720    | 0.76649938  | 1966617  | -0.63979347 | 2023091  | -0.60298294 | BIOMOL | EI-288 | Ketoprofen                 |
| 2089 B17 | X | 313   | 320   | -0.6046712  | 672    | 680    | 0.60801479  | 1690923  | -1.64297118 | 1642006  | -2.08367412 | BIOMOL | GR-103 | Fenretinide                |
| 2089 B18 | X | 514   | 520   | 0.03666124  | 513    | 520    | 0.00803743  | 1896556  | -0.89472696 | 2055718  | -0.47621198 | BIOMOL | EI-292 | Meloxicam                  |
| 2089 B19 | X | 955   | 960   | 1.44376376  | 954    | 960    | 1.67212558  | 1776117  | -1.3329727  | 1849683  | -1.27675308 | BIOMOL | DL-269 | Gefitinib                  |
| 2089 B20 | X | 354   | 360   | -0.47385214 | 513    | 520    | 0.00803743  | 1903868  | -0.86812052 | 2414252  | 0.91685815  | BIOMOL | EI-318 | Terbinafine HCl            |
| 2089 B21 | X | 515   | 520   | 0.03981595  | 474    | 480    | -0.13912683 | 1863066  | -1.01658823 | 2050235  | -0.49751597 | BIOMOL | DL-270 | Ibudilast                  |
| 2089 B22 | X | 400   | 400   | 0.60406723  | 391    | 400    | 0.65232255  | 2063086  | -0.88978412 | 2011997  | -0.58479525 | BIOMOL | EI320  | Sodium phenylbutyrate      |
| 2089 B23 | E | 406   | 640   | -0.30793529 | 648    | 960    | 0.51745217  | 94322    | -7.45258086 | 98888    | -8.07940003 | empty  |        |                            |
| 2089 B24 | P | 78879 | 79280 | 250.076545  | 105222 | 105880 | 395.121429  | 1805777  | -1.22504779 | 1847039  | -1.28702625 | empty  |        |                            |
| 2089 C01 | N | 637   | 640   | 0.42911841  | 278    | 280    | -0.87872156 | 2284054  | 0.515276    | 1806197  | -1.44571627 | empty  |        |                            |
| 2089 C02 | E | 74    | 80    | -1.36725057 | 118    | 120    | -1.48247236 | 93806    | -7.45445845 | 97123    | -8.08625787 | empty  |        |                            |
| 2089 C03 | X | 1116  | 1120  | 1.95746785  | 317    | 320    | -0.7315573  | 2288859  | 0.53276012  | 2303989  | 0.48843549  | BIOMOL | A-280  | Spectinomycin              |
| 2089 C04 | X | 633   | 640   | 0.41635557  | 316    | 320    | -0.73533074 | 1979001  | -0.59473196 | 2332614  | 0.59965683  | BIOMOL | AC-745 | Strychnine HCl             |
| 2089 C05 | X | 674   | 680   | 0.74635214  | 475    | 480    | 0.54717463  | 2097755  | -0.1626169  | 2141338  | -0.27456445 | BIOMOL | AC-746 | Copaxone                   |
| 2089 C06 | X | 434   | 440   | -0.21859545 | 515    | 520    | 0.01559432  | 2191457  | 0.01559432  | 2202266  | 0.09319466  | BIOMOL | AC-746 | Tubocurarine Cl (+)        |
| 2089 C07 | X | 874   | 880   | 1.18531636  | 313    | 320    | -0.74665107 | 1977118  | -0.6015831  | 2168315  | -0.03872065 | BIOMOL | AC-105 | Amiodarone                 |
| 2089 C08 | X | 474   | 480   | -0.0909671  | 476    | 480    | -0.13157994 | 1983348  | -0.57891378 | 1938973  | -0.92982021 | BIOMOL | AC-747 | Butaclamol (+)             |
| 2089 C09 | X | 315   | 320   | -0.59828978 | 435    | 440    | -0.28629108 | 1960564  | -0.66181874 | 2035621  | -0.5542981  | BIOMOL | AC-108 | Nicaridine                 |
| 2089 C10 | X | 514   | 520   | 0.03666124  | 475    | 480    | -0.13535338 | 1930266  | -0.77206517 | 1862475  | -1.22705026 | BIOMOL | AC-748 | Apomorphine r (-)          |
| 2089 C11 | X | 995   | 1000  | 1.57139211  | 435    | 440    | -0.28629108 | 2005908  | -0.49682389 | 1976346  | -0.78460885 | BIOMOL | AC-109 | Pimozide                   |
| 2089 C12 | X | 474   | 480   | -0.0909671  | 395    | 400    | -0.8626844  | 1978928  | -0.59496999 | 2458008  | -0.03983579 | BIOMOL | AC-749 | Chlorpromazine HCl         |
| 2089 C13 | X | 314   | 320   | -0.60148049 | 493    | 400    | -0.44477567 | 2062088  | -0.29240334 | 1896277  | -0.09573717 | BIOMOL | AC-110 | Loperamide                 |
| 2089 C14 | X | 475   | 480   | -0.0877664  | 475    | 480    | -0.13535338 | 2026029  | -0.42360888 | 1956133  | -0.86314568 | BIOMOL | AC-751 | Domperidone                |
| 2089 C15 | X | 595   | 600   | 0.29510864  | 514    | 520    | 0.01181088  | 1918942  | -0.81327022 | 1946919  | -0.89894633 | BIOMOL | AC-116 | Fusipirine                 |
| 2089 C16 | X | 674   | 680   | 0.54717463  | 594    | 600    | 0.91743708  | 1938168  | -0.74331188 | 1947121  | -0.89816147 | BIOMOL | AC-753 | Fluphenazine 2HCl          |
| 2089 C17 | X | 595   | 600   | 0.31368628  | 754    | 600    | 0.31368628  | 2042117  | -0.3650689  | 2168326  | -0.03867791 | BIOMOL | AC-117 | Tolbutamide                |
| 2089 C18 | X | 394   | 400   | -0.3462238  | 394    | 360    | -0.59193993 | 1902579  | -0.87281085 | 1933466  | -0.95121745 | BIOMOL | AC-755 | Pergolide mesylate         |
| 2089 C19 | X | 554   | 560   | 0.16428959  | 674    | 680    | 0.61556168  | 1989326  | -0.55716141 | 2143018  | -0.13701117 | BIOMOL | AC-118 | Pimozidil                  |
| 2089 C20 | X | 434   | 440   | -0.21859545 | 474    | 480    | -0.15044715 | 1963112  | -0.65254724 | 2011508  | -0.64798824 | BIOMOL | AC-757 | Raclopride l-tartrate s(-) |
| 2089 C21 | X | 514   | 520   | 0.03666124  | 714    | 720    | 0.76649938  | 2020338  | -0.44431693 | 2161985  | -0.06331562 | BIOMOL | AC-120 | Glipizide                  |
| 2089 C22 | X | 595   | 600   | 0.29510864  | 433    | 440    | -0.29383797 | 1931347  | -0.76813169 | 1979912  | -0.77075329 | BIOMOL | AC-758 | Risperidone                |
| 2089 C23 | E | 328   | 520   | -0.55681057 | 396    | 760    | -0.43345534 | 98793    | -7.43631208 | 99567    | -8.07676118 | empty  |        |                            |
| 2089 C24 | P | 64154 | 64560 | 203.09336   | 123082 | 123680 | 462.515113  | 2010621  | -0.47967453 | 2076699  | -0.39469111 | empty  |        |                            |
| 2089 D01 | N | 316   | 320   | -0.59509907 | 278    | 280    | -0.87872156 | 2212745  | 0.25580136  | 2379167  | 0.78053673  | empty  |        |                            |
| 2089 D02 | E | 78    | 80    | -1.35448773 | 118    | 120    | -1.48247236 | 94784    | -7.45089977 | 97048    | -8.08654928 | empty  |        |                            |
| 2089 D03 | X | 354   | 360   | -0.47385214 | 317    | 320    | -0.7315573  | 1876902  | -0.96624268 | 2114492  | -0.24784785 | BIOMOL | DL-271 | Imatinib                   |
| 2089 D04 | X | 475   | 480   | -0.09415781 | 235    | 240    | -1.04097959 | 2217124  | 0.27173539  | 2636756  | 1.78138893  | BIOMOL | FR-111 | Ergothioneine              |
| 2089 D05 | X | 795   | 800   | 0.93235037  | 635    | 640    | 0.46839742  | 1565674  | -2.09871924 | 1703579  | -1.84443458 | BIOMOL | DL-548 | Idarubicin                 |
| 2089 D06 | X | 352   | 360   | -0.48023356 | 554    | 560    | 0.16274858  | 2456802  | 1.14386038  | 2373092  | 2.31111723  | BIOMOL | FR-112 | Ambroxol                   |
| 2089 D07 | X | 593   | 600   | 0.28872723  | 715    | 720    | 0.77027282  | 2066434  | -0.27658575 | 2345773  | 0.65078562  | BIOMOL | DL-273 | Montelukast                |
| 2089 D08 | X | 554   | 560   | 0.16428959  | 394    | 400    | -0.44100223 | 2264034  | 0.4424285   | 2803136  | 2.42785205  | BIOMOL | FR114  | Idebeneone                 |
| 2089 D09 | X | 474   | 480   | -0.0909671  | 395    | 400    | -0.43722878 | 2059571  | -0.3015584  | 2305536  | 0.4944463   | BIOMOL | EI-240 | Selegiline                 |
| 2089 D10 | X | 475   | 480   | -0.0877664  | 394    | 400    | -0.44100223 | 2285258  | 0.53057324  | 2321926  | 0.55812901  | BIOMOL | G-233  | Mevastatin                 |
| 2089 D11 | X | 354   | 360   | -0.47385214 | 356    | 360    | -0.58439251 | 2073828  | -0.2468094  | 1997088  | -0.09416166 | BIOMOL | DL-275 | Vatalanid                  |
| 2089 D12 | X | 194   | 200   | -0.98436553 | 197    | 200    | -1.1843704  | 2399973  | 0.93707465  | 2384168  | 0.79996792  | BIOMOL | G-244  | Simvastatin                |
| 2089 D13 | X | 397   | 400   | -0.33665167 | 276    | 280    | -0.88626844 | 1996181  | -0.53221788 | 2138011  | -0.15646568 | BIOMOL | CT-100 | Fumagillone                |
| 2089 D14 | X | 435   | 440   | -0.21540474 | 435    | 440    | -0.28629108 | 2099959  | -0.15459712 | 2750220  | 2.22224895  | BIOMOL | G-430  | Suramin sodium             |
| 2089 D15 | X | 275   | 280   | -0.72591813 | 435    | 440    | -0.28629108 | 2123776  | -0.06793335 | 2157482  | -0.08081185 | BIOMOL | DL-239 | Efaroxan                   |
| 2089 D16 | X | 355   | 360   | -0.47066143 | 355    | 360    | -0.58816648 | 2159793  | 0.06312301  | 2498339  | 1.24357497  | BIOMOL | DL-282 | Gos                        |

|          |   |  |       |       |             |        |        |             |         |             |         |             |              |        |        |                                   |
|----------|---|--|-------|-------|-------------|--------|--------|-------------|---------|-------------|---------|-------------|--------------|--------|--------|-----------------------------------|
| 2089 E07 | X |  | 554   | 560   | 0.16428959  | 475    | 480    | -0.13535338 | 2202031 | 0.21681595  | 2106603 | -0.27850026 | experimental | BIOMOL | AC-123 | Flufenamic acid                   |
| 2089 E08 | X |  | 354   | 360   | -0.47385214 | 395    | 400    | -0.43722878 | 1909638 | -0.84712502 | 1780112 | -1.54706854 | experimental | BIOMOL | AC-765 | Promethazine HCl                  |
| 2089 E09 | X |  | 715   | 720   | 0.67799368  | 434    | 440    | -0.29006453 | 2037491 | -0.38190169 | 2156308 | -0.08537339 | experimental | BIOMOL | AC-124 | Propafenone                       |
| 2089 E10 | X |  | 514   | 520   | 0.03665124  | 675    | 680    | 0.61935514  | 2139865 | -0.00838972 | 2077871 | -0.39013735 | experimental | BIOMOL | AC-766 | Ranitidine HCl                    |
| 2089 E11 | X |  | 475   | 480   | -0.28629108 | 435    | 440    | -0.28629108 | 2100229 | -0.15338904 | 2100529 | -0.30210055 | experimental | BIOMOL | AC-125 | Naltrindole HCl                   |
| 2089 E12 | X |  | 677   | 680   | 0.55674675  | 195    | 200    | -1.19191729 | 1933891 | -0.75887475 | 1934777 | -0.94612361 | experimental | BIOMOL | AC-770 | Naltrindole HCl                   |
| 2089 E13 | X |  | 195   | 200   | -0.98117482 | 476    | 480    | -0.13157994 | 2114429 | -0.10194461 | 2268397 | 0.35014413  | experimental | BIOMOL | AC-127 | Procainamide                      |
| 2089 E14 | X |  | 395   | 400   | -0.34303309 | 435    | 440    | -0.28629108 | 2058735 | -0.30460038 | 2057893 | -0.4677611  | experimental | BIOMOL | AC-806 | Idazoxan                          |
| 2089 E15 | X |  | 476   | 480   | -0.08458569 | 355    | 360    | -0.58816648 | 2284689 | 0.51758659  | 2427861 | 0.9697354   | experimental | BIOMOL | AC-128 | Lidocaine                         |
| 2089 E16 | X |  | 393   | 400   | -0.3494145  | 354    | 360    | -0.59193993 | 2016067 | -0.45985797 | 1756436 | -1.63906073 | experimental | BIOMOL | AC-807 | Sipiperone                        |
| 2089 E17 | X |  | 435   | 440   | -0.21540474 | 714    | 720    | 0.76649938  | 2443861 | 1.0967715   | 2274186 | 0.37263707  | experimental | BIOMOL | AC-130 | Flecainide                        |
| 2089 E18 | X |  | 394   | 400   | -0.3462238  | 594    | 600    | 0.31368628  | 2154612 | 0.04427072  | 2078755 | -0.39762075 | experimental | BIOMOL | AC-808 | Epinephrine-(+)-tartrate l (-)    |
| 2089 E19 | X |  | 1075  | 1080  | 1.8266488   | 915    | 920    | 1.52496132  | 2245112 | 0.37357634  | 2264114 | 0.3335207   | experimental | BIOMOL | AC-131 | Phenamil                          |
| 2089 E20 | X |  | 473   | 480   | -0.09415781 | 351    | 360    | -0.60326025 | 2271606 | 0.46998101  | 2140590 | -0.14644507 | experimental | BIOMOL | AC-809 | Xylazine HCl                      |
| 2089 E21 | X |  | 554   | 560   | 0.16428959  | 714    | 720    | 0.76649938  | 2528336 | 1.40415373  | 2405906 | 0.88443009  | experimental | BIOMOL | AC-136 | Cirazoline HCl                    |
| 2089 E22 | X |  | 512   | 520   | 0.03027983  | 471    | 480    | -0.15044715 | 2182353 | 0.1452129   | 2116109 | -0.24156506 | experimental | BIOMOL | AC-810 | Norepinephrine-(+)-tartrate l (-) |
| 2089 E23 | E |  | 285   | 480   | -0.69401104 | 290    | 520    | -0.83344025 | 96820   | -7.4434913  | 97832   | -0.08350308 | empty        |        |        |                                   |
| 2089 E24 | P |  | 65516 | 65920 | 207.439105  | 77108  | 77640  | 289.034867  | 2305490 | 0.59327594  | 2459615 | 1.09311435  | empty        |        |        |                                   |
| 2089 F01 | N |  | 435   | 440   | -0.21540474 | 438    | 440    | -0.27497076 | 2210924 | 0.24917523  | 2074889 | -0.40172379 | empty        |        |        |                                   |
| 2089 F02 | E |  | 77    | 80    | -1.35767844 | 78     | 80     | -1.63341006 | 90962   | -7.46480702 | 93310   | -8.10107314 | empty        |        |        |                                   |
| 2089 F03 | X |  | 355   | 360   | -0.47066143 | 196    | 200    | -1.18814384 | 1963645 | -0.65067078 | 1909206 | -1.04547875 | experimental | BIOMOL | DL-278 | Dofetilide                        |
| 2089 F04 | X |  | 354   | 360   | -0.47385214 | 436    | 440    | -0.28251764 | 2258739 | 0.42316139  | 2316249 | 0.53607125  | experimental | BIOMOL | GR-211 | Bezafibrate                       |
| 2089 F05 | X |  | 474   | 480   | -0.0909671  | 434    | 440    | -0.29006453 | 2054771 | -0.31902433 | 1865937 | -1.21359879 | experimental | BIOMOL | DL-279 | Erolotinib                        |
| 2089 F06 | X |  | 514   | 520   | 0.03666124  | 395    | 400    | -0.43722878 | 1823657 | -1.15998718 | 1849091 | -1.27905328 | experimental | BIOMOL | GR243  | Raloxifene HCl                    |
| 2089 F07 | X |  | 434   | 440   | -0.21859545 | 395    | 400    | -0.43722878 | 2332180 | 0.69039381  | 2056359 | -0.47372124 | experimental | BIOMOL | AC-227 | Lobeline                          |
| 2089 F08 | X |  | 394   | 400   | -0.3462238  | 594    | 600    | 0.31368628  | 2154612 | 0.04427072  | 2078755 | -0.39762075 | experimental | BIOMOL | AC-301 | Amptopothecin                     |
| 2089 F09 | X |  | 394   | 400   | -0.3462238  | 435    | 440    | -0.28629108 | 2065795 | -0.2789109  | 1957355 | -0.85839765 | experimental | BIOMOL | NS-520 | Melatonin                         |
| 2089 F10 | X |  | 515   | 520   | 0.03985195  | 434    | 440    | -0.29006453 | 1837167 | -1.11082786 | 1743120 | -1.69079954 | experimental | BIOMOL | GR-305 | Plicamycin                        |
| 2089 F11 | X |  | 275   | 280   | -0.72591813 | 395    | 400    | -0.43722878 | 2297389 | 0.56379854  | 2085250 | -0.36146652 | experimental | BIOMOL | PG-008 | Dinoprost                         |
| 2089 F12 | X |  | 275   | 280   | -0.72591813 | 394    | 440    | -0.28251764 | 2127557 | -0.05417529 | 2094943 | -0.32380474 | experimental | BIOMOL | GR-306 | Rifampicin                        |
| 2089 F13 | X |  | 236   | 240   | -0.85035576 | 435    | 440    | -0.28629108 | 2107184 | -0.12830726 | 2000862 | -0.68935287 | experimental | BIOMOL | EI-233 | Fasudil                           |
| 2089 F14 | X |  | 475   | 480   | -0.0877764  | 595    | 600    | 0.31745972  | 2324471 | 0.66234279  | 2075498 | -0.39935755 | experimental | BIOMOL | GR-307 | Etosipide                         |
| 2089 F15 | X |  | 433   | 440   | -0.22178616 | 474    | 480    | -0.13912683 | 2173254 | 0.11210404  | 2039107 | -0.54075338 | experimental | BIOMOL | C-106  | Hydroxytacrine maleate            |
| 2089 F23 | E |  | 440   | 440   | -0.94607702 | 82582  | 83120  | -0.01460322 | 9394861 | 7.45630329  | 2108888 | -0.26962198 | empty        |        |        |                                   |
| 2089 F24 | P |  | 78015 | 78440 | 247.319773  | 82582  | 83120  | 309.690691  | 1847173 | 0.0741867   | 1810999 | -1.42750822 | empty        |        |        |                                   |
| 2089 G01 | N |  | 878   | 880   | 1.19807919  | 398    | 400    | -0.42590846 | 2244594 | 0.37169147  | 1926530 | -0.97816701 | empty        |        |        |                                   |
| 2089 G02 | E |  | 35    | 40    | -1.4916882  | 37     | 40     | -1.7881212  | 92759   | -7.45826821 | 96516   | -0.08861635 | empty        |        |        |                                   |
| 2089 G03 | X |  | 716   | 720   | 0.68118439  | 397    | 400    | -0.4296819  | 2231625 | 0.3245007   | 2285920 | 0.41822908  | experimental | BIOMOL | AC-138 | Oxymetazoline HCl                 |
| 2089 G04 | X |  | 666   | 680   | 0.52164896  | 390    | 400    | -0.456096   | 2224104 | 0.29713377  | 2256123 | 0.30245398  | experimental | BIOMOL | DL-557 | Quetiapine fumarate               |
| 2089 G05 | X |  | 834   | 840   | 1.05768801  | 555    | 560    | 0.16652202  | 2239342 | 0.35258083  | 2379420 | 0.78151975  | experimental | BIOMOL | AC-142 | Ifenprodil                        |
| 2089 G06 | X |  | 433   | 440   | -0.22178616 | 275    | 280    | -0.72591813 | 2247791 | 0.38332451  | 4030368 | 0.39160509  | experimental | BIOMOL | AC-812 | Alprenolol HCl                    |
| 2089 G07 | X |  | 514   | 520   | 0.03666124  | 275    | 280    | -0.89004209 | 211045  | -0.2852022  | 2155425 | -0.08880245 | experimental | BIOMOL | AC-144 | Naftopidil 2HCl                   |
| 2089 G08 | X |  | 555   | 560   | 0.1674803   | 276    | 280    | -0.88626844 | 2059842 | -0.3005723  | 2083546 | -0.36808735 | experimental | BIOMOL | AC-813 | Imipramine HCl                    |
| 2089 G09 | X |  | 595   | 600   | 0.29510864  | 315    | 320    | -0.73910418 | 2349681 | 0.75407533  | 2195527 | 0.06701054  | experimental | BIOMOL | AC-146 | Prazosin HCl                      |
| 2089 G10 | X |  | 394   | 400   | -0.3462238  | 556    | 560    | 0.17029546  | 1946814 | -0.71185136 | 1975945 | -0.78616692 | experimental | BIOMOL | AC-814 | Amoxapine                         |
| 2089 G11 | X |  | 356   | 360   | -0.46747073 | 315    | 320    | -0.73910418 | 2404123 | 0.9521754   | 2257058 | 0.30608688  | experimental | BIOMOL | AC-152 | Clonidine HCl                     |
| 2089 G12 | X |  | 476   | 480   | -0.08458569 | 475    | 480    | -0.13535338 | 2246525 | 0.37871787  | 2228013 | 0.19323365  | experimental | BIOMOL | AC-834 | Mesulergine HCl                   |
| 2089 G13 | X |  | 435   | 440   | -0.21540474 | 355    | 360    | -0.58816648 | 2069014 | -0.26719781 | 2034069 | -0.56032834 | experimental | BIOMOL | AC-153 | Guanabenz acetate                 |
| 2089 G14 | X |  | 595   | 600   | 0.29510864  | 394    | 400    | -0.44100223 | 2214048 | 0.26054264  | 2108888 | -0.26962198 | experimental | BIOMOL | DL-558 | Amfebutamone                      |
| 2089 G15 | X |  | 594   | 600   | 0.29191793  | 474    | 480    | -0.13912683 | 2171593 | 0.1060601   | 2153413 | -0.0966218  | experimental | BIOMOL | AC-154 | Rilmenidine hemifumarate          |
| 2089 G16 | X |  | 473   | 480   | -0.09415781 | 634    | 640    | 0.46462398  | 2413088 | 0.98479667  | 1983910 | -0.75521921 | experimental | BIOMOL | AC-840 | Metolopramide HCl                 |
| 2089 G17 | X |  | 714   | 720   | 0.67480297  | 633    | 640    | 0.46085053  | 2496307 | 1.28706865  | 2233625 | 0.21503886  | experimental | BIOMOL | AC-160 | Spiroaxtrine                      |
| 2089 G18 | X |  | 434   | 440   | -0.21859545 | 635    | 640    | 0.46839742  | 2126111 | -0.0594369  | 2062084 | -0.45147713 | experimental | BIOMOL | AC-858 | Naltriben mesylate                |
| 2089 G19 | X |  | 515   | 520   | 0.03985195  | 483    | 480    | -0.14290027 | 2233592 | 0.3316581   | 2308962 | 0.50775789  | experimental | BIOMOL | AC-161 | Yohimbine HCl                     |
| 2089 G20 | X |  | 475   | 480   | -0.0877764  | 514    | 520    | 0.01181088  | 2283455 | 0.51309639  | 2135639 | -0.16568199 | experimental | BIOMOL | DL-124 | Vitamin a (acetate)               |
| 2089 G21 | X |  | 394   | 400   | -0.3462238  | 714    | 720    | 0.76649938  | 2102315 | -0.14603426 | 1998035 | -0.70033707 | experimental | BIOMOL | AC-164 | Dihydroergotamine mesylate        |
| 2089 G22 | X |  | 552   | 560   | 0.15790817  | 471    | 480    | -0.15044715 | 2092502 | -0.18173118 | 2046783 | -0.42092858 | experimental | BIOMOL | AC-891 | Levallophan tartrate              |
| 2089 G23 | E |  | 522   | 760   | 0.06218691  | 483    | 800    | -0.10516584 | 96816   | -7.44350586 | 98854   | -8.07953214 | empty        |        |        |                                   |
| 2089 G24 | P |  | 80049 | 80480 | 253.809674  | 107050 | 107640 | 402.019282  | 1983461 | -0.5785026  | 2223417 | 0.17537607  | empty        |        |        |                                   |
| 2089 H01 | N |  | 316   | 320   | -0.59509907 | 317    | 320    | -0.7315573  | 2163266 | 0.07576034  | 2191638 | 0.05189998  | empty        |        |        |                                   |
| 2089 H02 | E |  | 38    | 40    | -1.48211608 | 158    | 160    | -1.33153466 | 93494   | -7.45559374 | 96081   | -0.09030652 | empty        |        |        |                                   |
| 2089 H03 | X |  | 347   | 360   | -0.4961871  | 312    | 320    | -0.75042451 | 2187284 | 0.16315955  | 2284959 | 0.41449515  | experimental | BIOMOL | C-115  | Galanthamine HBr                  |
| 2089 H04 | X |  | 304   | 320   | -0.724706   | 312    | 320    | -0.75042451 | 2187284 | 0.16315955  | 2284959 | 0.41449515  | experimental | BIOMOL | GR-318 | Galantamine HBr                   |
| 2089 H05 | X |  | 414   | 440   | -0.28240962 | 342    | 360    | -0.63721254 | 1714361 | -1.4594061  | 1770791 | -1.58285753 | experimental | BIOMOL | CA-200 | Amiloride                         |
| 2089 H06 | X |  | 4154  | 4160  | 11.6508408  | 3355   | 3360   | 10.7321611  | 1869393 | -0.99356595 | 1839869 | -1.31488501 | experimental | BIOMOL | GR-319 | Doxorubicin HCl                   |
| 2089 H07 | X |  | 423   | 440   | -0.25369325 | 346    | 360    | -0.62212747 | 2347639 | 0.74664503  | 2438048 | 1.0093166   | experimental | BIOMOL | CA-202 | Doxorubicin HCl                   |
| 2089 H08 | X |  | 395   | 400   | -0.34303309 | 436    | 440    | -0.28251764 | 1993501 | -0.54196969 | 2022725 | -0.60440502 | experimental | BIOMOL | GR336  | Amiodipine                        |
| 2089 H09 | X |  | 234   | 240   | -0.85673718 | 335    | 340    | -0.28629108 | 2193956 | 0.18743315  | 2479594 | 1.17074199  | experimental | BIOMOL | CA-205 | Amiodipine                        |
| 2089 H10 | X |  | 476   | 480   | -0.08458569 | 435    | 320    | -0.73910418 | 2272562 | 0.47345964  | 2270187 | 0.35709911  | experimental | BIOMOL | DL-284 | Lapatinib                         |
| 2089 H11 | X |  | 355   | 360   | -0.47066143 | 435    | 440    | -0.28629108 | 2237195 | 0.34476846  | 2089605 | -0.34454534 | experimental | BIOMOL | CA-210 | Nifedipine                        |
| 2089 H12 | X |  | 394   | 400   | -0.3462238  | 594    | 600    | 0.31368628  | 2154612 | 0.04427072  | 2078755 | -0.39762075 | experimental | BIOMOL | DL-285 | Methsallylclyate                  |
| 2089 H13 | X |  | 316   | 320   | -0.59509907 | 354    | 360    | -0.59193993 |         |             |         |             |              |        |        |                                   |

|          |   |       |       |             |        |        |             |         |             |         |             |              |        |          |  |  |                                |
|----------|---|-------|-------|-------------|--------|--------|-------------|---------|-------------|---------|-------------|--------------|--------|----------|--|--|--------------------------------|
| 2089 I01 | N | 598   | 600   | 0.30468077  | 558    | 560    | 0.17784235  | 2644363 | 1.82634536  | 2018402 | -0.62120187 | empty        |        |          |  |  |                                |
| 2089 I02 | E | 116   | 120   | -1.232408   | 471    | 120    | -1.4862458  | 91017   | -7.46460689 | 94518   | -8.0963795  | empty        |        |          |  |  |                                |
| 2089 I03 | X | 716   | 720   | 0.68118439  | 316    | 320    | -0.73532074 | 2403616 | 0.95033056  | 2425226 | 0.95949721  | experimental | BIOMOL | AC-165   |  |  | Nicergoline                    |
| 2089 I04 | X | 505   | 520   | 0.00794486  | 471    | 480    | -0.15044715 | 2565157 | 1.53085816  | 2399267 | 0.84669781  | experimental | BIOMOL | AC-893   |  |  | Sulbutamol HCl                 |
| 2089 I05 | X | 831   | 840   | 0.04811589  | 314    | 480    | -0.13912683 | 2485006 | 2.4648729   | 2403219 | 0.87607533  | experimental | BIOMOL | DL-564   |  |  | Emtricitabine                  |
| 2089 I06 | X | 822   | 840   | 0.10193951  | 385    | 400    | -0.47496321 | 2386973 | 0.88977108  | 2321074 | 0.5548186   | experimental | BIOMOL | AC-911   |  |  | Carbamylcholine Cl             |
| 2089 I07 | X | 754   | 760   | 0.80243132  | 676    | 680    | 0.62310856  | 2330465 | 0.68415338  | 2273968 | 0.37179004  | experimental | BIOMOL | AC-169   |  |  | Betaxolol HCl                  |
| 2089 I08 | X | 475   | 480   | -0.0877764  | 393    | 400    | -0.44477567 | 2421155 | 1.01415035  | 2404847 | 0.88031538  | experimental | BIOMOL | AC-912   |  |  | Carbamyl-beta-methylcholine Cl |
| 2089 I09 | X | 475   | 480   | -0.0877764  | 635    | 640    | 0.46839742  | 2265618 | 0.44819226  | 2266812 | 0.11085797  | experimental | BIOMOL | AC-171   |  |  | Practolol                      |
| 2089 I10 | X | 474   | 480   | -0.0909671  | 434    | 440    | -0.29006453 | 2294409 | 0.55295511  | 2449531 | 1.05393336  | experimental | BIOMOL | AC-915   |  |  | Butyrylcholine                 |
| 2089 I11 | X | 556   | 560   | 0.17067101  | 555    | 560    | 0.16652202  | 2287661 | 0.52840092  | 2372581 | 0.75494708  | experimental | BIOMOL | AC-172   |  |  | Timolol maleate (s)            |
| 2089 I12 | X | 315   | 320   | -0.59828978 | 432    | 440    | -0.29761141 | 2176210 | 0.12286014  | 2321919 | 0.57170093  | experimental | BIOMOL | AC-925   |  |  | Famotidine                     |
| 2089 I13 | X | 355   | 360   | -0.47066143 | 393    | 400    | -0.44477567 | 2116574 | -0.09413952 | 2210980 | 0.12705258  | experimental | BIOMOL | AC-173   |  |  | Xamoterol hemifumarate         |
| 2089 I14 | X | 756   | 760   | 0.80881274  | 434    | 440    | -0.29006453 | 2056754 | -0.31180872 | 2070836 | -0.41747157 | experimental | BIOMOL | AC-928   |  |  | Terfenadine                    |
| 2089 I15 | X | 514   | 520   | 0.03666124  | 474    | 480    | -0.13912683 | 2121172 | -0.07740862 | 2181714 | 0.01334066  | experimental | BIOMOL | AC-174   |  |  | Clenbuterol                    |
| 2089 I16 | X | 674   | 680   | 0.54717463  | 593    | 600    | 0.30991283  | 2298515 | 0.56789576  | 2254469 | 0.29602742  | experimental | BIOMOL | AC-986   |  |  | Isoniazid                      |
| 2089 I17 | X | 914   | 920   | 1.31294471  | 473    | 480    | -0.14290027 | 2349054 | 0.75179384  | 2098053 | -0.31172096 | experimental | BIOMOL | AC-175   |  |  | Procaterol hcl                 |
| 2089 I18 | X | 473   | 480   | -0.09415781 | 594    | 600    | 0.31368628  | 2209083 | 0.24247631  | 2105095 | -0.28435954 | experimental | BIOMOL | AC-993   |  |  | Ticlopidine HCl                |
| 2089 I19 | X | 314   | 320   | -0.60148049 | 592    | 600    | 0.30613939  | 2080090 | -0.22689517 | 2301766 | 0.477939811 | experimental | BIOMOL | AC-176   |  |  | Salbutamol sulfate             |
| 2089 I20 | X | 555   | 560   | 0.1674803   | 1154   | 1160   | 2.42681408  | 2346688 | 0.74318459  | 2417148 | 0.92811045  | experimental | BIOMOL | DL-246   |  |  | Amorolfine                     |
| 2089 I21 | X | 474   | 480   | -0.0909671  | 270    | 280    | -0.9089091  | 2321159 | 0.6502913   | 2051251 | -0.49356834 | experimental | BIOMOL | AC-181   |  |  | Pindolol                       |
| 2089 I22 | X | 514   | 520   | 0.03666124  | 475    | 480    | -0.13535338 | 2059082 | -0.30333774 | 2059958 | -0.45973762 | experimental | BIOMOL | DL-247   |  |  | Clemastine fumarate            |
| 2089 I23 | E | 361   | 560   | -0.45151718 | 431    | 720    | -0.30138485 | 98638   | -7.43687608 | 101357  | -8.06980683 | empty        |        |          |  |  |                                |
| 2089 I24 | P | 66531 | 67000 | 210.677675  | 96983  | 97640  | 364.032037  | 1949895 | -0.70064042 | 2147078 | -0.1212362  | empty        |        |          |  |  |                                |
| 2089 J01 | N | 317   | 320   | -0.59190836 | 277    | 280    | -0.882495   | 2265800 | 0.41530536  | 1952034 | -0.87907219 | empty        |        |          |  |  |                                |
| 2089 J02 | E | 117   | 120   | -1.23005009 | 118    | 120    | -1.48247236 | 92493   | -7.4592361  | 92493   | -8.09458244 | empty        |        |          |  |  |                                |
| 2089 J03 | X | 315   | 320   | -0.59828978 | 317    | 320    | 0.7135573   | 2092023 | 1.18137413  | 1183472 | 0.20201713  | experimental | BIOMOL | CA-234   |  |  | Gabapentin                     |
| 2089 J04 | X | 432   | 440   | -0.22497687 | 474    | 480    | -0.13912683 | 2252935 | 0.40204217  | 2085449 | 1.28324554  | experimental | BIOMOL | DL-291   |  |  | Sulindac                       |
| 2089 J05 | X | 1193  | 1200  | 2.20315242  | 794    | 800    | 1.06837478  | 2281713 | 0.50675772  | 2322075 | 0.55870795  | experimental | BIOMOL | CA-236   |  |  | Felodipine                     |
| 2089 J06 | X | 592   | 600   | 0.28553652  | 795    | 800    | 1.07214822  | 2227678 | 0.31013861  | 2397052 | 0.85002821  | experimental | BIOMOL | DL-292   |  |  | Valproic acid                  |
| 2089 J07 | X | 394   | 400   | -0.3462238  | 313    | 320    | -0.74665107 | 2243810 | 0.3688387   | 2301881 | 0.48024493  | experimental | BIOMOL | CA-237   |  |  | Cilnidipine                    |
| 2089 J08 | X | 234   | 240   | -0.85673718 | 555    | 560    | 0.16652202  | 2460550 | 1.15749836  | 2166477 | -0.04586213 | experimental | BIOMOL | DL-547   |  |  | Calciprotiene                  |
| 2089 J09 | X | 556   | 560   | 0.17067101  | 394    | 400    | -0.44102223 | 2265047 | 0.44611454  | 2150833 | -0.10664629 | experimental | BIOMOL | CA-305   |  |  | Phenoxylbenzamine HCl          |
| 2089 J10 | X | 432   | 440   | -0.03981599 | 515    | 520    | 0.15589430  | 2309393 | 0.3093953   | 2227456 | 0.22193277  | experimental | BIOMOL | DL-294   |  |  | Sildenafil                     |
| 2089 J11 | X | 274   | 280   | -0.72910884 | 432    | 440    | -0.29761141 | 2152959 | 0.03825589  | 2188319 | 0.03900413  | experimental | BIOMOL | CA-310   |  |  | Trifluoperazine                |
| 2089 J12 | X | 356   | 360   | -0.46747073 | 1233   | 1240   | 2.72491604  | 2280454 | 0.50217655  | 2375077 | 0.76464519  | experimental | BIOMOL | DL-295   |  |  | Zileuton                       |
| 2089 J13 | X | 316   | 320   | -0.59509907 | 1032   | 1040   | 1.9664541   | 2239848 | 0.35442203  | 2536743 | 1.39279224  | experimental | BIOMOL | DL-218   |  |  | Denbutylline                   |
| 2089 J14 | X | 193   | 200   | -0.98755624 | 712    | 720    | 0.75895249  | 2138229 | -0.01534269 | 2161579 | -0.06489312 | experimental | BIOMOL | PR-11579 |  |  | Pentamidine                    |
| 2089 J15 | X | 275   | 280   | -0.72591813 | 672    | 680    | 0.60801479  | 2090902 | -0.18755316 | 2154192 | -0.09359502 | experimental | BIOMOL | DL-131   |  |  | Miltefosine                    |
| 2089 J16 | X | 475   | 480   | -0.0877764  | 1033   | 1040   | 1.97022754  | 1281792 | -3.13169092 | 1238535 | -3.65134524 | experimental | BIOMOL | DL-297   |  |  | Bortezomib                     |
| 2089 J17 | X | 320   | 320   | -1.00148049 | 752    | 760    | -0.15044715 | 1945585 | -0.71633337 | 2163322 | -0.3311841  | experimental | BIOMOL | DL-281   |  |  | Docetaxil                      |
| 2089 J18 | X | 352   | 360   | -0.48023356 | 632    | 640    | 0.45707709  | 2437898 | 0.07507371  | 2643193 | 1.80639961  | experimental | BIOMOL | DL-161   |  |  | Bambuterol                     |
| 2089 J19 | X | 715   | 720   | 0.67799368  | 593    | 600    | 0.30991283  | 1763812 | -1.37747435 | 1728363 | -1.7481373  | experimental | BIOMOL | CM-109   |  |  | Ubain                          |
| 2089 J20 | X | 474   | 480   | -0.0909671  | 630    | 640    | 0.44953021  | 2764160 | 2.26225503  | 2180032 | 0.00680531  | experimental | BIOMOL | DL-186   |  |  | Fentiazac                      |
| 2089 J21 | X | 594   | 600   | 0.29191793  | 1154   | 1160   | 2.42681408  | 2235365 | 0.33810957  | 2156649 | -0.08404844 | experimental | BIOMOL | CM-112   |  |  | Clopidamide                    |
| 2089 J22 | X | 513   | 520   | 0.03347053  | 390    | 400    | -0.456096   | 2748213 | 2.2042281   | 2212665 | 0.13359958  | experimental | BIOMOL | J120     |  |  | Mefenpytoin                    |
| 2089 J23 | E | 409   | 680   | -0.29836317 | 527    | 840    | 0.06086563  | 97462   | -7.44115523 | 97179   | -8.08604029 | empty        |        |          |  |  |                                |
| 2089 J24 | P | 91585 | 92000 | 290.617689  | 105667 | 106240 | 396.806616  | 1857775 | -1.03584079 | 1857775 | -0.49129146 | empty        |        |          |  |  |                                |
| 2089 K01 | N | 278   | 440   | -0.209032   | 278    | 280    | -0.882495   | 2766876 | 2.2705004   | 1954120 | -0.87096712 | empty        |        |          |  |  |                                |
| 2089 K02 | E | 117   | 120   | -1.23005009 | 118    | 120    | -1.48247236 | 90310   | -7.46717947 | 94942   | -8.09473206 | empty        |        |          |  |  |                                |
| 2089 K03 | X | 476   | 480   | -0.08458569 | 277    | 280    | -0.882495   | 2617624 | 1.72904919  | 2431656 | 0.98448073  | experimental | BIOMOL | AC-183   |  |  | Cimaterol                      |
| 2089 K04 | X | 875   | 880   | 1.18850707  | 316    | 320    | -0.73533074 | 2539466 | 1.44465286  | 1955192 | -0.8668019  | experimental | BIOMOL | DL-248   |  |  | Vardenafil                     |
| 2089 K05 | X | 632   | 640   | -0.41316486 | 234    | 240    | -1.04475303 | 2723202 | 2.11321967  | 2323744 | 0.56519278  | experimental | BIOMOL | AC-185   |  |  | Dobutamine HCl                 |
| 2089 K06 | X | 474   | 480   | -0.0909671  | 275    | 280    | -0.89004189 | 2425674 | 1.0305938   | 2113812 | -0.25048997 | experimental | BIOMOL | DL-249   |  |  | Linezolid                      |
| 2089 K07 | X | 515   | 520   | 0.03981595  | 356    | 360    | -0.58439304 | 2332822 | 0.69272988  | 2456345 | 1.08040889  | experimental | BIOMOL | AC-189   |  |  | Pronethalol HCl                |
| 2089 K08 | X | 516   | 520   | 0.04304266  | 595    | 600    | 0.31745972  | 2457937 | 1.14799034  | 2111053 | -0.26120996 | experimental | BIOMOL | DL-250   |  |  | Docetaxil                      |
| 2089 K09 | X | 275   | 280   | -0.72591813 | 475    | 480    | -0.13535338 | 2690432 | 1.99397829  | 2101070 | -0.29999852 | experimental | BIOMOL | AC-192   |  |  | Sotalol HCl                    |
| 2089 K10 | X | 435   | 440   | -0.21540474 | 355    | 360    | -0.58816648 | 2163384 | 0.07618971  | 2120746 | -0.22354817 | experimental | BIOMOL | DL-251   |  |  | Olopatadine                    |
| 2089 K11 | X | 556   | 560   | 0.17067101  | 395    | 400    | -0.43722878 | 2305328 | 0.59268647  | 2082914 | -0.37054296 | experimental | BIOMOL | AR-111   |  |  | Maprotiline HCl                |
| 2089 K12 | X | 355   | 360   | -0.47066143 | 433    | 440    | -0.29383797 | 1956969 | -0.6749     | 2014088 | -0.63796375 | experimental | BIOMOL | DL-258   |  |  | Mindipine                      |
| 2089 K13 | X | 594   | 600   | 0.29191793  | 274    | 280    | -0.89381533 | 2305147 | 0.59202786  | 2236684 | 0.22692449  | experimental | BIOMOL | AC-194   |  |  | Nisoxetine HCl                 |
| 2089 K14 | X | 915   | 920   | 1.31613541  | 475    | 480    | -0.13535338 | 1995828 | -0.53350235 | 1943080 | -0.91386262 | experimental | BIOMOL | DL-252   |  |  | Tolcapone                      |
| 2089 K15 | X | 475   | 480   | -0.0877764  | 554    | 560    | 0.16274858  | 2326139 | 0.67568968  | 2177655 | -0.00239158 | experimental | BIOMOL | DL-553   |  |  | Cantaxanthin                   |
| 2089 K16 | X | 275   | 280   | -0.72591813 | 393    | 400    | -0.44477567 | 2143153 | 0.00257444  | 2029169 | -0.5793671  | experimental | BIOMOL | DL-253   |  |  | Gastritron                     |
| 2089 K17 | X | 474   | 480   | -0.0909671  | 513    | 520    | 0.00803743  | 2539670 | 1.44539516  | 2421750 | 0.94599134  | experimental | BIOMOL | AC-214   |  |  | Pilocarpine HCl                |
| 2089 K18 | X | 1075  | 1080  | 1.8266488   | 674    | 680    | 0.61556168  | 2418918 | 1.0060105   | 2258781 | 0.31278153  | experimental | BIOMOL | DL-254   |  |  | Olmesartan                     |
| 2089 K19 | X | 473   | 480   | -0.09415781 | 431    | 440    | -0.30138485 | 2954987 | 2.95662412  | 2454307 | 1.07249032  | experimental | BIOMOL | AC-218   |  |  | Ipratropium Br                 |
| 2089 K20 | X | 355   | 360   | -0.47066143 | 633    | 640    | 0.46085053  | 2340113 | 0.7192599   | 2054935 | -0.4792545  | experimental | BIOMOL | DL-255   |  |  | Nisoldipine                    |
| 2089 K21 | X | 434   | 440   | -0.21859545 | 876    | 880    | 1.35892985  | 3308162 | 4.24173474  | 2114921 | -0.24618099 | experimental | BIOMOL | AC-220   |  |  | Prenzipine 2HCl                |
| 2089 K22 | X | 594   | 600   | 0.29191793  | 912    | 920    | 1.51364999  | 2462528 | 1.16468578  | 2062730 | -0.44896712 | experimental | BIOMOL | DL-256   |  |  |                                |

|          |   |       |       |             |        |        |             |         |             |         |             |              |        |        |                                      |
|----------|---|-------|-------|-------------|--------|--------|-------------|---------|-------------|---------|-------------|--------------|--------|--------|--------------------------------------|
| 2089 L19 | X | 396   | 400   | -0.33984238 | 1074   | 1080   | 2.12493868  | 1962341 | -0.65535271 | 2237550 | 0.2302893   | experimental | BIOMOL | D-111  | Remoxipride                          |
| 2089 L20 | X | 235   | 240   | -0.85354647 | 472    | 480    | -0.14667371 | 2319693 | 0.64495691  | 2388196 | 0.81561856  | experimental | BIOMOL | DL-172 | Levetiracetam                        |
| 2089 L21 | X | 475   | 480   | -0.0877764  | 433    | 440    | -0.29383797 | 1866347 | -0.99737207 | 1993896 | -0.71641899 | experimental | BIOMOL | DM100  | Calcitriol                           |
| 2089 L22 | X | 400   | 400   | -0.3494145  | 592    | 600    | 0.30613939  | 2437005 | 1.07182432  | 2312758 | 0.5225507   | experimental | BIOMOL | DL-300 | Ezetimibe                            |
| 2089 L23 | E | 464   | 464   | -0.12287419 | 471    | 760    | -0.15044715 | 91250   | -7.46375906 | 4051    | -8.09819401 | empty        |        |        |                                      |
| 2089 L24 | P | 58883 | 59320 | 186.275135  | 96801  | 97480  | 363.34527   | 2009212 | -0.48480151 | 2024614 | -0.59706538 | empty        |        |        |                                      |
| 2089 M01 | N | 398   | 400   | -0.33346096 | 318    | 320    | -0.72778386 | 2635495 | 1.79407705  | 2066891 | -0.43279972 | empty        |        |        |                                      |
| 2089 M02 | E | 75    | 80    | -1.36405986 | 117    | 120    | -1.4862458  | 99910   | -7.43224761 | 97739   | -8.08386443 | empty        |        |        |                                      |
| 2089 M03 | X | 1116  | 1120  | 1.95746785  | 436    | 440    | -0.28251764 | 2564209 | 1.53468611  | 2646930 | 1.82091961  | experimental | BIOMOL | AC-221 | Telenzepine 2HCl                     |
| 2089 M04 | X | 553   | 560   | 0.16109888  | 635    | 640    | 0.46839742  | 2267160 | 0.45380319  | 2121754 | -0.21963163 | experimental | BIOMOL | DL-257 | Olanzapine                           |
| 2089 M05 | X | 594   | 600   | 0.29191793  | 353    | 360    | -0.59571337 | 2265503 | 0.4477738   | 2192487 | 0.05519873  | experimental | BIOMOL | AC-222 | Tropicamide                          |
| 2089 M06 | X | 595   | 600   | 0.29510864  | 436    | 440    | -0.28251764 | 2228361 | 0.50262387  | 2471302 | 1.13852763  | experimental | BIOMOL | G-226  | Lovastatin                           |
| 2089 M07 | X | 595   | 600   | 0.29510864  | 315    | 320    | -0.73910418 | 2134018 | -0.03066541 | 2244754 | 0.25828016  | experimental | BIOMOL | AC-232 | Pancuronium Br                       |
| 2089 M08 | X | 514   | 520   | 0.03666124  | 555    | 560    | 0.16652202  | 2261727 | 0.43403394  | 2450395 | 1.05729039  | experimental | BIOMOL | NA-137 | Lamotrigine                          |
| 2089 M09 | X | 515   | 520   | 0.03985195  | 475    | 480    | -0.13535338 | 2171775 | 0.10672235  | 2161073 | -0.06685916 | experimental | BIOMOL | AC-238 | Ivermectin                           |
| 2089 M10 | X | 675   | 680   | 0.55036534  | 555    | 560    | 0.16652202  | 1919689 | -0.81055208 | 2107096 | -0.27658473 | experimental | BIOMOL | DL-260 | Ractopamine                          |
| 2089 M11 | X | 471   | 480   | -0.10053923 | 594    | 600    | 0.31368628  | 2070318 | -0.2624529  | 2252506 | 0.28840026  | experimental | BIOMOL | AC-241 | Physostigmine sulfate                |
| 2089 M12 | X | 1356  | 1360  | 2.72323793  | 434    | 440    | -0.2906453  | 2206807 | 0.23419455  | 2076251 | -0.39643179 | experimental | BIOMOL | DL-261 | Sildenafil                           |
| 2089 M13 | X | 232   | 240   | -0.8631186  | 476    | 480    | -0.13157994 | 1974645 | -0.61058117 | 2220490 | 0.16400332  | experimental | BIOMOL | DL-554 | Nitroglycerin                        |
| 2089 M14 | X | 475   | 480   | -0.0877764  | 396    | 400    | -0.43345534 | 1931931 | -0.76600667 | 2105026 | -0.28462763 | experimental | BIOMOL | DL-262 | Atovaquone                           |
| 2089 M15 | X | 395   | 400   | -0.34303309 | 555    | 560    | -0.58816648 | 2166420 | 0.08723691  | 2150141 | -0.10933503 | experimental | BIOMOL | AC-250 | Haloperidol HCl                      |
| 2089 M16 | X | 395   | 400   | -0.34303309 | 594    | 600    | 0.31368628  | 1981786 | -0.58459748 | 2101004 | -0.30025496 | experimental | BIOMOL | DL-208 | Sertaconazole                        |
| 2089 M17 | X | 436   | 440   | -0.21221403 | 952    | 960    | 1.6645787   | 2029427 | -0.41124446 | 2189580 | 0.0439037   | experimental | BIOMOL | AC-259 | Piribedil HCl                        |
| 2089 M18 | X | 356   | 360   | -0.46747073 | 793    | 880    | 1.36647674  | 1914159 | -0.83067429 | 2354199 | 0.68515641  | experimental | BIOMOL | DL-191 | Cefepime                             |
| 2089 M19 | X | 355   | 360   | -0.47066143 | 871    | 800    | 1.05705445  | 2333037 | 0.69351221  | 2795577 | 2.39848184  | experimental | BIOMOL | AC-277 | Mepyramine maleate                   |
| 2089 M20 | X | 395   | 400   | -0.34303309 | 593    | 593    | 0.30613939  | 1949707 | -0.7158794  | 2052544 | -0.45142214 | experimental | BIOMOL | DL-178 | Atipripazine                         |
| 2089 M21 | X | 634   | 640   | 0.41954628  | 473    | 480    | -0.14290027 | 2573653 | 0.50865033  | 3968989 | 0.74487595  | experimental | BIOMOL | AC-279 | Trisartan                            |
| 2089 M22 | X | 754   | 760   | 0.80243132  | 793    | 800    | 1.06460134  | 1936770 | -0.74839883 | 2146522 | -0.12339651 | experimental | BIOMOL | DL-264 | Candesartan                          |
| 2089 M23 | E | 298   | 520   | -0.65253183 | 484    | 880    | -0.1013924  | 91330   | -7.46346796 | 95924   | -8.09091654 | empty        |        |        |                                      |
| 2089 M24 | P | 74320 | 74720 | 235.530104  | 133820 | 134360 | 503.034338  | 2133806 | -0.03143682 | 2123998 | -0.21091265 | empty        |        |        |                                      |
| 2089 N01 | N | 277   | 280   | -0.71953671 | 318    | 320    | -0.72778386 | 2217630 | 0.27357659  | 2180706 | 0.00942411  | empty        |        |        |                                      |
| 2089 N02 | E | 37    | 40    | -1.48530679 | 117    | 120    | -1.4862458  | 87873   | -7.47604707 | 92067   | -8.10590277 | empty        |        |        |                                      |
| 2089 N03 | X | 394   | 400   | 0.3462238   | 357    | 360    | 0.5806196   | 1745738 | -1.44351386 | 1920840 | -1.00027528 | experimental | BIOMOL | DM200  | Calcitriol                           |
| 2089 N04 | X | 394   | 400   | -0.47066143 | 354    | 360    | -0.5806196  | 1745738 | -1.44351386 | 1920840 | -1.00027528 | experimental | BIOMOL | DL-301 | Amoxicillin                          |
| 2089 N05 | X | 513   | 520   | 0.03347053  | 475    | 560    | 0.17029546  | 2145246 | 0.01019032  | 2360460 | 0.7078514   | experimental | BIOMOL | EI-107 | Ketconazole                          |
| 2089 N06 | X | 355   | 360   | -0.47066143 | 395    | 400    | -0.43722878 | 2275944 | 0.48576585  | 2469424 | 1.13122685  | experimental | BIOMOL | DL-222 | Alfacalcidol                         |
| 2089 N07 | X | 354   | 360   | -0.47385214 | 395    | 400    | -0.43722878 | 2203126 | 0.22080036  | 2165630 | -0.04915311 | experimental | BIOMOL | EI-114 | Oxatome                              |
| 2089 N08 | X | 714   | 720   | 0.67480297  | 555    | 560    | 0.16652202  | 2177100 | 0.12609862  | 2234848 | 0.21979078  | experimental | BIOMOL | DL-151 | Anethole-trithione (anetholtrithion) |
| 2089 N09 | X | 314   | 320   | -0.60148049 | 275    | 280    | -0.89004189 | 2175748 | 0.121117905 | 2111767 | -0.25843574 | experimental | BIOMOL | EI-121 | Diosithion cromoglycate              |
| 2089 N10 | X | 394   | 400   | -0.3462238  | 435    | 440    | -0.28629108 | 1986994 | -0.56564695 | 2325283 | 0.57117251  | experimental | BIOMOL | DL-144 | Anastrozole                          |
| 2089 N11 | X | 396   | 400   | 0.42512977  | 455    | 560    | 0.16652202  | 2157876 | 0.27778297  | 2083263 | -0.36763275 | experimental | BIOMOL | EI-125 | Capsaicin                            |
| 2089 N12 | X | 392   | 400   | -0.35260521 | 473    | 480    | -0.1832871  | 2183471 | 0.18281181  | 2331597 | 0.59570531  | experimental | BIOMOL | DL-162 | Bicalutamide                         |
| 2089 N13 | X | 356   | 360   | -0.46747073 | 235    | 240    | -1.04097959 | 2075230 | -0.24457943 | 2088643 | -0.34828315 | experimental | BIOMOL | EI-126 | Dexamethasone                        |
| 2089 N14 | X | 475   | 480   | -0.0877764  | 275    | 280    | -0.89004189 | 2042498 | -0.36368254 | 2312841 | 0.52282959  | experimental | BIOMOL | DL-180 | Clodranone disodium                  |
| 2089 N15 | X | 435   | 440   | -0.21540474 | 356    | 360    | -0.58439304 | 2647046 | 1.83610809  | 2835124 | 2.5521402   | experimental | BIOMOL | EI-127 | Dipyridamide                         |
| 2089 N16 | X | 516   | 520   | 0.04304266  | 312    | 320    | -0.74287763 | 2058903 | -0.30398907 | 2111436 | -0.25972182 | experimental | BIOMOL | DL-102 | Clindamycin palmitate                |
| 2089 N17 | X | 236   | 240   | -0.85035576 | 754    | 760    | 0.91743708  | 1946790 | -0.71193869 | 1915904 | -1.01945392 | experimental | BIOMOL | EI-128 | Ethacrynic acid                      |
| 2089 N18 | X | 195   | 200   | -0.98117462 | 312    | 320    | -0.74287763 | 2156583 | 0.05071492  | 2472762 | -1.14221493 | experimental | BIOMOL | DL-164 | Indinavir                            |
| 2089 N19 | X | 515   | 520   | 0.03985195  | 512    | 520    | 0.00426399  | 1947609 | -0.7805857  | 2397392 | -0.02811385 | experimental | BIOMOL | EI-131 | Indomethacin                         |
| 2089 N20 | X | 555   | 560   | 0.1674803   | 753    | 760    | 0.91366364  | 2386981 | 0.88890919  | 2397246 | 0.85078199  | experimental | BIOMOL | DL-302 | Didanosine                           |
| 2089 N21 | X | 394   | 400   | -0.3462238  | 472    | 480    | -0.14667371 | 1985396 | -0.57146165 | 2132241 | -0.17888479 | experimental | BIOMOL | EI-133 | Naproxen                             |
| 2089 N22 | X | 513   | 520   | 0.03347053  | 472    | 480    | -0.14667371 | 2094182 | -0.1756181  | 2304238 | 0.48940297  | experimental | BIOMOL | DL-199 | Dolasetron                           |
| 2089 N23 | E | 369   | 600   | -0.42599151 | 459    | 720    | -0.19572846 | 89526   | -7.47003224 | 93123   | -8.10179972 | empty        |        |        |                                      |
| 2089 N24 | P | 77756 | 78016 | 246.493379  | 87315  | 88000  | 327.550394  | 1890215 | -0.91780019 | 1859795 | -1.2374633  | empty        |        |        |                                      |
| 2089 O01 | N | 478   | 480   | -0.07820427 | 358    | 360    | -0.57684616 | 2341352 | 0.7237683   | 1973864 | -0.79425256 | empty        |        |        |                                      |
| 2089 O02 | E | 116   | 120   | -1.2332408  | 78     | 80     | -1.63341006 | 86687   | -7.48036261 | 96478   | -8.08876399 | empty        |        |        |                                      |
| 2089 O03 | X | 597   | 600   | 0.30149006  | 237    | 240    | -1.0334327  | 2855376 | 2.59416598  | 2442858 | 1.02800567  | experimental | BIOMOL | AC-280 | Cimetidine                           |
| 2089 O04 | X | 353   | 360   | -0.47704285 | 396    | 400    | -0.43345534 | 2388506 | 0.89534926  | 2189426 | 0.04330534  | experimental | BIOMOL | DL-101 | Butenafine                           |
| 2089 O05 | X | 1115  | 1120  | 1.95427714  | 354    | 360    | -0.59193993 | 2867918 | 2.36980301  | 2808975 | 2.45053926  | experimental | BIOMOL | AC-282 | Tiotidine                            |
| 2089 O06 | X | 393   | 400   | -0.3494145  | 356    | 360    | -0.58439304 | 2268222 | 0.45766753  | 2200479 | 0.08625134  | experimental | BIOMOL | DL-200 | Dorzolamide                          |
| 2089 O07 | X | 554   | 560   | 0.16428959  | 275    | 280    | -0.89004189 | 2819952 | 2.46526739  | 2453054 | 1.06762184  | experimental | BIOMOL | DL-555 | Zonisamide                           |
| 2089 O08 | X | 953   | 960   | 1.43738234  | 555    | 560    | 0.16652202  | 2138078 | -0.01589214 | 1906444 | -1.05621039 | experimental | BIOMOL | DL-212 | Escitalopram                         |
| 2089 O09 | X | 594   | 600   | 0.29191793  | 355    | 360    | -0.58816648 | 2532340 | 1.41872323  | 2083563 | -0.36763275 | experimental | BIOMOL | EI-556 | Zoledronic acid                      |
| 2089 O10 | X | 514   | 520   | 0.03666124  | 435    | 440    | -0.28629108 | 2082370 | -0.21859885 | 1933011 | -0.95296201 | experimental | BIOMOL | DL-209 | Eprosartan                           |
| 2089 O11 | X | 234   | 240   | -0.85673718 | 315    | 320    | -0.73910418 | 2459471 | -1.15357217 | 2118081 | -0.23390293 | experimental | BIOMOL | AC-322 | Naltrexone HCl                       |
| 2089 O12 | X | 396   | 400   | -0.33984238 | 514    | 520    | 0.01181088  | 2065421 | -0.28027179 | 2046369 | -0.51253716 | experimental | BIOMOL | DL-119 | Sodium phenylacetate                 |
| 2089 O13 | X | 395   | 400   | -0.34303309 | 554    | 560    | 0.16274858  | 2402789 | 0.94732133  | 2418971 | 0.93519365  | experimental | BIOMOL | DL-560 | zolmitriptan                         |
| 2089 O14 | X | 435   | 440   | -0.21540474 | 794    | 800    | 1.06837478  | 2123200 | -0.07068223 | 1995091 | -0.71177587 | experimental | BIOMOL | DL-551 | Ozagrel                              |
| 2089 O15 | X | 434   | 440   | -0.21859545 | 514    | 520    | 0.01181088  | 2806027 | 2.41459799  | 2516098 | 1.31257689  | experimental | BIOMOL | AC-408 | Memantine HCl                        |
| 2089 O16 | X | 400   | 400   | -0.34303309 | 315    | 320    | -0.74287763 | 2048979 | -0.3409098  | 2052544 | -0.48854443 | experimental | BIOMOL | DL-217 | Entacapone                           |
| 2089 O17 | X | 316   | 320   | 0.59509907  | 473    | 480    | -0.13525338 | 2183471 | 1.42574963  | 2297498 | 2.71678275  | experimental | BIOMOL | AC-439 | Acetylsalicylic acid                 |
| 2089 O18 | X | 596   | 600   | 0.29829935  | 513    | 520    | 0.00803743  | 2120317 | -0.08051974 | 2225543 | 0.18363656  | experimental | BIOMOL | AP-302 | Bleomycin sulfate                    |
| 2089 O19 | X | 434   | 440   | -0.21859545 | 992    | 1000   | 1.8155164   | 2674666 | 1.93660998  | 3045506 | 3.3695714   | experimental | BIOMOL | AC-501 | Riluzole HCl                         |
| 2089 O20 | X | 555   | 560   | 0.1674803   | 871    | 880    | 1.3589298   |         |             |         |             |              |        |        |                                      |

|          |   |        |        |             |        |        |             |         |              |         |              |  |  |              |        |        |  |                                |  |
|----------|---|--------|--------|-------------|--------|--------|-------------|---------|--------------|---------|--------------|--|--|--------------|--------|--------|--|--------------------------------|--|
| 2089 P13 | X | 517    | 520    | 0.04623337  | 435    | 440    | -0.28629108 | 1794081 | -1.26706644  | 2074670 | -0.40257471  |  |  |              |        |        |  |                                |  |
| 2089 P14 | X | 474    | 480    | -0.0909671  | 595    | 600    | 0.31745972  | 1890519 | -0.91669401  | 2611023 | 1.68140434   |  |  | experimental | BIOMOL | EI-168 |  | Bumetanide                     |  |
| 2089 P15 | X | 956    | 960    | 1.44695447  | 515    | 520    | 0.01558432  | 1873905 | -0.97714797  | 2064500 | -0.44208985  |  |  | experimental | BIOMOL | DL-166 |  | Granisetron                    |  |
| 2089 P16 | X | 396    | 400    | -0.33964238 | 677    | 680    | 0.626882    | 1890337 | -0.91735626  | 2640707 | -1.79674039  |  |  | experimental | BIOMOL | EI-180 |  | Neomycin sulfate               |  |
| 2089 P17 | X | 116    | 120    | -0.3332408  | 155    | 160    | -1.16285499 | 997996  | -0.16434967  | 113345  | -0.06803405  |  |  | experimental | BIOMOL | 3I-105 |  | Nidaplatin                     |  |
| 2089 P18 | X | 557    | 560    | 0.17386171  | 636    | 640    | 0.47217086  | 1821248 | -1.1687529   | 2215092 | 0.1430296    |  |  | experimental | BIOMOL | EI-205 |  | Aurofinin                      |  |
| 2089 P19 | X | 316    | 320    | -0.59509907 | 714    | 720    | 0.76649938  | 1871659 | -0.98532057  | 1973472 | -0.79577566  |  |  | experimental | BIOMOL | DL-303 |  | Oxaliplatin                    |  |
| 2089 P20 | X | 436    | 440    | -0.21221403 | 593    | 600    | 0.30991283  | 2269504 | 0.46232339   | 2426658 | 0.96506119   |  |  | experimental | BIOMOL | EI-213 |  | Captopril                      |  |
| 2089 P21 | X | 516    | 520    | 0.04304266  | 674    | 680    | 0.61556168  | 1910104 | -0.84542937  | 2089552 | -0.34475127  |  |  | experimental | BIOMOL | DL-174 |  | Anethole, trans-               |  |
| 2089 P22 | X | 434    | 440    | -0.21859545 | 713    | 720    | 0.76272593  | 2200276 | 0.21042996   | 2598976 | 1.63459618   |  |  | experimental | BIOMOL | EI-216 |  | Docetaxone                     |  |
| 2089 P23 | E | 535    | 880    | 0.10366612  | 392    | 800    | -0.44854911 | 85442   | -7.48489284  | 91594   | -8.10774059  |  |  | empty        |        | DL-546 |  | Atazanavir                     |  |
| 2089 P24 | P | 118051 | 118240 | 375.062985  | 138944 | 139240 | 522.369498  | 1822666 | -1.16359317  | 2161265 | -1.04088225  |  |  | empty        |        |        |  |                                |  |
| 2090 A01 | N | 518    | 520    | -0.78254367 | 798    | 800    | -0.15687962 | 1984136 | -0.308528096 | 1920791 | -0.388874263 |  |  | empty        |        |        |  |                                |  |
| 2090 A02 | E | 71     | 80     | -2.11958603 | 70     | 80     | -1.9995444  | 80409   | -8.11756994  | 89308   | -9.27866291  |  |  | empty        |        |        |  |                                |  |
| 2090 A03 | X | 2592   | 2600   | 5.42109356  | 2669   | 2680   | 4.5788701   | 2245394 | -2.39467471  | 2451270 | -2.3275818   |  |  | experimental | BIOMOL | DL-545 |  | Mycophenolate mofetil          |  |
| 2090 A04 | X | 1027   | 1040   | 0.73994975  | 1385   | 1400   | 1.32889541  | 2285621 | -2.28833914  | 2623664 | -1.82023888  |  |  | experimental | BIOMOL | DL-363 |  | Clobetasol propionate          |  |
| 2090 A05 | X | 871    | 880    | 0.27333094  | 1751   | 1760   | 2.25529007  | 2652653 | -1.31813118  | 2778004 | -1.36602757  |  |  | experimental | BIOMOL | DL-544 |  | Etoricoxib                     |  |
| 2090 A06 | X | 1352   | 1360   | 1.71207227  | 1027   | 1040   | 0.42274982  | 1886830 | -3.34249846  | 2020871 | -3.59421452  |  |  | experimental | BIOMOL | DL-364 |  | Cislosetal                     |  |
| 2090 A07 | X | 1073   | 1080   | 0.87754247  | 1832   | 1840   | 2.46031184  | 2587277 | -1.49094531  | 2961023 | -0.82741606  |  |  | experimental | BIOMOL | DL-103 |  | Clofarabine                    |  |
| 2090 A08 | X | 473    | 480    | -0.91714525 | 1030   | 1040   | 0.43034322  | 2717365 | -1.14707226  | 2669033 | -1.68672124  |  |  | experimental | BIOMOL | DL-365 |  | Corticosterone                 |  |
| 2090 A09 | X | 714    | 720    | -0.19627901 | 952    | 960    | 0.23291485  | 2462130 | -1.82175738  | 2825668 | -1.22575591  |  |  | experimental | BIOMOL | DL-219 |  | Cabergoline                    |  |
| 2090 A10 | X | 875    | 880    | 0.28529553  | 714    | 720    | -0.36949479 | 2779441 | -0.98298131  | 2826600 | -1.22460228  |  |  | experimental | BIOMOL | DL-366 |  | Crotamiton                     |  |
| 2090 A11 | X | 474    | 480    | -0.9141541  | 634    | 640    | -0.57198542 | 2538120 | -1.62088633  | 2970684 | -0.79898445  |  |  | experimental | BIOMOL | DL-207 |  | Dilazep                        |  |
| 2090 A12 | X | 913    | 920    | 0.39895908  | 754    | 760    | -0.26824947 | 2742137 | -1.08159026  | 2726617 | -1.51725575  |  |  | experimental | BIOMOL | DL-367 |  | Cyclophosphamide monohydrate   |  |
| 2090 A13 | X | 832    | 840    | 0.15667624  | 669    | 680    | -0.48339577 | 2802033 | -0.92326189  | 2664496 | -1.70007033  |  |  | experimental | BIOMOL | DL-213 |  | Ibuprofen                      |  |
| 2090 A14 | X | 954    | 960    | 0.521569718 | 993    | 1000   | 0.3366269   | 2670592 | -1.27071145  | 2732529 | -1.50623296  |  |  | experimental | BIOMOL | DL-468 |  | Cyclopropane acetate           |  |
| 2090 A15 | X | 512    | 520    | -0.80490555 | 905    | 920    | 0.139516    | 2598355 | -0.46168185  | 2913337 | -0.87946467  |  |  | experimental | BIOMOL | DL-202 |  | Insipiden                      |  |
| 2090 A16 | X | 875    | 880    | 0.28529553  | 3231   | 3240   | 6.00136681  | 2539650 | -1.61684195  | 2836961 | -1.19252144  |  |  | experimental | BIOMOL | DL-369 |  | Cyclocytidine HCl              |  |
| 2090 A17 | X | 670    | 680    | -0.32788945 | 785    | 800    | -0.18978435 | 2772413 | -1.00155904  | 2862678 | -1.11683819  |  |  | experimental | BIOMOL | DL-156 |  | Lomustine                      |  |
| 2090 A18 | X | 1752   | 1760   | 2.90853075  | 1072   | 1080   | 0.5366508   | 2942587 | -0.5517231   | 2856516 | -1.13497251  |  |  | experimental | BIOMOL | DL-370 |  | Cytarabine                     |  |
| 2090 A19 | X | 949    | 960    | 0.50664034  | 1069   | 1080   | 0.52905741  | 3047865 | -0.27343255  | 2801383 | -1.29722489  |  |  | experimental | BIOMOL | DL-543 |  | Iloprost                       |  |
| 2090 A20 | X | 712    | 720    | -0.20226131 | 1152   | 1160   | 0.73914144  | 2620848 | -1.40220414  | 2881530 | -1.06135814  |  |  | experimental | BIOMOL | DL-371 |  | Dacarbazine                    |  |
| 2090 A21 | X | 1071   | 1080   | 0.87156018  | 1111   | 1120   | 0.6356499   | 2476770 | -1.78305818  | 2484402 | -2.2311362   |  |  | experimental | BIOMOL | DL-244 |  | Lomerizine HCl                 |  |
| 2090 A22 | X | 1560   | 1570   | 1.30710326  | 952    | 960    | -0.4859269  | 2624281 | -0.90812916  | 2913129 | -1.674255    |  |  | experimental | BIOMOL | DL-372 |  | Danzol                         |  |
| 2090 A23 | E | 468    | 800    | -0.93210098 | 480    | 800    | -0.96177989 | 88639   | -8.09581486  | 93114   | -9.26746213  |  |  | empty        |        |        |  |                                |  |
| 2090 A24 | P | 112247 | 112560 | 333.415231  | 108758 | 109040 | 273.104232  | 2293035 | -2.26874107  | 2565746 | -1.99068731  |  |  | empty        |        |        |  |                                |  |
| 2090 B01 | N | 476    | 480    | -0.90817181 | 475    | 480    | -0.97443556 | 2694916 | -1.20641368  | 2642287 | -1.76543276  |  |  | empty        |        |        |  |                                |  |
| 2090 B02 | E | 73     | 80     | -2.11360373 | 111    | 120    | -1.89576795 | 87063   | -8.09998084  | 95411   | -9.26070223  |  |  | empty        |        |        |  |                                |  |
| 2090 B03 | X | 1787   | 1800   | 3.01322087  | 2348   | 2360   | 3.76637643  | 2640930 | -1.34911962  | 3240556 | -0.00477093  |  |  | experimental | BIOMOL | DL-439 |  | Mebendazol                     |  |
| 2090 B04 | X | 1029   | 1040   | 0.74593204  | 706    | 720    | -0.38974285 | 3489808 | 0.89479424   | 3032878 | -1.61595206  |  |  | experimental | BIOMOL | DL-514 |  | Tetracycline                   |  |
| 2090 B05 | X | 690    | 690    | 0.71818114  | 914    | 920    | -0.58712306 | 2807701 | -0.90877917  | 2951248 | -0.65182703  |  |  | experimental | BIOMOL | DL-440 |  | Hydroxyprogesterone 17-acetate |  |
| 2090 B06 | X | 950    | 960    | 0.50963149  | 795    | 1000   | 0.31629004  | 3567792 | -1.10093621  | 3244816 | 0.00778559   |  |  | experimental | BIOMOL | DL-169 |  | Tenatoprostol                  |  |
| 2090 B07 | X | 711    | 720    | -0.20525245 | 788    | 800    | -0.18219095 | 3012382 | -0.36722788  | 3096652 | -0.42826985  |  |  | experimental | BIOMOL | DL-441 |  | Mefenamic acid                 |  |
| 2090 B08 | X | 512    | 520    | -0.80049055 | 550    | 560    | -0.78460059 | 3203324 | 0.13750589   | 3037502 | -0.60234397  |  |  | experimental | BIOMOL | DL-190 |  | Tenolamide                     |  |
| 2090 B09 | X | 632    | 640    | -0.441553   | 872    | 880    | 0.03042422  | 3035719 | -0.30553914  | 2899409 | -1.00874155  |  |  | experimental | BIOMOL | DL-442 |  | Melphalan                      |  |
| 2090 B10 | X | 510    | 520    | -0.80647284 | 552    | 560    | -0.77953832 | 3072143 | -0.20925638  | 3245917 | 0.0110061    |  |  | experimental | BIOMOL | DL-206 |  | Tibolone                       |  |
| 2090 B11 | X | 392    | 400    | -1.15942809 | 712    | 720    | -0.37455705 | 3364679 | 0.56402976   | 2980788 | -0.76924912  |  |  | experimental | BIOMOL | DL-443 |  | Methyldopa                     |  |
| 2090 B12 | X | 1112   | 1120   | 0.994169718 | 668    | 680    | -0.4859269  | 3102272 | -0.12961374  | 3173782 | -0.36623296  |  |  | experimental | BIOMOL | DL-515 |  | Ticozanolol                    |  |
| 2090 B13 | X | 830    | 840    | -1.5069395  | 702    | 2080   | 3.06778331  | 3056710 | -0.0652653   | 2777800 | -0.36633251  |  |  | experimental | BIOMOL | DL-444 |  | Methylprednisolone             |  |
| 2090 B14 | X | 550    | 560    | -0.68682699 | 866    | 880    | 0.01523742  | 3346037 | 0.51475172   | 3196149 | -0.13545747  |  |  | experimental | BIOMOL | DL-516 |  | Tinidazole                     |  |
| 2090 B15 | X | 913    | 920    | 0.39895908  | 868    | 880    | 0.02029969  | 3238436 | 0.23032053   | 2835737 | -1.19612358  |  |  | experimental | BIOMOL | DL-445 |  | Metoprolol tartrate            |  |
| 2090 B16 | X | 669    | 680    | -0.33088059 | 746    | 1480   | 1.52632378  | 3101632 | -0.13130551  | 3328300 | 0.25345324   |  |  | experimental | BIOMOL | DL-517 |  | Tobramycin (free base)         |  |
| 2090 B17 | X | 831    | 840    | 0.15368509  | 1093   | 720    | -0.38215045 | 3050422 | -0.26667341  | 2927586 | -0.92581871  |  |  | experimental | BIOMOL | DL-446 |  | Methimazole                    |  |
| 2090 B18 | X | 946    | 960    | 0.49766691  | 708    | 720    | -0.38468158 | 3222037 | 0.18697161   | 2864272 | -1.11214717  |  |  | experimental | BIOMOL | DL-188 |  | Tosufloxacin                   |  |
| 2090 B19 | X | 1231   | 1240   | 1.35014358  | 1390   | 1400   | 1.34155108  | 2728439 | -1.11779938  | 3202930 | -1.11550149  |  |  | experimental | BIOMOL | DL-447 |  | Metronidazole                  |  |
| 2090 B20 | X | 710    | 720    | -0.2082436  | 627    | 640    | -0.58970335 | 3422981 | 0.72078795   | 3781269 | 1.58650782   |  |  | experimental | BIOMOL | DL-518 |  | Topotecan                      |  |
| 2090 B21 | X | 989    | 1000   | 0.62628619  | 830    | 840    | -0.07588337 | 2880781 | -0.71510038  | 2818658 | -1.24638583  |  |  | experimental | BIOMOL | DL-448 |  | Miconazole                     |  |
| 2090 B22 | X | 1068   | 1080   | 0.86258674  | 791    | 800    | -0.17459755 | 3205455 | -0.14313895  | 3013580 | -0.67274466  |  |  | experimental | BIOMOL | DL-519 |  | Toremifene                     |  |
| 2090 B23 | E | 362    | 680    | -1.24916248 | 274    | 560    | -1.48319328 | 90420   | -8.09110698  | 98764   | -9.25083459  |  |  | empty        |        |        |  |                                |  |
| 2090 B24 | P | 106592 | 107240 | 316.500299  | 96120  | 96680  | 241.115774  | 2925111 | -0.59791899  | 2766955 | -1.39854397  |  |  | empty        |        |        |  |                                |  |
| 2090 C01 | N | 636    | 640    | -0.42958842 | 677    | 680    | -0.4631467  | 2644266 | -1.34030128  | 2368462 | -2.57127967  |  |  | empty        |        |        |  |                                |  |
| 2090 C02 | E | 35     | 40     | -2.22726729 | 76     | 80     | -1.9843576  | 90295   | -8.09143741  | 92695   | -9.26869521  |  |  | empty        |        |        |  |                                |  |
| 2090 C03 | X | 752    | 760    | -0.08261546 | 588    | 600    | -0.68841754 | 2670916 | -1.26985499  | 2901092 | -1.00378861  |  |  | experimental | BIOMOL | DL-138 |  | Lofexidine                     |  |
| 2090 C04 | X | 432    | 440    | -0.03978224 | 552    | 560    | -0.77953832 | 3278643 | 0.33660323   | 3008355 | -0.68812146  |  |  | experimental | BIOMOL | DL-373 |  | Dehydroepiandrosterone         |  |
| 2090 C05 | X | 509    | 520    | -0.80946399 | 631    | 640    | -0.57957882 | 3567573 | 1.10035731   | 3708416 | -1.57081996  |  |  | experimental | BIOMOL | DL-167 |  | Mercopron                      |  |
| 2090 C06 | X | 632    | 640    | -0.441553   | 751    | 520    | -0.88331477 | 2348323 | -2.12259343  | 2165948 | -3.16726354  |  |  | experimental | BIOMOL | DL-154 |  | Desloratadine                  |  |
| 2090 C07 | X | 631    | 640    | -0.44454415 | 511    | 760    | -0.27584287 | 3277199 | 0.33278618   | 3056729 | -0.54576032  |  |  | experimental | BIOMOL | DL     |  |                                |  |



|          |   |       |       |             |       |       |             |          |             |         |             |              |              |        |                                |            |
|----------|---|-------|-------|-------------|-------|-------|-------------|----------|-------------|---------|-------------|--------------|--------------|--------|--------------------------------|------------|
| 2090 D07 | X | 872   | 880   | 0.27632209  | 951   | 960   | 0.23038372  | 2976910  | -0.46099414 | 2950395 | -0.85869349 | experimental | BIOMOL       | T-104  | Taxol                          |            |
| 2090 D08 | X | 751   | 760   | -0.0856066  | 671   | 680   | -0.4783335  | 3618835  | 1.23586266  | 3592898 | 1.03214577  | experimental | BIOMOL       | DL-522 | Toilrazuril                    |            |
| 2090 D09 | X | 512   | 520   | -0.80049055 | 672   | 680   | -0.47580237 | 3679793  | 1.3969983   | 3176006 | -0.19473685 | experimental | BIOMOL       | DL-452 | Myclobutanil                   |            |
| 2090 D10 | X | 470   | 480   | -0.92611869 | 714   | 720   | -0.36946479 | 30640262 | -0.23071276 | 3219022 | -0.09463025 | experimental | BIOMOL       | DL-523 | Tramadol HCl                   |            |
| 2090 D11 | X | 673   | 680   | -0.31891601 | 511   | 520   | -0.89331477 | 3560217  | 1.08091155  | 3414869 | 0.50822606  | experimental | BIOMOL       | DL-453 | Nadifloxacin                   |            |
| 2090 D12 | X | 786   | 800   | 0.01908351  | 707   | 720   | -0.38721272 | 3359127  | 0.54935367  | 3594608 | 1.03717817  | experimental | BIOMOL       | DL-524 | Triamcinolone                  |            |
| 2090 D13 | X | 2909  | 2920  | 0.36928691  | 2669  | 2680  | 4.5788701   | 3349348  | 0.52350397  | 3481941 | 0.70560744  | M            | experimental | BIOMOL | DL-454                         | Nabumetone |
| 2090 D14 | X | 826   | 840   | 0.13872936  | 905   | 920   | 0.1139516   | 3493315  | 0.90406461  | 3181337 | -0.1790481  | experimental | BIOMOL       | DL-525 | Trimethoprim                   |            |
| 2090 D15 | X | 910   | 920   | 0.38998564  | 787   | 800   | -0.18472208 | 3302820  | 0.40051242  | 3259120 | 0.05012643  | experimental | BIOMOL       | DL-455 | Naphazoline HCl                |            |
| 2090 D16 | X | 830   | 840   | 0.15069395  | 1031  | 1040  | 0.43287435  | 3024828  | -0.33432828 | 3260671 | 0.05442605  | experimental | BIOMOL       | DL-518 | Tropisetron HCl                |            |
| 2090 D17 | X | 1110  | 1120  | 0.98821488  | 631   | 640   | -0.57957882 | 3088059  | -0.16718422 | 3163601 | -0.23124385 | experimental | BIOMOL       | DL-456 | Nefazodone                     |            |
| 2090 D18 | X | 709   | 720   | -0.21123475 | 828   | 840   | -0.08094563 | 3605432  | 1.20043333  | 3237449 | -0.01008879 | experimental | BIOMOL       | DL-526 | Tylosin tartrate               |            |
| 2090 D19 | X | 870   | 880   | 0.27033979  | 1386  | 1400  | 1.33142655  | 3428798  | 0.73352115  | 3280557 | 0.12913518  | experimental | BIOMOL       | DL-457 | Niflumic acid                  |            |
| 2090 D20 | X | 670   | 680   | -0.32788945 | 748   | 760   | -0.28343627 | 3217614  | 0.17527991  | 3066693 | -0.516437   | experimental | BIOMOL       | DL-527 | Valaciclovir                   |            |
| 2090 D21 | X | 1111  | 1120  | 0.99120603  | 709   | 720   | -0.38215045 | 3115007  | -0.0959502  | 3325718 | 0.2458546   | experimental | BIOMOL       | DL-458 | Norethindrone                  |            |
| 2090 D22 | X | 790   | 800   | 0.0310481   | 950   | 960   | 0.22785259  | 3668946  | 1.36832547  | 3105063 | -0.4035169  | experimental | BIOMOL       | DL-528 | Acyclovir Br                   |            |
| 2090 D23 | E | 356   | 600   | -1.26710936 | 414   | 640   | -1.12883467 | 93785    | -0.80221198 | 97658   | -9.25408947 | empty        |              |        |                                |            |
| 2090 D24 | P | 81562 | 82120 | 241.63191   | 75412 | 75880 | 188.701073  | 3126305  | -0.0660852  | 3175250 | -0.1969617  | empty        |              |        |                                |            |
| 2090 E01 | N | 596   | 600   | -0.54923427 | 437   | 440   | -1.07061861 | 2594409  | -1.47209267 | 2731170 | -1.5038566  | empty        |              |        |                                |            |
| 2090 E02 | E | 35    | 40    | -2.22726729 | 77    | 80    | -1.98182647 | 92638    | -0.08524395 | 94403   | -9.2636687  | empty        |              |        |                                |            |
| 2090 E03 | X | 754   | 760   | -0.07663317 | 554   | 560   | -0.77447606 | 3488268  | 0.89072343  | 3507259 | 0.78011646  | experimental | BIOMOL       | DL-187 | Rocuronium bromide             |            |
| 2090 E04 | X | 670   | 680   | -0.32788945 | 470   | 480   | -0.98709122 | 2959397  | -0.50728779 | 3127081 | -0.33871954 | experimental | BIOMOL       | DL-181 | Doxofylline                    |            |
| 2090 E05 | X | 987   | 1000  | 0.6203039   | 989   | 1000  | 0.32656677  | 3978658  | 2.18701444  | 3471884 | 0.67601043  | experimental | BIOMOL       | DL-184 | Ricobendazole                  |            |
| 2090 E06 | X | 671   | 680   | -0.3248983  | 910   | 920   | 0.12660727  | 2917152  | -0.61895772 | 3323654 | 0.2397804   | experimental | BIOMOL       | DL-381 | Doxycycline HCl                |            |
| 2090 E07 | X | 592   | 600   | -0.56119885 | 911   | 920   | 0.1291384   | 3463815  | 0.82608666  | 4134475 | 2.6259672   | experimental | BIOMOL       | DL-176 | Sulbactam                      |            |
| 2090 E08 | X | 709   | 720   | -0.14927016 | 752   | 760   | -0.25962217 | 3095435  | -0.14742225 | 3275527 | -0.49932582 | experimental | BIOMOL       | DL-152 | Enalapril                      |            |
| 2090 E09 | X | 553   | 560   | -0.67785555 | 592   | 600   | -0.678293   | 4103970  | 1.51826285  | 3854577 | 1.80224809  | experimental | BIOMOL       | DL-143 | Triamphenicol glycinate        |            |
| 2090 E10 | X | 593   | 600   | -0.55820771 | 590   | 600   | -0.68335527 | 3070702  | -0.2130655  | 3521550 | 0.82217383  | experimental | BIOMOL       | DL-383 | Enoxacin                       |            |
| 2090 E11 | X | 472   | 480   | -0.9201364  | 913   | 920   | 0.13420067  | 3647841  | 1.31253677  | 3221387 | -0.06118389 | experimental | BIOMOL       | DL-175 | Tulobuterol                    |            |
| 2090 E12 | X | 671   | 680   | -0.3248983  | 749   | 760   | -0.28090513 | 3019464  | -0.34850741 | 2875829 | -1.07813576 | experimental | BIOMOL       | DL-384 | Enoxifloxacin                  |            |
| 2090 E13 | X | 1186  | 1200  | 1.215542    | 1585  | 1600  | 1.835122    | 3224886  | 0.19450263  | 3037580 | -0.60211442 | experimental | BIOMOL       | NP-461 | Vinorelbine                    |            |
| 2090 E14 | X | 549   | 560   | -0.68981814 | 825   | 840   | -0.08853903 | 2919433  | -0.61292815 | 2789225 | -1.33300499 | experimental | BIOMOL       | DL-385 | Ethisterone                    |            |
| 2090 E15 | X | 1152  | 1160  | 1.11384302  | 1630  | 1640  | 1.94902298  | 3481253  | 0.87218006  | 3339431 | 0.28621096  | experimental | BIOMOL       | DL-220 | Vindesine                      |            |
| 2090 E16 | X | 592   | 600   | -0.68981814 | 788   | 800   | -0.22149023 | 3021408  | -0.64840514 | 2735655 | -0.80252032 | experimental | BIOMOL       | DL-386 | Gemeprozole potassium          |            |
| 2090 E17 | X | 1030  | 1040  | 0.74892319  | 949   | 440   | -1.08580541 | 3310301  | 0.42028761  | 2763039 | -1.41006847 | experimental | BIOMOL       | DL-210 | Salmeterol                     |            |
| 2090 E18 | X | 788   | 800   | 0.02505681  | 947   | 960   | 0.22025919  | 2987454  | -0.43312226 | 3225085 | -0.05030095 | experimental | BIOMOL       | BL-093 | Estradiol                      |            |
| 2090 E19 | X | 1469  | 1480  | 0.26203637  | 2387  | 2400  | 3.86509061  | 3195010  | 0.11552877  | 3796251 | 1.63059875  | experimental | BIOMOL       | T-117  | Vincristine sulfate            |            |
| 2090 E20 | X | 949   | 960   | 0.50664034  | 1106  | 1120  | 0.62270932  | 3118111  | -0.08774512 | 3044127 | -0.58284708 | experimental | BIOMOL       | DL-388 | Estril                         |            |
| 2090 E21 | X | 868   | 880   | 0.2643575   | 909   | 920   | 0.12407614  | 4004623  | 2.25565     | 3196409 | -0.13469231 | experimental | BIOMOL       | DL-312 | Acemetacin                     |            |
| 2090 E22 | X | 792   | 800   | 0.03703039  | 1109  | 1120  | 0.63030272  | 2901235  | -0.66103252 | 2940137 | -0.88888203 | experimental | BIOMOL       | BL-090 | Estrone                        |            |
| 2090 E23 | X | 520   | 530   | -0.3409991  | 409   | 420   | -0.27311173 | 93966    | -0.0817335  | 2731874 | -9.25250322 | empty        |              |        |                                |            |
| 2090 E24 | P | 81180 | 81680 | 240.489522  | 76914 | 77320 | 192.502835  | 3665072  | 1.35808499  | 3422052 | 0.52938585  | empty        |              |        |                                |            |
| 2090 F01 | N | 515   | 520   | -0.79151711 | 357   | 360   | -1.27310924 | 2912902  | -0.63019212 | 3278393 | 0.10658059  | empty        |              |        |                                |            |
| 2090 F02 | E | 116   | 120   | -1.98498445 | 77    | 80    | -1.98182647 | 87587    | -0.0985957  | 96209   | -9.25835377 | empty        |              |        |                                |            |
| 2090 F03 | X | 713   | 720   | -0.19927016 | 553   | 560   | -0.77007719 | 3073940  | -0.20450621 | 3035271 | -0.60890964 | experimental | BIOMOL       | DL-459 | Norflloxacin                   |            |
| 2090 F04 | X | 951   | 960   | 0.51262264  | 1113  | 1120  | 0.64042726  | 3287783  | 0.3607638   | 3698688 | 1.34347798  | experimental | BIOMOL       | DL-529 | Norfloxacin HCl                |            |
| 2090 F05 | X | 1030  | 1040  | 0.74892319  | 710   | 720   | -0.37961932 | 3217175  | 0.17411946  | 3465903 | 0.65840878  | experimental | BIOMOL       | DL-460 | Nystatin                       |            |
| 2090 F06 | X | 870   | 880   | 0.03033979  | 752   | 760   | -0.27311173 | 93966    | -0.0817335  | 386671  | 0.42523481  | experimental | BIOMOL       | DL-530 | Vidarabine                     |            |
| 2090 F07 | X | 512   | 520   | -0.80049055 | 591   | 600   | -0.68082414 | 3457105  | 0.80083475  | 3310458 | 0.38024640  | experimental | BIOMOL       | DL-461 | Acyclovir                      |            |
| 2090 F08 | X | 513   | 520   | -0.7974994  | 632   | 640   | -0.57704769 | 3647103  | 1.3105895   | 4050983 | 2.38025636  | experimental | BIOMOL       | DL-531 | Iproniazid                     |            |
| 2090 F09 | X | 632   | 640   | -0.441553   | 750   | 760   | -0.278374   | 3334425  | 0.4840567   | 3216777 | -0.07475078 | experimental | BIOMOL       | DL-106 | Tipiraz                        |            |
| 2090 F10 | X | 1032  | 1040  | 0.75490548  | 1072  | 1080  | 0.5366508   | 3847916  | 1.84141261  | 3518665 | 0.81368349  | experimental | BIOMOL       | NA-103 | Benamil                        |            |
| 2090 F11 | X | 832   | 840   | -0.15667624 | 670   | 680   | -0.48086464 | 3403297  | 0.66611211  | 3417886 | 0.51709827  | experimental | BIOMOL       | DL-462 | Omeprazole                     |            |
| 2090 F12 | X | 748   | 760   | -0.09458004 | 946   | 960   | -0.79472512 | 4292524  | 0.301668403 | 3372554 | 0.38368952  | experimental | BIOMOL       | NA-139 | Bupivacaine HCl                |            |
| 2090 F13 | X | 591   | 600   | -0.564419   | 589   | 1000  | 0.32656677  | 3255007  | 0.27412411  | 3107969 | -0.39496475 | experimental | BIOMOL       | DL-463 | Oxcarbazepine                  |            |
| 2090 F14 | X | 632   | 640   | -0.441553   | 869   | 880   | 0.02283082  | 2842293  | -0.81683909 | 2775676 | -1.37287871 | experimental | BIOMOL       | NH-101 | Astemizole                     |            |
| 2090 F15 | X | 831   | 840   | 0.15368509  | 899   | 1000  | 0.32656677  | 3250080  | 0.26110014  | 3135951 | -0.31261578 | experimental | BIOMOL       | DL-464 | Oxiconazole nitrate            |            |
| 2090 F16 | X | 631   | 640   | -0.44454415 | 871   | 880   | 0.02789308  | 3981301  | 2.19400091  | 4025395 | 2.30495275  | experimental | BIOMOL       | NH-106 | Ketotifen fumarate             |            |
| 2090 F17 | X | 831   | 840   | 0.15368509  | 751   | 760   | -0.27584287 | 3123113  | -0.07452289 | 3275772 | 0.09886718  | experimental | BIOMOL       | DL-465 | Oxalicillin sodium monohydrate |            |
| 2090 F18 | X | 871   | 880   | 0.27333094  | 871   | 880   | 0.02789308  | 3458334  | 0.81159625  | 3557861 | 0.92903444  | experimental | BIOMOL       | NH-107 | Levocastastine HCl             |            |
| 2090 F19 | X | 985   | 1000  | 0.61432161  | 903   | 920   | 0.10888934  | 2974744  | -0.46671972 | 3158240 | -0.24702088 | experimental | BIOMOL       | DL-466 | Oxifenazole                    |            |
| 2090 F20 | X | 827   | 840   | 0.14172051  | 868   | 880   | 0.02029969  | 3765517  | 1.62360009  | 3367751 | 0.36955464  | experimental | BIOMOL       | NO-101 | Naloxone HCl                   |            |
| 2090 F21 | X | 1190  | 1200  | 1.22750658  | 752   | 760   | -0.27311173 | 93966    | -0.0817335  | 2539870 | -2.06683849 | experimental | BIOMOL       | DL-467 | Oxibendazole                   |            |
| 2090 F22 | X | 709   | 720   | -0.21123475 | 1190  | 1200  | 0.83532449  | 3632862  | 1.27335867  | 3142404 | -0.29362507 | experimental | BIOMOL       | NO-102 | Naloxonazine 2HCl              |            |
| 2090 F23 | E | 493   | 560   | -0.85732233 | 368   | 560   | -1.24526678 | 93191    | -0.08378215 | 99448   | -9.24882163 | empty        |              |        |                                |            |
| 2090 F24 | P | 89600 | 90120 | 265.674743  | 63317 | 63800 | 158.08702   | 2933336  | -0.57617713 | 2791291 | -1.3269249  | empty        |              |        |                                |            |
| 2090 G01 | N | 837   | 840   | -0.17163197 | 517   | 520   | -0.86812797 | 2812039  | -0.89681215 | 2765325 | -1.40334094 | empty        |              |        |                                |            |
| 2090 G02 | E | 75    | 80    | -2.10762144 | 76    | 80    | -1.9843576  | 90140    | -0.09184713 | 94080   | -9.26461926 | empty        |              |        |                                |            |
| 2090 G03 | X | 593   | 600   | -0.55820771 | 754   | 760   | -0.26824947 | 3377092  | 0.59684213  | 3341793 | 0.29316215  | experimental | BIOMOL       | DL-313 | Acetylsalicylic acid           |            |
| 2090 G04 | X | 750   | 760   | -0.09138989 | 599   | 600   | -0.38215045 | 3123203  | -0.07428489 | 3117488 | 0.22163421  | experimental | BIOMOL       | DL-390 | Acetaminofen 2Na               |            |
| 2090 G05 | X | 550   | 560   | -0.68682699 | 511   | 520   | -0.89331477 | 3911221  | 0.63419056  | 3891055 | 0.78245658  | experimental | BIOMOL       | DL-314 | Acipimox                       |            |
| 2090 G06 | X | 1151  | 1160  | 1.11085188  | 672   | 680   | -0.47580237 | 3280603  | 0.34178427  | 3266235 | 0.07080049  | experimental | BIOMOL       | DL-170 | Ethretinate                    |            |
| 2090 G07 | X | 752   | 760   | -0.08261546 | 793   | 800   | -0.16953528 | 3514276  | 0.95947266  | 3522135 | 0.82389544  | experimental | BIOMOL       | DL-315 | Acedofenac                     |            |
| 2090 G08 | X | 593   | 600   | -0.55       |       |       |             |          |             |         |             |              |              |        |                                |            |

|          |   |        |        |             |        |        |             |          |             |         |               |              |        |         |  |  |                              |
|----------|---|--------|--------|-------------|--------|--------|-------------|----------|-------------|---------|---------------|--------------|--------|---------|--|--|------------------------------|
| 2090 H01 | N | 596    | 600    | -0.54923427 | 516    | 520    | -0.87065911 | 2787156  | -0.96258758 | 2785093 | -1.34516516   | empty        |        |         |  |  |                              |
| 2090 H02 | E | 76     | 80     | -2.10463029 | 75     | 80     | -1.98688873 | 85848    | -8.10319255 | 93053   | -9.26764165   | empty        |        |         |  |  |                              |
| 2090 H03 | X | 712    | 720    | -0.20226131 | 871    | 880    | 0.02789308  | 3134934  | -0.04327541 | 3177339 | -0.19081392   | experimental | BIOMOL | DL-468  |  |  | Pantoprazole                 |
| 2090 H04 | X | 1512   | 1520   | 2.19065566  | 1310   | 1320   | 1.13906044  | 3234447  | 0.21976066  | 3666312 | 1.25707257    | experimental | BIOMOL | AC-1053 |  |  | Harmaline                    |
| 2090 H05 | X | 429    | 440    | -0.04875568 | 871    | 880    | 0.02789308  | 3054506  | -0.25677787 | 3036675 | -0.60477787   | experimental | BIOMOL | NS-109  |  |  | Paroxetine HCl               |
| 2090 H06 | X | 792    | 800    | 0.03703039  | 512    | 520    | -0.88078364 | 3281527  | 0.34422676  | 3677559 | 1.28129689    | experimental | BIOMOL | NS-102  |  |  | Cinanserin                   |
| 2090 H07 | X | 512    | 520    | -0.80049055 | 512    | 520    | -0.88078364 | 3520306  | 0.97541229  | 3486681 | 0.71955692    | experimental | BIOMOL | DL-470  |  |  | Pazufloxacin                 |
| 2090 H08 | X | 473    | 480    | -0.91714525 | 631    | 640    | -0.57957882 | 3594185  | 1.17070315  | 3819524 | 1.69908948    | experimental | BIOMOL | NS-107  |  |  | Dibenzepine HCl              |
| 2090 H09 | X | 714    | 720    | -0.19627901 | 751    | 760    | -0.27584287 | 3532068  | 1.00650382  | 3586428 | 1.01310503    | experimental | BIOMOL | DL-471  |  |  | Pefloxacin mesylate          |
| 2090 H10 | X | 433    | 440    | -1.03679111 | 549    | 560    | -0.78713172 | 3461479  | 0.81990971  | 3142221 | -0.29416363   | experimental | BIOMOL | NS-108  |  |  | Dihydroergocristine mesylate |
| 2090 H11 | X | 393    | 400    | -1.15643695 | 872    | 880    | 0.03042422  | 3590666  | 1.16140106  | 3488818 | 0.72584595    | experimental | BIOMOL | DL-472  |  |  | Penciclovir                  |
| 2090 H12 | X | 827    | 840    | 0.14172051  | 621    | 640    | -0.60489015 | 3291397  | 0.3703117   | 3174968 | -0.19379511   | experimental | BIOMOL | NS-109  |  |  | Fluperlapine                 |
| 2090 H13 | X | 513    | 520    | 0.79749994  | 992    | 1000   | 0.33416017  | 3542089  | 1.03299321  | 3605874 | 1.07033318    | experimental | BIOMOL | DL-473  |  |  | Pentoxifylline               |
| 2090 H14 | X | 552    | 560    | -0.6808447  | 870    | 880    | 0.02536195  | 3039260  | -0.2961789  | 3280565 | 0.11297263    | experimental | BIOMOL | NS-140  |  |  | Fluoxetine HCl               |
| 2090 H15 | X | 591    | 600    | -0.56419    | 671    | 680    | -0.4783335  | 3518042  | 0.96942766  | 3667111 | 1.25054919    | experimental | BIOMOL | DL-474  |  |  | Pencilin v potassium         |
| 2090 H16 | X | 1231   | 1240   | 1.35014358  | 1151   | 1160   | 0.73661031  | 3200056  | 0.1288673   | 3609110 | 1.07985649    | experimental | BIOMOL | NS-145  |  |  | Ondansetron                  |
| 2090 H17 | X | 751    | 760    | -0.0856066  | 990    | 1000   | 0.3290979   | 3379737  | 0.60383389  | 3326986 | 0.24958623    | experimental | BIOMOL | DL-475  |  |  | Phenylbutazone               |
| 2090 H18 | X | 351    | 360    | -1.28206509 | 750    | 760    | -0.278374   | 3081096  | -0.18599013 | 3353004 | 0.3261553     | experimental | BIOMOL | NS-515  |  |  | Ketanserin tartrate          |
| 2090 H19 | X | 748    | 760    | -0.09458004 | 828    | 840    | -0.08094563 | 3728894  | 1.52679129  | 3174968 | -0.1977916    | experimental | BIOMOL | DL-476  |  |  | Piperacilin                  |
| 2090 H20 | X | 1070   | 1080   | 0.86856904  | 870    | 880    | 0.02536195  | 3721128  | 1.50626274  | 3800851 | 1.64413621    | experimental | BIOMOL | DL-562  |  |  | Tiotropium Br                |
| 2090 H21 | X | 788    | 800    | 0.02506581  | 667    | 680    | -0.48845803 | 3195132  | 0.11585126  | 3432894 | 0.56126572    | experimental | BIOMOL | DL-477  |  |  | Pravastatin lactone          |
| 2090 H22 | X | 1191   | 1200   | 1.23049773  | 1191   | 1200   | 0.83785562  | 3055881  | -0.25224315 | 3105235 | -0.40301071   | experimental | BIOMOL | NS-531  |  |  | Mesoridazine besylate        |
| 2090 H23 | E | 390    | 760    | -1.16541039 | 478    | 800    | -0.96684216 | 91849    | -8.08732958 | 97631   | -9.25416893   | empty        |        |         |  |  |                              |
| 2090 H24 | P | 124528 | 125040 | 370.149497  | 108065 | 108600 | 271.350157  | 3563349  | 1.08919164  | 3163429 | 0.23175004    | empty        |        |         |  |  |                              |
| 2090 I01 | N | 597    | 600    | -0.54624312 | 676    | 680    | -0.46567784 | 2782621  | -0.97457534 | 2735246 | -1.49186123   | empty        |        |         |  |  |                              |
| 2090 I02 | E | 36     | 40     | -2.224214   | 75     | 80     | -1.98688873 | 87440    | -8.09898228 | 93543   | -9.27502835   | empty        |        |         |  |  |                              |
| 2090 I03 | X | 473    | 480    | -0.91714525 | 832    | 840    | -0.0708211  | 3399665  | 0.65651133  | 3930786 | 0.2320245     | experimental | BIOMOL | GR-341  |  |  | Amifostine                   |
| 2090 I04 | X | 990    | 1000   | 0.62927734  | 950    | 960    | 0.22785259  | 3034888  | -0.3077358  | 3275166 | 0.09708965    | experimental | BIOMOL | DL-399  |  |  | 5-fluorouracil               |
| 2090 I05 | X | 791    | 800    | 0.03403924  | 711    | 720    | -0.37708818 | 3566588  | 1.09775357  | 4008462 | 2.25512017    | experimental | BIOMOL | DL-324  |  |  | Di-aminoglutethimide         |
| 2090 I06 | X | 791    | 800    | 0.03403924  | 752    | 760    | -0.27331173 | 3116005  | -0.0933121  | 3431712 | 0.55778718    | experimental | BIOMOL | DL-400  |  |  | Flurbiprofen                 |
| 2090 I07 | X | 872    | 880    | 0.27632209  | 870    | 880    | 0.02536195  | 3750292  | 1.58335451  | 4338094 | 3.22520299    | experimental | BIOMOL | DL-325  |  |  | 4-aminosalicylic acid        |
| 2090 I08 | X | 552    | 560    | -0.6808447  | 1151   | 1160   | 0.73661031  | 3703165  | 1.45877956  | 3738487 | 1.46060353    | experimental | BIOMOL | DL-401  |  |  | Floxacin                     |
| 2090 I09 | X | 633    | 640    | -0.43856186 | 748    | 760    | -0.28343627 | 4208616  | 2.79488264  | 3394919 | 0.31560491    | experimental | BIOMOL | DL-326  |  |  | 5-aminosalicylic acid        |
| 2090 I10 | X | 640    | 650    | -0.09462431 | 748    | 760    | -0.09462431 | 4208616  | 2.79488264  | 3394919 | 0.31560491    | experimental | BIOMOL | DL-402  |  |  | Fluorouracil                 |
| 2090 I11 | X | 751    | 760    | -0.0856066  | 703    | 720    | -0.39733725 | 3532306  | 1.00713294  | 3266671 | 0.07208361    | experimental | BIOMOL | DL-327  |  |  | Ampicillin trihydrate        |
| 2090 I12 | X | 1352   | 1360   | 1.71207227  | 2552   | 2560   | 4.28272755  | 3421740  | 0.71486411  | 3051096 | -0.56233782   | experimental | BIOMOL | DL-403  |  |  | Floxuridine                  |
| 2090 I13 | X | 470    | 480    | -0.92611869 | 666    | 680    | -0.49098917 | 3358791  | 0.54846549  | 3616078 | 1.10036281    | experimental | BIOMOL | DL-328  |  |  | Amproxicam                   |
| 2090 I14 | X | 753    | 760    | -0.07962431 | 672    | 680    | -0.47580237 | 3325300  | 0.45993578  | 3363948 | 0.35863269    | experimental | BIOMOL | DL-404  |  |  | Fluocinonone acetonide       |
| 2090 I15 | X | 509    | 520    | -0.80946399 | 432    | 440    | -1.08327427 | 3498261  | 0.9171388   | 3367043 | 0.36747105    | experimental | BIOMOL | DL-329  |  |  | Apramycin                    |
| 2090 I16 | X | 991    | 1000   | 0.63226849  | 792    | 800    | -1.17206642 | 2917548  | -0.61791094 | 2960197 | -0.82984692   | experimental | BIOMOL | DL-405  |  |  | Flubendazole                 |
| 2090 I17 | X | 640    | 650    | -0.09462431 | 549    | 560    | -0.4707401  | 30771798 | -0.47460714 | 3374987 | -0.42447261   | experimental | BIOMOL | NP-015  |  |  | Terminin                     |
| 2090 I18 | X | 873    | 880    | 0.27931323  | 950    | 1000   | 0.33416017  | 3324562  | 0.45798496  | 3420044 | 0.52344911    | experimental | BIOMOL | DL-406  |  |  | Flutamide                    |
| 2090 I19 | X | 831    | 840    | 0.15368509  | 870    | 880    | 0.02536195  | 4054576  | 2.36469769  | 3420453 | 0.52465276    | experimental | BIOMOL | AC-166  |  |  | Atenolol                     |
| 2090 I20 | X | 790    | 800    | 0.0310481   | 910    | 920    | 0.12660727  | 3372571  | 0.58489137  | 3460399 | 0.64221092    | experimental | BIOMOL | DL-407  |  |  | Fluconazole                  |
| 2090 I21 | X | 871    | 880    | 0.27333094  | 831    | 840    | -0.07335223 | 3015262  | -0.35961493 | 3328810 | 0.25495413    | experimental | BIOMOL | DL-332  |  |  | Atorcium besylate            |
| 2090 I22 | P | 669    | 680    | -0.33088059 | 869    | 880    | 0.02283082  | 3118986  | -0.08543216 | 3124354 | -0.34674449   | experimental | BIOMOL | DL-408  |  |  | Formestane                   |
| 2090 I23 | E | 365    | 600    | -1.24018904 | 398    | 680    | -1.16933279 | 92183    | -8.08644669 | 96860   | -9.25643792   | empty        |        |         |  |  |                              |
| 2090 I24 | P | 78229  | 78860  | 231.662449  | 94370  | 95000  | 236.686591  | 3465743  | 0.6338245   | 318072  | -0.38478511   | empty        |        |         |  |  |                              |
| 2090 J01 | N | 355    | 360    | -0.770105   | 636    | 640    | -0.5692315  | 2750933  | -1.0593902  | 2857786 | -1.1079355    | empty        |        |         |  |  |                              |
| 2090 J02 | E | 117    | 120    | -1.9819933  | 75     | 80     | -1.98688873 | 86883    | -8.10045665 | 94163   | -9.264375     | empty        |        |         |  |  |                              |
| 2090 J03 | X | 514    | 520    | -0.79450826 | 674    | 680    | -0.4707401  | 3179594  | 0.0747783   | 3523688 | 0.82846581    | experimental | BIOMOL | DL-478  |  |  | Pranoprofen                  |
| 2090 J04 | X | 632    | 640    | -0.441553   | 632    | 640    | -0.57704769 | 2431922  | -1.90160885 | 2338621 | -2.65909955   | experimental | BIOMOL | NS-835  |  |  | Thioridazine HCl             |
| 2090 J05 | X | 870    | 880    | 0.27033979  | 629    | 640    | -0.58464109 | 3383458  | 0.61366994  | 3288949 | 0.13764613    | experimental | BIOMOL | DL-479  |  |  | Prindolone                   |
| 2090 J06 | X | 631    | 640    | -0.44454415 | 631    | 640    | -0.57957882 | 3327471  | 0.46567458  | 3515347 | 0.80391885    | experimental | BIOMOL | PD-125  |  |  | Clostatone                   |
| 2090 J07 | X | 712    | 720    | -0.20226131 | 1031   | 1040   | 0.43287435  | 3257072  | 0.27958271  | 3667368 | 1.25130552    | experimental | BIOMOL | DL-480  |  |  | Progesterone                 |
| 2090 J08 | X | 754    | 760    | -0.07663317 | 989    | 1000   | 0.32656677  | 3409999  | 0.6838281   | 3701333 | 1.35126203    | experimental | BIOMOL | PD-130  |  |  | Etazolate                    |
| 2090 J09 | X | 512    | 520    | -0.80049055 | 551    | 560    | -0.78206945 | 3828932  | 1.79123053  | 3558573 | 0.93112981    | experimental | BIOMOL | DL-481  |  |  | Procabazine HCl              |
| 2090 J10 | X | 713    | 720    | -0.19927016 | 790    | 800    | -0.17712868 | 3174138  | 0.06035597  | 3610936 | 1.08523028    | experimental | BIOMOL | PD-140  |  |  | Isobutylmethylxanthine       |
| 2090 J11 | X | 673    | 680    | -0.31891601 | 911    | 920    | 0.1291384   | 3185556  | 0.09053818  | 3320108 | 0.22934478    | experimental | BIOMOL | DL-482  |  |  | Prothionamide                |
| 2090 J12 | X | 510    | 520    | -0.80647284 | 546    | 560    | -0.79472512 | 3337282  | 0.49160886  | 3522515 | 0.82501375    | experimental | BIOMOL | PD-141  |  |  | Irsogladine maleate          |
| 2090 J13 | X | 789    | 800    | 0.02805695  | 712    | 720    | -0.37455705 | 3366462  | 0.56874292  | 3450043 | 0.61173397    | experimental | BIOMOL | DL-483  |  |  | Prindolone                   |
| 2090 J14 | X | 949    | 960    | 0.50664034  | 592    | 600    | -0.678293   | 3129889  | -0.0566113  | 3664768 | 1.24365391    | experimental | BIOMOL | PD-152  |  |  | Milrinone                    |
| 2090 J15 | X | 1352   | 1360   | 1.71207227  | 753    | 760    | -0.2707806  | 3381569  | 0.60894092  | 3374987 | 0.39084966    | experimental | BIOMOL | DL-484  |  |  | Prindolone                   |
| 2090 J16 | X | 789    | 800    | 0.02805695  | 591    | 600    | -0.68082414 | 3522942  | 0.9823829   | 3716401 | 1.39550605    | experimental | BIOMOL | PD-175  |  |  | Rolipram                     |
| 2090 J17 | X | 672    | 680    | -0.32190715 | 913    | 920    | 0.13420067  | 2903446  | -0.65518799 | 2868171 | -1.10067227   | experimental | BIOMOL | DL-485  |  |  | Primaquine phosphate         |
| 2090 J18 | X | 712    | 720    | -0.20226131 | 590    | 600    | -0.68335527 | 3412332  | 0.68999512  | 3645382 | 1.18660233    | experimental | BIOMOL | PD-179  |  |  | Siguzadon                    |
| 2090 J19 | X | 591    | 600    | -0.56419    | 829    | 840    | -0.0784145  | 3411388  | 0.68749976  | 3307384 | 0.19189898    | experimental | BIOMOL | DL-486  |  |  | Praziquantel                 |
| 2090 J20 | X | 752    | 760    | -0.08261546 | 951    | 960    | 0.23038372  | 3729145  | 1.52745478  | 3194017 | -0.14173179   | experimental | BIOMOL | DL-487  |  |  | Triquinsin                   |
| 2090 J21 | X | 750    | 760    | -0.08859775 | 789    | 800    | -0.17965982 | 3062886  | -0.23372622 | 3085619 | -0.46073916   | experimental | BIOMOL | DL-480  |  |  | Pyrantel pamoate             |
| 2090 J22 | X | 1111   | 1120   | 0.99120603  | 988    | 1000   | 0.32403564  | 3197745  | 0.12275843  | 3148029 | -0.27707111</ |              |        |         |  |  |                              |

|          |   |        |        |             |        |        |             |         |             |         |              |              |        |             |                                       |
|----------|---|--------|--------|-------------|--------|--------|-------------|---------|-------------|---------|--------------|--------------|--------|-------------|---------------------------------------|
| 2090 K19 | X | 793    | 800    | 0.04002154  | 1431   | 1440   | 1.44532753  | 3448742 | 0.78624088  | 3199231 | -0.12638737  | experimental | BIOMOL | DL-341      | Bupirone HCl                          |
| 2090 K20 | X | 551    | 560    | -0.68383585 | 709    | 720    | -0.38215045 | 3172300 | 0.05549743  | 3393868 | 0.44641506   | experimental | BIOMOL | DL-417      | Guiafenines                           |
| 2090 K21 | X | 832    | 840    | 0.15667624  | 910    | 920    | 0.12660727  | 3183006 | 0.08379754  | 3215822 | -0.07756128  | experimental | BIOMOL | DL-342      | Canrenone                             |
| 2090 K22 | X | 950    | 960    | 0.50963149  | 1550   | 1560   | 1.74652335  | 2861862 | -0.76511064 | 3413610 | 0.52217188   | experimental | BIOMOL | DL-418      | Hexestrol                             |
| 2090 K23 | E | 486    | 840    | -0.8782635  | 486    | 760    | -0.9465931  | 91216   | -0.08900285 | 98497   | -9.25162035  | empty        |        |             |                                       |
| 2090 K24 | P | 119041 | 119600 | 353.730778  | 90941  | 91480  | 228.007037  | 3526498 | 0.99178015  | 3219331 | -0.067233455 | empty        |        |             |                                       |
| 2090 L01 | N | 556    | 560    | -0.66888011 | 476    | 480    | -0.97190442 | 2745271 | -1.07330588 | 3019078 | -0.65656445  | empty        |        |             |                                       |
| 2090 L02 | E | 116    | 120    | -1.98498445 | 155    | 160    | -1.7843981  | 81588   | -8.11445338 | 88360   | -9.2814528   | empty        |        |             |                                       |
| 2090 L03 | X | 794    | 800    | 0.04301268  | 914    | 920    | 0.1367318   | 2043588 | -2.92812626 | 2462239 | -2.92500654  | experimental | BIOMOL | DL-488      | Quinacrine 2HCl dihydrate             |
| 2090 L04 | X | 471    | 480    | -0.92312754 | 711    | 720    | -0.37708818 | 3586152 | 1.14946881  | 3513317 | 0.79794471   | experimental | BIOMOL | PD-190      | Zaprinas                              |
| 2090 L05 | X | 671    | 680    | 0.3248983   | 830    | 840    | -0.07588337 | 2905935 | -0.6486086  | 3009809 | -0.68384244  | experimental | BIOMOL | DL-489      | Quinapril HCl                         |
| 2090 L06 | X | 512    | 520    | -0.80049055 | 593    | 600    | -0.67576187 | 3627394 | 1.25948742  | 3475479 | 0.58659025   | experimental | BIOMOL | PD-195      | Zardaverine                           |
| 2090 L07 | X | 554    | 560    | -0.67486241 | 474    | 480    | -0.97696669 | 3253464 | 0.27004537  | 3289137 | 0.1381994    | experimental | BIOMOL | DL-159      | Racecadotril                          |
| 2090 L08 | X | 554    | 560    | -0.67486241 | 432    | 440    | -1.08327427 | 3411534 | 0.6878857   | 3484147 | 0.71209954   | experimental | BIOMOL | PG-006 PGE1 | Alprostadi                            |
| 2090 L09 | X | 354    | 360    | -1.27309165 | 833    | 840    | -0.06828997 | 2994288 | -0.41505735 | 3151170 | -0.26782737  | experimental | BIOMOL | DL-490      | Ranolazine 2HCl                       |
| 2090 L10 | X | 434    | 440    | -1.03379995 | 631    | 640    | -0.57957882 | 3047139 | -0.27535165 | 3405087 | 0.47943175   | experimental | BIOMOL | PG-051      | Misoprostol                           |
| 2090 L11 | X | 595    | 600    | -0.55222541 | 991    | 1000   | 0.33162904  | 3359296 | 0.5498004   | 3383623 | 0.41626477   | experimental | BIOMOL | DL-491      | Ramipril                              |
| 2090 L12 | X | 474    | 480    | -0.9141541  | 751    | 760    | -0.27584287 | 3080798 | -0.18637786 | 3555930 | 0.92335165   | experimental | BIOMOL | PI-146      | Argatroban                            |
| 2090 L13 | X | 391    | 400    | -1.16241924 | 872    | 880    | 0.03042422  | 3028491 | -0.32464555 | 3219383 | -0.06708151  | experimental | BIOMOL | DL-147      | Rebamipide                            |
| 2090 L14 | X | 352    | 360    | -1.27907394 | 710    | 720    | -0.37961932 | 3806696 | 1.73245216  | 3798224 | 1.63640514   | experimental | BIOMOL | PI-153      | Cilastatin                            |
| 2090 L15 | X | 712    | 720    | -0.20226131 | 1032   | 1040   | 0.43540549  | 3058296 | -0.24585937 | 3114579 | -0.37551201  | experimental | BIOMOL | DL-492      | Ribavirin                             |
| 2090 L16 | X | 752    | 760    | -0.08261546 | 671    | 680    | -0.4783335  | 3568991 | 1.10410563  | 3125725 | -0.34271015  | experimental | BIOMOL | PR-117      | Artresunate                           |
| 2090 L17 | X | 392    | 400    | -1.15942809 | 952    | 960    | 0.23291485  | 2008130 | -3.02185551 | 2231015 | -2.97577612  | experimental | BIOMOL | DL-566      | Nelfinavir Mesylate                   |
| 2090 L18 | X | 713    | 720    | -0.37708818 | 711    | 720    | -0.37708818 | 3744183 | 1.56720605  | 3549258 | 0.90371644   | experimental | BIOMOL | RA-104      | Picotamide                            |
| 2090 L19 | X | 592    | 600    | -0.56119885 | 750    | 760    | -0.278374   | 3201834 | 0.13356275  | 3367556 | 0.3960557    | experimental | BIOMOL | DL-494      | Rimantadine HCl                       |
| 2090 L20 | X | 833    | 840    | 0.15966739  | 872    | 880    | -0.47502337 | 3340940 | -0.29173801 | 334767  | 0.04222498   | experimental | BIOMOL | SI-04       | Condulrot b epoxide                   |
| 2090 L21 | X | 512    | 520    | -0.80049055 | 511    | 520    | -0.8833147  | 2849528 | -0.79774118 | 3138529 | -0.30502895  | experimental | BIOMOL | ST-405      | Proramipid                            |
| 2090 L22 | X | 591    | 600    | -0.56419    | 629    | 640    | -0.58464109 | 3108478 | -0.11320888 | 3521437 | 0.82184128   | experimental | BIOMOL | S-510       | Mifepristone                          |
| 2090 L23 | E | 524    | 800    | -0.76459679 | 490    | 720    | -0.93646856 | 87671   | -8.09837366 | 97436   | -9.2547428   | empty        |        |             |                                       |
| 2090 L24 | P | 92153  | 92960  | 273.311139  | 76528  | 77160  | 191.525818  | 3271195 | 0.31691528  | 2964931 | -0.81591511  | empty        |        |             |                                       |
| 2090 M01 | N | 437    | 440    | -1.02482651 | 637    | 640    | -0.56439202 | 2550999 | -1.58684214 | 2675504 | -1.66767756  | empty        |        |             |                                       |
| 2090 M02 | E | 36     | 40     | -2.2427614  | 116    | 120    | -1.88311228 | 84467   | -8.10684307 | 93295   | -9.26692946  | empty        |        |             |                                       |
| 2090 M03 | X | 792    | 800    | 0.03703039  | 593    | 600    | -0.67576187 | 2740271 | -1.08652282 | 3043216 | -0.58552809  | experimental | BIOMOL | DL-343      | Carbadox                              |
| 2090 M04 | X | 1240   | 1250   | 1.35313472  | 633    | 640    | -0.47502337 | 3049940 | -0.29173801 | 3389582 | 0.056897149  | experimental | BIOMOL | DL-419      | Hydrocotilone                         |
| 2090 M05 | X | 710    | 720    | 0.2082436   | 392    | 400    | -1.18451959 | 2738445 | -1.09134965 | 3183889 | -0.17153775  | experimental | BIOMOL | DL-344      | Carboplatin                           |
| 2090 M06 | X | 753    | 760    | -0.07962431 | 592    | 600    | -0.678293   | 2716534 | -1.14926892 | 3101950 | -0.41267823  | experimental | BIOMOL | DL-420      | Hydrocortisone 21-acetate             |
| 2090 M07 | X | 553    | 560    | -0.67785355 | 594    | 600    | -0.67323074 | 3658507 | 1.34073115  | 3386295 | 0.42412827   | experimental | BIOMOL | DL-345      | Carbamazepine                         |
| 2090 M08 | X | 554    | 560    | -0.67486241 | 472    | 480    | -0.98202896 | 3083819 | -0.17839218 | 3319808 | 0.2284619    | experimental | BIOMOL | DL-421      | 17- hydroxyprogesterone               |
| 2090 M09 | X | 514    | 520    | -0.79450826 | 712    | 720    | -0.37455705 | 3285078 | 0.35361343  | 3432172 | 0.55914092   | experimental | BIOMOL | DL-346      | Cefoperazone acide                    |
| 2090 M10 | X | 875    | 880    | 0.28529553  | 791    | 800    | -0.17459755 | 2912688 | -0.6307578  | 3397413 | 0.45684773   | experimental | BIOMOL | DL-422      | Idoxuridine                           |
| 2090 M11 | X | 460    | 460    | -1.15643695 | 870    | 880    | -0.47502337 | 3161723 | 0.04220912  | 3612260 | 0.17517038   | experimental | BIOMOL | DL-347      | Saralofloxacin acid                   |
| 2090 M12 | X | 354    | 360    | -1.27309165 | 712    | 720    | -0.37455705 | 3088677 | -0.1655506  | 3811292 | -0.179187054 | experimental | BIOMOL | DL-423      | Ifofosamide                           |
| 2090 M13 | X | 474    | 480    | -0.9141541  | 511    | 520    | -0.88331477 | 3152162 | 0.00226488  | 3255800 | 0.04009105   | experimental | BIOMOL | DL-348      | Ceftazidime                           |
| 2090 M14 | X | 993    | 1000   | 0.63825078  | 952    | 960    | 0.23291485  | 3073199 | -0.20646496 | 2953939 | -0.84826376  | experimental | BIOMOL | DL-424      | Inequidam                             |
| 2090 M15 | X | 1031   | 1040   | 0.75191433  | 670    | 680    | -0.48086464 | 3014060 | -0.36279228 | 2803754 | -1.29024721  | experimental | BIOMOL | DL-349      | Chloramphenicol                       |
| 2090 M16 | X | 832    | 840    | 0.15667624  | 553    | 560    | -0.77700719 | 3136870 | -0.03815781 | 3170328 | -0.21144678  | experimental | BIOMOL | DL-425      | Indapamide                            |
| 2090 M17 | X | 552    | 560    | -0.6808447  | 551    | 560    | -0.78206945 | 2974585 | -0.46714002 | 3320674 | 0.23101048   | experimental | BIOMOL | DL-350      | Chlormadinone acetate                 |
| 2090 M18 | X | 729    | 730    | -0.31891695 | 672    | 680    | -0.47502337 | 3040940 | -0.29173801 | 334767  | 0.04222498   | experimental | BIOMOL | DL-426      | Isopride HCl                          |
| 2090 M19 | X | 552    | 560    | -0.6808447  | 871    | 880    | 0.02789308  | 3226142 | 0.19782722  | 3292246 | 0.39224166   | experimental | BIOMOL | DL-427      | Chlorambucil                          |
| 2090 M20 | X | 873    | 880    | 0.27931323  | 952    | 960    | 0.23291485  | 3290529 | 0.36802254  | 3302180 | 0.17658399   | experimental | BIOMOL | DL-427      | Itraconazole                          |
| 2090 M21 | X | 552    | 560    | -0.6808447  | 871    | 880    | 0.02789308  | 3370729 | 0.58002225  | 3134830 | -0.31591478  | experimental | BIOMOL | DL-352      | Chlorpheniramine maleate              |
| 2090 M22 | X | 831    | 840    | 0.15368509  | 1111   | 1120   | 0.63356499  | 2832063 | -0.84388095 | 2914502 | -0.96432396  | experimental | BIOMOL | EI-288      | Ketoprofen (s)                        |
| 2090 M23 | E | 615    | 1080   | -0.49240249 | 546    | 920    | -0.79472512 | 90860   | -8.08994389 | 96200   | -9.25838026  | empty        |        |             |                                       |
| 2090 M24 | P | 157722 | 158240 | 469.437605  | 125519 | 126160 | 315.528551  | 3596710 | 1.17737777  | 3143419 | -0.290638    | empty        |        |             |                                       |
| 2090 N01 | N | 436    | 440    | -1.02781766 | 556    | 560    | -0.76941379 | 2551383 | -1.6850863  | 3096330 | -0.42521748  | empty        |        |             |                                       |
| 2090 N02 | E | 117    | 120    | -1.98199335 | 116    | 120    | -1.88311228 | 82574   | -8.111847   | 90295   | -9.27575824  | empty        |        |             |                                       |
| 2090 N03 | X | 634    | 640    | -0.43557071 | 594    | 600    | -0.67323074 | 2770640 | -1.00624577 | 2894287 | -1.02381522  | experimental | BIOMOL | DL-496      | Roxatidine acetate HCl                |
| 2090 N04 | X | 591    | 600    | -0.56419    | 591    | 600    | -0.68082414 | 2934080 | -0.57421045 | 3064570 | -0.52268483  | experimental | BIOMOL | S-515       | Megestrol acetate                     |
| 2090 N05 | X | 872    | 880    | 0.27632209  | 712    | 720    | -0.37455705 | 3054898 | -0.2548416  | 3242287 | 0.00032328   | experimental | BIOMOL | DL-497      | Roxithromycin                         |
| 2090 N06 | X | 632    | 640    | -0.441553   | 1032   | 1040   | 0.43540549  | 3198494 | 0.12473833  | 3402699 | 0.47240404   | experimental | BIOMOL | S-520       | Melengestrol acetate                  |
| 2090 N07 | X | 553    | 560    | -0.67785355 | 551    | 560    | -0.78206945 | 3229013 | 0.20541189  | 3051040 | -0.56250263  | experimental | BIOMOL | DL-498      | Rufloxacin                            |
| 2090 N08 | X | 514    | 520    | -0.79450826 | 1113   | 1120   | 0.64042726  | 2882335 | -0.71099256 | 3366130 | 0.36478416   | experimental | BIOMOL | S-650       | Tamoxifen citrate                     |
| 2090 N09 | X | 353    | 360    | -1.27608279 | 672    | 680    | -0.68082414 | 3307587 | 0.41131345  | 3368670 | 0.37225919   | experimental | BIOMOL | DL-499      | Saralofloxacin HCl                    |
| 2090 N10 | X | 513    | 520    | -0.79749994 | 753    | 760    | -0.27584287 | 3554624 | 1.06612808  | 3487702 | 0.72256164   | experimental | BIOMOL | DL-532      | Ampranavir                            |
| 2090 N11 | X | 674    | 680    | -0.31592486 | 912    | 920    | 0.13166954  | 3220312 | 0.18241177  | 3189965 | -0.15365653  | experimental | BIOMOL | DL-500      | Scopolamine n-butylbromide            |
| 2090 N12 | X | 589    | 600    | -0.57017229 | 546    | 560    | -0.79472512 | 3387600 | 0.62461885  | 3153217 | -0.2618032   | experimental | BIOMOL | DL-533      | Aprepitant                            |
| 2090 N13 | X | 393    | 400    | -1.15643695 | 513    | 520    | -0.87825251 | 3013769 | -0.36356151 | 3233230 | -0.02633081  | experimental | BIOMOL | DL-501      | Scopolamine HBr                       |
| 2090 N14 | X | 592    | 600    | -0.56119885 | 672    | 680    | -0.4783335  | 3225990 | 0.19742093  | 3174918 | -0.19793875  | experimental | BIOMOL | DL-534      | Bosentan                              |
| 2090 N15 | X | 432    | 440    | -1.03978224 | 1033   | 1040   | 0.43793662  | 3238824 | 0.23134617  | 3607371 | 1.07473874   | experimental | BIOMOL | DL-502      | Secnidazole                           |
| 2090 N16 | X | 551    | 560    | -0.68383585 | 512    | 520    | -0.88331477 | 3364132 | 0.56258382  | 329499  | 0.056897149  | experimental | BIOMOL | DL-535      | Tafaviren                             |
| 2090 N17 | X | 994    | 1000   | 0.64124912  | 753    | 760    | -0.2707806  | 2070114 | -0.21651981 | 3116150 | -0.37088867  | experimental | BIOMOL | DL-503      | Sibutramine HCl                       |
| 2090 N18 | X | 551    | 560    | -0.68383585 | 712    | 720    | -0.37455705 | 2895890 | -0.67516143 | 3124356 | -0.34673901  | experimental | BIOMOL | DL-536      | Taurocholic acid, sodium salt hydrate |
| 2090 N19 | X | 754    | 760    | -0.07663317 | 751    | 760    | -0.27584287 | 3269948 | 0.31361897  | 3184594 | -0.16946299  | experimental | BIOMOL | DL-149      | Sparfloxacin                          |
| 2090 N20 |   |        |        |             |        |        |             |         |             |         |              |              |        |             |                                       |

|          |   |        |        |             |        |        |             |         |             |         |              |              |             |         |                                                        |
|----------|---|--------|--------|-------------|--------|--------|-------------|---------|-------------|---------|--------------|--------------|-------------|---------|--------------------------------------------------------|
| 2090 O13 | X | 707    | 720    | -0.21721704 | 667    | 680    | -0.48845803 | 3078448 | -0.19258982 | 3345981 | 0.30548713   | experimental | BIOMOL      | DL-358  | Climbazole                                             |
| 2090 O14 | X | 793    | 800    | 0.04002154  | 752    | 760    | -0.27331173 | 2831316 | -0.84585556 | 2942921 | -0.88068892  | experimental | BIOMOL      | DL-434  | Lisinopril                                             |
| 2090 O15 | X | 471    | 480    | -0.92312754 | 591    | 600    | -0.68082414 | 3225810 | 0.19694512  | 2989361 | -0.74401941  | experimental | BIOMOL      | DL-359  | Clinafloxacin HCl                                      |
| 2090 O16 | X | 914    | 920    | 0.40195023  | 511    | 520    | -0.86331477 | 2896483 | -0.6735939  | 3062138 | -0.51219035  | experimental | BIOMOL      | DL-435  | Lumefantrone HCl                                       |
| 2090 O17 | X | 551    | 560    | -0.68383585 | 572    | 580    | -0.27331173 | 3216692 | 0.1728427   | 3305453 | -0.18623385  | experimental | BIOMOL      | DL-360  | Clomiphene citrate                                     |
| 2090 O18 | X | 550    | 560    | -0.68682699 | 506    | 520    | -0.89597044 | 2670451 | -1.27108416 | 2961557 | -0.82584454  | experimental | BIOMOL      | DL-436  | Loratadine                                             |
| 2090 O19 | X | 510    | 520    | -0.80647284 | 1030   | 1040   | 0.43034322  | 2892565 | -0.6839507  | 3541419 | 0.88064684   | experimental | BIOMOL      | DL-361  | Clopidol                                               |
| 2090 O20 | X | 913    | 920    | 0.39895908  | 869    | 880    | 0.02283082  | 2955567 | -1.46903163 | 3013266 | -0.67366874  | experimental | BIOMOL      | DL-437  | Lorglumidol                                            |
| 2090 O21 | X | 628    | 640    | -0.45351759 | 630    | 640    | -0.58210995 | 3009457 | -0.37495979 | 3361902 | 0.35234146   | experimental | BIOMOL      | AC-1290 | Clopidogrel sulfate                                    |
| 2090 O22 | X | 1030   | 1040   | 0.74892319  | 1230   | 1240   | 0.93656981  | 2621765 | -1.39978015 | 3184425 | -0.16996305  | experimental | BIOMOL      | DL-438  | Losartan potassium                                     |
| 2090 O23 | E | 683    | 1200   | -0.28904555 | 610    | 920    | -0.63273261 | 89090   | -8.09462269 | 94637   | -9.26298005  | empty        |             |         |                                                        |
| 2090 O24 | P | 175176 | 175880 | 521.645071  | 101871 | 102960 | 255.67232   | 308402  | -0.17156431 | 3188156 | -0.15898029  | empty        |             |         |                                                        |
| 2090 P01 | N | 838    | 840    | 0.17462312  | 1478   | 1480   | 1.56429078  | 2423596 | -1.92361769 | 2485949 | -2.22552404  | empty        |             |         |                                                        |
| 2090 P02 | E | 76     | 80     | -2.10463029 | 114    | 120    | -1.88817455 | 80682   | -8.11684829 | 88339   | -9.2815146   | empty        |             |         |                                                        |
| 2090 P03 | X | 636    | 640    | -0.42958842 | 635    | 640    | -0.56945429 | 2707612 | -1.17285323 | 2834920 | -1.19852795  | experimental | BIOMOL      | DL-505  | Stanozolol                                             |
| 2090 P04 | X | 554    | 560    | -0.67486241 | 993    | 1000   | 0.3366913   | 2868262 | -0.74819295 | 3325455 | 0.24508061   | experimental | BIOMOL      | DL-538  | Methysergide                                           |
| 2090 P05 | X | 1114   | 1120   | 1.00017947  | 752    | 760    | -0.27331173 | 2687979 | -1.22475086 | 3139776 | -0.30135908  | experimental | BIOMOL      | DL-506  | Streptomycin sulfate                                   |
| 2090 P06 | X | 751    | 760    | -0.0856066  | 833    | 840    | -0.06828997 | 3166638 | 0.04053056  | 3165219 | -0.5264822   | experimental | BIOMOL      | DL-107  | Esmolol                                                |
| 2090 P07 | X | 1273   | 1280   | 1.47577172  | 794    | 800    | -0.16700415 | 2752120 | -1.05520132 | 3188156 | -0.15898029  | experimental | BIOMOL      | DL-507  | Sulfadoxime                                            |
| 2090 P08 | X | 913    | 920    | 0.39895908  | 634    | 640    | -0.57198542 | 3165530 | 0.03760169  | 3651862 | 1.2056725    | experimental | BIOMOL      | DL-123  | Pantothenic acid                                       |
| 2090 P09 | X | 594    | 600    | -0.55521656 | 715    | 720    | -0.36696365 | 2759982 | -1.034419   | 2928325 | -0.92364388  | experimental | BIOMOL      | DL-508  | Sulfadiazine                                           |
| 2090 P10 | X | 514    | 520    | -0.79450826 | 715    | 720    | -0.36696365 | 3146872 | -0.01171864 | 3351774 | 0.3225355    | experimental | BIOMOL      | DL-146  | Phloridzin                                             |
| 2090 P11 | X | 875    | 880    | 0.28529553  | 394    | 400    | -1.17945733 | 1997306 | -3.05046754 | 3106187 | -0.40020905  | experimental | BIOMOL      | DL-509  | Sulfamidmethoxine                                      |
| 2090 P12 | X | 468    | 480    | -0.93210098 | 1029   | 1040   | 0.42781209  | 2792696 | -0.94794321 | 3601482 | 1.05740785   | experimental | BIOMOL      | DL-225  | Phenylpropanolamine                                    |
| 2090 P13 | X | 954    | 960    | -0.52159608 | 553    | 560    | -0.77700719 | 2512272 | -1.68921262 | 2856990 | -1.13357756  | experimental | BIOMOL      | DL-510  | Sulfasalazine                                          |
| 2090 P14 | X | 712    | 720    | -0.20226131 | 874    | 880    | -0.47074401 | 3984089 | -0.44201726 | 3658296 | 0.72540066   | experimental | BIOMOL      | DL-234  | Succinylcholine                                        |
| 2090 P15 | X | 955    | 960    | -0.5245822  | 753    | 760    | 0.2707806   | 2827176 | -0.8579149  | 2870702 | -1.09322415  | experimental | BIOMOL      | DL-160  | Tamsulosin HCl                                         |
| 2090 P16 | X | 552    | 560    | -0.6808447  | 1193   | 1200   | 0.84291789  | 2764679 | -1.02200301 | 3315123 | 0.21467429   | experimental | BIOMOL      | DL-195  | Trifluoperidol 2HCl                                    |
| 2090 P17 | X | 792    | 800    | 0.03703039  | 987    | 1000   | 0.32150451  | 2567128 | -1.54420694 | 3099118 | -0.4210126   | experimental | BIOMOL      | DL-511  | Telmisartan                                            |
| 2090 P18 | X | 1673   | 1680   | 2.6722302   | 2432   | 2440   | 3.9789916   | 3006232 | -0.38348472 | 3190351 | -0.15252056  | experimental | BIOMOL      | DL-540  | L-thyroxine [[3-[4-(4-hydroxy-3,5-diiodophenoxy)-3,5-c |
| 2090 P19 | X | 1192   | 1200   | 1.23348887  | 1265   | 1280   | 1.02515946  | 2544984 | -1.60274212 | 2917146 | -0.95654286  | experimental | BIOMOL      | DL-512  | Tenoxicam                                              |
| 2090 P20 | X | 670    | 680    | -0.32788945 | 1592   | 1600   | 1.85283993  | 2300775 | -2.24828124 | 2914207 | -0.96519212  | experimental | BIOMOL      | DL-136  | Cyproheptadine                                         |
| 2090 P21 | X | 1474   | 1480   | 2.07699221  | 670    | 680    | -0.48086464 | 2598358 | -1.46165393 | 2896614 | -1.01696703  | experimental | BIOMOL      | DL-513  | Terazosin HCl                                          |
| 2090 P22 | X | 840    | 840    | 0.15069392  | 1070   | 1070   | 0.15069392  | 3273354 | 0.15069392  | 3273354 | 0.15069392   | experimental | BIOMOL      | DL-513  | Benzydamine                                            |
| 2090 P23 | E | 459    | 920    | -0.9590213  | 922    | 1600   | 0.15698086  | 83161   | -8.11029534 | 93109   | -9.26747684  | empty        |             |         |                                                        |
| 2090 P24 | P | 156688 | 157200 | 466.34476   | 231857 | 232160 | 584.684165  | 2387174 | -2.01989517 | 2679043 | -1.65726254  | empty        |             |         |                                                        |
| 2091 A01 | N | 599    | 600    | 0.34611629  | 398    | 400    | -0.86758332 | 2140856 | 0.72095797  | 1662093 | 0.28651379   | empty        |             |         |                                                        |
| 2091 A02 | E | 116    | 120    | -1.79679885 | 156    | 160    | -1.95228994 | 72419   | -0.91804505 | 72727   | -0.91688629  | empty        |             |         |                                                        |
| 2091 A03 | X | 477    | 480    | -0.19515834 | 556    | 560    | -0.15938643 | 2188608 | 0.75879605  | 1640557 | 0.2702077    | experimental | Microsource | 200046  | Griseofulvin                                           |
| 2091 A04 | X | 552    | 560    | 0.13759245  | 755    | 760    | 0.73258306  | 1994588 | 0.60550708  | 1811811 | 0.39987353   | experimental | Microsource | 1500161 | Carbinopamine maleate                                  |
| 2091 A05 | X | 435    | 440    | -0.28309588 | 436    | 440    | -0.28309588 | 2124130 | 0.7077045   | 1951430 | 0.53086968   | experimental | Microsource | 1500162 | Carbinopamine maleate                                  |
| 2091 A06 | X | 516    | 520    | -0.02212793 | 636    | 640    | 0.19919427  | 2299515 | 0.84667733  | 2301058 | 0.77030926   | experimental | Microsource | 1500162 | Carbinopamine maleate                                  |
| 2091 A07 | X | 436    | 440    | -0.37706211 | 555    | 560    | -0.16386869 | 1868068 | 0.50480425  | 2208192 | 0.6999954    | experimental | Microsource | 210369  | Gallic acid                                            |
| 2091 A08 | X | 596    | 600    | 0.33280626  | 475    | 480    | -0.52244939 | 2266480 | 0.82050082  | 2377976 | 0.82854821   | experimental | Microsource | 1500163 | Cefadroxil                                             |
| 2091 A09 | X | 556    | 560    | 0.15533916  | 596    | 600    | 0.01990392  | 2307627 | 0.85310518  | 2350816 | 0.80798388   | experimental | Microsource | 211468  | Danthron                                               |
| 2091 A10 | X | 475    | 480    | -0.2040317  | 595    | 600    | 0.01542166  | 2130570 | 0.71280748  | 2122128 | 0.63483161   | experimental | Microsource | 1500164 | Cefazolin sodium                                       |
| 2091 A11 | X | 555    | 560    | 0.15090249  | 554    | 560    | -0.16835095 | 2249743 | 0.80723864  | 2709527 | 0.60257604   | experimental | Microsource | 300024  | Hydrocortisone                                         |
| 2091 A12 | X | 709    | 720    | 0.86077085  | 836    | 840    | 0.86077085  | 2055356 | 0.65320887  | 2055356 | 0.60984472   | experimental | Microsource | 1500165 | Hydrocortisone sodium                                  |
| 2091 A13 | X | 475    | 480    | -0.2040317  | 395    | 400    | 0.88103009  | 1953116 | 0.81260471  | 2014553 | 0.5533836471 | experimental | Microsource | 300029  | Desoxycorticosterone acetate                           |
| 2091 A14 | X | 476    | 480    | -0.19959502 | 516    | 520    | -0.33867678 | 1956868 | 0.60592871  | 1958502 | 0.51094136   | experimental | Microsource | 1500166 | Cephalothin sodium                                     |
| 2091 A15 | X | 355    | 360    | -0.73643297 | 395    | 400    | -0.88103009 | 2204723 | 0.77156537  | 1946918 | 0.50217047   | experimental | Microsource | 300034  | Testosterone propionate                                |
| 2091 A16 | X | 635    | 640    | 0.50583667  | 635    | 640    | -0.70173974 | 2427635 | 0.94819798  | 1947431 | 0.50255889   | experimental | Microsource | 1500167 | Cephapirin sodium                                      |
| 2091 A17 | X | 833    | 840    | 1.38429878  | 475    | 480    | 0.37400236  | 2232661 | 0.79370308  | 1931885 | 0.49078816   | experimental | Microsource | 300548  | Sparteine sulfate                                      |
| 2091 A18 | X | 874    | 880    | 1.56620255  | 715    | 720    | 0.55329271  | 2243980 | 0.80267211  | 2152742 | 0.65801115   | experimental | Microsource | 1500168 | Cephadrine                                             |
| 2091 A19 | X | 593    | 600    | 0.31949622  | 474    | 480    | -0.52693165 | 2118280 | 0.70306904  | 2296662 | 0.7669809    | experimental | Microsource | 300607  | Rutroside (rutin)                                      |
| 2091 A20 | X | 994    | 1000   | 2.05860382  | 914    | 920    | 1.44526221  | 1653933 | 0.33512642  | 1926376 | 0.48661699   | experimental | Microsource | 1500169 | Cetylpyridinium chloride                               |
| 2091 A21 | X | 913    | 920    | 0.73923296  | 1153   | 1160   | 2.51652205  | 2214630 | 0.77941555  | 2205624 | 0.69805102   | experimental | Microsource | 300618  | Salicylanilide                                         |
| 2091 A22 | X | 712    | 720    | 0.84746082  | 990    | 1000   | 1.78591387  | 1958804 | 0.5767023   | 2722845 | 1.08966751   | experimental | Microsource | 1500171 | Chlorambucil                                           |
| 2091 A23 | E | 749    | 1160   | 1.01161788  | 805    | 1440   | 0.956696    | 75192   | -0.91584776 | 77869   | -0.91298939  | empty        |             |         |                                                        |
| 2091 A24 | P | 139725 | 140200 | 617.603283  | 216854 | 217280 | 969.344221  | 1639020 | 0.32330955  | 1990096 | 0.53486291   | empty        |             |         |                                                        |
| 2091 B01 | N | 356    | 360    | -0.7319963  | 357    | 360    | -1.05135593 | 1830772 | 0.47525138  | 2322173 | 0.78629669   | empty        |             |         |                                                        |
| 2091 B02 | E | 157    | 160    | -1.61489508 | 277    | 280    | -1.40993663 | 75741   | -0.91541274 | 81765   | -0.91003952  | empty        |             |         |                                                        |
| 2091 B03 | X | 472    | 480    | -0.21734173 | 514    | 520    | -0.3476413  | 2145482 | 0.72462356  | 2685694 | 1.06153844   | experimental | Microsource | 1500263 | Dopamine hydrochloride                                 |
| 2091 B04 | X | 1554   | 1560   | 4.58314311  | 674    | 680    | 0.3695201   | 1455486 | 0.17787955  | 1514845 | 0.17502422   | experimental | Microsource | 1500375 | Mechlorethamine                                        |
| 2091 B05 | X | 472    | 480    | -0.21734173 | 315    | 320    | -1.2396108  | 2195483 | 0.76424371  | 2268676 | 0.74579116   | experimental | Microsource | 1500264 | Doxepin hydrochloride                                  |
| 2091 B06 | X | 355    | 360    | -0.73643297 | 433    | 440    | -0.71070426 | 2231280 | 0.79260879  | 2742432 | 1.10449791   | experimental | Microsource | 1500376 | Mecizline hydrochloride                                |
| 2091 B07 | X | 315    | 320    | -0.91390007 | 433    | 440    | -0.71070426 | 2694921 | 1.15999199  | 3017387 | 1.31268147   | experimental | Microsource | 1500266 | Doxycycline hydrochloride                              |
| 2091 B08 | X | 395    | 400    | -0.55896588 | 594    | 600    | -0.16835095 | 2340518 | 0.87916759  | 2526390 | 0.94092062   | experimental | Microsource | 1500377 | Meclofenamate sodium                                   |
| 2091 B09 | X | 355    | 360    | -0.73643297 | 394    | 400    | -0.88551235 | 2524964 | 1.02532024  | 2482355 | 0.90757269   | experimental | Microsource | 1500267 | Doxylamine succinate                                   |
| 2091 B10 | X | 445    | 450    | -0.38149879 | 554    | 560    | -0.16835095 | 2485424 | 0.99398925  | 2581399 | 1.15823093   | experimental | Microsource | 1500378 | Dicycloxypropionate acetate                            |
| 2091 B11 | X | 475    | 480    | -0.2040317  | 754    | 760    | 0.7281008   | 2269207 | 0.82261417  | 2958871 | 0.726519432  | experimental | Microsource | 1500268 | Dicyclonine hydrochloride                              |
| 2091 B12 | X | 554    | 560    | 0.14646581  | 473    | 480    | -0.53141391 | 2486749 | 0.95039116  | 2708481 | 1.07879173   | experimental | Microsource | 1500380 | Medrysone                                              |
| 2091 B13 | X | 474    | 480    | -0.20846837 | 473    | 480    | -0.52693165 | 2470058 | 0.9818134   |         |              |              |             |         |                                                        |

|          |   |        |        |            |             |        |            |             |            |             |            |             |  |       |              |             |         |  |                                 |
|----------|---|--------|--------|------------|-------------|--------|------------|-------------|------------|-------------|------------|-------------|--|-------|--------------|-------------|---------|--|---------------------------------|
| 2091 C07 | X |        | 556    | 560        | 0.15533916  | 753    | 760        | 0.72361855  | 4734589    | 2.77619882  | 4963859    | 2.78646255  |  |       | experimental | Microsource | 310006  |  | Hydrastinine hydrochloride      |
| 2091 C08 | X |        | 395    | 400        | -0.55896588 | 834    | 840        | 1.08668151  | 2576337    | 1.06602755  | 2740062    | 1.10270345  |  |       | experimental | Microsource | 1500174 |  | Chloramphenicol                 |
| 2091 C09 | X |        | 196    | 200        | -1.44186466 | 194    | 200        | -1.78196411 | 1909231    | -0.11154384 | 1026425    | -0.19478544 |  |       | experimental | Microsource | 310035  |  | Sanguinarine sulfate            |
| 2091 C10 | X |        | 276    | 280        | -1.08693048 | 355    | 360        | -1.06032045 | 2177113    | 0.74669756  | 2314151    | 0.78022279  |  |       | experimental | Microsource | 1500175 |  | Chlorcyclizine hydrochloride    |
| 2091 C11 | X |        | 275    | 280        | -1.09136716 | 194    | 400        | -0.88551235 | 2082442    | 2.254546    | 2445182    | 0.87493584  |  |       | experimental | Microsource | 150039  |  | Alpha-tocopherol                |
| 2091 C12 | X |        | 515    | 520        | -0.02656461 | 434    | 440        | -0.706222   | 2366155    | 0.89484802  | 2298845    | 0.76863377  |  |       | experimental | Microsource | 1500177 |  | Chlorhexidine                   |
| 2091 C13 | X |        | 474    | 480        | -0.20846837 | 475    | 480        | -0.52244939 | 2469030    | 0.98099885  | 2211887    | 0.70279309  |  |       | experimental | Microsource | 310040  |  | Alpha-tocopheryl acetate        |
| 2091 C14 | X |        | 554    | 560        | 0.14646581  | 514    | 520        | -0.3476413  | 2697034    | 1.1616663   | 2325433    | 0.78876501  |  |       | experimental | Microsource | 1500178 |  | Chlorocresol                    |
| 2091 C15 | X |        | 634    | 640        | 0.50139999  | 354    | 364        | -1.0648027  | 2689759    | 1.15590169  | 2627853    | 1.01774384  |  |       | experimental | Microsource | 310050  |  | Quinine ethyl carbonate         |
| 2091 C16 | X |        | 473    | 480        | -0.21290505 | 434    | 440        | -0.706222   | 2479834    | 0.98955988  | 2568723    | 0.97297326  |  |       | experimental | Microsource | 1500179 |  | Chloroquine diphosphate         |
| 2091 C17 | X |        | 673    | 680        | 0.67443041  | 632    | 640        | 0.18126523  | 2377272    | 0.90829099  | 2059636    | 0.97551547  |  |       | experimental | Microsource | 330001  |  | Dactinomycin                    |
| 2091 C18 | X |        | 594    | 600        | 0.3239329   | 914    | 920        | 1.44526221  | 2850799    | 1.28350772  | 263269     | 1.01587821  |  |       | experimental | Microsource | 1500180 |  | Chlorothiazide                  |
| 2091 C19 | X |        | 433    | 440        | -0.39037214 | 393    | 400        | -0.88999461 | 1571403    | 0.2697307   | 1450492    | 0.12629903  |  |       | experimental | Microsource | 330002  |  | Mitomycin c                     |
| 2091 C20 | X |        | 555    | 560        | 0.15090249  | 434    | 440        | -0.706222   | 2874987    | 1.30267399  | 2440252    | 0.8757008   |  |       | experimental | Microsource | 1500181 |  | Chlorocyanisene                 |
| 2091 C21 | X |        | 472    | 480        | -0.21734173 | 632    | 640        | 0.18126523  | 2885295    | 1.31084191  | 2790873    | 1.14117525  |  |       | experimental | Microsource | 330018  |  | Dichlorvos                      |
| 2091 C22 | X |        | 673    | 680        | 0.67443041  | 671    | 680        | 0.35607333  | 2451766    | 0.96731908  | 2690772    | 1.06538328  |  |       | experimental | Microsource | 1500182 |  | Chloroxylenol                   |
| 2091 C23 | E |        | 451    | 760        | -0.31051195 | 774    | 1200       | 0.81774598  | 83193      | -0.90950787 | 84126      | -0.90825188 |  |       | empty        |             |         |  |                                 |
| 2091 C24 | P | 103499 | 104240 | 456.880211 | 143327      | 141460 | 639.777181 | 2374878     | 0.90639401 | 2353348     | 0.80990099 |             |  | empty |              |             |         |  |                                 |
| 2091 D01 | N |        | 276    | 280        | -1.08693048 | 557    | 560        | -0.15490417 | 1921169    | 0.54688808  | 2200656    | 0.69428948  |  |       | empty        |             |         |  |                                 |
| 2091 D02 | E |        | 237    | 240        | -1.2599609  | 156    | 160        | -1.95228994 | 82073      | -0.91039534 | 82431      | -0.90953525 |  |       | empty        |             |         |  |                                 |
| 2091 D03 | X |        | 355    | 360        | -0.73643297 | 435    | 440        | -0.70173974 | 2421193    | 0.94309343  | 2692515    | 1.06874732  |  |       | experimental | Microsource | 1500279 |  | Erythromycin ethylsuccinate     |
| 2091 D04 | X |        | 236    | 240        | -1.26439757 | 554    | 560        | -0.16835095 | 2438778    | 0.95702755  | 2708368    | 1.07870618  |  |       | experimental | Microsource | 1500390 |  | Metaprotenerol                  |
| 2091 D05 | X |        | 316    | 320        | -0.90946339 | 835    | 840        | 1.09116376  | 2285161    | 0.83530341  | 2963366    | 1.2717792   |  |       | experimental | Microsource | 1500280 |  | Erythromycin                    |
| 2091 D06 | X |        | 396    | 400        | -0.5545292  | 433    | 440        | -0.71070426 | 2440131    | 0.95809965  | 2706280    | 1.07712524  |  |       | experimental | Microsource | 1500391 |  | Methacholine chloride           |
| 2091 D07 | X |        | 395    | 400        | -0.55896588 | 354    | 360        | -1.0648027  | 2675281    | 1.14442951  | 2921730    | 1.24025429  |  |       | experimental | Microsource | 1500282 |  | Estradiol                       |
| 2091 D08 | X |        | 520    | 520        | -0.02212793 | 394    | 400        | -0.706222   | 2658631    | 1.13123626  | 3343275    | 1.53262592  |  |       | experimental | Microsource | 1500394 |  | Methamphetamine                 |
| 2091 D09 | X |        | 316    | 320        | -0.90946339 | 395    | 400        | -0.88103009 | 2655572    | 0.04933303  | 3101875    | 0.67507727  |  |       | experimental | Microsource | 1500283 |  | Estradiol cypionate             |
| 2091 D10 | X |        | 396    | 400        | -0.5545292  | 395    | 400        | -0.88103009 | 2664373    | 1.13578615  | 2863248    | 1.19597435  |  |       | experimental | Microsource | 1500295 |  | Methicillin sodium              |
| 2091 D11 | X |        | 436    | 440        | -0.37706211 | 515    | 520        | -0.34315904 | 2531817    | 1.03075047  | 2608833    | 1.00334275  |  |       | experimental | Microsource | 1500284 |  | Estradiol valerate              |
| 2091 D12 | X |        | 395    | 400        | -0.55896588 | 555    | 560        | -0.16386869 | 2642266    | 1.11826884  | 3179433    | 1.43537541  |  |       | experimental | Microsource | 1500396 |  | Methimazole                     |
| 2091 D13 | X |        | 436    | 440        | -0.37706211 | 354    | 360        | -1.0648027  | 2558799    | 1.05213066  | 2677100    | 1.05530145  |  |       | experimental | Microsource | 1500285 |  | Estril                          |
| 2091 D14 | X |        | 275    | 280        | -1.09136716 | 595    | 600        | 0.01542166  | 2651548    | 1.12562378  | 2844062    | 1.18144757  |  |       | experimental | Microsource | 1500397 |  | Methocarbamol                   |
| 2091 D15 | X |        | 514    | 520        | -0.03100128 | 394    | 400        | -0.88551235 | 2990406    | 1.39413053  | 3079921    | 1.3600294   |  |       | experimental | Microsource | 1500286 |  | Estrone                         |
| 2091 D16 | X |        | 640    | 640        | -0.68119281 | 394    | 400        | -0.706222   | 2907738    | 0.6747377   | 3560625    | 0.69548542  |  |       | experimental | Microsource | 1500398 |  | Methoxetate(+/-)                |
| 2091 D17 | X |        | 354    | 360        | -0.74086965 | 993    | 1000       | 1.79936065  | 2688409    | 1.15483197  | 2562130    | 0.96798134  |  |       | experimental | Microsource | 1500287 |  | Acetyric acid                   |
| 2091 D18 | X |        | 434    | 440        | -0.38593547 | 750    | 760        | 0.71017177  | 3056078    | 1.44616818  | 2626213    | 1.0165021   |  |       | experimental | Microsource | 1500399 |  | Methoxamine hydrochloride       |
| 2091 D19 | X |        | 555    | 560        | 0.15090249  | 472    | 480        | -0.53589617 | 2970913    | 1.37868452  | 2693797    | 1.06767367  |  |       | experimental | Microsource | 1500288 |  | Ethambutol hydrochloride        |
| 2091 D20 | X |        | 473    | 480        | -0.21290505 | 512    | 520        | -0.35660582 | 3138579    | 1.51154091  | 2625887    | 1.01625527  |  |       | experimental | Microsource | 1500400 |  | Methoxsalen                     |
| 2091 D21 | X |        | 834    | 840        | 1.38873545  | 953    | 960        | 1.62007073  | 2745233    | 1.19985858  | 2532040    | 0.94519854  |  |       | experimental | Microsource | 1500291 |  | Ethyl estradiol                 |
| 2091 D22 | X |        | 472    | 480        | -0.21734173 | 630    | 640        | 0.17230072  | 2854303    | 1.28628425  | 2477692    | 0.90404868  |  |       | experimental | Microsource | 1500401 |  | Methscopolamine bromide         |
| 2091 D23 | E |        | 367    | 640        | -0.68119281 | 394    | 400        | -0.706222   | 2907738    | 0.6747377   | 3560625    | 0.69548542  |  |       | empty        |             |         |  |                                 |
| 2091 D24 | P | 91712  | 92280  | 404.585095 | 139925      | 140720 | 624.528536 | 2393162     | 0.92088022 | 2353812     | 0.90568022 |             |  | empty |              |             |         |  |                                 |
| 2091 E01 | N |        | 398    | 400        | -0.54565585 | 357    | 360        | -1.05135593 | 3160825    | 1.52916836  | 2093616    | 0.6132436   |  |       | empty        |             |         |  |                                 |
| 2091 E02 | E |        | 156    | 160        | -1.61933176 | 157    | 160        | -1.94780768 | 84613      | -0.90838268 | 87326      | -0.90582898 |  |       | empty        |             |         |  |                                 |
| 2091 E03 | X |        | 636    | 640        | 0.51027335  | 436    | 440        | -0.69725749 | 3346199    | 1.67605635  | 2323515    | 0.78731279  |  |       | experimental | Microsource | 330062  |  | Temefos                         |
| 2091 E04 | X |        | 394    | 400        | -0.56340256 | 314    | 320        | -1.24409306 | 2969415    | 1.37749753  | 2099967    | 0.61737085  |  |       | experimental | Microsource | 1500183 |  | Chlorpheniramine (s) maleate    |
| 2091 E05 | X |        | 476    | 480        | -0.19959502 | 395    | 400        | -0.88103009 | 3291678    | 1.6328546   | 2766403    | 1.2264767   |  |       | experimental | Microsource | 330071  |  | Lindane                         |
| 2091 E06 | X |        | 355    | 360        | -0.73643297 | 394    | 400        | -0.88551235 | 2083926    | 0.6747377   | 2742745    | 0.55920772  |  |       | experimental | Microsource | 3500184 |  | Methylpromazine                 |
| 2091 E07 | X |        | 366    | 360        | -0.7319963  | 393    | 600        | -0.00647810 | 2863451    | 1.29353303  | 3040816    | 1.12647053  |  |       | experimental | Microsource | 1500382 |  | Mitomycin                       |
| 2091 E08 | X |        | 395    | 400        | -0.55896588 | 514    | 520        | -0.3476413  | 2664988    | 1.13627346  | 2693012    | 1.0670793   |  |       | experimental | Microsource | 1500185 |  | Chlorpropamide                  |
| 2091 E09 | X |        | 395    | 400        | -0.55896588 | 514    | 520        | -0.3476413  | 2614471    | 1.09624444  | 2561064    | 0.96717421  |  |       | experimental | Microsource | 330086  |  | Dibutyl phthalate               |
| 2091 E10 | X |        | 475    | 480        | -0.2040317  | 515    | 520        | -0.34315904 | 2687280    | 1.15393736  | 2364844    | 0.81860525  |  |       | experimental | Microsource | 1500186 |  | Chlortetracycline hydrochloride |
| 2091 E11 | X |        | 395    | 400        | -0.55896588 | 394    | 400        | -0.88551235 | 2742747    | 1.1978887   | 2610265    | 1.004427    |  |       | experimental | Microsource | 1300027 |  | Ivermectin                      |
| 2091 E12 | X |        | 356    | 360        | -0.7319963  | 434    | 440        | -0.706222   | 2724284    | 1.18325886  | 2009271    | 0.54938136  |  |       | experimental | Microsource | 1500187 |  | Chlorthalidone                  |
| 2091 E13 | X |        | 315    | 320        | -0.91390007 | 435    | 440        | -0.70173974 | 2623541    | 1.10343139  | 2425837    | 0.86478641  |  |       | experimental | Microsource | 1500037 |  | Sodium nitroprusside            |
| 2091 E14 | X |        | 355    | 360        | -0.73643297 | 393    | 400        | -0.88999461 | 2807032    | 1.24882731  | 2432363    | 0.8697276   |  |       | experimental | Microsource | 1500188 |  | Chlorzoxazone                   |
| 2091 E15 | X |        | 714    | 720        | 0.85633418  | 714    | 720        | 0.54881045  | 3044909    | 1.43731801  | 2668253    | 1.0483329   |  |       | experimental | Microsource | 1300038 |  | Sodium oxybate                  |
| 2091 E16 | X |        | 674    | 680        | 0.67886709  | 673    | 680        | 0.36503784  | 2572939    | 1.06333501  | 2561639    | 0.96760957  |  |       | experimental | Microsource | 1500189 |  | Ciclopirox olamine              |
| 2091 E17 | X |        | 513    | 520        | -0.03543796 | 550    | 560        | -0.18627999 | 3218421    | 1.57480669  | 2793701    | 1.14331649  |  |       | experimental | Microsource | 1400151 |  | Ethyl paraben                   |
| 2091 E18 | X |        | 715    | 720        | 0.86077085  | 992    | 1000       | 1.79487839  | 2900492    | 1.32288382  | 2764079    | 1.12088804  |  |       | experimental | Microsource | 1500190 |  | Cinoxacin                       |
| 2091 E19 | X |        | 433    | 440        | -0.39037214 | 909    | 920        | 1.42285091  | 2704093    | 1.16725977  | 2746199    | 1.10735011  |  |       | experimental | Microsource | 1400208 |  | Coumarin                        |
| 2091 E20 | X |        | 554    | 560        | 0.14646581  | 793    | 800        | 0.9029089   | 2202395    | 0.76972069  | 2509096    | 0.92782638  |  |       | experimental | Microsource | 1500191 |  | Clemastine                      |
| 2091 E21 | X |        | 593    | 600        | 0.31949622  | 470    | 480        | -0.54486569 | 2488676    | 0.99565609  | 3648586    | 1.79059697  |  |       | experimental | Microsource | 1600716 |  | 2,6-di-t-butyl-4-methylphenol   |
| 2091 E22 | X |        | 552    | 560        | 0.13759245  | 711    | 720        | 0.53536368  | 2565008    | 1.05705059  | 2809720    | 1.15544535  |  |       | experimental | Microsource | 1500192 |  | Clidinium bromide               |
| 2091 E23 | E |        | 450    | 720        | -0.31494863 | 777    | 1160       | 0.83119276  | 84937      | -0.90812594 | 88579      | -0.90488026 |  |       | empty        |             |         |  |                                 |
| 2091 E24 | P | 96068  | 91240  | 399.687004 | 128912      | 129640 | 575.16542  | 2579489     | 1.06852515 | 2818796     | 1.16231729 |             |  | empty |              |             |         |  |                                 |
| 2091 F01 | N |        | 317    | 320        | -0.90502671 | 477    | 480        | -0.51348488 | 215187     |             |            |             |  |       |              |             |         |  |                                 |

|          |   |        |        |             |        |        |             |         |             |         |             |              |             |         |                              |
|----------|---|--------|--------|-------------|--------|--------|-------------|---------|-------------|---------|-------------|--------------|-------------|---------|------------------------------|
| 2091 G01 | N | 477    | 480    | -0.19515834 | 437    | 440    | -0.69277523 | 2859219 | 1.29017962  | 2162909 | 0.66570915  | empty        |             |         |                              |
| 2091 G02 | E | 197    | 200    | -1.43742799 | 196    | 200    | -1.77299959 | 82298   | -0.91021705 | 85132   | -0.90749018 | empty        |             |         |                              |
| 2091 G03 | X | 396    | 400    | -0.5545292  | 316    | 320    | -1.23512854 | 3375473 | 1.69925269  | 2027323 | 0.56304952  | experimental | Microsource | 1500101 | Acetaminophen                |
| 2091 G04 | X | 275    | 280    | -1.09136718 | 434    | 440    | -0.706222   | 2876378 | 1.3037762   | 216403  | 0.55478139  | experimental | Microsource | 1500193 | Clindamycin hydrochloride    |
| 2091 G05 | X | 396    | 400    | -0.5545292  | 316    | 320    | -1.23512854 | 3375473 | 1.69925269  | 2027323 | 0.56304952  | experimental | Microsource | 1500102 | Acetazolamide                |
| 2091 G06 | X | 395    | 400    | -0.55896588 | 514    | 520    | -0.3476413  | 3047046 | 1.43901134  | 3238059 | 1.47976439  | experimental | Microsource | 1500196 | Clomiphene citrate           |
| 2091 G07 | X | 436    | 440    | -0.37706211 | 712    | 720    | 0.53984594  | 3060006 | 1.44928067  | 3042208 | 1.33147481  | experimental | Microsource | 1500103 | Acetohydroxamic acid         |
| 2091 G08 | X | 395    | 400    | -0.55896588 | 514    | 480    | -0.53141391 | 2835021 | 1.27100544  | 2735169 | 1.09899869  | experimental | Microsource | 1500198 | Clonidine hydrochloride      |
| 2091 G09 | X | 476    | 480    | -0.19959502 | 473    | 520    | -0.3476413  | 2746350 | 1.20074367  | 2558868 | 0.9655115   | experimental | Microsource | 1500104 | Acetylcholine                |
| 2091 G10 | X | 395    | 400    | -0.55896588 | 514    | 480    | -0.52693165 | 2613678 | 1.09561608  | 2693370 | 1.06735036  | experimental | Microsource | 1500200 | Clotrimazole                 |
| 2091 G11 | X | 275    | 280    | -1.09136718 | 434    | 560    | -0.16835095 | 2955225 | 1.36625355  | 2409384 | 0.85232893  | experimental | Microsource | 1500105 | Acetylcysteine               |
| 2091 G12 | X | 474    | 480    | -0.20846837 | 394    | 400    | -0.88551235 | 2399528 | 0.92592636  | 262623  | 1.01335234  | experimental | Microsource | 1500201 | Cloxacillin sodium           |
| 2091 G13 | X | 755    | 760    | 1.03823795  | 434    | 440    | -0.706222   | 2529248 | 1.02871482  | 2336877 | 0.79742989  | experimental | Microsource | 1500107 | Adenosine                    |
| 2091 G14 | X | 474    | 480    | -0.20846837 | 394    | 720    | 0.54432819  | 2609397 | 1.09222387  | 2133649 | 0.64355479  | experimental | Microsource | 1500202 | Cloxyquin                    |
| 2091 G15 | X | 512    | 520    | -0.03987464 | 551    | 560    | -0.18179773 | 3008974 | 1.40884357  | 2689737 | 1.06459962  | experimental | Microsource | 1500108 | Allopurinol                  |
| 2091 G16 | X | 1274   | 1280   | 3.34087347  | 1114   | 1120   | 2.34171396  | 2490506 | 0.99801616  | 2420489 | 0.86073714  | experimental | Microsource | 1500205 | Colchicine                   |
| 2091 G17 | X | 752    | 760    | 1.02492792  | 550    | 560    | -0.18627999 | 2389044 | 0.91761897  | 2726910 | 1.092274534 | experimental | Microsource | 1500109 | Alverine citrate             |
| 2091 G18 | X | 514    | 520    | -0.03101028 | 553    | 560    | -0.17283321 | 2409104 | 0.93351426  | 2834897 | 1.17450825  | experimental | Microsource | 1500206 | Colistimethate sodium        |
| 2091 G19 | X | 514    | 520    | -0.03101028 | 710    | 720    | 0.53088142  | 2533175 | 1.16032653  | 2299160 | 0.84458778  | experimental | Microsource | 1500110 | Amantadine hydrochloride     |
| 2091 G20 | X | 554    | 560    | 0.14646581  | 833    | 840    | 1.08219925  | 2344061 | 0.88197501  | 2687773 | 1.06311257  | experimental | Microsource | 1500207 | Cortisone acetate            |
| 2091 G21 | X | 633    | 640    | 0.49696332  | 631    | 640    | 0.17678298  | 2481928 | 0.99121906  | 2443436 | 0.87811158  | experimental | Microsource | 1500111 | Amikacin sulfate             |
| 2091 G22 | X | 431    | 440    | -0.3992455  | 711    | 720    | 0.53536368  | 2324597 | 0.86655199  | 2568926 | 0.97312696  | experimental | Microsource | 1500208 | Cotinine                     |
| 2091 G23 | E | 613    | 920    | 0.40822977  | 481    | 840    | -0.49555584 | 83725   | -0.90908632 | 86067   | -0.90678224 | empty        |             |         |                              |
| 2091 G24 | P | 103219 | 103920 | 55.637941   | 120591 | 121320 | 57.868545   | 2454056 | 0.96913365  | 2400126 | 0.84531919  | empty        |             |         |                              |
| 2091 H01 | N | 357    | 360    | -0.72755962 | 436    | 440    | -0.69275479 | 2056364 | 0.65400759  | 2443283 | 0.87799573  | empty        |             |         |                              |
| 2091 H02 | E | 157    | 160    | -1.41480908 | 236    | 236    | -1.59370924 | 77942   | -0.91365869 | 81782   | -0.90302665 | empty        |             |         |                              |
| 2091 H03 | X | 360    | 360    | -0.72755962 | 515    | 520    | -0.34315904 | 2470033 | 0.88019362  | 2602340 | 0.99856344  | experimental | Microsource | 1500309 | Furazolidone                 |
| 2091 H04 | X | 315    | 320    | -0.91390007 | 874    | 880    | 1.26597186  | 2605343 | 1.08901153  | 2870232 | 1.20126232  | experimental | Microsource | 1500418 | Moxalactam disodium          |
| 2091 H05 | X | 436    | 440    | -0.37706211 | 553    | 560    | -0.17283321 | 2434167 | 0.95337386  | 2972468 | 1.27867082  | experimental | Microsource | 1500310 | Furosemide                   |
| 2091 H06 | X | 436    | 440    | -0.37706211 | 433    | 440    | -0.71070426 | 2775249 | 1.22364287  | 3018134 | 1.31324706  | experimental | Microsource | 1500419 | Nadide                       |
| 2091 H07 | X | 315    | 320    | -0.91390007 | 633    | 640    | 0.18574749  | 2494116 | 1.00087668  | 2868070 | 1.19866906  | experimental | Microsource | 1500311 | Fusidic acid                 |
| 2091 H08 | X | 396    | 400    | -0.5545292  | 554    | 560    | -0.16835095 | 2953940 | 1.36523533  | 3153579 | 1.41579993  | experimental | Microsource | 1500420 | Nafcillin sodium             |
| 2091 H09 | X | 235    | 240    | -1.26883425 | 434    | 440    | -0.706222   | 2552984 | 1.04752293  | 3109728 | 1.38259792  | experimental | Microsource | 1500312 | Gallamine triethiodide       |
| 2091 H10 | X | 474    | 480    | -0.20846837 | 474    | 560    | -0.49746142 | 2594966 | 1.27009656  | 2700966 | 0.93439848  | experimental | Microsource | 1500421 | Minoxidil hydrochloride      |
| 2091 H11 | X | 395    | 400    | -0.55896588 | 473    | 480    | -0.52693165 | 2499902 | 1.00546143  | 2861428 | 1.19459633  | experimental | Microsource | 1500313 | Gemfibrozil                  |
| 2091 H12 | X | 474    | 480    | -0.20846837 | 475    | 480    | -0.52244939 | 2724014 | 1.18304491  | 2804802 | 1.15172167  | experimental | Microsource | 1500425 | Naproxen(+)                  |
| 2091 H13 | X | 474    | 480    | -0.20846837 | 554    | 560    | -0.16835095 | 2422785 | 0.94435491  | 2763283 | 1.12028535  | experimental | Microsource | 1500314 | Gentamicin sulfate           |
| 2091 H14 | X | 394    | 400    | -0.56340256 | 713    | 720    | 0.54432819  | 2665019 | 1.13629803  | 2908417 | 1.23017428  | experimental | Microsource | 1500427 | Neomycin sulfate             |
| 2091 H15 | X | 434    | 440    | -0.38593547 | 634    | 640    | 0.19022975  | 1470801 | 0.19001496  | 1392665 | 0.08251502  | experimental | Microsource | 1500315 | Gentian violet               |
| 2091 H16 | X | 512    | 520    | -0.03987464 | 512    | 520    | -0.35660582 | 2734079 | 1.19102029  | 2754206 | 1.11341265  | experimental | Microsource | 1500433 | Nitrofurantoin               |
| 2091 H17 | X | 474    | 480    | -0.20846837 | 754    | 760    | -0.72810704 | 2784921 | 1.09948111  | 2879561 | 0.38162699  | experimental | Microsource | 1500435 | Netilmicin hydrochloride     |
| 2091 H18 | X | 394    | 400    | -0.56340256 | 473    | 480    | -0.53141391 | 2510067 | 1.01351605  | 2909082 | 1.23067739  | experimental | Microsource | 1500428 | Netogistamine bromide        |
| 2091 H19 | X | 275    | 280    | -1.09136718 | 392    | 400    | -0.89447687 | 1369565 | 0.10979685  | 1301384 | 0.01340115  | experimental | Microsource | 1500319 | Grammidin                    |
| 2091 H20 | X | 313    | 320    | -0.92277342 | 633    | 640    | 0.18574749  | 2547497 | 1.0431751   | 2779781 | 1.13277689  | experimental | Microsource | 1500431 | Nifedipine                   |
| 2091 H21 | X | 953    | 960    | 1.91670005  | 552    | 560    | -0.17731547 | 2445265 | 0.96216777  | 2612993 | 1.00649251  | experimental | Microsource | 1500321 | Guaifenesin                  |
| 2091 H22 | X | 752    | 760    | 1.02492792  | 749    | 760    | 0.70568951  | 2380232 | 0.91063645  | 2949234 | 1.26107908  | experimental | Microsource | 1500430 | Niacin                       |
| 2091 H23 | E | 498    | 840    | -0.10198812 | 663    | 1080   | 0.32021526  | 83914   | -0.90893656 | 84646   | -0.90785815 | empty        |             |         |                              |
| 2091 H24 | P | 115170 | 115760 | 508.606671  | 140427 | 141240 | 526.79863   | 2291913 | 0.84041589  | 217776  | 0.93439848  | empty        |             |         |                              |
| 2091 I01 | N | 437    | 440    | -0.37262543 | 637    | 640    | 0.2036753   | 2818866 | 1.25808922  | 2162800 | 0.65656344  | empty        |             |         |                              |
| 2091 I02 | E | 117    | 120    | -1.79236217 | 116    | 120    | -2.13158029 | 80023   | -0.91201974 | 83023   | -0.90908702 | empty        |             |         |                              |
| 2091 I03 | X | 117    | 320    | -0.90502671 | 435    | 440    | -0.70173974 | 3334034 | 1.66641696  | 2166646 | 0.67005294  | experimental | Microsource | 1500112 | Amiloride hydrochloride      |
| 2091 I04 | X | 476    | 480    | -0.19959502 | 552    | 560    | -0.17731547 | 2913516 | 1.33320387  | 2376842 | 0.82768959  | experimental | Microsource | 1500209 | Cresol                       |
| 2091 I05 | X | 275    | 280    | -1.09136718 | 633    | 640    | 0.18574749  | 3112878 | 1.49117577  | 2425853 | 0.86479852  | experimental | Microsource | 1500113 | Potassium p-aminobenzoate    |
| 2091 I06 | X | 356    | 360    | -0.7319963  | 713    | 720    | 0.54432819  | 2808038 | 1.24962445  | 2980230 | 1.28454786  | experimental | Microsource | 1500210 | Cromolyn sodium              |
| 2091 I07 | X | 355    | 360    | -0.73643297 | 793    | 800    | 0.9029089   | 2759886 | 1.21146943  | 2724151 | 1.09065635  | experimental | Microsource | 1500114 | Aminocaproic acid            |
| 2091 I08 | X | 556    | 560    | 0.15533916  | 513    | 520    | -0.35212356 | 2694969 | 1.16003003  | 3019061 | 1.31394895  | experimental | Microsource | 1500211 | Cyclizine                    |
| 2091 I09 | X | 355    | 360    | -0.73643297 | 474    | 440    | -0.706222   | 2715781 | 1.17652119  | 2735492 | 1.09924325  | experimental | Microsource | 1500115 | Aminoglutethimide            |
| 2091 I10 | X | 395    | 400    | -0.55896588 | 594    | 600    | 0.0109394   | 2481777 | 0.99109941  | 2812276 | 1.15738064  | experimental | Microsource | 1500212 | Cyclopentolate hydrochloride |
| 2091 I11 | X | 434    | 440    | -0.38593547 | 674    | 680    | 0.3695201   | 2786619 | 1.23265231  | 2548600 | 0.95773703  | experimental | Microsource | 1500116 | Aminosalicylate sodium       |
| 2091 I12 | X | 675    | 680    | 0.68330376  | 434    | 440    | -0.706222   | 2503797 | 1.00854778  | 2621098 | 1.01262926  | experimental | Microsource | 1500213 | Cyclophosphamide hydrate     |
| 2091 I13 | X | 394    | 400    | -0.56340256 | 434    | 440    | -0.706222   | 2357879 | 0.89292422  | 2599534 | 0.99630196  | experimental | Microsource | 1500117 | Amitriptyline hydrochloride  |
| 2091 I14 | X | 595    | 600    | 0.32836958  | 434    | 440    | -0.706222   | 2413995 | 0.93738982  | 2521704 | 0.93737259  | experimental | Microsource | 1500215 | Cycloserine                  |
| 2091 I15 | X | 553    | 560    | 0.14202913  | 354    | 360    | -1.0648027  | 1765296 | 0.42461642  | 1692351 | 0.30842379  | experimental | Microsource | 1500119 | Amiodiaquine dihydrochloride |
| 2091 I16 | X | 513    | 520    | -0.03543796 | 354    | 360    | -1.0648027  | 2322232 | 1.02315544  | 2474116 | 0.90134109  | experimental | Microsource | 1500216 | Cyproterone acetate          |
| 2091 I17 | X | 553    | 560    | 0.14202913  | 473    | 480    | -0.53141391 | 2453011 | 0.96830556  | 2549556 | 0.95573511  | experimental | Microsource | 1500120 | Amoxicillin                  |
| 2091 I18 | X | 914    | 920    | 1.74366964  | 793    | 800    | 0.9029089   | 2746309 | 0.98676664  | 2341132 | 0.80065159  | experimental | Microsource | 1500217 | Cytarabine                   |
| 2091 I19 | X | 593    | 600    | 0.31949622  | 873    | 880    | 1.2614896   | 2504116 | 1.00880055  | 2563192 | 0.96878544  | experimental | Microsource | 1500122 | Amphotericin b               |
| 2091 I20 | X | 674    | 680    | 0.67886709  | 632    | 640    | 0.18126523  | 2294476 | 0.82468445  | 2701293 | 1.0733493   | experimental | Microsource | 1500218 | Oracarbazine                 |
| 2091 I21 | X | 592    | 600    | 0.31505955  | 710    | 720    | 0.53088142  | 2518377 | 1.02010078  | 2586075 | 0.98611442  | experimental | Microsource | 1500123 | Ampicillin sodium            |
| 2091 I22 | X | 474    | 480    | -0.03987464 | 1349   | 1360   | -0.39504477 | 2198645 | 0.76474924  | 2174374 | 0.89396489  | experimental | Microsource | 1500220 | Danzol                       |
| 2091 I23 | X | 467    | 760    | -0.23952512 | 770    | 1240   | 0.79981694  | 85919   | -0.90734782 | 86592   | -0.90638473 | empty        |             |         |                              |
| 2091 I24 | P | 98487  | 99080  | 434.643584  | 157610 | 158480 | 703.797283  | 2346142 | 0.88362397  | 2688657 | 1.06378189  | empty        |             |         |                              |
| 2091 J01 | N | 717    | 720    | 0.86964421  | 556    | 560    | -0.15938643 | 2186610 | 0.75721286  | 2404883 | 0.84892098  |              |             |         |                              |

|          |   |        |        |             |        |        |             |            |             |           |             |              |             |         |                                |
|----------|---|--------|--------|-------------|--------|--------|-------------|------------|-------------|-----------|-------------|--------------|-------------|---------|--------------------------------|
| 2091 J19 | X | 474    | 480    | -0.20846837 | 553    | 560    | -0.17283321 | 2393658    | 0.92127504  | 2624584   | 1.0152687   | experimental | Microsource | 1500332 | Homatropine bromide            |
| 2091 J20 | X | 513    | 520    | -0.03543796 | 632    | 640    | 0.18126523  | 2211814    | 0.77718418  | 2412445   | 0.85464659  | experimental | Microsource | 1500442 | Nortriptyline                  |
| 2091 J21 | X | 673    | 680    | 0.67443041  | 870    | 880    | 1.24804282  | 2410055    | 0.93426782  | 2690422   | 1.06511827  | experimental | Microsource | 1500333 | Homatropine methylbromide      |
| 2091 J22 | X | 472    | 480    | -0.21734173 | 1187   | 1200   | 2.66891885  | 2079837    | 0.6726073   | 2173790   | 0.63881572  | experimental | Microsource | 1500443 | Noscapine hydrochloride        |
| 2091 J23 | E | 458    | 720    | -0.27945521 | 812    | 1280   | 0.98807181  | 82191      | -0.0303184  | 84435     | -0.90801791 | empty        |             |         |                                |
| 2091 J24 | P | 87580  | 88200  | 386.252745  | 157111 | 157960 | 701.560636  | 2191852    | 0.76136655  | 2710608   | 1.0804022   | empty        |             |         |                                |
| 2091 K01 | N | 516    | 520    | -0.02212793 | 596    | 600    | 0.01990392  | 3438818    | 1.74944646  | 1994156   | 0.53793696  | empty        |             |         |                                |
| 2091 K02 | E | 196    | 160    | -1.61933176 | 276    | 280    | -1.41441889 | 81637      | -0.91074082 | 87362     | -0.90580172 | empty        |             |         |                                |
| 2091 K03 | X | 356    | 400    | -0.5545292  | 275    | 380    | -1.41890115 | 3079417    | 1.4646617   | 2437771   | 0.87382229  | experimental | Microsource | 1500124 | Amprolium                      |
| 2091 K04 | X | 355    | 360    | -0.73643297 | 374    | 360    | -1.0648027  | 2690012    | 1.15610216  | 1999280   | 0.54181662  | experimental | Microsource | 1500222 | Dapsone                        |
| 2091 K05 | X | 392    | 400    | -0.57227591 | 450    | 480    | -0.54486069 | 2859638    | 1.29051163  | 2535727   | 0.94799017  | experimental | Microsource | 1500126 | Antiazoline phosphate          |
| 2091 K06 | X | 1716   | 1720   | 5.30188483  | 2114   | 2120   | 6.82397273  | 1886950    | 0.51976611  | 2029153   | 1.24587465  | experimental | Microsource | 1500223 | Daunorubicin                   |
| 2091 K07 | X | 431    | 440    | -0.3992455  | 469    | 480    | -0.54934295 | 2704942    | 1.1679325   | 2932813   | 1.24864584  | experimental | Microsource | 1500127 | Anthrakin                      |
| 2091 K08 | X | 275    | 280    | -1.09136716 | 434    | 440    | -0.706222   | 2797282    | 1.24110154  | 2677234   | 1.05513291  | experimental | Microsource | 1500224 | Deferoxamine mesylate          |
| 2091 K09 | X | 394    | 400    | -0.56340256 | 474    | 680    | 0.3695201   | 2460923    | 0.97457497  | 2834530   | 1.17423037  | experimental | Microsource | 1500128 | Antipyrine                     |
| 2091 K10 | X | 874    | 880    | 1.56620255  | 672    | 480    | -0.53589617 | 2800330    | 1.24351673  | 2541308   | 0.95221586  | experimental | Microsource | 1500225 | Sodium hydrochlorolate         |
| 2091 K11 | X | 832    | 840    | 1.3798621   | 633    | 640    | 0.18574749  | 2441366    | 0.95907825  | 1947579   | 0.52311414  | experimental | Microsource | 1500129 | Apomorphine hydrochloride      |
| 2091 K12 | X | 274    | 280    | -1.09580383 | 434    | 440    | -0.706222   | 2361075    | 0.89545669  | 2432005   | 0.86945654  | experimental | Microsource | 1500226 | Demeclocycline hydrochloride   |
| 2091 K13 | X | 515    | 520    | -0.02656461 | 512    | 520    | -0.35660582 | 2729591    | 1.18748406  | 2929153   | 1.24587465  | experimental | Microsource | 1500130 | Aspirin                        |
| 2091 K14 | X | 675    | 680    | 0.68330376  | 994    | 1000   | 1.80384291  | 2444825    | 0.96181912  | 2238799   | 0.72316964  | experimental | Microsource | 1500227 | Desipramine hydrochloride      |
| 2091 K15 | X | 472    | 480    | -0.21734173 | 712    | 720    | 0.53984594  | 2585079    | 1.0729546   | 3117445   | 1.38844089  | experimental | Microsource | 1500131 | Atropine sulfate               |
| 2091 K16 | X | 713    | 720    | 0.8518975   | 552    | 560    | -0.17731547 | 2465740    | 0.9783919   | 2664853   | 1.04575857  | experimental | Microsource | 1500230 | Dexamethasone                  |
| 2091 K17 | X | 554    | 560    | 0.14646581  | 472    | 480    | -0.53589617 | 2391919    | 0.91989708  | 2535093   | 0.94751014  | experimental | Microsource | 1500132 | Aurothioglucose                |
| 2091 K18 | X | 394    | 400    | -0.56340256 | 914    | 920    | 1.44526221  | 2495185    | 1.00172374  | 2639771   | 1.02676761  | experimental | Microsource | 1500232 | Dexamethasone sodium phosphate |
| 2091 K19 | X | 474    | 480    | -0.20846837 | 473    | 480    | -0.53141391 | 2874192    | 1.30204404  | 2593911   | 0.99204448  | experimental | Microsource | 1500133 | Azathioprine                   |
| 2091 K20 | X | 474    | 480    | -0.03180428 | 593    | 600    | -0.44569507 | 0.96199503 | 1.348295601 |           |             | experimental | Microsource | 1500233 | Metamorphoran hydrobromide     |
| 2091 K21 | X | 673    | 680    | 0.67443041  | 912    | 920    | -1.43629769 | 2570557    | 0.61444755  | 3273250   | 1.50900473  | experimental | Microsource | 1500134 | Bacitracin                     |
| 2091 K22 | X | 672    | 680    | 0.66999373  | 828    | 840    | 1.05978795  | 2481831    | 0.9911422   | 2634189   | 1.02254117  | experimental | Microsource | 1500235 | Dibenzothioephene              |
| 2091 K23 | E | 622    | 960    | 0.44815987  | 685    | 1080   | 0.41882495  | 82766      | -0.90984622 | 86478     | -0.90647105 | empty        |             |         |                                |
| 2091 K24 | P | 113796 | 114400 | 502.564677  | 132729 | 133520 | 592.274202  | 2527686    | 1.02747712  | 2666067   | 1.04667776  | empty        |             |         |                                |
| 2091 L01 | N | 397    | 400    | -0.55009253 | 516    | 520    | -0.33867678 | 2134645    | 0.71603646  | 2554959   | 0.96255178  | empty        |             |         |                                |
| 2091 L02 | E | 196    | 200    | -1.44186466 | 236    | 240    | -1.59370924 | 76585      | -0.91474396 | 77486     | -0.91327938 | empty        |             |         |                                |
| 2091 L03 | X | 596    | 600    | 0.33280626  | 517    | 520    | -0.33419452 | 2172473    | 0.74601088  | 2262109   | 0.74081893  | experimental | Microsource | 1500334 | Hydralazine hydrochloride      |
| 2091 L04 | X | 236    | 240    | -0.91390007 | 593    | 600    | -0.39610114 | 289148233  | 0.91281007  | 310198387 | 1.02683807  | experimental | Microsource | 1500335 | Hydrochlorothiazide            |
| 2091 L05 | X | 315    | 320    | -0.91390007 | 555    | 560    | -0.16386869 | 2390648    | 0.91888996  | 2662587   | 1.04404286  | experimental | Microsource | 1500445 | Nylidrin hydrochloride         |
| 2091 L06 | X | 311    | 320    | -0.93164677 | 509    | 520    | -0.37005259 | 2896760    | 1.31992663  | 3378183   | 1.58585998  | experimental | Microsource | 1500338 | Hydrocortisone acetate         |
| 2091 L07 | X | 635    | 640    | 0.50583667  | 675    | 680    | 0.37400236  | 2531075    | 1.03016252  | 2729212   | 1.09448832  | experimental | Microsource | 1500446 | Nystatin                       |
| 2091 L08 | X | 355    | 360    | -0.73643297 | 433    | 440    | -0.71070426 | 2879336    | 1.30612008  | 3503175   | 1.6804983   | experimental | Microsource | 1500447 | Hydrocortisone hemisuccinate   |
| 2091 L09 | X | 355    | 360    | -0.73643297 | 552    | 560    | -0.17731547 | 2216050    | 0.78054074  | 2712923   | 1.08215502  | experimental | Microsource | 1500339 | Orphenadrine citrate           |
| 2091 L10 | X | 352    | 360    | -0.74974301 | 873    | 880    | 1.2614896   | 2518316    | 1.02005245  | 3309999   | 1.53423412  | experimental | Microsource | 1500448 | Oxacillin sodium               |
| 2091 L11 | X | 1120   | 1120   | 2.63110925  | 833    | 840    | -0.34932819 | 28549618   | 0.95249718  | 2643968   | 1.03120207  | experimental | Microsource | 1500449 | Oxidopamine hydrochloride      |
| 2091 L12 | X | 354    | 360    | -0.74086965 | 713    | 720    | 0.54330819  | 2684356    | 1.15162042  | 2930486   | 1.24688394  | experimental | Microsource | 1500450 | Hydroxyprogesterone caproate   |
| 2091 L13 | X | 314    | 320    | -0.91833674 | 434    | 440    | -0.706222   | 2189181    | 0.75925008  | 2791614   | 1.1417363   | experimental | Microsource | 1500451 | Oxybenzone                     |
| 2091 L14 | X | 514    | 520    | -0.03100128 | 473    | 480    | -0.53141391 | 2953513    | 1.36489698  | 3143839   | 1.40842524  | experimental | Microsource | 1500343 | Oxyphenbutazone                |
| 2091 L15 | X | 434    | 440    | -0.38593547 | 511    | 520    | -0.36108808 | 2272283    | 0.82509905  | 2535607   | 0.94789931  | experimental | Microsource | 1500452 | Oxytetracycline hydrochloride  |
| 2091 L16 | X | 594    | 600    | 0.3239329   | 1073   | 1080   | 2.15794135  | 3474360    | 1.77760948  | 3463273   | 1.6502863   | experimental | Microsource | 1500453 | Hydroxyzine pamoate            |
| 2091 L17 | X | 514    | 520    | -0.03100128 | 592    | 600    | 0.00197488  | 2364153    | 0.89789566  | 2748991   | 1.10946409  | experimental | Microsource | 1500454 | Oxyphenbutazone                |
| 2091 L18 | X | 794    | 800    | 0.38593547  | 474    | 480    | -0.53141391 | 2748563    | 1.20249723  | 3509920   | 1.56521766  | experimental | Microsource | 1500455 | Oxyphenbutazone                |
| 2091 L19 | X | 467    | 480    | -0.23952512 | 593    | 600    | 0.00645714  | 2364633    | 0.8982726   | 3215285   | 1.46252094  | experimental | Microsource | 1500456 | Oxyquinoline hemisulfate       |
| 2091 L20 | X | 593    | 600    | 0.31949622  | 631    | 640    | 0.17678298  | 2289665    | 0.83887232  | 2523385   | 0.93864537  | experimental | Microsource | 1500457 |                                |
| 2091 L21 | X | 671    | 680    | 0.66555705  | 831    | 840    | 1.07323473  | 2340889    | 0.87946156  | 2647455   | 1.03258559  | experimental | Microsource | 1500458 |                                |
| 2091 L22 | E | 687    | 1040   | 0.73654389  | 541    | 880    | -0.22662031 | 81700      | -0.9106909  | 82873     | -0.90920059 | empty        |             |         |                                |
| 2091 L23 | P | 118928 | 119600 | 525.333705  | 113391 | 114200 | 505.596282  | 2268963    | 0.82246832  | 2488650   | 0.91234559  | empty        |             |         |                                |
| 2091 M01 | N | 477    | 480    | -0.19515834 | 436    | 440    | -0.69725749 | 2711016    | 1.17274546  | 2133088   | 0.64085856  | empty        |             |         |                                |
| 2091 M02 | E | 236    | 240    | -1.26439757 | 197    | 200    | -1.76851733 | 79024      | -0.91281133 | 83984     | -0.90835939 | empty        |             |         |                                |
| 2091 M03 | X | 396    | 400    | -0.5545292  | 276    | 280    | -1.41441889 | 2746926    | 1.20120009  | 1982156   | 0.5288511   | experimental | Microsource | 1500135 | Baclofen                       |
| 2091 M04 | X | 355    | 360    | -0.73643297 | 316    | 320    | -1.23512854 | 2400886    | 0.92700242  | 2115880   | 0.6301009   | experimental | Microsource | 1500236 | Dibucaine hydrochloride        |
| 2091 M05 | X | 555    | 560    | 0.15090249  | 355    | 360    | -1.06032045 | 2641713    | 1.11783065  | 2413565   | 0.85549446  | experimental | Microsource | 1500136 | Betmethasone dipropionate      |
| 2091 M06 | X | 355    | 360    | -0.73643297 | 474    | 480    | -0.52693165 | 2469732    | 0.98155511  | 2637069   | 1.02472178  | experimental | Microsource | 1500237 | Diclofenac sodium              |
| 2091 M07 | X | 635    | 640    | 0.50583667  | 393    | 400    | -0.88999461 | 2466468    | 0.97896876  | 2597110   | 0.99446662  | experimental | Microsource | 1500137 | Benserazide hydrochloride      |
| 2091 M08 | X | 473    | 480    | -0.21290505 | 594    | 600    | 0.0109394   | 2550923    | 1.04588982  | 2821116   | 1.16407389  | experimental | Microsource | 1500238 | Dicloxacillin sodium           |
| 2091 M09 | X | 555    | 560    | 0.15090249  | 713    | 720    | 0.54330819  | 2319519    | 0.86252825  | 2219997   | 0.70893367  | experimental | Microsource | 1500138 | Benzethonium chloride          |
| 2091 M10 | X | 475    | 480    | -0.2040317  | 553    | 560    | -0.17283321 | 2735522    | 1.1921637   | 2448362   | 0.88184132  | experimental | Microsource | 1500239 | Dicumarol                      |
| 2091 M11 | X | 513    | 520    | -0.03543796 | 712    | 280    | -1.43234792 | 2251313    | 0.80848269  | 2054126   | 0.58334355  | experimental | Microsource | 1500139 | Benzocaine                     |
| 2091 M12 | X | 314    | 320    | -0.91833674 | 595    | 600    | 0.01542166  | 2356178    | 0.89157637  | 3239041   | 0.79149683  | experimental | Microsource | 1500240 | Dicyclomine hydrochloride      |
| 2091 M13 | X | 675    | 680    | 0.68330376  | 355    | 360    | -1.06032045 | 2298439    | 0.84582473  | 2140396   | 0.64866331  | experimental | Microsource | 1500141 | Difenhydramine                 |
| 2091 M14 | X | 474    | 480    | -0.20846837 | 394    | 400    | -0.88551235 | 2214133    | 0.77902173  | 2148590   | 0.65486744  | experimental | Microsource | 1500241 | Dienestrol                     |
| 2091 M15 | X | 434    | 440    | -0.38593547 | 874    | 880    | 1.26597186  | 2237370    | 0.79743443  | 2165668   | 0.66779814  | experimental | Microsource | 1500142 | Benzotropine                   |
| 2091 M16 | X | 494    | 400    | -0.56340256 | 712    | 720    | 0.53984594  | 2347491    | 0.8645929   | 2354943   | 0.87168106  | experimental | Microsource | 1500242 | Diethylcarbamazine citrate     |
| 2091 M17 | X | 515    | 520    | -0.02656461 | 434    | 440    | -0.706222   | 2220967    | 0.7844369   | 2180762   | 0.67922664  | experimental | Microsource | 1500143 | Beta-carotene                  |
| 2091 M18 | X | 231    | 240    | -1.28658096 | 471    | 480    | -0.54037843 | 1590469    | 0.28483835  | 2662447   | 1.04393686  | experimental | Microsource | 1500244 | Diethylstilbestrol             |
| 2091 M19 | X | 788    | 800    | 1.1846483   | 512    | 520    | -0.35660582 | 2363255    | 0.89718409  | 2492279   | 0.9150933   | experimental | Microsource | 1500146 | Bethanechol chloride           |
| 2091 M20 | X | 2633   | 2640   | 9.37031792  | 873    | 880    | 1.2614896   | 2430253    | 0.95027245  | 2864467</ |             |              |             |         |                                |

|          |   |        |        |             |        |        |             |          |             |         |             |              |              |             |                                   |                               |
|----------|---|--------|--------|-------------|--------|--------|-------------|----------|-------------|---------|-------------|--------------|--------------|-------------|-----------------------------------|-------------------------------|
| 2091 N13 | X | 435    | 440    | -0.38149879 | 315    | 320    | -1.2396108  | 2294603  | 0.84278513  | 2691740 | 1.0661162   | experimental | Microsource  | 1500352     | Inositol                          |                               |
| 2091 N14 | X | 274    | 280    | -1.09580383 | 434    | 440    | -0.706222   | 2168339  | 0.74273515  | 2466260 | 0.89539288  | experimental | Microsource  | 1500467     | Penicillin v potassium            |                               |
| 2091 N15 | X | 674    | 680    | 0.67886709  | 594    | 600    | 0.0109394   | 2416716  | 0.93954591  | 2644414 | 1.03005594  | experimental | Microsource  | 1500353     | Iodoquinol                        |                               |
| 2091 N16 | X | 513    | 520    | -0.03543796 | 394    | 400    | -0.88551235 | 2362663  | 0.896715    | 2189944 | 0.69137603  | experimental | Microsource  | 1500472     | Phenacetamide                     |                               |
| 2091 N17 | X | 672    | 680    | 0.66999373  | 391    | 400    | -0.89895913 | 2359474  | 0.89418887  | 2790959 | 1.07922937  | experimental | Microsource  | 1500354     | Ipratropium bromide               |                               |
| 2091 N18 | X | 1315   | 1320   | 3.52277724  | 1593   | 1600   | 4.48871591  | 2301879  | 0.84855054  | 2358259 | 0.81361938  | W            | experimental | Microsource | 1500473                           | Phenazopyridine hydrochloride |
| 2091 N19 | X | 471    | 480    | -0.22177841 | 788    | 800    | 0.8804976   | 2444318  | 0.96141738  | 2692298 | 1.06653869  | experimental | Microsource  | 1500355     | Isotiazid                         |                               |
| 2091 N20 | X | 387    | 400    | -0.5944593  | 831    | 840    | 1.07323473  | 2350785  | 0.88730303  | 2503633 | 0.92369004  | experimental | Microsource  | 1500476     | Phenelzine sulfate                |                               |
| 2091 N21 | X | 674    | 680    | 0.67886709  | 672    | 680    | 0.36055558  | 2358186  | 0.89316748  | 2604461 | 1.00003247  | experimental | Microsource  | 1500356     | Isopropamide iodide               |                               |
| 2091 N22 | X | 551    | 560    | 0.13315578  | 571    | 680    | 0.35607333  | 2013776  | 0.62026141  | 2351044 | 0.80815651  | experimental | Microsource  | 1500477     | Phenindione                       |                               |
| 2091 N23 | E | 745    | 1200   | 0.99387117  | 646    | 960    | -0.20420902 | 77506    | -0.91401417 | 80076   | -0.91131835 | empty        |              |             |                                   |                               |
| 2091 N24 | P | 153821 | 154560 | 680.142686  | 138875 | 139840 | 619.822185  | 2380583  | 0.91091458  | 2304028 | 0.78483765  | empty        |              |             |                                   |                               |
| 2091 O01 | N | 517    | 600    | 0.33724293  | 556    | 560    | -0.15938643 | 2478456  | 0.98846789  | 1946525 | 0.50187291  | empty        |              |             |                                   |                               |
| 2091 O02 | E | 126    | 120    | -1.79679885 | 355    | 360    | -1.06032045 | 74577    | -0.91633508 | 80846   | -0.91073534 | empty        |              |             |                                   |                               |
| 2091 O03 | X | 395    | 400    | -0.55896588 | 634    | 640    | 0.19022975  | 3163057  | 1.53093697  | 1909199 | 0.47361134  | experimental | Microsource  | 1500147     | Bisacodyl                         |                               |
| 2091 O04 | X | 354    | 360    | -0.74086965 | 314    | 320    | -1.24409306 | 1741455  | 0.40447773  | 1561238 | 0.21015092  | experimental | Microsource  | 1500247     | Digoxin                           |                               |
| 2091 O05 | X | 674    | 680    | 0.67886709  | 594    | 600    | -0.88551235 | 1902318  | 0.53194351  | 1672966 | 0.29474634  | experimental | Microsource  | 1500148     | Bithioniate sodium                |                               |
| 2091 O06 | X | 672    | 680    | 0.66999373  | 792    | 800    | 0.89842664  | 2273867  | 0.82635419  | 2421708 | 0.86166011  | experimental | Microsource  | 1500249     | Dihydrostreptomycin sulfate       |                               |
| 2091 O07 | X | 474    | 480    | -0.20846837 | 673    | 680    | 0.36503784  | 2052385  | 0.65085468  | 2304028 | 0.77253811  | experimental | Microsource  | 1500151     | Bromocriptine mesylate            |                               |
| 2091 O08 | X | 672    | 680    | 0.66999373  | 393    | 400    | -0.89899461 | 2498620  | 1.00444559  | 2341897 | 0.80123081  | experimental | Microsource  | 1500251     | Dimenhydrinate                    |                               |
| 2091 O09 | X | 672    | 680    | 0.66999373  | 513    | 520    | -0.35212356 | 2115417  | 0.70080043  | 2442758 | 0.87759823  | experimental | Microsource  | 1500152     | Busulfan                          |                               |
| 2091 O10 | X | 1074   | 1080   | 2.45353801  | 394    | 400    | -0.88551235 | 2227870  | 0.78990675  | 2133005 | 0.64306718  | experimental | Microsource  | 1500253     | Dimefethadione                    |                               |
| 2091 O11 | X | 793    | 800    | -1.20683168 | 433    | 440    | -0.71070426 | 2554008  | 1.04833433  | 2252243 | 0.73334883  | experimental | Microsource  | 1500155     | Caffeine                          |                               |
| 2091 O12 | X | 394    | 400    | -0.56340256 | 555    | 560    | -0.16386869 | 2163470  | 0.73887702  | 2144957 | 0.6521167   | experimental | Microsource  | 1500255     | Dioxibenzone                      |                               |
| 2091 O13 | X | 435    | 440    | -0.38149879 | 394    | 400    | -0.88551235 | 2258608  | 0.81426315  | 2122248 | 0.63492247  | experimental | Microsource  | 1500156     | Camphor (1r)                      |                               |
| 2091 O14 | X | 565    | 560    | -0.15090249 | 695    | 695    | 0.15090249  | 11912209 | 0.7107441   | 2392307 | 0.57203998  | experimental | Microsource  | 1500256     | Diphenhydramine hydrochloride     |                               |
| 2091 O15 | X | 673    | 680    | 0.67443041  | 513    | 520    | -0.35212356 | 2251121  | 0.76394973  | 2399355 | 0.8423733   | experimental | Microsource  | 1500155     | Carbamoyl sulfate                 |                               |
| 2091 O16 | X | 713    | 720    | 0.8518975   | 474    | 480    | -0.52693165 | 2048523  | 0.64779448  | 2066346 | 0.59259598  | experimental | Microsource  | 1500258     | Diphenylpicrylamine hydrochloride |                               |
| 2091 O17 | X | 473    | 480    | -0.21290505 | 594    | 600    | 0.0109394   | 2459675  | 0.97358607  | 2369191 | 0.8218966   | experimental | Microsource  | 1500158     | Carbachol                         |                               |
| 2091 O18 | X | 432    | 440    | -0.39480882 | 628    | 640    | 0.1633362   | 3802452  | 2.03758539  | 4266685 | 2.25859374  | experimental | Microsource  | 1500259     | Dipyridamole                      |                               |
| 2091 O19 | X | 474    | 480    | -0.20846837 | 1312   | 1320   | 3.2292012   | 2342838  | 0.88100593  | 2645175 | 1.03085928  | experimental | Microsource  | 1500159     | Carbamazepine                     |                               |
| 2091 O20 | X | 514    | 520    | -0.03100128 | 630    | 640    | 0.17230072  | 1563149  | 0.26319034  | 1607882 | 0.24546766  | experimental | Microsource  | 1500260     | Pyritnone zinc                    |                               |
| 2091 O21 | X | 592    | 600    | 0.31505955  | 712    | 720    | 0.53984594  | 2102469  | 0.6905406   | 2706001 | 1.07691399  | experimental | Microsource  | 1500160     | Carbenicillin disodium            |                               |
| 2091 O22 | X | 674    | 680    | 0.6655705   | 909    | 909    | 0.6655705   | 1912209  | 0.93770232  | 2392350 | 0.65770232  | experimental | Microsource  | 1500262     | Dulcifram                         |                               |
| 2091 O23 | E | 713    | 1120   | 0.8518975   | 809    | 1360   | 0.97462504  | 78679    | -0.9130847  | 81303   | -0.91038932 | empty        |              |             |                                   |                               |
| 2091 O24 | P | 136426 | 137320 | 602.966684  | 186246 | 187240 | 832.151245  | 2266945  | 0.82086928  | 2306076 | 0.77410876  | empty        |              |             |                                   |                               |
| 2091 P01 | N | 798    | 800    | 1.22901507  | 638    | 640    | 0.20815879  | 1533017  | 0.23931412  | 1741404 | 0.34656451  | empty        |              |             |                                   |                               |
| 2091 P02 | E | 195    | 200    | -1.44630134 | 274    | 280    | -1.42338341 | 71970    | -0.91840083 | 73865   | -0.91602104 | empty        |              |             |                                   |                               |
| 2091 P03 | X | 877    | 880    | 1.57951258  | 916    | 920    | 1.45422673  | 1714449  | 0.38307852  | 2029972 | 0.56505523  | experimental | Microsource  | 1500357     | Isoproterenol hydrochloride       |                               |
| 2091 P04 | X | 435    | 440    | -0.38149879 | 395    | 440    | -0.70173974 | 2026200  | 0.63010602  | 2374975 | 0.82627599  | experimental | Microsource  | 1500478     | Pheniramine maleate               |                               |
| 2091 P05 | X | 435    | 440    | -0.38149879 | 435    | 440    | -0.38149879 | 1783079  | 0.4418383   | 2191919 | 0.56510519  | experimental | Microsource  | 1500358     | Phenylephrine                     |                               |
| 2091 P06 | X | 1155   | 1160   | 0.81290887  | 594    | 600    | 0.0109394   | 2155280  | 0.73238737  | 2497055 | 0.91870947  | experimental | Microsource  | 1500480     | Phenolphthalein                   |                               |
| 2091 P07 | X | 513    | 520    | -0.03543796 | 674    | 680    | 0.3695201   | 1823868  | 0.46978074  | 2019436 | 0.55707784  | experimental | Microsource  | 1500359     | Isosuxprine hydrochloride         |                               |
| 2091 P08 | X | 635    | 640    | 0.50583667  | 713    | 720    | 0.54432819  | 1976744  | 0.59091772  | 2604488 | 1.00005291  | experimental | Microsource  | 1500482     | Phenylbutazone                    |                               |
| 2091 P09 | X | 475    | 480    | -0.2040317  | 1194   | 1200   | 2.70029466  | 1846047  | 0.48735509  | 2311338 | 0.77809291  | experimental | Microsource  | 1500360     | Kanamycin a sulfate               |                               |
| 2091 P10 | X | 474    | 480    | -0.20846837 | 714    | 720    | 0.54881045  | 2127950  | 0.71073142  | 2692162 | 1.06643572  | experimental | Microsource  | 1500483     | Phenylephrine hydrochloride       |                               |
| 2091 P11 | X | 475    | 480    | -0.2040317  | 635    | 640    | 0.19471201  | 1740058  | 0.40337076  | 1934762 | 0.4929665   | experimental | Microsource  | 1500362     | Ketocanzole                       |                               |
| 2091 P12 | X | 476    | 480    | -0.19959502 | 495    | 480    | -0.52244939 | 1996282  | 0.60639938  | 2025266 | 0.92061826  | experimental | Microsource  | 1500484     | Levonordrin                       |                               |
| 2091 P13 | X | 476    | 480    | -0.19959502 | 556    | 560    | -0.15938643 | 2974367  | 0.58989427  | 2376898 | 0.6827733   | experimental | Microsource  | 1500365     | Levonordrin                       |                               |
| 2091 P14 | X | 476    | 480    | -0.19959502 | 515    | 520    | -0.34315904 | 1925198  | 0.55007333  | 2279127 | 0.75370419  | experimental | Microsource  | 1500485     | Phenylephrine hydrochloride       |                               |
| 2091 P15 | X | 395    | 400    | -0.55896588 | 676    | 680    | 0.37848462  | 1929894  | 0.55379438  | 2317903 | 0.78306363  | experimental | Microsource  | 1500372     | Mefenidine hydrochloride          |                               |
| 2091 P16 | X | 595    | 600    | 0.32836958  | 475    | 480    | -0.52244939 | 2121552  | 0.70566713  | 2362503 | 0.81683275  | experimental | Microsource  | 1500486     | Phystostigmine salicylate         |                               |
| 2091 P17 | X | 635    | 640    | 0.50583667  | 615    | 620    | -0.34315904 | 1953341  | 0.57237348  | 2118661 | 0.63220655  | experimental | Microsource  | 1500373     | Maprotiline hydrochloride         |                               |
| 2091 P18 | X | 475    | 480    | -0.2040317  | 673    | 640    | 0.19471201  | 2120928  | 0.70516728  | 2410721 | 0.85334125  | experimental | Microsource  | 1500487     | Pilocarpine nitrate               |                               |
| 2091 P19 | X | 515    | 520    | -0.02654661 | 635    | 680    | 0.36503784  | 1930532  | 0.55429992  | 2301539 | 0.77067355  | experimental | Microsource  | 1500374     | Mecamylamine hydrochloride        |                               |
| 2091 P20 | X | 755    | 760    | 1.03823795  | 554    | 560    | -0.16835095 | 2020419  | 0.62552523  | 2392350 | 0.83958299  | experimental | Microsource  | 1500488     | Pindolol                          |                               |
| 2091 P21 | X | 754    | 760    | 1.03823795  | 633    | 640    | 0.18574749  | 1917230  | 0.54375959  | 2207086 | 0.69915798  | experimental | Microsource  | 1500364     | Leucovorin calcium                |                               |
| 2091 P22 | X | 672    | 680    | 0.66999373  | 992    | 1000   | 1.79487839  | 1936768  | 0.55924125  | 2343986 | 0.80281251  | experimental | Microsource  | 1500489     | Piperacillin sodium               |                               |
| 2091 P23 | E | 871    | 1320   | 1.55289251  | 648    | 1240   | 0.25298137  | 72684    | -0.91783507 | 75579   | -0.91472328 | empty        |              |             |                                   |                               |
| 2091 P24 | P | 152839 | 153240 | 675.785869  | 201534 | 202080 | 900.676017  | 1728782  | 0.39443581  | 1864761 | 0.43996489  | empty        |              |             |                                   |                               |
| 2092 A01 | N | 557    | 560    | -0.18284368 | 1158   | 1160   | 0.57416205  | 1570969  | 0.25065867  | 1670470 | 0.30034044  | empty        |              |             |                                   |                               |
| 2092 A02 | E | 157    | 160    | -0.88362509 | 235    | 240    | -0.50021162 | 75067    | -0.90955516 | 73013   | -0.91390346 | empty        |              |             |                                   |                               |
| 2092 A03 | X | 397    | 400    | -0.46315624 | 436    | 440    | -0.26247225 | 1828213  | 0.45017579  | 1941169 | 0.50610157  | experimental | Microsource  | 1500490     | Piperazine                        |                               |
| 2092 A04 | X | 555    | 560    | -0.18634759 | 555    | 560    | -0.12753104 | 1989199  | 0.57035669  | 1996776 | 0.54836904  | experimental | Microsource  | 1500592     | Trihexyphenidyl hydrochloride     |                               |
| 2092 A05 | X | 755    | 760    | 1.16404312  | 596    | 600    | -0.08000697 | 1950132  | 0.54473553  | 1975470 | 0.53217412  | experimental | Microsource  | 1500491     | Piroxicam                         |                               |
| 2092 A06 | X | 554    | 560    | -0.18809954 | 395    | 400    | -0.31397133 | 1872251  | 0.48433143  | 1756908 | 0.36604285  | experimental | Microsource  | 1500593     | Trimiprazine tartrate             |                               |
| 2092 A07 | X | 674    | 680    | 0.67886709  | 556    | 560    | -0.12656704 | 1954945  | 0.54846847  | 2124999 | 0.64583269  | experimental | Microsource  | 1500492     | Polymyxin b sulfate               |                               |
| 2092 A08 | X | 955    | 960    | 0.51443382  | 635    | 640    | -0.0346109  | 2001262  | 0.58439169  | 2035770 | 0.57800879  | experimental | Microsource  | 1500594     | Trimethoprim hydrochloride        |                               |
| 2092 A09 | X | 434    | 440    | -0.12889504 | 556    | 560    | -0.12889504 | 2254537  | 0.78083047  | 2039092 | 0.58053388  | experimental | Microsource  | 1500494     | Prizabiquantel                    |                               |
| 2092 A10 | X | 636    | 640    | -0.04443935 | 835    | 840    | -0.19815947 | 2254451  | 0.7807337   | 2329256 | 0.78175776  | experimental | Microsource  | 1500595     | Trimethoprim                      |                               |
| 2092 A11 | X | 472    | 480    | -0.33175973 | 551    | 560    | -0.13288705 | 1939573  | 0.69166499  | 2626073 | 1.02670431  | experimental | Microsource  | 1500495     | Zalcitabine hydrochloride         |                               |
| 2092 A12 | X | 476    | 480    | -0.32475191 | 675    | 680    | 0.01194918  | 2162400  | 0.70936949  | 2122027 | 0.64357364  | experimental | Microsource  | 1500596     | Trioxsalen                        |                               |
| 2092 A13 | X | 516    | 520    | -0.25467377 | 635    | 640    | -0.034      |          |             |         |             |              |              |             |                                   |                               |



|          |   |        |        |            |             |        |            |             |            |             |            |             |              |               |             |                              |                                |
|----------|---|--------|--------|------------|-------------|--------|------------|-------------|------------|-------------|------------|-------------|--------------|---------------|-------------|------------------------------|--------------------------------|
| 2092 B07 | X |        | 394    | 400        | -0.4684121  | 314    | 320        | -0.40825547 | 2524798    | 0.9904435   | 2630185    | 1.02982989  | experimental | Microsource   | 1501011     | Fenoprofen                   |                                |
| 2092 B08 | X |        | 434    | 440        | -0.39833396 | 475    | 480        | -0.22085118 | 2407444    | 0.8994235   | 2930863    | 1.2583784   | experimental | Microsource   | 1502042     | Cefoperazone sodium          |                                |
| 2092 B09 | X |        | 394    | 400        | -0.4684121  | 594    | 600        | -0.08233497 | 2534705    | 0.99812732  | 3107886    | 1.39293544  | experimental | Microsource   | 1501015     | Flufenamic acid              |                                |
| 2092 B10 | X |        | 511    | 520        | -0.26343354 | 550    | 560        | -0.13351005 | 2749674    | 1.1648561   | 2763668    | 1.13130692  | experimental | Microsource   | 1502044     | Ofloxacin                    |                                |
| 15564    |   |        | 1564   | 1560       | -0.3835398  | 1634   | 1640       | -1.1282699  | 2855823    | 2.4718477   | 2289252    | 0.77068313  | experimental | Microsource   | 1501016     | Fenbendazole                 |                                |
| 2092 B12 | X |        | 512    | 520        | -0.26168159 | 510    | 520        | -0.18011112 | 2713550    | 1.13683857  | 2609317    | 1.0139679   | experimental | Microsource   | 1502046     | Bezafibrate                  |                                |
| 2092 B13 | X |        | 352    | 360        | -0.54199415 | 672    | 680        | 0.00845717  | 2439643    | 0.92439772  | 2412403    | 0.8642915   | experimental | Microsource   | 1501021     | Fenpropiridone hydrochloride |                                |
| 2092 B14 | X | 1433   | 1440   | 1.3518676  | 1112        | 920    | 0.2878176  | 2432541     | 0.91888945 | 2596008     | 1.00385159 | 2479635     | 0.91539525   | experimental  | Microsource | 1502047                      | Lithionazole (- isomer) sodium |
| 2092 B15 | X |        | 790    | 800        | 0.22536149  | 914    | 1120       | 0.52294597  | 2422853    | 0.91137549  | 2479635    | 0.91539525  | experimental | Microsource   | 1501100     | Mebendazole                  |                                |
| 2092 B16 | X |        | 871    | 880        | 0.36726972  | 512    | 520        | -0.17778312 | 2762558    | 1.17484892  | 3005856    | 1.31538137  | experimental | Microsource   | 1502006     | Carprofen                    |                                |
| 2092 B17 | X |        | 711    | 720        | 0.08695716  | 353    | 360        | -0.3628594  | 2297253    | 0.81396078  | 2345529    | 0.81345987  | experimental | Microsource   | 1501103     | Mefenamic acid               |                                |
| 2092 B18 | X |        | 951    | 960        | -0.1933554  | 434    | 440        | -0.26937526 | 2696285    | 1.12244793  | 2480227    | 0.90309134  | experimental | Microsource   | 1502053     | Alrestatin                   |                                |
| 2092 B19 | X |        | 514    | 520        | -0.25817768 | 551    | 560        | -0.13238705 | 2541350    | 1.00328114  | 2613715    | 1.01731087  | experimental | Microsource   | 1501104     | Methacycline hydrochloride   |                                |
| 2092 B20 | X |        | 395    | 400        | -0.46666015 | 515    | 520        | -0.17429111 | 2212101    | 0.74791733  | 2704375    | 0.60735286  | experimental | Microsource   | 1502084     | Proadifen hydrochloride      |                                |
| 2092 B21 | X |        | 354    | 360        | -0.53849024 | 314    | 320        | -0.40825547 | 1655727    | 0.31639654  | 1519815    | 0.18582596  | experimental | Microsource   | 1501105     | Puromycin hydrochloride      |                                |
| 2092 B22 | X |        | 632    | 640        | -0.05144717 | 512    | 520        | -0.17778312 | 2489341    | 0.96294323  | 2417624    | 0.86826003  | experimental | Microsource   | 1502106     | Carboplatin                  |                                |
| 2092 B23 | E |        | 486    | 840        | -0.30723238 | 695    | 1080       | 0.03522921  | 81574      | -0.90450836 | 83196      | -0.90616326 | empty        |               |             |                              |                                |
| 2092 B24 | P | 118858 | 119640 | 207.075009 | 128794      | 129800 | 149.142696 | 1878165     | 0.4889183  | 1949530     | 0.51245686 | empty       |              |               |             |                              |                                |
| 2092 C01 | N |        | 475    | 480        | -0.32650387 | 597    | 600        | -0.07084295 | 2015972    | 0.59580069  | 2408027    | 0.58732546  | empty        |               |             |                              |                                |
| 2092 C02 | E |        | 195    | 200        | -0.81705085 | 156    | 160        | -0.59216776 | 80160      | -0.90560505 | 79961      | -0.90862222 | empty        |               |             |                              |                                |
| 2092 C03 | X |        | 915    | 920        | 0.44435568  | 436    | 440        | -0.26624725 | 2689322    | 1.11804746  | 2674367    | 1.06341309  | experimental | Microsource   | 1500502     | Probenecid                   |                                |
| 2092 C04 | X |        | 432    | 440        | -0.40183787 | 353    | 360        | -0.3628594  | 2594538    | 1.04453348  | 2501083    | 0.9316981   | experimental | Microsource   | 1500602     | Tubocurarine chloride        |                                |
| 2092 C05 | X |        | 914    | 920        | 0.44260373  | 635    | 640        | -0.0346109  | 2630259    | 1.0722385   | 2723497    | 1.10075732  | experimental | Microsource   | 1500503     | Procainamide hydrochloride   |                                |
| 2092 C06 | X |        | 469    | 480        | -0.33701559 | 474    | 480        | -0.22201519 | 1590901    | 0.26611783  | 1571984    | 0.22548017  | experimental | Microsource   | 1500603     | Tyrothricin                  |                                |
| 2092 C07 | X |        | 394    | 400        | -0.4684121  | 755    | 760        | 0.10506932  | 2725454    | 1.14607125  | 2589934    | 0.99923468  | experimental | Microsource   | 1500504     | Procaine hydrochloride       |                                |
| 2092 C08 | X |        | 494    | 480        | -0.38333561 | 313    | 320        | -0.40941945 | 2589718    | 1.04979531  | 2452208    | 1.05419115  | experimental | Microsource   | 1501105     | Urea                         |                                |
| 2092 C09 | X |        | 715    | 720        | 0.09396498  | 394    | 400        | -0.31513533 | 1902356    | 0.50768071  | 2283153    | 0.76504721  | experimental | Microsource   | 1500505     | Prochlorperazine edisylate   |                                |
| 2092 C10 | X |        | 352    | 360        | -0.54199415 | 473    | 480        | -0.22317919 | 2270907    | 0.79352696  | 2664793    | 1.05613579  | experimental | Microsource   | 1500605     | Ursodiol                     |                                |
| 2092 C11 | X |        | 552    | 560        | -0.19160345 | 511    | 520        | -0.17894712 | 2605830    | 1.0532915   | 2455720    | 0.8972172   | experimental | Microsource   | 1500507     | Procydiline hydrochloride    |                                |
| 2092 C12 | X |        | 354    | 360        | -0.53849024 | 433    | 440        | -0.26973926 | 2531972    | 0.99600762  | 3052903    | 1.35114229  | experimental | Microsource   | 1500606     | Valproate sodium             |                                |
| 2092 C13 | X |        | 355    | 360        | -0.53673829 | 634    | 640        | -0.0357749  | 2893106    | 1.27610127  | 2481316    | 0.91667299  | experimental | Microsource   | 1500508     | Progesterone                 |                                |
| 2092 C14 | X |        | 551    | 560        | -0.1933554  | 433    | 440        | -0.26973926 | 2712260    | 1.13583805  | 2569318    | 0.98356424  | experimental | Microsource   | 1500607     | Vancocycin hydrochloride     |                                |
| 2092 C15 | X |        | 432    | 440        | -0.40183787 | 193    | 200        | -0.54909969 | 2007400    | 0.58915229  | 2210257    | 0.71063819  | experimental | Microsource   | 1500509     | Promazine hydrochloride      |                                |
| 2092 C23 | E |        | 497    | 480        | -0.38333561 | 515    | 520        | -0.17429111 | 2065326    | 1.09979531  | 2589915    | 0.99923468  | experimental | Microsource   | 1500510     | Meperidine                   |                                |
| 2092 C17 | X |        | 1112   | 1120       | 0.78949052  | 594    | 600        | -0.08233497 | 2094312    | 0.65656079  | 2526277    | 0.95084832  | experimental | Microsource   | 1500510     | Promethazine hydrochloride   |                                |
| 2092 C18 | X |        | 832    | 840        | 0.29894354  | 671    | 680        | 0.00729317  | 2335193    | 0.84338684  | 2319853    | 0.79394327  | experimental | Microsource   | 1500611     | Vinblastine sulfate          |                                |
| 2092 C19 | X |        | 513    | 520        | -0.25992963 | 1633   | 1640       | -1.1270629  | 2866410    | 1.25539599  | 2593502    | 1.00194675  | experimental | Microsource   | 1500511     | Procaine hydrochloride       |                                |
| 2092 C20 | X |        | 515    | 520        | -0.25642573 | 431    | 440        | -0.27206726 | 2676650    | 1.10821912  | 2990162    | 1.30345219  | experimental | Microsource   | 1500613     | Warfarin                     |                                |
| 2092 C21 | X |        | 434    | 440        | -0.39833396 | 354    | 360        | -0.3616954  | 2182504    | 0.72496205  | 2550010    | 0.96888803  | experimental | Microsource   | 1500514     | Dexpropranolol hydrochloride |                                |
| 2092 C22 | X |        | 552    | 560        | -0.19160345 | 512    | 520        | -0.17778312 | 2410206    | 0.90156654  | 2480361    | 0.91609911  | experimental | Microsource   | 1500614     | Xylometazoline hydrochloride |                                |
| 2092 C23 | E |        | 497    | 480        | -0.38333561 | 515    | 520        | -0.17429111 | 2065326    | 1.09979531  | 2589915    | 0.99923468  | experimental | Microsource   | 1500510     | Meperidine                   |                                |
| 2092 C24 | P | 101780 | 102480 | 177.155147 | 142715      | 143520 | 165.344765 | 2008370     | 0.58990462 | 2145474     | 0.66160118 | empty       |              |               |             |                              |                                |
| 2092 D01 | N |        | 756    | 760        | 0.16579507  | 436    | 440        | -0.26624725 | 2169136    | 0.7145939   | 2004481    | 0.55422569  | empty        |               |             |                              |                                |
| 2092 D02 | E |        | 275    | 280        | -0.67689457 | 236    | 240        | -0.49904761 | 84280      | -0.9024096  | 82769      | -0.90648783 | empty        |               |             |                              |                                |
| 2092 D03 | X |        | 553    | 560        | -0.18985149 | 436    | 440        | -0.26624725 | 2665887    | 1.0998714   | 2925937    | 1.25463409  | experimental | Microsource   | 1501108     | Mefexamide                   |                                |
| 2092 D04 | X |        | 514    | 520        | -0.25817768 | 355    | 360        | -0.3605314  | 2412908    | 0.9036622   | 2491692    | 0.9245599   | experimental | Microsource   | 1502107     | Cisplatin                    |                                |
| 2092 D05 | X |        | 429    | 440        | -0.40709373 | 395    | 400        | -0.31397133 | 2502392    | 0.97306552  | 2588102    | 0.99784216  | experimental | Microsource   | 1501109     | Probucol                     |                                |
| 2092 D06 | X |        | 515    | 520        | -0.19639919 | 380    | 380        | -0.45481555 | 2665789    | 1.09979539  | 2808265    | 0.96195126  | experimental | Microsource   | 1502109     | Zidovudine [azt]             |                                |
| 2092 D07 | X |        | 590    | 600        | -0.12502921 | 514    | 520        | -0.17545511 | 1746197    | 0.16715942  | 3001336    | 1.3194456   | experimental | Microsource   | 1501136     | Procaine hydrochloride       |                                |
| 2092 D08 | X |        | 509    | 520        | -0.26693745 | 701    | 720        | 0.04221322  | 2033253    | 0.60920375  | 1945542    | 0.50942554  | experimental | Microsource   | 1502111     | Azaticidin                   |                                |
| 2092 D09 | X |        | 593    | 600        | -0.11977335 | 632    | 640        | -0.0381029  | 2663934    | 1.09835666  | 2845310    | 1.19334866  | experimental | Microsource   | 1501117     | Mebeverine hydrochloride     |                                |
| 2092 D10 | X |        | 795    | 800        | 0.23412126  | 994    | 1000       | 0.38326575  | 2030650    | 0.60718487  | 2196573    | 0.70023684  | experimental | Microsource   | 1502112     | Cycloheximide                |                                |
| 2092 D11 | X |        | 312    | 320        | -0.61032034 | 432    | 440        | -0.27090326 | 2560505    | 1.01813766  | 2924783    | 1.25375693  | experimental | Microsource   | 1501118     | Mecloxyline sulfosalicylate  |                                |
| 2092 D12 | X |        | 555    | 560        | -0.18634759 | 755    | 760        | 0.10506932  | 3042149    | 1.39169825  | 3064377    | 1.35988638  | experimental | Microsource   | 1502113     | Azaserine                    |                                |
| 2092 D13 | X |        | 593    | 600        | -0.11977335 | 473    | 480        | -0.22317919 | 2832906    | 1.22941047  | 2424727    | 0.87365991  | experimental | Microsource   | 1501119     | Progulimide                  |                                |
| 2092 D14 | X |        | 713    | 720        | 0.09046107  | 515    | 520        | -0.17429111 | 2667294    | 1.10096286  | 2589915    | 0.99923468  | experimental | Microsource   | 1502127     | Tindazole                    |                                |
| 2092 D15 | X |        | 552    | 560        | -0.19160345 | 354    | 360        | -0.3616954  | 3367767    | 1.64424588  | 3289414    | 1.53091679  | experimental | Microsource   | 1501120     | Minaprine hydrochloride      |                                |
| 2092 D16 | X |        | 633    | 640        | -0.04969521 | 515    | 520        | -0.17429111 | 2479444    | 0.95526717  | 3192301    | 1.45710017  | experimental | Microsource   | 1502150     | Carbidopa                    |                                |
| 2092 D17 | X |        | 387    | 400        | -0.48067578 | 423    | 440        | -0.28137928 | 2429957    | 0.91688531  | 2473641    | 0.91083914  | experimental | Microsource   | 1501121     | Mefenamic acid               |                                |
| 2092 D18 | X |        | 554    | 560        | -0.18809954 | 514    | 520        | -0.17545511 | 2685931    | 1.11541742  | 2602474    | 1.00876646  | experimental | Microsource   | 1502195     | Piracetam                    |                                |
| 2092 D19 | X |        | 674    | 680        | 0.02213488  | 670    | 680        | 0.00612917  | 2358908    | 0.86178008  | 2897589    | 1.23308648  | experimental | Microsource   | 1501127     | Atenolol                     |                                |
| 2092 D20 | X |        | 474    | 480        | -0.32825582 | 634    | 640        | -0.0357749  | 2549320    | 1.00946264  | 3040405    | 1.34164243  | experimental | Microsource   | 1502196     | Ethosuximide                 |                                |
| 2092 D21 | X |        | 474    | 480        | -0.32825582 | 634    | 640        | -0.0357749  | 2393524    | 0.88862807  | 2650016    | 1.04490364  | experimental | Microsource   | 1501128     | Capsaicin                    |                                |
| 2092 D22 | X |        | 713    | 720        | 0.09046107  | 632    | 640        | -0.0381029  | 2635602    | 1.07538251  | 3429340    | 1.63727601  | experimental | Microsource   | 1502197     | Piperidolate hydrochloride   |                                |
| 2092 D23 | E |        | 442    | 800        | -0.38431833 | 607    | 1040       | -0.06720295 | 86339      | -0.90081265 | 82722      | -0.90652355 | empty        |               |             |                              |                                |
| 2092 D24 | P | 120663 | 121200 | 210.237285 | 146300      | 146960 | 169.519711 | 2287014     | 0.80601946 | 2238415     | 0.73204139 | empty       |              |               |             |                              |                                |
| 2092 E01 | N |        | 556    | 560        | -0.18459563 | 517    | 520        | -0.17196311 | 2085477    | 0.64970841  | 2055771    | 0.59321176  | empty        |               |             |                              |                                |
| 2092 E02 | E |        | 235    | 240        | -0.74697271 | 196    | 200        | -0.54560769 | 81397      | -0.90464564 | 83604      | -0.90585313 | empty        |               |             |                              |                                |
| 2092 E03 | X |        | 714    | 720        | 0.09221302  | 435    | 440        | -0.26741126 | 2745111    | 1.16131712  | 2652095    | 1.04648391  | experimental | Microsource   | 1500515     | Propylthiouracil             |                                |
| 2092 E04 | X |        | 513    | 520        | -0.25992963 | 514    | 520        | -0.17429111 | 2644864    | 1.08956607  | 2452232    | 0.88659483  | experimental | Microsource   | 1500516     | Zomepirac sodium             |                                |
| 2092 E05 | X |        | 274    | 280        | -0.67864652 | 434    | 440        | -0.26857526 | 167900091  | 0.7090091   | 2700937    | 1.08360922  | experimental | Microsource</ |             |                              |                                |

|          |   |        |        |             |             |        |             |             |             |             |             |             |              |             |         |                                       |
|----------|---|--------|--------|-------------|-------------|--------|-------------|-------------|-------------|-------------|-------------|-------------|--------------|-------------|---------|---------------------------------------|
| 2092 F01 | N |        | 516    | 520         | -0.25467377 | 517    | 520         | -0.17196311 | 2188278     | 0.72944033  | 2412182     | 0.86412351  | empty        |             |         |                                       |
| 2092 F02 | E |        | 235    | 240         | -0.74697271 | 236    | 240         | -0.49904761 | 83199       | -0.90324802 | 79927       | -0.90864806 | empty        |             |         |                                       |
| 2092 F03 | X |        | 753    | 760         | 0.16053921  | 554    | 560         | -0.12889504 | 2660371     | 1.09559321  | 2844804     | 1.19296405  | experimental | Microsource | 1501129 | Carbetapentane citrate                |
| 2092 F04 | X |        | 992    | 1000        | 0.5792561   | 874    | 880         | -0.24358554 | 2872007     | 1.2597373   | 3087429     | 1.37358531  | experimental | Microsource | 1501129 | Anisidione                            |
| 2092 F05 | X |        | 714    | 720         | 0.09221302  | 514    | 520         | -0.17545511 | 103994041   | 0.03994011  | 3023551     | 3.28831552  | experimental | Microsource | 1501130 | Fampridine                            |
| 2092 F06 | X |        | 432    | 440         | -0.40183787 | 354    | 360         | -0.3616954  | 2845573     | 1.23923493  | 2408258     | 0.86114084  | experimental | Microsource | 1502202 | Cyclosporine                          |
| 2092 F07 | X | 1034   | 1040   | 0.65283815  | 472         | 480    | -0.22434319 | 3000252     | 1.35920316  | 2927993     | 1.25619688  |             | experimental | Microsource | 1501133 | Nicergoline                           |
| 2092 F08 | X | 588    | 600    | -0.12853312 | 542         | 560    | -0.14286306 | 2947495     | 1.3182851   | 2681228     | 1.06862821  |             | experimental | Microsource | 1502203 | Troleanomycin                         |
| 2092 F09 | X | 634    | 640    | -0.04794326 | 394         | 400    | -0.31513533 | 2849478     | 1.24226362  | 2797576     | 1.15706555  |             | experimental | Microsource | 1501134 | Pimozide                              |
| 2092 F10 | X | 473    | 480    | -0.33000778 | 474         | 480    | -0.22201519 | 2958459     | 1.32678872  | 3037142     | 1.33916219  |             | experimental | Microsource | 1502230 | Ascorbic acid                         |
| 2092 F11 | X | 554    | 560    | -0.18809954 | 595         | 600    | -0.08117097 | 2926338     | 1.30187584  | 2806735     | 1.1640274   |             | experimental | Microsource | 1501137 | Neofepam                              |
| 2092 F12 | X | 674    | 680    | 0.02213488  | 394         | 400    | -0.31513533 | 1964500     | 0.55587928  | 1783213     | 0.38606036  |             | experimental | Microsource | 1502254 | Menadiolone                           |
| 2092 F13 | X | 472    | 480    | -0.33175973 | 595         | 600    | -0.08117097 | 2342498     | 0.84905256  | 2794000     | 1.14324978  |             | experimental | Microsource | 1501138 | Pirenzepine hydrochloride             |
| 2092 F14 | X | 553    | 560    | -0.18985149 | 474         | 480    | -0.22201519 | 2714399     | 1.13749705  | 3041757     | 1.3426701   |             | experimental | Microsource | 1502255 | Salicin                               |
| 2092 F15 | X | 433    | 440    | -0.40008592 | 594         | 600    | -0.08233497 | 2934091     | 1.30788903  | 2567646     | 0.98229333  |             | experimental | Microsource | 1501139 | Pramoxine hydrochloride               |
| 2092 F16 | X | 511    | 520    | -0.26343354 | 313         | 320    | -0.40941948 | 2551308     | 1.01100452  | 2639532     | 1.03693464  |             | experimental | Microsource | 1502258 | Monensin sodium (monensin a is shown) |
| 2092 F17 | X | 709    | 720    | 0.08345325  | 743         | 760    | 0.09110113  | 2560026     | 1.01776615  | 2980227     | 1.29590005  |             | experimental | Microsource | 1501140 | Mephesisin                            |
| 2092 F18 | X | 313    | 320    | -0.61032034 | 634         | 640    | -0.0357749  | 2641025     | 1.08058856  | 3145052     | 1.42118571  |             | experimental | Microsource | 1503001 | Benzoic acid                          |
| 2092 F19 | X | 754    | 760    | 0.16229116  | 513         | 520    | -0.17661911 | 2395501     | 0.89016142  | 2438463     | 0.98409998  |             | experimental | Microsource | 1501142 | Sulfachlorpyridazine                  |
| 2092 F20 | X | 553    | 560    | -0.18985149 | 633         | 640    | -0.0369389  | 2740629     | 1.1578409   | 3015143     | 1.32244051  |             | experimental | Microsource | 1503002 | Benzyd benzoate                       |
| 2092 F21 | X | 592    | 600    | -0.12152531 | 753         | 760    | 0.10274132  | 2522304     | 0.98850917  | 2415645     | 0.86675577  |             | experimental | Microsource | 1501144 | Sulfadimethoxine                      |
| 2092 F22 | X | 750    | 760    | 0.15528335  | 588         | 600    | -0.08931898 | 2635757     | 1.07650272  | 2405928     | 0.85936978  |             | experimental | Microsource | 1503004 | Benzoyl peroxide                      |
| 2092 F23 | E | 511    | 840    | -0.26343354 | 399         | 720    | -0.30931532 | 86540       | -0.90065676 | 83668       | -0.90580449 |             | empty        |             |         |                                       |
| 2092 F24 | P | 110017 | 110560 | 191.585988  | 107790      | 108360 | 124.694002  | 2198663     | 0.73749488  | 2198712     | 0.70186272  |             | empty        |             |         |                                       |
| 2092 G01 | N | 556    | 560    | -0.18489563 | 317         | 320    | -0.40476347 | 2077653     | 0.64364016  | 2046087     | 0.58585085  |             | empty        |             |         |                                       |
| 2092 G02 | E | 196    | 200    | -0.81527775 | 156         | 160    | -0.52167776 | 82170       | -0.90404611 | 7854        | -0.90962428 |             | empty        |             |         |                                       |
| 2092 G03 | N | 354    | 360    | -0.53849024 | 556         | 560    | -0.12650404 | 2623542     | 0.6702883   | 2703318     | 1.08541905  |             | experimental | Microsource | 1500525 | Racephedrine hydrochloride            |
| 2092 G04 | X | 593    | 600    | -0.11977335 | 352         | 360    | -0.3640234  | 2636656     | 1.07719998  | 2724138     | 1.10124455  |             | experimental | Microsource | 1500649 | Theobromine                           |
| 2092 G05 | X | 353    | 360    | -0.5402422  | 393         | 400    | -0.31397133 | 2594103     | 1.0441961   | 2553031     | 0.97118432  |             | experimental | Microsource | 1500526 | Reserpine                             |
| 2092 G06 | X | 555    | 560    | -0.18634759 | 435         | 440    | -0.26973926 | 2751656     | 1.16639339  | 2695525     | 1.07949551  |             | experimental | Microsource | 1500651 | Strychnine                            |
| 2092 G07 | X | 472    | 480    | -0.33175973 | 1394        | 1400   | 0.84886647  | 2611724     | 1.05786265  | 2719352     | 1.09760666  |             | experimental | Microsource | 1500527 | Resorcinol                            |
| 2092 G08 | X | 514    | 520    | -0.25817768 | 551         | 560    | -0.13238705 | 2749016     | 1.16434582  | 2741104     | 1.11414059  |             | experimental | Microsource | 1500663 | Yohimbine hydrochloride               |
| 2092 G09 | X | 594    | 600    | -0.1180214  | 474         | 480    | -0.22201519 | 2932585     | 1.30672098  | 2422541     | 0.8719975   |             | experimental | Microsource | 1500529 | Rifampin                              |
| 2092 G10 | X | 674    | 680    | 0.02213488  | 394         | 400    | -0.31513533 | 1964500     | 0.55587928  | 1783213     | 0.38606036  |             | experimental | Microsource | 1500667 | Acetazolol hydrochloride              |
| 2092 G11 | X | 594    | 600    | -0.1180214  | 354         | 360    | -0.3616954  | 2610159     | 0.05664905  | 2571297     | 0.9850685   |             | experimental | Microsource | 1500530 | Roxarsone                             |
| 2092 G12 | X | 513    | 520    | -0.25992963 | 355         | 360    | -0.3605314  | 2603294     | 1.05132459  | 2728743     | 1.10474486  |             | experimental | Microsource | 1500655 | Acotinine                             |
| 2092 G13 | X | 513    | 520    | -0.25992963 | 355         | 360    | -0.3605314  | 2342716     | 0.84922164  | 2684495     | 1.07111149  |             | experimental | Microsource | 1500531 | Salicyl alcohol                       |
| 2092 G14 | X | 833    | 840    | 0.30069549  | 434         | 440    | -0.26857526 | 2424734     | 0.91283438  | 2885625     | 1.22399252  |             | experimental | Microsource | 1500667 | Adenosine phosphate                   |
| 2092 G15 | X | 511    | 520    | -0.26343354 | 714         | 720    | 0.05734525  | 2330109     | 0.83944372  | 2949634     | 1.27264643  |             | experimental | Microsource | 1500532 | Sulcylamide                           |
| 2092 G16 | X | 1313   | 1320   | 1.14163318  | 594         | 600    | -0.08233497 | 2754559     | 1.16864494  | 2598308     | 1.00559984  |             | experimental | Microsource | 1500668 | Ketotifen fumarate                    |
| 2092 G17 | X | 391    | 400    | -0.47191601 | 554         | 560    | -0.13238705 | 2749016     | 1.16434582  | 2741104     | 1.11414059  |             | experimental | Microsource | 1500533 | Ranididine                            |
| 2092 G18 | X | 555    | 560    | -0.18634759 | 554         | 560    | -0.12889504 | 2624069     | 0.6743757   | 2563042     | 0.97879379  |             | experimental | Microsource | 1500530 | Betahistine hydrochloride             |
| 2092 G19 | X | 513    | 520    | -0.25992963 | 474         | 480    | -0.22201519 | 2646390     | 1.08474962  | 2707429     | 1.08854386  |             | experimental | Microsource | 1500534 | Scopolamine hydrobromide              |
| 2092 G20 | X | 674    | 680    | 0.02213488  | 674         | 680    | 0.01078518  | 2608629     | 1.05546239  | 2636844     | 1.03489146  |             | experimental | Microsource | 1500673 | Molsidomine                           |
| 2092 G21 | X | 711    | 720    | 0.08695716  | 508         | 520    | -0.18243912 | 2428213     | 0.91553267  | 2743749     | 1.11594585  |             | experimental | Microsource | 1500536 | Sisomicin sulfate                     |
| 2092 G22 | X | 1391   | 1400   | 1.27828555  | 2112        | 2120   | 1.68461976  | 2309871     | 0.82374723  | 2432719     | 0.87973339  |             | experimental | Microsource | 1500674 | Misophenolic acid                     |
| 2092 G23 | E | 929    | 1240   | 0.46888303  | 622         | 960    | -0.04974292 | 83285       | -0.90318132 | 82836       | -0.90643629 |             | empty        |             |         |                                       |
| 2092 G24 | P | 10368  | 10433  | 180.489145  | 112367      | 113040 | 130.044918  | 2398178     | 0.89223768  | 218922768   | 0.91261628  |             | empty        |             |         |                                       |
| 2092 H01 | N | 357    | 360    | -0.18284368 | 317         | 320    | -0.40941948 | 2159817     | 0.7073865   | 2613395     | 1.070633    |             | empty        |             |         |                                       |
| 2092 H02 | E | 236    | 240    | -0.74522076 | 197         | 200    | -0.54443668 | 84859       | -0.90196053 | 81257       | -0.90763711 |             | empty        |             |         |                                       |
| 2092 H03 | X | 555    | 560    | -0.18634759 | 393         | 400    | -0.31629933 | 2590991     | 1.04178245  | 2595964     | 1.00381814  |             | experimental | Microsource | 1501145 | Sulfaquinoxaline sodium               |
| 2092 H04 | X | 594    | 600    | -0.1180214  | 913         | 920    | 0.28898161  | 3019037     | 1.3737727   | 2551336     | 0.96898953  |             | experimental | Microsource | 1503007 | Betaine hydrochloride                 |
| 2092 H05 | X | 475    | 480    | -0.32650387 | 514         | 520    | -0.17545511 | 2644216     | 1.08306348  | 2677942     | 1.06613049  |             | experimental | Microsource | 1501146 | Sulfaguandine                         |
| 2092 H06 | X | 274    | 280    | -0.67864652 | 234         | 240    | -0.50137562 | 1195627     | -0.04045463 | 1180632     | -0.0719906  |             | experimental | Microsource | 1502260 | Abametin                              |
| 2092 H07 | X | 714    | 720    | 0.09221302  | 431         | 440    | -0.27206726 | 2932953     | 1.3070064   | 2800498     | 1.15928659  |             | experimental | Microsource | 1501147 | Sulfamonomethoxine                    |
| 2092 H08 | X | 394    | 400    | -0.4684121  | 795         | 800    | 0.15162939  | 2898563     | 1.28033369  | 2911564     | 1.24370903  |             | experimental | Microsource | 1503009 | Biotin                                |
| 2092 H09 | X | 353    | 360    | -0.5402422  | 433         | 440    | -0.26973926 | 1659313     | 0.31917782  | 1763035     | 0.37070005  |             | experimental | Microsource | 1501148 | Sulconazole nitrate                   |
| 2092 H10 | X | 434    | 440    | -0.39833396 | 594         | 600    | -0.08233497 | 3041437     | 1.39114603  | 2844435     | 1.19268357  |             | experimental | Microsource | 1503014 | Aklamide                              |
| 2092 H11 | X | 474    | 480    | -0.32825582 | 514         | 520    | -0.17545511 | 2601754     | 1.05013017  | 2555233     | 0.97285808  |             | experimental | Microsource | 1501149 | Ritodrine hydrochloride               |
| 2092 H12 | X | 594    | 600    | -0.1180214  | 435         | 440    | -0.26741126 | 3061598     | 1.40678279  | 3159275     | 1.43199676  |             | experimental | Microsource | 1503038 | Nicotinyl alcohol tartrate            |
| 2092 H13 | X | 713    | 720    | 0.09046107  | 475         | 480    | -0.22085118 | 2743096     | 1.1597543   | 2814564     | 1.16997831  |             | experimental | Microsource | 1501150 | Sulpiride                             |
| 2092 H14 | X | 793    | 800    | 0.23061735  | 595         | 600    | -0.08117097 | 2703223     | 1.128829    | 3061718     | 1.35784266  |             | experimental | Microsource | 1503059 | Floxuridine                           |
| 2092 H15 | X | 392    | 400    | -0.47191601 | 314         | 320    | -0.40825547 | 2484522     | 0.95920564  | 2717386     | 1.09611228  |             | experimental | Microsource | 1501151 | Ranididine                            |
| 2092 H16 | X | 632    | 640    | -0.05144717 | 434         | 440    | -0.26857526 | 2687911     | 1.1169531   | 2997123     | 1.30874332  |             | experimental | Microsource | 1500684 | Atretamine                            |
| 2092 H17 | X | 554    | 560    | -0.18809954 | 594         | 600    | -0.08233497 | 2127325     | 0.6821655   | 2339733     | 0.80905426  |             | experimental | Microsource | 1501152 | Sipiperone                            |
| 2092 H18 | X | 434    | 440    | -0.39833396 | 433         | 440    | -0.26973926 | 2625646     | 1.06866068  | 2943445     | 1.26794211  |             | experimental | Microsource | 1503069 | Aminohippuric acid                    |
| 2092 H19 | X | 515    | 520    | -0.25642573 | 475         | 480    | -0.22085118 | 2260995     | 0.78583926  | 2266859     | 0.75366197  |             | experimental | Microsource | 1501153 | Sulctodil                             |
| 2092 H20 | X | 434    | 440    | -0.39833396 | 394         | 400    | -0.31513533 | 2380302     | 0.87837315  | 2637564     | 1.03543874  |             | experimental | Microsource | 1501150 | Mefloquine                            |
| 2092 H21 | X | 433    | 440    | -0.40008592 | 591         | 600    | -0.08582697 | 2407102     | 0.89915909  | 2448393     | 0.89164787  |             | experimental | Microsource | 1501157 | Ronidazole                            |
| 2092 H22 | X | 550    | 560    | -0.1933554  | 720         | 730    | 0.05036124  | 2580728     | 1.03382252  | 2740576     | 1.11373925  |             | experimental | Microsource | 1503073 | Adiphenine hydrochloride              |
| 2092 H23 | X | 519    | 520    | -0.24941917 | 536         | 540    | -0.14984707 | 83977       | 0.90264461  | 8234        | -0.90061315 |             | empty        |             |         |                                       |
| 2092 H24 | P | 107474 | 1      |             |             |        |             |             |             |             |             |             |              |             |         |                                       |

|          |   |        |        |             |       |       |             |         |             |         |             |              |             |         |                               |
|----------|---|--------|--------|-------------|-------|-------|-------------|---------|-------------|---------|-------------|--------------|-------------|---------|-------------------------------|
| 2092 I19 | X | 474    | 480    | -0.32825582 | 394   | 400   | -0.31513533 | 2630195 | 1.07218887  | 2928498 | 1.25658074  | experimental | Microsource | 1500548 | Sulfamethazine                |
| 2092 I20 | X | 593    | 600    | -0.11977335 | 472   | 480   | -0.22434319 | 2622504 | 1.06622377  | 2756830 | 1.12609408  | experimental | Microsource | 1500689 | Lidocaine hydrochloride       |
| 2092 I21 | X | 754    | 760    | 0.16229116  | 1314  | 1320  | 0.75574633  | 2510225 | 0.97914076  | 3009632 | 1.31825155  | experimental | Microsource | 1500549 | Sulfamethazine                |
| 2092 I22 | X | 471    | 480    | -0.33511658 | 550   | 560   | -0.12355105 | 2306371 | 0.82103265  | 2610789 | 1.01508438  | experimental | Microsource | 1500561 | Phentolamine hydrochloride    |
| 2092 I23 | E | 612    | 960    | 0.08648624  | 473   | 760   | -0.22317919 | 80604   | -0.96526069 | 1069699 | -0.90806125 | empty        |             |         |                               |
| 2092 I24 | P | 117258 | 117840 | 204.271884  | 96061 | 96680 | 111.041425  | 2310314 | 0.82409082  | 2214856 | 0.71413394  | empty        |             |         |                               |
| 2092 J01 | N | 556    | 560    | -0.18459563 | 277   | 280   | -0.45132354 | 2247650 | 0.77548895  | 2180334 | 0.68789341  | empty        |             |         |                               |
| 2092 J02 | E | 316    | 320    | -0.60506448 | 317   | 320   | -0.40476347 | 82366   | -0.90389409 | 81797   | -0.90722665 | empty        |             |         |                               |
| 2092 J03 | X | 354    | 360    | -0.53849024 | 394   | 400   | -0.31513533 | 2529909 | 0.99440756  | 2461012 | 0.90123971  | experimental | Microsource | 1501155 | Sulfamer                      |
| 2092 J04 | X | 553    | 560    | -0.18985149 | 353   | 360   | -0.3628594  | 2523668 | 0.98956708  | 2711556 | 1.09168084  | experimental | Microsource | 1503076 | Quinapril hydrochloride       |
| 2092 J05 | X | 594    | 600    | -0.1180214  | 555   | 560   | -0.12773104 | 2822505 | 1.2213435   | 2734465 | 1.10909421  | experimental | Microsource | 1501156 | Sulfamethoxypridazine         |
| 2092 J06 | X | 671    | 680    | 0.01687906  | 470   | 480   | -0.22657119 | 2773063 | 1.18299655  | 2656217 | 1.05751463  | experimental | Microsource | 1503083 | Amipriose                     |
| 2092 J07 | X | 792    | 800    | 0.2288654   | 433   | 440   | -0.26973926 | 2915756 | 1.2936685   | 2992507 | 1.30523465  | experimental | Microsource | 1501161 | Suprofen                      |
| 2092 J08 | X | 394    | 400    | -0.4684121  | 315   | 320   | -0.40709147 | 2838155 | 1.23348156  | 2927886 | 1.25611555  | experimental | Microsource | 1503086 | Tiaprofen hydrochloride       |
| 2092 J09 | X | 473    | 480    | -0.33000778 | 394   | 400   | -0.31513533 | 3010484 | 1.36713904  | 2971779 | 1.28947908  | experimental | Microsource | 1501171 | Saccharin                     |
| 2092 J10 | X | 554    | 560    | -0.18809954 | 514   | 520   | -0.17545511 | 2743685 | 1.16021112  | 2941264 | 1.26628431  | experimental | Microsource | 1503092 | Glucosylactone                |
| 2092 J11 | X | 635    | 640    | -0.04619131 | 513   | 520   | -0.17661911 | 2837590 | 1.23304335  | 2884240 | 1.22293977  | experimental | Microsource | 1501173 | Acetanilide                   |
| 2092 J12 | X | 472    | 480    | -0.33175973 | 794   | 800   | 0.15046539  | 2844841 | 1.23866719  | 3066109 | 1.36118031  | experimental | Microsource | 1503101 | Azlocillin sodium             |
| 2092 J13 | X | 594    | 600    | -0.1180214  | 633   | 640   | -0.0369389  | 2704151 | 1.12959476  | 2593205 | 1.0011721   | experimental | Microsource | 1501175 | Flurandrenolide               |
| 2092 J14 | X | 513    | 520    | -0.25992963 | 713   | 720   | 0.05618125  | 2652231 | 1.08927987  | 2811478 | 1.1676326   | experimental | Microsource | 1503102 | Bacampicillin hydrochloride   |
| 2092 J15 | X | 632    | 640    | -0.05144717 | 513   | 520   | -0.17661911 | 2504377 | 0.97460508  | 3069036 | 1.36340515  | experimental | Microsource | 1501176 | Erythromycin estolate         |
| 2092 J16 | X | 834    | 840    | 0.30244744  | 755   | 760   | 0.10506932  | 2547798 | 1.00828218  | 3011777 | 1.31988198  | experimental | Microsource | 1503104 | Bendroflumethiazide           |
| 2092 J17 | X | 433    | 440    | -0.40008592 | 393   | 400   | -0.31629933 | 2529774 | 0.99430286  | 2911749 | 1.24384965  | experimental | Microsource | 1501179 | Estradiol propionate          |
| 2092 J18 | X | 433    | 440    | -0.40008592 | 554   | 560   | -0.12889504 | 2299979 | 0.81607505  | 2403675 | 0.85765725  | experimental | Microsource | 1503106 | Bepidril hydrochloride        |
| 2092 J19 | X | 554    | 560    | -0.18809954 | 554   | 560   | -0.12889504 | 2629284 | 1.0714823   | 2720023 | 1.0981167   | experimental | Microsource | 1501182 | Estradiol benzoate            |
| 2092 J20 | X | 474    | 480    | 0.02212488  | 534   | 540   | -0.08349874 | 2795750 | 1.3023505   | 2657331 | 1.06189311  | experimental | Microsource | 1503107 | Thioridazine hydrochloride    |
| 2092 J21 | X | 551    | 560    | -0.1933554  | 430   | 440   | -0.17323126 | 2264577 | 0.78295325  | 2399593 | 0.84799093  | experimental | Microsource | 1501184 | Estradiol acetate             |
| 2092 J22 | X | 807    | 840    | 0.2551447   | 754   | 800   | 0.10390532  | 2617261 | 1.06215732  | 2425997 | 0.87462444  | experimental | Microsource | 1503110 | Carmustine                    |
| 2092 J23 | E | 606    | 880    | -0.09699796 | 552   | 840   | -0.13122304 | 81164   | -0.90482636 | 81220   | -0.90766524 | empty        |             |         |                               |
| 2092 J24 | P | 91360  | 92000  | 158.899791  | 96352 | 96880 | 111.380149  | 2257789 | 0.7833527   | 2247485 | 0.73893559  | empty        |             |         |                               |
| 2092 K01 | N | 715    | 720    | 0.09396498  | 470   | 480   | -0.22667119 | 2163547 | 0.7102591   | 2083280 | 0.61412164  | empty        |             |         |                               |
| 2092 K02 | E | 195    | 200    | -0.81705085 | 195   | 200   | -0.54677169 | 84880   | -0.90194425 | 79527   | -0.9089521  | empty        |             |         |                               |
| 2092 K03 | X | 435    | 440    | -0.39658201 | 595   | 600   | -0.08117097 | 3176255 | 1.49571017  | 2850721 | 1.19746162  | experimental | Microsource | 1500550 | Sulfamethoxazole              |
| 2092 K04 | X | 435    | 440    | -0.39658201 | 595   | 600   | -0.08117097 | 3176255 | 1.49571017  | 2850721 | 1.19746162  | experimental | Microsource | 1500550 | Sulfamethoxazole              |
| 2092 K05 | X | 546    | 560    | -0.20211517 | 350   | 360   | -0.36635141 | 2719002 | 1.14106711  | 2785260 | 1.14770403  | experimental | Microsource | 1500551 | Sulfapyridine                 |
| 2092 K06 | X | 1513   | 1520   | 1.49202388  | 1714  | 1720  | 1.22134705  | 2463463 | 0.94287239  | 2610001 | 1.01448782  | experimental | Microsource | 1500767 | Butamben                      |
| 2092 K07 | X | 630    | 640    | -0.05495107 | 791   | 800   | 0.14697339  | 3002274 | 1.36077141  | 2860638 | 1.1634976   | experimental | Microsource | 1500552 | Sulfasalazine                 |
| 2092 K08 | X | 514    | 520    | -0.25817768 | 554   | 560   | -0.12889504 | 2610667 | 1.05704305  | 2782845 | 1.14586836  | experimental | Microsource | 1500771 | Cefaclor                      |
| 2092 K09 | X | 512    | 520    | -0.26168159 | 554   | 560   | -0.12889504 | 2909016 | 1.28844099  | 3504169 | 1.69415432  | experimental | Microsource | 1500553 | Sulfathiazole                 |
| 2092 K10 | X | 434    | 440    | -0.39833396 | 714   | 720   | 0.05734525  | 2727861 | 1.14793811  | 2751410 | 1.12197429  | experimental | Microsource | 1500772 | Idopamide                     |
| 2092 K11 | X | 914    | 920    | 0.61201229  | 534   | 540   | -0.26857526 | 3438837 | 1.69921229  | 2655904 | 1.04937917  | experimental | Microsource | 1500554 | Tolazamide                    |
| 2092 K12 | X | 914    | 920    | 0.61201229  | 534   | 540   | -0.26857526 | 3438837 | 1.69921229  | 2655904 | 1.04937917  | experimental | Microsource | 1500554 | Tolazamide                    |
| 2092 K13 | X | 432    | 440    | -0.40183787 | 433   | 440   | -0.26973926 | 3075459 | 1.41753331  | 3201061 | 1.46375874  | experimental | Microsource | 1500555 | Sulfisoxazole                 |
| 2092 K14 | X | 554    | 560    | -0.18809954 | 874   | 880   | 0.24358554  | 2477557 | 0.95380362  | 2323109 | 0.79641819  | experimental | Microsource | 1500778 | Liothyronine                  |
| 2092 K15 | X | 553    | 560    | -0.18985149 | 513   | 520   | -0.17661911 | 3112492 | 1.44625592  | 3274742 | 1.51976445  | experimental | Microsource | 1500556 | Sulindac                      |
| 2092 K16 | X | 554    | 560    | -0.18809954 | 553   | 560   | -0.13005904 | 2611307 | 1.05753943  | 2910824 | 1.24314654  | experimental | Microsource | 1500801 | Allantoin                     |
| 2092 K17 | X | 472    | 480    | -0.33175973 | 515   | 520   | -0.17429111 | 2356327 | 0.85977827  | 2199481 | 0.70244724  | experimental | Microsource | 1500557 | Tamoxifen citrate             |
| 2092 K18 | X | 995    | 1000   | 0.58451186  | 434   | 440   | -0.26857526 | 2795750 | 1.20058316  | 2958381 | 0.97129083  | experimental | Microsource | 1500558 | Thiazidiazole                 |
| 2092 K19 | X | 392    | 400    | -0.47191001 | 553   | 560   | -0.13005904 | 4098694 | 1.45446603  | 3188824 | 1.45446603  | experimental | Microsource | 1500558 | Terbutaline hemisulfate       |
| 2092 K20 | X | 513    | 520    | -0.25992963 | 792   | 800   | 0.14813739  | 2778502 | 1.18721501  | 2799111 | 1.15199941  | experimental | Microsource | 1500807 | Adenine                       |
| 2092 K21 | X | 688    | 720    | 0.04666223  | 794   | 840   | 0.15046539  | 2453794 | 0.93537317  | 3239667 | 1.49310357  | experimental | Microsource | 1500564 | Tetracaine hydrochloride      |
| 2092 K22 | X | 9551   | 9560   | 15.5742262  | 14149 | 14160 | 15.6957094  | 2473984 | 0.95103242  | 2411003 | 0.86322734  | experimental | Microsource | 1500810 | Aminacrine                    |
| 2092 K23 | E | 511    | 840    | -0.26343354 | 868   | 1160  | 0.23660152  | 82314   | -0.90393442 | 84160   | -0.90543051 | empty        |             |         |                               |
| 2092 K24 | P | 101714 | 102280 | 177.039518  | 84399 | 85000 | 97.466836   | 2458730 | 0.9392015   | 2399026 | 0.8541235   | empty        |             |         |                               |
| 2092 L01 | N | 835    | 840    | 0.3041994   | 2875  | 2880  | 0.52725314  | 2485021 | 0.95959266  | 2269449 | 0.75563066  | empty        |             |         |                               |
| 2092 L02 | E | 195    | 200    | -0.81705085 | 229   | 240   | -0.50719563 | 83677   | -0.90287729 | 78578   | -0.90967345 | empty        |             |         |                               |
| 2092 L03 | X | 475    | 480    | -0.32650387 | 515   | 520   | -0.17429111 | 1781718 | 0.41411451  | 1471078 | 0.14878046  | experimental | Microsource | 1501185 | Econazole nitrate             |
| 2092 L04 | X | 429    | 440    | -0.40709373 | 393   | 400   | -0.31629933 | 2912188 | 1.29090117  | 2881869 | 1.22113754  | experimental | Microsource | 1503111 | Ceftriaxone sodium trihydrate |
| 2092 L05 | X | 1753   | 1760   | 1.91249273  | 715   | 720   | 0.05850925  | 2475204 | 0.95197865  | 2518957 | 0.94528431  | experimental | Microsource | 1501187 | Flunisolide                   |
| 2092 L06 | X | 586    | 600    | -0.13203703 | 430   | 440   | -0.27323126 | 3246549 | 1.55022983  | 3149379 | 1.42444741  | experimental | Microsource | 1503115 | Xylazine                      |
| 2092 L07 | X | 592    | 600    | -0.12152531 | 512   | 520   | -0.17778312 | 2442464 | 0.92658568  | 2502894 | 0.93307466  | experimental | Microsource | 1501200 | Xylazine                      |
| 2092 L08 | X | 352    | 360    | -0.54199415 | 393   | 400   | -0.31629933 | 2806116 | 1.20863228  | 3057346 | 1.35451946  | experimental | Microsource | 1503117 | Trimipramine maleate          |
| 2092 L09 | X | 1234   | 1240   | 1.00322885  | 471   | 480   | -0.22550719 | 2557731 | 1.01598616  | 2655904 | 1.04937917  | experimental | Microsource | 1501201 | Tolazamide                    |
| 2092 L10 | X | 512    | 520    | -0.26168159 | 553   | 560   | -0.13005904 | 2523712 | 0.9896012   | 2410137 | 0.86256909  | experimental | Microsource | 1503118 | Trifluoroacetyl hydrochloride |
| 2092 L11 | X | 594    | 600    | -0.1180214  | 473   | 480   | -0.22317919 | 2845949 | 1.23952655  | 2646547 | 1.04226682  | experimental | Microsource | 1501202 | Galanthamine hydrobromide     |
| 2092 L12 | X | 672    | 680    | 0.01863097  | 554   | 560   | -0.12889504 | 3380829 | 1.6543767   | 2966921 | 1.28578646  | experimental | Microsource | 1503121 | Trazodone hydrochloride       |
| 2092 L13 | X | 634    | 640    | -0.04794326 | 274   | 280   | -0.45481555 | 2406264 | 0.89850914  | 2412744 | 0.86455069  | experimental | Microsource | 1501203 | Retinol                       |
| 2092 L14 | X | 553    | 560    | -0.18985149 | 514   | 520   | -0.17545511 | 2868305 | 1.25686575  | 3356651 | 1.58202434  | experimental | Microsource | 1503134 | Menthyl(-)                    |
| 2092 L15 | X | 594    | 600    | -0.1180214  | 474   | 480   | -0.22201519 | 2147529 | 0.69783652  | 2079254 | 0.61106144  | experimental | Microsource | 1501205 | Lanatoside c                  |
| 2092 L16 | X | 554    | 560    | -0.18809954 | 554   | 560   | -0.12889504 | 3120130 | 1.45217991  | 2435583 | 1.10994402  | experimental | Microsource | 1503135 | Thiozylamine hydrochloride    |
| 2092 L17 | X | 675    | 680    | 0.02388684  | 394   | 400   | -0.31513533 | 2484622 | 0.9592832   | 2471491 | 0.90204931  | experimental | Microsource | 1501214 | Enalapril maleate             |
| 2092 L18 | X | 432    | 440    | -0.40183787 | 474   | 480   | -0.22201519 | 2901608 | 1.28269538  | 2848758 | 1.19596952  | experimental | Microsource | 1503136 | Thiamphenicol                 |
| 2092 L19 | X | 554    | 560    | -0.18809954 | 672   | 680   | 0.00845717  | 2309100 | 0.82314925  | 2475161 |             |              |             |         |                               |

|          |   |        |        |             |        |        |             |         |             |         |             |              |             |         |                                  |
|----------|---|--------|--------|-------------|--------|--------|-------------|---------|-------------|---------|-------------|--------------|-------------|---------|----------------------------------|
| 2092 M13 | X | 273    | 280    | -0.68039848 | 555    | 560    | -0.12773104 | 2133543 | 0.68698815  | 2020193 | 0.56616855  | experimental | Microsource | 1500575 | Thioridazine hydrochloride       |
| 2092 M14 | X | 515    | 520    | -0.25642573 | 553    | 560    | -0.13005904 | 2489160 | 0.96280285  | 2158950 | 0.94527899  | experimental | Microsource | 1500839 | Cinchonidine                     |
| 2092 M15 | X | 514    | 520    | -0.25817768 | 474    | 480    | -0.22201519 | 2161619 | 0.70876375  | 2349055 | 0.81614002  | experimental | Microsource | 1500576 | Thiothixene                      |
| 2092 M16 | X | 394    | 400    | -0.46841121 | 674    | 680    | -0.17545511 | 2550609 | 1.01046238  | 2617013 | 1.01981771  | experimental | Microsource | 1500814 | Cinchonine                       |
| 2092 M17 | X | 394    | 400    | 0.46841121  | 474    | 480    | 0.01078518  | 2453221 | 0.77368259  | 2677713 | 0.94433874  | experimental | Microsource | 1500579 | Tibramycin                       |
| 2092 M18 | X | 474    | 480    | -0.32825582 | 672    | 680    | 0.00845717  | 2427155 | 0.91471209  | 2813014 | 1.16880013  | experimental | Microsource | 1500844 | Coenzym b12                      |
| 2092 M19 | X | 552    | 560    | -0.19160345 | 913    | 920    | 0.28898161  | 2386122 | 0.88288711  | 2565128 | 0.98037938  | experimental | Microsource | 1500580 | Tolazoline hydrochloride         |
| 2092 M20 | X | 1113   | 1120   | 0.79124247  | 612    | 520    | -0.17778312 | 2454379 | 0.93582689  | 2723925 | 1.10108265  | experimental | Microsource | 1500847 | Cholesterol                      |
| 2092 M21 | X | 627    | 640    | -0.06020693 | 530    | 640    | -0.0404309  | 2204955 | 0.74237493  | 2352646 | 0.81886957  | experimental | Microsource | 1500581 | Tolbutamide                      |
| 2092 M22 | X | 2111   | 2120   | 2.53969208  | 1710   | 1720   | 1.21669104  | 2371854 | 0.87182093  | 2349368 | 0.81637793  | experimental | Microsource | 1500873 | Piperine                         |
| 2092 M23 | E | 649    | 1000   | -0.02166396 | 625    | 1040   | -0.04625091 | 83079   | -0.90334109 | 81554   | -0.90741136 | empty        |             |         |                                  |
| 2092 M24 | P | 116344 | 117000 | 202.670598  | 138840 | 139600 | 160.836258  | 240870  | 0.77023042  | 2405274 | 0.77156333  | empty        |             |         |                                  |
| 2092 N01 | N | 1035   | 1040   | 0.6545901   | 755    | 760    | 0.10506932  | 1969001 | 0.55937023  | 1968329 | 0.52674618  | empty        |             |         |                                  |
| 2092 N02 | E | 194    | 200    | -0.81880281 | 275    | 280    | -0.45365154 | 77420   | -0.90773018 | 73902   | -0.91322773 | empty        |             |         |                                  |
| 2092 N03 | X | 514    | 520    | -0.25817768 | 554    | 360    | -0.3616954  | 2616261 | 1.06138173  | 2366296 | 0.82924508  | experimental | Microsource | 1502004 | Bumetanide                       |
| 2092 N04 | X | 552    | 560    | -0.19160345 | 313    | 520    | -0.17661911 | 1992989 | 0.5779752   | 2205898 | 0.70732487  | experimental | Microsource | 1503202 | Chloroxine                       |
| 2092 N05 | X | 513    | 520    | -0.25992963 | 632    | 640    | -0.0381029  | 2595405 | 1.04520592  | 2575300 | 0.98811578  | experimental | Microsource | 1502005 | Chlorobenzoxolone sodium         |
| 2092 N06 | X | 432    | 440    | -0.04183787 | 513    | 520    | -0.17661911 | 1923409 | 0.52400931  | 2011572 | 0.55961563  | experimental | Microsource | 1503203 | Chloroprothixene hydrochloride   |
| 2092 N07 | X | 792    | 800    | 0.2288654   | 552    | 560    | -0.13122304 | 2471309 | 0.94895771  | 2405274 | 0.95887267  | experimental | Microsource | 1502013 | Isotretinoin                     |
| 2092 N08 | X | 513    | 520    | -0.25992963 | 473    | 480    | -0.22317919 | 2589040 | 1.04026926  | 2223496 | 0.7207013   | experimental | Microsource | 1503204 | Cinnarazine                      |
| 2092 N09 | X | 471    | 480    | -0.33351168 | 511    | 520    | -0.17894712 | 2569455 | 1.02507924  | 2705885 | 1.08737025  | experimental | Microsource | 1502104 | Mesna                            |
| 2092 N10 | X | 1152   | 1160   | 0.85956866  | 591    | 600    | -0.08582697 | 2157781 | 0.70578702  | 2167202 | 0.67791164  | experimental | Microsource | 1503207 | Cyclobenzaprine hydrochloride    |
| 2092 N11 | X | 1231   | 1240   | 0.99797299  | 1433   | 1440   | 0.89426254  | 2753314 | 1.16767932  | 2384906 | 0.84339074  | experimental | Microsource | 1502016 | Tretinoin                        |
| 2092 N12 | X | 592    | 600    | -0.12152531 | 391    | 400    | -0.31862733 | 2463212 | 0.94267772  | 1939521 | 0.50484891  | experimental | Microsource | 1503209 | Dantrolene sodium                |
| 2092 N13 | X | 634    | 640    | -0.04794326 | 473    | 480    | -0.22317919 | 2650002 | 1.08755107  | 2317553 | 0.79219501  | experimental | Microsource | 1502018 | Bretylium tosylate               |
| 2092 N14 | X | 513    | 520    | -0.25992963 | 634    | 640    | -0.28898161 | 2220825 | 0.75463362  | 2057416 | 0.37290636  | experimental | Microsource | 1503205 | Tamethasonone 17,21-dipropionate |
| 2092 N15 | X | 713    | 720    | 0.09046107  | 591    | 600    | -0.08582697 | 2295916 | 0.001595    | 2587840 | 0.99764301  | experimental | Microsource | 1502019 | Foscarnet sodium                 |
| 2092 N16 | X | 634    | 640    | -0.04794326 | 474    | 480    | -0.22201519 | 2217458 | 0.75207219  | 2372467 | 0.83393572  | experimental | Microsource | 1503212 | Dobutamine hydrochloride         |
| 2092 N17 | X | 473    | 480    | -0.33000778 | 512    | 520    | -0.1778312  | 2524469 | 0.99018833  | 2609811 | 1.0143434   | experimental | Microsource | 1502020 | Folic acid                       |
| 2092 N18 | X | 633    | 640    | -0.04969521 | 833    | 840    | -0.19586146 | 2093304 | 0.65577899  | 2589777 | 0.99911534  | experimental | Microsource | 1503214 | Edoxudine                        |
| 2092 N19 | X | 591    | 600    | -0.12327726 | 591    | 600    | -0.08582697 | 2348640 | 0.85381627  | 2844741 | 1.19291616  | experimental | Microsource | 1502021 | Phthalylsulfathiazole            |
| 2092 N20 | X | 751    | 760    | 0.1570353   | 554    | 560    | -0.12889504 | 2185957 | 0.72764018  | 2544124 | 0.96441402  | experimental | Microsource | 1503215 | Enoxacin                         |
| 2092 N21 | X | 632    | 640    | -0.05144717 | 553    | 560    | -0.13005904 | 2424094 | 0.912338    | 2377079 | 0.83744135  | experimental | Microsource | 1502025 | Succinylsulfathiazole            |
| 2092 N22 | X | 624    | 640    | -0.06546279 | 624    | 640    | -0.06546279 | 2087811 | 0.75151763  | 2583698 | 0.79088764  | experimental | Microsource | 1503221 | Ethisterone                      |
| 2092 N23 | E | 797    | 1160   | 0.23762516  | 670    | 1120   | 0.00612917  | 80489   | -0.90534988 | 78669   | -0.90960428 | empty        |             |         |                                  |
| 2092 N24 | P | 122281 | 122960 | 213.071946  | 151053 | 152040 | 175.052212  | 2289479 | 0.8079313   | 2262495 | 0.75034485  | empty        |             |         |                                  |
| 2092 O01 | N | 794    | 800    | 0.2323693   | 475    | 480    | -0.22085118 | 2062939 | 0.63222805  | 1892568 | 0.46915944  | empty        |             |         |                                  |
| 2092 O02 | E | 314    | 320    | -0.60856838 | 315    | 320    | -0.40709147 | 80230   | -0.90555076 | 75714   | -0.91185041 | empty        |             |         |                                  |
| 2092 O03 | X | 713    | 720    | 0.09046107  | 634    | 640    | -0.0357749  | 2434594 | 0.92048174  | 2507823 | 0.93682124  | experimental | Microsource | 1500582 | Tolmetin sodium                  |
| 2092 O04 | X | 873    | 880    | 0.37077363  | 792    | 800    | 0.14813739  | 2150393 | 0.70005692  | 2268474 | 0.75488955  | experimental | Microsource | 1500903 | Etoposide                        |
| 2092 O05 | X | 590    | 600    | -0.1745782  | 612    | 620    | -0.1745782  | 2465508 | 0.9445584   | 2352464 | 0.95234642  | experimental | Microsource | 1500583 | Tolmetin sodium                  |
| 2092 O06 | X | 633    | 640    | -0.04969521 | 671    | 680    | 0.00729317  | 2303020 | 0.81843363  | 2114340 | 0.63773067  | experimental | Microsource | 1500907 | Dehydrolic acid                  |
| 2092 O07 | X | 752    | 760    | 0.15878726  | 830    | 840    | 0.19236946  | 2322147 | 0.83326843  | 2368300 | 0.82737065  | experimental | Microsource | 1500584 | Tranlycypromine sulfate          |
| 2092 O08 | X | 632    | 640    | -0.05144717 | 473    | 480    | -0.22317919 | 2340730 | 0.84768131  | 2131949 | 0.65111546  | experimental | Microsource | 1500992 | Flumequine                       |
| 2092 O09 | X | 672    | 680    | 0.01863097  | 473    | 480    | -0.22317919 | 2420555 | 0.90959317  | 2341470 | 0.81037458  | experimental | Microsource | 1500585 | Triacetin                        |
| 2092 O10 | X | 631    | 640    | -0.05319912 | 673    | 680    | 0.00962117  | 2204952 | 0.74237216  | 2034530 | 0.57706625  | experimental | Microsource | 1500993 | Flunarizine hydrochloride        |
| 2092 O11 | X | 711    | 720    | 0.08695716  | 669    | 680    | 0.00496517  | 2137762 | 0.69026039  | 2451993 | 0.89438427  | experimental | Microsource | 1500586 | Triamcinolone                    |
| 2092 O12 | X | 354    | 360    | -0.54024262 | 634    | 640    | -0.0357749  | 1743788 | 0.38469619  | 1309415 | 0.32925882  | experimental | Microsource | 1500994 | Fluphenazine hydrochloride       |
| 2092 O13 | X | 513    | 520    | -0.25992963 | 673    | 680    | 0.00962117  | 2204952 | 0.89048329  | 2384680 | 0.84716666  | experimental | Microsource | 1500587 | Triamcinolone acetonide          |
| 2092 O14 | X | 592    | 600    | -0.12152531 | 670    | 680    | 0.00612917  | 2138805 | 0.69106933  | 2312964 | 0.78870687  | experimental | Microsource | 1500995 | Flutamide                        |
| 2092 O15 | X | 792    | 800    | 0.2288654   | 1073   | 1080   | 0.47522189  | 2633703 | 1.07490965  | 2465141 | 0.90437821  | experimental | Microsource | 1500588 | Triamcinolone diacetate          |
| 2092 O16 | X | 591    | 600    | -0.12327726 | 551    | 560    | -0.13238705 | 2091923 | 0.65470789  | 2332262 | 0.80337548  | experimental | Microsource | 1501002 | Droperidol                       |
| 2092 O17 | X | 793    | 800    | 0.23061735  | 914    | 920    | 0.29014561  | 7144938 | 4.57380012  | 6295992 | 3.81624837  | experimental | Microsource | 1500589 | Triamterene                      |
| 2092 O18 | X | 711    | 720    | 0.08695716  | 511    | 520    | -0.17894712 | 2232817 | 0.76400006  | 2244133 | 0.7363877   | experimental | Microsource | 1501003 | Famotidine                       |
| 2092 O19 | X | 1152   | 1160   | 0.85956866  | 673    | 680    | 0.00962117  | 2412464 | 0.90331783  | 2764450 | 1.13188613  | experimental | Microsource | 1500590 | Trichlormethiazide               |
| 2092 O20 | X | 589    | 600    | -0.12678117 | 513    | 520    | -0.17661911 | 2220611 | 0.75451764  | 2583698 | 0.99449463  | experimental | Microsource | 1501005 | Etodolac                         |
| 2092 O21 | X | 590    | 600    | -0.12502921 | 469    | 480    | -0.22783519 | 1319496 | 0.05561752  | 1446134 | 0.12982026  | experimental | Microsource | 1500591 | Trifluoperazine hydrochloride    |
| 2092 O22 | X | 1432   | 1440   | 1.35011565  | 869    | 880    | 0.23776553  | 2085231 | 0.64951761  | 2206484 | 0.70777703  | experimental | Microsource | 1501007 | Fenoterol hydrobromide           |
| 2092 O23 | E | 572    | 920    | -0.15656438 | 850    | 1440   | 0.21564949  | 79790   | -0.90589202 | 77964   | -0.91014016 | empty        |             |         |                                  |
| 2092 O24 | P | 115546 | 116400 | 201.272539  | 198930 | 200040 | 230.781126  | 2019248 | 0.59834154  | 2243605 | 0.73598636  | empty        |             |         |                                  |
| 2092 P01 | N | 837    | 840    | 0.3077033   | 598    | 600    | -0.07767896 | 1640717 | 0.30475486  | 1565682 | 0.22068995  | empty        |             |         |                                  |
| 2092 P02 | E | 195    | 200    | -0.81705085 | 276    | 280    | -0.45248754 | 75569   | -0.90916581 | 72661   | -0.91417102 | empty        |             |         |                                  |
| 2092 P03 | X | 596    | 600    | -0.11451749 | 516    | 520    | -0.17312711 | 2015844 | 0.59570142  | 2015362 | 0.56249645  | experimental | Microsource | 1502026 | Tranexamic acid                  |
| 2092 P04 | X | 433    | 440    | -0.40008592 | 435    | 440    | -0.26741126 | 1287683 | 0.03094352  | 1161400 | -0.08660221 | experimental | Microsource | 1503223 | Parosaraniline pamoate           |
| 2092 P05 | X | 875    | 880    | 0.37427754  | 554    | 560    | -0.12889504 | 2168486 | 0.71408976  | 2094943 | 0.62298681  | experimental | Microsource | 1502028 | Cephalexin                       |
| 2092 P06 | X | 434    | 440    | -0.39833396 | 551    | 560    | -0.13238705 | 2019345 | 0.59841677  | 2175396 | 0.68413998  | experimental | Microsource | 1503227 | Perhexiline maleate              |
| 2092 P07 | X | 715    | 720    | 0.09396498  | 1874   | 1880   | 1.40758734  | 2244395 | 0.77296439  | 2118605 | 0.64097254  | experimental | Microsource | 1502029 | Cefsulodin sodium                |
| 2092 P08 | X | 634    | 640    | -0.04794326 | 675    | 680    | 0.00729317  | 2416077 | 0.90612006  | 2219516 | 0.71767606  | experimental | Microsource | 1503229 | Methapyrilene hydrochloride      |
| 2092 P09 | X | 875    | 880    | 0.37427754  | 671    | 680    | 0.01194918  | 2205981 | 0.74317069  | 2014458 | 0.56180931  | experimental | Microsource | 1502030 | Oxolinic acid                    |
| 2092 P10 | X | 514    | 520    | -0.39833396 | 513    | 520    | -0.16619111 | 1217978 | -0.02311391 | 1193306 | 0.06235696  | experimental | Microsource | 1503239 | Hycaonitine                      |
| 2092 P11 | X | 715    | 720    | 0.09396498  | 1035   | 1040   | 0.43098983  | 2152612 | 0.7078271   | 1200442 | 0.62716666  | experimental | Microsource | 1502031 | Cefamandole sodium               |
| 2092 P12 | X | 714    | 720    | 0.09221302  | 433    | 440    | -0.26973926 | 2311335 | 0.8248827   | 2130814 | 0.65025273  | experimental | Microsource | 1503234 | Beta-proiolactone                |
| 2092 P13 | X | 914    | 920    | 0.44260373  | 754    | 760    | 0.1039053   |         |             |         |             |              |             |         |                                  |

|          |   |        |        |             |        |        |             |         |             |         |             |              |             |         |                                     |
|----------|---|--------|--------|-------------|--------|--------|-------------|---------|-------------|---------|-------------|--------------|-------------|---------|-------------------------------------|
| 2093 A07 | X | 316    | 320    | -0.46830557 | 436    | 440    | -0.32037849 | 1675688 | 0.30493004  | 1970256 | 0.46152404  | experimental | Microsource | 1503253 | Methylbenzethonium chloride         |
| 2093 A08 | X | 556    | 560    | -0.03224995 | 475    | 480    | -0.25674639 | 2119095 | 0.6426045   | 2288181 | 0.69175168  | experimental | Microsource | 1504148 | Mepivacaine hydrochloride           |
| 2093 A09 | X | 595    | 600    | 0.03860909  | 956    | 960    | 0.52804952  | 2011891 | 0.56096381  | 2500076 | 0.84519694  | experimental | Microsource | 1503255 | Methylprednisolone sodium succinate |
| 2093 A10 | X | 716    | 720    | 0.2584538   | 355    | 360    | -0.42523747 | 2281553 | 0.7666236   | 2605094 | 0.48657523  | experimental | Microsource | 1504152 | Miliumamide                         |
| 2093 A11 | X | 515    | 520    | -0.10674278 | 356    | 360    | -0.45090588 | 1588169 | 0.23545037  | 1453452 | 0.6828538   | experimental | Microsource | 1503256 | Amtracaine                          |
| 2093 A12 | X | 675    | 680    | 0.18396097  | 392    | 400    | -0.39216855 | 2255731 | 0.74665898  | 1873430 | 0.39140681  | experimental | Microsource | 1504171 | Vanflaxine                          |
| 2093 A13 | X | 636    | 640    | 0.11310193  | 1836   | 1840   | 1.96385077  | 2196277 | 0.70138208  | 1969541 | 0.46100627  | experimental | Microsource | 1503257 | Midoxifene hydrochloride            |
| 2093 A14 | X | 315    | 320    | -0.47012247 | 391    | 400    | -0.39380014 | 1818930 | 0.41401529  | 2050619 | 0.51971948  | experimental | Microsource | 1504172 | Citalopram                          |
| 2093 A15 | X | 556    | 560    | -0.03224995 | 676    | 680    | 0.07120367  | 2113858 | 0.63861628  | 2432759 | 0.79644886  | experimental | Microsource | 1503260 | Nadolol                             |
| 2093 A16 | X | 355    | 360    | -0.39744653 | 595    | 600    | -0.06095531 | 1699829 | 0.3233145   | 2442572 | 0.80355501  | experimental | Microsource | 1504173 | Fluoxetine                          |
| 2093 A17 | X | 676    | 680    | 0.18577786  | 635    | 640    | 0.00430838  | 2277929 | 0.76356376  | 2245950 | 0.6611698   | experimental | Microsource | 1503262 | Naltrexone hydrochloride            |
| 2093 A18 | X | 714    | 720    | 0.11258482  | 594    | 600    | -0.06258669 | 1980765 | 0.53725995  | 248845  | 0.83692634  | experimental | Microsource | 1504174 | Bupropion                           |
| 2093 A19 | X | 835    | 840    | 0.47466471  | 754    | 760    | 0.19846787  | 1953927 | 0.5168216   | 2453105 | 0.81118255  | experimental | Microsource | 1503263 | Cyclothiazide                       |
| 2093 A20 | X | 631    | 640    | 0.10401743  | 870    | 880    | 0.38773258  | 2172048 | 0.6829306   | 2814138 | 1.07262715  | experimental | Microsource | 1504175 | Cefuroxime axetil                   |
| 2093 A21 | X | 1475   | 1480   | 1.63747971  | 1714   | 1720   | 1.7647965   | 1532970 | 0.19624384  | 1590672 | 0.18664561  | experimental | Microsource | 1503265 | Nicosamide                          |
| 2093 A22 | X | 670    | 680    | 0.17487647  | 989    | 1000   | 0.58189207  | 2085848 | 0.6172854   | 2324599 | 0.71812403  | experimental | Microsource | 1504179 | Fexofenadine hydrochloride          |
| 2093 A23 | E | 754    | 1200   | 0.32749594  | 656    | 1080   | 0.03857182  | 77762   | -0.91196278 | 78697   | -0.90826176 | empty        |             |         |                                     |
| 2093 A24 | P | 152009 | 152360 | 275.142468  | 143812 | 144240 | 233.610803  | 1568452 | 0.22326498  | 1886737 | 0.40104317  | empty        |             |         |                                     |
| 2093 B01 | N | 357    | 360    | -0.39381273 | 516    | 520    | -0.1988511  | 1813444 | 0.40983746  | 2283348 | 0.68823182  | empty        |             |         |                                     |
| 2093 B02 | E | 157    | 160    | -0.75719242 | 276    | 280    | -0.58143326 | 80167   | -0.91013127 | 81598   | -0.90616098 | empty        |             |         |                                     |
| 2093 B03 | X | 316    | 320    | -0.46830557 | 436    | 440    | -0.32037849 | 2412042 | 0.86596987  | 2597470 | 0.91572549  | experimental | Microsource | 1505305 | Pefloxacin mesylate                 |
| 2093 B04 | X | 316    | 320    | -0.46830557 | 354    | 360    | -0.45416906 | 2243339 | 0.73722191  | 2202607 | 0.62978266  | experimental | Microsource | 1505622 | Rifaxime hydrochloride              |
| 2093 B05 | X | 355    | 360    | -0.39744653 | 395    | 400    | -0.38727378 | 2300556 | 0.78079524  | 2566890 | 0.89358077  | experimental | Microsource | 1505306 | Alaroxane dihydrochloride           |
| 2093 B06 | X | 394    | 400    | -0.32658749 | 354    | 360    | -0.45416906 | 2483428 | 0.92006653  | 2861269 | 1.1067574   | experimental | Microsource | 1505636 | Zimelidine dihydrochloride          |
| 2093 B07 | X | 315    | 320    | -0.47012247 | 355    | 360    | -0.45253747 | 1968008 | 0.52754492  | 2425141 | 0.79993223  | experimental | Microsource | 1505308 | Chlorophyllide cu complex na salt   |
| 2093 B08 | X | 440    | 440    | 0.25391156  | 475    | 480    | -0.25391156 | 2463197 | 0.9046531   | 3093216 | 0.27407211  | experimental | Microsource | 1505637 | Ipefodopamide proxetil              |
| 2093 B09 | X | 514    | 520    | -0.10855968 | 592    | 600    | -0.06585009 | 1904323 | 0.47904592  | 2255613 | 0.66816733  | experimental | Microsource | 1505299 | Bifonazole                          |
| 2093 B10 | X | 394    | 400    | -0.32658749 | 474    | 480    | -0.25837798 | 2412739 | 0.86622767  | 2826369 | 1.08148432  | experimental | Microsource | 1505650 | Aminopentamide                      |
| 2093 B11 | X | 275    | 280    | -0.54279841 | 555    | 560    | -0.126219   | 2890322 | 1.22992869  | 2949743 | 1.17082647  | experimental | Microsource | 1505312 | Tylosin tartrate                    |
| 2093 B12 | X | 395    | 400    | -0.32477059 | 514    | 520    | -0.19311429 | 2817629 | 1.17456969  | 3105898 | 1.28390721  | experimental | Microsource | 1505652 | Arsenic acid                        |
| 2093 B13 | X | 513    | 520    | -0.11037658 | 550    | 560    | -0.13437697 | 2596218 | 1.00595521  | 2735682 | 1.01581268  | experimental | Microsource | 1505314 | Sarrafloxacin hydrochloride         |
| 2093 B14 | X | 555    | 560    | -0.03406685 | 514    | 520    | -0.19311429 | 3033088 | 1.33865145  | 3156923 | 1.32085733  | experimental | Microsource | 1505656 | Panthenol                           |
| 2093 B15 | X | 674    | 680    | 0.18214407  | 514    | 520    | -0.19311429 | 2723553 | 1.10292656  | 3124799 | 1.29759451  | experimental | Microsource | 1505319 | Clopidol                            |
| 2093 B16 | X | 440    | 440    | 0.25391156  | 475    | 480    | -0.25391156 | 2463197 | 0.9046531   | 3093216 | 0.27407211  | experimental | Microsource | 1505661 | Nimetozine                          |
| 2093 B17 | X | 354    | 360    | -0.39926343 | 593    | 600    | -0.0642185  | 2211555 | 0.71301966  | 2783659 | 1.05055557  | experimental | Microsource | 1505321 | Rifaximin                           |
| 2093 B18 | X | 528    | 560    | -0.0831231  | 648    | 680    | 0.02551908  | 2417612 | 0.86993867  | 2770216 | 1.04082072  | experimental | Microsource | 1505665 | Phthalylsulfathiazole               |
| 2093 B19 | X | 472    | 480    | -0.18486941 | 431    | 440    | -0.32853645 | 2434362 | 0.88269456  | 2275916 | 0.68286989  | experimental | Microsource | 1505327 | Chloramidine acetate                |
| 2093 B20 | X | 833    | 840    | 0.47103092  | 993    | 1000   | 0.58841844  | 2843584 | 1.19433559  | 2437176 | 0.79964746  | experimental | Microsource | 1505668 | Ronnel                              |
| 2093 B21 | X | 470    | 480    | -0.18850321 | 348    | 360    | -0.46395861 | 1391319 | 0.08883702  | 1486025 | 0.11086474  | experimental | Microsource | 1505330 | Oxicanazole nitrate                 |
| 2093 B22 | X | 712    | 720    | 0.25118621  | 951    | 960    | 0.51989156  | 2139970 | 0.65880175  | 2410843 | 0.78057823  | experimental | Microsource | 1505672 | Vincristine sulfate                 |
| 2093 B23 | E | 604    | 660    | 0.05494537  | 766    | 840    | 0.05494537  | 84649   | 0.9671802   | 484949  | 0.90262565  | empty        |             |         |                                     |
| 2093 B24 | P | 119301 | 120040 | 215.715354  | 145943 | 146680 | 237.087726  | 2163533 | 0.67544004  | 2339528 | 0.72893877  | empty        |             |         |                                     |
| 2093 C01 | N | 277    | 280    | -0.53916461 | 397    | 400    | -0.38401059 | 2162010 | 0.67528621  | 2013249 | 0.49265773  | empty        |             |         |                                     |
| 2093 C02 | E | 157    | 160    | -0.75719242 | 276    | 280    | -0.58143326 | 77540   | -0.91213184 | 82886   | -0.90522827 | empty        |             |         |                                     |
| 2093 C03 | X | 397    | 400    | -0.3211368  | 315    | 320    | -0.51780116 | 2971434 | 1.29169914  | 2207352 | 0.63321878  | experimental | Microsource | 1503267 | Nomifensine maleate                 |
| 2093 C04 | X | 475    | 480    | -0.17941872 | 636    | 640    | 0.00593998  | 2534866 | 0.95923289  | 2351099 | 0.73731419  | experimental | Microsource | 1504190 | Avobezone                           |
| 2093 C05 | X | 395    | 400    | -0.32477059 | 394    | 400    | -0.38890537 | 2737522 | 1.11356459  | 2436347 | 0.79904713  | experimental | Microsource | 1503269 | Pergolide mesylate                  |
| 2093 C06 | X | 440    | 440    | 0.25391156  | 475    | 480    | -0.25391156 | 2463197 | 0.9046531   | 3093216 | 0.27407211  | experimental | Microsource | 1504815 | Ammoniolevulinic acid hydrochloride |
| 2093 C07 | X | 474    | 480    | -0.18123562 | 514    | 520    | -0.19311429 | 2880004 | 1.22209924  | 3047328 | 1.24106688  | experimental | Microsource | 1503270 | Pirlicaine hydrochloride            |
| 2093 C08 | X | 515    | 520    | -0.10674278 | 354    | 360    | -0.45416906 | 2689373 | 0.70689695  | 2787597 | 1.0534073   | experimental | Microsource | 1504188 | Pirenperone                         |
| 2093 C09 | X | 554    | 560    | -0.03588374 | 675    | 680    | 0.06957208  | 2679662 | 1.06950159  | 3153868 | 1.31864503  | experimental | Microsource | 1503273 | Hydrocortisone butyrate             |
| 2093 C10 | X | 595    | 600    | 0.03860909  | 514    | 520    | -0.19311429 | 2421634 | 0.87300611  | 2209108 | 0.6344904   | experimental | Microsource | 1504210 | Atovaquone                          |
| 2093 C11 | X | 355    | 360    | -0.39744653 | 434    | 440    | -0.32364167 | 2845784 | 1.19601099  | 2461490 | 0.81725461  | experimental | Microsource | 1503276 | Ritonavir                           |
| 2093 C12 | X | 354    | 360    | -0.39926343 | 394    | 400    | -0.38890537 | 2727543 | 1.10596513  | 2266129 | 0.67578256  | experimental | Microsource | 1504211 | Chloroquinidone hydrochloride       |
| 2093 C13 | X | 755    | 760    | 0.32931284  | 594    | 600    | -0.06258669 | 1920672 | 0.49149642  | 1671583 | 0.24523788  | experimental | Microsource | 1503278 | Mitoxanthrone hydrochloride         |
| 2093 C14 | X | 314    | 320    | -0.47193937 | 673    | 680    | 0.06530889  | 2964871 | 1.28670112  | 2992658 | 1.20190367  | experimental | Microsource | 1504774 | Trimetozine                         |
| 2093 C15 | X | 394    | 400    | -0.32658749 | 473    | 480    | -0.26009557 | 2519812 | 0.94776859  | 3093719 | 1.27508771  | experimental | Microsource | 1503279 | Oxethazaine                         |
| 2093 C16 | X | 515    | 520    | -0.10674278 | 593    | 600    | -0.0642185  | 2633479 | 1.03433115  | 2762163 | 1.03498909  | experimental | Microsource | 1504216 | Zoxazolamine                        |
| 2093 C17 | X | 449    | 480    | -0.22665808 | 568    | 600    | -0.1050083  | 2540955 | 0.96386994  | 3054264 | 1.24651609  | experimental | Microsource | 1503298 | Dipyron                             |
| 2093 C18 | X | 9434   | 9440   | 16.0981743  | 9273   | 9280   | 14.0980029  | 2737030 | 1.11318991  | 2478712 | 0.82972604  | experimental | Microsource | 1504218 | Arsinorcin                          |
| 2093 C19 | X | 607    | 640    | 0.06041187  | 689    | 720    | 0.09241437  | 2914539 | 1.24837103  | 2977177 | 1.19069299  | experimental | Microsource | 1503301 | Sulfanilic acid zinc                |
| 2093 C20 | X | 713    | 720    | 0.25300311  | 632    | 640    | -0.00058639 | 2241517 | 0.73583438  | 2327415 | 0.72016325  | experimental | Microsource | 1504226 | Cysteamine hydrochloride            |
| 2093 C21 | X | 513    | 520    | -0.11037658 | 594    | 600    | -0.06258669 | 2538335 | 0.96187469  | 2939152 | 1.16135692  | experimental | Microsource | 1503304 | Urethane                            |
| 2093 C22 | X | 672    | 680    | 0.17851027  | 630    | 640    | -0.00384958 | 2258956 | 0.74911497  | 2628401 | 0.93812439  | experimental | Microsource | 1504229 | Metaxalone                          |
| 2093 C23 | E | 578    | 880    | 0.00772182  | 796    | 1120   | 0.26699475  | 81433   | -0.90916715 | 86473   | -0.90263072 | empty        |             |         |                                     |
| 2093 C24 | P | 101235 | 101880 | 182.891267  | 108400 | 109160 | 175.832855  | 2365995 | 0.830663    | 2510967 | 0.85308373  | empty        |             |         |                                     |
| 2093 D01 | N | 357    | 360    | -0.39381273 | 277    | 280    | -0.57980167 | 1999460 | 0.55149704  | 2494501 | 0.84115976  | empty        |             |         |                                     |
| 2093 D02 | E | 317    | 320    | -0.46648867 | 237    | 240    | -0.64506336 | 82388   | -0.90843987 | 84624   | -0.90396988 | empty        |             |         |                                     |
| 2093 D03 | X | 235    | 240    | -0.61547434 | 475    | 480    | -0.25674639 | 2731423 | 1.10891992  | 2753619 | 1.02880169  | experimental | Microsource | 1505332 | Azaperone                           |
| 2093 D04 | X | 440    | 440    | 0.25027176  | 395    | 400    | -0.38727378 | 2550896 | 0.9395241   | 3934424 | 1.41825718  | experimental | Microsource | 1505373 | Flotizone                           |
| 2093 D05 | X | 315    | 320    | -0.47012247 | 315    | 320    | -0.51780116 | 2014836 | 0.86320656  | 2087916 | 0.5401181   | experimental | Microsource | 1505340 | Azetastine hydrochloride            |
| 2093 D06 | X | 434    | 440    | -0.25391156 | 434    | 440    | -0.32364167 | 2562365 | 0.98017462  | 2928563 | 1.15548882  | experimental | Microsource | 1505675 | Trientine hydrochloride             |
| 2093 D07 | X | 715    | 720    | 0.2566369   | 594    | 600    | -0.06258669 | 3597618 | 1.768       |         |             |              |             |         |                                     |

|          |   |        |        |             |       |       |             |         |             |         |             |              |             |         |                               |  |  |  |  |
|----------|---|--------|--------|-------------|-------|-------|-------------|---------|-------------|---------|-------------|--------------|-------------|---------|-------------------------------|--|--|--|--|
| 2093 E01 | N | 437    | 440    | -0.24846086 | 437   | 440   | -0.3187469  | 2219059 | 0.7187316   | 2030674 | 0.50527616  | empty        |             |         |                               |  |  |  |  |
| 2093 E02 | E | 236    | 240    | -0.61365744 | 156   | 160   | -0.77722434 | 83384   | -0.90768137 | 86386   | -0.90269372 | empty        |             |         |                               |  |  |  |  |
| 2093 E03 | X | 396    | 400    | -0.3229537  | 596   | 600   | -0.05932372 | 2431544 | 0.88054852  | 2445306 | 0.80553485  | experimental |             |         |                               |  |  |  |  |
| 2093 E04 | X | 394    | 400    | -0.47012247 | 394   | 400   | -0.38890537 | 2627722 | 1.02994693  | 2118679 | 0.56900561  | experimental | Microsource | 1503322 | Thiram                        |  |  |  |  |
| 2093 E05 | X | 436    | 440    | -0.25027776 | 436   | 440   | -0.25027776 | 2759026 | 1.12996066  | 2623075 | 0.93426753  | experimental | Microsource | 1504235 | Rifedoxil                     |  |  |  |  |
| 2093 E06 | X | 434    | 440    | -0.25391156 | 474   | 280   | -0.58469645 | 2679993 | 1.06975366  | 2395484 | 0.7694559   | experimental | Microsource | 1504236 | Nicotinamide                  |  |  |  |  |
| 2093 E07 | X | 634    | 640    | 0.10946813  | 274   | 480   | -0.25837798 | 3205632 | 1.4700515   | 3428148 | 1.51726683  | experimental | Microsource | 1503330 | Simvastatin                   |  |  |  |  |
| 2093 E08 | X | 555    | 560    | -0.03406685 | 635   | 640   | 0.00430838  | 2554517 | 0.97419802  | 2718827 | 1.00360702  | experimental | Microsource | 1504237 | Quinacrine                    |  |  |  |  |
| 2093 E09 | X | 355    | 360    | -0.39744653 | 434   | 440   | -0.32364167 | 2886610 | 1.22710183  | 2980768 | 1.19329344  | experimental | Microsource | 1503339 | Hydroquinone                  |  |  |  |  |
| 2093 E10 | X | 516    | 520    | -0.10492588 | 395   | 400   | -0.38727378 | 2690349 | 1.07764022  | 2657119 | 0.95892073  | experimental | Microsource | 1504243 | Sulfanilamide                 |  |  |  |  |
| 2093 E11 | X | 394    | 400    | -0.32658749 | 513   | 520   | -0.19474588 | 3295861 | 1.53876496  | 2882943 | 1.122452078 | experimental | Microsource | 1503393 | Oxcarbazepine                 |  |  |  |  |
| 2093 E12 | X | 675    | 680    | 0.18396097  | 515   | 520   | -0.1914827  | 2523227 | 0.95501469  | 2382362 | 0.69104273  | experimental | Microsource | 1504257 | Pipobroman                    |  |  |  |  |
| 2093 E13 | X | 394    | 400    | -0.32658749 | 394   | 400   | -0.38890537 | 3237822 | 1.49456564  | 2844179 | 1.09438155  | experimental | Microsource | 1503412 | Carvedilol                    |  |  |  |  |
| 2093 E14 | X | 595    | 600    | 0.03860909  | 593   | 600   | -0.0642185  | 2976696 | 1.29570639  | 3040214 | 1.23634168  | experimental | Microsource | 1504258 | Etanidazole                   |  |  |  |  |
| 2093 E15 | X | 434    | 440    | -0.25391156 | 593   | 600   | -0.0642185  | 3032369 | 1.3381039   | 3075087 | 1.26159521  | experimental | Microsource | 1503419 | Nafrolin                      |  |  |  |  |
| 2093 E16 | X | 434    | 440    | -0.25391156 | 513   | 520   | -0.19474588 | 2450518 | 0.89499808  | 2455034 | 0.81257945  | experimental | Microsource | 1504259 | Irbesartan                    |  |  |  |  |
| 2093 E17 | X | 674    | 680    | 0.18214407  | 752   | 760   | 0.19520468  | 2677451 | 1.06781781  | 2988621 | 1.19898025  | experimental | Microsource | 1503420 | Quipazine maleate             |  |  |  |  |
| 2093 E18 | X | 632    | 640    | 0.10583433  | 712   | 720   | 0.12994099  | 2778130 | 1.14448942  | 2867470 | 1.11124789  | experimental | Microsource | 1504260 | Levofloxacin                  |  |  |  |  |
| 2093 E19 | X | 673    | 680    | 0.18032717  | 512   | 520   | -0.19637747 | 3051177 | 1.35242704  | 2582664 | 0.90500362  | experimental | Microsource | 1503421 | Ritanserin                    |  |  |  |  |
| 2093 E20 | X | 832    | 840    | 0.46921402  | 792   | 800   | 0.26046838  | 2614119 | 1.01958763  | 2728457 | 1.01058065  | experimental | Microsource | 1504261 | Candesartan cilextil          |  |  |  |  |
| 2093 E21 | X | 753    | 760    | 0.32567904  | 1432  | 1440  | 1.30468747  | 2509068 | 0.93958655  | 3007480 | 1.21263712  | experimental | Microsource | 1504262 | Semustine                     |  |  |  |  |
| 2093 E22 | X | 472    | 480    | -0.18486941 | 590   | 600   | -0.06911327 | 2359286 | 0.82552079  | 2637248 | 0.94466136  | experimental | Microsource | 1504268 | Losartan                      |  |  |  |  |
| 2093 E23 | E | 495    | 760    | -0.14308075 | 517   | 760   | -0.18821951 | 86117   | -0.90560007 | 90464   | -0.89974061 | empty        |             |         |                               |  |  |  |  |
| 2093 E24 | P | 88394  | 89808  | 159.560474  | 89814 | 81520 | 130.986099  | 2298070 | 0.77890814  | 2567191 | 0.89379874  | empty        |             |         |                               |  |  |  |  |
| 2093 F01 | N | 477    | 480    | -0.17578492 | 437   | 440   | -0.3187469  | 2131875 | 0.65233704  | 2758480 | 0.90197375  | empty        |             |         |                               |  |  |  |  |
| 2093 F02 | E | 196    | 200    | -0.68633338 | 196   | 200   | -0.68633338 | 84325   | -0.90647676 | 8384    | -0.90453255 | empty        |             |         |                               |  |  |  |  |
| 2093 F03 | X | 476    | 480    | -0.1776582  | 435   | 440   | -0.32201008 | 2531301 | 0.95651798  | 2812952 | 1.0717683   | experimental | Microsource | 1505374 | Vardenafil hydrochloride      |  |  |  |  |
| 2093 F04 | X | 275    | 280    | -0.54279841 | 475   | 480   | -0.25674639 | 2616065 | 1.02106996  | 2752513 | 1.02800097  | experimental | Microsource | 1505803 | Pravastatin sodium            |  |  |  |  |
| 2093 F05 | X | 434    | 440    | -0.25391156 | 514   | 520   | -0.19311429 | 2854828 | 1.20289841  | 3104177 | 1.28266094  | experimental | Microsource | 1505376 | Acedapone                     |  |  |  |  |
| 2093 F06 | X | 434    | 440    | -0.25391156 | 755   | 760   | 0.20009946  | 3045899 | 1.3484076   | 3173983 | 1.33321145  | experimental | Microsource | 1505805 | Gabapentin                    |  |  |  |  |
| 2093 F07 | X | 515    | 520    | -0.10674278 | 514   | 520   | -0.19311429 | 2945348 | 1.27183347  | 2847994 | 1.09714421  | experimental | Microsource | 1505384 | Methylglutamate hydrochloride |  |  |  |  |
| 2093 F08 | X | 435    | 440    | -0.25209466 | 393   | 400   | -0.39053696 | 2857238 | 1.20473373  | 3201425 | 1.35308377  | experimental | Microsource | 1505814 | Metformin hydrochloride       |  |  |  |  |
| 2093 F09 | X | 316    | 320    | -0.4630557  | 795   | 800   | 0.26536315  | 2820489 | 1.17674771  | 3140094 | 1.30867049  | experimental | Microsource | 1505385 | Atomoxetine hydrochloride     |  |  |  |  |
| 2093 F10 | X | 545    | 550    | -0.15429185 | 392   | 400   | -0.39216864 | 2896179 | 0.9921556   | 2982156 | 1.0446922   | experimental | Microsource | 1505391 | Pravastatin sodium            |  |  |  |  |
| 2093 F11 | X | 555    | 560    | -0.03406685 | 955   | 960   | 0.52641793  | 2395293 | 0.85294175  | 2596856 | 0.91528086  | experimental | Microsource | 1505387 | Duloxetine hydrochloride      |  |  |  |  |
| 2093 F12 | X | 514    | 520    | -0.10855968 | 433   | 440   | -0.32527327 | 2924572 | 1.25601161  | 3335153 | 1.44992384  | experimental | Microsource | 1505817 | Ramelteon                     |  |  |  |  |
| 2093 F13 | X | 354    | 360    | -0.39926343 | 474   | 480   | -0.25837798 | 2376442 | 0.83858586  | 2933558 | 1.15910599  | experimental | Microsource | 1505389 | Tramadol hydrochloride        |  |  |  |  |
| 2093 F14 | X | 554    | 560    | -0.03588374 | 634   | 640   | 0.00267679  | 2700291 | 1.0852115   | 3299798 | 1.42432127  | experimental | Microsource | 1505818 | Pantoprazole                  |  |  |  |  |
| 2093 F15 | X | 395    | 400    | -0.32477059 | 513   | 520   | -0.19474588 | 2458165 | 0.90082162  | 2659530 | 0.96066668  | experimental | Microsource | 1505390 | Nisoldipine                   |  |  |  |  |
| 2093 F16 | X | 314    | 320    | -0.47193937 | 433   | 440   | -0.32527327 | 3212155 | 1.47501906  | 3308085 | 1.23479995  | experimental | Microsource | 1505819 | Eletriptan hydrobromide       |  |  |  |  |
| 2093 F17 | X | 593    | 600    | -0.12770654 | 712   | 720   | 0.12994099  | 2778130 | 1.14448942  | 2867470 | 1.11124789  | experimental | Microsource | 1505391 | Thalidomide                   |  |  |  |  |
| 2093 F18 | X | 983    | 1000   | 0.76173467  | 789   | 800   | 0.2555737   | 642622  | 0.93515558  | 6869301 | 4.00302027  | experimental | Microsource | 1505820 | Tobacatin hydrochloride       |  |  |  |  |
| 2093 F19 | X | 431    | 440    | -0.25936225 | 873   | 880   | 0.39262736  | 2406951 | 0.86181984  | 2495267 | 0.84171446  | experimental | Microsource | 1505393 | Desloratadine                 |  |  |  |  |
| 2093 F20 | X | 832    | 840    | 0.46921402  | 510   | 520   | -0.19964066 | 2959158 | 1.28235041  | 2920418 | 1.14959056  | experimental | Microsource | 1505391 | Sitagliptin                   |  |  |  |  |
| 2093 F21 | X | 671    | 680    | 0.17669337  | 871   | 880   | 0.38936417  | 4938439 | 2.78966229  | 5346861 | 2.90671639  | experimental | Microsource | 1505396 | Fluorescein                   |  |  |  |  |
| 2093 F22 | X | 792    | 800    | -0.06748168 | 591   | 600   | -0.06748168 | 2425344 | 0.87582694  | 2556407 | 0.88598943  | experimental | Microsource | 1505851 | Aripiprazole                  |  |  |  |  |
| 2093 F23 | E | 564    | 960    | -0.01771476 | 561   | 840   | -0.11642945 | 83914   | -0.90727776 | 90649   | -0.89960664 | empty        |             |         |                               |  |  |  |  |
| 2093 F24 | P | 137000 | 134200 | 241.876867  | 93327 | 93800 | 151.239864  | 2341186 | 0.81173682  | 2600118 | 0.77925664  | empty        |             |         |                               |  |  |  |  |
| 2093 G01 | N | 440    | 440    | -0.24846086 | 357   | 360   | -0.44927428 | 2171905 | 0.5680219   | 2210754 | 0.5680219   | empty        |             |         |                               |  |  |  |  |
| 2093 G02 | E | 115    | 120    | -0.83350215 | 197   | 200   | -0.71032906 | 77577   | -0.91210367 | 82198   | -0.90572649 | empty        |             |         |                               |  |  |  |  |
| 2093 G03 | X | 435    | 440    | -0.25209466 | 356   | 360   | -0.45090588 | 2564810 | 0.9820366   | 2325930 | 0.71908788  | experimental | Microsource | 1503423 | Spiramycin                    |  |  |  |  |
| 2093 G04 | X | 354    | 360    | -0.39926343 | 435   | 360   | -0.45253747 | 2677825 | 1.06810263  | 2257744 | 0.66971051  | experimental | Microsource | 1504269 | Lithium citrate               |  |  |  |  |
| 2093 G05 | X | 794    | 800    | 0.40017188  | 355   | 440   | -0.32201008 | 2836838 | 1.18919821  | 2849211 | 1.09802551  | experimental | Microsource | 1503428 | Choline chloride              |  |  |  |  |
| 2093 G06 | X | 554    | 560    | -0.03588374 | 354   | 360   | -0.45416906 | 2865441 | 1.21098069  | 3133483 | 1.30388309  | experimental | Microsource | 1504272 | Gatifloxacin                  |  |  |  |  |
| 2093 G07 | X | 354    | 360    | -0.39926343 | 395   | 400   | -0.38727378 | 3038291 | 1.34261377  | 3261270 | 1.39642095  | experimental | Microsource | 1503429 | Clofibrate                    |  |  |  |  |
| 2093 G08 | X | 475    | 480    | -0.17941872 | 435   | 440   | -0.32201008 | 2828506 | 1.18028301  | 3193150 | 1.34709137  | experimental | Microsource | 1504273 | Miglitol                      |  |  |  |  |
| 2093 G09 | X | 355    | 360    | -0.39744653 | 393   | 400   | -0.39053696 | 2652897 | 1.04911883  | 3035746 | 1.23310615  | experimental | Microsource | 1503500 | Resorcinol monoacetate        |  |  |  |  |
| 2093 G10 | X | 314    | 320    | -0.47193937 | 515   | 520   | -0.1914827  | 2724809 | 1.10388307  | 2818193 | 1.07556361  | experimental | Microsource | 1504300 | Orlistat                      |  |  |  |  |
| 2093 G11 | X | 395    | 400    | -0.32477059 | 433   | 440   | -0.32527327 | 2624919 | 1.02781232  | 2683607 | 0.97810221  | experimental | Microsource | 1503600 | Nimodipine                    |  |  |  |  |
| 2093 G12 | X | 515    | 520    | -0.10674278 | 395   | 400   | -0.38727378 | 2954503 | 1.27880542  | 3045901 | 1.24045996  | experimental | Microsource | 1504303 | Moxifloxacin hydrochloride    |  |  |  |  |
| 2093 G13 | X | 434    | 440    | -0.25391156 | 434   | 440   | -0.32364167 | 2627427 | 1.02972227  | 2770969 | 1.04136601  | experimental | Microsource | 1503604 | Retinyl palmitate             |  |  |  |  |
| 2093 G14 | X | 554    | 560    | -0.03588374 | 594   | 600   | -0.0625869  | 2632825 | 1.03383309  | 2757638 | 1.03171228  | experimental | Microsource | 1504401 | Pioglitazone hydrochloride    |  |  |  |  |
| 2093 G15 | X | 434    | 440    | -0.25391156 | 593   | 600   | -0.0642185  | 3086492 | 1.37932101  | 2990716 | 1.20049736  | experimental | Microsource | 1503607 | Thalidomide                   |  |  |  |  |
| 2093 G16 | X | 755    | 760    | 0.32931284  | 634   | 640   | 0.00267679  | 2558364 | 0.97712768  | 2835525 | 1.0881147   | experimental | Microsource | 1504402 | Tolterodine tartrate          |  |  |  |  |
| 2093 G17 | X | 552    | 560    | -0.03951754 | 709   | 720   | 0.12504621  | 2848719 | 1.19824613  | 3026008 | 1.22605431  | experimental | Microsource | 1503609 | Nitrendipine                  |  |  |  |  |
| 2093 G18 | X | 633    | 640    | 0.10765123  | 1313  | 1320  | 1.11052798  | 2345557 | 0.81506554  | 2748198 | 1.02487623  | experimental | Microsource | 1504403 | Donepezil hydrochloride       |  |  |  |  |
| 2093 G19 | X | 674    | 680    | 0.18214407  | 430   | 440   | -0.33016804 | 1828901 | 0.42160866  | 2       |             |              |             |         |                               |  |  |  |  |

|          |   |        |        |             |             |        |             |             |             |              |             |            |              |             |         |                              |
|----------|---|--------|--------|-------------|-------------|--------|-------------|-------------|-------------|--------------|-------------|------------|--------------|-------------|---------|------------------------------|
| 2093 H19 | X |        | 434    | 440         | -0.25391156 | 544    | 560         | -0.14416652 | 2580826     | 0.99423351   | 2545580     | 0.87814898 | experimental | Microsource | 1505417 | Capoebnic acid               |
| 2093 H20 | X |        | 473    | 480         | -0.18305252 | 3832   | 3840        | 5.22050905  | 2658815     | 1.05362565   | 3433974     | 1.52148577 | experimental | Microsource | 1505957 | Arsenic trioxide             |
| 2093 H21 | X |        | 593    | 600         | 0.03497529  | 763    | 680         | 0.04999297  | 2772601     | 1.14027883   | 2619693     | 0.93181843 | experimental | Microsource | 1505425 | Acetohexamide                |
| 2093 H22 | X |        | 750    | 760         | 0.32386214  | 671    | 750         | 0.32386214  | 2514022     | 0.94359224   | 2752330     | 1.03293755 | experimental | Microsource | 1505111 | Clonazepam                   |
| 2093 H23 | E |        | 581    | 582         | 0.01317251  | 656    | 1040        | 0.20173105  | 84496       | -0.906883454 | 87434       | -0.9019348 | empty        |             |         |                              |
| 2093 H24 | P | 114198 | 114680 | 206.443721  | 94803       | 95400  | 153.648095  | 2515038     | 0.94413297  | 2444076      | 0.80464414  |            | empty        |             |         |                              |
| 2093 I01 | N |        | 317    | 320         | -0.46648867 | 477    | 480         | -0.2534832  | 2323881     | 0.79855829   | 2282365     | 0.68753998 | empty        |             |         |                              |
| 2093 I02 | E | 195    | 200    | -0.68815028 | 196         | 160    | -0.77722434 | 78202       | -0.9116277  | 81539        | -0.90620371 |            | empty        |             |         |                              |
| 2093 I03 | X | 434    | 440    | -0.25391156 | 355         | 400    | -0.38727378 | 2676518     | 1.06710729  | 2592063      | 0.91180997  |            | experimental | Microsource | 1503614 | Ciprofloxacin                |
| 2093 I04 | X | 354    | 360    | -0.39926343 | 432         | 440    | -0.32690486 | 2606986     | 1.01415553  | 2328075      | 0.72095403  |            | experimental | Microsource | 1505024 | Olanzapine                   |
| 2093 I05 | X | 834    | 840    | 0.47284782  | 1235        | 1240   | 0.98326378  | 2615763     | 1.02083961  | 2746420      | 1.02358868  |            | experimental | Microsource | 1503650 | Nabumetone                   |
| 2093 I06 | X | 434    | 440    | -0.25391156 | 313         | 320    | -0.52106435 | 2370037     | 0.83370816  | 2751417      | 0.8598546   |            | experimental | Microsource | 1505111 | Tiostrepton                  |
| 2093 I07 | X | 395    | 400    | -0.32477059 | 515         | 520    | -0.1914827  | 2593449     | 1.00384649  | 3906437      | 1.86362318  |            | experimental | Microsource | 1503678 | Celecoxib                    |
| 2093 I08 | X | 515    | 520    | -0.10674278 | 393         | 400    | -0.39053696 | 2571315     | 0.98699045  | 3315653      | 1.43580278  |            | experimental | Microsource | 1505112 | Timilcosin                   |
| 2093 I09 | X | 392    | 400    | -0.33022129 | 513         | 520    | -0.19474588 | 2341147     | 0.81170712  | 3132539      | 1.30319948  |            | experimental | Microsource | 1503705 | Anethole                     |
| 2093 I10 | X | 1033   | 1040   | 0.8344106   | 874         | 880    | 0.39425895  | 2650519     | 1.04730787  | 2747676      | 1.02449822  |            | experimental | Microsource | 1505113 | Flunixin meglumine           |
| 2093 I11 | X | 553    | 560    | -0.03770064 | 473         | 480    | -0.26000957 | 2429721     | 0.87916023  | 1944633      | 0.44296897  |            | experimental | Microsource | 1503708 | Terfenadine                  |
| 2093 I12 | X | 675    | 680    | 0.18396097  | 394         | 400    | -0.38890537 | 2690335     | 1.07762956  | 2273021      | 0.68077345  |            | experimental | Microsource | 1505114 | Cloiquinol                   |
| 2093 I13 | X | 353    | 360    | -0.40108033 | 595         | 600    | -0.06095531 | 2593973     | 1.00424554  | 2251843      | 0.88268437  |            | experimental | Microsource | 1503710 | Clopidogrel sulfate          |
| 2093 I14 | X | 475    | 480    | -0.17941872 | 473         | 480    | -0.26000957 | 2638555     | 1.03819675  | 2743280      | 1.02131483  |            | experimental | Microsource | 1505115 | Clorsolan                    |
| 2093 I15 | X | 314    | 320    | -0.47193937 | 551         | 560    | -0.13274537 | 2723493     | 1.10288087  | 2870490      | 1.11343485  |            | experimental | Microsource | 1503712 | Loratadine                   |
| 2093 I16 | X | 555    | 560    | -0.03406685 | 794         | 800    | 0.26373156  | 2809309     | 1.16823363  | 2947450      | 1.16916598  |            | experimental | Microsource | 1505116 | Estradiol                    |
| 2093 I17 | X | 512    | 520    | -0.11219348 | 591         | 600    | -0.06748168 | 2472800     | 0.91196683  | 3042059      | 1.23767775  |            | experimental | Microsource | 1503720 | Selamectin                   |
| 2093 I18 | X | 474    | 480    | -0.18123562 | 473         | 560    | -0.12948219 | 2811902     | 1.17020832  | 2860196      | 1.10598038  |            | experimental | Microsource | 1505124 | Clavulanate lithium          |
| 2093 I19 | X | 513    | 520    | -0.11037658 | 629         | 640    | -0.00848117 | 2729837     | 1.10771211  | 3375973      | 1.47948393  |            | experimental | Microsource | 1503722 | Atorvastatin calcium         |
| 2093 I20 | X | 554    | 560    | -0.03589374 | 743         | 750    | -0.18052037 | 2817304     | 1.17432219  | 2821704      | 1.03519745  |            | experimental | Microsource | 1505166 | Acetaminofen sodium          |
| 2093 I21 | X | 513    | 520    | -0.11037658 | 792         | 800    | 0.26046838  | 2615516     | 0.20261511  | 3516212      | 1.581038915 |            | experimental | Microsource | 1503721 | Enrofloxacin                 |
| 2093 I22 | X | 632    | 640    | 0.10583433  | 591         | 600    | -0.06748168 | 2606032     | 1.01342902  | 2631900      | 0.94065822  |            | experimental | Microsource | 1505120 | Acarbose                     |
| 2093 I23 | E | 473    | 720    | -0.18305252 | 714         | 1000   | 0.13320418  | 82523       | -0.90833706 | 87547        | -0.90185297 |            | empty        |             |         |                              |
| 2093 I24 | P | 82045  | 82760  | 148.024986  | 95728       | 96320  | 155.157317  | 2257637     | 0.74811049  | 2791145      | 1.05597661  |            | empty        |             |         |                              |
| 2093 J01 | N | 477    | 480    | -0.17578492 | 477         | 480    | -0.2534832  | 2121121     | 0.64414739  | 2587523      | 0.9085223   |            | empty        |             |         |                              |
| 2093 J02 | E | 356    | 360    | -0.39562963 | 315         | 320    | -0.51780116 | 80032       | -0.91023407 | 90223        | -0.89991513 |            | empty        |             |         |                              |
| 2093 J03 | X | 595    | 600    | 0.03860909  | 795         | 800    | 0.26536315  | 2631696     | 1.03297331  | 2718227      | 1.00172421  |            | experimental | Microsource | 1505426 | Ethoxzolamide                |
| 2093 J04 | X | 394    | 400    | -0.39744653 | 395         | 400    | -0.58145621 | 2120414     | 0.6496657   | 2648657      | 0.90490415  |            | experimental | Microsource | 1505371 | D-lactitol monohydrate       |
| 2093 J05 | X | 474    | 480    | -0.18123562 | 629         | 400    | -0.39216855 | 2659262     | 1.05396606  | 2597203      | 0.91553214  |            | experimental | Microsource | 1505429 | Flucytosine                  |
| 2093 J06 | X | 555    | 560    | -0.03406685 | 395         | 400    | -0.38727378 | 2636335     | 1.03650612  | 3175673      | 1.33443527  |            | experimental | Microsource | 1505972 | Bromperidol                  |
| 2093 J07 | X | 314    | 320    | -0.47193937 | 394         | 400    | -0.38890537 | 2869910     | 1.21438403  | 2966859      | 1.18322114  |            | experimental | Microsource | 1505432 | Fomepizole hydrochloride     |
| 2093 J08 | X | 435    | 440    | -0.25209466 | 555         | 560    | -0.126219   | 2417355     | 0.86974296  | 2439290      | 0.80117832  |            | experimental | Microsource | 1505973 | Cyproheptadine hydrochloride |
| 2093 J09 | X | 435    | 440    | -0.25209466 | 474         | 480    | -0.25837798 | 2844205     | 1.19480851  | 2815565      | 1.07366052  |            | experimental | Microsource | 1505433 | Glipizide                    |
| 2093 J10 | X | 553    | 560    | -0.03770064 | 474         | 480    | -0.25837798 | 2479844     | 0.91733115  | 2833585      | 1.08670983  |            | experimental | Microsource | 1505974 | Clofazimine                  |
| 2093 J11 | X | 394    | 400    | -0.39744653 | 594         | 600    | -0.06095531 | 2755285     | 1.11901381  | 2105780      | 1.06378564  |            | experimental | Microsource | 1505382 | Amiclonide                   |
| 2093 J12 | X | 474    | 480    | -0.18123562 | 474         | 480    | -0.25837798 | 2992039     | 1.30739870  | 3037892      | 1.23466019  |            | experimental | Microsource | 1505975 | Benzydamin hydrochloride     |
| 2093 J13 | X | 594    | 600    | 0.03679219  | 472         | 480    | -0.26164117 | 2784631     | 1.14944022  | 2782904      | 1.05000883  |            | experimental | Microsource | 1505437 | Levocarnitine                |
| 2093 J14 | X | 514    | 520    | -0.1085968  | 793         | 800    | 0.26209997  | 2631693     | 1.03297103  | 2954856      | 1.17452908  |            | experimental | Microsource | 1505976 | Doxazosin mesylate           |
| 2093 J15 | X | 473    | 480    | -0.18305252 | 1033        | 1040   | 0.65368213  | 2738131     | 1.11402837  | 3012160      | 1.21602618  |            | experimental | Microsource | 1505438 | Hydrocortisone valerate      |
| 2093 J16 | X | 353    | 360    | -0.40108033 | 471         | 480    | -0.26327276 | 2804462     | 1.16454242  | 2730163      | 1.01181606  |            | experimental | Microsource | 1505977 | Isoetharine mesylate         |
| 2093 J17 | X | 834    | 840    | 0.47284782  | 833         | 840    | 0.32736366  | 2799417     | 1.16070043  | 2943827      | 1.16654236  |            | experimental | Microsource | 1505440 | Lobenzazole                  |
| 2093 J18 | X | 709    | 710    | 0.00195754  | 709         | 720    | 0.12504621  | 2821748     | 1.1770649   | 2817304      | 1.14951742  |            | experimental | Microsource | 1505978 | Flefenidol                   |
| 2093 J19 | X | 874    | 880    | 0.54007306  | 1951        | 1960   | 0.25148388  | 7425261     | 1.1740202   | 2690317      | 0.98329611  |            | experimental | Microsource | 1505444 | Methylenblue                 |
| 2093 J20 | X | 593    | 600    | 0.03497529  | 587         | 600    | -0.07400805 | 2605192     | 1.01278932  | 2889184      | 1.12697224  |            | experimental | Microsource | 1505979 | Ethynodiol diacetate         |
| 2093 J21 | X | 591    | 600    | 0.0313415   | 833         | 840    | 0.32736366  | 2598416     | 1.00762909  | 2622084      | 0.93354989  |            | experimental | Microsource | 1505445 | Methylatropine nitrate       |
| 2093 J22 | X | 592    | 600    | 0.0331584   | 592         | 600    | -0.06585009 | 2496915     | 0.93033149  | 2596147      | 0.91476743  |            | experimental | Microsource | 1505981 | Ornidazole                   |
| 2093 J23 | E | 573    | 960    | -0.00136267 | 600         | 920    | -0.05279735 | 81730       | -0.90894097 | 85674        | -0.90320932 |            | empty        |             |         |                              |
| 2093 J24 | P | 130918 | 131400 | 236.822263  | 107521      | 108000 | 174.398686  | 2473860     | 0.91277407  | 2502467      | 0.84692824  |            | empty        |             |         |                              |
| 2093 K01 | N | 437    | 440    | -0.24846086 | 396         | 400    | -0.38564218 | 2116788     | 0.64084761  | 2185380      | 0.61730761  |            | empty        |             |         |                              |
| 2093 K02 | E | 235    | 240    | -0.61547434 | 276         | 280    | -0.58145326 | 82105       | -0.90865539 | 82524        | -0.90549041 |            | empty        |             |         |                              |
| 2093 K03 | X | 555    | 560    | -0.03406685 | 554         | 560    | -0.1278506  | 2592393     | 1.03030423  | 2419270      | 0.7866807   |            | experimental | Microsource | 1503801 | Naproxol                     |
| 2093 K04 | X | 355    | 360    | -0.39744653 | 433         | 440    | -0.32527327 | 2599803     | 1.00868535  | 2152883      | 0.59377467  |            | experimental | Microsource | 1505178 | Ropinorel                    |
| 2093 K05 | X | 435    | 440    | -0.25209466 | 634         | 640    | 0.00267679  | 2675138     | 1.06605636  | 2868313      | 1.11185836  |            | experimental | Microsource | 1503804 | Colforsin                    |
| 2093 K06 | X | 434    | 440    | -0.25391156 | 514         | 520    | -0.19311429 | 2558373     | 0.97713453  | 2366575      | 0.74852124  |            | experimental | Microsource | 1505187 | Quetiapine                   |
| 2093 K07 | X | 795    | 800    | 0.40198878  | 474         | 480    | -0.25837798 | 3372312     | 1.59698584  | 2986271      | 1.19727848  |            | experimental | Microsource | 1503807 | Isoorbide mononitrate        |
| 2093 K08 | X | 514    | 520    | -0.1085968  | 514         | 520    | -0.19311429 | 2619234     | 1.02348293  | 3052117      | 1.24496132  |            | experimental | Microsource | 1505189 | Rizatriptan benzoate         |
| 2093 K09 | X | 352    | 360    | -0.40289723 | 595         | 600    | -0.06095531 | 2595887     | 1.00646468  | 2801901      | 1.06378564  |            | experimental | Microsource | 1503816 | Amiclonide                   |
| 2093 K10 | X | 475    | 480    | -0.17941872 | 274         | 280    | -0.58469645 | 2336072     | 0.80784228  | 2482719      | 0.83262774  |            | experimental | Microsource | 1505200 | Benzpiperidol hydrochloride  |
| 2093 K11 | X | 315    | 320    | -0.47012247 | 515         | 520    | -0.1914827  | 2670657     | 1.06264387  | 2801827      | 1.06371205  |            | experimental | Microsource | 1503818 | Bupivacaine hydrochloride    |
| 2093 K12 | X | 474    | 480    | -0.18123562 | 433         | 440    | -0.32527327 | 2682114     | 1.07136889  | 2716892      | 1.00220577  |            | experimental | Microsource | 1505201 | Famciclovir                  |
| 2093 K13 | X | 634    | 640    | 0.10946813  | 755         | 760    | 0.20009946  | 2502066     | 0.93425421  | 2922688      | 1.1512344   |            | experimental | Microsource | 1503903 | Albendazole                  |
| 2093 K14 | X | 432    | 440    | -0.25754535 | 352         | 360    | -0.45743225 | 2510427     | 0.94062149  | 2723238      | 1.00680127  |            | experimental | Microsource | 1505203 | Ezetimibe                    |
| 2093 K15 | X | 1155   | 1160   | 1.05607221  | 673         | 680    | 0.06630889  | 2581007     | 0.99437135  | 2278217      | 0.68453617  |            | experimental | Microsource | 1503908 | Pacitaxel                    |
| 2093 K16 | X | 433    | 440    | -0.25728453 | 313         | 320    | -0.52106435 | 2738085     | 1.11399334  | 2738948      | 1.01817778  |            | experimental | Microsource | 1505205 | Olimetasan medoxomil         |
| 2093 K17 | X | 632    | 640    | 0.10583433  | 753         | 760    | 0.19883628  | 1318170     | 1.10746714  | 2914383      | 1.14521883  |            | experimental | Microsource | 1503941 | Butacaine                    |
| 2        |   |        |        |             |             |        |             |             |             |              |             |            |              |             |         |                              |

|          |   |        |        |            |             |       |            |             |            |             |            |             |              |             |         |                                     |
|----------|---|--------|--------|------------|-------------|-------|------------|-------------|------------|-------------|------------|-------------|--------------|-------------|---------|-------------------------------------|
| 2093 L13 | X |        | 434    | 440        | -0.25391156 | 553   | 560        | -0.12948219 | 2240416    | 0.73499592  | 2666937    | 0.96603051  | experimental | Microsource | 1505463 | Taurine                             |
| 2093 L14 | X |        | 514    | 520        | -0.1085968  | 594   | 600        | -0.0625869  | 2921389    | 1.25358761  | 3075022    | 1.26154814  | experimental | Microsource | 1505993 | Mesalamine                          |
| 2093 L15 | X |        | 512    | 520        | -0.11219348 | 634   | 640        | 0.00267679  | 2486629    | 0.92249824  | 2859481    | 1.1054626   | experimental | Microsource | 1505464 | Thiamine                            |
| 2093 L16 | X |        | 514    | 560        | -0.39926343 | 833   | 840        | 0.19474588  | 1897621    | 0.47394204  | 2184995    | 0.62423038  | experimental | Microsource | 2300691 | Clomipramine hydrochloride          |
| 2093 L17 | X |        | 752    | 760        | 0.3238614   | 833   | 840        | 0.32763666  | 1722223    | 0.34036854  | 1636913    | 0.22013136  | experimental | Microsource | 1505465 | Triclosan                           |
| 2093 L18 | X |        | 593    | 600        | 0.03497529  | 552   | 560        | -0.13111378 | 1920018    | 0.49099837  | 2302469    | 0.70209843  | experimental | Microsource | 2300094 | Astemizole                          |
| 2093 L19 | X |        | 551    | 560        | -0.04133444 | 512   | 520        | -0.19637747 | 2567590    | 0.9841537   | 2634770    | 0.94273655  | experimental | Microsource | 1505467 | Zinc undecylenate                   |
| 2093 L20 | X |        | 594    | 400        | -0.32658749 | 472   | 480        | -0.26164117 | 2516197    | 0.94501561  | 3236193    | 1.37826126  | experimental | Microsource | 2300154 | Acecaidine hydrochloride            |
| 2093 L21 | X |        | 311    | 520        | -0.11401038 | 831   | 840        | 0.32410048  | 2732608    | 1.10982236  | 2567041    | 0.89369011  | experimental | Microsource | 1505468 | Undecylenic acid                    |
| 2093 L22 | X |        | 112    | 1120       | 0.97794558  | 831   | 840        | 0.32410048  | 2655922    | 1.0514225   | 3378275    | 1.48115094  | experimental | Microsource | 2300173 | Bupropione hydrochloride            |
| 2093 L23 | E |        | 501    | 800        | -0.13217936 | 642   | 920        | 0.01572953  | 83186      | -0.90783216 | 86824      | -0.90237654 | empty        |             |         |                                     |
| 2093 L24 | P | 99846  | 100440 | 180.367595 | 64          | 93169 | 93640      | 150.982073  | 2526757    | 0.95305752  | 2764192    | 0.74864218  | empty        |             |         |                                     |
| 2093 M01 | N |        | 477    | 480        | -0.17578492 | 636   | 640        | 0.00593998  | 2276125    | 0.76218993  | 2094274    | 0.55133255  | empty        |             |         |                                     |
| 2093 M02 | E |        | 356    | 360        | -0.39562963 | 356   | 360        | -0.45090588 | 80970      | -0.90951974 | 82070      | -0.90581918 | empty        |             |         |                                     |
| 2093 M03 | X |        | 475    | 480        | -0.17941872 | 315   | 320        | -0.51780116 | 2738782    | 1.11452414  | 1972852    | 0.46340395  | experimental | Microsource | 1503923 | Iopanic acid                        |
| 2093 M04 | X |        | 434    | 440        | -0.25391156 | 474   | 480        | -0.25837798 | 2819624    | 1.17608897  | 2174634    | 0.60952581  | experimental | Microsource | 1505210 | Sibutramine hydrochloride           |
| 2093 M05 | X |        | 635    | 640        | 0.11182503  | 474   | 480        | -0.25837798 | 2465922    | 0.90672892  | 2434064    | 0.79739388  | experimental | Microsource | 1503925 | Ketorolac tromethamine              |
| 2093 M06 | X |        | 433    | 440        | -0.25572845 | 433   | 440        | -0.32527327 | 2792741    | 1.15561635  | 2435348    | 0.7983237   | experimental | Microsource | 1505212 | Perindopril erbumine                |
| 2093 M07 | X |        | 1115   | 1120       | 0.98339627  | 1114  | 1120       | 0.78584111  | 2616219    | 1.02118688  | 2764192    | 1.0364584   | experimental | Microsource | 1503926 | Lansoprazole                        |
| 2093 M08 | X |        | 513    | 520        | -0.11037658 | 433   | 440        | -0.32527327 | 2807805    | 1.16708827  | 2409970    | 0.77994604  | experimental | Microsource | 1505213 | Rosuvastatin calcium                |
| 2093 M09 | X |        | 352    | 360        | -0.40289723 | 514   | 520        | -0.19311429 | 2656102    | 1.05159558  | 2385179    | 0.76199346  | experimental | Microsource | 1503929 | Mexiletine hydrochloride            |
| 2093 M10 | X |        | 594    | 600        | 0.03679219  | 595   | 600        | -0.06095531 | 2708758    | 1.0916595   | 2261688    | 0.67256658  | experimental | Microsource | 1505214 | Ramipril                            |
| 2093 M11 | X |        | 746    | 760        | 0.31296075  | 422   | 440        | -0.34322078 | 2501381    | 0.93373255  | 2049046    | 0.51858038  | experimental | Microsource | 1505231 | Morantil citrate                    |
| 2093 M12 | X |        | 513    | 520        | -0.11037658 | 394   | 400        | -0.38890537 | 2882081    | 1.2236528   | 1323458    | 0.57898377  | experimental | Microsource | 1505222 | Deracoxib                           |
| 2093 M13 | X |        | 514    | 520        | -0.1085968  | 435   | 440        | -0.32201008 | 2545041    | 0.96698161  | 2284500    | 0.68904985  | experimental | Microsource | 1503932 | Oxyphencyclimine hydrochloride      |
| 2093 M14 | X |        | 633    | 640        | 0.107675123 | 394   | 400        | -0.38890537 | 28089037   | 1.16140257  | 2284500    | 0.68904985  | experimental | Microsource | 2300230 | Perphenazine                        |
| 2093 M15 | X |        | 794    | 800        | 0.40011968  | 434   | 440        | -0.32364657 | 1744538    | 0.35736242  | 1760035    | 0.30929102  | experimental | Microsource | 1503935 | Perphenazine                        |
| 2093 M16 | X |        | 514    | 520        | -0.11219348 | 514   | 520        | -0.19311429 | 2780517    | 1.14630722  | 2642651    | 0.94844363  | experimental | Microsource | 1505244 | Citicoline                          |
| 2093 M17 | X |        | 1114   | 1120       | 0.98157938  | 471   | 480        | -0.26327276 | 2240098    | 0.73475375  | 2620200    | 0.93218558  | experimental | Microsource | 1503935 | Propafenone hydrochloride           |
| 2093 M18 | X |        | 431    | 440        | -0.25936225 | 1034  | 1040       | 0.65531372  | 2415361    | 0.86822444  | 2491934    | 0.83930085  | experimental | Microsource | 1505248 | Canrenone                           |
| 2093 M19 | X |        | 714    | 720        | 0.25482     | 632   | 640        | -0.00058639 | 2616183    | 1.02115946  | 2611177    | 0.92565151  | experimental | Microsource | 1503968 | Tacrolimus                          |
| 2093 M20 | X |        | 554    | 560        | -0.03588374 | 472   | 480        | -0.26164117 | 2765042    | 1.13452231  | 2740963    | 1.01963696  | experimental | Microsource | 1505249 | Acpramycin                          |
| 2093 M21 | X |        | 433    | 440        | -0.25572845 | 1193  | 1200       | 0.9147369   | 2345155    | 0.8147594   | 2890611    | 1.12800561  | experimental | Microsource | 1503975 | Fluconazole                         |
| 2093 M22 | X |        | 720    | 720        | 0.2475524   | 670   | 720        | 0.06141411  | 2324444    | 0.64885602  | 7998974    | 0.77848417  | experimental | Microsource | 1505261 | Telmisartan                         |
| 2093 M23 | E |        | 560    | 920        | -0.02498235 | 562   | 840        | -0.11479786 | 91841      | -0.90124099 | 85790      | -0.90312532 | empty        |             |         |                                     |
| 2093 M24 | P | 121207 | 121800 | 219.178362 | 93009       | 93560 | 150.721018 | 2246142     | 0.73935653 | 2857243     | 1.10384194 | empty       |              |             |         |                                     |
| 2093 N01 | N |        | 356    | 360        | -0.39562963 | 596   | 600        | -0.05932372 | 2012318    | 0.56128899  | 2203915    | 0.63072986  | empty        |             |         |                                     |
| 2093 N02 | E |        | 276    | 280        | -0.54098151 | 195   | 200        | -0.71359224 | 77896      | -0.91186073 | 80603      | -0.90688152 | empty        |             |         |                                     |
| 2093 N03 | X |        | 555    | 560        | -0.03406685 | 435   | 440        | -0.32201008 | 2421034    | 0.87254468  | 2531792    | 0.8681643   | experimental | Microsource | 1505470 | Clindamycin palmitate hydrochloride |
| 2093 N04 | X |        | 474    | 480        | -0.18123562 | 595   | 600        | -0.06095531 | 2151989    | 0.66765476  | 2579273    | 0.9025248   | experimental | Microsource | 2300205 | Levodopa                            |
| 2093 N05 | X |        | 440    | 440        | -0.25391156 | 394   | 400        | -0.38890537 | 2643821    | 1.0420705   | 10992613   | 0.62423038  | experimental | Microsource | 1505474 | Felicitinid sodium                  |
| 2093 N06 | X |        | 435    | 440        | -0.25209466 | 474   | 480        | -0.25674639 | 2134201    | 0.65541084  | 2754695    | 1.02598108  | experimental | Microsource | 2300104 | Taurine hydrochloride               |
| 2093 N07 | X |        | 313    | 320        | -0.47375626 | 432   | 440        | -0.32690486 | 2602424    | 1.01068136  | 2664760    | 0.96445402  | experimental | Microsource | 1505480 | Ifosfamide                          |
| 2093 N08 | X |        | 315    | 320        | -0.47012247 | 474   | 480        | -0.25837798 | 2152138    | 0.66776823  | 2422942    | 0.78933981  | experimental | Microsource | 2300161 | Amoxapine                           |
| 2093 N09 | X |        | 275    | 280        | -0.54279841 | 554   | 560        | -0.1278506  | 2731265    | 1.1087996   | 2699916    | 0.98991248  | experimental | Microsource | 1505482 | Nelmiclin sulfate                   |
| 2093 N10 | X |        | 387    | 400        | -0.33930578 | 501   | 520        | -0.21432499 | 2104774    | 0.63169841  | 2274081    | 0.68154106  | experimental | Microsource | 2300165 | Amiodarone hydrochloride            |
| 2093 N11 | X |        | 3274   | 3280       | 4.90607998  | 4914  | 4920       | 0.98589195  | 1948791    | 0.51291031  | 1926048    | 0.42951051  | experimental | Microsource | 1505483 | Doxorubicin                         |
| 2093 N12 | X |        | 706    | 720        | 0.24028482  | 670   | 720        | 0.34322078  | 2127304    | 0.64885602  | 7998974    | 0.77848417  | experimental | Microsource | 2300206 | Diazoxide                           |
| 2093 N13 | X |        | 593    | 600        | 0.03497529  | 315   | 320        | -0.51780116 | 2692760    | 1.08290326  | 2814602    | 0.7296329   | experimental | Microsource | 1505492 | Methysergide maleate                |
| 2093 N14 | X |        | 474    | 480        | -0.18123562 | 434   | 440        | -0.32364167 | 2486673    | 0.741284    | 2191190    | 0.62151496  | experimental | Microsource | 2300214 | Diltiazem hydrochloride             |
| 2093 N15 | X |        | 274    | 280        | -0.5446153  | 635   | 640        | 0.00430838  | 2153778    | 0.66901717  | 2548761    | 0.88045252  | experimental | Microsource | 1505498 | Acepromazine maleate                |
| 2093 N16 | X |        | 435    | 440        | -0.25209466 | 593   | 600        | -0.0642185  | 2075058    | 0.60906833  | 2848435    | 1.09746357  | experimental | Microsource | 2300219 | Ederophonium chloride               |
| 2093 N17 | X |        | 472    | 480        | -0.18486941 | 594   | 600        | -0.0625869  | 2582989    | 0.99588073  | 2626303    | 0.93660511  | experimental | Microsource | 1505514 | Biperiden                           |
| 2093 N18 | X |        | 594    | 600        | 0.03679219  | 390   | 400        | -0.39543174 | 2277203    | 0.76301088  | 2821198    | 1.0777397   | experimental | Microsource | 2300176 | Phenoxybenzamine hydrochloride      |
| 2093 N19 | X |        | 632    | 640        | 0.10583433  | 834   | 840        | 0.32899526  | 2700206    | 1.08514677  | 2871319    | 1.11403518  | experimental | Microsource | 1505530 | Dexchlorpheniramine maleate         |
| 2093 N20 | X |        | 593    | 600        | 0.03497529  | 593   | 600        | -0.0642185  | 2141141    | 0.65939352  | 2958126    | 1.17689708  | experimental | Microsource | 2300242 | Loxapine succinate                  |
| 2093 N21 | X |        | 553    | 560        | -0.03770064 | 511   | 520        | -0.19809007 | 2360047    | 0.82610033  | 2436417    | 0.79909782  | experimental | Microsource | 1505532 | Diloxanate furoate                  |
| 2093 N22 | X |        | 832    | 840        | 0.46921402  | 592   | 600        | -0.06585009 | 2055490    | 0.59416642  | 2201714    | 0.62913599  | experimental | Microsource | 2300212 | Domperidone                         |
| 2093 N23 | E |        | 613    | 920        | 0.07131326  | 715   | 1000       | 0.13483577  | 78270      | -0.91157592 | 80996      | -0.90659693 | empty        |             |         |                                     |
| 2093 N24 | P | 102702 | 103440 | 185.556657 | 95206       | 95800 | 154.305626 | 2184157     | 0.69215215 | 2292676     | 0.69500676 | empty       |              |             |         |                                     |
| 2093 O01 | N |        | 557    | 560        | -0.03043305 | 514   | 520        | -0.19311429 | 2037456    | 0.58043271  | 1908245    | 0.41661834  | empty        |             |         |                                     |
| 2093 O02 | E |        | 196    | 200        | -0.6863338  | 275   | 280        | -0.58036485 | 75883      | -0.91393372 | 79752      | -0.90749778 | empty        |             |         |                                     |
| 2093 O03 | X |        | 395    | 400        | -0.32477059 | 716   | 720        | 0.13646736  | 2486174    | 0.92215173  | 2067764    | 0.53213515  | experimental | Microsource | 1503977 | Lovastatin                          |
| 2093 O04 | X |        | 554    | 560        | -0.03588374 | 311   | 320        | -0.52437253 | 2103677    | 0.63086299  | 1621266    | 0.20880047  | experimental | Microsource | 1505262 | Sertraline hydrochloride            |
| 2093 O05 | X |        | 434    | 440        | -0.25391156 | 394   | 400        | -0.38890537 | 2358459    | 0.82489099  | 2386837    | 0.76319411  | experimental | Microsource | 1503978 | Hydroxychloroquine sulfate          |
| 2093 O06 | X |        | 514    | 520        | -0.1085968  | 474   | 480        | -0.25837798 | 2463703    | 0.90503905  | 2228305    | 0.64839205  | experimental | Microsource | 1505263 | Alfuzosin                           |
| 2093 O07 | X |        | 595    | 600        | 0.03860909  | 554   | 560        | -0.1278506  | 2668049    | 1.06065776  | 2572816    | 0.89787212  | experimental | Microsource | 1503985 | Brompheniramine maleate             |
| 2093 O08 | X |        | 474    | 480        | -0.18123562 | 554   | 560        | -0.1278506  | 2448791    | 0.89386289  | 2554432    | 0.88455922  | experimental | Microsource | 1505267 | Oxapropin                           |
| 2093 O09 | X |        | 515    | 520        | -0.10674278 | 512   | 520        | -0.19637747 | 1790964    | 0.39271792  | 1996916    | 0.48083007  | experimental | Microsource | 1504008 | Sirolimus                           |
| 2093 O10 | X |        | 395    | 400        | -0.32477059 | 634   | 640        | 0.00267679  | 2194707    | 0.70018645  | 1982329    | 0.47070128  | experimental | Microsource | 1505270 | Proparanolol hydrochloride (+/-)    |
| 2093 O11 | X |        | 360    | 360        | 0.41198172  | 501   | 520        | -0.21432499 | 1444378    | 0.66185864  | 1917635    | 0.42349187  | experimental | Microsource | 1504985 | Paroxetine hydrochloride            |





|          |   |        |        |             |        |        |             |          |             |         |             |  |             |         |  |  |  |  |                                |
|----------|---|--------|--------|-------------|--------|--------|-------------|----------|-------------|---------|-------------|--|-------------|---------|--|--|--|--|--------------------------------|
| 2094 D01 | N | 436    | 440    | -0.58814244 | 237    | 240    | -1.6154876  | 1960093  | -1.29036079 | 2309609 | -0.82892723 |  |             |         |  |  |  |  | empty                          |
| 2094 D02 | E | 317    | 320    | -1.03696938 | 277    | 280    | -1.36595531 | 84195    | -7.73235677 | 85845   | -9.71106041 |  |             |         |  |  |  |  | empty                          |
| 2094 D03 | E | 435    | 440    | -0.5919141  | 356    | 360    | -0.87312905 | 2564495  | 0.78520795  | 2702889 | 0.74190733  |  |             |         |  |  |  |  | empty                          |
| 2094 D04 | E | 394    | 400    | -0.74655195 | 392    | 400    | -0.64855    | 24455675 | 0.3771698   | 276252  | 0.97210441  |  |             |         |  |  |  |  | empty                          |
| 2094 D05 | E | 395    | 400    | -0.7427803  | 434    | 440    | -0.3865411  | 7527472  | 0.65806777  | 2602371 | 0.34281598  |  |             |         |  |  |  |  | empty                          |
| 2094 D06 | E | 315    | 320    | -1.04451269 | 675    | 680    | -1.1168909  | 2709577  | 1.28343209  | 2657864 | 0.56206898  |  |             |         |  |  |  |  | empty                          |
| 2094 D07 | E | 432    | 440    | -0.60322906 | 275    | 280    | -1.37843193 | 2745199  | 1.40576112  | 2845264 | 1.31057996  |  |             |         |  |  |  |  | empty                          |
| 2094 D08 | E | 475    | 480    | -0.4410479  | 275    | 280    | -1.37843193 | 2665954  | 1.13362693  | 2866681 | 1.3961235   |  |             |         |  |  |  |  | empty                          |
| 2094 D09 | E | 394    | 400    | -0.74655195 | 315    | 320    | -1.12889964 | 2789684  | 1.55852646  | 2638569 | 0.48500111  |  |             |         |  |  |  |  | empty                          |
| 2094 D10 | E | 435    | 440    | -0.5919141  | 356    | 360    | -0.87312905 | 2785065  | 1.54266441  | 3126472 | 2.43377779  |  |             |         |  |  |  |  | empty                          |
| 2094 D11 | E | 555    | 560    | -0.1393155  | 275    | 280    | -1.37843193 | 2815059  | 1.6456664   | 2950841 | 1.73227442  |  |             |         |  |  |  |  | empty                          |
| 2094 D12 | E | 298    | 320    | -1.10863083 | 275    | 280    | -1.37843193 | 2700462  | 1.25213039  | 2540272 | 0.11778738  |  |             |         |  |  |  |  | empty                          |
| 2094 D13 | E | 1352   | 1360   | 2.8666935   | 395    | 400    | -0.62983508 | 2501117  | 0.56756242  | 2792528 | 1.09994242  |  |             |         |  |  |  |  | empty                          |
| 2094 D14 | E | 513    | 520    | -0.29772501 | 395    | 400    | -0.62983508 | 2662340  | 1.12121615  | 2806662 | 1.15639628  |  |             |         |  |  |  |  | empty                          |
| 2094 D15 | E | 315    | 320    | -1.04451269 | 395    | 440    | -0.38030279 | 2889406  | 1.90098043  | 3062005 | 2.17628442  |  |             |         |  |  |  |  | empty                          |
| 2094 D16 | E | 396    | 400    | -0.73900864 | 395    | 400    | -0.62983508 | 2856274  | 1.78720227  | 2723392 | 0.82380018  |  |             |         |  |  |  |  | empty                          |
| 2094 D17 | E | 355    | 360    | -0.8936465  | 514    | 520    | 0.11252346  | 2488473  | 0.52414183  | 2461079 | -0.22392745 |  |             |         |  |  |  |  | empty                          |
| 2094 D18 | E | 474    | 480    | -0.44481956 | 594    | 600    | 0.61158803  | 2386071  | 0.1724845   | 2807329 | 1.15906041  |  |             |         |  |  |  |  | empty                          |
| 2094 D19 | E | 634    | 640    | 0.15864524  | 434    | 440    | -0.3865411  | 2574318  | 0.81894098  | 2628018 | 0.442285842 |  |             |         |  |  |  |  | empty                          |
| 2094 D20 | E | 473    | 480    | -0.44859121 | 514    | 520    | 0.11252346  | 2927409  | 2.03148602  | 2803784 | 1.14490101  |  |             |         |  |  |  |  | empty                          |
| 2094 D21 | E | 794    | 800    | 0.76211003  | 474    | 480    | -0.13700882 | 2283062  | -0.18125731 | 2658101 | 0.56301556  |  |             |         |  |  |  |  | empty                          |
| 2094 D22 | E | 511    | 520    | -0.30526832 | 712    | 720    | 1.34770826  | 2354358  | 0.06357932  | 2570490 | 0.21380873  |  |             |         |  |  |  |  | empty                          |
| 2094 D23 | E | 789    | 1160   | 0.74325175  | 661    | 1040   | 1.0295546   | 88031    | -7.71918362 | 88474   | -9.70055969 |  |             |         |  |  |  |  | empty                          |
| 2094 D24 | P | 125562 | 126080 | 471.343956  | 127777 | 128320 | 794.018197  | 2178999  | -0.53861865 | 2390209 | -0.50699561 |  |             |         |  |  |  |  | empty                          |
| 2094 E01 | N | 477    | 480    | -0.43350459 | 398    | 400    | -0.61112016 | 2114359  | -0.760598   | 2235787 | -1.12378623 |  |             |         |  |  |  |  | empty                          |
| 2094 E02 | X | 112    | 120    | -1.79884369 | 157    | 157    | 2.8455116   | 84031    | -7.73291996 | 85281   | -9.71331314 |  |             |         |  |  |  |  | empty                          |
| 2094 E03 | X | 475    | 480    | -0.4410479  | 276    | 280    | -1.37219362 | 2616331  | 0.96321466  | 2704861 | 0.74893387  |  |             |         |  |  |  |  | experimental                   |
| 2094 E04 | E | 835    | 840    | 0.91674788  | 434    | 440    | -0.37406449 | 2579862  | 0.83797956  | 2593952 | 0.30679239  |  | Microsource | 1506082 |  |  |  |  | Pentetic acid                  |
| 2094 E05 | X | 394    | 400    | -0.74655195 | 435    | 440    | -0.38030279 | 2627065  | 1.00007874  | 2879854 | 1.44873895  |  | Microsource | 1506043 |  |  |  |  | Sotalol hydrochloride          |
| 2094 E06 | E | 392    | 400    | -0.75409526 | 555    | 560    | 0.36829405  | 2581437  | 0.84338825  | 2659405 | 0.56822403  |  |             |         |  |  |  |  | empty                          |
| 2094 E07 | X | 1355   | 1360   | 2.87800846  | 435    | 440    | -0.38030279 | 2564265  | 0.78441811  | 2814240 | 1.18666424  |  | Microsource | 1506029 |  |  |  |  | Pepstatin a                    |
| 2094 E08 | E | 432    | 440    | -0.60322906 | 594    | 600    | 0.61158803  | 2450623  | 0.39416166  | 2669736 | 0.60948799  |  |             |         |  |  |  |  | empty                          |
| 2094 E09 | X | 595    | 600    | 0.01155069  | 675    | 680    | -1.1168909  | 2602352  | 0.91521216  | 2657609 | 0.56105046  |  | Microsource | 1505420 |  |  |  |  | Diexpanthenol                  |
| 2094 E10 | X | 474    | 480    | -0.44481956 | 674    | 680    | -0.44481956 | 2407705  | 0.46454399  | 2471116 | 0.29261302  |  |             |         |  |  |  |  | empty                          |
| 2094 E11 | X | 554    | 560    | -0.14308716 | 355    | 360    | -0.87936736 | 2736390  | 1.37551025  | 2832471 | 1.2594823   |  | Microsource | 1601020 |  |  |  |  | Diethyltoluamide               |
| 2094 E12 | E | 433    | 440    | -0.59945741 | 475    | 480    | -0.13077051 | 2825892  | 1.68286786  | 2523727 | 0.02630048  |  |             |         |  |  |  |  | empty                          |
| 2094 E13 | X | 872    | 880    | 1.05629912  | 675    | 680    | -1.1168909  | 2508530  | 0.5930193   | 2400392 | -0.46632279 |  | Microsource | 1505202 |  |  |  |  | Amlodipine besylate            |
| 2094 E14 | E | 394    | 400    | -0.74655195 | 354    | 360    | -0.88560567 | 2376804  | 1.04066802  | 2462233 | -0.21931816 |  |             |         |  |  |  |  | empty                          |
| 2094 E15 | X | 435    | 440    | -0.5919141  | 475    | 480    | -0.13077051 | 2286211  | -0.17044337 | 2656693 | 0.55739179  |  | Microsource | 1503692 |  |  |  |  | Bleomycin (bleomycin b2 shown) |
| 2094 E16 | E | 395    | 400    | -0.7427803  | 434    | 440    | -0.3865411  | 2382118  | 0.15899056  | 2531189 | 0.05610512  |  |             |         |  |  |  |  | empty                          |
| 2094 E17 | X | 435    | 440    | -0.5919141  | 674    | 680    | -1.065226   | 2287371  | 1.17694882  | 2440725 | -0.4406057  |  | Microsource | 1505022 |  |  |  |  | Propofol                       |
| 2094 E18 | E | 595    | 600    | 0.01155069  | 514    | 520    | 0.11252346  | 2652665  | 0.95268835  | 2434133 | -0.33155487 |  |             |         |  |  |  |  | empty                          |
| 2094 E19 | X | 473    | 480    | -0.44859121 | 475    | 480    | -0.13077051 | 2474488  | 0.47611613  | 2695003 | 0.71040916  |  | Microsource | 1503216 |  |  |  |  | Filipin                        |
| 2094 E20 | E | 593    | 600    | 0.00400738  | 514    | 520    | 0.11252346  | 2646383  | 1.06641843  | 2449586 | -0.26983267 |  |             |         |  |  |  |  | empty                          |
| 2094 E21 | X | 592    | 600    | 0.00023573  | 433    | 440    | -0.39277941 | 2197544  | -0.47493352 | 2661892 | 0.57815757  |  | Microsource | 1900006 |  |  |  |  | Pentobarbital                  |
| 2094 E22 | E | 593    | 600    | 0.00400738  | 592    | 600    | 0.59911142  | 2422991  | 0.29927098  | 2284444 | -0.92944099 |  |             |         |  |  |  |  | empty                          |
| 2094 E23 | E | 594    | 840    | 0.00777904  | 687    | 920    | 1.19175059  | 85202    | -7.72889865 | 86803   | -9.70723398 |  |             |         |  |  |  |  | empty                          |
| 2094 E24 | P | 815206 | 822000 | 305.247814  | 77081  | 77760  | 477.769981  | 2844786  | -0.86215424 | 238706  | -0.5050105  |  |             |         |  |  |  |  | empty                          |
| 2094 F01 | N | 476    | 480    | -0.43727625 | 317    | 320    | -1.1642033  | 2328603  | 0.21164209  | 2515657 | -0.00593262 |  |             |         |  |  |  |  | empty                          |
| 2094 F02 | E | 317    | 320    | -1.03696938 | 197    | 200    | -1.86501988 | 87345    | -7.7215394  | 86568   | -9.70817261 |  |             |         |  |  |  |  | empty                          |
| 2094 F03 | E | 355    | 360    | -0.8936465  | 276    | 280    | -1.37219362 | 2584667  | 0.85448035  | 2649345 | 0.52804249  |  |             |         |  |  |  |  | empty                          |
| 2094 F04 | E | 434    | 440    | -0.59568575 | 395    | 400    | -0.62983508 | 2880220  | 1.86943491  | 2959173 | 1.765554    |  |             |         |  |  |  |  | empty                          |
| 2094 F05 | E | 434    | 440    | -0.59568575 | 396    | 400    | -0.62359677 | 2809674  | 1.62717384  | 2719729 | 0.80916947  |  |             |         |  |  |  |  | empty                          |
| 2094 F06 | E | 834    | 840    | 0.91297623  | 275    | 280    | -1.37843193 | 2808071  | 1.621669    | 2957884 | 1.76040549  |  |             |         |  |  |  |  | empty                          |
| 2094 F07 | E | 351    | 360    | -0.90873312 | 435    | 440    | -0.38030279 | 2818085  | 1.65605795  | 2709695 | 0.76099178  |  |             |         |  |  |  |  | empty                          |
| 2094 F08 | E | 355    | 360    | -0.8936465  | 555    | 560    | 0.36829405  | 2840012  | 1.73135716  | 2851181 | 1.33421357  |  |             |         |  |  |  |  | empty                          |
| 2094 F09 | E | 434    | 440    | -0.59568575 | 314    | 320    | -1.13513795 | 2501490  | 0.56884333  | 2597571 | 0.32124736  |  |             |         |  |  |  |  | empty                          |
| 2094 F10 | E | 434    | 440    | -0.59568575 | 395    | 400    | -0.62983508 | 3224011  | 0.05004294  | 2891916 | 1.49691685  |  |             |         |  |  |  |  | empty                          |
| 2094 F11 | E | 554    | 560    | -0.14308716 | 475    | 480    | -0.13077051 | 2757750  | 1.44886234  | 2734630 | 0.86868688  |  |             |         |  |  |  |  | empty                          |
| 2094 F12 | E | 554    | 560    | -0.14308716 | 355    | 360    | -0.87936736 | 3210789  | 3.00463745  | 2928627 | 1.64354751  |  |             |         |  |  |  |  | empty                          |
| 2094 F13 | E | 473    | 480    | -0.44859121 | 513    | 520    | 0.10628516  | 2722465  | 1.3276906   | 2454673 | -0.24951423 |  |             |         |  |  |  |  | empty                          |
| 2094 F14 | E | 314    | 320    | -1.04828435 | 434    | 440    | -0.3865411  | 2863855  | 1.81323608  | 2718666 | 0.80492365  |  |             |         |  |  |  |  | empty                          |
| 2094 F15 | E | 474    | 480    | -0.4410479  | 595    | 600    | 0.61782634  | 2468845  | 0.45673758  | 2490725 | -0.10551573 |  |             |         |  |  |  |  | empty                          |
| 2094 F16 | E | 435    | 440    | -0.5919141  | 394    | 400    | -0.6307338  | 3096559  | 2.61236175  | 2613925 | 0.38856832  |  |             |         |  |  |  |  | empty                          |
| 2094 F17 | E | 435    | 440    | -0.5919141  | 635    | 640    | 0.86735862  | 2439918  | 0.35739976  | 2467196 | -0.199495   |  |             |         |  |  |  |  | empty                          |
| 2094 F18 | E | 354    | 360    | -0.89741815 | 314    | 320    | -1.13513795 | 2458645  | 0.4217099   | 2413674 | -0.41327197 |  |             |         |  |  |  |  | empty                          |
| 2094 F19 | E | 474    | 480    | -0.44481956 | 354    | 360    | -0.88560567 | 2403191  | 0.23127607  | 2489988 | -0.10845945 |  |             |         |  |  |  |  | empty                          |
| 2094 F20 | E | 713    | 720    | 0.45660598  | 674    | 680    | 1.11065226  | 2640310  | 1.04556322  | 2785580 | 1.07219079  |  |             |         |  |  |  |  | empty                          |
| 2094 F21 | E | 673    | 680    | 0.30573978  | 673    | 680    | 1.10441429  | 2315537  | -0.06973535 | 2664834 | 0.58990848  |  |             |         |  |  |  |  | empty                          |
| 2094 F22 | E | 600    | 600    | 0.00023573  | 582    | 582    | 0.34957913  | 2430444  | 0.32486522  | 2436380 | -0.32425792 |  |             |         |  |  |  |  | empty                          |
| 2094 F23 | E | 605    | 920    | 0.04928724  | 607    | 920    | 0.69286802  | 87280    | -7.72176262 | 87279   | -9.70532275 |  |             |         |  |  |  |  | empty                          |
| 2094 F24 | P | 105912 |        |             |        |        |             |          |             |         |             |  |             |         |  |  |  |  |                                |



|          |   |       |       |             |       |        |             |         |             |         |             |              |             |         |                                 |
|----------|---|-------|-------|-------------|-------|--------|-------------|---------|-------------|---------|-------------|--------------|-------------|---------|---------------------------------|
| 2094 K13 | X | 1074  | 1080  | 1.81817342  | 315   | 320    | -1.12889964 | 2832321 | 1.7049456   | 2858564 | 1.36370267  | experimental | Microsource | 1501196 | Flumethasone                    |
| 2094 K14 | E | 433   | 440   | -0.59945741 | 635   | 640    | 0.86735862  | 2278009 | -0.19860975 | 2534434 | 0.06906626  | empty        |             |         |                                 |
| 2094 K15 | X | 394   | 400   | -0.7465195  | 314   | 320    | -1.13513795 | 2369416 | 0.11528979  | 2399700 | -0.46908677 | experimental | Microsource | 1500261 | Disopyramide phosphate          |
| 2094 K16 | E | 594   | 600   | 0.00777904  | 554   | 560    | 0.36205575  | 2787144 | 1.54980388  | 2602098 | 0.33932905  | empty        |             |         |                                 |
| 2094 K17 | X | 433   | 440   | -0.59945741 | 393   | 400    | -0.64231169 | 2942043 | 0.08174040  | 2632524 | 2.2223488   | experimental | Microsource | 1505434 | Halothane                       |
| 2094 K18 | E | 435   | 440   | -0.5919141  | 674   | 680    | -1.1106526  | 2452824 | 0.40172008  | 2613011 | 0.38291763  | empty        |             |         |                                 |
| 2094 K19 | X | 433   | 440   | -0.59945741 | 713   | 720    | 1.35394657  | 2636795 | 1.03349241  | 2990343 | 1.89005287  | experimental | Microsource | 1300030 | Omega-3-acid esters (epa shown) |
| 2094 K20 | E | 473   | 480   | -0.44859121 | 553   | 560    | 0.35581744  | 2407006 | 0.24437711  | 2391653 | -0.501228   | empty        |             |         |                                 |
| 2094 K21 | X | 794   | 800   | 0.76211003  | 509   | 520    | 0.08133193  | 2730445 | 1.35509461  | 2444217 | -0.29127747 | experimental | Microsource | 1300028 | Mannitol                        |
| 2094 K22 | E | 694   | 600   | -0.00353593 | 592   | 600    | 0.59911142  | 2260795 | -0.25772411 | 2501151 | -0.06387232 | empty        |             |         |                                 |
| 2094 K23 | E | 684   | 960   | 0.34722798  | 696   | 960    | 1.24789535  | 87663   | -7.72044736 | 87706   | -9.70362723 | empty        |             |         |                                 |
| 2094 K24 | P | 92098 | 92640 | 345.125294  | 88350 | 88840  | 548.060464  | 2207168 | -0.44188387 | 2639415 | -0.44406317 | empty        |             |         |                                 |
| 2094 L01 | N | 357   | 360   | -0.88610319 | 316   | 320    | -1.12266134 | 2319488 | -0.05616728 | 2457033 | -0.24008794 | empty        |             |         |                                 |
| 2094 L02 | E | 236   | 240   | -1.34247344 | 317   | 320    | -1.11642303 | 78284   | -7.75265566 | 83845   | -9.71904879 | empty        |             |         |                                 |
| 2094 L03 | E | 355   | 360   | -0.8936465  | 396   | 400    | -0.62359677 | 2329670 | -0.02120141 | 2545965 | 0.11512325  | empty        |             |         |                                 |
| 2094 L04 | E | 395   | 400   | -0.7427803  | 396   | 400    | -0.62359677 | 2934081 | 2.05439824  | 2732191 | 0.85894505  | empty        |             |         |                                 |
| 2094 L05 | E | 475   | 480   | -0.4410479  | 395   | 360    | -0.87936736 | 2472096 | 0.46790179  | 2690549 | 0.69261904  | empty        |             |         |                                 |
| 2094 L06 | E | 475   | 480   | -0.4410479  | 355   | 400    | -0.62983508 | 2959793 | 2.14269547  | 2780104 | 1.05031862  | empty        |             |         |                                 |
| 2094 L07 | E | 475   | 480   | -0.4410479  | 356   | 360    | -0.87312905 | 2423058 | 0.32010558  | 2639411 | 0.48836422  | empty        |             |         |                                 |
| 2094 L08 | E | 515   | 520   | -0.2901817  | 316   | 320    | -1.12266134 | 2889804 | 1.90234719  | 3072168 | 2.21687736  | empty        |             |         |                                 |
| 2094 L09 | E | 395   | 400   | -0.7427803  | 355   | 360    | -0.87936736 | 2532414 | 0.67503902  | 2508175 | -0.03581714 | empty        |             |         |                                 |
| 2094 L10 | E | 474   | 480   | -0.44481956 | 436   | 440    | -0.37406449 | 3073580 | 2.53344987  | 2944195 | 1.70572904  | empty        |             |         |                                 |
| 2094 L11 | E | 634   | 640   | 0.15864524  | 394   | 400    | -0.63607338 | 2472884 | 0.47060785  | 2947640 | 1.71948902  | empty        |             |         |                                 |
| 2094 L12 | E | 473   | 480   | -0.44859121 | 436   | 440    | -0.37406449 | 2717000 | 1.30892331  | 2905488 | 1.55112598  | empty        |             |         |                                 |
| 2094 L13 | E | 433   | 440   | -0.59945741 | 355   | 360    | -0.87936736 | 2267602 | -0.23434829 | 2234684 | -1.12819182 | empty        |             |         |                                 |
| 2094 L14 | E | 440   | 440   | 0.5919141   | 594   | 440    | 0.61150896  | 2964880 | 2.16105468  | 2431191 | 1.29431403  | empty        |             |         |                                 |
| 2094 L15 | E | 515   | 520   | -0.2901817  | 395   | 400    | -0.62983508 | 2454750 | 0.40833413  | 2574361 | 0.22854284  | empty        |             |         |                                 |
| 2094 L16 | E | 513   | 520   | -0.29772501 | 514   | 520    | 0.11252346  | 2837812 | 1.72380217  | 2647291 | 0.51983842  | empty        |             |         |                                 |
| 2094 L17 | E | 674   | 680   | 0.30951143  | 554   | 560    | 0.36205575  | 2444136 | 0.37188474  | 2528186 | 0.04411057  | empty        |             |         |                                 |
| 2094 L18 | E | 393   | 400   | -0.75032361 | 433   | 440    | -0.39277941 | 2540550 | 0.70297875  | 2713083 | 0.78262409  | empty        |             |         |                                 |
| 2094 L19 | E | 914   | 920   | 1.21470862  | 512   | 520    | 0.10004685  | 2341642 | 0.10911148  | 2342548 | -0.69736264 | empty        |             |         |                                 |
| 2094 L20 | E | 713   | 720   | 0.45660598  | 510   | 520    | 0.08757024  | 2488441 | 0.52403194  | 2847884 | 1.32104473  | empty        |             |         |                                 |
| 2094 L21 | E | 552   | 560   | -0.15063047 | 1594  | 1600   | 6.8498951   | 2531401 | 0.67156029  | 2364798 | -0.60849194 | empty        |             |         |                                 |
| 2094 L22 | E | 629   | 600   | 0.00023573  | 629   | 600    | 0.09819964  | 2684574 | 0.3684028   | 2846044 | 0.5852848   | empty        |             |         |                                 |
| 2094 L23 | E | 728   | 1000  | 0.5131808   | 706   | 1000   | 1.31027842  | 84312   | -7.73195498 | 85031   | -9.71431168 | empty        |             |         |                                 |
| 2094 L24 | P | 90979 | 91520 | 340.908812  | 98530 | 99080  | 611.56643   | 2180640 | -0.53298332 | 2420361 | -0.38656283 | empty        |             |         |                                 |
| 2094 M01 | N | 437   | 440   | -0.58437079 | 477   | 480    | -0.1182939  | 2118234 | -0.74729092 | 2247510 | -1.07696236 | empty        |             |         |                                 |
| 2094 M02 | E | 196   | 200   | -1.49333963 | 236   | 240    | -1.6217259  | 82695   | -7.7375079  | 85426   | -9.71273398 | empty        |             |         |                                 |
| 2094 M03 | X | 476   | 480   | -0.43727625 | 275   | 280    | -1.37843193 | 2071101 | -0.90914972 | 2440265 | -0.3070625  | experimental | Microsource | 1505426 | Ethoxzolamide                   |
| 2094 M04 | E | 435   | 440   | -0.5919141  | 356   | 360    | -0.87312905 | 2332436 | -0.01170272 | 2677193 | 0.63927266  | empty        |             |         |                                 |
| 2094 M05 | X | 435   | 440   | -0.5919141  | 595   | 600    | 0.37453236  | 2393013 | 0.19632393  | 2560620 | 0.17365809  | experimental | Microsource | 1504231 | Clarithromycin                  |
| 2094 M06 | E | 435   | 440   | -0.5919141  | 394   | 560    | 0.36829405  | 2053364 | 0.10467031  | 2837174 | 1.27826697  | empty        |             |         |                                 |
| 2094 M07 | X | 355   | 360   | -0.8936465  | 394   | 400    | -0.63607338 | 2357283 | 0.07362402  | 2628436 | 0.44452799  | experimental | Microsource | 1500368 | Lincomycin hydrochloride        |
| 2094 M08 | E | 355   | 360   | -0.8936465  | 395   | 400    | -0.62983508 | 2648535 | 1.07380858  | 2623451 | 0.42461696  | empty        |             |         |                                 |
| 2094 M09 | X | 554   | 560   | -0.14308716 | 596   | 600    | 0.62406464  | 2070673 | -0.91061951 | 2370811 | -0.58447489 | experimental | Microsource | 1503373 | Oxibendazole                    |
| 2094 M10 | E | 554   | 560   | -0.14308716 | 354   | 360    | -0.88560567 | 2413221 | 0.26571995  | 2571069 | 0.21539337  | empty        |             |         |                                 |
| 2094 M11 | X | 273   | 280   | -1.2029222  | 475   | 480    | -0.13077051 | 1929493 | -1.39544384 | 1996349 | -2.0801468  | experimental | Microsource | 1503679 | Azithromycin                    |
| 2094 M12 | E | 594   | 600   | 0.01155086  | 315   | 320    | -1.12889964 | 2559532 | 0.76164558  | 2378386 | 0.55114048  | empty        |             |         |                                 |
| 2094 M13 | X | 434   | 440   | -0.59568575 | 395   | 400    | -0.62983508 | 2274146 | -0.30459598 | 2271001 | -0.98313487 | experimental | Microsource | 1505447 | Octodrine                       |
| 2094 M14 | E | 395   | 400   | -0.7427803  | 635   | 640    | 0.86735862  | 2500059 | 0.56392916  | 2448485 | -0.27423027 | empty        |             |         |                                 |
| 2094 M15 | X | 514   | 520   | -0.29395336 | 394   | 400    | -0.63607338 | 1895739 | -1.51135799 | 2225367 | -1.16540568 | empty        |             |         |                                 |
| 2094 M16 | E | 674   | 680   | 0.30951143  | 673   | 680    | 1.10441429  | 2477083 | 0.48502758  | 2522756 | 0.02242213  | empty        |             |         |                                 |
| 2094 M17 | X | 633   | 640   | 0.15487358  | 553   | 560    | 0.35581744  | 1912396 | -1.45415641 | 2421428 | -0.38230103 | experimental | Microsource | 1505265 | Telithromycin                   |
| 2094 M18 | E | 394   | 400   | -0.7465195  | 713   | 720    | 1.35394657  | 2206617 | -0.44377605 | 2573435 | 0.22484362  | empty        |             |         |                                 |
| 2094 M19 | X | 434   | 440   | -0.59568575 | 953   | 960    | 2.85114027  | 1949547 | -1.32657667 | 2224699 | -1.16807328 | experimental | Microsource | 1300039 | Sodium phenylacetate            |
| 2094 M20 | E | 553   | 560   | -0.14685881 | 672   | 680    | 1.09817598  | 2383845 | 0.16484023  | 2662524 | 0.58068819  | empty        |             |         |                                 |
| 2094 M21 | X | 673   | 680   | 0.30573978  | 429   | 440    | -0.41773264 | 1925333 | -1.40972964 | 2407490 | -0.43797204 | experimental | Microsource | 1502036 | Vigabatrin                      |
| 2094 M22 | E | 632   | 640   | 0.15110193  | 632   | 640    | 0.8486437   | 2388588 | 0.1811281   | 2409723 | -0.42905301 | empty        |             |         |                                 |
| 2094 M23 | E | 682   | 960   | 0.33968467  | 702   | 1000   | 1.28532519  | 84112   | -7.7326418  | 87475   | -9.70454988 | empty        |             |         |                                 |
| 2094 M24 | P | 92616 | 93200 | 347.083011  | 99534 | 100160 | 617.82969   | 1926643 | -1.40523098 | 2279887 | -0.94764251 | empty        |             |         |                                 |
| 2094 N01 | N | 397   | 400   | -0.73523699 | 476   | 480    | -0.1245322  | 1885794 | -1.54550998 | 2078705 | -1.75120139 | empty        |             |         |                                 |
| 2094 N02 | E | 237   | 240   | -1.33870178 | 275   | 280    | -1.37843193 | 79803   | -7.74743928 | 79828   | -9.73509345 | empty        |             |         |                                 |
| 2094 N03 | E | 315   | 320   | -1.04451269 | 556   | 560    | 0.37453236  | 2393013 | 0.19632393  | 2560620 | 0.17365809  | empty        |             |         |                                 |
| 2094 N04 | E | 435   | 440   | -0.5919141  | 394   | 400    | -0.63607338 | 2234148 | -0.34923222 | 2348861 | -0.67214733 | empty        |             |         |                                 |
| 2094 N05 | E | 435   | 440   | -0.5919141  | 595   | 600    | 0.61782634  | 2722037 | 1.32622081  | 2689811 | 0.68967133  | empty        |             |         |                                 |
| 2094 N06 | E | 395   | 400   | -0.7427803  | 593   | 600    | 0.60534972  | 2210642 | -0.42995385 | 2499481 | -0.07054262 | empty        |             |         |                                 |
| 2094 N07 | E | 435   | 440   | -0.5919141  | 714   | 720    | 1.36018488  | 2481636 | 0.50066298  | 2521108 | 0.0158397   | empty        |             |         |                                 |
| 2094 N08 | E | 434   | 440   | -0.59568575 | 474   | 480    | -0.13700882 | 2239028 | -0.33247388 | 2550771 | 0.13431932  | empty        |             |         |                                 |
| 2094 N09 | E | 589   | 600   | -0.01107924 | 394   | 400    | -0.63607338 | 2495213 | 0.52478757  | 2474240 | -0.17135994 | empty        |             |         |                                 |
| 2094 N10 | E | 574   | 600   | 0.30951143  | 574   | 580    | 1.11876177  | 2245094 | -0.31164271 | 2433381 | -0.39047114 | empty        |             |         |                                 |
| 2094 N11 | E | 473   | 480   | -0.44859121 | 514   | 520    | 0.11252346  | 2555942 | 0.70545973  | 2663558 | 0.58481189  | empty        |             |         |                                 |
| 2094 N12 | E | 634   | 640   | 0.15864524  | 435   | 440    | -0.38030279 | 2203292 | -0.45519439 | 2241393 | -1.10139481 | empty        |             |         |                                 |
| 2094 N13 | E | 634   | 640   | 0.15864524  | 515   | 520    | 0.11876177  | 2214335 | -0.41727177 | 2512611 | -0.01809892 | empty        |             |         |                                 |
| 2094 N14 | E | 434   | 440   | -0.59568575 | 393   | 400    | -0.64231169 | 2104296 | -0.79515522 | 2364154 | -0.6110642  | empty        |             |         |                                 |
| 2094 N15 | E | 355   | 360   | -0.8936465  | 473   | 480    | -0.14324713 | 2238384 | -0.33648543 | 2440693 | -0.30535299 | empty        |             |         |                                 |
| 2094 N16 | E | 434   | 440   | -0.59568575 | 953   | 960    | 2.85114027  | 2131121 | -0.70303585 | 2229320 | -1.14961665 | empty        |             |         |                                 |
| 2094 N17 | E | 554   | 560   | -0.14308716 | 593   | 600    | 0.60534972  | 2482027 | 0.50200571  | 2502906 | -0.05868252 | empty        |             |         |                                 |
| 2094 N18 | E | 475   | 480   | -0.4410479  | 473   | 480    | -0.14324713 | 2011723 | -1.1305589  | 240427  | -1.1305589  | empty        |             |         |                                 |

|          |   |        |        |             |        |        |             |         |              |         |             |              |             |         |                                   |
|----------|---|--------|--------|-------------|--------|--------|-------------|---------|--------------|---------|-------------|--------------|-------------|---------|-----------------------------------|
| 2094 007 | X | 514    | 520    | -0.29395336 | 434    | 440    | -0.3865411  | 2107642 | -0.78366476  | 2397762 | -0.4768275  | experimental | Microsource | 1504183 | Trifluridine                      |
| 2094 008 | E | 750    | 760    | 0.59615721  | 395    | 400    | -0.62983508 | 2152214 | -0.63060066  | 2490809 | -0.10518022 | empty        |             |         |                                   |
| 2094 009 | X | 1993   | 2000   | 5.28432432  | 475    | 480    | -0.13077051 | 2065748 | -0.92753238  | 2194408 | -1.28906177 | experimental | Microsource | 1503938 | Ribavirin                         |
| 2094 010 | X | 548    | 560    | -0.16571709 | 434    | 440    | -0.3865411  | 2095781 | -0.82439646  | 2425311 | -0.3667916  | empty        |             |         |                                   |
| 2094 011 | X | 835    | 840    | 0.91674788  | 635    | 640    | 0.86735862  | 2144914 | -0.6556694   | 2503625 | -0.0839907  | experimental | Microsource | 1505705 | Fludarabine phosphate             |
| 2094 012 | E | 473    | 480    | -0.44859121 | 474    | 480    | -0.13700882 | 1972873 | -1.24647317  | 2180920 | -1.34293539 | empty        |             |         |                                   |
| 2094 013 | X | 632    | 640    | 0.15110193  | 513    | 520    | 0.10628516  | 1976068 | -1.23550126  | 2251314 | -1.06176846 | experimental | Microsource | 1504263 | Rosiglitazone                     |
| 2094 014 | E | 714    | 720    | 0.46037763  | 814    | 880    | 2.35831401  | 2047359 | -0.9906818   | 2316723 | -0.80051257 | empty        |             |         |                                   |
| 2094 015 | X | 433    | 440    | -0.59945741 | 573    | 520    | 0.10628516  | 1972674 | -1.24715655  | 2400754 | -0.46487689 | experimental | Microsource | 1505684 | Rolitetracycline                  |
| 2094 016 | E | 394    | 400    | -0.74655195 | 553    | 560    | 0.35581744  | 2010187 | -1.11833366  | 2467901 | -0.1966791  | empty        |             |         |                                   |
| 2094 017 | X | 514    | 520    | -0.29395336 | 434    | 440    | -0.3865411  | 2306957 | -0.09919981  | 2519323 | 0.00871008  | experimental | Microsource | 1505703 | Altrenogest                       |
| 2094 018 | E | 434    | 440    | -0.59568575 | 554    | 560    | 0.36205575  | 2279155 | -0.19467429  | 2791712 | 0.73728605  | empty        |             |         |                                   |
| 2094 019 | X | 594    | 600    | 0.00777904  | 634    | 640    | 0.86112031  | 2167943 | -0.57658591  | 2359552 | -0.62944546 | experimental | Microsource | 1505704 | Bisoprolol fumarate               |
| 2094 020 | E | 474    | 480    | -0.44481956 | 552    | 560    | 0.34957913  | 2103629 | -0.79744575  | 2372816 | -0.57646654 | empty        |             |         |                                   |
| 2094 021 | X | 513    | 520    | -0.29772501 | 632    | 640    | 0.8486437   | 2063197 | -0.93629274  | 2433670 | -0.33340417 | experimental | Microsource | 1503432 | Mepartricin                       |
| 2094 022 | E | 591    | 600    | -0.00353593 | 551    | 560    | 0.34334083  | 1948787 | -1.32918657  | 2287972 | -0.91534949 | empty        |             |         |                                   |
| 2094 023 | E | 834    | 1200   | 0.91297623  | 697    | 1120   | 1.25413366  | 77961   | -7.75376487  | 82248   | -9.72542751 | empty        |             |         |                                   |
| 2094 024 | P | 121232 | 122960 | 458.407179  | 142406 | 143240 | 885.278391  | 1914603 | -1.44657739  | 2244785 | -1.08784652 | empty        |             |         |                                   |
| 2094 P01 | N | 558    | 560    | -0.12800054 | 758    | 760    | 1.63467039  | 1445369 | -3.05796753  | 1708434 | -3.23013366 | empty        |             |         |                                   |
| 2094 P02 | E | 237    | 240    | -1.33870178 | 315    | 320    | -1.12889964 | 73515   | -7.76903282  | 75780   | -9.75126192 | empty        |             |         |                                   |
| 2094 P03 | E | 396    | 400    | -0.73900864 | 556    | 560    | 0.37453236  | 1908186 | -1.46861392  | 2062126 | -1.81742105 | empty        |             |         |                                   |
| 2094 P04 | E | 475    | 480    | -0.4410479  | 476    | 480    | -0.1245322  | 2070446 | -0.91139904  | 2284263 | -0.93016394 | empty        |             |         |                                   |
| 2094 P05 | E | 755    | 760    | 0.61501549  | 396    | 400    | -0.62359677 | 1994058 | -1.17372204  | 2152705 | -1.45563142 | empty        |             |         |                                   |
| 2094 P06 | E | 555    | 560    | -0.1393155  | 476    | 480    | -0.1245322  | 2230951 | -0.36021099  | 2213344 | -1.21342781 | empty        |             |         |                                   |
| 2094 P07 | E | 475    | 480    | -0.4410479  | 436    | 460    | -0.37406449 | 2080442 | -0.87707192  | 2075957 | -1.76217742 | empty        |             |         |                                   |
| 2094 P08 | E | 635    | 640    | 0.91674788  | 476    | 480    | -0.1245322  | 2254608 | -0.27897081  | 2519323 | -0.79784545 | empty        |             |         |                                   |
| 2094 P09 | E | 471    | 480    | -0.45613452 | 636    | 640    | 0.87359693  | 2167320 | -0.57882535  | 2241207 | -1.0213773  | empty        |             |         |                                   |
| 2094 P10 | E | 596    | 600    | 0.01532235  | 516    | 520    | 0.12500008  | 2253452 | -0.28294061  | 2250766 | -1.06395728 | empty        |             |         |                                   |
| 2094 P11 | E | 355    | 360    | -0.8936465  | 396    | 400    | -0.62359677 | 1971532 | -1.25107828  | 2283540 | -0.93305173 | empty        |             |         |                                   |
| 2094 P12 | E | 434    | 440    | -0.59568575 | 356    | 360    | -0.87312905 | 1769895 | -1.94351717  | 2098627 | -1.67162916 | empty        |             |         |                                   |
| 2094 P13 | E | 1075   | 1080   | 1.82194507  | 516    | 520    | 0.12500008  | 1967675 | -1.26432355  | 2065146 | -1.80535886 | empty        |             |         |                                   |
| 2094 P14 | E | 552    | 560    | -0.15063047 | 555    | 560    | 0.36829405  | 2058646 | -0.95192127  | 2156045 | -1.44229083 | empty        |             |         |                                   |
| 2094 P15 | E | 955    | 960    | 1.36934648  | 475    | 480    | -0.13077051 | 1931676 | -1.38794723  | 2087775 | -1.71494741 | empty        |             |         |                                   |
| 2094 P16 | E | 1640   | 1640   | 2.01429948  | 820    | 820    | 72.44543    | 72.2578 | -7.72725055  | 1774742 | -1.4649577  | empty        |             |         |                                   |
| 2094 P17 | E | 595    | 600    | 0.01155069  | 435    | 440    | -0.38030279 | 2015967 | -1.09848464  | 2137919 | -1.5146895  | empty        |             |         |                                   |
| 2094 P18 | E | 555    | 560    | -0.1393155  | 676    | 680    | 1.12312921  | 1947743 | -1.33277176  | 2172932 | -1.37484097 | empty        |             |         |                                   |
| 2094 P19 | E | 635    | 640    | 0.16241689  | 515    | 520    | 0.11876177  | 2106786 | -0.78660434  | 2160201 | -1.42569098 | empty        |             |         |                                   |
| 2094 P20 | E | 435    | 440    | -0.5919141  | 475    | 480    | -0.13077051 | 1978735 | -1.22634255  | 2321854 | -0.78001839 | empty        |             |         |                                   |
| 2094 P21 | E | 755    | 760    | 0.61501549  | 755    | 760    | 1.61595547  | 1941425 | -1.35446832  | 2210388 | -1.22523463 | empty        |             |         |                                   |
| 2094 P22 | E | 791    | 800    | 0.75079506  | 712    | 720    | 1.34770826  | 1873897 | -1.58636531  | 2329654 | -0.74886371 | empty        |             |         |                                   |
| 2094 P23 | P | 175319 | 175680 | 659.010191  | 170541 | 170960 | 1060.793116 | 1681626 | -2.24664655  | 1736780 | -3.11691438 | empty        |             |         |                                   |
| 2095 A01 | N | 477    | 480    | -0.0555226  | 558    | 560    | -0.21963478 | 1069816 | -0.88746142  | 1112605 | -0.98541242 | empty        |             |         |                                   |
| 2095 A02 | E | 116    | 120    | -1.97931998 | 116    | 120    | -2.24355551 | 74953   | -3.00795158  | 81357   | -3.13425676 | empty        |             |         |                                   |
| 2095 A03 | X | 716    | 720    | 1.21812718  | 796    | 800    | 0.87016869  | 986113  | -1.06586929  | 1003840 | -1.21204952 | experimental | Prestick    | 1       | Azaguanine-8                      |
| 2095 A04 | X | 875    | 880    | 2.06545068  | 675    | 680    | 0.31610894  | 1285512 | -0.42771848  | 1241109 | -0.71764454 | experimental | Prestick    | 81      | Metronidazole                     |
| 2095 A05 | X | 675    | 680    | 0.99963496  | 435    | 440    | -0.78285254 | 1346631 | -0.29744704  | 1492522 | -0.19376725 | experimental | Prestick    | 2       | Allantoin                         |
| 2095 A06 | X | 440    | 440    | -0.27934391 | 814    | 820    | 0.67785043  | 1484662 | -0.003320972 | 1810032 | 0.46695045  | experimental | Prestick    | 82      | Cotinine (-)                      |
| 2095 A07 | X | 635    | 640    | 0.78647181  | 833    | 840    | 0.03959192  | 1474861 | -0.03787867  | 197576  | 0.23351033  | experimental | Prestick    | 3       | Acetazolamide                     |
| 2095 A08 | X | 715    | 720    | 1.2127981   | 993    | 1000   | 1.77223291  | 1594167 | 0.23016093   | 1810237 | 0.46826563  | experimental | Prestick    | 83      | Edrophonium chloride              |
| 2095 A09 | X | 555    | 560    | 0.36014553  | 794    | 800    | 0.86101068  | 1415196 | -0.1513049   | 1681780 | 0.20059568  | experimental | Metformin   | 4       | Metformin hydrochloride           |
| 2095 A10 | X | 756    | 760    | 1.43129032  | 755    | 760    | 0.68242944  | 1440639 | -0.09707469  | 1560888 | -0.05131084 | experimental | Prestick    | 84      | Moroxidine hydrochloride          |
| 2095 A11 | X | 475    | 480    | -0.06618076 | 475    | 480    | -0.59969229 | 1371485 | -0.24447224  | 1444196 | -0.29446568 | experimental | Atracurium  | 5       | Atracurium besylate               |
| 2095 A12 | X | 555    | 560    | 0.36014553  | 475    | 480    | -0.59511328 | 1592778 | 0.22720036   | 1387308 | -0.41300502 | experimental | Prestick    | 85      | Baclofen (R,S)                    |
| 2095 A13 | X | 676    | 680    | 1.00496404  | 356    | 360    | -1.14917303 | 1470618 | -0.03317627  | 1335015 | -0.52196961 | experimental | Prestick    | 6       | Isoflupredone acetate             |
| 2095 A14 | X | 514    | 520    | -0.14165333 | 555    | 560    | -0.23373718 | 1347372 | -0.29586764  | 1487760 | -0.20368998 | experimental | Prestick    | 86      | Acyclovir                         |
| 2095 A15 | X | 913    | 920    | 2.26795566  | 794    | 800    | 0.86101068  | 1400331 | -0.18298875  | 1813612 | 0.47529822  | experimental | Prestick    | 7       | Amiloride hydrochloride dihydrate |
| 2095 A16 | X | 513    | 520    | 0.13632423  | 432    | 440    | -0.79658956 | 1463218 | -0.04894892  | 1897320 | 0.64972325  | experimental | Prestick    | 87      | Diazoxide                         |
| 2095 A17 | X | 516    | 520    | 0.15231146  | 834    | 840    | 1.04417093  | 1547668 | 0.13105114   | 1708512 | 0.256298    | experimental | Prestick    | 8       | Amprolium hydrochloride           |
| 2095 A18 | X | 436    | 440    | -0.27401483 | 873    | 880    | 1.22275217  | 1549422 | -0.13478968  | 1803510 | 0.45424836  | experimental | Prestick    | 88      | Acetylpyrine                      |
| 2095 A19 | X | 515    | 520    | 0.14698238  | 953    | 960    | 1.58907266  | 1439839 | -0.09877984  | 1975493 | 0.81261482  | experimental | Prestick    | 9       | Hydrochlorothiazide               |
| 2095 A20 | X | 516    | 520    | 0.15231146  | 952    | 960    | -1.58449365 | 1329018 | -0.33498808  | 2103997 | 1.08038271  | experimental | Prestick    | 89      | Ursolic acid                      |
| 2095 A21 | X | 555    | 560    | 0.36014553  | 952    | 960    | 1.58449365  | 1466107 | -0.04279119  | 2001471 | 0.86574601  | experimental | Prestick    | 10      | Sulfaguanidine                    |
| 2095 A22 | X | 513    | 520    | 0.13632423  | 1031   | 1040   | 1.94623514  | 1264065 | -0.47343146  | 1927107 | 0.71179137  | experimental | Prestick    | 90      | Pindolol                          |
| 2095 A23 | E | 624    | 1240   | 0.72785195  | 597    | 1400   | -0.04105354 | 78199   | -3.00103292  | 83175   | -3.13046854 | empty        |             |         |                                   |
| 2095 A24 | P | 210934 | 211360 | 1121.48637  | 274635 | 275280 | 1254.78064  | 1118123 | -0.78449798  | 1065755 | -1.08303526 | empty        |             |         |                                   |
| 2095 B01 | N | 757    | 760    | 1.4366194   | 477    | 480    | -0.59053428 | 1175492 | -0.66221944  | 1264370 | -0.66917485 | empty        |             |         |                                   |
| 2095 B02 | E | 116    | 120    | -1.97931998 | 117    | 120    | -2.2389765  | 81016   | -2.99502866  | 83869   | -3.12902243 | empty        |             |         |                                   |
| 2095 B03 | X | 515    | 520    | 0.14698238  | 554    | 560    | -0.2379508  | 1521798 | 0.0759108    | 1548193 | -0.07776381 | experimental | Prestick    | 161     | Isoniazid                         |
| 2095 B04 | X | 474    | 480    | -0.07150984 | 474    | 480    | -0.24710883 | 1566279 | 0.17711367   | 1597488 | 0.02495375  | experimental | Prestick    | 58      | Penicillietine hydrochloride      |
| 2095 B05 | X | 434    | 440    | -0.28467298 | 433    | 440    | -0.79201055 | 1599674 | 0.24189877   | 1607502 | 0.18217549  | experimental | Prestick    | 162     | Penflutendazole                   |
| 2095 B06 | X | 435    | 440    | -0.27934391 | 953    | 960    | 1.58907266  | 1540729 | 0.11626108   | 1621622 | 0.07524254  | experimental | Prestick    | 242     | Flavoxate hydrochloride           |
| 2095 B07 | X | 435    | 440    | -0.27934391 | 550    | 560    | -0.25626683 | 1638933 | 0.32557695   | 1745988 | 0.33438794  | experimental | Prestick    | 163     | Chlorzoxazone                     |
| 2095 B08 | X | 435    | 440    | -0.27934391 | 832    | 840    | 1.03501291  | 1425563 | -0.12920827  | 1623304 | 0.07874737  | experimental | Prestick    | 243     | Bufexamac                         |
| 2095 B09 | X | 235    | 240    | -1.34515962 | 471    | 480    | -0.61800832 | 1563533 | 0.16486642   | 2031457 | 0.92922879  | experimental | Prestick    | 164     | Ornidazole                        |
| 2095 B10 | X | 435    | 440    | -0.27934391 | 553    | 560    | -0.24252981 | 1629446 | 0.30535598   | 1779646 | 0.40452218  | experimental | Prestick    | 244     | Glutethimide, para-amino          |
| 2095 B11 | X | 354    | 360    | -0.17109927 | 534    | 560    | -0.2379508  | 1848073 | 0.77134617   | 2213131 | 1.30777887  | experimental | Prestick    | 165     | Ethosux                           |

|          |   |        |        |             |        |        |             |         |             |         |             |              |              |           |                                            |            |
|----------|---|--------|--------|-------------|--------|--------|-------------|---------|-------------|---------|-------------|--------------|--------------|-----------|--------------------------------------------|------------|
| 2095 C01 | N | 516    | 520    | 0.15231146  | 317    | 320    | -1.32317527 | 1291459 | -0.41504281 | 1374978 | -0.43869743 | empty        |              |           |                                            |            |
| 2095 C02 | E | 77     | 80     | -2.18715404 | 37     | 40     | -2.60529699 | 86789   | -2.98272386 | 86038   | -3.12450282 | empty        |              |           |                                            |            |
| 2095 C03 | X | 436    | 440    | -0.27401483 | 434    | 440    | -0.78743154 | 1298869 | -0.39924884 | 1388311 | -0.41091504 | experimental | Prestwick    | 11        | Metricrane                                 |            |
| 2095 C04 | X | 315    | 320    | -0.91883334 | 994    | 1000   | -1.77681191 | 1585460 | 0.21160249  | 1554754 | -0.06490245 | experimental | Prestwick    | 91        | Khellin                                    |            |
| 2095 C05 | X | 395    | 400    | -0.49252705 | 552    | 560    | -0.24710882 | 1468288 | -0.03814252 | 1498540 | -0.18122735 | experimental | Prestwick    | 12        | Benzonate                                  |            |
| 2095 C06 | X | 475    | 480    | -0.06618076 | 549    | 560    | -0.26084583 | 1537431 | 0.10923159  | 1771848 | 0.38827324  | experimental | Prestwick    | 92        | Zimeldine dihydrochloride monohydrate      |            |
| 2095 C07 | X | 354    | 360    | -0.71099927 | 832    | 840    | 1.03501291  | 1556225 | 0.14928986  | 1683550 | 0.20428388  | experimental | Prestwick    | 13        | Hydroflumethiazide                         |            |
| 2095 C08 | X | 396    | 400    | -0.48717797 | 711    | 720    | 0.48095317  | 1655223 | 0.36232981  | 1728879 | 0.29873737  | experimental | Prestwick    | 93        | Azacyclonol                                |            |
| 2095 C09 | X | 275    | 280    | -1.13199648 | 753    | 760    | 0.67327143  | 1590969 | 0.22334459  | 1734075 | 0.30956444  | experimental | Prestwick    | 14        | Sulfacetamide sodic hydrate                |            |
| 2095 C10 | X | 516    | 520    | 0.15231146  | 553    | 560    | -0.24252981 | 1606453 | 0.2563478   | 1589078 | 0.00742956  | experimental | Prestwick    | 94        | Azathioprine                               |            |
| 2095 C11 | X | 475    | 480    | -0.06618076 | 554    | 560    | -0.23795008 | 1628992 | 0.30438831  | 1583669 | -0.00384134 | experimental | Prestwick    | 15        | Heptaminol hydrochloride                   |            |
| 2095 C12 | X | 433    | 440    | -0.29000206 | 632    | 640    | -0.79201055 | 1728662 | 0.51562887  | 1467590 | -0.24509374 | experimental | Prestwick    | 95        | Lynestrol                                  |            |
| 2095 C13 | X | 435    | 440    | -0.27934391 | 634    | 640    | 0.12836969  | 1533049 | 0.09989162  | 1565810 | -0.04105471 | experimental | Prestwick    | 16        | Sulfathiazole                              |            |
| 2095 C14 | X | 434    | 440    | -0.28467298 | 592    | 600    | -0.06394857 | 1503013 | 0.03587171  | 1483120 | -0.2133585  | experimental | Prestwick    | 96        | Guanabenz acetate                          |            |
| 2095 C15 | X | 392    | 400    | -0.50849428 | 792    | 800    | 0.85185267  | 1602778 | 0.24851476  | 1715759 | 0.2713988   | experimental | Prestwick    | 17        | Levodopa                                   |            |
| 2095 C16 | X | 671    | 680    | 0.97831864  | 549    | 560    | -0.26084583 | 1538549 | 0.11161454  | 1928029 | 0.71371257  | experimental | Prestwick    | 97        | Dulifiram                                  |            |
| 2095 C17 | X | 674    | 680    | 0.99430588  | 753    | 680    | 0.30695093  | 1633298 | 0.31356629  | 1704312 | 0.24754633  | experimental | Prestwick    | 18        | Iodouridine                                |            |
| 2095 C18 | X | 594    | 600    | 0.56797959  | 673    | 760    | 0.67327143  | 1765874 | 0.59614399  | 1932675 | 0.72339359  | experimental | Prestwick    | 98        | Acetylsalicylic acid                       |            |
| 2095 C19 | X | 274    | 280    | -1.13732556 | 632    | 640    | 0.11921168  | 1552718 | 0.14181449  | 1943245 | 0.74541864  | experimental | Prestwick    | 19        | Captopril                                  |            |
| 2095 C20 | X | 396    | 400    | -0.48717797 | 712    | 720    | 0.48553217  | 1802800 | 0.67484952  | 2117902 | 1.109357    | experimental | Prestwick    | 99        | Mianserin hydrochloride                    |            |
| 2095 C21 | X | 511    | 520    | 0.12566607  | 550    | 560    | -0.25626683 | 1629926 | 0.30637907  | 1688734 | 0.21508595  | experimental | Prestwick    | 20        | Minoxidil                                  |            |
| 2095 C22 | X | 1193   | 1200   | 3.76009767  | 1391   | 1400   | 3.59467736  | 1614260 | 0.27298794  | 1703963 | 0.2468191   | W            | experimental | Prestwick | 100                                        | Nocodazole |
| 2095 C23 | E | 336    | 760    | -0.80692269 | 552    | 1080   | -0.24710882 | 85328   | -2.98583789 | 89503   | -3.11728268 | empty        |              |           |                                            |            |
| 2095 C24 | P | 142600 | 757    | 329115      | 177846 | 178960 | 811.583212  | 1394744 | -0.1948971  | 1504340 | -0.16977933 | empty        |              |           |                                            |            |
| 2095 D01 | N | 397    | 400    | -0.48184889 | 637    | 640    | 0.14210671  | 1060048 | -0.90828132 | 1381059 | -0.42602626 | empty        |              |           |                                            |            |
| 2095 D02 | E | 77     | 80     | -2.18715404 | 37     | 40     | -2.42671572 | 86789   | -2.98272386 | 86038   | -3.12450282 | empty        |              |           |                                            |            |
| 2095 D03 | X | 396    | 400    | -0.48717797 | 476    | 480    | -0.59511328 | 1658841 | 0.36800964  | 1786368 | -0.1852903  | experimental | Prestwick    | 171       | Tranexamic acid                            |            |
| 2095 D04 | X | 396    | 400    | -0.48717797 | 553    | 360    | -1.15833104 | 1491162 | 0.01061202  | 1479979 | -0.2199035  | experimental | Prestwick    | 251       | Chlorothiazide                             |            |
| 2095 D05 | X | 315    | 320    | -0.91883334 | 632    | 640    | 0.11921168  | 1912127 | 0.90787339  | 1861575 | 0.57561949  | experimental | Prestwick    | 172       | Etofylline                                 |            |
| 2095 D06 | X | 354    | 360    | -0.71099927 | 1512   | 1520   | 4.14873711  | 1481761 | -0.00942564 | 1531713 | -0.11210372 | experimental | Prestwick    | 252       | Diphenidol hydrochloride                   |            |
| 2095 D07 | X | 876    | 880    | 2.07077976  | 990    | 1000   | 1.75849589  | 1630051 | 0.3066455   | 1683699 | 0.20459436  | experimental | Prestwick    | 173       | Tranlycypromine hydrochloride              |            |
| 2095 D08 | X | 354    | 360    | -0.71099927 | 512    | 520    | -0.43026906 | 1600705 | 0.24409628  | 1683275 | 0.20371086  | experimental | Prestwick    | 253       | Norethindrone                              |            |
| 2095 D09 | X | 476    | 480    | -0.06085168 | 514    | 520    | -0.42111105 | 1829179 | 0.73107476  | 1889753 | 0.63395565  | experimental | Prestwick    | 174       | Alverine citrate salt                      |            |
| 2095 D10 | X | 274    | 280    | -1.13732556 | 632    | 640    | 0.11921168  | 1552718 | 0.14181449  | 1943245 | 0.74541864  | experimental | Prestwick    | 254       | Proprietyline hydrochloride                |            |
| 2095 D11 | X | 434    | 440    | -0.28467298 | 514    | 520    | -0.42111105 | 1765088 | 0.59446868  | 2043412 | 0.95413981  | experimental | Prestwick    | 175       | Acedofenac                                 |            |
| 2095 D12 | X | 834    | 840    | 1.84695846  | 714    | 720    | 0.49469018  | 1832084 | 0.73726659  | 1669190 | 0.17436149  | experimental | Prestwick    | 255       | Niflumic acid                              |            |
| 2095 D13 | X | 433    | 440    | -0.29000206 | 472    | 480    | -0.61342931 | 2012906 | 1.12267772  | 1496171 | -0.18616371 | experimental | Prestwick    | 176       | Iproniazide phosphate                      |            |
| 2095 D14 | X | 875    | 880    | 2.06545068  | 834    | 840    | 1.04417093  | 1543163 | 0.121449    | 1717573 | 0.27517869  | experimental | Prestwick    | 256       | Isotretinoin                               |            |
| 2095 D15 | X | 433    | 440    | -0.29000206 | 551    | 560    | -0.25168782 | 1781415 | 0.62926869  | 2021518 | 0.90851858  | experimental | Prestwick    | 177       | Sulfamethoxazole                           |            |
| 2095 D16 | X | 755    | 760    | 1.42596125  | 1034   | 1040   | 1.95997216  | 1929209 | 0.94389898  | 1624424 | 0.08108115  | experimental | Prestwick    | 257       | Retinoic acid                              |            |
| 2095 D17 | X | 354    | 360    | -0.72161042 | 592    | 600    | -0.05394857 | 1708727 | 0.47647007  | 1708727 | 0.47647007  | experimental | Prestwick    | 178       | Mephlofenacin                              |            |
| 2095 D18 | X | 714    | 720    | 0.74699202  | 593    | 600    | -0.05936956 | 1515869 | 0.20532735  | 1507414 | -0.16273632 | experimental | Prestwick    | 258       | Antizoline hydrochloride                   |            |
| 2095 D19 | X | 515    | 520    | 0.14698238  | 433    | 440    | -0.79201055 | 1741446 | 0.54407719  | 1833698 | 0.51715206  | experimental | Prestwick    | 179       | Phenformin hydrochloride                   |            |
| 2095 D20 | X | 314    | 320    | -0.92416242 | 472    | 480    | -0.61342931 | 1546718 | 0.12902627  | 1540558 | -0.09367311 | experimental | Prestwick    | 259       | Ethacrynic acid                            |            |
| 2095 D21 | X | 674    | 680    | 0.99430588  | 793    | 800    | 0.85643167  | 1597786 | 0.23787461  | 1827193 | 0.50359738  | experimental | Prestwick    | 180       | Flutamide                                  |            |
| 2095 D22 | X | 630    | 640    | 0.75982642  | 588    | 600    | -0.08226459 | 1531459 | 0.09650263  | 1579770 | -0.01196581 | experimental | Prestwick    | 260       | Praziquantel                               |            |
| 2095 D23 | E | 419    | 880    | -0.36460916 | 482    | 960    | -0.56763925 | 87281   | -2.98167519 | 91495   | -3.11313189 | empty        |              |           |                                            |            |
| 2095 D24 | E | 156591 | 157360 | 831.888253  | 161487 | 162560 | 736.675252  | 1482139 | -0.00086195 | 1658860 | -3.12580424 | empty        |              |           |                                            |            |
| 2095 E01 | N | 675    | 680    | -0.06618076 | 677    | 680    | 0.32526696  | 1342027 | -0.30786019 | 1435483 | -0.32621213 | empty        |              |           |                                            |            |
| 2095 E02 | E | 157    | 160    | -1.76082776 | 76     | 80     | -2.42671575 | 92131   | -2.97133771 | 94425   | -3.10702656 | empty        |              |           |                                            |            |
| 2095 E03 | X | 356    | 360    | -0.70034111 | 396    | 400    | -0.96143378 | 1394852 | -0.1946669  | 1263812 | -0.67033757 | experimental | Prestwick    | 21        | Sulfaphenazole                             |            |
| 2095 E04 | X | 475    | 480    | -0.06618076 | 355    | 360    | -1.14917303 | 1266688 | -0.46784069 | 999068  | -1.22199309 | experimental | Prestwick    | 101       | R(-) Apomorphine hydrochloride hemihydrate |            |
| 2095 E05 | X | 396    | 400    | -0.48717797 | 394    | 400    | -0.97059179 | 1548762 | 0.13338293  | 1525810 | -0.12440398 | experimental | Prestwick    | 22        | Panthenol (D)                              |            |
| 2095 E06 | X | 276    | 280    | -1.1266674  | 511    | 520    | -0.43484807 | 1312411 | -0.37038489 | 1480965 | -0.21784894 | experimental | Prestwick    | 102       | Amoxapine                                  |            |
| 2095 E07 | X | 395    | 400    | -0.49250705 | 473    | 480    | -0.6088503  | 1519615 | 0.07125787  | 1888622 | 0.62805561  | experimental | Prestwick    | 253       | Sulfadiazine                               |            |
| 2095 E08 | X | 276    | 280    | -1.1266674  | 395    | 400    | -0.96501278 | 1387656 | -0.21000474 | 1627665 | 0.08783453  | experimental | Prestwick    | 103       | Cyproheptadine hydrochloride               |            |
| 2095 E09 | X | 395    | 400    | -0.49250705 | 474    | 480    | -0.6042713  | 1514009 | 0.05930902  | 1509887 | -0.15758325 | experimental | Prestwick    | 24        | Norethynodrel                              |            |
| 2095 E10 | X | 355    | 360    | -0.70567019 | 475    | 480    | -0.59969229 | 1529048 | 0.09136373  | 1495476 | -0.18761191 | experimental | Prestwick    | 104       | Fenpropion                                 |            |
| 2095 E11 | X | 475    | 480    | -0.06618076 | 354    | 360    | -1.15375204 | 1827285 | 0.72703701  | 1519471 | -0.13761276 | experimental | Prestwick    | 25        | Thiamphenicol                              |            |
| 2095 E12 | X | 674    | 680    | 0.99430588  | 474    | 480    | -0.6042713  | 1576711 | 0.19295453  | 1268809 | -0.65992516 | experimental | Prestwick    | 105       | Danzol                                     |            |
| 2095 E13 | X | 354    | 360    | -0.71099927 | 474    | 480    | -0.6042713  | 1695164 | 0.44542991  | 1264050 | -0.66984164 | experimental | Prestwick    | 26        | Cimetidine                                 |            |
| 2095 E14 | X | 475    | 480    | -0.06618076 | 474    | 480    | -0.6042713  | 1627708 | 0.30165154  | 1264161 | -0.66961035 | experimental | Prestwick    | 106_2009  | Nicorandil                                 |            |
| 2095 E15 | X | 316    | 320    | -0.91350426 | 316    | 480    | -0.59969229 | 1657895 | 0.3659933   | 1506466 | -0.16471169 | experimental | Prestwick    | 27        | Doxylamine succinate                       |            |
| 2095 E16 | X | 194    | 200    | -1.56365185 | 353    | 360    | -1.15833104 | 812232  | -1.4364861  | 841594  | -1.55012668 | experimental | Prestwick    | 107_2009  | Tomatine                                   |            |
| 2095 E17 | X | 475    | 480    | -0.06618076 | 594    | 600    | -0.05479056 | 1971762 | 1.03498178  | 1606287 | 0.04328851  | experimental | Prestwick    | 28        | Ethambutol dihydrochloride                 |            |
| 2095 E18 | X | 554    | 560    | 0.35481645  | 633    | 640    | 0.12379068  | 1879696 | 0.83874868  | 1783284 | 0.4121028   | experimental | Prestwick    | 108       | Nomifensine maleate                        |            |
| 2095 E19 | X | 474    | 480    | -0.07150984 | 673    | 680    | 0.30695093  | 1713165 | 0.48379795  | 1837063 | 0.52416382  | experimental | Prestwick    | 29        | Antipyrene                                 |            |
| 2095 E20 | X | 433    | 440    | -0.29000206 | 712    | 720    | 0.48553217  | 1827923 | 0.72839767  | 2086805 | 1.04455919  | experimental | Prestwick    | 30        | Dizocilpine maleate                        |            |
| 2095 E21 | X | 633    | 640    | 0.77581366  | 912    | 920    | 1.40133341  | 1612297 | 0.26880393  | 2005567 | 0.87628098  | experimental | Prestwick    | 109       | Antipyrene, 4-hydroxy                      |            |
| 2095 E22 | X | 632    | 640    | 0.77048458  | 870    | 880    | 1.20901515  | 1519354 | 0.07112785  | 2053330 | 0.98105746  | experimental | Prestwick    | 110       | Acenocoumarol                              |            |
| 2095 E23 | X | 603    | 600    | -1.302527   | 400    | 960    | -0.94311275 | 89070   | -2.97786205 | 99804   | -3.09581816 | empty        |              |           |                                            |            |
| 2095 E24 | P | 120409 | 121160 | 639.071532  | 189616 | 190560 | 865.478114  | 2266807 | 1.6638523   | 1563798 | -0.04524718 | empty        |              |           |                                            |            |
| 2095 F01 | N | 997    | 1000   | 2.71559827  | 436    | 440    | -0.77827353 | 1111255 | -0.79913671 | 1548458 | -0.07721162 | empty        |              |           |                                            |            |
| 2095 F02 | E | 75     | 80     | -2.1978122  | 77     | 80     | -2.42213675 | 87729   | -2.98072031 | 85105   | -3.12644694 | empty        |              |           |                                            |            |
| 2095 F03 | X | 316    | 320    | -0.91350426 | 316    | 320    | -1.327      |         |             |         |             |              |              |           |                                            |            |

|          |   |        |        |            |             |        |            |             |             |             |             |              |              |              |           |     |                                     |            |
|----------|---|--------|--------|------------|-------------|--------|------------|-------------|-------------|-------------|-------------|--------------|--------------|--------------|-----------|-----|-------------------------------------|------------|
| 2095 F19 | X |        | 593    | 600        | 0.56265051  | 712    | 720        | 0.48553217  | 1596053     | 0.23418083  | 1864795     | 0.58194987   | experimental |              |           |     |                                     |            |
| 2095 F20 | X |        | 833    | 840        | 1.84162938  | 512    | 520        | -0.43026906 | 1156069     | -0.70361838 | 1280867     | -0.63479952  | experimental | Prestwick    | 189       |     | Aminopurine, 6-benzyl               |            |
| 2095 F21 | X |        | 511    | 520        | 0.12566607  | 510    | 520        | -0.43942707 | 1607777     | 0.25916982  | 1821835     | 0.49243275   | experimental | Prestwick    | 269       |     | Clomipramine hydrochloride          |            |
| 2095 F22 | X |        | 713    | 720        | 1.20213994  | 830    | 840        | 0.10258549  | 962091      | -1.11707073 | 1067345     | -1.07972213  | experimental | Prestwick    | 270       |     | Tolbutamide                         |            |
| 2095 F23 | E |        | 300    | 600        | -0.99876952 | 521    | 1000       | -0.38958801 | 88902       | -0.97822013 | 867007      | -3.1211088   | empty        |              |           |     | Fendiline hydrochloride             |            |
| 2095 F24 | P | 100855 | 101600 | 534.866729 | 161449      | 162600 | 736.501247 | 1493583     | 0.01577224  | 1698611     | 0.23566697  |              | empty        |              |           |     |                                     |            |
| 2095 G01 | N |        | 395    | 400        | -0.49250705 | 558    | 560        | -0.21963478 | 1325965     | -0.34149536 | 1487145     | -0.20497148  | empty        |              |           |     |                                     |            |
| 2095 G02 | E |        | 117    | 120        | -1.9739909  | 36     | 40         | -2.609876   | 86105       | -2.98418176 | 94253       | -3.10738496  | empty        |              |           |     |                                     |            |
| 2095 G03 | X |        | 397    | 400        | -0.48184889 | 516    | 520        | -0.41195304 | 1374529     | -0.23798414 | 1241677     | -0.71646098  | experimental | Prestwick    | 31        |     | Chloramphenicol                     |            |
| 2095 G04 | X |        | 355    | 360        | -0.70567019 | 514    | 520        | -0.42111105 | 1558549     | 0.15424333  | 1518264     | -0.14012783  | experimental | Prestwick    | 311       |     | Naloxone hydrochloride              |            |
| 2095 G05 | X |        | 475    | 480        | -0.06618076 | 553    | 560        | -0.24252981 | 1396312     | -0.18729212 | 1488988     | -0.20113116  | experimental | Prestwick    | 322       |     | Epirizole                           |            |
| 2095 G06 | X |        | 475    | 480        | -0.06618076 | 553    | 560        | -0.06618076 | 122733117   | 1583662     | 0.20777916  | 1567402      | 0.54964577   | experimental | Prestwick | 312 |                                     | Metolazone |
| 2095 G07 | X |        | 275    | 280        | -1.13199648 | 434    | 440        | -0.78743154 | 1481486     | -0.01001178 | 1618513     | 0.06876421   | experimental | Prestwick    | 33        |     | Diprophylline                       |            |
| 2095 G08 | X |        | 355    | 360        | -0.70567019 | 435    | 440        | -0.78285254 | 1780999     | 0.62838201  | 1936741     | 0.73186605   | experimental | Prestwick    | 113       |     | Ciprofloxacin hydrochloride         |            |
| 2095 G09 | X |        | 634    | 640        | 0.78114274  | 514    | 520        | -0.42111105 | 7341970     | 12.4812545  | 7456374     | 12.2333014   | experimental | Prestwick    | 34        |     | Triamterene                         |            |
| 2095 G10 | X |        | 434    | 440        | -0.28467298 | 394    | 400        | -0.97059179 | 1571461     | 0.18176447  | 1457166     | -0.26743968  | experimental | Prestwick    | 114       |     | Ampicillin trihydrate               |            |
| 2095 G11 | X |        | 355    | 360        | -0.70567019 | 315    | 320        | -1.33233328 | 1450226     | -0.07664058 | 1371547     | -0.44584672  | experimental | Prestwick    | 35        |     | Dapsone                             |            |
| 2095 G12 | X |        | 316    | 320        | -0.91350426 | 355    | 360        | -1.14917303 | 1384050     | -0.21769071 | 1393849     | -0.39937533  | experimental | Prestwick    | 115       |     | Haloperidol                         |            |
| 2095 G13 | X |        | 435    | 440        | -0.27934391 | 515    | 520        | -0.41653204 | 1333024     | -0.32644953 | 1341462     | -0.50853579  | experimental | Prestwick    | 36        |     | Troisandamycin                      |            |
| 2095 G14 | X |        | 355    | 360        | -0.70567019 | 394    | 400        | -0.97059179 | 1361086     | -0.26663708 | 1304207     | -0.58616522  | experimental | Prestwick    | 116       |     | Nalrexone hydrochloride dihydrate   |            |
| 2095 G15 | X |        | 515    | 520        | 0.14698238  | 515    | 520        | -0.41653204 | 1303457     | -0.3894698  | 1330362     | -0.53166521  | experimental | Prestwick    | 37        |     | Pyrimethamine                       |            |
| 2095 G16 | X |        | 475    | 480        | -0.06618076 | 474    | 480        | -0.6042713  | 1584970     | 0.21055809  | 1636432     | 0.1061026    | experimental | Prestwick    | 117       |     | Chlorpheniramine maleate            |            |
| 2095 G17 | X |        | 313    | 320        | -0.92949149 | 474    | 480        | -0.6042713  | 1396491     | -0.19117347 | 1500955     | -0.17619514  | experimental | Prestwick    | 38        |     | Hexamethonium dibromide dihydrate   |            |
| 2095 G18 | X |        | 675    | 680        | 0.99963496  | 553    | 560        | -0.24252981 | 1556578     | 0.15004226  | 1800478     | 0.44793049   | experimental | Prestwick    | 118       |     | Nalbufine hydrochloride             |            |
| 2095 G19 | X |        | 713    | 720        | 1.20213994  | 953    | 960        | 1.58907266  | 1637808     | 0.32317908  | 1642561     | 0.1188738    | experimental | Prestwick    | 39        |     | Diflunisal                          |            |
| 2095 G20 | X |        | 751    | 760        | 1.404646203 | 874    | 880        | 0.476537416 | 1755541     | 0.24179646  | 1572863     | 0.76294749   | experimental | Prestwick    | 49        |     | Tolazamide monohydrate              |            |
| 2095 G21 | X |        | 1070   | 1080       | 3.1104621   | 1149   | 1160       | 2.4865787   | 879556      | -1.07584513 | 1267043     | -0.66360503  | experimental | Prestwick    | 119       |     | Niclosamide                         |            |
| 2095 G22 | X |        | 791    | 800        | 1.61780808  | 1029   | 1040       | 1.93707713  | 1658280     | 0.36681391  | 1997744     | 0.85897994   | experimental | Prestwick    | 120       |     | Triamcinolone                       |            |
| 2095 G23 | E |        | 402    | 800        | -0.45252035 | 354    | 960        | -1.15375204 | 87425       | -2.98136826 | 89949       | -3.11635334  | empty        |              |           |     |                                     |            |
| 2095 G24 | P | 134677 | 135440 | 715.106825 | 204941      | 206040 | 935.651384 | 1435888     | -0.10720116 | 1435888     | -0.10720116 | 1573801      | -0.02440361  | empty        |           |     |                                     |            |
| 2095 H01 | N |        | 477    | 480        | -0.0555226  | 317    | 320        | -1.32317527 | 1290272     | -0.41757283 | 1384523     | -0.41880821  | empty        |              |           |     |                                     |            |
| 2095 H02 | E |        | 117    | 120        | -1.9739909  | 77     | 80         | -2.42213675 | 87087       | -2.98208869 | 83116       | -3.13059148  | empty        |              |           |     |                                     |            |
| 2095 H03 | X |        | 396    | 400        | -0.48717797 | 434    | 440        | -0.78743154 | 1630971     | 0.30860664  | 1710209     | 0.25983409   | experimental | Prestwick    | 191       |     | Midodrine hydrochloride             |            |
| 2095 H04 | X |        | 395    | 400        | -0.49250705 | 394    | 400        | -0.97059179 | 1519891     | 0.07184705  | 1697337     | 0.05017075   | experimental | Prestwick    | 271       |     | Vincamine                           |            |
| 2095 H05 | X |        | 395    | 400        | -0.49250705 | 394    | 400        | -0.97059179 | 1833667     | 0.74064066  | 1768650     | 0.38160947   | experimental | Prestwick    | 192       |     | Thalidomide                         |            |
| 2095 H06 | X |        | 555    | 560        | 0.36014553  | 474    | 480        | -0.6042713  | 1619896     | 0.28500074  | 1737364     | 0.31641783   | experimental | Prestwick    | 272       |     | Indomethacin                        |            |
| 2095 H07 | X |        | 475    | 480        | -0.06618076 | 434    | 440        | -1.33691228 | 1701176     | 0.45824413  | 1806300     | 0.46006197   | experimental | Prestwick    | 193       |     | Oxolinic acid                       |            |
| 2095 H08 | X |        | 435    | 440        | -0.27934391 | 434    | 440        | -0.78743154 | 1754534     | 0.57197347  | 1710374     | 0.26017791   | experimental | Prestwick    | 273       |     | Cortisone                           |            |
| 2095 H09 | X |        | 593    | 600        | 0.56265051  | 434    | 440        | -0.78743154 | 1784903     | 0.63670315  | 1827754     | 0.50476636   | experimental | Prestwick    | 194       |     | Nimesulide                          |            |
| 2095 H10 | X |        | 792    | 800        | 1.62313715  | 554    | 560        | -0.2379508  | 1639160     | 0.32606078  | 1729188     | 0.29938124   | experimental | Prestwick    | 274       |     | Prednisolone                        |            |
| 2095 H11 | X |        | 440    | 440        | -0.27934391 | 435    | 440        | -0.27934391 | 4786504     | 0.0308453   | 4567264     | -0.34497899  | experimental | Prestwick    | 195       |     | Hydrastinine hydrochloride          |            |
| 2095 H12 | X |        | 355    | 360        | -0.70567019 | 515    | 520        | -0.41653204 | 1507437     | 0.0453012   | 1716701     | -0.27336168  | experimental | Prestwick    | 275       |     | Fenofibrate                         |            |
| 2095 H13 | X |        | 514    | 520        | 0.1416533   | 435    | 440        | -0.78285254 | 1755617     | 0.6169106   | 1802098     | 0.45130613   | experimental | Prestwick    | 196       |     | Pentoxifylline                      |            |
| 2095 H14 | X |        | 436    | 440        | -0.27401483 | 515    | 520        | -0.41653204 | 1566640     | 0.1714888   | 1673978     | 0.1843384    | experimental | Prestwick    | 276       |     | Bumetamide                          |            |
| 2095 H15 | X |        | 354    | 360        | -0.71099927 | 514    | 520        | -0.42111105 | 1763277     | 0.59060064  | 1752947     | 0.34888863   | experimental | Prestwick    | 197       |     | Metaraminol bitartrate              |            |
| 2095 H16 | X |        | 555    | 560        | 0.36014553  | 674    | 680        | 0.31152994  | 1248561     | -0.5064773  | 1546039     | -0.08225217  | experimental | Prestwick    | 277       |     | Labeltalol hydrochloride            |            |
| 2095 H17 | X |        | 595    | 600        | 0.57330867  | 594    | 600        | -0.05479056 | 1720249     | 0.49889707  | 1878595     | 0.61070537   | experimental | Prestwick    | 198       |     | Salbutamol                          |            |
| 2095 H18 | X |        | 434    | 440        | -0.29006206 | 432    | 440        | -0.29006206 | 1598626     | 0.24179646  | 1567385     | 0.18249538   | experimental | Prestwick    | 278       |     | Hexiprone                           |            |
| 2095 H19 | X |        | 474    | 480        | -0.07150984 | 472    | 480        | -0.61342937 | 8190585     | 1.879552    | 787257      | 0.42038147   | experimental | Prestwick    | 199       |     | Procaine hydrochloride              |            |
| 2095 H20 | X |        | 591    | 600        | 0.55199236  | 710    | 720        | 0.47637416  | 1501775     | 0.03323299  | 1651909     | 0.13835252   | experimental | Prestwick    | 279       |     | Methylprednisolone, 6-alpha         |            |
| 2095 H21 | X |        | 1512   | 1520       | 5.46007374  | 1429   | 1440       | 3.7686796   | 3801290     | 4.93450976  | 3475174     | 3.93754795 W | experimental | Prestwick    | 200       |     | Camptothecin (S, +)                 |            |
| 2095 H22 | X |        | 628    | 640        | 0.74916826  | 947    | 960        | 1.56159862  | 1505590     | 0.04136443  | 1475855     | -0.22849681  | experimental | Prestwick    | 280       |     | Quinidine hydrochloride monohydrate |            |
| 2095 H23 | E |        | 327    | 800        | -0.85488439 | 447    | 1080       | -0.72790446 | 87597       | -2.98100166 | 89304       | -3.11769735  | empty        |              |           |     |                                     |            |
| 2095 H24 | P | 160478 | 161240 | 852.602382 | 214786      | 215880 | 980.7317   | 1521065     | 0.07434845  | 1876777     | 0.60691715  | empty        |              |              |           |     |                                     |            |
| 2095 I01 | N |        | 437    | 440        | -0.26868575 | 357    | 360        | -1.14001502 | 1367281     | -0.25343282 | 1309159     | -0.57584658  | empty        |              |           |     |                                     |            |
| 2095 I02 | E |        | 117    | 120        | -1.9739909  | 116    | 120        | -2.24355551 | 86122       | -2.98414553 | 87599       | -3.12125011  | empty        |              |           |     |                                     |            |
| 2095 I03 | X |        | 356    | 360        | -0.70034111 | 955    | 960        | 1.59823067  | 1332229     | -0.32814403 | 1201875     | -0.79939767  | experimental | Prestwick    | 41        |     | Procaine hydrochloride              |            |
| 2095 I04 | X |        | 435    | 440        | -0.27934391 | 633    | 640        | 0.12379068  | 1473518     | -0.02699509 | 1345021     | -0.50111979  | experimental | Prestwick    | 121       |     | Bromocryptine mesylate              |            |
| 2095 I05 | X |        | 394    | 400        | -0.49783613 | 473    | 480        | -0.6088503  | 1485690     | -0.00105121 | 1582141     | -0.00720258  | experimental | Prestwick    | 42        |     | Moxisylyte hydrochloride            |            |
| 2095 I06 | X |        | 514    | 520        | 0.1416533   | 554    | 560        | -0.2379508  | 1405793     | -0.17134682 | 1598405     | 0.02686453   | experimental | Prestwick    | 122       |     | Metanephron hydrochloride DL        |            |
| 2095 I07 | X |        | 434    | 440        | -0.28467298 | 674    | 680        | 0.31152994  | 1503876     | 0.03771114  | 1587873     | 0.00491867   | experimental | Prestwick    | 43        |     | Metazole hydrochloride              |            |
| 2095 I08 | X |        | 436    | 440        | -0.27401483 | 753    | 760        | 0.67327143  | 1683304     | 0.42015104  | 2038631     | 0.94417749   | experimental | Prestwick    | 123       |     | Dehydrocholic acid                  |            |
| 2095 I09 | X |        | 392    | 400        | -0.50849428 | 432    | 440        | -0.6042713  | 1465896     | 0.38304695  | 1567268     | -0.03801663  | experimental | Prestwick    | 44        |     | Isoxicam                            |            |
| 2095 I10 | X |        | 1154   | 1160       | 3.55226361  | 874    | 880        | 1.22733117  | 1607490     | 0.2585581   | 1553037     | -0.06767022  | experimental | Prestwick    | 124       |     | Hesperadin                          |            |
| 2095 I11 | X |        | 353    | 360        | -0.71632835 | 394    | 400        | -0.97059179 | 1503051     | 0.03595271  | 1285460     | -0.62522894  | experimental | Prestwick    | 45        |     | Naproxen                            |            |
| 2095 I12 | X |        | 355    | 360        | -0.70567019 | 515    | 520        | -0.41653204 | 1168018     | -0.67814982 | 999830      | -1.22040528  | experimental | Prestwick    | 125       |     | Perphenazine                        |            |
| 2095 I13 | X |        | 716    | 720        | 1.21812718  | 315    | 320        | -1.33233328 | 1543492     | 0.12215024  | 1333431     | -0.52527024  | experimental | Prestwick    | 46        |     | Naphazoline hydrochloride           |            |
| 2095 I14 | X |        | 114    | 120        | -1.98997813 | 235    | 240        | -1.69865377 | 654263      | -1.77318744 | 734465      | -1.7733548   | experimental | Prestwick    | 126       |     | Mefloquine hydrochloride            |            |
| 2095 I15 | X |        | 516    | 520        | 0.15231146  | 394    | 400        | -0.97059179 | 1615603     | 0.27585047  | 1378525     | -0.43130644  | experimental | Prestwick    | 47        |     | Ticlopidine hydrochloride           |            |
| 2095 I16 | X |        | 395    | 400        | -0.49250705 | 474    | 480        | -0.49250705 | 1149613     | -0.71737896 | 1065325     | -1.08705838  | experimental | Prestwick    | 127       |     | Eticoxacin                          |            |
| 2095 I17 | X |        | 314    | 320        | -0.92416242 | 352    | 360        | -1.16291005 | 1151055     | -0.7        |             |              |              |              |           |     |                                     |            |

|          |   |        |        |             |        |        |             |         |             |         |              |              |           |     |                                           |
|----------|---|--------|--------|-------------|--------|--------|-------------|---------|-------------|---------|--------------|--------------|-----------|-----|-------------------------------------------|
| 2095 J13 | X | 515    | 520    | 0.14698238  | 675    | 680    | 0.31610894  | 1571873 | 0.18264262  | 1653615 | 0.14190737   | experimental | Prestwick | 206 | Meclofenamic acid sodium salt monohydrate |
| 2095 J14 | X | 395    | 400    | -0.49250705 | 394    | 400    | -0.97059179 | 1179667 | -0.65332068 | 1373840 | -0.44106872  | experimental | Prestwick | 286 | Perhexiline maleate                       |
| 2095 J15 | X | 435    | 440    | -0.27934391 | 793    | 800    | 0.85643167  | 1637988 | 0.32356274  | 1741619 | 0.32528411   | experimental | Prestwick | 207 | Kawain                                    |
| 2095 J16 | X | 355    | 360    | -0.70567019 | 593    | 600    | -0.05936856 | 1214749 | -0.57854552 | 1272326 | -0.79864545  | experimental | Prestwick | 208 | Oxybutynin chloride                       |
| 2095 J17 | X | 435    | 440    | -0.27934391 | 672    | 680    | 0.30237193  | 1702915 | 0.4702915   | 1870348 | 0.59352083   | experimental | Prestwick | 207 | Trimethoprim                              |
| 2095 I18 | X | 514    | 520    | 0.1416533   | 631    | 640    | 0.11463267  | 1351614 | -0.28682608 | 1214907 | -0.77224248  | experimental | Prestwick | 288 | Sipiperone                                |
| 2095 I19 | X | 515    | 520    | 0.14698238  | 472    | 480    | -0.61342931 | 1663306 | 0.37752652  | 1701978 | 0.2426829    | experimental | Prestwick | 209 | Meclofenamic acid sodium salt monohydrate |
| 2095 J20 | X | 391    | 400    | -0.51382336 | 750    | 760    | 0.65953441  | 1385832 | -0.21389248 | 1549264 | -0.07553214  | experimental | Prestwick | 289 | Pyrimilamine maleate                      |
| 2095 J21 | X | 1434   | 1440   | 0.50440561  | 1351   | 1360   | 3.41151712  | 1533326 | 0.10048203  | 1674561 | 0.18555322   | experimental | Prestwick | 210 | Fenbendazole                              |
| 2095 J22 | X | 628    | 640    | 0.74916826  | 669    | 680    | 0.28863491  | 1421338 | -0.1382136  | 1419370 | -0.34619641  | experimental | Prestwick | 290 | Sulfipyrizone                             |
| 2095 J23 | E | 392    | 392    | 880         | 880    | 880    | -1.58875762 | 86288   | -2.98379171 | 86865   | -3.11898718  | empty        |           |     |                                           |
| 2095 J24 | P | 165758 | 164880 | 880.739917  | 141945 | 142880 | 647.169416  | 1584785 | 0.21016577  | 1508590 | -0.16028585  | empty        |           |     |                                           |
| 2095 K01 | N | 517    | 520    | 0.15764054  | 397    | 400    | -0.95685477 | 1247212 | -0.50935261 | 1354072 | -0.48225993  | empty        |           |     |                                           |
| 2095 K02 | E | 77     | 80     | -2.18715404 | 157    | 160    | -2.05581625 | 84411   | -2.98779242 | 90100   | -3.1160387   | empty        |           |     |                                           |
| 2095 K03 | X | 355    | 360    | -0.70567019 | 475    | 480    | -0.59969229 | 1378273 | -0.23000403 | 1296098 | -0.6030622   | experimental | Prestwick | 51  | Trichlorfon                               |
| 2095 K04 | X | 516    | 520    | 0.15231146  | 394    | 400    | -0.97059179 | 1422130 | -0.1365255  | 1357268 | -0.47560032  | experimental | Prestwick | 131 | Glipizide                                 |
| 2095 K05 | X | 434    | 440    | -0.28467298 | 554    | 560    | -0.2379508  | 1498975 | 0.02726494  | 1663630 | 0.10589006   | experimental | Prestwick | 52  | Carbamazepine                             |
| 2095 K06 | X | 315    | 320    | -0.91883334 | 354    | 360    | -1.15375204 | 1408881 | -0.16476494 | 1569343 | -0.03369288  | experimental | Prestwick | 132 | Loxapine succinate                        |
| 2095 K07 | X | 275    | 280    | -1.13199648 | 715    | 720    | 0.49926919  | 1220661 | -0.56594445 | 1508590 | -0.16028585  | experimental | Prestwick | 53  | Triflupromazine hydrochloride             |
| 2095 K08 | X | 396    | 400    | -0.48717797 | 434    | 440    | -0.78743154 | 1510918 | 0.05272074  | 1798969 | 0.44478614   | experimental | Prestwick | 133 | Hydroxyzine dihydrochloride               |
| 2095 K09 | X | 395    | 400    | -0.49250705 | 393    | 400    | -0.9751708  | 1503948 | 0.03786461  | 1524419 | -0.12730246  | experimental | Prestwick | 54  | Mefenamic acid                            |
| 2095 K10 | X | 516    | 520    | 0.15231146  | 635    | 640    | 0.1329487   | 1549385 | 0.13471082  | 1476417 | -0.22732575  | experimental | Prestwick | 134 | Diltiazem hydrochloride                   |
| 2095 K11 | X | 275    | 280    | -1.13199648 | 354    | 360    | -1.15375204 | 1460369 | -0.05502139 | 1372025 | -0.44485069  | experimental | Prestwick | 55  | Acetohexamide                             |
| 2095 K12 | X | 476    | 480    | -0.06085168 | 435    | 440    | -0.7825254  | 1499843 | 0.02911505  | 1475439 | -0.22936364  | experimental | Prestwick | 135 | Methotrexate                              |
| 2095 K13 | X | 434    | 440    | -0.28467298 | 474    | 480    | -0.6042713  | 1603556 | 0.25017302  | 1533296 | -0.10880517  | experimental | Prestwick | 56  | Sulpiride                                 |
| 2095 K14 | X | 375    | 380    | -0.36014553 | 474    | 480    | -0.6042713  | 874171  | -1.30446688 | 1470325 | -1.03162856  | experimental | Prestwick | 296 | Acetaminophen                             |
| 2095 K15 | X | 475    | 480    | -0.06618076 | 873    | 880    | 1.22275217  | 1539587 | -1.13826987 | 1744499 | -0.33128526  | experimental | Prestwick | 57  | Benoxinate hydrochloride                  |
| 2095 K16 | X | 395    | 400    | -0.49250705 | 391    | 400    | -0.98432881 | 1517456 | 0.06665609  | 1720147 | -0.28054222  | experimental | Prestwick | 137 | Clindamycin hydrochloride                 |
| 2095 K17 | X | 395    | 400    | -0.49250705 | 1072   | 1080   | 2.13397439  | 1602425 | 0.24776236  | 1781210 | 0.40778114   | experimental | Prestwick | 58  | Oxethazaine                               |
| 2095 K18 | X | 395    | 400    | -0.49250705 | 752    | 760    | 0.66869242  | 1410960 | -0.16033368 | 1660645 | -0.15655601  | experimental | Prestwick | 138 | Terfenadine                               |
| 2095 K19 | X | 515    | 520    | 0.14698238  | 673    | 680    | 0.30695093  | 1613297 | 0.27093537  | 1775523 | 0.39593096   | experimental | Prestwick | 59  | Pheniramine maleate                       |
| 2095 K20 | X | 474    | 480    | -0.07150984 | 832    | 840    | 1.03501291  | 1775542 | 0.61675075  | 1796196 | 0.43900795   | experimental | Prestwick | 139 | Cefotaxime sodium salt                    |
| 2095 K21 | X | 591    | 600    | 0.55192326  | 789    | 800    | 0.83811565  | 1618691 | 0.28243235  | 1741498 | 0.32503198   | experimental | Prestwick | 60  | Tolazoline hydrochloride                  |
| 2095 K22 | X | 375    | 380    | -0.49250705 | 409    | 416    | -0.41530309 | 1663592 | -0.37818173 | 1378181 | -0.63149865  | experimental | Prestwick | 140 | Tetracycline hydrochloride                |
| 2095 K23 | E | 361    | 720    | -0.67369572 | 496    | 920    | -0.62716633 | 88673   | -2.97870823 | 89500   | -3.11728894  | empty        |           |     |                                           |
| 2095 K24 | P | 120860 | 121720 | 641.474946  | 152325 | 153280 | 694.722395  | 1378167 | -0.23022997 | 1581283 | -0.00881313  | empty        |           |     |                                           |
| 2095 L01 | N | 477    | 480    | -0.0555226  | 357    | 360    | -1.14001502 | 1214753 | -0.578537   | 1205716 | -0.79139406  | empty        |           |     |                                           |
| 2095 L02 | E | 76     | 80     | -2.19248312 | 75     | 80     | -2.43129476 | 80070   | -2.997045   | 81335   | -3.13430261  | empty        |           |     |                                           |
| 2095 L03 | X | 637    | 640    | 0.79712997  | 916    | 920    | 1.41964943  | 1424463 | -0.13155285 | 1597612 | 0.02521213   | experimental | Prestwick | 211 | Piroxicam                                 |
| 2095 L04 | X | 275    | 280    | -1.13199648 | 394    | 400    | -0.97059179 | 1329125 | -0.33476002 | 1266637 | -0.66467503  | experimental | Prestwick | 291 | Dantrolene sodium salt                    |
| 2095 L05 | X | 440    | 440    | -0.27401483 | 476    | 480    | -0.27401483 | 1602020 | 0.24689913  | 1122327 | -0.13123367  | experimental | Prestwick | 292 | Glipizide tartrate                        |
| 2095 L06 | X | 435    | 440    | -0.27934391 | 476    | 480    | -0.59511328 | 1588099 | 0.21722736  | 1553499 | -0.06670753  | experimental | Prestwick | 212 | Trazodone hydrochloride                   |
| 2095 L07 | X | 475    | 480    | -0.06618076 | 353    | 360    | -1.15833104 | 1526803 | 0.08657865  | 1492819 | -0.19314838  | experimental | Prestwick | 213 | Fenfluramine hydrochloride                |
| 2095 L08 | X | 475    | 480    | -0.06618076 | 474    | 480    | -0.6042713  | 1399913 | -0.18387969 | 1605319 | 0.04127145   | experimental | Prestwick | 293 | Glaucine hydrochloride                    |
| 2095 L09 | X | 436    | 440    | -0.27401483 | 315    | 320    | -1.33233328 | 1595172 | 0.23230303  | 1766551 | 0.18990822   | experimental | Prestwick | 214 | Gemfibrozil                               |
| 2095 L10 | X | 235    | 240    | -1.34515962 | 355    | 360    | -1.14917303 | 1132260 | -0.75436582 | 1140484 | -0.92732006  | experimental | Prestwick | 294 | Pimethixene maleate                       |
| 2095 L11 | X | 395    | 400    | -0.49250705 | 514    | 520    | -0.42111105 | 1726651 | 0.51254255  | 1776214 | 0.39737082   | experimental | Prestwick | 215 | Mefenamic acid hydrochloride              |
| 2095 L12 | X | 375    | 380    | -0.49250705 | 409    | 416    | -0.41530309 | 1305415 | -0.38259644 | 1470323 | -2.40002462  | experimental | Prestwick | 295 | Tergipride mesylate                       |
| 2095 L13 | X | 475    | 480    | -0.06618076 | 435    | 440    | -0.7825254  | 1578497 | 0.1916128   | 148438  | -0.19363185  | experimental | Prestwick | 216 | Tripelennamine hydrochloride              |
| 2095 L14 | X | 394    | 400    | -0.49783613 | 474    | 480    | -0.6042713  | 1426756 | -0.12666546 | 1525629 | -0.12478114  | experimental | Prestwick | 296 | Acemetacin                                |
| 2095 L15 | X | 475    | 480    | -0.06618076 | 633    | 640    | 0.12379068  | 1603945 | 0.25100215  | 1856258 | 0.56416105   | experimental | Prestwick | 217 | Mefenamic acid                            |
| 2095 L16 | X | 394    | 400    | -0.49783613 | 433    | 440    | -0.79201055 | 1413552 | -0.15480899 | 1531265 | -0.11303723  | experimental | Prestwick | 297 | Benzydamine hydrochloride                 |
| 2095 L17 | X | 556    | 560    | 0.36547461  | 912    | 920    | 1.40133341  | 1606943 | 0.2573922   | 1557115 | -0.05917276  | experimental | Prestwick | 218 | Fenbufen                                  |
| 2095 L18 | X | 275    | 280    | -1.13199648 | 472    | 480    | -0.61342931 | 1486411 | 0.00048555  | 1539683 | -0.09549637  | experimental | Prestwick | 298 | Fluprednide hydrochloride                 |
| 2095 L19 | X | 435    | 440    | -0.27934391 | 474    | 480    | -0.6042713  | 1529174 | 0.09163323  | 1265942 | -0.66589922  | experimental | Prestwick | 219 | Ketoprofen                                |
| 2095 L20 | X | 395    | 400    | -0.49250705 | 352    | 360    | -1.16291005 | 1445961 | -0.08573117 | 1328709 | -0.53510962  | experimental | Prestwick | 299 | Mifepristone                              |
| 2095 L21 | X | 353    | 360    | -0.71632835 | 790    | 800    | 0.84269465  | 1433377 | -0.1125532  | 1639581 | 0.11266428   | experimental | Prestwick | 220 | Indanaprine                               |
| 2095 L22 | X | 553    | 560    | 0.34948737  | 630    | 640    | 0.11005367  | 1193291 | -0.62428195 | 1366140 | -0.45711346  | experimental | Prestwick | 300 | Diperodon hydrochloride                   |
| 2095 L23 | E | 299    | 680    | -1.00409859 | 455    | 1000   | -0.69127241 | 87450   | -2.98131498 | 87964   | -3.12048955  | empty        |           |     |                                           |
| 2095 L24 | P | 128870 | 129680 | 684.160866  | 185364 | 186160 | 846.00818   | 1357346 | -0.27460867 | 1512442 | -0.15225931  | empty        |           |     |                                           |
| 2095 M01 | N | 517    | 520    | 0.15764054  | 557    | 560    | -0.22421378 | 1242082 | -0.52028689 | 1366723 | -0.45589864  | empty        |           |     |                                           |
| 2095 M02 | E | 77     | 80     | -2.18715404 | 117    | 120    | -2.2389765  | 83241   | -2.99028621 | 86040   | -3.124449865 | empty        |           |     |                                           |
| 2095 M03 | X | 436    | 440    | -0.27401483 | 314    | 320    | -1.33591228 | 1185767 | -0.6403189  | 1023425 | -1.17123363  | experimental | Prestwick | 61  | Morantel tartrate                         |
| 2095 M04 | X | 196    | 200    | -1.55299369 | 355    | 360    | -1.14917303 | 1190119 | -0.63104287 | 1100036 | -0.101160285 | experimental | Prestwick | 141 | Verapamil hydrochloride                   |
| 2095 M05 | X | 314    | 320    | -0.92416242 | 315    | 320    | -1.33233328 | 1307067 | -0.38177531 | 1307054 | -0.58023284  | experimental | Prestwick | 62  | Homatropine hydrobromide (R,S)            |
| 2095 M06 | X | 396    | 400    | -0.48717797 | 354    | 360    | -1.15375204 | 2003353 | 1.10231608  | 2160931 | 1.1990179    | experimental | Prestwick | 142 | Dipyridamole                              |
| 2095 M07 | X | 395    | 400    | -0.49250705 | 714    | 720    | 0.49469018  | 1321538 | -0.35093125 | 1469322 | -0.24210983  | experimental | Prestwick | 63  | Nifedipine                                |
| 2095 M08 | X | 516    | 520    | 0.15231146  | 833    | 840    | 1.03959192  | 1299920 | -0.3970087  | 1541847 | -0.09098718  | experimental | Prestwick | 143 | Chlorhexidine                             |
| 2095 M09 | X | 275    | 280    | -1.13199648 | 554    | 560    | -0.2379508  | 948817  | -1.14536345 | 990245  | -1.24037785  | experimental | Prestwick | 64  | Chlorpromazine hydrochloride              |
| 2095 M10 | X | 434    | 440    | -0.28467298 | 352    | 360    | -1.16291005 | 1183080 | -0.64646608 | 1267540 | -0.66256492  | experimental | Prestwick | 144 | Isoperamide hydrochloride                 |
| 2095 M11 | X | 875    | 880    | -0.06545068 | 1035   | 1040   | 0.96455117  | 1022858 | -0.98754955 | 1459513 | -1.2438067   | experimental | Prestwick | 65  | Diphenhydramine hydrochloride             |
| 2095 M12 | X | 474    | 480    | -0.07150984 | 353    | 360    | -1.15833104 | 1522790 | -0.07802519 | 1938554 | -0.38957137  | experimental | Prestwick | 145 | Chlorzacycline hydrochloride              |
| 2095 M13 | X | 435    | 440    | -0.27934391 | 435    | 440    | -0.7825254  | 1269847 | -0.46110748 | 1186211 | -0.83203725  | experimental | Prestwick | 66  | Minaprine dihydrochloride                 |
| 2095 M14 | X | 434    | 440    | -0.28467298 | 515    | 520    | -0.41653204 | 944437  | -1.15469916 | 1101158 | -1.0092649   | experimental | Prestwick | 146 | Tamoxifen citrate                         |
| 2095 M   |   |        |        |             |        |        |             |         |             |         |              |              |           |     |                                           |



|          |   |        |        |             |        |        |             |         |             |         |             |              |           |          |                                      |
|----------|---|--------|--------|-------------|--------|--------|-------------|---------|-------------|---------|-------------|--------------|-----------|----------|--------------------------------------|
| 2095 N07 | X | 316    | 320    | -0.91350426 | 474    | 480    | -0.6042713  | 1384246 | -0.2127295  | 1580976 | -0.00945283 | experimental | Prestwick | 223      | Xylometazoline hydrochloride         |
| 2095 N08 | X | 355    | 360    | -0.70567019 | 593    | 600    | -0.05936956 | 1377569 | -0.23150457 | 1400115 | -0.38631866 | experimental | Prestwick | 303      | Telenzepine dihydrochloride          |
| 2095 N09 | X | 276    | 280    | -1.1266674  | 513    | 520    | -0.42569006 | 1480425 | -0.01227324 | 1708154 | 0.25555202  | experimental | Prestwick | 224      | Oxymetazoline hydrochloride          |
| 2095 N10 | X | 516    | 520    | 0.15231146  | 715    | 720    | 0.4926919   | 929902  | -1.1866796  | 1139891 | -0.9285571  | experimental | Prestwick | 304      | Econazole nitrate                    |
| 2095 N11 | X | 274    | 280    | -1.13732556 | 592    | 600    | -0.0639487  | 1378877 | -0.23297952 | 1642191 | 0.11810282  | experimental | Prestwick | 225      | Nifenazone                           |
| 2095 N12 | X | 355    | 360    | -0.70567019 | 554    | 560    | -0.2379508  | 1273861 | -0.45255188 | 1382727 | -0.42255059 | experimental | Prestwick | 305      | Bupivacaine hydrochloride            |
| 2095 N13 | X | 354    | 360    | -0.71099927 | 475    | 480    | -0.59969229 | 1388896 | -0.20736175 | 1576554 | -0.01866709 | experimental | Prestwick | 226      | Griseofulvin                         |
| 2095 N14 | X | 796    | 800    | 1.64445347  | 395    | 400    | -0.96601278 | 1106341 | -1.00144014 | 1280633 | -0.63528712 | experimental | Prestwick | 306      | Clemastine fumarate                  |
| 2095 N15 | X | 314    | 320    | -0.92416242 | 354    | 360    | -1.15375204 | 1353211 | -0.28342217 | 1525690 | -0.12465403 | experimental | Prestwick | 227      | Clemizole hydrochloride              |
| 2095 N16 | X | 475    | 480    | -0.06618076 | 514    | 520    | -0.42111105 | 1246048 | -0.5118336  | 1431688 | -0.320529   | experimental | Prestwick | 307      | Oxytetracycline dihydrate            |
| 2095 N17 | X | 435    | 440    | -0.27934391 | 554    | 560    | -0.2379508  | 1441888 | -0.09441252 | 1531691 | -0.11214956 | experimental | Prestwick | 228      | Tropicamide                          |
| 2095 N18 | X | 395    | 400    | -0.49250705 | 432    | 440    | -0.79589556 | 1174318 | -0.57927215 | 1304253 | -0.5835861  | experimental | Prestwick | 308      | Pimozide                             |
| 2095 N19 | X | 395    | 400    | -0.49250705 | 873    | 880    | 1.22275217  | 1435450 | -0.10813473 | 1716671 | 0.27329917  | experimental | Prestwick | 229      | Nefopam hydrochloride                |
| 2095 N20 | X | 475    | 480    | -0.06618076 | 551    | 560    | -0.25168782 | 793305  | -1.47682785 | 894336  | -1.4402265  | experimental | Prestwick | 309      | Amodiaquin dihydrochloride dihydrate |
| 2095 N21 | X | 513    | 520    | 0.13632423  | 749    | 760    | 0.6549554   | 1256857 | -0.48879488 | 1416922 | -0.35129738 | experimental | Prestwick | 230      | Phentolamine hydrochloride           |
| 2095 N22 | X | 673    | 680    | 0.9889768   | 911    | 920    | 1.3967544   | 1214074 | -0.57998425 | 1338074 | -0.51559547 | experimental | Prestwick | 310      | Mebeverine hydrochloride             |
| 2095 N23 | E | 291    | 720    | -1.04673122 | 329    | 960    | -1.26822719 | 86509   | -2.98332066 | 84937   | -3.126797   | empty        |           |          |                                      |
| 2095 N24 | P | 144718 | 145680 | 768.616103  | 214266 | 215160 | 978.350616  | 1363524 | -0.26144063 | 1558051 | -0.05722238 | empty        |           |          |                                      |
| 2095 O01 | N | 518    | 520    | 0.16299662  | 636    | 640    | 0.1375277   | 1107318 | -0.80752818 | 1233356 | -0.73379971 | empty        |           |          |                                      |
| 2095 O02 | E | 76     | 80     | -2.19248312 | 76     | 80     | -2.42671575 | 82640   | -2.9915672  | 84301   | -3.12812226 | empty        |           |          |                                      |
| 2095 O03 | X | 596    | 600    | 0.57863775  | 515    | 520    | -0.41653204 | 1133972 | -0.7507168  | 953870  | -1.3161736  | experimental | Prestwick | 71       | Todralazine hydrochloride            |
| 2095 O04 | X | 393    | 400    | -0.50316521 | 594    | 600    | -0.05479056 | 1154151 | -0.70770649 | 1027446 | -1.16286094 | experimental | Prestwick | 151      | Erythromycin                         |
| 2095 O05 | X | 634    | 640    | 0.78114274  | 473    | 480    | -0.6088503  | 955727  | -1.13063521 | 1004993 | -1.20964698 | experimental | Prestwick | 72       | Imipramine hydrochloride             |
| 2095 O06 | X | 235    | 240    | -1.34515962 | 474    | 480    | -0.6042713  | 1143558 | -0.73028482 | 1433055 | -0.31768054 | experimental | Prestwick | 152      | Oleandomycin phosphate               |
| 2095 O07 | X | 395    | 400    | -0.49250705 | 514    | 520    | -0.42111105 | 1240716 | -0.52319844 | 1438321 | -0.3067076  | experimental | Prestwick | 73       | Sulindac                             |
| 2095 O08 | X | 435    | 440    | -0.27934391 | 554    | 560    | -0.2379508  | 1217858 | -0.5220298  | 1602316 | -0.03833393 | experimental | Prestwick | 153_2009 | Idanosone                            |
| 2095 O09 | X | 355    | 360    | -0.70567019 | 474    | 480    | -0.6042713  | 1046526 | -0.37010265 | 133580  | -0.96254346 | experimental | Prestwick | 74       | Amtryptiline hydrochloride           |
| 2095 O10 | X | 355    | 360    | -0.70567019 | 353    | 360    | -1.15833104 | 1203650 | -0.60202037 | 1094986 | -1.02212569 | experimental | Prestwick | 154      | Josamycin                            |
| 2095 O11 | X | 435    | 440    | -0.27934391 | 513    | 520    | -0.42569006 | 1269756 | -0.46130144 | 1129648 | -0.94989938 | experimental | Prestwick | 75       | Adiphenine hydrochloride             |
| 2095 O12 | X | 595    | 600    | 0.57330867  | 554    | 560    | -0.2379508  | 1059736 | -0.90894633 | 1004173 | -1.21135564 | experimental | Prestwick | 155      | Paclitaxel                           |
| 2095 O13 | X | 516    | 520    | 0.15231146  | 394    | 400    | -0.97059179 | 1030630 | -0.97098041 | 1019958 | -1.17846393 | experimental | Prestwick | 76       | Dibucaine                            |
| 2095 O14 | X | 114    | 120    | -1.98997813 | 235    | 240    | -1.69865377 | 558059  | -1.97824043 | 640293  | -1.969584   | experimental | Prestwick | 156      | Ivermectin                           |
| 2095 O15 | X | 357    | 360    | -0.69501204 | 755    | 760    | 0.68242944  | 1341665 | -0.30803177 | 1230763 | -0.73920283 | experimental | Prestwick | 77       | Prednisone                           |
| 2095 O16 | X | 516    | 520    | -0.41789995 | 529    | 530    | -0.242490   | 80772   | -0.99154873 | 1233769 | -0.12602602 | experimental | Prestwick | 157      | Gallamine triethiodide               |
| 2095 O17 | X | 555    | 560    | 0.36014553  | 473    | 480    | -0.6088503  | 868477  | -1.31660329 | 1016098 | -1.18650713 | experimental | Prestwick | 78       | Thioridazine hydrochloride           |
| 2095 O18 | X | 474    | 480    | -0.07150984 | 552    | 560    | -0.24710882 | 1400754 | -0.18208715 | 1161671 | 0.06500933  | experimental | Prestwick | 158      | Neomycin sulfate                     |
| 2095 O19 | X | 395    | 400    | -0.49250705 | 752    | 760    | 0.66869242  | 1309383 | -0.37683889 | 1693540 | 0.22510037  | experimental | Prestwick | 79       | Diphenamil methylsulfate             |
| 2095 O20 | X | 555    | 560    | 0.36014553  | 872    | 880    | 1.21817316  | 1344722 | -0.30151596 | 1548211 | -0.07772631 | experimental | Prestwick | 159      | Dihydrostreptomycin sulfate          |
| 2095 O21 | X | 394    | 400    | -0.49783613 | 631    | 640    | 0.11463267  | 1254043 | -0.49479275 | 1393639 | -0.39981291 | experimental | Prestwick | 80       | Trimethobenzamide hydrochloride      |
| 2095 O22 | X | 592    | 600    | 0.55732143  | 750    | 760    | 0.65953441  | 1252028 | -0.4990786  | 1401010 | -0.38445372 | experimental | Prestwick | 160      | Gentamicin sulfate                   |
| 2095 O23 | E | 519    | 520    | -0.41789995 | 529    | 530    | -0.242490   | 80772   | -0.99154873 | 1233769 | -0.12602602 | empty        |           |          |                                      |
| 2095 O24 | P | 173298 | 174160 | 920.921117  | 185869 | 187200 | 848.320578  | 1177515 | -0.65790754 | 1308817 | -0.57505322 | empty        |           |          |                                      |
| 2095 P01 | N | 358    | 360    | -0.68968296 | 718    | 720    | 0.51300621  | 844747  | -1.36718235 | 952670  | -1.31867408 | empty        |           |          |                                      |
| 2095 P02 | E | 117    | 120    | -1.9739909  | 116    | 120    | -2.24355551 | 74887   | -3.00809225 | 73512   | -3.15060364 | empty        |           |          |                                      |
| 2095 P03 | X | 556    | 560    | 0.36547461  | 677    | 680    | 0.32526696  | 1164303 | -0.68606811 | 1225553 | -0.75005907 | experimental | Prestwick | 231      | Etodolac                             |
| 2095 P04 | X | 596    | 600    | 0.57863775  | 554    | 560    | -0.2379508  | 994177  | -1.04868137 | 1066786 | -1.08088693 | experimental | Prestwick | 311      | Ifenprodil tartrate                  |
| 2095 P05 | X | 435    | 440    | -0.27934391 | 755    | 760    | 0.68242944  | 1138129 | -0.74185641 | 1239870 | -0.72022628 | experimental | Prestwick | 232      | Scopolamin-N-oxide dihydrobromide    |
| 2095 P06 | X | 595    | 600    | 0.36547461  | 795    | 800    | 0.86558968  | 917527  | -1.21205619 | 1063372 | -1.08365764 | experimental | Prestwick | 312      | Alfuzosin hydrochloride              |
| 2095 P07 | X | 635    | 640    | 0.79180089  | 635    | 640    | 0.1394887   | 1214413 | -0.297555   | 297555  | -6.00033243 | experimental | Prestwick | 313      | Hydrocortisone (L)                   |
| 2095 P08 | X | 436    | 440    | -0.27401483 | 355    | 360    | -1.14917303 | 908528  | -1.23123701 | 988327  | -1.24437445 | experimental | Prestwick | 313      | Trifluoperazine dihydrochloride      |
| 2095 P09 | X | 437    | 440    | -0.26868575 | 515    | 520    | -0.41653204 | 1214927 | -0.57816613 | 1238264 | -0.72357275 | experimental | Prestwick | 234      | Chlorthalidone                       |
| 2095 P10 | X | 396    | 400    | -0.48717797 | 715    | 720    | 0.49926919  | 1105863 | -0.81062943 | 1237564 | -0.72503137 | experimental | Prestwick | 314      | Enalapril maleate                    |
| 2095 P11 | X | 477    | 480    | -0.0555226  | 755    | 760    | 0.68242944  | 1218709 | -0.57010250 | 1321882 | -0.54933526 | experimental | Prestwick | 235      | Metampicillin sodium salt            |
| 2095 P12 | X | 356    | 360    | -0.70034111 | 474    | 480    | -0.6042713  | 1004307 | -1.02708988 | 1130875 | -0.94734264 | experimental | Prestwick | 315      | Minocycline hydrochloride            |
| 2095 P13 | X | 397    | 400    | -0.48184889 | 797    | 800    | 0.8747477   | 1207911 | -0.59312031 | 1267407 | -0.66284656 | experimental | Prestwick | 236      | Dilazep dihydrochloride              |
| 2095 P14 | X | 317    | 320    | -0.90817518 | 316    | 320    | -1.32775427 | 1138281 | -0.74153243 | 1323769 | -0.54503216 | experimental | Prestwick | 316      | Gilbenclamide                        |
| 2095 P15 | X | 357    | 360    | -0.69501204 | 435    | 440    | -0.78285254 | 1207912 | -0.59311817 | 1354519 | -0.4813285  | experimental | Prestwick | 237      | Oxofloxacin                          |
| 2095 P16 | X | 277    | 280    | -1.12133832 | 635    | 640    | 0.1329487   | 1086145 | -0.85265715 | 1163829 | -0.87867534 | experimental | Prestwick | 317      | Guaethidine sulfate                  |
| 2095 P17 | X | 475    | 480    | -0.06618076 | 634    | 640    | 0.12836969  | 1201994 | -0.60573203 | 1402637 | -0.38106349 | experimental | Prestwick | 238      | Lomefloxacin hydrochloride           |
| 2095 P18 | X | 716    | 720    | 1.21812718  | 1115   | 1120   | 2.33087166  | 853891  | -1.34769247 | 869426  | -1.49213226 | experimental | Prestwick | 318      | Quinacrine dihydrochloride dihydrate |
| 2095 P19 | X | 396    | 400    | -0.48717797 | 393    | 400    | -0.9751708  | 1151878 | -0.71255125 | 1219745 | -0.76216139 | experimental | Prestwick | 239      | Orphenadrine hydrochloride           |
| 2095 P20 | X | 396    | 400    | -0.48717797 | 674    | 680    | 0.31152994  | 969890  | -1.1002558  | 1130952 | -0.94718219 | experimental | Prestwick | 319      | Clofium tosylate                     |
| 2095 P21 | X | 516    | 520    | 0.15231146  | 674    | 680    | 0.31152994  | 1146662 | -0.72366883 | 1292740 | -0.61005938 | experimental | Prestwick | 240      | Progildium                           |
| 2095 P22 | X | 634    | 640    | 0.78114274  | 912    | 920    | 1.40133341  | 856392  | -1.34236174 | 1033096 | -1.15108786 | experimental | Prestwick | 320      | Fluphenazine dihydrochloride         |
| 2095 P23 | E | 477    | 920    | -0.0555226  | 649    | 1360   | 0.19705478  | 76802   | -3.00401054 | 78657   | -3.13988284 | empty        |           |          |                                      |
| 2095 P24 | P | 150773 | 151280 | 800.883674  | 242934 | 243480 | 1109.62157  | 947393  | -1.14839862 | 1212300 | -0.77767477 | empty        |           |          |                                      |
| 2096 A01 | N | 718    | 720    | 0.63932902  | 678    | 680    | 0.02327644  | 1094118 | -0.68641359 | 1016750 | -0.78909314 | empty        |           |          |                                      |
| 2096 A02 | X | 316    | 320    | -0.93061877 | 436    | 440    | -1.7004483  | 1297618 | -0.37183014 | 1279028 | -0.39240175 | experimental | Prestwick | 321      | Streptomycin sulfate                 |
| 2096 A03 | X | 876    | 880    | 1.25637317  | 595    | 600    | -0.04302796 | 1540362 | 0.00341923  | 1449281 | -1.13489674 | experimental | Prestwick | 401      | Testosterone propionate              |
| 2096 A04 | X | 554    | 560    | -0.00112457 | 674    | 680    | 0.12445573  | 1420083 | -0.18127913 | 1449689 | -0.08557641 | experimental | Prestwick | 322      | Alfuzosin hydrochloride              |
| 2096 A05 | X | 556    | 560    | 0.00666349  | 634    | 640    | -0.01187288 | 1485820 | -0.08089532 | 1504677 | -0.05111115 | experimental | Prestwick | 402      | Chlorpropamide                       |
| 2096 A06 | X | 475    | 480    | -0.30966927 | 833    | 840    | 0.14709791  | 1488441 | -0.07684361 | 1443546 | -0.14357084 | experimental | Prestwick | 323      | Chlorpropamide                       |
| 2096 A08 | X | 835    | 840    | 1.09625412  | 1075   | 1080   | 0.34041918  | 1553055 | 0.02304089  | 1671102 | 0.20060407  | experimental | Prestwick | 403      | Thiroxine (L)                        |
| 2096 A09 | X | 635    | 640    | 0.31518557  | 514    | 520    | -0.10773467 | 1498528 | -0.06125048 | 1583302 | 0.06780794  | experimental | Prestwick | 324      | Phenylpropanolamine hydrochloride</  |

|          |   |        |        |             |        |        |             |         |             |         |             |              |           |          |                                        |
|----------|---|--------|--------|-------------|--------|--------|-------------|---------|-------------|---------|-------------|--------------|-----------|----------|----------------------------------------|
| 2096 B04 | X | 513    | 520    | -0.16126625 | 354    | 360    | -0.23555038 | 1634277 | 0.1485991   | 1613332 | 0.11322785  | experimental | Prestwick | 561      | Tubocurarine chloride pentahydrate (+) |
| 2096 B05 | X | 515    | 520    | -0.15345556 | 353    | 360    | -0.23634923 | 1683749 | 0.22507612  | 1598073 | 0.09014885  | experimental | Prestwick | 482      | Cefotiam hydrochloride                 |
| 2096 B06 | X | 394    | 400    | -0.62600204 | 314    | 320    | -0.26750431 | 1446482 | -0.14170655 | 1420342 | -0.17866652 | experimental | Prestwick | 562      | Dihydroergocristine mesylate           |
| 2096 B07 | X | 475    | 480    | -0.30966927 | 554    | 560    | -0.07578074 | 1705616 | 0.25887954  | 1818452 | 0.42346665  | experimental | Prestwick | 475      | Azathioprine, 6                        |
| 2096 B08 | X | 473    | 480    | -0.31747996 | 432    | 440    | -0.17324022 | 3140887 | -0.34687129 | 1810152 | -0.25373265 | experimental | Prestwick | 563      | Nescapine                              |
| 2096 B09 | X | 314    | 320    | -0.93842946 | 514    | 520    | -0.10773467 | 1558877 | 0.03204091  | 1625931 | 0.13228364  | experimental | Prestwick | 484      | Benperidol                             |
| 2096 B10 | X | 392    | 400    | -0.63381272 | 592    | 600    | -0.04542451 | 1804860 | 0.41229733  | 1699667 | 0.24426193  | experimental | Prestwick | 564      | Syringopipone                          |
| 2096 B11 | X | 474    | 480    | -0.31357461 | 633    | 640    | -0.17244137 | 1697007 | 0.24557119  | 1941120 | 0.60900209  | experimental | Prestwick | 485      | Cefaclor                               |
| 2096 B12 | X | 434    | 440    | -0.46978833 | 474    | 480    | 0.02008105  | 1716271 | 0.27535073  | 1872979 | 0.50593989  | experimental | Prestwick | 565      | Atropine sulfate monohydrate           |
| 2096 B13 | X | 590    | 600    | 0.13944514  | 514    | 520    | -0.10773467 | 1725060 | 0.28893733  | 1753840 | 0.32574401  | experimental | Prestwick | 486      | Colistin sulfate                       |
| 2096 B14 | X | 594    | 600    | 0.15506652  | 473    | 480    | -0.14048744 | 1688471 | 0.22928396  | 1720040 | 0.27462203  | experimental | Prestwick | 566      | Eserine sulfate, physostigmine sulfate |
| 2096 B15 | X | 753    | 760    | 0.77601601  | 952    | 960    | 0.24215685  | 1258576 | -0.43218379 | 1266418 | -0.41138343 | experimental | Prestwick | 487      | Daunorubicin hydrochloride             |
| 2096 B16 | X | 592    | 600    | 0.14725583  | 392    | 400    | -0.20519415 | 1862474 | 0.50136077  | 1552575 | 0.02541754  | experimental | Prestwick | 567      | Acotinine                              |
| 2096 B17 | X | 552    | 560    | -0.00895788 | 591    | 600    | -0.04622335 | 1619222 | 0.12532611  | 1301696 | -0.35811675 | experimental | Prestwick | 488      | Dosulepin hydrochloride                |
| 2096 B18 | X | 434    | 440    | -0.46978833 | 992    | 1000   | 0.27411478  | 1551686 | 0.0209246   | 1398404 | -0.21184741 | experimental | Prestwick | 568      | Rescinamin                             |
| 2096 B19 | X | 474    | 480    | -0.31357461 | 712    | 720    | 0.05043728  | 1685404 | 0.22763452  | 1840479 | 0.45678415  | experimental | Prestwick | 489      | Ceftazidime pentahydrate               |
| 2096 B20 | X | 473    | 480    | -0.31747996 | 512    | 520    | -0.10933236 | 1497573 | -0.06272678 | 1650542 | 0.16950739  | experimental | Prestwick | 569      | Dihydroergotamine mesylate             |
| 2096 B21 | X | 513    | 520    | -0.16126625 | 450    | 520    | -0.15886095 | 1950518 | 0.63746488  | 1817743 | 0.42233963  | experimental | Prestwick | 490      | Iobenguane sulfate                     |
| 2096 B22 | X | 672    | 680    | 0.45968325  | 1113   | 1120   | 0.37077541  | 1147685 | -0.60360626 | 1158495 | -0.57470604 | experimental | Prestwick | 570      | Emetine dihydrochloride                |
| 2096 B24 | P | 175366 | 176320 | 682.699631  | 133396 | 134320 | 106.044813  | 1396422 | -0.21909523 | 1354675 | -0.27798684 | empty        |           |          |                                        |
| 2096 C01 | N | 516    | 520    | -0.14955022 | 477    | 480    | -0.13729205 | 1413352 | -0.19292104 | 1357095 | -0.27432663 | empty        |           |          |                                        |
| 2096 C03 | X | 556    | 560    | 0.00666349  | 755    | 760    | 0.08478775  | 1414961 | -0.19043375 | 1496366 | -0.06368141 | experimental | Prestwick | 331      | Tremorin dihydrochloride               |
| 2096 C04 | X | 594    | 600    | 0.15506652  | 672    | 680    | 0.01848335  | 1695059 | 0.24255985  | 1870718 | 0.50252016  | experimental | Prestwick | 411      | Androsterone                           |
| 2096 C05 | X | 353    | 360    | -0.78612109 | 594    | 760    | 0.08398889  | 1457179 | -0.12517403 | 1517146 | -0.03225198 | experimental | Prestwick | 332      | Practolol                              |
| 2096 C06 | X | 515    | 520    | -0.15345556 | 754    | 600    | -0.04382681 | 1112554 | -0.65791403 | 1124995 | -0.62537426 | experimental | Prestwick | 412      | Amisomycin                             |
| 2096 C07 | X | 515    | 520    | -0.16907693 | 635    | 640    | -0.01748008 | 1539953 | 0.00278697  | 1580811 | 0.03461334  | experimental | Prestwick | 333      | Acetabuvine, AZT                       |
| 2096 C08 | X | 674    | 680    | 0.46748194  | 635    | 640    | -0.01107403 | 1755605 | -0.08122118 | 1899841 | 0.54656825  | experimental | Prestwick | 413      | Carpazone                              |
| 2096 C09 | X | 511    | 520    | -0.16907693 | 591    | 600    | -0.04622335 | 1779455 | 0.37302464  | 1721951 | 0.27751239  | experimental | Prestwick | 334      | Sulfisoxazole                          |
| 2096 C10 | X | 1434   | 1440   | 3.43555443  | 1273   | 1280   | 0.49859113  | 1315478 | -0.344221   | 1309360 | -0.34652507 | experimental | Prestwick | 414      | Apigenin                               |
| 2096 C11 | X | 472    | 480    | -0.3213853  | 673    | 680    | 0.0192822   | 1631356 | 0.14408363  | 1719777 | 0.27422425  | experimental | Prestwick | 335      | Zaprinasat                             |
| 2096 C12 | X | 475    | 480    | -0.3096927  | 513    | 520    | -0.10853352 | 1622788 | 0.13083866  | 1818001 | 0.42278652  | experimental | Prestwick | 415      | Aspartic acid, N-acetyl (R,S)          |
| 2096 C13 | X | 391    | 400    | -0.63771806 | 592    | 600    | -0.04542451 | 1456139 | -0.12677813 | 1659631 | 0.18325436  | experimental | Prestwick | 336      | Chlormezanone                          |
| 2096 C14 | X | 515    | 520    | -0.15345556 | 473    | 480    | -0.14048744 | 1668512 | 0.20152178  | 1788313 | 0.37788388  | experimental | Prestwick | 416      | Bacampicillin hydrochloride            |
| 2096 C15 | X | 515    | 520    | -0.15345556 | 672    | 680    | 0.01848335  | 1748212 | -0.06498008 | 1759802 | 0.34347208  | experimental | Prestwick | 337      | Acetaminophen hydrochloride            |
| 2096 C16 | X | 673    | 680    | 0.46358859  | 833    | 840    | 0.14709791  | 1859815 | 0.49725032  | 1815642 | 0.41921857  | experimental | Prestwick | 417      | Betulic acid                           |
| 2096 C17 | X | 873    | 880    | 1.24465714  | 672    | 680    | 0.01848335  | 1897153 | 0.55496981  | 1579545 | 0.06212553  | experimental | Prestwick | 338      | N6-methyladenosine                     |
| 2096 C18 | X | 513    | 520    | -0.16126625 | 912    | 920    | 0.21020692  | 1674893 | 0.21138594  | 1888003 | 0.52866346  | experimental | Prestwick | 418      | Biotin                                 |
| 2096 C19 | X | 593    | 600    | 0.15116117  | 512    | 520    | -0.10933236 | 1623102 | 0.13132406  | 1573242 | 0.05259234  | experimental | Prestwick | 339      | Guafacine hydrochloride                |
| 2096 C20 | X | 554    | 560    | -0.00114719 | 634    | 640    | -0.01187288 | 1803980 | 0.41093697  | 1894937 | 0.53915102  | experimental | Prestwick | 419      | Bisacodyl                              |
| 2096 C21 | X | 513    | 520    | -0.16126625 | 513    | 520    | -0.10853352 | 1294480 | -0.37668106 | 1366642 | -0.25988694 | experimental | Prestwick | 340_2009 | Domperidone                            |
| 2096 C22 | X | 672    | 680    | 0.76820533  | 710    | 720    | 0.04883958  | 1693864 | 0.24071254  | 1742722 | 0.11668044  | experimental | Prestwick | 420      | Calciferol                             |
| 2096 C24 | P | 143866 | 144880 | 559.681334  | 127522 | 128440 | 101.385237  | 1285161 | -0.39108697 | 1438926 | -0.15055851 | empty        |           |          |                                        |
| 2096 D01 | N | 557    | 560    | 0.01056883  | 357    | 360    | -0.23315384 | 1280626 | -0.39809747 | 1245621 | -0.44229232 | empty        |           |          |                                        |
| 2096 D02 | E | 117    | 120    | -1.70778198 | 117    | 120    | -0.42487741 | 87536   | -2.2424531  | 89009   | -2.19228696 | empty        |           |          |                                        |
| 2096 D03 | X | 313    | 320    | -0.9423348  | 754    | 360    | -0.23555038 | 1056901 | -0.74394603 | 1008706 | -0.80125957 | experimental | Prestwick | 491      | Metixene hydrochloride                 |
| 2096 D04 | X | 515    | 520    | -0.15345556 | 315    | 720    | 0.05283382  | 1569466 | 0.04841007  | 1509063 | -0.04447739 | experimental | Prestwick | 571      | Tetracaine hydrochloride               |
| 2096 D05 | X | 835    | 840    | 1.09625412  | 593    | 600    | -0.04462566 | 1492077 | -0.07122285 | 1415377 | -0.18617601 | experimental | Prestwick | 492      | Nitrofurantoin                         |
| 2096 D06 | X | 551    | 560    | -0.01286333 | 594    | 600    | -0.01347958 | 1294480 | -0.29475024 | 1347480 | -0.03463316 | experimental | Prestwick | 572      | Clometasone furate                     |
| 2096 D07 | X | 1514   | 1520   | 3.74789895  | 954    | 960    | 0.24375895  | 1845634 | -0.08118285 | 1858745 | -0.18188405 | experimental | Prestwick | 493      | Omeprazole                             |
| 2096 D08 | X | 510    | 520    | -0.17298228 | 433    | 440    | -0.17244137 | 1756311 | 0.33724715  | 1627474 | 0.1346714   | experimental | Prestwick | 573      | Tomatidine                             |
| 2096 D09 | X | 512    | 520    | -0.16517159 | 512    | 520    | -0.10933236 | 1769441 | 0.35754435  | 1823248 | 0.43072253  | experimental | Prestwick | 494      | Propylthiouracil                       |
| 2096 D10 | X | 671    | 680    | 0.45577791  | 432    | 440    | -0.17324022 | 1575275 | 0.05739     | 1564921 | 0.04000696  | experimental | Prestwick | 574      | Dacarbazine                            |
| 2096 D11 | X | 434    | 440    | -0.46978833 | 314    | 320    | -0.26750431 | 1825211 | 0.44375722  | 1520749 | -0.0268025  | experimental | Prestwick | 495      | Terconazole                            |
| 2096 D12 | X | 352    | 360    | -0.79002643 | 433    | 440    | -0.17244137 | 1650829 | 0.17418625  | 1627914 | 0.13528289  | experimental | Prestwick | 575      | Ipratropium bromide                    |
| 2096 D13 | X | 1395   | 1400   | 3.28324606  | 1155   | 1160   | 0.40432704  | 1725164 | 0.2890981   | 1925040 | 0.58468134  | experimental | Prestwick | 496      | Tiaprofenic acid                       |
| 2096 D14 | X | 432    | 440    | -0.47369367 | 512    | 520    | -0.10933236 | 1415312 | -0.18899115 | 1450375 | -0.13324208 | experimental | Prestwick | 576      | Acetopromazine maleate salt            |
| 2096 D15 | X | 555    | 560    | 0.00275815  | 634    | 640    | -0.01187288 | 1978180 | 0.68022659  | 1973620 | 0.65815784  | experimental | Prestwick | 497      | Vancomycin hydrochloride               |
| 2096 D16 | X | 514    | 520    | -0.1573609  | 433    | 440    | -0.17244137 | 1825295 | 0.44388707  | 1610417 | 0.10881895  | experimental | Prestwick | 577      | Rauwolficine hydrochloride             |
| 2096 D17 | X | 553    | 560    | -0.00505254 | 514    | 520    | -0.10773467 | 1654606 | 0.18002498  | 1698035 | 0.24133981  | experimental | Prestwick | 498      | Artemisinin                            |
| 2096 D18 | X | 433    | 440    | -0.47369367 | 673    | 680    | 0.0192822   | 1503059 | -0.05424616 | 2066966 | 0.79934221  | experimental | Prestwick | 578      | Corynanthine hydrochloride             |
| 2096 D19 | X | 834    | 840    | 1.09234878  | 353    | 360    | -0.23634923 | 1484266 | -0.0832976  | 1621068 | 0.12492842  | experimental | Prestwick | 499      | Profenone hydrochloride                |
| 2096 D20 | X | 392    | 400    | -0.63381272 | 673    | 680    | 0.0192822   | 1418628 | -0.18476506 | 1752664 | 0.32396533  | experimental | Prestwick | 579      | Palmitate chloride                     |
| 2096 D21 | X | 634    | 640    | 0.31128023  | 74     | 80     | -0.0192822  | 1711080 | 0.26732614  | 1730145 | 0.28990569  | experimental | Prestwick | 500      | Ethivanol                              |
| 2096 D22 | X | 871    | 880    | 1.25684646  | 791    | 800    | 0.11354629  | 1877330 | 0.21515321  | 1569961 | 0.04762988  | experimental | Prestwick | 580      | Trimethylchloridic acid                |
| 2096 D23 | E | 452    | 960    | -0.39949216 | 466    | 1000   | -0.14607938 | 88452   | -2.24103709 | 87269   | -2.19491868 | empty        |           |          |                                        |
| 2096 D24 | P | 172101 | 172880 | 669.948687  | 180899 | 181760 | 143.9925    | 1482448 | -0.08610798 | 1706608 | 0.2534896   | empty        |           |          |                                        |
| 2096 E01 | N | 477    | 480    | -0.30185859 | 477    | 480    | -0.13729205 | 1366651 | -0.26511447 | 1406069 | -0.20025422 | empty        |           |          |                                        |
| 2096 E02 | E | 115    | 120    | -1.71559266 | 156    | 160    | -0.39372233 | 86287   | -2.24438389 | 85667   | -2.19734166 | empty        |           |          |                                        |
| 2096 E03 | X | 1117   | 1120   | 2.19756078  | 597    | 600    | -0.04143027 | 1548018 | 0.01525436  | 1495214 | -0.06542379 | experimental | Prestwick | 341      | Furosemide                             |
| 2096 E04 | X | 113    | 120    | -1.72340335 | 74     | 80     | -0.4592786  | 546846  | -1.5324202  | 546024  | -1.50408386 | experimental | Prestwick | 421      | Sulcitol                               |
| 2096 E05 | X | 355    | 360    | -0.77839504 | 395    | 400    | -0.20279796 | 1537291 | -0.08112812 | 1483655 | -0.0829066  | experimental | Prestwick | 342      | Acrylamide hydrochloride               |
| 2096 E06 | X | 394    | 400    | -0.62600204 | 554    | 560    | -0.07578074 | 1578684 | 0.06265985  | 1578417 | 0.06041945  | experimental | Prestwick | 422      | Carboline                              |
| 2096 E07 | X | 431    | 440    | -0.48150435 | 473    | 480    | -0.14048744 | 1379330 | -0.24551445 | 1318103 | -0.33330142 | experimental | Prestwick | 343      | Desipramine hydrochloride              |
| 2096 E08 | X | 713    | 720    | 0.6198023   | 431    | 440    | -0.17403907 | 1901079 |             |         |             |              |           |          |                                        |

|          |   |        |        |               |        |        |             |          |             |         |             |              |           |          |  |  |  |  |                                               |
|----------|---|--------|--------|---------------|--------|--------|-------------|----------|-------------|---------|-------------|--------------|-----------|----------|--|--|--|--|-----------------------------------------------|
| 2096 F01 | N | 436    | 440    | -0.46197764   | 397    | 400    | -0.20119991 | 1496000  | -0.06515842 | 1358836 | -0.27169339 | empty        |           |          |  |  |  |  |                                               |
| 2096 F02 | E | 77     | 80     | -1.86399569   | 117    | 120    | -0.42487741 | 87584    | -2.2423789  | 84369   | -2.19930489 | empty        |           |          |  |  |  |  |                                               |
| 2096 F03 | X | 434    | 440    | -0.46978833   | 395    | 400    | -0.2027976  | 1670560  | 0.20468771  | 1644423 | 0.1602525   | experimental | Prestwick | 501      |  |  |  |  | Vigabatrin                                    |
| 2096 F04 | X | 516    | 520    | -0.14955022   | 515    | 520    | -0.10693582 | 14550051 | -0.13618936 | 1414486 | -0.18752363 | experimental | Prestwick | 501      |  |  |  |  | Hydralazine hydrochloride                     |
| 2096 F05 | X | 354    | 360    | -0.78221575   | 635    | 640    | -0.01107403 | 1552987  | 0.02293573  | 1644350 | 0.16104343  | experimental | Prestwick | 502      |  |  |  |  | Biperiden hydrochloride                       |
| 2096 F06 | X | 595    | 600    | -0.15897186   | 554    | 560    | -0.07578074 | 1579338  | 0.06367085  | 1654846 | 0.17601712  | experimental | Prestwick | 582      |  |  |  |  | Leboline alpha hydrochloride                  |
| 2096 F07 | X | 513    | 520    | -0.16126625   | 473    | 480    | -0.14048744 | 1645056  | 0.16526198  | 1755137 | 0.3277057   | experimental | Prestwick | 503      |  |  |  |  | Cetirizine dihydrochloride                    |
| 2096 F08 | X | 593    | 600    | 0.15116117    | 474    | 480    | 0.17985069  | 1495717  | -0.0655959  | 1548667 | -0.126448   | experimental | Prestwick | 583      |  |  |  |  | Papaverine hydrochloride                      |
| 2096 F09 | X | 433    | 440    | -0.47369367   | 871    | 880    | -0.14208514 | 1760661  | 0.34397166  | 1692634 | 0.23317089  | experimental | Prestwick | 504      |  |  |  |  | Etifenine                                     |
| 2096 F10 | X | 474    | 480    | -0.31357461   | 434    | 440    | -0.17164252 | 1559169  | 0.0324923   | 1644249 | 0.15998933  | experimental | Prestwick | 584      |  |  |  |  | Yohimbine hydrochloride                       |
| 2096 F11 | X | 554    | 560    | -0.00114719   | 554    | 560    | -0.07578074 | 1848307  | 0.47946051  | 1944505 | 0.61412185  | experimental | Prestwick | 505      |  |  |  |  | Metaprotérenol sulfate, orciprenaline sulfate |
| 2096 F12 | X | 555    | 560    | 0.00275815    | 433    | 440    | -0.17244137 | 1535599  | -0.00394373 | 1644350 | -0.03713428 | experimental | Prestwick | 585      |  |  |  |  | Leboline alpha (-) hydrochloride              |
| 2096 F13 | X | 434    | 440    | -0.46978833   | 635    | 640    | -0.01107403 | 1844549  | 0.47365115  | 1632439 | 0.14212689  | experimental | Prestwick | 506      |  |  |  |  | Sisomicin sulfate                             |
| 2096 F14 | X | 431    | 440    | -0.48150435   | 592    | 600    | -0.04542451 | 1604607  | 0.1027333   | 1559626 | 0.03199836  | experimental | Prestwick | 586      |  |  |  |  | Berberine chloride                            |
| 2096 F15 | X | 1635   | 1640   | 4.22052833    | 1035   | 1040   | 0.30846525  | 1731046  | 0.29819088  | 1632078 | 0.14158088  | experimental | Prestwick | 507      |  |  |  |  | Quercetine dihydrate                          |
| 2096 F16 | X | 387    | 400    | -0.65333943   | 471    | 480    | -0.14208514 | 1534836  | -0.00512322 | 1569957 | 0.04762383  | experimental | Prestwick | 587_2009 |  |  |  |  | Clostrazol                                    |
| 2096 F17 | X | 1834   | 1834   | 4.99769153    | 1474   | 1480   | 0.65915962  | 1640314  | 0.15793149  | 1481693 | -0.08587409 | experimental | Prestwick | 508      |  |  |  |  | Resveratrol                                   |
| 2096 F18 | X | 589    | 600    | 0.1355398     | 747    | 760    | 0.07839697  | 1719752  | 0.28073188  | 1552669 | 0.021476    | experimental | Prestwick | 588      |  |  |  |  | Galanthamine hydrobromide                     |
| 2096 F19 | X | 394    | 400    | -0.6260204    | 432    | 440    | -0.17324022 | 1484237  | -0.08334243 | 1538218 | -0.00038091 | experimental | Prestwick | 509      |  |  |  |  | Bromperidol                                   |
| 2096 F20 | X | 433    | 440    | -0.47369367   | 754    | 760    | 0.0839889   | 1502890  | -0.05450741 | 1648273 | 0.16607556  | experimental | Prestwick | 589      |  |  |  |  | Bicycluciline (+)                             |
| 2096 F21 | X | 714    | 720    | 0.62370765    | 352    | 360    | -0.23714808 | 1534491  | -0.00556555 | 1641767 | 0.15623534  | experimental | Prestwick | 510      |  |  |  |  | Cilicizine hydrochloride                      |
| 2096 F22 | X | 672    | 680    | 0.45968325    | 752    | 760    | 0.08239121  | 1459929  | -0.1209193  | 1563068 | 0.03720433  | experimental | Prestwick | 590      |  |  |  |  | Yohimbic acid monohydrate                     |
| 2096 F23 | E | 324    | 760    | -0.89937603   | 233    | 640    | -0.33221101 | 88679    | -2.24068618 | 86569   | -2.19597742 | empty        |           |          |  |  |  |  |                                               |
| 2096 F24 | P | 147709 | 148480 | 574.689566    | 137081 | 138000 | 108.988569  | 1421816  | -0.17983684 | 1487317 | -0.07736788 | empty        |           |          |  |  |  |  |                                               |
| 2096 G01 | N | 757    | 760    | 0.79167339    | 357    | 360    | -0.23315384 | 1516106  | -0.03407727 | 1361861 | -0.26711813 | empty        |           |          |  |  |  |  |                                               |
| 2096 G02 | E | 116    | 120    | -1.71168751   | 433    | 440    | -0.42487741 | 87794    | -2.24205427 | 152424  | -2.17961949 | empty        |           |          |  |  |  |  |                                               |
| 2096 G03 | X | 396    | 400    | -0.61819135   | 556    | 560    | -0.07418304 | 1500575  | 0.05808609  | 1455242 | -0.12588082 | experimental | Prestwick | 351      |  |  |  |  | Chlorthalidone                                |
| 2096 G04 | X | 395    | 480    | -0.30966927   | 514    | 520    | -0.10773467 | 2423357  | 1.36840996  | 2224373 | 1.03741784  | experimental | Prestwick | 431      |  |  |  |  | Carolyne chloride hydrate                     |
| 2096 G05 | X | 435    | 440    | -0.46588298   | 394    | 400    | -0.20359645 | 1369564  | -0.26061136 | 1222782 | -0.47747295 | experimental | Prestwick | 352      |  |  |  |  | Dobutamine hydrochloride                      |
| 2096 G06 | X | 433    | 440    | -0.47369367   | 474    | 480    | -0.1396886  | 1810247  | 0.4206249   | 1670349 | 0.19946517  | experimental | Prestwick | 432      |  |  |  |  | Corticosterone                                |
| 2096 G07 | X | 755    | 760    | 0.7838267     | 634    | 640    | -0.01187288 | 1642982  | 0.16205585  | 1473878 | -0.09769416 | experimental | Prestwick | 353_2009 |  |  |  |  | Moclobemide                                   |
| 2096 G08 | X | 593    | 600    | 0.15116117    | 532    | 560    | -0.07737843 | 1688754  | 0.23281317  | 1507767 | -0.04643757 | experimental | Prestwick | 433      |  |  |  |  | Cyanocobalamin                                |
| 2096 G09 | X | 474    | 480    | -0.31357461   | 354    | 360    | -0.23555038 | 1800072  | 0.40489573  | 1416971 | -0.18376511 | experimental | Prestwick | 354      |  |  |  |  | Clopidamide                                   |
| 2096 G10 | X | 434    | 440    | -0.46588298   | 434    | 440    | -0.17164252 | 1777514  | 0.3790411   | 1395810 | 0.16786149  | experimental | Prestwick | 434      |  |  |  |  | Clopidoxil                                    |
| 2096 G11 | X | 435    | 440    | -0.46588298   | 674    | 680    | 0.02080105  | 802677   | -1.13694192 | 734013  | -1.21672845 | experimental | Prestwick | 355      |  |  |  |  | Yohanthone                                    |
| 2096 G12 | X | 394    | 400    | -0.6260204    | 554    | 560    | -0.07578074 | 1599486  | 0.09481693  | 1393455 | -0.21933269 | experimental | Prestwick | 435      |  |  |  |  | Cyclosporin A                                 |
| 2096 G13 | X | 515    | 520    | -0.15345556   | 513    | 520    | -0.10853352 | 1335152  | -0.01380766 | 1650062 | 0.1687814   | experimental | Prestwick | 356      |  |  |  |  | Adenosine 5'-monophosphate monohydrate        |
| 2096 G14 | X | 475    | 480    | -0.30966927   | 555    | 560    | -0.07498189 | 1261104  | -0.42827584 | 1726296 | -0.39653386 | experimental | Prestwick | 436      |  |  |  |  | Digitoxigenin                                 |
| 2096 G15 | X | 391    | 400    | -0.63771806   | 353    | 360    | -0.23634923 | 1337186  | -0.31066337 | 1440342 | -0.14841684 | experimental | Prestwick | 357      |  |  |  |  | Amoxicillin                                   |
| 2096 G16 | X | 634    | 640    | 0.31128023    | 354    | 360    | -0.23555038 | 1368123  | -0.26283895 | 1350399 | -0.2774363  | experimental | Prestwick | 437      |  |  |  |  | Digoxin                                       |
| 2096 G17 | X | 434    | 480    | -0.3331308511 | 548    | 560    | -0.08057383 | 1796101  | 0.35867571  | 1483272 | 0.17137621  | experimental | Prestwick | 358      |  |  |  |  | Cephalexin monohydrate                        |
| 2096 G18 | X | 914    | 920    | 1.4407762     | 1714   | 1720   | 0.85088319  | 3314896  | -0.34512069 | 1307859 | -0.34879531 | experimental | Prestwick | 438      |  |  |  |  | Doxorubicin hydrochloride                     |
| 2096 G19 | X | 553    | 560    | -0.00505254   | 590    | 600    | -0.0470222  | 1540104  | 0.00302039  | 1847488 | 0.46738515  | experimental | Prestwick | 359      |  |  |  |  | Dextromethorphan hydrobromide monohydrate     |
| 2096 G20 | X | 514    | 520    | -0.1573609    | 632    | 640    | -0.01347058 | 1756134  | 0.33697353  | 1758254 | 0.33242011  | experimental | Prestwick | 439      |  |  |  |  | Carbimazole                                   |
| 2096 G21 | X | 593    | 600    | 0.15116117    | 793    | 800    | 0.11514398  | 1360153  | -0.27515949 | 1363666 | -0.26438809 | experimental | Prestwick | 360      |  |  |  |  | Droperidol                                    |
| 2096 G22 | X | 672    | 680    | 0.45968325    | 831    | 840    | 0.14550022  | 1641836  | 0.16028429  | 1802652 | 0.3995714   | experimental | Prestwick | 440      |  |  |  |  | Epiandrosterone                               |
| 2096 G23 | E | 381    | 800    | -0.67677149   | 482    | 920    | -0.13329781 | 86709    | -2.24373153 | 84347   | -2.19933816 | empty        |           |          |  |  |  |  |                                               |
| 2096 G24 | P | 141466 | 142320 | 550.308511    | 147834 | 148760 | 117.6559469 | 1445594  | -0.14308082 | 1430305 | -0.17860149 | empty        |           |          |  |  |  |  |                                               |
| 2096 H01 | N | 396    | 400    | -0.61819135   | 597    | 600    | 0.04143027  | 1370084  | -0.25980751 | 1286175 | -0.38159202 | experimental | Prestwick | 397      |  |  |  |  |                                               |
| 2096 H02 | E | 77     | 80     | -1.86399569   | 157    | 160    | -0.39292348 | 85192    | -2.24607661 | 87727   | -2.19422596 | empty        |           |          |  |  |  |  |                                               |
| 2096 H03 | X | 355    | 360    | -0.7783104    | 275    | 280    | -0.29865939 | 1303059  | -0.36341909 | 1384218 | -0.23303351 | experimental | Prestwick | 511      |  |  |  |  | Fluoxetine hydrochloride                      |
| 2096 H04 | X | 515    | 520    | -0.15345556   | 515    | 520    | -0.10693582 | 1654602  | 0.1800188   | 1590766 | 0.07909712  | experimental | Prestwick | 591      |  |  |  |  | Laudanosine (R,S)                             |
| 2096 H05 | X | 354    | 360    | -0.78221575   | 354    | 360    | -0.23555038 | 1850385  | 0.48267282  | 1576989 | 0.05825962  | experimental | Prestwick | 512      |  |  |  |  | Iohexol                                       |
| 2096 H06 | X | 476    | 480    | -0.30576393   | 635    | 640    | -0.01107403 | 1534925  | -0.00498564 | 1534702 | -0.00569881 | experimental | Prestwick | 592      |  |  |  |  | Ajmalicine hydrochloride                      |
| 2096 H07 | X | 313    | 320    | -0.9423348    | 430    | 440    | -0.17483792 | 1380545  | -0.24363622 | 1453945 | -0.12784251 | experimental | Prestwick | 513      |  |  |  |  | Norcyclohexaprine                             |
| 2096 H08 | X | 434    | 440    | -0.46978833   | 714    | 720    | 0.05203498  | 1583019  | 0.06936117  | 1296760 | -0.3657185  | experimental | Prestwick | 593_2009 |  |  |  |  | Trigonelline                                  |
| 2096 H09 | X | 555    | 560    | 0.00275815    | 474    | 480    | -0.1396886  | 1795960  | 0.34226966  | 1832660 | 0.44495803  | experimental | Prestwick | 514      |  |  |  |  | Pyrazinamide                                  |
| 2096 H10 | X | 354    | 360    | -0.78221575   | 435    | 440    | -0.17084368 | 1530215  | -0.01226666 | 1795839 | 0.38926684  | experimental | Prestwick | 594      |  |  |  |  | Diclofenac sodium                             |
| 2096 H11 | X | 475    | 480    | -0.30966927   | 434    | 440    | -0.17164252 | 1812248  | 0.42371818  | 1751032 | 0.32149695  | experimental | Prestwick | 515      |  |  |  |  | Trimethadione                                 |
| 2096 H12 | X | 396    | 400    | -0.61819135   | 515    | 520    | -0.10693582 | 1416106  | -0.18866373 | 1512497 | -0.03928352 | experimental | Prestwick | 595      |  |  |  |  | Calycanthine                                  |
| 2096 H13 | X | 395    | 400    | -0.62209669   | 515    | 520    | -0.10693582 | 1930363  | 0.06306798  | 1836494 | 0.45075699  | experimental | Prestwick | 516      |  |  |  |  | Loxastatin                                    |
| 2096 H14 | X | 435    | 440    | -0.46588298   | 394    | 400    | -0.20359645 | 1600760  | 0.09678636  | 1669920 | 0.19881631  | experimental | Prestwick | 596      |  |  |  |  | Convallamine hydrochloride                    |
| 2096 H15 | X | 474    | 480    | -0.31357461   | 474    | 480    | -0.1396886  | 1735730  | 0.30543171  | 1803226 | 0.40043956  | experimental | Prestwick | 517      |  |  |  |  | Nystatine                                     |
| 2096 H16 | X | 674    | 680    | 1.46493934    | 715    | 720    | 0.05283382  | 1689035  | 0.23324756  | 1581895 | 0.06567987  | experimental | Prestwick | 597      |  |  |  |  | Isocorydine (+)                               |
| 2096 H17 | X | 474    | 480    | -0.31357461   | 594    | 600    | -0.04382681 | 1642929  | 0.16197392  | 1733971 | 0.29569245  | experimental | Prestwick | 518      |  |  |  |  | Budesonide                                    |
| 2096 H18 | X | 433    | 440    | -0.47369367   | 309    | 320    | -0.27149855 | 1522186  | -0.02467841 | 1617616 | 0.11970733  | experimental | Prestwick | 598      |  |  |  |  | Xylazine                                      |
| 2096 H19 | X | 514    | 520    | -0.1573609    | 672    | 680    | 0.01848335  | 1774354  | 0.36513918  | 1822057 | 0.42892116  | experimental | Prestwick | 519      |  |  |  |  | Impipenem                                     |
| 2096 H20 | X | 554    | 560    | -0.00114719   | 752    |        |             |          |             |         |             |              |           |          |  |  |  |  |                                               |

|          |   |        |            |             |        |            |             |            |             |            |             |              |           |                           |                                                      |
|----------|---|--------|------------|-------------|--------|------------|-------------|------------|-------------|------------|-------------|--------------|-----------|---------------------------|------------------------------------------------------|
| 2096 I19 | X | 674    | 680        | 0.46749394  | 953    | 960        | 0.2429597   | 1496151    | -0.064925   | 1539570    | 0.001666397 | experimental | Prestwick | 369_2009                  | Meloxicam                                            |
| 2096 I20 | X | 594    | 600        | 0.15506652  | 431    | 440        | -0.17403907 | 1841587    | 0.4690723   | 1668469    | 0.1966217   | experimental | Prestwick | 449                       | Pilocarpine nitrate                                  |
| 2096 I21 | X | 553    | 560        | -0.00505254 | 634    | 640        | -0.01187288 | 1199196    | -0.52397723 | 1169973    | -0.55734574 | experimental | Prestwick | 370                       | Benzbromarone                                        |
| 2096 I22 | X | 890    | 1.24075168 | 712         | 720    | 0.05043728 | 1603135     | 0.10045779 | 1650436     | 0.23579051 | empty       | Prestwick    | 450       | Dicloxacillin sodium salt |                                                      |
| 2096 I23 | E | 464    | 840        | -0.2562804  | 686    | 720        | -0.20998724 | 85572      | -2.24548918 | 86928      | -2.19543444 | empty        |           |                           |                                                      |
| 2096 I24 | P | 126424 | 127240     | 491.564346  | 112059 | 112840     | 88.9997891  | 1465844    | -0.11177552 | 1350737    | -0.283943   | empty        |           |                           |                                                      |
| 2096 J01 | N | 476    | 480        | -0.30576393 | 557    | 560        | -0.07338419 | 1371991    | -0.25685955 | 1229491    | -0.46732569 | empty        |           |                           |                                                      |
| 2096 J02 | E | 117    | 120        | -1.70778198 | 156    | 160        | -0.39372233 | 85756      | -2.24520474 | 85834      | -2.1970891  | empty        |           |                           |                                                      |
| 2096 J03 | X | 315    | 320        | -0.93452411 | 516    | 520        | -0.10613697 | 1538961    | 0.00125347  | 1631518    | 0.14073389  | experimental | Prestwick | 521                       | Glycocholic acid                                     |
| 2096 J04 | X | 515    | 520        | -0.15345556 | 513    | 520        | -0.10853352 | 1408254    | -0.20080186 | 1496803    | -0.06302045 | experimental | Prestwick | 521                       | Scoulerine                                           |
| 2096 J05 | X | 389    | 400        | -0.64552875 | 394    | 400        | -0.20359645 | 1262824    | -0.42561695 | 1285467    | -0.38266286 | experimental | Prestwick | 602                       | Thiostrepton                                         |
| 2096 J06 | X | 2355   | 2360       | 7.03237511  | 554    | 560        | -0.07578074 | 1231517    | -0.47401334 | 1417303    | -0.18323994 | experimental | Prestwick | 602                       | Almaline                                             |
| 2096 J07 | X | 469    | 480        | -0.33310133 | 551    | 560        | -0.07817728 | 1800881    | 0.40614633  | 1754657    | 0.32697971  | experimental | Prestwick | 523                       | Methionine sulfoximine (L)                           |
| 2096 J08 | X | 312    | 320        | -0.94624014 | 429    | 440        | -0.17563676 | 1638425    | 0.15501135  | 1491189    | -0.07151154 | experimental | Prestwick | 603                       | Monocrotaline                                        |
| 2096 J09 | X | 1195   | 1200       | 2.50217751  | 2114   | 2120       | 1.17042247  | 1863898    | 0.50356208  | 1827447    | 0.43707345  | experimental | Prestwick | 524                       | Tiabendazole                                         |
| 2096 J10 | X | 512    | 520        | -0.16517159 | 389    | 400        | -0.20759069 | 1146122    | -0.60602245 | 1161697    | -0.56986306 | experimental | Prestwick | 604                       | Piperlongumine                                       |
| 2096 J11 | X | 474    | 480        | -0.31357461 | 714    | 720        | 0.05203498  | 1586201    | 0.07428011  | 1743333    | 0.30985233  | experimental | Prestwick | 525                       | Rifampicin                                           |
| 2096 J12 | X | 756    | 760        | 0.78773204  | 474    | 480        | -0.1396886  | 1510353    | -0.04297063 | 1580301    | 0.06326897  | experimental | Prestwick | 605                       | Hydrocotarnine hydrobromide                          |
| 2096 J13 | X | 434    | 440        | -0.46978833 | 555    | 560        | -0.07498189 | 1736435    | 0.30652154  | 1704291    | 0.25080192  | experimental | Prestwick | 526                       | Ethionamide                                          |
| 2096 J14 | X | 675    | 680        | 0.47139928  | 394    | 400        | -0.20359645 | 1446201    | -0.14214093 | 1514226    | -0.03666844 | experimental | Prestwick | 606                       | (-)-Cinchonidine                                     |
| 2096 J15 | X | 393    | 400        | -0.62990738 | 555    | 560        | -0.07498189 | 1683459    | 0.22462782  | 1785918    | 0.37426148  | experimental | Prestwick | 527                       | Tenoxicam                                            |
| 2096 J16 | X | 474    | 480        | -0.31357461 | 434    | 440        | -0.17164252 | 1638309    | 0.15483203  | 1503764    | -0.05249205 | experimental | Prestwick | 607                       | Eburnamnone (-)                                      |
| 2096 J17 | X | 515    | 520        | -0.15345556 | 554    | 560        | -0.07578074 | 1716999    | 0.27647612  | 1616609    | 0.11818426  | experimental | Prestwick | 528                       | Trifusal                                             |
| 2096 J18 | X | 394    | 400        | -0.62600204 | 674    | 680        | 0.02008105  | 1448221    | -0.13901829 | 1613742    | 0.11384796  | experimental | Prestwick | 608                       | Cinchonine                                           |
| 2096 J19 | X | 434    | 440        | -0.46978833 | 512    | 520        | -0.10933236 | 1343124    | -0.30148402 | 1621477    | 0.12554703  | experimental | Prestwick | 529                       | Mesoridazine besylate                                |
| 2096 J20 | X | 434    | 440        | -0.46978833 | 594    | 600        | -0.04382681 | 1515148    | -0.03092061 | 1491421    | 0.13017174  | experimental | Prestwick | 609                       | Anavarine sulfate monohydrate (L, +)                 |
| 2096 J21 | X | 434    | 440        | -0.46978833 | 512    | 520        | -0.10933236 | 732919     | 0.30108628  | 1545575    | 0.01025249  | experimental | Prestwick | 530                       | Timoxine                                             |
| 2096 J22 | X | 672    | 680        | 0.45968325  | 833    | 840        | 0.14709791  | 10068563   | 13.1868635  | 10334561   | 13.3039509  | experimental | Prestwick | 610                       | Harmaline hydrochloride dihydrate                    |
| 2096 J23 | E | 361    | 760        | -0.75487835 | 278    | 640        | -0.29626284 | 88797      | -2.24050376 | 85397      | -2.19775005 | empty        |           |                           |                                                      |
| 2096 J24 | P | 134544 | 135320     | 523.275729  | 121891 | 122560     | 96.8540647  | 1506943    | -0.04824202 | 1441910    | -0.14604526 | empty        |           |                           |                                                      |
| 2096 K01 | N | 797    | 800        | 0.9478511   | 637    | 640        | -0.00947634 | 1397749    | -0.21704117 | 1263653    | -0.4156662  | empty        |           |                           |                                                      |
| 2096 K02 | E | 75     | 80         | -1.87180637 | 76     | 80         | -0.45763018 | 85126      | -2.24617863 | 87076      | -2.19521059 | empty        |           |                           |                                                      |
| 2096 K03 | X | 596    | 600        | 0.1628772   | 355    | 360        | -0.23475153 | 1417914    | -0.18586881 | 1275702    | -0.39743227 | experimental | Prestwick | 371                       | Ketotifen fumarate                                   |
| 2096 K04 | X | 474    | 480        | -0.31357461 | 394    | 400        | -0.20359645 | 1643626    | 0.14703789  | 1543232    | 0.11101925  | experimental | Prestwick | 371_2009                  | Alizaprine HCl                                       |
| 2096 K05 | X | 395    | 400        | -0.62099669 | 595    | 600        | -0.2027976  | 1403231    | -0.20856674 | 1392487    | -0.22079678 | experimental | Prestwick | 372                       | Debrisoquin sulfate                                  |
| 2096 K06 | X | 469    | 480        | -0.33310133 | 394    | 400        | -0.20359645 | 1547853    | 0.0149993   | 1519954    | -0.02800493 | experimental | Prestwick | 452                       | Lactobionic acid                                     |
| 2096 K07 | X | 434    | 440        | -0.46978833 | 433    | 440        | -0.17244137 | 1482219    | -0.08646198 | 1636020    | 0.14754309  | experimental | Prestwick | 373                       | Amethopterin (R,S)                                   |
| 2096 K08 | X | 471    | 480        | -0.32529064 | 592    | 600        | -0.04542451 | 1611360    | 0.11317252  | 1750275    | 0.320352    | experimental | Prestwick | 453                       | Lumicolchicine gamma                                 |
| 2096 K09 | X | 472    | 480        | -0.3213853  | 389    | 400        | -0.20759069 | 1517306    | -0.03222223 | 1572041    | 0.05077585  | experimental | Prestwick | 374                       | Methylergometrine maleate                            |
| 2096 K10 | X | 516    | 520        | -0.14955022 | 421    | 440        | -0.18202755 | 1665540    | 0.19383574  | 1716238    | 0.26887157  | experimental | Prestwick | 454                       | Lysergol                                             |
| 2096 K11 | X | 275    | 280        | -1.09073762 | 474    | 480        | -0.05396645 | 1127812    | -0.63037223 | 1282397    | -0.77495295 | experimental | Prestwick | 375                       | Methiothepin maleate                                 |
| 2096 K12 | X | 274    | 280        | -1.09465117 | 474    | 480        | -0.1396886  | 1407306    | -0.10487787 | 1331083    | -0.31366937 | experimental | Prestwick | 455                       | Methiodoline 1,5-naphthalenedisulfonate              |
| 2096 K13 | X | 435    | 440        | -0.46588298 | 434    | 440        | -0.17164252 | 1496440    | -0.06447824 | 1500005    | -0.05817748 | experimental | Prestwick | 376                       | Clofazimine                                          |
| 2096 K14 | X | 434    | 440        | -0.46978833 | 435    | 440        | -0.17084368 | 1735744    | 0.30545335  | 1672182    | 0.20223755  | experimental | Prestwick | 456                       | Mefloquine sulfosalicylate                           |
| 2096 K15 | X | 555    | 560        | 0.00275815  | 474    | 480        | -0.1396886  | 1669104    | 0.20243693  | 1469932    | -0.10366242 | experimental | Prestwick | 377                       | Nafrolyl oxalate                                     |
| 2096 K16 | X | 434    | 440        | -0.46978833 | 435    | 440        | -0.17084368 | 1758341    | 0.34038525  | 1808048    | 0.40773276  | experimental | Prestwick | 457                       | Meclozine dihydrochloride                            |
| 2096 K17 | X | 515    | 520        | -0.15345556 | 495    | 540        | -0.17084368 | 1604406    | 0.10242258  | 1555566    | 0.02585767  | experimental | Prestwick | 378                       | Bezafibrate                                          |
| 2096 K18 | X | 474    | 480        | -0.31357461 | 394    | 400        | -0.20359645 | 1695552    | 0.24327867  | 1743921    | 0.26687963  | experimental | Prestwick | 458                       | Melastatin                                           |
| 2096 K19 | X | 515    | 520        | -0.15345556 | 435    | 600        | -0.04302796 | 1514508    | 0.05775018  | 1651255    | 0.02018556  | experimental | Prestwick | 379                       | Mimosine                                             |
| 2096 K20 | X | 274    | 280        | -1.09464317 | 433    | 440        | -0.17244137 | 1272619    | -0.41047521 | 1255332    | -0.42824158 | experimental | Prestwick | 459                       | Menadione                                            |
| 2096 K21 | X | 474    | 480        | -0.31357461 | 631    | 640        | -0.01187288 | 1461045    | -0.11919412 | 1399921    | -0.20955297 | experimental | Prestwick | 380                       | Cleboprine maleate                                   |
| 2096 K22 | X | 791    | 800        | 0.92441904  | 631    | 640        | -0.01426943 | 1641923    | 0.16041878  | 1502311    | -0.05468969 | experimental | Prestwick | 460                       | Dinoprost trometamol                                 |
| 2096 K23 | E | 588    | 1000       | 0.13163446  | 493    | 840        | -0.12451048 | 89030      | -2.24014358 | 84101      | -2.19971023 | empty        |           |                           |                                                      |
| 2096 K24 | P | 139124 | 139880     | 541.162199  | 116875 | 117640     | 92.8470421  | 1409923    | -0.19822181 | 1313049    | -0.34094552 | empty        |           |                           |                                                      |
| 2096 L01 | N | 476    | 480        | -0.30576393 | 556    | 560        | -0.07418304 | 1184103    | -0.54730896 | 1162769    | -0.56824168 | empty        |           |                           |                                                      |
| 2096 L02 | E | 76     | 80         | -1.86790103 | 76     | 80         | -0.45763018 | 83050      | -2.24938785 | 83632      | -2.20041959 | empty        |           |                           |                                                      |
| 2096 L03 | X | 595    | 600        | 0.15897186  | 515    | 520        | -0.10693582 | 1422905    | -0.1781534  | 1548817    | 0.01564991  | experimental | Prestwick | 531                       | Prenperone                                           |
| 2096 L04 | X | 554    | 560        | -0.00114719 | 554    | 560        | -0.07578074 | 7789525    | 9.66377927  | 7755492    | 9.40314921  | experimental | Prestwick | 611                       | Harmalol hydrochloride dihydrate                     |
| 2096 L05 | X | 474    | 480        | -0.31357461 | 393    | 400        | -0.2043953  | 1589449    | 0.07930108  | 1606999    | 0.10364928  | experimental | Prestwick | 532                       | Isquinoline, 6,7-dimethoxy-1-methyl-1,2,3,4-tetrahyr |
| 2096 L06 | X | 594    | 600        | 0.15506652  | 794    | 800        | 0.11594283  | 1851510    | 0.48441191  | 2032128    | 0.74665027  | experimental | Prestwick | 612                       | Harmol hydrochloride monohydrate                     |
| 2096 L07 | X | 511    | 520        | -0.16907693 | 790    | 800        | 0.11274744  | 1448264    | -0.13895182 | 1677377    | 0.21009491  | experimental | Prestwick | 533                       | Phenacetin                                           |
| 2096 L08 | X | 1874   | 1880       | 5.15390524  | 1553   | 1560       | 0.72226863  | 1649236    | 0.17172369  | 1626679    | 0.13341498  | experimental | Prestwick | 613                       | Harmine hydrochloride                                |
| 2096 L09 | X | 591    | 600        | 0.14335049  | 639    | 600        | -0.05580953 | 1330567    | -0.32089544 | 1208134    | -0.49962762 | experimental | Prestwick | 534                       | Atovagoune                                           |
| 2096 L10 | X | 235    | 240        | -1.24695153 | 5075   | 5080       | 3.53581203  | 621937     | -1.4163415  | 947335     | -0.89408225 | experimental | Prestwick | 614                       | Ellipticine                                          |
| 2096 L11 | X | 314    | 320        | -0.93842946 | 419    | 440        | -0.18362525 | 1520495    | -0.02729247 | 1606806    | 0.10335737  | experimental | Prestwick | 535                       | Methoxamine hydrochloride                            |
| 2096 L12 | X | 676    | 680        | 0.47530462  | 515    | 520        | -0.10693582 | 1453999    | -0.13008628 | 1520626    | -0.05506663 | experimental | Prestwick | 615                       | Chrysen-1,4-quinone                                  |
| 2096 L13 | X | 394    | 400        | -0.62600204 | 475    | 480        | -0.13888975 | 1633557    | 0.14748608  | 1634523    | 0.1452789   | experimental | Prestwick | 953                       | (S)-(-)-Atenolol                                     |
| 2096 L14 | X | 354    | 360        | -0.78221575 | 314    | 320        | -0.26750431 | 1492494    | -0.00957822 | 1528213    | -0.01551332 | experimental | Prestwick | 536                       | Demecarium bromide                                   |
| 2096 L15 | X | 354    | 360        | -0.78221575 | 515    | 520        | -0.10693582 | 1544443    | 0.07077279  | 1682226    | 0.21742895  | experimental | Prestwick | 617                       | Piracetam                                            |
| 2096 L16 | X | 435    | 440        | -0.46588298 | 395    | 400        | -0.2027976  | 1350027    | -0.29081282 | 1454841    | -0.27775357 | experimental | Prestwick | 537                       | Piizupazine dimaleate salt                           |
| 2096 L17 | X | 383    | 400        | -0.62980388 | 395    | 400        | -0.2027976  | 1574508    | 0.05775018  | 1478812    | -0.09203156 | experimental | Prestwick | 538                       | Reminodin                                            |
| 2096 L18 | X | 675    | 680        | 0.47139928  | 315    | 320        | -0.26670546 | 1552408    | 0.02204071  | 1408889    | -0.19598901 | experimental | Prestwick | 618                       | Sparteine (-)                                        |
| 2096 L19 | X | 554    | 560        | -0.00114719 | 434    | 440        | -0.17164252 | 1449682    | -0.13675978 | 1642178    | 0.15685697  | experimental | Prestwick | 539                       | Thiocolchicoside                                     |
| 2096 L20 | X | 554    | 560        | -0.00114719 | 715    | 720        | 0.05283382  | 1377727    | -0.24799247 | 1562716    | 0.03667193  |              |           |                           |                                                      |

|          |   |        |        |             |        |        |             |         |             |         |             |              |           |     |                                           |
|----------|---|--------|--------|-------------|--------|--------|-------------|---------|-------------|---------|-------------|--------------|-----------|-----|-------------------------------------------|
| 2096 M13 | X | 634    | 640    | 0.31128023  | 474    | 480    | -0.1396886  | 984185  | -0.85635513 | 945049  | -0.89753979 | experimental | Prestwick | 386 | GBR 12909 dihydrochloride                 |
| 2096 M14 | X | 834    | 840    | 1.09234878  | 795    | 800    | 0.11674168  | 1597077 | 0.09109294  | 1660770 | 0.10330292  | experimental | Prestwick | 466 | Naringenine                               |
| 2096 M15 | X | 594    | 600    | 0.15506628  | 474    | 480    | -0.1396886  | 1444019 | -0.14551401 | 1419116 | -0.18052083 | experimental | Prestwick | 387 | Carbetapentane citrate                    |
| 2096 M16 | X | 453    | 440    | -0.47362767 | 514    | 480    | -0.1073467  | 1578600 | 0.062523    | 1733895 | 0.29555751  | experimental | Prestwick | 467 | Naringin hydrate                          |
| 2096 M17 | X | 675    | 680    | 0.7139928   | 435    | 640    | -0.01077403 | 6307699 | -0.35624628 | 1150221 | -0.58722033 | experimental | Prestwick | 388 | Equilinium dichloride                     |
| 2096 M18 | X | 434    | 440    | -0.46978833 | 434    | 440    | -0.17164252 | 1716863 | 0.27626588  | 1592641 | 0.08193303  | experimental | Prestwick | 468 | Neostigmine bromide                       |
| 2096 M19 | X | 474    | 480    | -0.31357461 | 554    | 560    | -0.07578074 | 1316572 | -0.34252982 | 1377126 | -0.24403005 | experimental | Prestwick | 389 | Ketoconazole                              |
| 2096 M20 | X | 513    | 520    | -0.16126625 | 513    | 520    | -0.10853352 | 1450624 | -0.13530357 | 1380388 | -0.23096333 | experimental | Prestwick | 469 | Niridazole                                |
| 2096 M21 | X | 713    | 720    | 0.61980023  | 512    | 520    | -0.10933236 | 1373349 | -0.25476026 | 1343761 | -0.29449409 | experimental | Prestwick | 390 | Fusidic acid sodium salt                  |
| 2096 M22 | X | 591    | 600    | 0.14335049  | 572    | 760    | 0.08239121  | 1421175 | -0.18082774 | 1385913 | -0.23073985 | experimental | Prestwick | 470 | Ceforanide                                |
| 2096 M23 | E | 570    | 960    | 0.06133829  | 750    | 1080   | -0.1133266  | 86597   | -2.24390467 | 83866   | -2.20065667 | empty        |           |     |                                           |
| 2096 M24 | P | 131785 | 132520 | 512.500888  | 194620 | 195480 | -54.953496  | 1271931 | -0.41153876 | 124261  | -0.47131865 | empty        |           |     |                                           |
| 2096 N01 | N | 315    | 320    | -0.93452411 | 276    | 280    | -0.29786054 | 1003072 | -0.82715838 | 1079324 | -0.69445094 | empty        |           |     |                                           |
| 2096 N02 | E | 77     | 80     | -1.86399569 | 117    | 120    | -0.42487741 | 83118   | -2.24928273 | 77213   | -2.21012822 | empty        |           |     |                                           |
| 2096 N03 | X | 435    | 440    | -0.46588298 | 435    | 440    | -0.17084368 | 1453303 | -0.1311622  | 1311950 | -0.34260774 | experimental | Prestwick | 541 | Ciclopirox ethanalamine                   |
| 2096 N04 | X | 474    | 480    | -0.31357461 | 434    | 440    | -0.17164252 | 1225454 | -0.48338591 | 1143839 | -0.59687301 | experimental | Prestwick | 621 | Methoxy-6-harmaline                       |
| 2096 N05 | X | 555    | 560    | 0.00275815  | 475    | 480    | -0.13888975 | 1450686 | -0.13520773 | 1426890 | -0.16876278 | experimental | Prestwick | 542 | Probencid                                 |
| 2096 N06 | X | 314    | 320    | -0.93842946 | 475    | 480    | -0.13888975 | 1220556 | -0.49095756 | 1333828 | -0.3095176  | experimental | Prestwick | 622 | Stachyridine hydrochloride                |
| 2096 N07 | X | 315    | 320    | -0.93452411 | 435    | 440    | -0.17084368 | 1550818 | 0.01958279  | 1523880 | -0.02206691 | experimental | Prestwick | 543 | Betahistine mesylate                      |
| 2096 N08 | X | 474    | 480    | -0.31357461 | 435    | 440    | -0.17084368 | 1357161 | -0.27978472 | 1331268 | -0.31338956 | experimental | Prestwick | 623 | Pyridoxine hydrochloride                  |
| 2096 N09 | X | 595    | 600    | 0.15897186  | 315    | 320    | -0.26670546 | 1517486 | -0.03194397 | 1512076 | -0.03992028 | experimental | Prestwick | 544 | Troxarycin                                |
| 2096 N10 | X | 473    | 480    | -0.31747996 | 473    | 480    | -0.14048744 | 1319618 | -0.33782112 | 1306837 | -0.35034107 | experimental | Prestwick | 624 | Cytisine (-)                              |
| 2096 N11 | X | 474    | 480    | -0.31357461 | 433    | 440    | -0.17244137 | 1567839 | 0.04589495  | 1662876 | 0.18816237  | experimental | Prestwick | 545 | Tetramisole hydrochloride                 |
| 2096 N12 | X | 354    | 360    | -0.78221575 | 555    | 560    | -0.07498189 | 1400110 | -0.21339138 | 1308024 | -0.34854575 | experimental | Prestwick | 625 | Pseudopelletierine hydrochloride          |
| 2096 N13 | X | 714    | 720    | 0.62370765  | 314    | 320    | -0.26750431 | 1522497 | -0.02419765 | 1488016 | -0.07631065 | experimental | Prestwick | 546 | Progrenolone                              |
| 2096 N14 | X | 354    | 360    | -0.78221575 | 395    | 400    | -0.2027976  | 1346439 | -0.3059467  | 1307875 | -0.45533598 | experimental | Prestwick | 626 | Acetazolil                                |
| 2096 N15 | X | 474    | 480    | -0.31357461 | 275    | 280    | -0.29865939 | 1492489 | -0.07058895 | 1440412 | -0.14831096 | experimental | Prestwick | 547 | Molodomin                                 |
| 2096 N16 | X | 594    | 600    | 0.15506652  | 476    | 480    | -0.1380909  | 1561917 | 0.03674034  | 1491643 | -0.07082487 | experimental | Prestwick | 627 | Folic acid                                |
| 2096 N17 | X | 434    | 440    | -0.46978833 | 314    | 320    | -0.26750431 | 1441129 | -0.14998156 | 1368299 | -0.25738075 | experimental | Prestwick | 548 | Chloroquine diphosphate                   |
| 2096 N18 | X | 395    | 400    | -0.62209669 | 395    | 400    | -0.2027976  | 1358949 | -0.27702071 | 1199644 | -0.51246881 | experimental | Prestwick | 628 | Salsolinol hydrochloride                  |
| 2096 N19 | X | 394    | 400    | -0.62600204 | 595    | 600    | -0.04302796 | 1459824 | -0.12108162 | 1473820 | -0.09778188 | experimental | Prestwick | 549 | Trimetazidine dihydrochloride             |
| 2096 N20 | X | 554    | 560    | -0.00114719 | 472    | 480    | -0.14128629 | 1326559 | -0.32709127 | 1229051 | -0.46799118 | experimental | Prestwick | 629 | Gramine                                   |
| 2096 N21 | X | 674    | 680    | 0.46749394  | 874    | 880    | 0.17985069  | 1222204 | -0.48840997 | 1188511 | -0.52393073 | experimental | Prestwick | 550 | Parthenolide                              |
| 2096 N22 | X | 434    | 440    | -0.46978833 | 474    | 480    | -0.16126625 | 1271149 | -0.8749826  | 1368986 | -0.86609347 | experimental | Prestwick | 630 | Dimethisoquin hydrochloride               |
| 2096 N23 | E | 303    | 680    | -0.98138823 | 463    | 920    | -0.14847593 | 83603   | -2.24853299 | 146218  | -2.10575924 | empty        |           |     |                                           |
| 2096 N24 | P | 127336 | 128160 | 495.126018  | 154238 | 155280 | 122.694408  | 1351223 | -0.28896406 | 1395154 | -0.21676298 | empty        |           |     |                                           |
| 2096 O01 | N | 917    | 920    | 1.41649223  | 437    | 440    | -0.16924598 | 1254583 | -0.43835642 | 1133313 | -0.61279342 | empty        |           |     |                                           |
| 2096 O02 | E | 115    | 120    | -1.71559266 | 77     | 80     | -0.45683134 | 79571   | -2.25476591 | 82254   | -2.20250379 | empty        |           |     |                                           |
| 2096 O03 | X | 715    | 720    | 0.62761299  | 394    | 400    | -0.20359645 | 1211490 | -0.50497237 | 1206624 | -0.50191167 | experimental | Prestwick | 391 | Terbutaline hemisulfate                   |
| 2096 O04 | X | 754    | 760    | 0.77992136  | 795    | 800    | 0.11674168  | 1112997 | -0.65722921 | 999092  | -0.81580059 | experimental | Prestwick | 471 | Strophantine octahydrate                  |
| 2096 O05 | X | 435    | 440    | -0.46978833 | 714    | 720    | -0.26750431 | 1240103 | -0.46107054 | 1233357 | -0.75278426 | experimental | Prestwick | 392 | Chlorazepate dihydrochloride              |
| 2096 O06 | X | 555    | 560    | 0.00275815  | 355    | 360    | -0.23164252 | 1238121 | -0.46380445 | 1183501 | -0.55888485 | experimental | Prestwick | 472 | Pantothenic acid calcium salt monohydrate |
| 2096 O07 | X | 473    | 480    | -0.31747996 | 395    | 400    | -0.2027976  | 1343773 | -0.30048076 | 1264411 | -0.41450973 | experimental | Prestwick | 393 | Heximicholium bromide                     |
| 2096 O08 | X | 635    | 640    | 0.31518557  | 555    | 560    | -0.07498189 | 1534849 | -0.00510313 | 1443426 | -0.14375233 | experimental | Prestwick | 473 | Cefotaxim                                 |
| 2096 O09 | X | 432    | 440    | -0.47759901 | 432    | 440    | -0.17324022 | 1294138 | -0.37720975 | 1151882 | -0.58470809 | experimental | Prestwick | 394 | Kanamycin A sulfate                       |
| 2096 O10 | X | 1114   | 1120   | 2.18584475  | 1475   | 1480   | 0.65995846  | 1280803 | -0.39782385 | 1233350 | -0.46148901 | experimental | Prestwick | 474 | Piperine                                  |
| 2096 O11 | X | 474    | 480    | -0.31357461 | 392    | 400    | -0.20519415 | 1258700 | -0.4319921  | 1239727 | -0.45184349 | experimental | Prestwick | 395 | Amikacin hydrate                          |
| 2096 O12 | X | 474    | 480    | -0.31357461 | 554    | 560    | -0.1396886  | 1221149 | -0.49004086 | 1188086 | -0.61798426 | experimental | Prestwick | 475 | Riboflavin                                |
| 2096 O13 | X | 632    | 640    | 0.30347804  | 554    | 560    | -0.07578074 | 1167557 | -0.45195667 | 1744004 | -0.55064392 | experimental | Prestwick | 396 | Etoposide                                 |
| 2096 O14 | X | 235    | 240    | -1.24695153 | 194    | 200    | -0.36336609 | 564669  | -1.50487007 | 489720  | -1.58621781 | experimental | Prestwick | 476 | Primaquine diphosphate                    |
| 2096 O15 | X | 475    | 480    | -0.30966927 | 516    | 520    | -0.10613697 | 1145158 | -0.60751266 | 975092  | -0.85210022 | experimental | Prestwick | 397 | Clomiphene citrate (Z,E)                  |
| 2096 O16 | X | 593    | 600    | 0.15116117  | 353    | 360    | -0.23634923 | 1397306 | -0.21772599 | 1327732 | -0.31873771 | experimental | Prestwick | 477 | Progesterone                              |
| 2096 O17 | X | 474    | 480    | -0.31357461 | 595    | 600    | -0.04302796 | 1323648 | -0.33159128 | 1523199 | -0.02309691 | experimental | Prestwick | 398 | Oxantel pamoate                           |
| 2096 O18 | X | 595    | 600    | 0.15897186  | 315    | 320    | -0.26670546 | 1470157 | -0.1051082  | 1457530 | -0.12242025 | experimental | Prestwick | 478 | Felodipin                                 |
| 2096 O19 | X | 554    | 560    | -0.00114719 | 435    | 440    | -0.17084368 | 1064663 | -0.73194703 | 995496  | -0.82123949 | experimental | Prestwick | 399 | Prochlorperazine dimaleate                |
| 2096 O20 | X | 554    | 560    | -0.00114719 | 634    | 640    | -0.01187288 | 1504110 | -0.05262146 | 1381886 | -0.23683063 | experimental | Prestwick | 479 | Methoxy- $\beta$ -psoralen                |
| 2096 O21 | X | 434    | 440    | -0.46978833 | 552    | 560    | -0.07737843 | 1253325 | -0.44030112 | 1235231 | -0.45864403 | experimental | Prestwick | 400 | Hesperidin                                |
| 2096 O22 | X | 394    | 400    | -0.62600204 | 432    | 440    | -0.17324022 | 649414  | -1.37386577 | 574537  | -1.45793342 | experimental | Prestwick | 480 | Puromycin dihydrochloride                 |
| 2096 O23 | E | 236    | 680    | -1.24304619 | 520    | 1000   | -0.10294158 | 82238   | -2.25064309 | 95467   | -2.18251933 | empty        |           |     |                                           |
| 2096 O24 | P | 150463 | 151360 | 585.44488   | 162484 | 163440 | 129.28171   | 1235401 | -0.46800092 | 1099799 | -0.66348282 | empty        |           |     |                                           |
| 2096 P01 | N | 517    | 520    | -0.14564488 | 518    | 520    | -0.10453927 | 751292  | -1.21637618 | 893861  | -0.97496084 | empty        |           |     |                                           |
| 2096 P02 | E | 117    | 120    | -1.70778198 | 196    | 200    | -0.3617684  | 75030   | -2.26178568 | 89367   | -2.19174549 | empty        |           |     |                                           |
| 2096 P03 | X | 436    | 440    | -0.46197764 | 677    | 680    | 0.02247759  | 1138298 | -0.61011729 | 1153351 | -0.58248626 | experimental | Prestwick | 551 | Hexetidine                                |
| 2096 P04 | X | 515    | 520    | -0.15345556 | 434    | 440    | -0.17164252 | 1105742 | -0.68844446 | 1095324 | -0.67025119 | experimental | Prestwick | 631 | Thiamine hydrochloride                    |
| 2096 P05 | X | 596    | 600    | 0.1628772   | 437    | 440    | -0.16924598 | 1227610 | -0.48005303 | 1287056 | -0.38025952 | experimental | Prestwick | 552 | Selegrin hydrochloride                    |
| 2096 P06 | X | 514    | 520    | -0.15713609 | 356    | 360    | -0.23935268 | 1092456 | -0.68898282 | 1111557 | -0.64569903 | experimental | Prestwick | 632 | Dipivefrin hydrochloride                  |
| 2096 P07 | X | 916    | 920    | 1.41258688  | 516    | 520    | -0.10613697 | 1163781 | -0.57872402 | 1083375 | -0.68832387 | experimental | Prestwick | 553 | Pentamidine isethionate                   |
| 2096 P08 | X | 474    | 480    | -0.31357461 | 475    | 480    | -0.10693582 | 1175512 | -0.56058948 | 1152156 | -0.58429367 | experimental | Prestwick | 633 | Thiorphan                                 |
| 2096 P09 | X | 555    | 560    | 0.00275815  | 516    | 520    | -0.1380909  | 1277501 | -0.40292893 | 1190392 | -0.52646232 | experimental | Prestwick | 554 | Tolazamide                                |
| 2096 P10 | X | 474    | 480    | -0.31357461 | 474    | 480    | -0.1396886  | 2164147 | -0.96770639 | 2958977 | -0.83283235 | experimental | Prestwick | 634 | Riboflavin                                |
| 2096 P11 | X | 115    | 120    | -1.71559266 | 196    | 200    | -0.3617684  | 598898  | -1.45195667 | 550043  | -1.49489021 | experimental | Prestwick | 555 | Nifuroxazide                              |
| 2096 P12 | X | 434    | 440    | -0.46978833 | 515    | 520    | -0.10693582 | 1115715 | -0.65302755 | 1073478 | -0.70329292 | experimental | Prestwick | 635 | Hydroquinone hydrobromide hydrate         |
| 2096 P13 | X | 1516   | 1520   | 3.75579254  | 1195   | 1200   | 0.43628097  | 1221954 | -0.48879644 | 1195716 | -0.51840985 | experimental | Prestwick | 556 | Myophenolic acid                          |
| 2096 P14 | X | 354    | 360    | -0.78221575 | 714    | 720    | 0.05203498  | 1062890 | -0.73468785 | 1126367 | -0.62329914 | experimental | Prestwick |     |                                           |

|          |   |       |       |             |        |        |             |           |             |          |             |              |           |          |                                      |
|----------|---|-------|-------|-------------|--------|--------|-------------|-----------|-------------|----------|-------------|--------------|-----------|----------|--------------------------------------|
| 2097 A07 | X | 995   | 1000  | 2.07610866  | 674    | 680    | -0.0622339  | 1816201   | -0.25461035 | 1871876  | -0.52660028 | experimental | Prestwick | 643      | Flunisolide                          |
| 2097 A08 | X | 513   | 520   | 0.04832807  | 554    | 560    | -0.06929265 | 1726605   | -0.37437983 | 1987655  | -0.37944001 | experimental | Prestwick | 723      | Phenethicillin potassium salt        |
| 2097 A09 | X | 635   | 640   | 0.56158374  | 715    | 720    | -0.05982216 | 1817248   | -0.25231075 | 1900685  | -0.48998276 | experimental | Prestwick | 644      | N-Acetyl-DL-homocysteine Thiolactone |
| 2097 A10 | X | 515   | 520   | 0.0567421   | 635    | 640    | -0.06452799 | 1844950   | -0.21617948 | 2003193  | -0.35969052 | experimental | Prestwick | 724      | Sulfamethoxyypyridazine              |
| 2097 A11 | X | 474   | 480   | -0.11574546 | 553    | 560    | -0.06935747 | 1900327   | -0.14705302 | 1941701  | -0.06924662 | experimental | Prestwick | 645      | Flurandrenolide                      |
| 2097 A12 | X | 676   | 680   | 0.7340713   | 954    | 960    | -0.04576348 | 1753600   | -0.33829365 | 2096916  | -0.24056441 | experimental | Prestwick | 725      | Deferoxamine mesylate                |
| 2097 A13 | X | 555   | 560   | 0.22502264  | 954    | 960    | -0.04576348 | 1654257   | -0.47109265 | 1708218  | -0.7346169  | experimental | Prestwick | 646      | Helveticoside                        |
| 2097 A14 | X | 515   | 520   | 0.0567421   | 634    | 640    | -0.07399848 | 1820817   | -0.24843981 | 2100105  | -0.35101945 | experimental | Prestwick | 726      | Mephentermine hemisulfate            |
| 2097 A15 | X | 596   | 600   | 0.39751021  | 474    | 640    | -0.06458681 | 1858523   | -0.19803546 | 1980506  | -0.38852671 | experimental | Prestwick | 647      | Myosmine                             |
| 2097 A16 | X | 474   | 480   | -0.11574546 | 670    | 680    | -0.06246919 | 1896496   | -0.14727242 | 2282289  | -0.00494706 | experimental | Prestwick | 727      | Ergocryptine-alpha                   |
| 2097 A17 | X | 596   | 600   | 0.39751021  | 1194   | 1200   | -0.03164599 | 1878156   | -0.17179061 | 1989483  | -0.37711654 | experimental | Prestwick | 648      | Betonicine                           |
| 2097 A18 | X | 515   | 520   | 0.0567421   | 553    | 560    | -0.06935147 | 1868675   | -0.18448455 | 1992705  | -0.38613842 | experimental | Prestwick | 728      | Sulfadiazinone                       |
| 2097 A19 | X | 556   | 560   | 0.22922966  | 675    | 680    | -0.06217507 | 1865708   | -0.18843075 | 1961833  | -0.41226092 | experimental | Prestwick | 649      | Etanidazole                          |
| 2097 A20 | X | 509   | 520   | 0.03150001  | 0      | 440    | -0.10188053 | 1659649   | -0.46388478 | 2242624  | -0.05536304 | experimental | Prestwick | 729      | Sulfanilamide                        |
| 2097 A21 | X | 755   | 760   | 1.06642538  | 1154   | 1160   | -0.0339989  | 1683132   | -0.43249334 | 1926737  | -0.45686951 | experimental | Prestwick | 650      | Butirosin disulfate salt             |
| 2097 A22 | X | 396   | 400   | -0.44389253 | 553    | 560    | -0.06935147 | 1845903   | -0.21490553 | 1710536  | -0.73167062 | experimental | Prestwick | 730_2009 | Balsalazide Sodium                   |
| 2097 A23 | E | 142   | 400   | -1.51247401 | 238    | 600    | -0.08788068 | 1577449   | -0.57376748 | 1816228  | -0.59733137 | empty        |           |          |                                      |
| 2097 A24 | P | 88341 | 88480 | 369.541926  | 123794 | 124080 | 7.18004203  | 1538784   | -0.62545379 | 1545678  | -0.94121249 | empty        |           |          |                                      |
| 2097 B01 | N | 434   | 440   | -0.28402601 | 594    | 600    | -0.06693973 | 1666135   | -0.45521447 | 1805435  | -0.61104976 | empty        |           |          |                                      |
| 2097 B02 | E | 116   | 120   | -1.62185636 | 236    | 240    | -0.08799833 | 1892118   | -0.15312659 | 2270760  | -0.01960093 | empty        |           |          |                                      |
| 2097 B03 | X | 595   | 600   | 0.39330319  | 513    | 520    | -0.07170438 | 1797460   | -0.27966281 | 2090363  | -0.24889356 | experimental | Prestwick | 801      | Carbinoxamine maleate salt           |
| 2097 B04 | X | 554   | 560   | 0.22081563  | 552    | 560    | -0.06941029 | 2018633   | 0.01599519  | 2285716  | -0.00059119 | experimental | Prestwick | 881      | Niacin                               |
| 2097 B05 | X | 514   | 520   | 0.05253508  | 634    | 640    | -0.06458681 | 1960722   | -0.06141864 | 2228552  | -0.07324918 | experimental | Prestwick | 802      | Methazolamide                        |
| 2097 B06 | X | 354   | 360   | -0.62058711 | 512    | 520    | -0.07176321 | 2072596   | 0.08813145  | 2318580  | 0.04152326  | experimental | Prestwick | 882      | Bemegride                            |
| 2097 B07 | X | 712   | 720   | 0.88552379  | 794    | 800    | -0.05517515 | 2067133   | 0.08082866  | 2366035  | 0.10149784  | experimental | Prestwick | 803      | Pyritihedione                        |
| 2097 B08 | X | 713   | 720   | 0.88552379  | 593    | 600    | -0.06699855 | 1707455   | -0.4018006  | 1995844  | -0.23695504 | experimental | Prestwick | 883      | Xyloxygennin                         |
| 2097 B09 | X | 674   | 680   | 0.72565727  | 473    | 480    | -0.07405725 | 1039857   | 0.04436411  | 2276477  | -0.01233457 | experimental | Prestwick | 804      | Spesoxanone dihydrochloride          |
| 2097 B10 | X | 473   | 480   | -0.11995248 | 353    | 360    | -0.08111605 | 2055954   | 0.06588488  | 2318892  | 0.04157699  | experimental | Prestwick | 884      | Meglumine                            |
| 2097 B11 | X | 714   | 720   | 0.89393782  | 714    | 720    | -0.05988098 | 1992767   | -0.01858177 | 2232406  | -0.06835057 | experimental | Prestwick | 805      | Promidic acid                        |
| 2097 B12 | X | 273   | 280   | -0.96135521 | 632    | 640    | -0.06470446 | 1416653   | -0.78871517 | 1617560  | -0.84984726 | experimental | Prestwick | 885      | Cantharidin                          |
| 2097 B13 | X | 395   | 400   | -0.44809954 | 472    | 480    | -0.07411612 | 1731683   | -0.3675917  | 1980133  | -0.38900081 | experimental | Prestwick | 806      | Trimipramine maleate salt            |
| 2097 B14 | X | 395   | 400   | -0.44809954 | 433    | 440    | -0.07641022 | 2176159   | 0.22657163  | 1777103  | -0.13864315 | experimental | Prestwick | 886      | Clioquinol                           |
| 2097 B15 | X | 472   | 480   | -0.12415949 | 750    | 760    | -0.05776336 | 2267508   | 0.34866447  | 2035017  | -0.13192408 | experimental | Prestwick | 807      | Chloropyramine hydrochloride         |
| 2097 B16 | X | 395   | 400   | -0.44809954 | 674    | 680    | -0.06458681 | 1901259   | -0.14697322 | 2251091  | -0.27210358 | experimental | Prestwick | 887      | Proxiphetone                         |
| 2097 B17 | X | 393   | 400   | -0.45651357 | 708    | 720    | -0.06023392 | 1976336   | -0.04054628 | 2262002  | -0.03073274 | experimental | Prestwick | 808      | Furazolidone                         |
| 2097 B18 | X | 395   | 400   | -0.44809954 | 393    | 400    | -0.07876313 | 1740062   | -0.35639088 | 2003390  | -0.35944012 | experimental | Prestwick | 888      | Promethazine hydrochloride           |
| 2097 B19 | X | 430   | 440   | -0.30085407 | 0      | 800    | -0.10188053 | 1725206   | -0.37624998 | 2476642  | 0.24208427  | experimental | Prestwick | 809      | Dichlorphenamide                     |
| 2097 B20 | X | 2314  | 2320  | 7.62515971  | 304832 | 304840 | 17.82922229 | 1885358   | -0.16216317 | 1814949  | -0.59895704 | experimental | Prestwick | 889      | Chrysin                              |
| 2097 B21 | X | 869   | 880   | 1.54602494  | 71     | 960    | -0.09770411 | 1603631   | -0.53876811 | 1677163  | -0.77408919 | experimental | Prestwick | 810      | Sulconazole nitrate                  |
| 2097 B22 | X | 354   | 360   | -0.62058711 | 591    | 600    | -0.0671162  | 1766459   | -0.3211041  | 2003374  | -0.35946046 | experimental | Prestwick | 890      | Proxiphetone                         |
| 2097 B23 | E | 138   | 400   | -1.5293206  | 271    | 280    | -0.07641022 | 1564888   | -0.01705918 | 1871097  | -0.27210358 | empty        |           |          |                                      |
| 2097 B24 | P | 4732  | 47760 | 197.016502  | 97458  | 98080  | 5.63088204  | 1655022   | -0.47007002 | 1834823  | -0.57384758 | empty        |           |          |                                      |
| 2097 C01 | N | 517   | 520   | 0.06515612  | 517    | 520    | -0.07146909 | 1770698   | -0.31543752 | 1853202  | -0.55033577 | empty        |           |          |                                      |
| 2097 C02 | E | 76    | 80    | -1.79013691 | 35     | 40     | -0.09982173 | 1954682   | -0.06949275 | 1957621  | -0.41761456 | empty        |           |          |                                      |
| 2097 C03 | X | 635   | 640   | 0.56158374  | 674    | 680    | -0.0622339  | 1964089   | -0.05691773 | 2091624  | -0.24729078 | experimental | Prestwick | 651      | Glimepiride                          |
| 2097 C04 | X | 594   | 600   | 0.38909618  | 674    | 680    | -0.0622339  | 1781749   | -0.30066484 | 2213356  | -0.09256397 | experimental | Prestwick | 731      | Sulfaxoquinoline sodium salt         |
| 2097 C05 | X | 474   | 480   | -0.11574546 | 354    | 360    | -0.08105723 | 2080187   | 0.09927889  | 2142553  | -0.18255774 | experimental | Prestwick | 652      | Picrotoxinin                         |
| 2097 C06 | X | 440   | 440   | -0.28402601 | 433    | 440    | -0.07641022 | 1993906   | -0.01705918 | 2145162  | -0.18375328 | experimental | Prestwick | 732      | Treprozolinol                        |
| 2097 C07 | X | 554   | 560   | 0.22081563  | 394    | 400    | -0.07870431 | 102899107 | 0.0889107   | 2122260  | -0.20842732 | experimental | Prestwick | 653      | Meprozolate bromide                  |
| 2097 C08 | X | 473   | 480   | -0.11995248 | 434    | 440    | -0.07635139 | 2113559   | 0.14288967  | 2232306  | -0.08004418 | experimental | Prestwick | 733      | Metoprolol-(+,-)-tartrate salt       |
| 2097 C09 | X | 354   | 360   | -0.62058711 | 634    | 640    | -0.06458681 | 1998046   | -0.01152494 | 2212436  | -0.09373334 | experimental | Prestwick | 654      | Betnamine                            |
| 2097 C10 | X | 432   | 440   | -0.29244004 | 474    | 480    | -0.07399848 | 1971017   | -0.04765657 | 2277220  | -0.01138998 | experimental | Prestwick | 734      | Flumethasone                         |
| 2097 C11 | X | 754   | 760   | 1.06221837  | 474    | 480    | -0.07399848 | 2102073   | 0.1275355   | 2331372  | 0.05743963  | experimental | Prestwick | 655      | Halcinonide                          |
| 2097 C12 | X | 515   | 520   | 0.0567421   | 633    | 640    | -0.07641022 | 2047754   | 0.05492335  | 2146125  | -0.17801757 | experimental | Prestwick | 735      | Flonaidic acetate                    |
| 2097 C13 | X | 395   | 400   | -0.44809954 | 474    | 680    | -0.0622339  | 1851554   | -0.20735143 | 1869652  | -0.52947209 | experimental | Prestwick | 656      | Lanatoside C                         |
| 2097 C14 | X | 354   | 360   | -0.62058711 | 674    | 680    | -0.0622339  | 1901434   | -0.14067322 | 2510892  | 0.28561755  | experimental | Prestwick | 736      | Cefazolin sodium salt                |
| 2097 C15 | X | 915   | 920   | 1.73954757  | 674    | 680    | -0.0622339  | 1830315   | -0.23574315 | 2030740  | -0.32467705 | experimental | Prestwick | 657      | Benzamil hydrochloride               |
| 2097 C16 | X | 512   | 520   | 0.04412106  | 350    | 360    | -0.08129252 | 1947619   | -0.07893437 | 2329882  | 0.05554577  | experimental | Prestwick | 737      | Attractyliside potassium salt        |
| 2097 C17 | X | 355   | 360   | -0.61638009 | 474    | 720    | -0.05988098 | 1875899   | -0.1748077  | 2163211  | -0.15630051 | experimental | Prestwick | 658      | Sulixibuzone                         |
| 2097 C18 | X | 395   | 400   | -0.44809954 | 714    | 480    | -0.07399848 | 2021364   | 0.01964592  | 2235460  | -0.0644688  | experimental | Prestwick | 738      | Folic acid calcium salt              |
| 2097 C19 | X | 316   | 320   | -0.78045363 | 433    | 440    | -0.07641022 | 1901089   | -0.1411344  | 2396438  | 0.14014141  | experimental | Prestwick | 659      | Levononandrin                        |
| 2097 C20 | X | 310   | 320   | -0.80569571 | 0      | 640    | -0.10188053 | 2196586   | 0.25387789  | 2365130  | 0.10034755  | experimental | Prestwick | 739      | Levononandrin                        |
| 2097 C21 | X | 394   | 400   | -0.45230656 | 349    | 360    | -0.08135134 | 1734455   | -0.36386117 | 1871097  | -0.52759043 | experimental | Prestwick | 660      | Avermectin B1                        |
| 2097 C22 | X | 635   | 640   | 0.56158374  | 1113   | 1120   | -0.03641064 | 1680083   | -0.43656916 | 1816525  | -0.59695387 | experimental | Prestwick | 740      | Ebisenel                             |
| 2097 C23 | E | 185   | 360   | -1.33157242 | 173    | 440    | -0.09170417 | 1756196   | -0.33482339 | 2098389  | -0.23869216 | empty        |           |          |                                      |
| 2097 C24 | P | 58689 | 59000 | 244.795556  | 89518  | 90040  | 5.16382818  | 1826841   | -0.24038709 | 1994992  | -0.3712583  | empty        |           |          |                                      |
| 2097 D01 | N | 437   | 440   | -0.27140497 | 557    | 560    | -0.06911618 | 1759607   | -0.33026366 | 2013973  | -0.34598866 | empty        |           |          |                                      |
| 2097 D02 | E | 157   | 160   | -1.4493688  | 115    | 120    | -0.0951159  | 2173953   | 0.23622271  | 2311997  | 0.03281314  | empty        |           |          |                                      |
| 2097 D03 | X | 436   | 440   | -0.27561198 | 835    | 840    | -0.06276341 | 1931745   | -0.1001543  | 2269299  | -0.02145793 | experimental | Prestwick | 811      | Bergenin monohydrate                 |
| 2097 D04 | X | 440   | 440   | -0.28402601 | 553    | 560    | -0.06935147 | 2147643   | 0.18457262  | 21436150 | 0.19061714  | experimental | Prestwick | 891      | 7-Acetyloumarin                      |
| 2097 D05 | X | 474   | 480   | -0.11574546 | 353    | 360    | -0.08111605 | 2125571   | 0.16028322  | 2343015  | 0.0722384   | experimental | Prestwick | 812      | Chromolone disodium salt             |
| 2097 D06 | X | 515   | 520   | 0.0567421   | 1195   | 1200   | -0.03158716 | 11642497  | 12.8809127  | 11706164 | 11.9732184  | experimental | Prestwick | 892      | Esculin Hydrate                      |
| 2097 D07 | X | 474   | 480   | -0.11574546 | 553    | 560    | -0.06935147 | 2137176   | 0.17446023  | 2297024  | 0.01378179  | experimental | Prestwick | 813      | Bucadesine sodium salt               |
| 2097 D08 | X | 634   | 640   | 0.55737673  | 474    | 480    | -0.07399848 | 2272656   | 0.35556618  | 2437638  | 0.19250845  |              |           |          |                                      |



|          |   |       |       |             |        |        |             |          |             |         |             |              |           |          |                                         |
|----------|---|-------|-------|-------------|--------|--------|-------------|----------|-------------|---------|-------------|--------------|-----------|----------|-----------------------------------------|
| 2097 H19 | X | 475   | 480   | -0.11153845 | 831    | 840    | -0.0529987  | 2067538  | 0.08137006  | 2354261 | 0.08653256  | experimental | Prestwick | 839      | Ganciclovir                             |
| 2097 H20 | X | 474   | 480   | -0.11574546 | 710    | 720    | -0.06011627 | 1997155  | -0.01271601 | 2377428 | 0.11597886  | experimental | Prestwick | 919      | Bacitracin                              |
| 2097 H21 | X | 515   | 520   | 0.0567421   | 871    | 880    | -0.05064578 | 1735089  | -0.36303865 | 2352816 | 0.08469591  | experimental | Prestwick | 840      | Etifopazine hydrochloride               |
| 2097 H22 | X | 475   | 480   | -0.11153845 | 790    | 800    | -0.05541044 | 2010087  | 0.00457114  | 2493961 | 0.01243066  | experimental | Prestwick | 920      | L(-)-vesamicol hydrochloride            |
| 2097 H23 | E | 258   | 480   | -1.02446042 | 465    | 720    | -0.07452788 | 1781800  | -0.30059667 | 2042979 | -0.30912074 | empty        |           |          |                                         |
| 2097 H24 | P | 74951 | 75240 | 313.210012  | 85435  | 85960  | 4.92365426  | 1922038  | -0.11313035 | 2137135 | -0.18944426 | empty        |           |          |                                         |
| 2097 I01 | N | 557   | 560   | 0.23343667  | 994    | 1000   | -0.04341057 | 1921108  | -0.11437355 | 1967343 | -0.40525747 | empty        |           |          |                                         |
| 2097 I02 | E | 117   | 120   | -1.61764935 | 392    | 400    | -0.07882196 | 1899784  | -0.14287889 | 2172586 | -0.14438446 | empty        |           |          |                                         |
| 2097 I03 | X | 434   | 440   | -0.28402601 | 789    | 800    | -0.05546926 | 2007097  | 0.00057419  | 2203320 | -0.10532018 | experimental | Prestwick | 681      | Austricrine hydrate                     |
| 2097 I04 | X | 1115  | 1120  | 2.58095031  | 1671   | 1680   | -0.00358746 | 2033768  | 0.03622725  | 2286562 | 0.00048412  | experimental | Prestwick | 762      | Butamben                                |
| 2097 I05 | X | 393   | 400   | -0.45651357 | 670    | 680    | -0.06246919 | 2201391  | 0.26030108  | 2364102 | 0.09904091  | experimental | Prestwick | 681      | beta-Belladonnine dichloroethylate      |
| 2097 I06 | X | 433   | 440   | -0.28823302 | 588    | 600    | -0.06729267 | 2155036  | 0.19833498  | 2473266 | 0.23703006  | experimental | Prestwick | 762      | Sulfapyridine                           |
| 2097 I07 | X | 355   | 360   | -0.61638009 | 752    | 760    | -0.05764571 | 2103349  | 0.12942122  | 2231582 | -0.06939792 | experimental | Prestwick | 683      | Pempidine tartrate                      |
| 2097 I08 | X | 594   | 600   | 0.38909618  | 712    | 720    | -0.05998663 | 2121586  | 0.15361994  | 2500438 | 0.27233005  | experimental | Prestwick | 763      | Meclofenoxate hydrochloride             |
| 2097 I09 | X | 434   | 440   | -0.28402601 | 752    | 760    | -0.05764571 | 2104654  | 0.13098571  | 2256166 | -0.03815055 | experimental | Prestwick | 684      | Heliotrine                              |
| 2097 I10 | X | 476   | 480   | -0.10733144 | 752    | 760    | -0.05764571 | 1951359  | -0.07393484 | 2258376 | -0.03534155 | experimental | Prestwick | 764      | Furaltadone hydrochloride               |
| 2097 I11 | X | 355   | 360   | -0.61638009 | 913    | 920    | -0.04817522 | 2569132  | 0.75188716  | 2812694 | 0.66922135  | experimental | Prestwick | 685      | Nitratine dihydrochloride               |
| 2097 I12 | X | 315   | 320   | -0.78466064 | 629    | 640    | -0.06488093 | 2215527  | 0.27919769  | 2328055 | 0.05322357  | experimental | Prestwick | 765      | Ethoxyquin                              |
| 2097 I13 | X | 633   | 640   | 0.55316971  | 1151   | 1160   | -0.03417537 | 1669148  | -0.4518677  | 1841387 | -0.56535316 | experimental | Prestwick | 686      | Lycorine hydrochloride                  |
| 2097 I14 | X | 514   | 520   | 0.05253508  | 791    | 800    | -0.05535162 | 2124300  | 0.15724794  | 2271972 | -0.01806042 | experimental | Prestwick | 766      | Tinidazole                              |
| 2097 I15 | X | 395   | 400   | -0.44809954 | 792    | 800    | -0.05529279 | 2105535  | 0.1321634   | 2346207 | 0.07629557  | experimental | Prestwick | 687      | Karakolone                              |
| 2097 I16 | X | 434   | 440   | -0.28402601 | 591    | 600    | -0.0671162  | 2033528  | 0.03590642  | 2276184 | -0.01270678 | experimental | Prestwick | 767      | Guanadrel sulfate                       |
| 2097 I17 | X | 356   | 360   | -0.61217308 | 910    | 920    | -0.04835169 | 2014137  | 0.00998506  | 2365326 | 0.10059667  | experimental | Prestwick | 688      | Estropipate                             |
| 2097 I18 | X | 395   | 400   | -0.44809954 | 791    | 1160   | -0.03417537 | 2000025  | -0.00887947 | 2637065 | 0.44598906  | experimental | Prestwick | 768      | Vidarabine                              |
| 2097 I19 | X | 474   | 480   | -0.11574546 | 750    | 760    | -0.05776336 | 2067085  | 0.0807645   | 2306779 | 0.02618083  | experimental | Prestwick | 689      | Ungerine nitrate                        |
| 2097 I20 | X | 475   | 480   | -0.11574546 | 831    | 840    | -0.05249987 | 2099864  | 0.12294927  | 2249382 | 0.04767544  | experimental | Prestwick | 769      | Sulfamerazine                           |
| 2097 I21 | X | 313   | 320   | -0.79307467 | 909    | 920    | -0.04841051 | 1940756  | -0.08810864 | 2408524 | 0.15550326  | experimental | Prestwick | 690      | Napellacine                             |
| 2097 I22 | X | 395   | 400   | -0.44809954 | 712    | 720    | -0.05998663 | 1963002  | -0.05837008 | 2089341 | -0.25019257 | experimental | Prestwick | 770      | Isopropamide iodide                     |
| 2097 I23 | E | 161   | 320   | -1.43254075 | 316    | 560    | -0.0832925  | 1962403  | -0.05917153 | 2078046 | -0.26454902 | empty        |           |          |                                         |
| 2097 I24 | P | 53361 | 53720 | 222.380587  | 81385  | 81960  | 4.6854215   | 1913383  | -0.12470012 | 2064353 | -0.28195343 | empty        |           |          |                                         |
| 2097 J01 | N | 396   | 400   | -0.44389253 | 834    | 840    | -0.05282223 | 1571082  | -0.58227871 | 2079454 | -0.26275939 | empty        |           |          |                                         |
| 2097 J02 | E | 117   | 120   | -1.61764935 | 433    | 440    | -0.07641022 | 1860362  | -0.19557714 | 2572696 | 0.36417319  | empty        |           |          |                                         |
| 2097 J03 | X | 316   | 320   | -0.78045363 | 712    | 720    | -0.05998663 | 1866007  | -0.18803106 | 2209685 | -0.09722998 | experimental | Prestwick | 841      | Securinine                              |
| 2097 J04 | X | 314   | 320   | -0.78045363 | 709    | 720    | -0.06017537 | 1860175  | -0.18803106 | 2209685 | -0.09722998 | experimental | Prestwick | 842      | Nitrazidone                             |
| 2097 J05 | X | 355   | 360   | -0.61638009 | 511    | 520    | -0.07182203 | 1797679  | -0.27937006 | 2201585 | -0.10752544 | experimental | Prestwick | 922      | Trimiprazine tartrate                   |
| 2097 J06 | X | 392   | 400   | -0.46072059 | 950    | 960    | -0.04599878 | 1947702  | -0.07882342 | 2427691 | 0.17986537  | experimental | Prestwick | 922      | Thiopromazine maleate                   |
| 2097 J07 | X | 435   | 440   | -0.2798119  | 711    | 720    | -0.06005745 | 2260401  | 0.33918403  | 2482651 | 0.24972198  | experimental | Prestwick | 843      | Nafclillin sodium salt monohydrate      |
| 2097 J08 | X | 475   | 480   | -0.11153845 | 471    | 480    | -0.07417495 | 2263593  | 0.34345101  | 2759389 | 0.60146832  | experimental | Prestwick | 923      | Xamoterol hemifumarate                  |
| 2097 J09 | X | 436   | 440   | -0.27561198 | 673    | 680    | -0.06229272 | 1995469  | -0.01496891 | 2158519 | -0.16226425 | experimental | Prestwick | 844      | Procyclidine hydrochloride              |
| 2097 J10 | X | 355   | 360   | -0.61638009 | 593    | 600    | -0.06698955 | 2034041  | 0.03659219  | 2449717 | 0.2078614   | experimental | Prestwick | 924      | Rolipram                                |
| 2097 J11 | X | 394   | 400   | -0.45230656 | 430    | 440    | -0.28402601 | 22155915 | 0.15940683  | 2445212 | 0.26252545  | experimental | Prestwick | 845      | Altiprosone hydrochloride               |
| 2097 J12 | X | 435   | 440   | -0.2798119  | 753    | 760    | -0.05758689 | 1700517  | -0.40925355 | 1926661 | -0.45696611 | experimental | Prestwick | 925      | Nitrazidone bromide                     |
| 2097 J13 | X | 394   | 400   | -0.45230656 | 709    | 720    | -0.06017537 | 2042278  | 0.04760318  | 2261258 | -0.0316784  | experimental | Prestwick | 846      | Ethinylestradiol 3-methyl ether         |
| 2097 J14 | X | 395   | 400   | -0.44809954 | 632    | 640    | -0.06470446 | 2076376  | 0.09318445  | 2446523 | 0.20380168  | experimental | Prestwick | 926      | Idoxazon hydrochloride                  |
| 2097 J15 | X | 395   | 400   | -0.44809954 | 671    | 680    | -0.06241037 | 2043779  | 0.04960968  | 2168330 | -0.14979403 | experimental | Prestwick | 847      | (-)-Levonulolol hydrochloride           |
| 2097 J16 | X | 516   | 520   | 0.06094911  | 793    | 800    | -0.05523397 | 2126551  | 0.16025702  | 2501687 | 0.27391759  | experimental | Prestwick | 927_2009 | Quinapril HCl                           |
| 2097 J17 | X | 355   | 360   | -0.61638009 | 831    | 840    | -0.0529987  | 2124168  | 0.15707149  | 2456400 | 0.21635579  | experimental | Prestwick | 848      | Idoxianol                               |
| 2097 J18 | X | 356   | 360   | -0.61217308 | 710    | 720    | -0.06011627 | 2107032  | 0.08059163  | 2308551 | 0.20075743  | experimental | Prestwick | 928      | Nitrazidone                             |
| 2097 J19 | X | 435   | 440   | -0.2798119  | 711    | 720    | -0.06005745 | 2145007  | 0.18495523  | 2135308 | -0.10547186 | experimental | Prestwick | 849      | Rolisticycline                          |
| 2097 J20 | X | 553   | 560   | 0.21660862  | 869    | 880    | -0.05076343 | 2107373  | 0.13462039  | 2429552 | 0.18223078  | experimental | Prestwick | 929      | Ketorolac tromethamine                  |
| 2097 J21 | X | 915   | 920   | 1.73954757  | 1350   | 1360   | -0.02246961 | 1970469  | -0.04838912 | 2117048 | -0.21497574 | experimental | Prestwick | 850      | Equilin                                 |
| 2097 J22 | X | 473   | 480   | -0.11995248 | 630    | 640    | -0.0648221  | 1753727  | -0.33812388 | 1964423 | -0.40896892 | experimental | Prestwick | 930      | Protriptyline hydrochloride             |
| 2097 J23 | E | 216   | 360   | -1.20115499 | 429    | 760    | -0.07664551 | 1920553  | -0.11511546 | 2123687 | -0.20653727 | empty        |           |          |                                         |
| 2097 J24 | P | 48174 | 48480 | 200.558807  | 111594 | 112160 | 6.46240261  | 1881811  | -0.1669047  | 2333323 | 0.05991943  | empty        |           |          |                                         |
| 2097 K01 | N | 677   | 680   | 0.73827831  | 794    | 800    | -0.05517515 | 1893755  | -0.15093829 | 1894185 | -0.49824445 | empty        |           |          |                                         |
| 2097 K02 | E | 36    | 40    | -1.95841746 | 352    | 360    | -0.08117487 | 2101834  | 0.12721601  | 2117154 | -0.21484101 | empty        |           |          |                                         |
| 2097 K03 | X | 397   | 400   | -0.43968552 | 831    | 840    | -0.0529987  | 2008436  | 0.00236412  | 2169273 | -0.14859543 | experimental | Prestwick | 691      | Fillalbin                               |
| 2097 K04 | X | 395   | 400   | -0.44809954 | 711    | 720    | -0.06005745 | 2051087  | 0.05937881  | 2494481 | 0.26475844  | experimental | Prestwick | 771      | Alclometasone dipropionate              |
| 2097 K05 | X | 432   | 440   | -0.29244004 | 749    | 760    | -0.05782218 | 1981443  | -0.03371938 | 2308716 | -0.3145392  | experimental | Prestwick | 692_2009 | Citalopram Hydrobromide                 |
| 2097 K06 | X | 1595  | 1600  | 4.60031687  | 1630   | 1640   | -0.0059992  | 2043668  | 0.0494613   | 2325846 | 0.05041583  | experimental | Prestwick | 772      | Leflunomide                             |
| 2097 K07 | X | 512   | 520   | 0.04412106  | 868    | 880    | -0.05082225 | 1764650  | -0.32352232 | 1830763 | -0.57885674 | experimental | Prestwick | 693      | Promazine hydrochloride                 |
| 2097 K08 | X | 355   | 360   | -0.61638009 | 872    | 880    | -0.05058696 | 2157278  | 0.20133203  | 2508065 | 0.28202431  | experimental | Prestwick | 773      | Norgestrel-(1-)-D                       |
| 2097 K09 | X | 196   | 200   | -1.28529527 | 630    | 640    | -0.06470446 | 2001172  | -0.00734619 | 2148550 | -0.17493529 | experimental | Prestwick | 694      | Sulfamerazine                           |
| 2097 K10 | X | 275   | 280   | -0.95294119 | 631    | 640    | -0.06476328 | 2129477  | 0.16416841  | 2433559 | 0.18745096  | experimental | Prestwick | 774      | Fluocinonide                            |
| 2097 K11 | X | 875   | 880   | 1.57126702  | 1192   | 1200   | -0.03176363 | 1988235  | -0.02464002 | 2200268 | -0.36073913 | experimental | Prestwick | 695      | Acacetin                                |
| 2097 K12 | X | 474   | 480   | -0.11574546 | 628    | 640    | -0.06493975 | 2021278  | 0.01953096  | 2453407 | 0.21255155  | experimental | Prestwick | 775      | Sulfamethazine sodium salt              |
| 2097 K13 | X | 475   | 480   | -0.11153845 | 1112   | 1120   | -0.03646947 | 1945274  | -0.08206911 | 2130489 | -0.19789163 | experimental | Prestwick | 696      | Ethotoin                                |
| 2097 K14 | X | 354   | 360   | -0.62058711 | 589    | 600    | -0.06723384 | 2060956  | 0.07257142  | 2331214 | 0.0572388   | experimental | Prestwick | 776      | Guaifenesin                             |
| 2097 K15 | X | 356   | 360   | -0.61217308 | 750    | 760    | -0.05764571 | 1801328  | -0.27449217 | 2283647 | -0.00322098 | experimental | Prestwick | 697      | 3-alpha-Hydroxy-5-beta-androstan-17-one |
| 2097 K16 | X | 155   | 160   | -0.45778283 | 391    | 400    | -0.0788007  | 1102023  | -1.21173685 | 1914022 | -1.54452143 | experimental | Prestwick | 777      | Hexidine dihydrochloride                |
| 2097 K17 | X | 357   | 360   | -0.60796606 | 632    | 640    | -0.06470446 | 2064072  | 0.18495523  | 2203240 | -0.10547186 | experimental | Prestwick | 698      | Tetracycline hydrochloride              |
| 2097 K18 | X | 276   | 280   | -0.94873417 | 791    | 800    | -0.05535162 | 1926317  | -0.1074103  | 2056620 | -0.29178242 | experimental | Prestwick | 778      | Proadifen hydrochloride                 |
| 2097 K19 | X | 276   | 280   | -0.94873417 | 711    | 720    | -0.06005745 | 1573730  | -0.57873894 | 1743415 | -0.68987994 | experimental | Prestwick | 699      | Hexestrol                               |
| 2097 K20 | X | 315   | 320   | -0.78466064 | 749    | 760    | -0.05782218 | 1891829  | -0.15351292 |         |             |              |           |          |                                         |



|          |   |       |       |             |        |        |             |         |             |         |             |              |           |          |                                   |
|----------|---|-------|-------|-------------|--------|--------|-------------|---------|-------------|---------|-------------|--------------|-----------|----------|-----------------------------------|
| 2097 L13 | X | 595   | 600   | 0.39330319  | 948    | 960    | -0.04611642 | 2135104 | 0.17169043  | 2420296 | 0.17046599  | experimental | Prestwick | 856      | Tolmetin sodium salt dihydrate    |
| 2097 L14 | X | 675   | 680   | 0.72986429  | 1230   | 1240   | -0.02952836 | 2085124 | 0.10487854  | 2420503 | 0.1707291   | experimental | Prestwick | 856      | Benphenium hydroxynaphthoate      |
| 2097 L15 | X | 435   | 440   | -0.279819   | 989    | 1000   | -0.04370468 | 2005949 | -0.00156866 | 2118257 | -0.21343904 | experimental | Prestwick | 857      | (+)-Levobunolol hydrochloride     |
| 2097 L16 | X | 356   | 360   | -0.61217308 | 750    | 760    | -0.05776339 | 2085705 | -0.10585576 | 2289896 | 0.00346345  | experimental | Prestwick | 857      | Denhydroacetonacetone 3-acetate   |
| 2097 316 | P | 4633  | 4720  | -0.78043963 | 790    | 800    | -0.05541105 | 1951363 | -0.07383593 | 2245533 | -0.05166555 | experimental | Prestwick | 858      | Hexoxazin mesylate                |
| 2097 L18 | X | 357   | 360   | -0.60796606 | 1030   | 1040   | -0.04129294 | 2023374 | 0.02233283  | 2438844 | 0.19404133  | experimental | Prestwick | 938      | Benserazide hydrochloride         |
| 2097 L19 | X | 276   | 280   | -0.94873417 | 748    | 760    | -0.057881   | 2212158 | 0.27469411  | 2332731 | 0.05916697  | experimental | Prestwick | 859      | Fluvastatin sodium salt           |
| 2097 L20 | X | 275   | 280   | -0.95294119 | 1030   | 1040   | -0.04129294 | 1948641 | -0.07756819 | 2288133 | 0.00248093  | experimental | Prestwick | 939      | Iodipamide                        |
| 2097 L21 | X | 475   | 480   | -0.11153845 | 786    | 800    | -0.05564573 | 2030506 | 0.03186669  | 2444554 | 0.20129899  | experimental | Prestwick | 860      | Methylhydantoin-5-(L)             |
| 2097 L22 | X | 512   | 520   | 0.04412106  | 1346   | 1360   | -0.02270491 | 8866291 | 0.16975667  | 9872543 | 0.64260429  | experimental | Prestwick | 940      | Esculetin                         |
| 2097 L23 | E | 218   | 360   | -1.19274097 | 516    | 800    | -0.07152792 | 1960747 | -0.06138522 | 2392060 | 0.13457678  | empty        |           |          |                                   |
| 2097 L24 | P | 47633 | 47920 | 198.282815  | 94419  | 95040  | 5.4520604   | 1819605 | -0.25005998 | 1993438 | -0.3714032  | empty        |           |          |                                   |
| 2097 M01 | N | 437   | 440   | -0.27140497 | 1073   | 1080   | -0.03876356 | 1826161 | -0.2412961  | 1905072 | -0.48440669 | empty        |           |          |                                   |
| 2097 M02 | E | 117   | 120   | -1.61764935 | 470    | 480    | -0.07423377 | 1934740 | -0.09615067 | 2006533 | -0.35544523 | empty        |           |          |                                   |
| 2097 M03 | X | 276   | 280   | -0.94873417 | 870    | 880    | -0.05070461 | 1860226 | -0.19575894 | 2096395 | -0.24122662 | experimental | Prestwick | 701      | Trihexyphenidyl-D,L Hydrochloride |
| 2097 M04 | X | 475   | 480   | -0.11153845 | 910    | 920    | -0.04835169 | 1594220 | -0.55134847 | 2184981 | -0.12862986 | experimental | Prestwick | 781      | Clobetasol propionate             |
| 2097 M05 | X | 555   | 560   | 0.22502264  | 748    | 760    | -0.057881   | 2031992 | 0.03385314  | 2294525 | 0.01060544  | experimental | Prestwick | 702      | Succinylsulfathiazole             |
| 2097 M06 | X | 395   | 400   | -0.44809954 | 1070   | 1080   | -0.03894003 | 1862701 | -0.19245043 | 1988815 | -0.37795656 | experimental | Prestwick | 782      | Podophyllotoxin                   |
| 2097 M07 | X | 275   | 280   | -0.95294119 | 869    | 880    | -0.05076343 | 2083127 | 0.102209    | 2288469 | 0.0023908   | experimental | Prestwick | 703      | Famprofazone                      |
| 2097 M08 | X | 315   | 320   | -0.78466064 | 1070   | 1080   | -0.03894003 | 1922586 | -0.1123978  | 2067906 | -0.27743741 | experimental | Prestwick | 783      | Clofibrate                        |
| 2097 M09 | X | 396   | 400   | -0.44389253 | 910    | 920    | -0.04835169 | 2053870 | 0.06309905  | 2239395 | -0.05878088 | experimental | Prestwick | 704      | Bromopride                        |
| 2097 M10 | X | 276   | 280   | -0.94873417 | 830    | 840    | -0.05305752 | 1841982 | -0.22014702 | 2288681 | 0.00317746  | experimental | Prestwick | 784      | Bendroflumethiazide               |
| 2097 M11 | X | 316   | 320   | -0.78045363 | 830    | 840    | -0.05305752 | 1335914 | -0.89664485 | 1531241 | -0.95956256 | experimental | Prestwick | 705      | Methyl benzethonium chloride      |
| 2097 M12 | X | 316   | 320   | -0.78045363 | 869    | 1000   | -0.04370468 | 1863089 | -0.19193176 | 2068305 | -0.27693026 | experimental | Prestwick | 785      | Dicumarol                         |
| 2097 M13 | X | 435   | 440   | -0.279819   | 989    | 880    | -0.05076343 | 1610339 | -0.52980103 | 1801059 | -0.61661185 | experimental | Prestwick | 706_2009 | Chlorcyclizine hydrochloride      |
| 2097 M14 | X | 280   | 440   | -0.95714465 | 939    | 820    | -0.05113105 | 1955160 | -0.06885377 | 2242422 | -0.07948639 | experimental | Prestwick | 786      | Salmeterol                        |
| 2097 M15 | X | 395   | 400   | -0.44809954 | 909    | 920    | -0.04811051 | 1912222 | -0.12678111 | 2243881 | -0.08172832 | experimental | Prestwick | 707      | Diphenhydraline hydrochloride     |
| 2097 M16 | X | 436   | 440   | -0.27561198 | 1109   | 1120   | -0.03664593 | 1785472 | -0.29568804 | 1997768 | -0.36658594 | experimental | Prestwick | 787      | Merbromin                         |
| 2097 M17 | X | 356   | 360   | -0.61217308 | 989    | 1000   | -0.04370468 | 1552407 | -0.60724294 | 1576852 | -0.90158894 | experimental | Prestwick | 708      | Benzethonium chloride             |
| 2097 M18 | X | 275   | 280   | -0.95294119 | 988    | 1000   | -0.04376351 | 1887445 | -0.15937333 | 2428563 | 0.18097372  | experimental | Prestwick | 788      | Hexylcaine hydrochloride          |
| 2097 M19 | X | 475   | 480   | -0.11153845 | 1230   | 1240   | -0.02952836 | 2075761 | 0.09236234  | 2329947 | 0.05562839  | experimental | Prestwick | 709      | Trioxsalen                        |
| 2097 M20 | X | 475   | 480   | -0.11153845 | 987    | 1000   | -0.04382233 | 1795733 | -0.28197142 | 2165308 | -0.15363512 | experimental | Prestwick | 789      | Drofenine hydrochloride           |
| 2097 M21 | X | 589   | 600   | 0.36806111  | 1262   | 1280   | -0.02764603 | 1613023 | -0.52621313 | 1916313 | -0.47011887 | experimental | Prestwick | 710      | Strophantidin                     |
| 2097 M22 | E | 1240  | 1240  | 3.08571466  | 2347   | 2400   | -0.05076343 | 2499072 | -0.07805283 | 2301438 | -0.70868435 | experimental | Prestwick | 790      | Cycloheximide                     |
| 2097 M23 | E | 218   | 360   | -1.19274097 | 535    | 840    | -0.07041028 | 1963676 | -0.05746982 | 2212187 | -0.09404983 | empty        |           |          |                                   |
| 2097 M24 | P | 46673 | 46960 | 194.24408   | 100668 | 101240 | 5.81970356  | 1861599 | -0.19392355 | 2172934 | -0.14394214 | empty        |           |          |                                   |
| 2097 N01 | N | 597   | 600   | 0.40171722  | 871    | 880    | -0.05064578 | 1405380 | -0.8037846  | 1923517 | -0.46096227 | empty        |           |          |                                   |
| 2097 N02 | E | 156   | 160   | -1.45357581 | 712    | 720    | -0.05999863 | 1668884 | -0.45153968 | 2202869 | -0.10589342 | empty        |           |          |                                   |
| 2097 N03 | X | 517   | 520   | 0.06515612  | 909    | 920    | -0.04841051 | 1837301 | -0.22640445 | 2150301 | -0.17270969 | experimental | Prestwick | 861      | Gabapentin                        |
| 2097 N04 | X | 313   | 320   | -0.79307467 | 828    | 840    | -0.05317517 | 1799375 | -0.27710289 | 2178683 | -0.1366349  | experimental | Prestwick | 941      | Pentetic acid                     |
| 2097 N05 | X | 480   | 480   | 0.72565727  | 1149   | 1149   | 0.04382233  | 1489585 | -0.6912167  | 1821811 | -0.02740466 | experimental | Prestwick | 862      | Salicylic acid hydrochloride      |
| 2097 N06 | X | 674   | 680   | -0.1153845  | 908    | 920    | -0.04846934 | 2025223 | 0.02480453  | 2180588 | -0.13421356 | experimental | Prestwick | 863      | Bretylium mesylate                |
| 2097 N07 | X | 435   | 440   | -0.279819   | 870    | 880    | -0.05070461 | 2001451 | -0.00697323 | 2305170 | 0.02413571  | experimental | Prestwick | 863      | Etidronic acid, disodium salt     |
| 2097 N08 | X | 435   | 440   | -0.279819   | 989    | 1000   | -0.04370468 | 2037144 | 0.04074019  | 2252902 | -0.04229924 | experimental | Prestwick | 943      | Priloxime chloride                |
| 2097 N09 | X | 475   | 480   | -0.11153845 | 909    | 920    | -0.04841051 | 2088116 | 0.10887816  | 2193587 | -0.11769125 | experimental | Prestwick | 864      | Methylhydantoin-5-(D)             |
| 2097 N10 | X | 395   | 400   | -0.44809954 | 950    | 960    | -0.04599878 | 1989565 | -0.02286211 | 2269494 | -0.02121007 | experimental | Prestwick | 944      | Phenoxybenzamine hydrochloride    |
| 2097 N11 | X | 475   | 480   | -0.11153845 | 709    | 720    | -0.0601751  | 1966730 | -0.0538731  | 2134770 | -0.19245003 | experimental | Prestwick | 865      | Simvastatin                       |
| 2097 N12 | X | 475   | 480   | -0.11153845 | 987    | 1000   | -0.04382233 | 1671659 | -0.44783014 | 1941467 | -0.40864353 | experimental | Prestwick | 945_2009 | Salmeterol                        |
| 2097 N13 | X | 514   | 520   | 0.05253508  | 1069   | 1080   | -0.03899885 | 4922515 | -0.68730492 | 1604254 | -0.86675977 | experimental | Prestwick | 866      | Acetylcysteine-5                  |
| 2097 N14 | X | 475   | 480   | -0.11153845 | 790    | 800    | -0.05541044 | 2071633 | 0.08684414  | 2346893 | 0.07716751  | experimental | Prestwick | 946      | Altretamine                       |
| 2097 N15 | X | 395   | 400   | -0.44809954 | 829    | 840    | -0.05311635 | 1975434 | -0.04175205 | 2092839 | -0.24574646 | experimental | Prestwick | 867      | Paromomycin sulfate               |
| 2097 N16 | X | 315   | 320   | -0.78466064 | 989    | 1000   | -0.04370468 | 2092487 | -0.1147212  | 2375487 | 0.11351176  | experimental | Prestwick | 947      | Prazosin hydrochloride            |
| 2097 N17 | X | 435   | 440   | -0.279819   | 1028   | 1040   | -0.04141059 | 1910618 | -0.1283963  | 2518909 | -0.29580752 | experimental | Prestwick | 868      | Acetaminophen                     |
| 2097 N18 | X | 475   | 480   | -0.11153845 | 890    | 1000   | -0.04364586 | 1924738 | -0.10952107 | 2336424 | 0.06386094  | experimental | Prestwick | 948      | Timolol maleate salt              |
| 2097 N19 | X | 555   | 560   | 0.22502264  | 927    | 840    | -0.05323399 | 1896003 | -0.14793323 | 2209274 | -0.09775238 | experimental | Prestwick | 869      | Phthalylsulfathiazole             |
| 2097 N20 | X | 231   | 240   | -1.13804979 | 946    | 960    | -0.04623407 | 2027687 | 0.02808933  | 2301438 | 0.01939218  | experimental | Prestwick | 949      | (+)-Octopamine hydrochloride      |
| 2097 N21 | X | 1475  | 1480  | 0.09547523  | 2029   | 2040   | 0.01747114  | 1564900 | -0.59054264 | 1698528 | -0.74693332 | experimental | Prestwick | 870      | Luteolin                          |
| 2097 N22 | X | 350   | 360   | -0.63741516 | 902    | 920    | -0.04882227 | 1971920 | -0.04644946 | 2150525 | -0.17242498 | experimental | Prestwick | 950      | (S)-Nipeptic acid                 |
| 2097 N23 | E | 209   | 360   | -1.23060409 | 617    | 920    | -0.06558668 | 1716701 | -0.38761923 | 2031155 | -0.32414957 | empty        |           |          |                                   |
| 2097 N24 | P | 50614 | 50960 | 210.82392   | 101147 | 101760 | 5.84787973  | 1852258 | -0.20641034 | 2091454 | -0.24750685 | empty        |           |          |                                   |
| 2097 O01 | N | 596   | 600   | 0.39751021  | 1433   | 1440   | -0.01758731 | 1674090 | -0.44458044 | 1757994 | -0.67134938 | empty        |           |          |                                   |
| 2097 O02 | E | 116   | 120   | -1.62185636 | 549    | 560    | -0.06958676 | 1792564 | -0.28620765 | 1795357 | -0.62385934 | empty        |           |          |                                   |
| 2097 O03 | X | 435   | 440   | -0.279819   | 989    | 1240   | -0.02952836 | 1835015 | -0.22946031 | 1817983 | -0.59510069 | experimental | Prestwick | 711      | Sulfabenzamide                    |
| 2097 O04 | X | 674   | 680   | 0.72565727  | 988    | 1000   | -0.04376351 | 1790424 | -0.28906834 | 2192740 | -0.11876783 | experimental | Prestwick | 791      | (R)-Naproxen sodium salt          |
| 2097 O05 | X | 673   | 680   | 0.72145026  | 1227   | 1240   | -0.02970483 | 1797713 | -0.27932461 | 2153497 | -0.16864743 | experimental | Prestwick | 712      | Benzocaine                        |
| 2097 O06 | X | 434   | 440   | -0.28402601 | 1108   | 1120   | -0.03670476 | 1885126 | -0.1624733  | 2004978 | -0.35742171 | experimental | Prestwick | 792      | Propidium iodide                  |
| 2097 O07 | X | 353   | 360   | -0.61638009 | 749    | 760    | -0.05782218 | 1783746 | -0.29799531 | 2026981 | -0.32945491 | experimental | Prestwick | 713      | Dipyron                           |
| 2097 O08 | X | 353   | 360   | -0.62479412 | 829    | 840    | -0.05311635 | 1642242 | -0.48715398 | 2027466 | -0.32883845 | experimental | Prestwick | 793      | Cloperastine hydrochloride        |
| 2097 O09 | X | 554   | 560   | 0.22081563  | 1030   | 1040   | -0.04129294 | 1522167 | -0.64766694 | 2062112 | -0.28480184 | experimental | Prestwick | 714      | Isosorbide dinitrate              |
| 2097 O10 | X | 594   | 600   | 0.38909618  | 908    | 920    | -0.04846934 | 1762855 | -0.32592182 | 2202402 | -0.33425319 | experimental | Prestwick | 794      | Eucastropine hydrochloride        |
| 2097 O11 | X | 434   | 440   | -0.28402601 | 909    | 920    | -0.04841051 | 1672812 | -0.44088884 | 1954555 | -0.42151159 | experimental | Prestwick | 715      | Sulfachloropyridazine             |
| 2097 O12 | X | 594   | 600   | 0.38909618  | 1508   | 1520   | -0.01317556 | 1759756 | -0.33066448 | 2189352 | -0.12307411 | experimental | Prestwick | 795      | Isocarboxazid                     |
| 2097 O13 | X | 594   | 600   | 0.38909618  | 1106   | 1120   | -0.03682224 | 1691159 | -0.42176307 | 2092855 | -0.2460693  | experimental | Prestwick | 716      | Pramoxine hydrochloride           |
| 2097 O14 | X | 354   | 360   | -0.62058711 | 829    |        |             |         |             |         |             |              |           |          |                                   |





|          |   |        |        |             |        |        |             |          |             |         |             |              |           |      |                               |
|----------|---|--------|--------|-------------|--------|--------|-------------|----------|-------------|---------|-------------|--------------|-----------|------|-------------------------------|
| 2098 G19 | X | 873    | 880    | 0.47435536  | 552    | 560    | -0.60852832 | 2290661  | 0.07393589  | 2172109 | -0.31929506 | experimental | Prestwick | 999  | Proguanil hydrochloride       |
| 2098 G20 | X | 673    | 680    | 0.04906758  | 512    | 520    | -0.81212397 | 2188440  | -0.0421734  | 2388521 | -0.06114921 | empty        |           |      |                               |
| 2098 G21 | X | 671    | 680    | 0.0448147   | 991    | 1000   | 1.62593396  | 2009056  | -0.24592946 | 2347963 | -0.1095286  | experimental |           | 1000 | Lymecycline                   |
| 2098 G22 | X | 792    | 800    | 0.30211381  | 752    | 760    | 0.40944994  | 2144943  | -0.09158013 | 2272324 | -0.1515116  | empty        |           |      |                               |
| 2098 G23 | E | 320    | 600    | -0.70156536 | 368    | 640    | -1.54506832 | 2160102  | -0.07436155 | 2304765 | -0.16105709 | empty        |           |      |                               |
| 2098 G24 | P | 94318  | 94840  | 199.179439  | 91537  | 92120  | 462.495231  | 2141724  | -0.09523648 | 2347664 | -0.10988526 | empty        |           |      |                               |
| 2098 H01 | N | 593    | 600    | -0.12104753 | 913    | 920    | 1.22892244  | 2021656  | -0.23161756 | 2200383 | -0.28556858 | empty        |           |      |                               |
| 2098 H02 | E | 275    | 280    | -0.79725511 | 233    | 240    | -2.23220364 | 2264459  | 0.04417395  | 2432592 | -0.00857936 | empty        |           |      |                               |
| 2098 H03 | E | 634    | 640    | -0.03386354 | 792    | 800    | 0.61304559  | 2200543  | -0.02842602 | 2633792 | 0.23142094  | experimental | Prestwick | 1071 | Imidurea                      |
| 2098 H04 | E | 587    | 600    | -0.13380617 | 828    | 840    | 0.79628168  | 2254439  | 0.03279258  | 2514942 | 0.08965138  | empty        |           |      |                               |
| 2098 H05 | E | 2712   | 2720   | 4.38487651  | 2192   | 2200   | 7.73889341  | 2245654  | 0.022814    | 2584827 | 0.17301331  | experimental | Prestwick | 1072 | Lansoprazole                  |
| 2098 H06 | E | 507    | 520    | -0.30392124 | 707    | 720    | 0.18044983  | 2322508  | 0.1101099   | 2370817 | -0.08228733 | empty        |           |      |                               |
| 2098 H07 | E | 633    | 640    | -0.03598998 | 911    | 920    | 1.21874266  | 2352845  | 0.14456854  | 2575605 | 0.1620129   | experimental | Prestwick | 1073 | Bethanechol chloride          |
| 2098 H08 | E | 354    | 360    | -0.62926643 | 511    | 520    | -0.81721386 | 2385096  | 0.18120134  | 2439952 | 0.00019997  | empty        |           |      |                               |
| 2098 H09 | E | 554    | 560    | -0.20397865 | 552    | 560    | -0.60852832 | 2346098  | 0.13690486  | 2702096 | 0.31289699  | experimental | Prestwick | 1074 | Cyproterone acetate           |
| 2098 H10 | E | 554    | 560    | -0.20397865 | 594    | 600    | -0.39475288 | 2320031  | 0.10729626  | 2772621 | 0.39702234  | empty        |           |      |                               |
| 2098 H11 | E | 434    | 440    | -0.45915132 | 472    | 480    | -1.01571962 | 2179937  | -0.05183166 | 2456345 | 0.01975427  | experimental | Prestwick | 1075 | (R)-Propranolol hydrochloride |
| 2098 H12 | E | 473    | 480    | -0.3762202  | 672    | 680    | 0.00225864  | 2366203  | 0.15974143  | 2614549 | 0.20846704  | empty        |           |      |                               |
| 2098 H13 | E | 834    | 840    | 0.39142424  | 554    | 560    | -0.59834853 | 2215704  | -0.01120516 | 2370817 | -0.08228733 | empty        |           |      |                               |
| 2098 H14 | E | 512    | 520    | -0.29328909 | 393    | 400    | -1.41782103 | 2350002  | 0.14133928  | 2668307 | 0.27259197  | empty        |           |      |                               |
| 2098 H15 | E | 634    | 640    | -0.03386354 | 591    | 600    | -0.41002256 | 2191222  | -0.03901342 | 2387878 | -0.06191621 | experimental | Prestwick | 1076 | Tropine                       |
| 2098 H16 | E | 593    | 600    | -0.12104753 | 1513   | 1520   | 4.28285722  | 2340076  | 0.13006468  | 2362530 | -0.09215243 | empty        |           |      |                               |
| 2098 H17 | E | 552    | 560    | -0.20823153 | 711    | 720    | 0.2007644   | 2300074  | 0.0846278   | 2292039 | -0.17623723 | experimental | Prestwick | 1078 | Benzylpenicillin sodium       |
| 2098 H18 | E | 473    | 480    | -0.3762202  | 811    | 820    | -1.83519212 | 2259802  | 0.03800664  | 2360460 | -0.09462162 | empty        |           |      |                               |
| 2098 H19 | E | 673    | 680    | 0.04906758  | 334    | 340    | 0.82682103  | 2292770  | 0.07633143  | 2552220 | 0.13411823  | experimental | Prestwick | 1079 | Chlorambucil                  |
| 2098 H20 | E | 440    | 440    | -0.46553064 | 954    | 960    | -0.91361821 | 2157160  | 0.1040237   | 2453839 | -0.07680907 | empty        |           |      |                               |
| 2098 H21 | E | 993    | 1000   | 0.72952803  | 1031   | 1040   | 1.82952962  | 2296862  | -0.07483861 | 2252458 | -0.2234512  | experimental | Prestwick | 1080 | Methiazole                    |
| 2098 H22 | E | 671    | 680    | 0.0448147   | 751    | 760    | 0.40436005  | 2197742  | -0.03160758 | 2314465 | -0.1494865  | empty        |           |      |                               |
| 2098 H23 | E | 248    | 480    | -0.8546896  | 270    | 600    | -2.04387766 | 2068896  | -0.17795928 | 2104333 | -0.40014129 | empty        |           |      |                               |
| 2098 H24 | P | 77787  | 78360  | 164.027278  | 111237 | 111760 | 562.76609   | 2100804  | -0.14171609 | 2202374 | -0.28319363 | empty        |           |      |                               |
| 2098 I01 | N | 1236   | 1240   | 1.24625268  | 1553   | 1560   | 4.48645287  | 1883870  | -0.3881239  | 2794876 | 0.4235691   | empty        |           |      |                               |
| 2098 I02 | E | 193    | 200    | -0.9716231  | 311    | 320    | -1.83519212 | 2182785  | -0.04859671 | 2873306 | 0.51712389  | empty        |           |      |                               |
| 2098 I03 | X | 634    | 640    | -0.03386354 | 832    | 840    | 0.81664125  | 2029524  | -0.22268057 | 2629872 | 0.22674499  | experimental | Prestwick | 1001 | Alfadolone acetate            |
| 2098 I04 | X | 730    | 740    | 0.13199887  | 551    | 560    | -0.91361821 | 2147339  | 0.0888829   | 2506029 | 0.08228733  | empty        |           |      |                               |
| 2098 I05 | X | 745    | 760    | 0.20217118  | 508    | 520    | -0.83248353 | 2306241  | 0.09163268  | 2581705 | 0.16928925  | experimental | Prestwick | 1002 | Alfaxalone                    |
| 2098 I06 | X | 791    | 800    | 0.2998737   | 791    | 800    | 0.6079557   | 2184174  | -0.047019   | 2459091 | 0.02302982  | empty        |           |      |                               |
| 2098 I07 | X | 1033   | 1040   | 0.81458558  | 1111   | 1120   | 2.23672092  | 2261406  | 0.04070615  | 2527303 | 0.10439613  | experimental | Prestwick | 1003 | Azapropazone                  |
| 2098 I08 | X | 552    | 560    | -0.20823153 | 830    | 840    | 0.80646146  | 2176082  | -0.05621042 | 2382310 | -0.06855797 | empty        |           |      |                               |
| 2098 I09 | X | 633    | 640    | -0.03598998 | 873    | 880    | 1.02532679  | 2166527  | -0.06706361 | 2370892 | -0.08217786 | experimental | Prestwick | 1004 | Meptazinol hydrochloride      |
| 2098 I10 | X | 553    | 560    | -0.20610509 | 592    | 600    | -0.40493266 | 2281633  | 0.06368113  | 2276601 | -0.19465236 | empty        |           |      |                               |
| 2098 I11 | X | 634    | 640    | -0.03386354 | 673    | 680    | 0.07348523  | 21413036 | 0.21293741  | 2640364 | 0.19840003  | experimental | Prestwick | 1005 | Apramycin                     |
| 2098 I12 | X | 514    | 520    | -0.28903621 | 712    | 720    | 0.20585429  | 2260531  | 0.03971227  | 2598950 | 0.18985986  | empty        |           |      |                               |
| 2098 I13 | X | 434    | 440    | -0.45915132 | 593    | 600    | -0.39984277 | 2245008  | 0.02208023  | 2454682 | 0.01777057  | experimental | Prestwick | 1006 | Epitiostanol                  |
| 2098 I14 | X | 394    | 400    | -0.54420888 | 593    | 600    | -0.39984277 | 2208314  | -0.01959921 | 2522224 | 0.09833767  | empty        |           |      |                               |
| 2098 I15 | X | 554    | 560    | -0.20397865 | 673    | 680    | 0.00734853  | 2300769  | 0.08541722  | 2735016 | 0.37363663  | experimental | Prestwick | 1007 | Fursultiamine Hydrochloride   |
| 2098 I16 | X | 672    | 680    | 0.04694114  | 590    | 600    | -0.41511245 | 2502258  | 0.31428159  | 2521217 | 0.09713648  | empty        |           |      |                               |
| 2098 I17 | X | 673    | 680    | 0.04906758  | 632    | 640    | -0.20133701 | 2393511  | 0.19035073  | 2364737 | -0.08951982 | experimental | Prestwick | 1008 | Gabaxete mesilate             |
| 2098 I18 | X | 792    | 800    | 0.30424025  | 954    | 960    | -0.91361821 | 2235292  | 0.0040679   | 2228831 | -0.25163456 | empty        |           |      |                               |
| 2098 I19 | X | 513    | 520    | -0.29116265 | 631    | 640    | -0.19624712 | 2289818  | 0.07297836  | 2451651 | 0.01415506  | experimental | Prestwick | 1009 | Flivampicillin                |
| 2098 I20 | X | 634    | 640    | -0.03386354 | 713    | 720    | 0.21094418  | 2164910  | -0.06890031 | 2572797 | 0.15866339  | empty        |           |      |                               |
| 2098 I21 | X | 552    | 560    | -0.20823153 | 711    | 720    | 0.2007644   | 2322168  | 0.1097236   | 2562424 | 0.14629002  | experimental | Prestwick | 1010 | Talampicillin hydrochloride   |
| 2098 I22 | X | 713    | 720    | 0.13412513  | 752    | 760    | 0.40944994  | 2287794  | 0.07067937  | 2397343 | -0.05062594 | empty        |           |      |                               |
| 2098 I23 | E | 177    | 480    | -1.00564612 | 420    | 680    | -1.28039397 | 2151235  | -0.08443326 | 2201601 | -0.28411569 | empty        |           |      |                               |
| 2098 I24 | P | 102196 | 102680 | 215.931525  | 87414  | 88000  | 441.50961   | 2226675  | 0.00125642  | 2483367 | 0.05198732  | empty        |           |      |                               |
| 2098 J01 | N | 594    | 600    | -0.1189211  | 1032   | 1040   | 1.83461951  | 1937982  | -0.32665995 | 2223829 | -0.25760115 | empty        |           |      |                               |
| 2098 J02 | E | 235    | 240    | -0.88231266 | 312    | 320    | -1.83010223 | 2403224  | 0.2017923   | 2506029 | 0.07901956  | empty        |           |      |                               |
| 2098 J03 | E | 674    | 680    | 0.05119402  | 1072   | 1080   | 2.03821516  | 2113324  | -0.12749506 | 2372589 | -0.08015361 | experimental | Prestwick | 1081 | (S)-propranolol hydrochloride |
| 2098 J04 | E | 711    | 720    | 0.12987226  | 872    | 880    | 1.0202369   | 2399510  | 0.1975737   | 2464320 | 0.02926721  | empty        |           |      |                               |
| 2098 J05 | E | 872    | 880    | 0.47222892  | 512    | 520    | -0.81212397 | 2008112  | -0.24700172 | 2265450 | -0.20795377 | experimental | Prestwick | 1082 | (-)-Eseroline fumarate salt   |
| 2098 J06 | E | 672    | 680    | 0.04694114  | 592    | 600    | -0.40493266 | 2535903  | 0.35249778  | 2332084 | -0.12846977 | empty        |           |      |                               |
| 2098 J07 | E | 432    | 440    | -0.4634042  | 671    | 680    | -0.00283125 | 2203279  | -0.02531829 | 2670166 | 0.27480947  | experimental | Prestwick | 1083 | Condolphine                   |
| 2098 J08 | E | 553    | 560    | -0.20610509 | 792    | 800    | 0.61304559  | 2588535  | 0.41228064  | 2662906 | 0.26614942  | empty        |           |      |                               |
| 2098 J09 | E | 793    | 800    | 0.30424025  | 954    | 960    | -0.91361821 | 2235292  | 0.0040679   | 2228831 | -0.25163456 | experimental | Prestwick | 1084 | Leucamisine                   |
| 2098 J10 | E | 552    | 560    | -0.20823153 | 513    | 520    | -0.80703408 | 2508531  | 0.32140687  | 2374081 | -0.07837388 | empty        |           |      |                               |
| 2098 J11 | E | 633    | 640    | -0.03598998 | 633    | 640    | -0.19624712 | 2305977  | 0.09133281  | 2577927 | 0.16478269  | experimental | Prestwick | 1085 | Dubininine                    |
| 2098 J12 | E | 554    | 560    | -0.20397865 | 632    | 640    | -0.20133701 | 2579123  | 0.40158988  | 2563214 | 0.14723237  | empty        |           |      |                               |
| 2098 J13 | E | 474    | 480    | -0.37409376 | 673    | 680    | 0.00734853  | 2188897  | -0.0416543  | 2338364 | -0.12097871 | experimental | Prestwick | 1086 | D-cycloserine                 |
| 2098 J14 | E | 515    | 520    | -0.28690977 | 633    | 640    | -0.19624712 | 2328540  | 0.11696134  | 2419661 | -0.02400403 | empty        |           |      |                               |
| 2098 J15 | E | 433    | 440    | -0.46127776 | 512    | 520    | -0.81212397 | 2355808  | 0.14793411  | 2402277 | -0.04474044 | experimental | Prestwick | 1087 | 2-Chloropyrazine              |
| 2098 J16 | E | 754    | 760    | 0.22130613  | 834    | 840    | 1.19115723  | 2365684  | 0.1515192   | 2755661 | -0.19589411 | empty        |           |      |                               |
| 2098 J17 | E | 513    | 520    | -0.29116265 | 632    | 640    | -0.20133701 | 2258637  | 0.03756094  | 2329390 | -0.12571907 | experimental | Prestwick | 1088 | (+,-)-Synephrine              |
| 2098 J18 | E | 554    | 560    | -0.20397865 | 711    | 720    | 0.2007644   | 2368536  | 0.16239141  | 2510057 | 0.08382433  | empty        |           |      |                               |
| 2098 J19 | E | 474    | 480    | -0.37409376 | 712    | 720    | 0.20585429  | 1981620  | -0.27709306 | 2466166 | 0.0314692   | experimental | Prestwick | 1089 | (S)-(-)-Cycloserine           |
| 2098 J20 | E | 474    | 480    | -0.37409376 | 632    | 640    | -0.20133701 | 2363953  | 0.15718574  | 2399131 | -0.04849313 | empty        |           |      |                               |
| 2098 J21 | E | 554    | 560    | -0.20397865 | 512    | 520    | -0.81212397 | 2308372  | 0.09405321  | 2378938 | -0.07258024 | experimental | Prestwick | 1090 | Homosalate                    |
| 2098 J22 | E | 633    | 640    | -0.03598998 | 713    | 720    | 0.21094418  | 2219655  | -0.00671736 | 2369671 | -0.08363433 | empty        |           |      |                               |
| 2098 J23 | E | 419    | 680    | -0.49147    |        |        |             |          |             |         |             |              |           |      |                               |

|          |   |        |        |             |       |       |             |         |             |          |             |              |           |           |                                 |
|----------|---|--------|--------|-------------|-------|-------|-------------|---------|-------------|----------|-------------|--------------|-----------|-----------|---------------------------------|
| 2098 K13 | X | 394    | 400    | -0.54420888 | 632   | 640   | -0.20133701 | 2287481 | 0.07032384  | 2341316  | -0.11745743 | experimental | Prestwick | 1016      | Moxonidine                      |
| 2098 K14 | X | 555    | 560    | -0.20185221 | 552   | 560   | -0.60852832 | 2426728 | 0.22848968  | 2312939  | -0.15130678 | empty        |           |           |                                 |
| 2098 K15 | X | 434    | 440    | -0.45915132 | 634   | 640   | -0.19115723 | 2063193 | -0.18443712 | 2267037  | -0.20606073 | experimental | Prestwick | 1017      | Etilefrine hydrochloride        |
| 2098 K16 | X | 514    | 520    | -0.28903621 | 432   | 440   | -1.21031527 | 2443343 | 0.24736209  | 2428522  | -0.01343424 | empty        |           |           |                                 |
| 2098 K17 | X | 551    | 560    | -0.21035797 | 630   | 640   | -0.21153568 | 2120260 | -0.10761348 | 2282472  | -0.18764917 | experimental | Prestwick | 1018      | Alprostadiol                    |
| 2098 K18 | X | 514    | 520    | -0.28903621 | 752   | 760   | 0.40944994  | 2385864 | 0.18207368  | 2686869  | 0.29473355  | empty        |           |           |                                 |
| 2098 K19 | X | 634    | 640    | -0.03386354 | 712   | 720   | 0.20585429  | 2188742 | -0.04183036 | 2310850  | -0.15379863 | experimental | Prestwick | 1019      | Trifenoside                     |
| 2098 K20 | X | 394    | 400    | -0.54420888 | 633   | 640   | -0.19624712 | 2310220 | 0.09615228  | 2368796  | -0.08467807 | experimental |           |           |                                 |
| 2098 K21 | X | 513    | 520    | -0.29116265 | 553   | 560   | -0.60343843 | 2407296 | 0.20641755  | 2251146  | -0.22501622 | experimental | Prestwick | 1020      | Rimexolone                      |
| 2098 K22 | X | 573    | 600    | -0.12104753 | 673   | 680   | 0.00734853  | 2676695 | 0.51241853  | 2383315  | -0.06735916 | empty        |           |           |                                 |
| 2098 K23 | E | 292    | 600    | -0.80363442 | 312   | 600   | -1.83010223 | 2007386 | -0.24782636 | 2156002  | -0.33850821 | empty        |           |           |                                 |
| 2098 K24 | P | 111000 | 111480 | 234.652693  | 96817 | 97360 | 489.369857  | 2366225 | 0.15976642  | 229463   | -0.17346506 | empty        |           |           |                                 |
| 2098 L01 | N | 555    | 560    | -0.20185221 | 833   | 840   | 0.82173114  | 2170359 | -0.06271098 | 2245964  | -0.23119754 | empty        |           |           |                                 |
| 2098 L02 | E | 275    | 280    | -0.79725511 | 233   | 240   | -2.23220364 | 2143913 | -0.09275007 | 2207630  | -0.27692404 | empty        |           |           |                                 |
| 2098 L03 | E | 794    | 800    | 0.30636669  | 911   | 920   | 1.21874266  | 2209456 | -0.01830205 | 2427055  | -0.01518414 | experimental | Prestwick | 1091      | Spaglumic acid                  |
| 2098 L04 | E | 671    | 680    | 0.0448147   | 912   | 920   | 1.22383255  | 2173158 | -0.05953169 | 2282291  | -0.18786508 | empty        |           |           |                                 |
| 2098 L05 | E | 913    | 920    | 0.55941292  | 549   | 560   | -0.62379799 | 2180306 | -0.05141252 | 2381274  | -0.06979375 | experimental | Prestwick | 1092_2009 | Ranolazine                      |
| 2098 L06 | E | 552    | 560    | -0.20823153 | 632   | 640   | -0.20133701 | 2260300 | 0.03944989  | 2446104  | 0.00753835  | empty        |           |           |                                 |
| 2098 L07 | E | 714    | 720    | 0.13621557  | 631   | 640   | -0.2064269  | 2233759 | 0.00930289  | 2774426  | 0.39917543  | experimental | Prestwick | 1093      | (-)-Quinpirole hydrochloride    |
| 2098 L08 | E | 553    | 560    | -0.20610509 | 713   | 720   | 0.21094418  | 2351935 | 0.14353491  | 2466476  | 0.03183898  | empty        |           |           |                                 |
| 2098 L09 | E | 593    | 600    | -0.12104753 | 631   | 640   | -0.2064269  | 2383475 | 0.1793601   | 2457836  | 0.0215328   | experimental | Prestwick | 1094      | Sulfadoxine                     |
| 2098 L10 | E | 673    | 680    | 0.04906758  | 593   | 600   | -0.39984277 | 2244941 | 0.02200413  | 2456876  | 0.02038767  | empty        |           |           |                                 |
| 2098 L11 | E | 394    | 400    | -0.54420888 | 792   | 800   | 0.61304559  | 2547106 | 0.36522288  | 2356263  | -0.09962799 | experimental | Prestwick | 1095      | Cyclopentolate hydrochloride    |
| 2098 L12 | E | 394    | 400    | -0.54420888 | 672   | 680   | 0.00225864  | 2167262 | -0.06622875 | 2482494  | 0.05094596  | empty        |           |           |                                 |
| 2098 L13 | E | 555    | 560    | -0.20185221 | 790   | 800   | 0.60286581  | 2335933 | 0.12535879  | 2487395  | 0.05679299  | experimental | Prestwick | 1096      | Estriol                         |
| 2098 L14 | E | 473    | 480    | -0.37622061 | 631   | 640   | -0.21094418 | 2107440 | 0.07198886  | 2416735  | 0.04579077  | empty        |           |           |                                 |
| 2098 L15 | E | 514    | 520    | -0.28903621 | 672   | 680   | 0.00225864  | 1981137 | -0.07641669 | 2464469  | 0.02944494  | experimental | Prestwick | 1097      | (-)-Isoproterenol hydrochloride |
| 2098 L16 | E | 470    | 480    | -0.38259952 | 751   | 760   | 0.40436005  | 2263070 | 0.04259623  | 2501842  | 0.07402512  | empty        |           |           |                                 |
| 2098 L17 | E | 1714   | 1720   | 2.26269048  | 1552  | 1560  | 4.48136298  | 2243345 | 0.02019129  | 2446370  | 0.00785565  | experimental | Prestwick | 1098      | Kaempferol                      |
| 2098 L18 | E | 470    | 480    | -0.38259952 | 550   | 560   | -0.6187081  | 2262777 | 0.04226343  | 2280669  | -0.18979987 | empty        |           |           |                                 |
| 2098 L19 | E | 634    | 640    | -0.03386354 | 714   | 720   | 0.21603407  | 2248234 | 0.02574454  | 2618151  | 0.21319309  | experimental | Prestwick | 1099      | Nialamide                       |
| 2098 L20 | E | 514    | 520    | -0.28903621 | 512   | 520   | -0.81212397 | 2175945 | -0.05636603 | 2317585  | -0.14576482 | empty        |           |           |                                 |
| 2098 L21 | E | 753    | 760    | 0.21918269  | 673   | 680   | 0.00734853  | 2090407 | -0.15352568 | 2119125  | -0.38249673 | experimental | Prestwick | 1100      | Vitamin K2                      |
| 2098 L22 | E | 394    | 400    | -0.54420888 | 632   | 640   | -0.21094418 | 2107440 | 0.07198886  | 2167896  | 0.05661617  | empty        |           |           |                                 |
| 2098 L23 | E | 372    | 600    | -0.59099053 | 595   | 880   | -0.38966299 | 2431404 | 0.23380099  | 2163886  | -0.32910382 | empty        |           |           |                                 |
| 2098 L24 | P | 76405  | 77000  | 161.088539  | 96382 | 96840 | 487.155755  | 2038197 | -0.21282921 | 2170617  | -0.32107479 | empty        |           |           |                                 |
| 2098 M01 | N | 716    | 720    | 0.14050445  | 1234  | 1240  | 2.86277755  | 1685559 | -0.61337849 | 2638352  | 0.23686031  | empty        |           |           |                                 |
| 2098 M02 | E | 235    | 240    | -0.88231266 | 272   | 280   | -2.03369788 | 2132489 | -0.1057262  | 2824779  | 0.45923873  | empty        |           |           |                                 |
| 2098 M03 | X | 593    | 600    | -0.12104753 | 1112  | 1120  | 2.24181081  | 2039564 | -0.21127648 | 2518293  | 0.0936486   | experimental | Prestwick | 1021      | Isradipine                      |
| 2098 M04 | X | 433    | 440    | -0.46127776 | 627   | 640   | -0.22678647 | 2229514 | 0.00448114  | 2559754  | 0.14310512  | empty        |           |           |                                 |
| 2098 M05 | X | 480    | 480    | -0.37834664 | 630   | 640   | -0.37834664 | 2209584 | -0.01815566 | 2413765  | -0.1304727  | experimental | Prestwick | 1022      | Tiletamine hydrochloride        |
| 2098 M06 | X | 674    | 680    | 0.05119402  | 670   | 680   | -0.00792114 | 2215535 | -0.01139712 | 2401498  | -0.04566697 | empty        |           |           |                                 |
| 2098 M07 | X | 393    | 400    | -0.54633532 | 832   | 840   | 0.81664125  | 2197599 | -0.03177    | 2438068  | -0.00204735 | experimental | Prestwick | 1023      | Isometheptene mucate            |
| 2098 M08 | X | 554    | 560    | -0.20397865 | 551   | 560   | -0.61361821 | 2158697 | -0.07595744 | 2335482  | -0.12441649 | empty        |           |           |                                 |
| 2098 M09 | X | 591    | 600    | -0.12530041 | 831   | 840   | 0.81155136  | 2108610 | -0.13284952 | 2208169  | -0.27628109 | experimental | Prestwick | 1024      | Nifurtimox                      |
| 2098 M10 | X | 554    | 560    | -0.20397865 | 312   | 320   | -1.83010223 | 2154825 | -0.08035551 | 2415660  | -0.0287766  | empty        |           |           |                                 |
| 2098 M11 | X | 355    | 360    | -0.62713999 | 834   | 840   | 0.826682103 | 2152551 | -0.08293847 | 2248432  | -0.2282536  | empty        |           |           |                                 |
| 2098 M12 | X | 393    | 400    | -0.20185221 | 430   | 440   | -1.22949055 | 2102307 | -0.14000888 | 2416265  | -0.14652378 | empty        |           |           |                                 |
| 2098 M13 | X | 393    | 400    | -0.54633532 | 1274  | 1280  | 3.0663732   | 2227384 | -0.00202737 | 2434207  | -0.06337417 | experimental | Prestwick | 1026_2009 | Arbutin                         |
| 2098 M14 | X | 634    | 640    | -0.03386354 | 391   | 400   | -1.42800082 | 2271782 | 0.05249189  | 2466819  | 0.03224813  | empty        |           |           |                                 |
| 2098 M15 | X | 673    | 680    | 0.04906758  | 714   | 720   | 0.21603407  | 2299619 | 0.08411098  | 2426381  | -0.01598812 | experimental | Prestwick | 1027      | Tocainide hydrochloride         |
| 2098 M16 | X | 714    | 720    | 0.13621557  | 511   | 520   | -0.81721386 | 2176295 | -0.05596848 | 2342427  | -0.11613218 | empty        |           |           |                                 |
| 2098 M17 | X | 470    | 480    | -0.38259952 | 710   | 720   | 0.19567451  | 2256415 | 0.03503705  | 2541883  | 0.1217878   | experimental | Prestwick | 1028      | Benzathine benzylpenicillin     |
| 2098 M18 | X | 554    | 560    | -0.20397865 | 553   | 560   | -0.60343843 | 2312072 | 0.09825591  | 2414647  | -0.02783784 | empty        |           |           |                                 |
| 2098 M19 | X | 594    | 600    | -0.1189211  | 392   | 400   | -1.42291092 | 2501960 | 0.3139431   | 2320419  | -0.1423843  | experimental | Prestwick | 1029      | Risperidone                     |
| 2098 M20 | X | 433    | 440    | -0.46127776 | 632   | 640   | -0.20133701 | 2296256 | 0.19387759  | 2492029  | 0.06231973  | empty        |           |           |                                 |
| 2098 M21 | X | 552    | 560    | -0.20823153 | 832   | 840   | 0.81664125  | 2247678 | 0.025113    | 2331644  | -0.12899462 | experimental | Prestwick | 1030      | Torseamide                      |
| 2098 M22 | X | 473    | 480    | -0.3762202  | 553   | 560   | -0.60343843 | 2110447 | -0.13076294 | 2198118  | -0.28827037 | empty        |           |           |                                 |
| 2098 M23 | E | 204    | 480    | -0.94823227 | 381   | 560   | -1.47889973 | 2100211 | -0.14238966 | 2225885  | -0.25514866 | empty        |           |           |                                 |
| 2098 M24 | P | 93067  | 93600  | 196.519264  | 59298 | 59800 | 298.402226  | 2046836 | -0.20301647 | 2159164  | -0.33473643 | empty        |           |           |                                 |
| 2098 N01 | N | 475    | 480    | -0.37196733 | 833   | 840   | 0.82173114  | 1858129 | -0.41736221 | 2068286  | -0.44313975 | empty        |           |           |                                 |
| 2098 N02 | E | 235    | 240    | -0.88231266 | 273   | 280   | -2.02860799 | 2018706 | -0.23496836 | 2219508  | -0.26275543 | empty        |           |           |                                 |
| 2098 N03 | E | 874    | 880    | 0.4764818   | 951   | 960   | 1.42233831  | 2123646 | -0.12712931 | 2548443  | 0.12661286  | experimental | Prestwick | 1101_2009 | Perindopril                     |
| 2098 N04 | E | 713    | 720    | 0.13412513  | 1076  | 1080  | 2.02803538  | 2122679 | -0.11686903 | 2236324  | -0.24269656 | empty        |           |           |                                 |
| 2098 N05 | E | 633    | 640    | -0.03598998 | 866   | 880   | 0.98969755  | 2074785 | -0.17127017 | 2322013  | -0.14048291 | experimental | Prestwick | 1102_2009 | Fexofenadine HCl                |
| 2098 N06 | E | 513    | 520    | -0.29116265 | 711   | 720   | 0.2007644   | 2247206 | 0.02457687  | 2296004  | -0.1715076  | empty        |           |           |                                 |
| 2098 N07 | E | 434    | 440    | -0.45915132 | 792   | 800   | 0.61304559  | 2003507 | -0.25223238 | 2357788  | -0.0978089  | experimental | Prestwick | 1103      | Quinic acid                     |
| 2098 N08 | E | 472    | 480    | -0.37834664 | 549   | 560   | -0.62379799 | 2227198 | 0.00185047  | 2345955  | -0.11192383 | empty        |           |           |                                 |
| 2098 N09 | E | 1353   | 1360   | 1.49504604  | 1592  | 1600  | 4.68495863  | 2223346 | -0.00252488 | 2426172  | -0.01623742 | experimental | Prestwick | 1104_2009 | Clonixin Lysinate               |
| 2098 N10 | E | 472    | 480    | -0.12317397 | 482   | 480   | -1.01571962 | 2277097 | 0.05852302  | 24121235 | -0.03214639 | empty        |           |           |                                 |
| 2098 N11 | E | 314    | 320    | -0.7143399  | 352   | 360   | -0.6605658  | 1998024 | -0.00202737 | 2202932  | -1.47537247 | experimental | Prestwick | 1105      | Verteporfin                     |
| 2098 N12 | E | 470    | 480    | -0.37409376 | 714   | 720   | 0.21603407  | 2114279 | -0.1264103  | 2326357  | -0.13530119 | empty        |           |           |                                 |
| 2098 N13 | E | 555    | 560    | -0.20185221 | 470   | 480   | -1.0258994  | 2036671 | -0.21456254 | 2335005  | -0.12498547 | experimental | Prestwick | 1106      | Meropenem                       |
| 2098 N14 | E | 594    | 600    | -0.1189211  | 433   | 440   | -1.21422538 | 2337702 | 0.12736814  | 2483330  | 0.05194318  | empty        |           |           |                                 |
| 2098 N15 | E | 593    | 600    | -0.12104753 | 593   | 600   | -0.39984277 | 2203692 | -0.02484918 | 2286244  | -0.18314976 | experimental | Prestwick | 1107      | Ramipril                        |
| 2098 N16 | E | 472    | 480    | -0.37834664 | 793   | 800   | 0.61813549  | 2427636 | 0.22952105  | 2343320  | -0.11506697 | empty        |           |           |                                 |
| 2098 N17 | E | 594    | 600    |             |       |       |             |         |             |          |             |              |           |           |                                 |



|          |   |        |        |             |        |        |             |          |             |         |             |              |                      |                                         |
|----------|---|--------|--------|-------------|--------|--------|-------------|----------|-------------|---------|-------------|--------------|----------------------|-----------------------------------------|
| 3229 C01 | D | 1543   | 1560   | -1.12867135 | 1744   | 1760   | -1.00510337 | 2715465  | 0.08874007  | 2462002 | -0.88235517 | DMSO         |                      |                                         |
| 3229 C02 | D | 1977   | 2000   | -0.61011758 | 1900   | 1920   | -0.80579772 | 3023071  | 0.7528757   | 2799391 | -0.26922571 | DMSO         |                      |                                         |
| 3229 C03 | X | 2532   | 2560   | 0.05300994  | 1933   | 1960   | -0.76363691 | 2768442  | 0.20311987  | 2604597 | -0.62322048 | experimental | EMD Bioscienc 203297 | Bisindolylmaleimide IV                  |
| 3229 C04 | X | 3540   | 3560   | 1.25739289  | 2618   | 2640   | 0.11159193  | 2930442  | 0.56288539  | 2785270 | -0.29498749 | experimental | EMD Bioscienc 189406 | Aurora Kinase/Cdk Inhibitor             |
| 3229 C05 | X | 1610   | 1640   | -0.04861812 | 1493   | 1520   | -1.25781005 | 2792852  | 0.25582219  | 2850375 | -0.75765736 | experimental | EMD Bioscienc 203696 | BPD-1                                   |
| 3229 C06 | X | 3700   | 3720   | 1.44856478  | 3220   | 3240   | 0.8806347   | 2373825  | -0.64887655 | 2727682 | -0.39954087 | experimental | EMD Bioscienc 402085 | Indirubin-3'-monoxide                   |
| 3229 C07 | X | 1447   | 1480   | -1.24337449 | 1208   | 1240   | -1.68989715 | 1811507  | -1.86294722 | 2159501 | -1.43208345 | experimental | EMD Bioscienc 220285 | Chelerythrine Chloride                  |
| 3229 C08 | X | 1981   | 2000   | -0.60533828 | 2780   | 2800   | 0.31849056  | 2656125  | -0.03937775 | 3047672 | 0.18196978  | experimental | EMD Bioscienc 196870 | BAY 11-7082                             |
| 3229 C09 | X | 1857   | 1880   | -0.75349665 | 1977   | 2000   | -0.7074225  | 2471707  | -0.43754477 | 2760342 | -0.34018858 | experimental | EMD Bioscienc 234505 | Compound 56                             |
| 3229 C10 | X | 2220   | 2240   | -0.31977526 | 2058   | 2080   | -0.60393687 | 2840318  | 0.35830349  | 3418212 | 0.8553438   | experimental | EMD Bioscienc 203600 | Bohemine                                |
| 3229 C11 | X | 1814   | 1840   | -0.80487395 | 1853   | 1880   | -0.86584494 | 2820997  | 0.31658856  | 2866574 | -0.11079    | experimental | EMD Bioscienc 260951 | DNA-PK Inhibitor II                     |
| 3229 C12 | X | 2376   | 2400   | -0.13338266 | 3088   | 3120   | 0.71199145  | 2331044  | -0.74124272 | 2159505 | -0.79537941 | experimental | EMD Bioscienc 217695 | Cdk1 Inhibitor                          |
| 3229 C13 | X | 2208   | 2240   | -0.33411316 | 5320   | 5360   | 3.57637137  | 2505991  | -0.36352402 | 3042886 | 0.17327228  | experimental | EMD Bioscienc 260962 | DNA-PK Inhibitor III                    |
| 3229 C14 | X | 2977   | 3000   | 0.58470677  | 2738   | 2760   | 0.25205534  | 2257459  | -0.90011215 | 2675005 | -0.4952696  | experimental | EMD Bioscienc 217696 | Cdk1 Inhibitor, CGP74514A               |
| 3229 C15 | X | 2049   | 2080   | -0.52409023 | 2169   | 2200   | -0.46212324 | 2625036  | -0.10650034 | 3113436 | 0.30148122  | experimental | EMD Bioscienc 528100 | PI-103                                  |
| 3229 C16 | X | 2975   | 3000   | 0.58231713  | 2613   | 2640   | 0.1051313   | 2438416  | -0.50942158 | 2985808 | 0.06954572  | experimental | EMD Bioscienc 217714 | Cdk1/2 Inhibitor III                    |
| 3229 C17 | X | 2731   | 2760   | 0.29077998  | 2690   | 2720   | 0.20350653  | 2502575  | -0.37089932 | 2891222 | -0.1023433  | experimental | EMD Bioscienc 266788 | Diacylglycerol Kinase Inhibitor II      |
| 3229 C18 | X | 2125   | 2160   | -0.43283858 | 2491   | 2520   | -0.05073594 | 3009336  | 0.7232212   | 3364211 | 0.7572309   | experimental | EMD Bioscienc 217720 | Cdk1/5 Inhibitor                        |
| 3229 C19 | X | 5012   | 5040   | 3.01617434  | 3893   | 3920   | 1.74045971  | 2845326  | 0.3691116   | 3128786 | 0.32937643  | experimental | EMD Bioscienc 317200 | DMB1                                    |
| 3229 C20 | X | 2328   | 2360   | -0.19073423 | 1972   | 2000   | -0.71381005 | 3072681  | 0.85989859  | 4103913 | 2.10145284  | experimental | EMD Bioscienc 218696 | Casein Kinase I Inhibitor, D4476        |
| 3229 C21 | X | 1891   | 1920   | -0.71287248 | 2134   | 2160   | -0.50683925 | 2332845  | -0.73735427 | 3729423 | 1.42090057  | experimental | EMD Bioscienc 324673 | EGFR/ErbB-2 Inhibitor                   |
| 3229 C22 | X | 3011   | 3040   | 0.62533008  | 2090   | 2120   | -0.56305366 | 2844882  | 0.36815738  | 3235354 | 0.52304006  | experimental | EMD Bioscienc 218710 | Casein Kinase II Inhibitor III, TBCA    |
| 3229 C23 | N | 3332   | 3880   | 1.00886942  | 2654   | 3040   | 0.15751292  | 2488650  | -0.40096405 | 2983039 | 0.06451367  | empty        |                      |                                         |
| 3229 C24 | P | 177948 | 178920 | 209.644319  | 124356 | 125080 | 185.644027  | 2577253  | -0.20966606 | 3035511 | 0.15986986  | empty        |                      |                                         |
| 3229 D01 | X | 2026   | 2040   | -0.55157119 | 1867   | 1880   | -0.84795854 | 2710412  | 0.07783041  | 2468147 | -0.871188   | experimental | EMD Bioscienc 218697 | Casein Kinase II Inhibitor I            |
| 3229 D02 | E | 2996   | 2980   | -0.94586323 | 2492   | 2480   | -1.47270937 | 3621444  | 0.3621444   | 2842097 | -0.74809494 | empty        |                      |                                         |
| 3229 D03 | X | 2295   | 2320   | -0.23016524 | 2492   | 2520   | -0.04945834 | 2858943  | 0.39851573  | 2757567 | -0.34523153 | experimental | EMD Bioscienc 218713 | Keratinocyte Differentiation Inducer    |
| 3229 D04 | E | 1332   | 1360   | -1.38077929 | 2173   | 2200   | -0.45701284 | 3018846  | 0.74375373  | 2950114 | 0.40647981  | experimental | EMD Bioscienc 218714 | Keratinocyte Differentiation Inducer    |
| 3229 D05 | X | 1461   | 1480   | -1.22664695 | 1897   | 1920   | -0.80963053 | 3231161  | 1.20215167  | 3038354 | 0.15685863  | experimental | EMD Bioscienc 218714 | Keratinocyte Differentiation Inducer    |
| 3229 D06 | E | 1815   | 1840   | -0.80367913 | 2414   | 2440   | -0.14911116 | 3183275  | 1.09876357  | 3434938 | 0.88573958  | empty        |                      |                                         |
| 3229 D07 | X | 1816   | 1840   | -0.8024843  | 2093   | 2120   | -0.55922086 | 3254464  | 1.25246393  | 3528385 | 1.05555872  | experimental | EMD Bioscienc 219445 | Cdk2 Inhibitor II                       |
| 3229 D08 | E | 1542   | 1560   | -1.12986618 | 1738   | 1760   | -1.01276898 | 3019977  | 0.74619561  | 3443002 | 0.90039411  | empty        |                      |                                         |
| 3229 D09 | X | 1652   | 1680   | -0.9984355  | 1653   | 1680   | -1.121365   | 2916502  | 0.52278828  | 3410161 | 0.8407129   | experimental | EMD Bioscienc 219448 | Cdk2/5 Inhibitor                        |
| 3229 D10 | E | 1640   | 1640   | -0.04149217 | 1893   | 1880   | -0.86070782 | 3479275  | 1.7378492   | 2857423 | 0.28406944  | experimental | EMD Bioscienc 219457 | Cdk2 Inhibitor, p35                     |
| 3229 D11 | X | 2575   | 2600   | 0.10438738  | 1657   | 1680   | -1.1162546  | 3307227  | 1.3663817   | 3095934 | 0.2696752   | experimental | EMD Bioscienc 219457 | Chk2 Inhibitor                          |
| 3229 D12 | E | 2088   | 2120   | -0.47749208 | 1650   | 1680   | -1.1251978  | 3128778  | 0.98110202  | 3325613 | 0.68706572  | empty        |                      |                                         |
| 3229 D13 | X | 2575   | 2600   | 0.10438738  | 2049   | 2080   | -0.61543528 | 3249219  | 1.24113973  | 3439254 | 0.89358295  | experimental | EMD Bioscienc 220485 | Chk2 Inhibitor                          |
| 3229 D14 | E | 2250   | 2280   | -0.28393053 | 1691   | 1720   | -1.07281619 | 3025545  | 0.75821718  | 3358498 | 0.74682689  | empty        |                      |                                         |
| 3229 D15 | X | 2094   | 2120   | -0.47032313 | 2658   | 2680   | 0.16262332  | 3062071  | 0.83707851  | 2926055 | 0.63335063  | experimental | EMD Bioscienc 234501 | Compound 401                            |
| 3229 D16 | E | 1968   | 2000   | -0.6208701  | 2085   | 2120   | -0.56944187 | 3183919  | 1.1001554   | 3616706 | 1.21606429  | empty        |                      |                                         |
| 3229 D17 | X | 2480   | 2480   | 0.045736894 | 2884   | 2880   | -0.57138094 | 2938324  | 0.5703344   | 2947273 | 0.0948622   | experimental | EMD Bioscienc 238806 | Cdk2/9 Inhibitor                        |
| 3229 D18 | E | 2451   | 2480   | -0.43770884 | 1570   | 1600   | -1.22740583 | 2982096  | 0.66440877  | 3094711 | 0.26745269  | empty        |                      |                                         |
| 3229 D19 | X | 2207   | 2240   | -0.33530798 | 2453   | 2480   | -0.0928475  | 2729038  | 1.11804481  | 3193291 | 0.44659992  | experimental | EMD Bioscienc 238811 | Cdk9 Inhibitor II                       |
| 3229 D20 | E | 2089   | 2120   | -0.47629725 | 1772   | 1800   | -0.96933057 | 3069048  | 0.85214218  | 3110996 | 0.29704706  | empty        |                      |                                         |
| 3229 D21 | X | 2247   | 2280   | -0.28751501 | 2212   | 2240   | -0.40718643 | 2733601  | 0.12789653  | 2905830 | -0.07579651 | experimental | EMD Bioscienc 238900 | 4-Cyano-3-methylisoquinoline            |
| 3229 D22 | E | 2086   | 2120   | -0.47988173 | 2172   | 2200   | -0.45829044 | 2543044  | -0.28352488 | 3524704 | 1.04886932  | empty        |                      |                                         |
| 3229 D23 | N | 3516   | 4000   | 1.2787171   | 3060   | 3480   | 0.67621865  | 3011738  | 0.72840723  | 3161890 | 0.38953558  | empty        |                      |                                         |
| 3229 D24 | P | 156674 | 157600 | 184.225626  | 136116 | 136800 | 170.668607  | 2351053  | 0.6942236   | 2869804 | 0.24840944  | empty        |                      |                                         |
| 3229 E01 | D | 1464   | 1480   | -1.22306208 | 1225   | 1240   | -0.69187794 | 24691126 | -0.38698206 | 2724181 | -0.40599316 | DMSO         |                      |                                         |
| 3229 E02 | D | 1737   | 1760   | -0.89687543 | 1376   | 1400   | -1.47526029 | 2911443  | 0.51186657  | 3379744 | 0.78543677  | DMSO         |                      |                                         |
| 3229 E03 | X | 3096   | 3120   | 0.72689087  | 3938   | 3960   | 1.79795173  | 2866173  | 0.41412564  | 3914523 | -0.05999891 | experimental | EMD Bioscienc 324674 | EGFR Inhibitor                          |
| 3229 E04 | X | 2296   | 2320   | -0.22896861 | 2170   | 2200   | -0.46084564 | 2477290  | -0.42549081 | 2743529 | -0.37074247 | experimental | EMD Bioscienc 219476 | Cdk4 Inhibitor                          |
| 3229 E05 | X | 1538   | 1560   | -1.13464547 | 1738   | 1760   | -1.01276898 | 2684277  | 0.02140373  | 3189071 | 0.438931    | experimental | EMD Bioscienc 324840 | EGFR/ErbB-2/ErbB-4 Inhibitor            |
| 3229 E06 | X | 1735   | 1760   | -0.89926508 | 1811   | 1840   | -0.91950415 | 2519061  | -0.33530529 | 3033319 | 0.15588639  | experimental | EMD Bioscienc 219477 | Cdk4 Inhibitor II, 625987               |
| 3229 E07 | X | 3221   | 3240   | 0.87624392  | 3701   | 3720   | 1.49516045  | 3173429  | -0.10755056 | 3372387 | 0.77206706  | experimental | EMD Bioscienc 343020 | Flt-3 Inhibitor                         |
| 3229 E08 | X | 768    | 800    | -2.05465023 | 1009   | 1040   | -1.94413961 | 1431162  | -2.68412973 | 1605756 | -2.43839181 | experimental | EMD Bioscienc 219478 | Cdk4 Inhibitor III                      |
| 3229 E09 | X | 4502   | 4520   | 2.40681392  | 3621   | 3640   | 1.39295242  | 2712829  | 0.08304882  | 2570051 | -0.68600015 | experimental | EMD Bioscienc 343021 | Flt-3 Inhibitor II                      |
| 3229 E10 | X | 1809   | 1840   | -0.81084807 | 2373   | 2400   | -0.20149277 | 2875162  | 0.4335333   | 3340682 | 0.71445027  | experimental | EMD Bioscienc 219479 | Cdc2-Like Kinase Inhibitor, TG003       |
| 3229 E11 | X | 2889   | 2920   | 0.47956223  | 2370   | 2400   | -0.20532557 | 3038929  | 0.78711386  | 3023825 | 0.13863316  | experimental | EMD Bioscienc 344036 | cFMS Receptor Tyrosine Kinase Inhibitor |
| 3229 E12 | X | 3535   | 3560   | 1.25141876  | 3416   | 3440   | 1.13104436  | 2661359  | -0.02800773 | 3128266 | 0.32843144  | experimental | EMD Bioscienc 220486 | Chk2 Inhibitor II                       |
| 3229 E13 | X | 1928   | 1960   | -0.66866397 | 1972   | 2000   | -0.71381005 | 2475828  | -0.42864734 | 2829357 | -0.21476917 | experimental | EMD Bioscienc 365250 | G7 6976                                 |
| 3229 E14 | X | 2775   | 2800   | 0.34335225  | 2500   | 2520   | -0.03923753 | 4312499  | 3.53681061  | 3368142 | 0.76435271  | experimental | EMD Bioscienc 234503 | Compound 52                             |
| 3229 E15 | X | 2449   | 2480   | -0.04616049 | 1849   | 1880   | -1.1264754  | 3110523  | 0.94168863  | 2561486 | -0.70156513 | experimental | EMD Bioscienc 365251 | G7 6983                                 |
| 3229 E16 | E | 2885   | 2920   | 0.47478293  | 3846   | 3880   | 1.6804125   | 3503613  | 1.79038819  | 3562560 | 1.11766418  | experimental | EMD Bioscienc 238803 | Cdk2 Inhibitor III                      |
| 3229 E17 | X | 5329   | 5360   | 3.39493366  | 5889   | 5920   | 4.29054995  | 3549325  | 1.88908252  | 3799713 | 1.5486317   | experimental | EMD Bioscienc 371806 | GTP-14564                               |
| 3229 E18 | X | 2606   | 2640   | 0.14142694  | 2327   | 2360   | -0.26026239 | 3381862  | 1.52752213  | 4520293 | 2.85813087  | experimental | EMD Bioscienc 238804 | Cdk2 Inhibitor IV, NU6140               |
| 3229 E19 | X | 1847   | 1880   | -0.76544475 | 2052   | 2080   | -0.61160248 | 2795127  | 0.26073402  | 3231098 | 0.51530573  | experimental | EMD Bioscienc 375670 | Herbimycin A, Streptomyces sp.          |
| 3229 E20 | X | 3927   | 3960   | 1.71978991  | 2894   | 2920   | 0.46413699  | 2647456  | -0.05809452 | 3442632 | 0.89972172  | experimental | EMD Bioscienc 219491 | Cdk/Crk Inhibitor                       |
| 3229 E21 | X | 5088   | 5120   | 3.10698099  | 3333   | 3360   | 1.02500353  | 2456551  | -0.47026728 | 2462524 | -0.88140655 | experimental | EMD Bioscienc 343022 | Flt-3 Inhibitor III                     |
| 3229 E22 | X | 2464   | 2520   | -0.00434163 | 2374   | 2400   | -0.87095534 | 2800172  | 0.27162641  | 3858768 | 1.65559533  | experimental | EMD Bioscienc 328009 | ERK Inhibitor III                       |
| 3229 E23 | X | 3134   | 3560   | 0.7729242   | 2504   | 2920   | -0.03412713 | 2500365  | -0.37349782 | 282216  | -0.22229452 | DMSO         |                      |                                         |
| 3229 E24 | P | 136106 | 137080 | 159.650478  | 134783 | 135400 | 168.965565  | 2604890  | -0.14999649 | 3186232 | 0           |              |                      |                                         |

|          |   |        |        |             |        |        |             |          |             |         |             |              |                      |                                             |
|----------|---|--------|--------|-------------|--------|--------|-------------|----------|-------------|---------|-------------|--------------|----------------------|---------------------------------------------|
| 3229 F19 | X | 2376   | 2400   | -0.13338266 | 1857   | 1880   | -0.86073454 | 3146771  | 1.01994974  | 3055258 | 0.19575564  | experimental | EMD Bioscienc 401488 | IKK-3 Inhibitor IX                          |
| 3229 F20 | E | 2122   | 2160   | -0.43686805 | 1688   | 1720   | -1.07664899 | 3070310  | 0.8548669   | 2927130 | -0.0370885  | empty        |                      |                                             |
| 3229 F21 | X | 2168   | 2200   | -0.38190613 | 2212   | 2240   | -0.40718643 | 2777151  | 0.22192301  | 3125270 | 0.32298688  | experimental | EMD Bioscienc 401489 | IKK Inhibitor X                             |
| 3229 F22 | E | 1567   | 1600   | -0.09999557 | 2133   | 2160   | -0.50811685 | 2514760  | -0.34459134 | 2843922 | -0.18830053 | empty        |                      |                                             |
| 3229 F23 | X | 3026   | 3260   | 0.64325317  | 2565   | 2800   | 0.3800649   | 2531698  | -0.30802142 | 3142707 | 0.35467475  | empty        |                      |                                             |
| 3229 F24 | P | 174419 | 175360 | 205.427784  | 72510  | 73240  | 89.4055608  | 2765342  | 0.19642683  | 2369492 | -1.05047152 | empty        |                      |                                             |
| 3229 G01 | D | 1705   | 1720   | -0.93510981 | 1623   | 1640   | -1.15969301 | 2791656  | 0.25323997  | 2521113 | -0.77493408 | DMSO         |                      |                                             |
| 3229 G02 | D | 1620   | 1640   | -1.03666988 | 1899   | 1920   | -0.80707533 | 3058999  | 0.83044592  | 2929074 | -0.03355571 | DMSO         |                      |                                             |
| 3229 G03 | X | 1936   | 1960   | -0.65910538 | 2457   | 2480   | -0.09417435 | 2533599  | -0.30391707 | 2326845 | -1.12797295 | experimental | EMD Bioscienc 407248 | IGF-1R Inhibitor II                         |
| 3229 G04 | X | 1498   | 1520   | -1.18243845 | 1213   | 1240   | -1.68350914 | 3086413  | 0.88963402  | 2981861 | 0.06237292  | W            | EMD Bioscienc 688000 | ROCK Inhibitor, Y-27632                     |
| 3229 G05 | X | 1699   | 1720   | -0.94227875 | 2381   | 2400   | -0.19127157 | 2675481  | 0.00241276  | 3056460 | 0.19794001  | experimental | EMD Bioscienc 407651 | IRAK-1/4 Inhibitor                          |
| 3229 G06 | X | 2019   | 2040   | -0.55993496 | 1815   | 1840   | -0.91439755 | 2292562  | 0.68700535  | 3041657 | 0.17254719  | experimental | EMD Bioscienc 328007 | ERK Inhibitor II, FR180204                  |
| 3229 G07 | X | 1813   | 1840   | -0.80606878 | 2497   | 2520   | -0.04307033 | 2740942  | 0.14374609  | 2805225 | -0.25862372 | experimental | EMD Bioscienc 420099 | JAK Inhibitor I                             |
| 3229 G08 | X | 2098   | 2120   | -0.46554383 | 1735   | 1760   | -1.01660178 | 2908938  | 0.50645262  | 2876172 | -0.12969333 | experimental | EMD Bioscienc 328008 | ERK Inhibitor II, Negative Control          |
| 3229 G09 | X | 1940   | 1960   | -0.65432608 | 2742   | 2760   | 0.26994174  | 2493381  | -0.3907496  | 3469956 | 0.94937701  | experimental | EMD Bioscienc 420104 | JAK3 Inhibitor II                           |
| 3229 G10 | X | 897    | 920    | -1.90052789 | 855    | 880    | -2.14089006 | 1336039  | -2.8895047  | 1312295 | -2.9716919  | experimental | EMD Bioscienc 341251 | Fascapslysin, synthetic                     |
| 3229 G11 | X | 2539   | 2560   | 0.06137371  | 2099   | 2120   | -0.55155526 | 2545981  | -0.27718376 | 3762360 | 1.48075624  | experimental | EMD Bioscienc 420121 | JAK3 Inhibitor I                            |
| 3229 G12 | X | 1814   | 1840   | -0.80487395 | 1411   | 1440   | -1.43054428 | 2724289  | 0.10779149  | 3147410 | 0.3632214   | experimental | EMD Bioscienc 361540 | GSK-3b Inhibitor I                          |
| 3229 G13 | X | 2736   | 2760   | 0.2967541   | 3219   | 3240   | 0.8793571   | 2788746  | 0.24695715  | 2661600 | -0.51963021 | experimental | EMD Bioscienc 420126 | JAK3 Inhibitor VI                           |
| 3229 G14 | X | 1694   | 1720   | -0.94825287 | 2133   | 2160   | -0.50811685 | 2867592  | 0.41718932  | 3317776 | 0.67282371  | experimental | EMD Bioscienc 361541 | GSK-3b Inhibitor II                         |
| 3229 G15 | X | 2247   | 2280   | -0.28751501 | 2047   | 2080   | -0.61799048 | 2941675  | 0.57713796  | 3371009 | 0.76956285  | experimental | EMD Bioscienc 428205 | Lck Inhibitor                               |
| 3229 G16 | X | 4536   | 4560   | 2.44743794  | 4576   | 4600   | 2.61306073  | 2642390  | -0.06903225 | 3160406 | 0.38683874  | experimental | EMD Bioscienc 361549 | GSK-3b Inhibitor VIII                       |
| 3229 G17 | X | 2043   | 2080   | -0.53125917 | 2045   | 2080   | -0.62054568 | 2739924  | 0.14154818  | 3110303 | 0.29578769  | experimental | EMD Bioscienc 442002 | LY 294002                                   |
| 3229 G18 | X | 3616   | 3640   | 1.34819954  | 3376   | 3400   | 1.07994035  | 2161356  | -1.10760699 | 3214439 | 0.4850137   | experimental | EMD Bioscienc 361550 | GSK-3 Inhibitor IX                          |
| 3229 G19 | X | 2402   | 2440   | -0.10231723 | 2486   | 2520   | -0.05712394 | 2776451  | 0.22041167  | 3110679 | 0.29647098  | experimental | EMD Bioscienc 442003 | LY 303511                                   |
| 3229 G20 | X | 4640   | 4640   | 2.54064024  | 3975   | 4000   | 1.82523206  | 2678472  | 0.00887046  | 3144441 | 0.56508057  | experimental | EMD Bioscienc 361551 | GSK-3 Inhibitor X                           |
| 3229 G21 | X | 2004   | 2040   | -0.57785732 | 2288   | 2320   | -0.3100888  | 239542   | -0.60220445 | 2659826 | -0.52285406 | experimental | EMD Bioscienc 448181 | Met Kinase Inhibitor                        |
| 3229 G22 | X | 3052   | 3080   | 0.6743186   | 2492   | 2520   | -0.04945834 | 2636719  | -0.0812762  | 3044890 | 0.17691411  | experimental | EMD Bioscienc 361553 | GSK-3b Inhibitor XI                         |
| 3229 G23 | N | 3397   | 3960   | 1.086533    | 2487   | 2840   | -0.05584634 | 2747651  | 0.15823114  | 2913124 | -0.06254219 | empty        |                      |                                             |
| 3229 G24 | P | 183467 | 184320 | 216.238555  | 113329 | 113800 | 141.555928  | 2871477  | 0.42557722  | 3244101 | 0.53893579  | empty        |                      |                                             |
| 3229 H01 | X | 1786   | 1800   | -0.83832903 | 2265   | 2280   | -0.33947361 | 2527729  | -0.31659067 | 2635251 | -0.56751365 | experimental | EMD Bioscienc 401490 | IKK-2 Inhibitor XI                          |
| 3229 H02 | E | 1375   | 1400   | -1.32940184 | 1612   | 1640   | -1.17374662 | 2796636  | 0.26399203  | 2941274 | -0.01138492 | empty        |                      |                                             |
| 3229 H03 | X | 3417   | 3440   | 1.11042949  | 3376   | 3400   | 1.07994035  | 2697403  | 0.04974337  | 3078531 | 0.23804914  | experimental | EMD Bioscienc 402086 | Indirubin-3&prime;-monoxime, 5-Iodo-        |
| 3229 H04 | X | 1840   | 1840   | -0.80965325 | 2044   | 2080   | -0.61799048 | 2941675  | 0.57713796  | 3371009 | 0.76956285  | experimental | EMD Bioscienc 406170 | IP3K Inhibitor                              |
| 3229 H05 | X | 1779   | 1800   | -0.8466928  | 1976   | 2000   | -0.7087001  | 3339644  | 1.43637151  | 3282442 | 0.60861203  | empty        |                      |                                             |
| 3229 H06 | E | 1973   | 2000   | -0.61489688 | 1813   | 1840   | -0.91694895 | 3089502  | 0.89630331  | 3327648 | 0.69076388  | experimental | EMD Bioscienc 406170 | IP3K Inhibitor                              |
| 3229 H07 | X | 2973   | 3000   | 0.57992748  | 3012   | 3040   | 0.61489383  | 2838209  | 0.35375006  | 2787748 | -0.29038428 | experimental | EMD Bioscienc 407900 | 5-Iodotubercidin                            |
| 3229 H08 | E | 1853   | 1880   | -0.7582758  | 1934   | 1960   | -0.76235931 | 3265013  | 1.27523971  | 3393938 | 0.8112312   | experimental | EMD Bioscienc 402320 | KT5720                                      |
| 3229 H09 | X | 2016   | 2040   | -0.56351943 | 2053   | 2080   | -0.61032488 | 2701182  | 0.05790241  | 3427967 | 0.87307134  | experimental | EMD Bioscienc 402320 | KT5720                                      |
| 3229 H10 | E | 1938   | 1960   | -0.65671573 | 2098   | 2120   | -0.55283286 | 3403926  | 1.57515933  | 3603759 | 1.19253442  | empty        |                      |                                             |
| 3229 H11 | X | 1561   | 1580   | -1.14300924 | 2217   | 2240   | -0.61160234 | 27726367 | 0.71263867  | 2428296 | -0.11261342 | experimental | EMD Bioscienc 422709 | KN-92                                       |
| 3229 H12 | E | 1936   | 1960   | -0.65910538 | 2416   | 2440   | -0.45555996 | 2962813  | 0.62278588  | 3208312 | 0.43897274  | experimental | EMD Bioscienc 442006 | LY 294002, 4&prime;-NH2                     |
| 3229 H13 | X | 2452   | 2480   | -0.04257601 | 1891   | 1920   | -0.81729613 | 3175350  | 1.08165313  | 3101039 | 0.11448881  | empty        |                      |                                             |
| 3229 H14 | E | 2089   | 2120   | -0.47629725 | 2292   | 2320   | -0.3049784  | 3268250  | 1.28222854  | 3523599 | 1.04686123  | empty        |                      |                                             |
| 3229 H15 | X | 2052   | 2080   | -0.52050575 | 2852   | 2880   | 0.41047778  | 2428006  | -0.53189726 | 2702432 | -0.44542713 | experimental | EMD Bioscienc 444965 | MEK1/2 Inhibitor II                         |
| 3229 H16 | E | 1766   | 1800   | -0.86222552 | 2002   | 2040   | -0.67548249 | 2906226  | 0.50060192  | 3131307 | 0.33395778  | empty        |                      |                                             |
| 3229 H17 | X | 2294   | 2320   | -0.23135826 | 2614   | 2640   | -0.1064089  | 2978705  | 0.65708745  | 3144936 | 0.35872546  | experimental | EMD Bioscienc 475864 | MK-2 Inhibitor III                          |
| 3229 H18 | E | 1765   | 1780   | -0.86342034 | 2044   | 2080   | -0.61799048 | 2941675  | 0.57713796  | 3371009 | 0.76956285  | experimental | EMD Bioscienc 475880 | ML-7, Hydrochloride                         |
| 3229 H19 | X | 2332   | 2360   | -0.18595494 | 2408   | 2440   | -0.15677676 | 2782828  | 0.118642552 | 3128285 | 0.18745492  | experimental | EMD Bioscienc 475880 | ML-7, Hydrochloride                         |
| 3229 H20 | E | 2243   | 2280   | -0.2922943  | 2088   | 2240   | -0.41229683 | 2957543  | 0.61139771  | 2940379 | -0.01301139 | empty        |                      |                                             |
| 3229 H21 | X | 2653   | 2680   | -0.19758368 | 2208   | 2120   | -0.56560886 | 2692811  | 0.03982903  | 3195856 | 0.45126123  | experimental | EMD Bioscienc 480065 | Necrostatin-1                               |
| 3229 H22 | E | 1881   | 1920   | -0.72482072 | 2207   | 2240   | -0.41357443 | 2852731  | 0.38510373  | 3229025 | 0.51153851  | empty        |                      |                                             |
| 3229 H23 | N | 3036   | 3400   | 0.65520141  | 2606   | 2880   | 0.0961881   | 2806230  | 0.28470592  | 3088860 | 0.2568198   | empty        |                      |                                             |
| 3229 H24 | P | 114308 | 115400 | 133.605697  | 85955  | 86600  | 106.582897  | 2623178  | -0.11051185 | 2665781 | -0.51203217 | empty        |                      |                                             |
| 3229 I01 | D | 1584   | 1600   | -1.07968355 | 1781   | 1800   | -0.95783216 | 2535296  | -0.30025317 | 2444472 | -0.19566388 | DMSO         |                      |                                             |
| 3229 I02 | D | 1897   | 1920   | -0.70570353 | 2217   | 2240   | -0.40709842 | 2838758  | 0.35493538  | 3097411 | 0.27235934  | empty        |                      |                                             |
| 3229 I03 | X | 2687   | 2720   | 0.23820771  | 2204   | 2240   | -0.41740723 | 2371903  | -0.65302624 | 2365538 | -1.05765703 | experimental | EMD Bioscienc 513035 | PD 158780                                   |
| 3229 I04 | X | 3455   | 3480   | 1.15583282  | 3655   | 3680   | 1.43639084  | 3100636  | 0.92034214  | 3311577 | 0.66155841  | experimental | EMD Bioscienc 572635 | SU6656                                      |
| 3229 I05 | X | 1810   | 1840   | -0.80965325 | 1890   | 1920   | -0.81857373 | 2932380  | 0.55706962  | 3021910 | 0.13515307  | experimental | EMD Bioscienc 513040 | PD 174265                                   |
| 3229 I06 | X | 2572   | 2600   | 0.10080291  | 2372   | 2400   | -0.20277037 | 3019177  | 0.74446838  | 3273995 | 0.59326148  | experimental | EMD Bioscienc 361555 | GSK-3 Inhibitor XIII                        |
| 3229 I07 | X | 3608   | 3640   | 1.33864094  | 3290   | 3320   | 0.97006672  | 2930749  | 0.55354822  | 2954509 | 0.01266675  | experimental | EMD Bioscienc 521231 | PDGF Receptor Tyrosine Kinase Inhibitor II  |
| 3229 I08 | X | 2291   | 2320   | -0.23494273 | 2091   | 2120   | -0.56177606 | 3462618  | 1.70187808  | 3147250 | 0.36293064  | experimental | EMD Bioscienc 371957 | Isogranulamide                              |
| 3229 I09 | X | 2533   | 2560   | 0.05420476  | 2413   | 2640   | 0.1051313   | 2376806  | -0.64244043 | 2426096 | -0.94760534 | experimental | EMD Bioscienc 521232 | PDGF Receptor Tyrosine Kinase Inhibitor III |
| 3229 I10 | X | 2888   | 2920   | 0.47836741  | 2411   | 2440   | -0.15294396 | 3088899  | 0.89500141  | 3133349 | 0.33766866  | experimental | EMD Bioscienc 400090 | IC261                                       |
| 3229 I11 | X | 3573   | 3600   | 1.29682209  | 3011   | 3040   | 0.61361623  | 2704163  | 0.06433853  | 2924032 | -0.04271842 | experimental | EMD Bioscienc 521233 | PDGF Receptor Tyrosine Kinase Inhibitor IV  |
| 3229 I12 | X | 2529   | 2560   | 0.04942546  | 2852   | 2880   | 0.41047778  | 2734479  | 0.12979218  | 2836915 | -0.20103419 | experimental | EMD Bioscienc 401481 | IKK-2 Inhibitor I                           |
| 3229 I13 | X | 2885   | 2920   | 0.47478293  | 1849   | 1880   | -0.87095534 | 3177889  | 1.08713945  | 3084064 | 0.24810414  | experimental | EMD Bioscienc 521234 | PDGF RTK Inhibitor                          |
| 3229 I14 | X | 4409   | 4420   | 2.29596525  | 2851   | 2880   | 0.40920018  | 2842608  | 0.3632471   | 2647051 | -0.54606978 | experimental | EMD Bioscienc 402081 | Indirubin Derivative E804                   |
| 3229 I15 | X | 3407   | 3440   | 1.09848125  | 3325   | 3360   | 1.01478273  | 2431225  | -0.52494729 | 2242256 | -1.28169464 | experimental | EMD Bioscienc 527450 | PKR Inhibitor                               |
| 3229 I16 | X | 2889   | 2920   | 0.47956223  | 2090   | 2120   | -0.71454666 | 3200360  | 1.13565088  | 3583236 | 1.15523021  | experimental | EMD Bioscienc 420119 | PKR Inhibitor                               |
| 3229 I17 | X | 3169   | 3200   | 0.81411305  | 2685   | 2720   | 0.19711853  | 2418116  | -0.43882077 | 3050660 | 0.18745492  | experimental | EMD Bioscienc 527455 | PKR Inhibitor, Negative Control             |
| 3229 I18 | X | 3850   | 3880   | 1.62778844  | 3848   | 3880   | 1.6829677   | 3555933  | 1.9033495   | 3594009 | 1.17481574  | experimental | EMD Bioscienc 420123 | JMK                                         |



|          |   |        |        |             |        |        |             |         |             |         |             |              |                      |                                      |
|----------|---|--------|--------|-------------|--------|--------|-------------|---------|-------------|---------|-------------|--------------|----------------------|--------------------------------------|
| 3229 J13 | X | 2492   | 2520   | 0.00521696  | 2973   | 3000   | 0.56506742  | 2979554 | 0.65892048  | 3806497 | 1.56096542  | experimental | EMD Bioscienc 506163 | p38 MAP Kinase Inhibitor VIII        |
| 3229 J14 | X | 2206   | 2240   | -0.3365028  | 2406   | 2440   | -0.15933196 | 3113573 | 0.94827372  | 3466406 | 0.94292567  | empty        |                      |                                      |
| 3229 J15 | X | 1810   | 1840   | -0.80965325 | 3049   | 3080   | 0.66216504  | 2978063 | 0.65570134  | 4478431 | 2.78205599  | experimental | EMD Bioscienc 524611 | PIKfyve Inhibitor                    |
| 3229 J16 | E | 2094   | 2120   | -0.47032313 | 2368   | 2400   | -0.20780078 | 3161731 | 1.05224908  | 3465373 | 0.88634738  | empty        |                      |                                      |
| 3229 J17 | X | 1691   | 1720   | -0.55183739 | 2332   | 2360   | -0.25387439 | 2935624 | 0.35648125  | 1728965 | 0.02985092  | experimental | EMD Bioscienc 526520 | PIM1 Kinase Inhibitor II             |
| 3229 J18 | E | 2209   | 2240   | -0.33291833 | 1847   | 1880   | -0.87351054 | 3034869 | 0.77834813  | 3170023 | 0.4043155   | empty        |                      |                                      |
| 3229 J19 | X | 2932   | 2960   | 0.53093968  | 2327   | 2360   | -0.26026239 | 3030151 | 0.76816175  | 2895027 | -0.09542856 | experimental | EMD Bioscienc 526522 | PIM1 Kinase Inhibitor IV             |
| 3229 J20 | E | 2045   | 2080   | -0.52886953 | 2171   | 2200   | -0.45956804 | 3029773 | 0.76734563  | 3093994 | 0.26614971  | empty        |                      |                                      |
| 3229 J21 | X | 3693   | 3720   | 1.44020101  | 3210   | 3240   | 0.86785869  | 2696661 | 0.04814136  | 3648823 | 1.27442799  | experimental | EMD Bioscienc 526523 | PIM1/2 Kinase Inhibitor V            |
| 3229 J22 | E | 2870   | 2920   | 0.45686057  | 2521   | 2560   | -0.01240793 | 2780259 | 0.22863332  | 3170231 | 0.40469349  | empty        |                      |                                      |
| 3229 J23 | N | 3162   | 3480   | 0.80574928  | 3209   | 3480   | 0.86658109  | 2649322 | -0.05406574 | 2966412 | 0.0342978   | empty        |                      |                                      |
| 3229 J24 | P | 97731  | 98680  | 113.799094  | 87993  | 84400  | 103.820725  | 2679333 | 0.01072594  | 2324474 | 0.68499584  | empty        |                      |                                      |
| 3229 K01 | D | 2263   | 2280   | -0.26839782 | 2342   | 2360   | -0.24109838 | 2457803 | -0.46756415 | 3063905 | 0.21146964  | DMSO         |                      |                                      |
| 3229 K02 | D | 1932   | 1960   | -0.66388468 | 1972   | 2000   | -0.7138105  | 2981298 | 0.66268586  | 3418186 | 0.85529655  | DMSO         |                      |                                      |
| 3229 K03 | X | 2612   | 2640   | 0.14859588  | 2730   | 2760   | 0.25461054  | 2950473 | 0.59613325  | 3741719 | 1.44324581  | experimental | EMD Bioscienc 529574 | PP3                                  |
| 3229 K04 | X | 1374   | 1400   | -1.33059667 | 1414   | 1440   | -1.42671148 | 2708795 | 0.07433923  | 3352846 | 0.73655564  | experimental | EMD Bioscienc 475863 | MK2a Inhibitor                       |
| 3229 K05 | X | 1816   | 1840   | -0.8024843  | 1974   | 2000   | -0.7112553  | 2907345 | 0.50301079  | 3345424 | 0.7230678   | experimental | EMD Bioscienc 529581 | PP1 Analog II, 1NM-PP1               |
| 3229 K06 | X | 2335   | 2360   | -0.18237046 | 2573   | 2600   | 0.05402729  | 3037346 | 0.78369609  | 3325229 | 0.68636788  | experimental | EMD Bioscienc 420135 | JNK Inhibitor VIII                   |
| 3229 K07 | X | 2967   | 3000   | 0.57275853  | 2927   | 2960   | 0.5062978   | 2988317 | 0.6778402   | 3324474 | 0.68499584  | experimental | EMD Bioscienc 539652 | PKCII/JEGFR Inhibitor                |
| 3229 K08 | X | 2453   | 2480   | -0.04138119 | 2532   | 2560   | 0.00164568  | 2165807 | -1.09799707 | 1994796 | -1.73139815 | experimental | EMD Bioscienc 420298 | K-252a, Nocardiopsis sp.             |
| 3229 K09 | X | 2167   | 2200   | -0.38310095 | 2326   | 2360   | -0.26153999 | 2967695 | 0.63331635  | 3389788 | 0.8036895   | experimental | EMD Bioscienc 539654 | PKCb Inhibitor                       |
| 3229 K10 | X | 4572   | 4600   | 2.49045162  | 4212   | 4240   | 2.14801421  | 2925326 | 0.54183971  | 3006779 | 0.10765584  | experimental | EMD Bioscienc 422000 | Kenpaullone                          |
| 3229 K11 | X | 2478   | 2520   | -0.01151058 | 2800   | 2840   | 0.34404256  | 2171736 | -1.08519608 | 2741222 | -0.37493493 | experimental | EMD Bioscienc 553210 | Rapamycin                            |
| 3229 K12 | X | 2214   | 2240   | -0.32694421 | 2531   | 2560   | 0.00036808  | 2373836 | -0.6488528  | 3247111 | 0.5444079   | experimental | EMD Bioscienc 422708 | KM-93                                |
| 3229 K13 | X | 2251   | 2280   | -0.28273571 | 2687   | 2720   | 0.19967373  | 2678262 | 0.00841706  | 3501636 | 1.00694836  | experimental | EMD Bioscienc 555553 | Rho Kinase Inhibitor III, Rockout    |
| 3229 K14 | X | 2854   | 2880   | -0.43774338 | 2609   | 2640   | -0.1000209  | 2444669 | -0.49160297 | 3032600 | 0.72345308  | experimental | EMD Bioscienc 444937 | Rho Kinase Inhibitor IV              |
| 3229 K15 | X | 2453   | 2480   | -0.04138119 | 2609   | 2640   | 0.1000209   | 2846539 | 0.37173492  | 3032600 | 0.72345308  | experimental | EMD Bioscienc 555554 | Rho Kinase Inhibitor IV              |
| 3229 K16 | X | 2613   | 2640   | 0.14979071  | 2291   | 2320   | -0.306256   | 3318765 | 1.39129277  | 3036704 | 0.16203787  | experimental | EMD Bioscienc 444938 | MEK Inhibitor II                     |
| 3229 K17 | X | 2375   | 2400   | -0.13457749 | 2571   | 2600   | 0.05147209  | 2746754 | 0.15629447  | 3187206 | 0.43554178  | experimental | EMD Bioscienc 539648 | Staurosporine, N-benzoyl-            |
| 3229 K18 | X | 2254   | 2280   | -0.27915124 | 2812   | 2840   | 0.35937377  | 3127944 | 0.97930138  | 3901640 | 1.73386665  | experimental | EMD Bioscienc 444939 | MEK 1/2 Inhibitor                    |
| 3229 K19 | X | 2213   | 2240   | -0.32813903 | 2853   | 2880   | 0.41175538  | 2617006 | -0.12383748 | 2824129 | -0.2242699  | experimental | EMD Bioscienc 567805 | Src Kinase Inhibitor I               |
| 3229 K20 | X | 2137   | 2160   | -0.41894568 | 1894   | 1920   | -0.81346333 | 2927563 | 0.5466695   | 3421350 | 0.86104642  | experimental | EMD Bioscienc 454861 | MNK1 Inhibitor                       |
| 3229 K21 | X | 1400   | 1440   | -1.29953123 | 1569   | 1600   | -1.22868343 | 1272296 | -3.0271288  | 1373209 | -2.86099425 | experimental | EMD Bioscienc 572660 | SU16152                              |
| 3229 K22 | P | 5869   | 5900   | 0.92065637  | 2002   | 2040   | -0.67542049 | 2741877 | 0.09015219  | 2915029 | 0.73238066  | experimental | EMD Bioscienc 481406 | NF-KB Activation Inhibitor           |
| 3229 K23 | N | 3373   | 3800   | 1.05785722  | 3001   | 3360   | 0.60084023  | 2550077 | -0.2683403  | 2982755 | 0.06399757  | empty        |                      |                                      |
| 3229 K24 | P | 134112 | 134720 | 157.267999  | 113319 | 114040 | 141.543152  | 2635828 | -0.08319991 | 4151165 | 2.18732284  | empty        |                      |                                      |
| 3229 L01 | D | 2181   | 2200   | -0.36637341 | 2179   | 2200   | -0.44934724 | 2795944 | 0.26249797  | 3177907 | 0.41864292  | DMSO         |                      |                                      |
| 3229 L02 | E | 2491   | 2520   | 0.00402214  | 2248   | 2280   | -0.36119281 | 3257747 | 1.25955208  | 3124404 | 0.32141312  | empty        |                      |                                      |
| 3229 L03 | X | 3812   | 3840   | 1.58238511  | 3692   | 3720   | 1.48366205  | 2821276 | 0.31719093  | 2906542 | -0.07450261 | experimental | EMD Bioscienc 526524 | PIM1/2 Kinase Inhibitor VI           |
| 3229 L04 | E | 2013   | 2040   | -0.56713079 | 1890   | 1920   | -0.81857373 | 3205766 | 1.14732269  | 3028441 | 1.47027121  | empty        |                      |                                      |
| 3229 L05 | X | 1976   | 2000   | -0.61131244 | 2034   | 2060   | -0.61131244 | 2808429 | 0.28032527  | 3682029 | 0.47386433  | experimental | EMD Bioscienc 528111 | PI 3-K&alpha; Inhibitor IV           |
| 3229 L06 | E | 1770   | 1800   | -0.85744622 | 2007   | 2040   | -0.66909449 | 3001286 | 0.70584088  | 3299124 | 0.63892785  | experimental | EMD Bioscienc 528112 | PI 3-K&gamma; Inhibitor              |
| 3229 L07 | X | 3372   | 3400   | 1.05666239  | 3492   | 3520   | 1.22814198  | 3773407 | 2.37288596  | 3603384 | 1.19185272  | experimental | EMD Bioscienc 528112 | PI 3-K&gamma; Inhibitor              |
| 3229 L08 | E | 2326   | 2360   | -0.19312388 | 2325   | 2360   | -0.26281759 | 3337251 | 1.43120491  | 3674534 | 1.32115202  | empty        |                      |                                      |
| 3229 L09 | X | 2094   | 2120   | -0.47032313 | 2293   | 2320   | -0.3037008  | 3045667 | 0.80166151  | 3721500 | 1.40650228  | experimental | EMD Bioscienc 528113 | PI 3-K&beta; Inhibitor VI, TGX-221   |
| 3229 L10 | E | 2121   | 2160   | -0.43806287 | 2242   | 2280   | -0.36885842 | 2935176 | 0.56310632  | 3180416 | 0.42320247  | experimental | EMD Bioscienc 528114 | PI 3-K&beta; Inhibitor VII           |
| 3229 L11 | X | 5175   | 5200   | 3.21093071  | 4133   | 4160   | 2.04708379  | 2948586 | 0.59202027  | 3217926 | 0.49136855  | experimental | EMD Bioscienc 528114 | PI 3-K&gamma; Inhibitor VIII         |
| 3229 L12 | X | 2005   | 2040   | 0.5766625   | 2002   | 2040   | -0.67542049 | 3086553 | 0.09015219  | 2915029 | 0.73238066  | experimental | EMD Bioscienc 528116 | PI 3-K&alpha; Inhibitor VIII         |
| 3229 L13 | X | 2414   | 2440   | -0.08797934 | 2447   | 2480   | 0.65960984  | 2417777 | -0.55398214 | 2934669 | -0.02338800 | experimental | EMD Bioscienc 528116 | PI 3-K&alpha; Inhibitor VIII         |
| 3229 L14 | E | 1931   | 1960   | -0.6650795  | 3005   | 3040   | 0.60595063  | 3172641 | 1.07580428  | 3523604 | 1.04687032  | empty        |                      |                                      |
| 3229 L15 | X | 1894   | 1920   | -0.709288   | 2648   | 2680   | 0.14984731  | 2896828 | 0.4803112   | 3779377 | 1.51168085  | experimental | EMD Bioscienc 528282 | Polo-like Kinase Inhibitor I         |
| 3229 L16 | E | 2135   | 2160   | -0.42133533 | 2450   | 2480   | -0.10311755 | 3015400 | 0.73631366  | 3393623 | 0.81065876  | empty        |                      |                                      |
| 3229 L17 | X | 1896   | 1920   | -0.70689835 | 2490   | 2520   | -0.05201354 | 2765789 | 0.19739192  | 3443837 | 0.90191154  | experimental | EMD Bioscienc 528283 | Polo-like Kinase Inhibitor II, BTO-1 |
| 3229 L18 | E | 1936   | 1960   | -0.65910538 | 2320   | 2320   | -0.306256   | 2703403 | 0.06269765  | 3040691 | 0.16928336  | empty        |                      |                                      |
| 3229 L19 | X | 1929   | 1960   | -0.66746915 | 2296   | 2360   | -0.26153999 | 2110136 | -1.28189334 | 2331299 | -1.1198788  | experimental | EMD Bioscienc 539644 | UCN-01                               |
| 3229 L20 | E | 2016   | 2040   | -0.56351943 | 2212   | 2240   | -0.40718643 | 2715860 | 0.08959289  | 3040009 | 0.16804398  | empty        |                      |                                      |
| 3229 L21 | X | 1967   | 2000   | -0.62065883 | 2528   | 2560   | -0.00346472 | 2770658 | 0.20790432  | 3228225 | 0.51008469  | experimental | EMD Bioscienc 551590 | Quercetagenin                        |
| 3229 L22 | E | 2440   | 2480   | -0.0569139  | 2247   | 2280   | -0.36247041 | 2735376 | 0.13172884  | 3177439 | 0.41779243  | empty        |                      |                                      |
| 3229 L23 | N | 3300   | 3640   | 0.97063504  | 3026   | 3520   | 0.63278023  | 2930488 | 0.55298471  | 2777798 | -0.30846619 | empty        |                      |                                      |
| 3229 L24 | P | 106973 | 107680 | 124.84166   | 160580 | 161400 | 201.923821  | 2579944 | -0.20385606 | 3422133 | 0.86246935  | empty        |                      |                                      |
| 3229 M01 | D | 1823   | 1840   | -0.79412053 | 2578   | 2600   | 0.06041529  | 2393320 | -0.60678594 | 2923016 | -0.04456478 | DMSO         |                      |                                      |
| 3229 M02 | D | 1855   | 1880   | -0.75588615 | 2932   | 2960   | 0.5126858   | 2579387 | -0.20505865 | 3874378 | 1.68432403  | empty        |                      |                                      |
| 3229 M03 | X | 2332   | 2360   | -0.18595494 | 2646   | 2680   | 0.14729211  | 2554627 | -0.25851664 | 2764166 | -0.33323933 | experimental | EMD Bioscienc 574711 | Syk Inhibitor                        |
| 3229 M04 | X | 1893   | 1920   | -0.71048283 | 2771   | 2800   | 0.30699215  | 2846160 | 0.37091664  | 3031902 | 0.15331131  | experimental | EMD Bioscienc 506121 | p38 MAP Kinase Inhibitor III         |
| 3229 M05 | X | 2736   | 2760   | 0.2967541   | 3089   | 3120   | 0.71326905  | 2339128 | -0.72378899 | 2773495 | -0.31628593 | experimental | EMD Bioscienc 574712 | Syk Inhibitor II                     |
| 3229 M06 | X | 2415   | 2440   | -0.08678451 | 2852   | 2880   | 0.41047778  | 3206488 | 1.14888152  | 3484975 | 0.9766707   | experimental | EMD Bioscienc 506126 | p38 MAP Kinase Inhibitor             |
| 3229 M07 | X | 2326   | 2360   | -0.19312388 | 2365   | 2400   | -0.21171358 | 3220575 | 1.17929601  | 3048576 | 0.18361259  | experimental | EMD Bioscienc 574713 | Syk Inhibitor III                    |
| 3229 M08 | X | 3693   | 3720   | 1.44020101  | 3652   | 3680   | 1.43255803  | 2816399 | 0.30666126  | 3007560 | 0.10907514  | experimental | EMD Bioscienc 513000 | PD98059                              |
| 3229 M09 | X | 2093   | 2120   | -0.47151796 | 2209   | 2240   | -0.41101923 | 2405761 | -0.57992525 | 3281958 | 0.60773246  | experimental | EMD Bioscienc 616451 | TGF- $\beta$ RI Kinase Inhibitor     |
| 3229 M10 | X | 1736   | 1760   | -0.13702312 | 2374   | 2400   | -0.2021517  | 285741  | -0.41819293 | 3031143 | 0.93881318  | experimental | EMD Bioscienc 513030 | PD 169316                            |
| 3229 M11 | X | 1925   | 1960   | -0.67223812 | 2343   | 2380   | -0.36758082 | 2364952 | -0.68803377 | 3228850 | 0.51232042  | experimental | EMD Bioscienc 616453 | TGF- $\beta$ RI Inhibitor III        |
| 3229 M12 | X | 2294   | 2320   | -0.23135826 | 3132   | 3160   | 0.76820587  | 2524038 | -0.32455971 | 2771930 | -0.31912997 | experimental | EMD Bioscienc 559396 | SB 220025                            |
| 3229 M13 | X | 2812   | 2840   | 0.38756076  |        |        |             |         |             |         |             |              |                      |                                      |

|          |   |        |        |             |        |        |             |         |             |         |             |              |               |          |                                            |
|----------|---|--------|--------|-------------|--------|--------|-------------|---------|-------------|---------|-------------|--------------|---------------|----------|--------------------------------------------|
| 3229 N07 | X | 2171   | 2200   | -0.37832166 | 1849   | 1880   | -0.87095534 | 3246635 | 1.23556076  | 3422869 | 0.86380686  | experimental | EMD Bioscienc | 555550   | Rho Kinase Inhibitor                       |
| 3229 N08 | X | 2492   | 2520   | -0.00521696 | 2491   | 2520   | -0.05073594 | 2962444 | 0.62197919  | 3238439 | 0.52864636  | empty        |               |          |                                            |
| 3229 N09 | X | 1813   | 1840   | -0.80668878 | 2373   | 2400   | -0.20149277 | 3037540 | 0.78411494  | 3232368 | 0.51761367  | experimental | EMD Bioscienc | 555551   | Rho Kinase Inhibitor II                    |
| 3229 N10 | X | 2175   | 2200   | -0.37354236 | 2051   | 2200   | -0.61288008 | 2925338 | 0.54186568  | 3545968 | 1.08751139  | empty        |               |          |                                            |
| 3229 N11 | X | 1150   | 1160   | 0.76870972  | 2302   | 3120   | 0.71710186  | 3117762 | 0.95731797  | 3306973 | 0.65319166  | experimental | EMD Bioscienc | 555555   | Rho Kinase Inhibitor V                     |
| 3229 N12 | E | 2213   | 2240   | -0.32813903 | 1647   | 1680   | -1.12903061 | 2619704 | -0.11801238 | 3128669 | 0.32916381  | empty        |               |          |                                            |
| 3229 N13 | X | 2290   | 2320   | -0.23613756 | 2649   | 2680   | 0.15112491  | 3002461 | 0.70837776  | 3175301 | 0.41390709  | experimental | EMD Bioscienc | 557360   | Roscovitine                                |
| 3229 N14 | E | 2002   | 2040   | -0.58024697 | 2283   | 2320   | -0.31647688 | 2950042 | 0.5952027   | 3258861 | 0.56575888  | empty        |               |          |                                            |
| 3229 N15 | X | 2894   | 2920   | 0.48553635  | 2765   | 2800   | 0.29932655  | 2714757 | 0.08721146  | 3498199 | 1.00070238  | experimental | EMD Bioscienc | 557362   | Roscovitine, (S)-Isomer                    |
| 3229 N16 | E | 1971   | 2000   | -0.61728653 | 2468   | 2440   | -0.15677676 | 2720310 | 0.09920065  | 3072983 | 0.22796689  | empty        |               |          |                                            |
| 3229 N17 | X | 2693   | 2720   | 0.24537666  | 2650   | 2680   | 0.15240251  | 1610279 | -2.29740781 | 1515010 | -2.60330248 | experimental | EMD Bioscienc | 557520   | Ro-31-8220                                 |
| 3229 N18 | X | 2414   | 2440   | -0.08797934 | 2053   | 2080   | -0.61032488 | 2886871 | 0.45881358  | 3349449 | 0.34519583  | empty        |               |          |                                            |
| 3229 N19 | X | 2125   | 2160   | -0.43328358 | 2008   | 2040   | -0.66781689 | 3352872 | 1.46493137  | 3246942 | 0.54409867  | experimental | EMD Bioscienc | 559285   | RSK Inhibitor, SL0101                      |
| 3229 N20 | E | 2332   | 2360   | -0.18595494 | 1804   | 1840   | -0.92844736 | 2886857 | 0.45878335  | 3192421 | 0.44501888  | empty        |               |          |                                            |
| 3229 N21 | X | 1966   | 2000   | -0.62326065 | 2127   | 2160   | -0.51578245 | 3241481 | 1.02443303  | 3523373 | 1.04645053  | experimental | EMD Bioscienc | 559399   | SB 203580, Sulfone                         |
| 3229 N22 | E | 2207   | 2240   | -0.33530798 | 2485   | 2520   | -0.05840154 | 2786916 | 0.24300609  | 2755873 | -0.34831    | empty        |               |          |                                            |
| 3229 N23 | N | 4166   | 4600   | 2.00535293  | 4442   | 4960   | 2.44186229  | 2835529 | 0.34796382  | 3063532 | 0.21079118  | empty        |               |          |                                            |
| 3229 N24 | P | 139714 | 140488 | 163.961405  | 167816 | 168760 | 211.168537  | 2477479 | -0.42508275 | 3351871 | 0.73478379  | empty        |               |          |                                            |
| 3229 O01 | D | 2021   | 2040   | -0.55754531 | 2380   | 2400   | -0.19254957 | 2237580 | -0.94303583 | 2548850 | -0.72452825 | DMSO         |               |          |                                            |
| 3229 O02 | D | 2535   | 2560   | 0.05659441  | 2253   | 2280   | -0.35480481 | 2663809 | -0.02278763 | 2994531 | 0.08539783  | DMSO         |               |          |                                            |
| 3229 O03 | X | 2216   | 2240   | -0.32455456 | 2171   | 2200   | -0.45956804 | 2349481 | -0.70143638 | 2608285 | -0.61651836 | experimental | EMD Bioscienc | 658552   | AG 1478                                    |
| 3229 O04 | X | 1773   | 1800   | -0.85386175 | 2290   | 2320   | -0.30753326 | 3085765 | 0.88823496  | 3300903 | 0.64216079  | experimental | EMD Bioscienc | 559389   | SB 203580                                  |
| 3229 O05 | X | 3097   | 3120   | 0.7280857   | 3694   | 3720   | 1.48621725  | 2375636 | -0.64496652 | 2711894 | -0.42823205 | experimental | EMD Bioscienc | 676480   | VEGF Receptor 2 Kinase Inhibitor I         |
| 3229 O06 | X | 2091   | 2120   | -0.47309076 | 2006   | 2040   | -0.67037209 | 2390039 | -0.61386977 | 2738252 | -0.38033225 | experimental | EMD Bioscienc | 6731970  | HA 1077, Dihydrochloride Fasudil           |
| 3229 O07 | X | 3376   | 3400   | 1.06144169  | 3694   | 3720   | 1.48621725  | 2569439 | -0.22653684 | 2874265 | -0.13315887 | experimental | EMD Bioscienc | 676481   | VEGF Receptor Tyrosine Kinase Inhibitor II |
| 3229 O08 | X | 2069   | 2100   | -0.61967618 | 2127   | 2160   | -0.51578245 | 3241481 | -0.41295322 | 3128669 | 0.33156268  | experimental | EMD Bioscienc | 559402   | SB 218078                                  |
| 3229 O09 | X | 2332   | 2360   | -0.18595494 | 2493   | 2520   | -0.46180774 | 8333024 | 0.45881358  | 2086774 | 0.56424132  | experimental | EMD Bioscienc | 676483   | VEGR Tyrosine Kinase Inhibitor IV          |
| 3229 O10 | X | 2131   | 2160   | -0.42611463 | 2170   | 2200   | -0.46084564 | 2980795 | 0.66159986  | 3202057 | 0.46253017  | experimental | EMD Bioscienc | 565625   | SC-68376                                   |
| 3229 O11 | X | 3731   | 3760   | 1.48560434  | 3611   | 3640   | 1.38017642  | 2286154 | -0.83816231 | 2857648 | -0.16335658 | experimental | EMD Bioscienc | 676485   | VEGF Receptor 2 Kinase Inhibitor II        |
| 3229 O12 | X | 1647   | 1680   | -1.00440962 | 2368   | 2400   | -0.20788078 | 3157716 | 1.04358051  | 2662496 | -0.51800192 | experimental | EMD Bioscienc | 567305   | SKF-86002                                  |
| 3229 O13 | X | 3168   | 3200   | 0.81291823  | 3209   | 3240   | 0.86658109  | 2049237 | -1.34967711 | 2451680 | -0.90111311 | experimental | EMD Bioscienc | 676487   | VEGF Receptor 2 Kinase Inhibitor III       |
| 3229 O14 | X | 5170   | 5200   | 0.20495659  | 3645   | 3680   | 1.42361483  | 2345624 | -0.70976382 | 2941180 | -0.01155575 | experimental | EMD Bioscienc | 569413   | Sphingosine Kinase Inhibitor               |
| 3229 O15 | X | 2564   | 2600   | 0.09124432  | 4446   | 4480   | 2.44697269  | 2485617 | -0.40751243 | 2995093 | 0.08641914  | experimental | EMD Bioscienc | 676489   | VEGF Receptor 2 Kinase Inhibitor IV        |
| 3229 O16 | X | 3133   | 3160   | 0.77109937  | 3009   | 3120   | 0.24698074  | 1517845 | -0.01370787 | 2724    | -0.47217078 | experimental | EMD Bioscienc | 569397   | Staurosporine, Streptomycetes sp.          |
| 3229 O18 | X | 1890   | 1920   | -0.7140673  | 2370   | 2400   | -0.20532557 | 3209296 | 1.15494412  | 2750436 | -0.35819054 | experimental | EMD Bioscienc | 570250   | DNA-PK Inhibitor V                         |
| 3229 O19 | X | 3011   | 3040   | 0.62533008  | 2964   | 3000   | 0.55356901  | 2051029 | -1.34580801 | 2259791 | -1.24982868 | experimental | EMD Bioscienc | 189405   | STO-609                                    |
| 3229 O20 | X | 3333   | 3360   | 1.01006424  | 5453   | 5480   | 3.73351621  | 2448565 | -0.48750942 | 2859959 | -0.15099142 | experimental | EMD Bioscienc | 572650   | Aurora Kinase Inhibitor III                |
| 3229 O21 | X | 1966   | 2000   | -0.62326065 | 2004   | 2040   | -0.67292729 | 1304913 | -2.95670718 | 1177133 | -3.21731877 | experimental | EMD Bioscienc | 569397   | SU9516                                     |
| 3229 O22 | X | 2651   | 2680   | 0.19519403  | 2689   | 2720   | 0.20222893  | 1315077 | -1.16434457 | 2461466 | -0.96568825 | experimental | EMD Bioscienc | 616373   | Staurosporine, Streptomycetes sp.          |
| 3229 O23 | N | 3324   | 3600   | 0.999931083 | 3315   | 3310   | 1.00200673  | 2457316 | -0.4661562  | 2457316 | -0.62991363 | empty        |               |          | Tp12 Kinase Inhibitor                      |
| 3229 O24 | P | 153182 | 153920 | 180.053299  | 154447 | 155440 | 194.088328  | 3412494 | 1.59365804  | 4067193 | 2.03472241  | empty        |               |          |                                            |
| 3229 P01 | D | 2347   | 2360   | -0.16803257 | 2345   | 2360   | -0.23726558 | 2487221 | -0.40404932 | 2454739 | -0.89555406 | DMSO         |               |          |                                            |
| 3229 P02 | E | 2380   | 2400   | -0.12860337 | 2658   | 2680   | 0.16262332  | 2578960 | -0.20598056 | 2729171 | -0.39683494 | empty        |               |          |                                            |
| 3229 P03 | X | 1941   | 1960   | -0.65313126 | 2899   | 2920   | 0.47052499  | 2555559 | -0.25650441 | 3000847 | 0.09687575  | experimental | EMD Bioscienc | 559404   | SB 239063                                  |
| 3229 P04 | E | 1903   | 1920   | -0.69853458 | 2378   | 2400   | -0.19510477 | 2523079 | -0.32663024 | 2698869 | -0.45190209 | empty        |               |          |                                            |
| 3229 P05 | X | 2100   | 2120   | -0.46315419 | 2176   | 2200   | -0.45318004 | 2507342 | -0.36060715 | 2350730 | -1.08456728 | experimental | EMD Bioscienc | 565715   | Scytonein, Lyngbya sp.                     |
| 3229 P06 | E | 1982   | 1800   | -0.84310833 | 2300   | 2320   | -0.9475776  | 2392747 | -0.17621379 | 2970065 | -0.04093632 | empty        |               |          |                                            |
| 3229 P07 | X | 1978   | 2000   | -0.60892276 | 2775   | 2800   | 0.31210253  | 2475856 | -0.42858689 | 2762876 | -0.3355836  | experimental | EMD Bioscienc | 569615   | Stem-Cell Factor/c-Kit Inhibitor, ISCK03   |
| 3229 P08 | E | 2298   | 2320   | -0.22657896 | 2498   | 2520   | -0.04179273 | 2712641 | 0.08264292  | 3083523 | 0.24712099  | empty        |               |          |                                            |
| 3229 P09 | E | 3501   | 3520   | 0.21079474  | 2500   | 2520   | -0.03923753 | 2884901 | 0.45456026  | 2673157 | -0.49862793 | empty        |               |          |                                            |
| 3229 P10 | E | 1775   | 1800   | -0.8514721  | 2220   | 2040   | -0.65248569 | 2533140 | -0.30490807 | 2670815 | -0.50288399 | empty        |               |          |                                            |
| 3229 P11 | X | 3078   | 3080   | 0.68148755  | 2056   | 2280   | -0.35097201 | 2194159 | -1.03678379 | 2307950 | -1.16231041 | experimental | EMD Bioscienc | 616404   | Tp12 Kinase Inhibitor II                   |
| 3229 P12 | E | 2181   | 2200   | -0.36637341 | 2541   | 2560   | 0.01314408  | 2476044 | -0.42818099 | 3007383 | 0.10875348  | empty        |               |          |                                            |
| 3229 P13 | X | 1857   | 1880   | -0.7534965  | 1977   | 2000   | -0.7074225  | 2086205 | -1.26986148 | 1957590 | -1.79901178 | experimental | EMD Bioscienc | 655203   | TX-1918                                    |
| 3229 P14 | E | 2453   | 2480   | -0.04138119 | 2096   | 2120   | -0.55388006 | 2456613 | -0.47011342 | 2639682 | -0.55946129 | empty        |               |          |                                            |
| 3229 P15 | X | 2180   | 2200   | -0.36756824 | 2534   | 2560   | 0.00420088  | 2308470 | -0.78998013 | 2831390 | -0.21107465 | experimental | EMD Bioscienc | 681500   | WHI-P180, Hydrochloride                    |
| 3229 P16 | E | 1900   | 1920   | -0.70211906 | 2336   | 2360   | -0.24876399 | 2530100 | -0.31147157 | 2517619 | -0.78128364 | empty        |               |          |                                            |
| 3229 P17 | X | 2580   | 2600   | 0.1103615   | 2818   | 2840   | 0.36703937  | 2006888 | -1.44111057 | 2251135 | -1.26555904 | experimental | EMD Bioscienc | 681637   | Weel/Chk1 Inhibitor                        |
| 3229 P18 | E | 1700   | 1720   | -0.94108393 | 2337   | 2360   | -0.24748639 | 2505523 | -0.36453446 | 2640197 | -0.5585254  | empty        |               |          |                                            |
| 3229 P19 | X | 2460   | 2480   | -0.03301742 | 2537   | 2560   | 0.00803368  | 1941170 | -1.58299878 | 2130080 | -1.48554957 | experimental | EMD Bioscienc | 681640   | Weel1 Inhibitor                            |
| 3229 P20 | E | 1972   | 2000   | -0.6160917  | 2451   | 2480   | -0.10183995 | 2429808 | -0.52800666 | 2656025 | -0.52976153 | empty        |               |          |                                            |
| 3229 P21 | X | 3663   | 3680   | 1.40435628  | 2300   | 2120   | -0.55027765 | 2114396 | -1.20899581 | 2126881 | -1.49136304 | experimental | EMD Bioscienc | 681641   | Weel1 Inhibitor II                         |
| 3229 P22 | E | 1933   | 1960   | -0.66268985 | 2214   | 2240   | -0.40463128 | 2303625 | -0.80044161 | 2527522 | -0.76328715 | empty        |               |          |                                            |
| 3229 P23 | N | 2743   | 3080   | 0.30511787  | 3769   | 4280   | 1.58203727  | 2323116 | -0.75835964 | 2802179 | -0.26415914 | empty        |               |          |                                            |
| 3229 P24 | P | 110065 | 110520 | 128.536057  | 170018 | 170480 | 213.981813  | 2110290 | -1.21786085 | 2496411 | -0.81982447 | empty        |               |          |                                            |
| 3244 A01 | E | 2229   | 2240   | -0.7539853  | 2866   | 2880   | -0.78473463 | 2073081 | -1.12946068 | 1883425 | -1.28555041 | empty        |               |          |                                            |
| 3244 A02 | E | 1867   | 1880   | -1.17434607 | 2260   | 2280   | -1.25133897 | 2328223 | -0.70703164 | 2254035 | -0.76676109 | empty        |               |          |                                            |
| 3244 A03 | X | 706    | 720    | -2.52252008 | 1222   | 1240   | -2.05057213 | 1123589 | -2.70149896 | 1181052 | -2.26875002 | experimental | SYNthesis     | SYN-1025 | Bosutinib (10 mM)                          |
| 3244 A04 | X | 1181   | 1200   | -1.97094157 | 1293   | 1320   | -1.99590767 | 1242388 | -2.50331782 | 1223357 | -2.20950325 | experimental | SYNthesis     | SYN-1025 | Bosutinib (3.33 mM)                        |
| 3244 A05 | X | 2320   | 2320   | -0.67153871 | 3301   | 3320   | -0.44979588 | 1706199 | -0.74823494 | 1592682 | -1.69253986 | experimental | SYNthesis     | SYN-1035 | Dasatinib (3.33 mM)                        |
| 3244 A06 | X | 3181   | 3200   | 0.35149428  | 2576   | 2600   | -1.00802713 | 1898685 | -1.41820159 | 1756185 | -1.46366642 | experimental | SYNthesis     | SYN-1036 | Dasatinib (3.33 mM)                        |
| 3244 A07 | X | 2059   | 2080   | -0.95139223 | 218    |        |             |         |             |         |             |              |               |          |                                            |



|          |   |        |        |             |        |        |             |           |             |          |             |              |           |          |                                           |
|----------|---|--------|--------|-------------|--------|--------|-------------|-----------|-------------|----------|-------------|--------------|-----------|----------|-------------------------------------------|
| 3244 E19 | X | 3647   | 3680   | 0.89262183  | 4446   | 4480   | 0.43182453  | 2668950   | -0.14290273 | 2779488  | -0.0312186  | experimental | SYNthesis | SYN-1113 | SMI-4a (10 mM)                            |
| 3244 E20 | X | 3647   | 3680   | 0.89262183  | 3926   | 3960   | 0.03143797  | 3250014   | 0.81914314  | 3835258  | 1.44667514  | experimental | SYNthesis | SYN-1113 | SMI-4a (3.33 mM)                          |
| 3244 E21 | X | 2331   | 2360   | -0.63554096 | 2205   | 2240   | -1.29368754 | 1728208   | -1.70045397 | 1638869  | -1.62788612 | experimental | SYNthesis | SYN-1021 | Bisindolylmaleimide X, HCl salt (10 mM)   |
| 3244 E22 | X | 2130   | 2160   | -0.86894576 | 2928   | 2960   | -0.73698623 | 2372837   | -0.63116591 | 3110955  | 0.43011208  | experimental | SYNthesis | SYN-1021 | Bisindolylmaleimide X, HCl salt (3.33 mM) |
| 3244 E23 | N | 3294   | 3260   | 0.4827119   | 3204   | 3560   | -0.52448263 | 28270471  | 0.19074803  | 2822477  | 0.0289585   | empty        |           |          |                                           |
| 3244 E24 | P | 150463 | 151440 | 171.377992  | 112896 | 113320 | 83.9355211  | 2937233   | 0.30128337  | 2973305  | 0.24009138  | empty        |           |          |                                           |
| 3244 F01 | E | 1541   | 1560   | -1.55290311 | 2450   | 2480   | -1.10504388 | 2948921   | 0.32063475  | 3254312  | 0.63345213  | empty        |           |          |                                           |
| 3244 F02 | E | 1780   | 1800   | -1.27537203 | 2449   | 2480   | -1.10581385 | 2997816   | 0.40158837  | 2887379  | 0.11980997  | empty        |           |          |                                           |
| 3244 F03 | X | 1775   | 1800   | -1.28117812 | 2451   | 2480   | -1.1042739  | 2833190   | 0.12902328  | 2736799  | -0.09097575 | W            | SYNthesis | SYN-1115 | GNE-493 (1.11 mM)                         |
| 3244 F04 | X | 2458   | 2480   | -0.48806628 | 2491   | 2520   | -1.07347494 | 2723731   | -0.05220388 | 2702334  | -0.13922073 | experimental | SYNthesis | SYN-1114 | GNE-490 (10 mM)                           |
| 3244 F05 | X | 1655   | 1680   | -1.42052427 | 2690   | 2720   | -0.92025008 | 2968277   | 0.35268176  | 3198555  | 0.55542026  | experimental | SYNthesis | SYN-1045 | IC87114 (1.11 mM)                         |
| 3244 F06 | X | 1696   | 1720   | -1.37291434 | 2365   | 2400   | -1.17049168 | 1686034   | -1.77027988 | 1761416  | -1.42189201 | experimental | SYNthesis | SYN-1019 | BI-2536 (R-) (10 mM)                      |
| 3244 F07 | X | 2096   | 2120   | -0.90842717 | 2726   | 2760   | -0.89253101 | 2424269   | -0.54801188 | 2340580  | -0.64561319 | experimental | SYNthesis | SYN-1067 | PIK-75 (1.11 mM)                          |
| 3244 F08 | X | 1975   | 2000   | -1.04893454 | 2645   | 2680   | -0.95489892 | 2859927   | 0.17329073  | 3122308  | 0.44866957  | experimental | SYNthesis | SYN-1114 | GNE-490 (3.33 mM)                         |
| 3244 F09 | X | 1898   | 1920   | -1.13834832 | 2532   | 2560   | -1.041906   | 3261751   | 0.83857565  | 3523245  | 1.00991139  | W            | SYNthesis | SYN-1068 | PIK-90 (1.11 mM)                          |
| 3244 F10 | X | 1976   | 2000   | -1.04777332 | 2448   | 2480   | -1.10658383 | 2583603   | -0.28420856 | 2654744  | -0.20583843 | W            | SYNthesis | SYN-1019 | BI-2536 (R-) (3.33 mM)                    |
| 3244 F11 | X | 2095   | 2120   | -0.90958839 | 2407   | 2440   | -1.13815277 | 3187048   | 0.71489269  | 3155663  | 0.49536075  | experimental | SYNthesis | SYN-1065 | PI-103 (1.11 mM)                          |
| 3244 F12 | X | 2576   | 2600   | -0.35104256 | 1932   | 1960   | -1.50389049 | 3350751   | 0.98592961  | 3231616  | 0.60168169  | W            | SYNthesis | SYN-1114 | GNE-490 (1.11 mM)                         |
| 3244 F13 | X | 2015   | 2040   | -1.00248582 | 2171   | 2200   | -1.31986667 | 3309510   | 0.91764843  | 3450960  | 0.90872501  | experimental | SYNthesis | SYN-1098 | PIK-294 (1.11 mM)                         |
| 3244 F14 | X | 1935   | 1960   | -1.09538325 | 2692   | 2720   | -0.91871013 | 3115612   | 0.59661879  | 3112736  | 0.43527044  | experimental | SYNthesis | SYN-1019 | BI-2536 (R-) (1.11 mM)                    |
| 3244 F15 | X | 2459   | 2480   | -0.48690506 | 2334   | 2360   | -1.19436088 | 3987890   | 2.04081675  | 3300425  | 0.69800228  | experimental | SYNthesis | SYN-1089 | TGX221 (1.11 mM)                          |
| 3244 F16 | E | 1936   | 1960   | -1.09422204 | 2212   | 2240   | -1.28829772 | 3587226   | 1.37745239  | 3355611  | 0.77525305  | empty        |           |          |                                           |
| 3244 F17 | X | 2129   | 2160   | -0.87010698 | 2565   | 2600   | -1.01649685 | 4130595   | 2.27708806  | 3783777  | 1.37461072  | experimental | SYNthesis | SYN-1094 | YM201636 (1.11 mM)                        |
| 3244 F18 | X | 2247   | 2280   | -0.73308326 | 2445   | 2480   | -1.10889375 | 3081606   | 0.54031633  | 2917113  | 0.23758289  | empty        |           |          |                                           |
| 3244 F19 | X | 2884   | 2920   | 0.00661256  | 2680   | 2720   | -0.92794982 | 3434215   | 1.12411782  | 2917895  | 0.16252705  | experimental | SYNthesis | SYN-1113 | SMI-4a (1.11 mM)                          |
| 3244 F20 | E | 2086   | 2120   | -0.92003835 | 2522   | 2560   | -1.04966754 | 28974232  | 0.28973352  | 34081362 | 0.13492557  | empty        |           |          |                                           |
| 3244 F21 | X | 1759   | 1760   | -1.37626894 | 2648   | 2680   | -0.952589   | 2655990   | -0.16278022 | 2874433  | 0.10169482  | experimental | SYNthesis | SYN-1021 | Bisindolylmaleimide X, HCl salt (1.11 mM) |
| 3244 F22 | E | 1728   | 1760   | -1.33575536 | 2483   | 2520   | -1.07963473 | 2795203   | 0.06612963  | 3277613  | 0.66606947  | empty        |           |          |                                           |
| 3244 F23 | N | 3379   | 3880   | 0.58141543  | 3340   | 3600   | -0.41976688 | 3268814   | 0.85026959  | 2767358  | -0.04819848 | empty        |           |          |                                           |
| 3244 F24 | P | 161932 | 162920 | 184.696001  | 78623  | 79160  | 57.546197   | 2687394   | -0.11236569 | 2647352  | -0.21618594 | empty        |           |          |                                           |
| 3244 G01 | E | 1703   | 1720   | -1.36478581 | 4374   | 4400   | 0.37638639  | 2557719   | -0.32706372 | 3043847  | 0.33883786  | empty        |           |          |                                           |
| 3244 G02 | E | 1738   | 1760   | -1.32414318 | 2763   | 2800   | -0.86404197 | 2758953   | 0.06611186  | 3123434  | 0.45024577  | empty        |           |          |                                           |
| 3244 G03 | X | 1736   | 1760   | -1.32646562 | 2168   | 2200   | -1.32217659 | 2538112   | -0.3595263  | 2526784  | -0.38496009 | W            | SYNthesis | SYN-1016 | AZD6244 (10 mM)                           |
| 3244 G04 | X | 2264   | 2280   | -0.72495474 | 2171   | 2200   | -0.81781521 | 416514850 | 0.36976317  | 48481961 | 0.24848196  | experimental | SYNthesis | SYN-1066 | AZD6244 (3.33 mM)                         |
| 3244 G05 | X | 1855   | 1880   | -1.18828069 | 3126   | 3160   | -0.58454135 | 2332276   | -0.70032124 | 2715325  | -0.12103556 | experimental | SYNthesis | SYN-1031 | CI-1040 (10 mM)                           |
| 3244 G06 | X | 2577   | 2600   | -0.34988135 | 3124   | 3160   | -0.5860813  | 2800720   | 0.07526392  | 2899244  | 0.1364189   | experimental | SYNthesis | SYN-1031 | CI-1040 (3.33 mM)                         |
| 3244 G07 | X | 1892   | 1920   | -1.14531562 | 2725   | 2760   | -0.89330099 | 2540771   | -0.35512389 | 2318129  | -0.67704068 | experimental | SYNthesis | SYN-1059 | PD0325901 (10 mM)                         |
| 3244 G08 | X | 2214   | 2240   | -0.77140345 | 2607   | 2640   | -0.98415794 | 3151158   | 0.65547097  | 3413057  | 0.85566743  | experimental | SYNthesis | SYN-1059 | PD0325901 (3.33 mM)                       |
| 3244 G09 | X | 1815   | 1840   | -1.2347294  | 2328   | 2360   | -1.19898072 | 2725580   | -0.04914256 | 2616034  | -0.26002567 | W            | SYNthesis | SYN-1047 | JN33877605 (10 mM)                        |
| 3244 G10 | X | 2015   | 2040   | -1.00248582 | 2287   | 2320   | -1.23054966 | 3500671   | 1.23414653  | 2970456  | 0.23610327  | experimental | SYNthesis | SYN-1047 | JN33877605 (3.33 mM)                      |
| 3244 G11 | X | 2174   | 2200   | -0.81781521 | 2487   | 2520   | -0.81781521 | 416514850 | 0.36976317  | 48481961 | 0.24848196  | W            | SYNthesis | SYN-1060 | PF04217903 (1.11 mM)                      |
| 3244 G12 | X | 1972   | 2000   | -0.5241819  | 2487   | 2520   | -1.07655483 | 3116304   | 0.68054763  | 3999028  | 1.67592456  | experimental | SYNthesis | SYN-1040 | PF04217903 (3.33 mM)                      |
| 3244 G13 | X | 1973   | 2000   | -1.05125697 | 2727   | 2760   | -0.89176104 | 4056433   | 2.15430082  | 4297829  | 2.09419381  | experimental | SYNthesis | SYN-1050 | KU0063794 (10 mM)                         |
| 3244 G14 | X | 2179   | 2200   | -0.81204608 | 2888   | 2920   | -0.7677952  | 3367379   | 1.01345996  | 3863668  | 1.48644418  | experimental | SYNthesis | SYN-1050 | KU0063794 (3.33 mM)                       |
| 3244 G15 | X | 894    | 920    | -2.30421111 | 1648   | 1680   | -1.72256315 | 1314217   | -2.38858333 | 1388499  | -1.97836043 | experimental | SYNthesis | SYN-1026 | BX795 (10 mM)                             |
| 3244 G16 | X | 1373   | 1400   | -1.47498773 | 2044   | 2080   | -1.41765338 | 1415420   | -2.21832532 | 1409206  | -1.94937424 | experimental | SYNthesis | SYN-1026 | BX795 (3.33 mM)                           |
| 3244 G17 | X | 4130   | 4160   | 1.45349009  | 4442   | 4480   | -0.42874463 | 1810681   | -1.56390651 | 1792552  | -1.41275675 | experimental | SYNthesis | SYN-1027 | BX912 (10 mM)                             |
| 3244 G18 | X | 3760   | 3800   | 1.02383966  | 4568   | 4600   | 0.21007197  | 2470037   | -0.47223552 | 3188283  | 0.61103321  | experimental | SYNthesis | SYN-1027 | BX912 (3.33 mM)                           |
| 3244 G19 | X | 4359   | 4400   | 0.19408999  | 4156   | 4200   | 0.20853202  | 3368732   | 0.71940885  | 3188283  | 0.61103322  | experimental | SYNthesis | SYN-1009 | AS-252424 (10 mM)                         |
| 3244 G20 | X | 3327   | 3360   | 0.5210321   | 3839   | 3880   | -0.03554978 | 3083102   | 0.5427932   | 2863530  | 0.08642554  | experimental | SYNthesis | SYN-1009 | AS-252424 (3.33 mM)                       |
| 3244 G21 | X | 2526   | 2560   | -0.40910346 | 3640   | 3680   | -0.18877464 | 2358436   | -0.65700911 | 2223865  | -0.80899382 | experimental | SYNthesis | SYN-1018 | BEZ-235 (10 mM)                           |
| 3244 G22 | X | 3245   | 3280   | 0.42581223  | 3360   | 3400   | -0.4043674  | 2504640   | -0.41494463 | 2311608  | -0.68616894 | experimental | SYNthesis | SYN-1018 | BEZ-235 (3.33 mM)                         |
| 3244 G23 | N | 4145   | 4720   | 1.47090836  | 4327   | 4560   | 0.3401976   | 2830273   | 0.12419371  | 3011315  | 0.29329874  | empty        |           |          |                                           |
| 3244 G24 | P | 184575 | 185840 | 210.989458  | 68092  | 68640  | 49.43755993 | 2899132   | 0.23820097  | 2878500  | 0.10787086  | empty        |           |          |                                           |
| 3244 H01 | E | 2460   | 2480   | -0.48574384 | 3645   | 3680   | -0.18492477 | 2938545   | 0.30340556  | 3117411  | 0.44181463  | empty        |           |          |                                           |
| 3244 H02 | E | 2332   | 2360   | -0.63437974 | 3720   | 3760   | -0.12717671 | 2734871   | -0.0337598  | 2850740  | 0.06852177  | empty        |           |          |                                           |
| 3244 H03 | X | 2488   | 2520   | -0.45322974 | 3480   | 3520   | -0.3119705  | 2669554   | -0.14190271 | 2849907  | 0.06735571  | experimental | SYNthesis | SYN-1016 | AZD6244 (1.11 mM)                         |
| 3244 H04 | X | 2771   | 2800   | -0.12460507 | 3681   | 3720   | -0.1572057  | 3060873   | 0.50598948  | 2756986  | -0.06271747 | experimental | SYNthesis | SYN-1093 | VX-702 (10 mM)                            |
| 3244 H05 | X | 2208   | 2240   | -0.77837076 | 3477   | 3520   | -0.31428043 | 2975967   | 0.3654138   | 2780743  | -0.02946182 | experimental | SYNthesis | SYN-1031 | CI-1040 (1.11 mM)                         |
| 3244 H06 | X | 2487   | 2520   | -0.45439096 | 4195   | 4240   | 0.23856101  | 2965902   | 0.34874956  | 2957063  | 0.21735541  | experimental | SYNthesis | SYN-1041 | GDC-0941 (10 mM)                          |
| 3244 H07 | X | 2848   | 2880   | -0.03519129 | 3598   | 3640   | -0.22111355 | 2987662   | 0.38477677  | 3056880  | 0.35708179  | experimental | SYNthesis | SYN-1059 | PD0325901 (1.11 mM)                       |
| 3244 H08 | X | 3051   | 3080   | 0.20053595  | 3480   | 3520   | -0.3119705  | 3193834   | 0.72612802  | 3611480  | 1.1334225   | experimental | SYNthesis | SYN-1093 | VX-702 (3.33 mM)                          |
| 3244 H09 | X | 2490   | 2520   | -0.45090731 | 3528   | 3600   | -0.25114255 | 3122156   | 0.60745344  | 3380672  | 0.81033408  | experimental | SYNthesis | SYN-1047 | JN33877605 (1.11 mM)                      |
| 3244 H10 | X | 2411   | 2440   | -0.54264352 | 3363   | 3400   | -0.40205748 | 3343420   | 0.97379195  | 3532801  | 1.02338813  | experimental | SYNthesis | SYN-1041 | GDC-0941 (3.33 mM)                        |
| 3244 H11 | X | 2771   | 2800   | -0.12460507 | 3520   | 3560   | -0.28117154 | 3697479   | 1.55999415  | 3399758  | 0.83705115  | experimental | SYNthesis | SYN-1060 | PF04217903 (1.11 mM)                      |
| 3244 H12 | X | 2768   | 2800   | -0.12808872 | 3321   | 3360   | -0.43439639 | 3244789   | 0.8104423   | 3200808  | 0.58855587  | experimental | SYNthesis | SYN-1093 | VX-702 (1.11 mM)                          |
| 3244 H13 | X | 2768   | 3000   | 0.10763851  | 3880   | 3920   | -0.00398084 | 3194019   | 0.72643432  | 3359913  | 0.7812751   | experimental | SYNthesis | SYN-1050 | KU0063794 (1.11 mM)                       |
| 3244 H14 | X | 2327   | 2360   | -0.64018583 | 3797   | 3840   | -0.0678887  | 3307840   | 0.91488348  | 3530284  | 1.01976477  | experimental | SYNthesis | SYN-1041 | GDC-0941 (1.11 mM)                        |
| 3244 H15 | X | 2855   | 2880   | -0.02706276 | 3641   | 3680   | -0.18800467 | 2558086   | -0.32645609 | 2668272  | -0.18690159 | experimental | SYNthesis | SY       |                                           |

|          |   |        |        |             |        |        |             |         |             |         |             |              |           |          |                                  |
|----------|---|--------|--------|-------------|--------|--------|-------------|---------|-------------|---------|-------------|--------------|-----------|----------|----------------------------------|
| 3244 I13 | X | 2805   | 2840   | -0.08512366 | 3915   | 3960   | 0.02296825  | 3284580 | 0.87637277  | 3917887 | 1.56234132  | experimental | SYNthesis | SYN-1073 | SB202190 (10 mM)                 |
| 3244 I14 | X | 3288   | 3320   | 0.4757446   | 4274   | 4320   | 0.29938897  | 3423836 | 1.1069337   | 3580673 | 1.09030057  | experimental | SYNthesis | SYN-1073 | SB202190 (3.33 mM)               |
| 3244 I15 | X | 2765   | 2800   | -0.13157238 | 3834   | 3880   | -0.03939965 | 3222344 | 0.77333096  | 3224968 | 0.59237565  | experimental | SYNthesis | SYN-1074 | SB203580 (10 mM)                 |
| 3244 I16 | X | 2807   | 2840   | -0.08280122 | 3355   | 3400   | -0.40817177 | 3671835 | 1.51753634  | 3991962 | 1.66603339  | experimental | SYNthesis | SYN-1074 | SB203580 (3.33 mM)               |
| 3244 I17 | X | 3005   | 3040   | 0.14711992  | 3674   | 3720   | -0.16256562 | 3207856 | 3.10449041  | 3104262 | 0.42427463  | experimental | SYNthesis | SYN-1076 | SB242235 (10 mM)                 |
| 3244 I18 | X | 3085   | 3120   | 0.24001736  | 3877   | 3920   | -0.00629077 | 3652544 | 1.48559696  | 3943345 | 1.59797807  | experimental | SYNthesis | SYN-1076 | SB242235 (3.33 mM)               |
| 3244 I19 | X | 2685   | 2720   | -0.22446981 | 3752   | 3800   | -0.10253753 | 3362369 | 1.0051651   | 3387721 | 0.82020145  | experimental | SYNthesis | SYN-1078 | SD-06 (10 mM)                    |
| 3244 I20 | X | 2686   | 2720   | -0.22330859 | 3912   | 3960   | 0.02065833  | 3514487 | 1.25702116  | 3506660 | 0.98669529  | experimental | SYNthesis | SYN-1078 | SD-06 (3.33 mM)                  |
| 3244 I21 | X | 4043   | 4080   | 1.35246413  | 4507   | 4560   | 0.47879295  | 2787721 | 0.05374196  | 3013496 | 0.29635176  | experimental | SYNthesis | SYN-1079 | SD169 (10 mM)                    |
| 3244 I22 | X | 3757   | 3800   | 1.0203558   | 4992   | 5040   | 0.85223041  | 3113516 | 0.59314852  | 3350079 | 0.76750922  | experimental | SYNthesis | SYN-1079 | SD169 (3.33 mM)                  |
| 3244 I23 | N | 4314   | 4960   | 1.66715418  | 4510   | 4880   | 0.48110287  | 2758495 | 0.00535357  | 3086381 | 0.39637804  | empty        |           |          |                                  |
| 3244 I24 | P | 208214 | 209440 | 238.493989  | 111950 | 112520 | 83.2071255  | 2899744 | 0.23921424  | 2342164 | 0.2494968   | empty        |           |          |                                  |
| 3244 J01 | E | 2696   | 2720   | -0.21169641 | 4762   | 4800   | 0.67513636  | 3060625 | 0.50557887  | 2842600 | 0.05637128  | empty        |           |          |                                  |
| 3244 J02 | E | 2687   | 2720   | -0.22214738 | 3910   | 3960   | 0.01911838  | 3028691 | 0.45270695  | 3108655 | 0.42955775  | empty        |           |          |                                  |
| 3244 J03 | X | 3199   | 3240   | 0.3723962   | 4303   | 4360   | 0.32171822  | 3464110 | 1.17361385  | 3233626 | 0.60449534  | experimental | SYNthesis | SYN-1084 | SU-5402 (1.11 mM)                |
| 3244 J04 | X | 4485   | 4520   | 1.86572245  | 7750   | 7800   | 2.97581912  | 1377249 | -2.28152362 | 1417888 | -1.93722096 | experimental | SYNthesis | SYN-1053 | Masatinib (10 mM)                |
| 3244 J05 | X | 2633   | 2680   | -0.28485314 | 4138   | 4200   | 0.19467249  | 2841874 | 0.14340105  | 3307175 | 0.70745111  | experimental | SYNthesis | SYN-1007 | AMG-47a (1.11 mM)                |
| 3244 J06 | X | 3200   | 3240   | 0.37355742  | 5062   | 5120   | 0.9061286   | 2594310 | -0.26648138 | 3068455 | 0.37328471  | experimental | SYNthesis | SYN-1087 | TAK-715 (10 mM)                  |
| 3244 J07 | X | 2356   | 2400   | -0.60651051 | 4184   | 4240   | 0.2300913   | 3183666 | 0.70929324  | 3342164 | 0.7564296   | experimental | SYNthesis | SYN-1024 | BMS-5 (1.11 mM)                  |
| 3244 J08 | X | 4241   | 4280   | 1.58238528  | 5310   | 5360   | 1.09708219  | 2958102 | 0.33583539  | 2922759 | 0.1693358   | experimental | SYNthesis | SYN-1053 | Masatinib (3.33 mM)              |
| 3244 J09 | X | 3002   | 3040   | 0.14363627  | 4305   | 4360   | 0.32325817  | 4011032 | 2.07913209  | 3694342 | 1.24941733  | experimental | SYNthesis | SYN-1101 | R1487 (1.11 mM)                  |
| 3244 J10 | X | 3327   | 3360   | 0.51203211  | 4516   | 4560   | 0.48572272  | 3721952 | 1.60051318  | 3486154 | 0.95799047  | experimental | SYNthesis | SYN-1087 | TAK-715 (3.33 mM)                |
| 3244 J11 | X | 2641   | 2680   | -0.2755634  | 3574   | 3640   | -0.22804332 | 3150767 | 0.6548236   | 2984981 | 0.25643574  | experimental | SYNthesis | SYN-1072 | RWJ-67657 (1.11 mM)              |
| 3244 J12 | X | 4485   | 4520   | 1.86572245  | 5469   | 5520   | 1.21950808  | 3168794 | 0.68467023  | 3276422 | 0.66440227  | experimental | SYNthesis | SYN-1053 | Masatinib (1.11 mM)              |
| 3244 J13 | X | 2319   | 2360   | -0.64947597 | 3865   | 3920   | -0.01553046 | 3369178 | 0.10164385  | 3855973 | 1.47567252  | experimental | SYNthesis | SYN-1073 | SB202190 (1.11 mM)               |
| 3244 J14 | X | 3040   | 3080   | 0.19472996  | 4230   | 4280   | 0.19472996  | 3312508 | 0.92261211  | 3236132 | 0.71261678  | experimental | SYNthesis | SYN-1087 | TAK-715 (1.11 mM)                |
| 3244 J15 | X | 2965   | 3000   | 0.09711855  | 4586   | 4640   | 0.53962091  | 3307335 | 1.58498241  | 3535071 | 1.02645483  | experimental | SYNthesis | SYN-1074 | SB203580 (1.11 mM)               |
| 3244 J16 | E | 3085   | 3120   | 0.24001736  | 3870   | 3920   | -0.01168058 | 3266911 | 0.84711887  | 3601742 | 1.11979349  | empty        |           |          |                                  |
| 3244 J17 | X | 3004   | 3040   | 0.14595871  | 4432   | 4480   | 0.42104489  | 3446125 | 1.14383676  | 3085014 | 0.39646448  | experimental | SYNthesis | SYN-1076 | SB242235 (1.11 mM)               |
| 3244 J18 | E | 3288   | 3320   | 0.4757446   | 4230   | 4280   | 0.26551011  | 3125988 | 0.61379794  | 3173173 | 0.51987169  | empty        |           |          |                                  |
| 3244 J19 | X | 2363   | 2400   | -0.59838198 | 4030   | 4080   | 0.11151528  | 3054066 | 0.49471938  | 3478885 | 0.94781514  | experimental | SYNthesis | SYN-1078 | SD-06 (1.11 mM)                  |
| 3244 J20 | E | 2645   | 2680   | -0.27091853 | 4183   | 4240   | 0.22932132  | 3349673 | 0.9841448   | 3454052 | 0.91305327  | empty        |           |          |                                  |
| 3244 J21 | X | 2962   | 3000   | 0.09718755  | 5550   | 5600   | 1.28187599  | 3391189 | 1.05288129  | 3302775 | 0.70129187  | experimental | SYNthesis | SYN-1079 | SD169 (1.11 mM)                  |
| 3244 J22 | X | 2962   | 3000   | 0.09493275  | 4108   | 4200   | 0.04493275  | 2790023 | 0.41785421  | 2917225 | 0.05061606  | empty        |           |          |                                  |
| 3244 J23 | N | 3967   | 4440   | 1.26421157  | 5228   | 5520   | 1.03394431  | 2916805 | 0.2674615   | 3212015 | 0.57424371  | empty        |           |          |                                  |
| 3244 J24 | P | 148113 | 149440 | 168.64913   | 85952  | 86560  | 63.1893376  | 2680397 | -0.12395036 | 2670230 | -0.18416073 | empty        |           |          |                                  |
| 3244 K01 | E | 2537   | 2560   | -0.39633006 | 5040   | 5080   | 0.88918917  | 2925256 | 0.2814535   | 2844121 | 0.05925632  | empty        |           |          |                                  |
| 3244 K02 | E | 2568   | 2600   | -0.36033231 | 4269   | 4320   | 0.2955391   | 2849039 | 0.15526387  | 3140557 | 0.47421499  | empty        |           |          |                                  |
| 3244 K03 | X | 2884   | 2920   | 0.00661256  | 3903   | 3960   | 0.01372856  | 1488068 | -2.09804476 | 1471713 | -1.86187535 | experimental | SYNthesis | SYN-1090 | Vandetanib (10 mM)               |
| 3244 K04 | X | 3279   | 3320   | 0.46529363  | 4503   | 4560   | 0.47571305  | 2748109 | -0.45887101 | 2072499 | -1.02087981 | experimental | SYNthesis | SYN-1090 | Vandetanib (3.33 mM)             |
| 3244 K05 | X | 4560   | 4600   | 0.13005297  | 4450   | 4500   | 0.1265617   | 2277440 | -1.2265525  | 2120525 | -0.48292619 | experimental | SYNthesis | SYN-1033 | CP-724714 (10 mM)                |
| 3244 K06 | X | 4876   | 4920   | 0.13975866  | 6303   | 6360   | 1.86166652  | 3082505 | 0.54180477  | 2397123 | -0.56646286 | experimental | SYNthesis | SYN-1033 | CP-724714 (3.33 mM)              |
| 3244 K07 | X | 4273   | 4320   | 1.61954425  | 4702   | 4760   | 0.62893791  | 2815628 | 0.09994653  | 2115042 | -0.96132703 | experimental | SYNthesis | SYN-1064 | PF562271 (10 mM)                 |
| 3244 K08 | X | 5398   | 5440   | 0.292591441 | 4745   | 4800   | 0.6620468   | 2680446 | -0.12386923 | 2146226 | -0.91767487 | experimental | SYNthesis | SYN-1064 | PF562271 (3.33 mM)               |
| 3244 K09 | X | 2640   | 2680   | -0.27672462 | 4348   | 4400   | 0.3563706   | 2764972 | 0.01607729  | 1786872 | -1.42070776 | experimental | SYNthesis | SYN-1003 | AC220 (10 mM)                    |
| 3244 K10 | X | 2725   | 2760   | -0.17802109 | 3831   | 3880   | -0.04170958 | 3332227 | 0.95526012  | 1746490 | -1.47723551 | experimental | SYNthesis | SYN-1003 | AC220 (3.33 mM)                  |
| 3244 K11 | X | 2884   | 2920   | 0.00661256  | 3667   | 3720   | -0.16798534 | 2716136 | -0.06477864 | 1838257 | -1.34877772 | experimental | SYNthesis | SYN-1049 | K20227 (10 mM)                   |
| 3244 K12 | X | 3557   | 3600   | 0.78811222  | 6545   | 6600   | 2.04800027  | 3277440 | 0.8642202   | 3277440 | 5.60801210  | experimental | SYNthesis | SYN-1049 | K20227 (3.33 mM)                 |
| 3244 K13 | X | 3680   | 3720   | 0.89029929  | 5183   | 5240   | 0.99929547  | 3253384 | 0.8240702   | 2547402 | 1.02645483  | experimental | SYNthesis | SYN-1075 | SB-216763 (10 mM)                |
| 3244 K14 | X | 2958   | 3000   | 0.09254268  | 4421   | 4480   | 0.41257517  | 3453400 | 1.15588171  | 4306534 | 2.10637929  | experimental | SYNthesis | SYN-1075 | SB-216763 (3.33 mM)              |
| 3244 K15 | X | 4044   | 4080   | 1.35362535  | 6346   | 6400   | 1.89477541  | 2177141 | -0.95717244 | 2474669 | -0.457912   | experimental | SYNthesis | SYN-1015 | AZ-960 (10 mM)                   |
| 3244 K16 | X | 3201   | 3240   | 0.37471864  | 4863   | 4920   | 0.75290375  | 2988555 | 0.4028119   | 2733690 | -0.0953278  | experimental | SYNthesis | SYN-1015 | AZ-960 (3.33 mM)                 |
| 3244 K17 | X | 3085   | 3120   | 0.24001736  | 4628   | 4680   | 0.57195982  | 3180333 | 0.70377492  | 3242131 | 0.61640086  | experimental | SYNthesis | SYN-1032 | CP690550 (Tasocitinib) (10 mM)   |
| 3244 K18 | X | 2601   | 2640   | -0.32201212 | 4788   | 4840   | 0.69515568  | 3551072 | 1.31759357  | 3615905 | 1.13835938  | experimental | SYNthesis | SYN-1032 | CP690550 (Tasocitinib) (3.33 mM) |
| 3244 K19 | X | 4165   | 4200   | 1.49413271  | 4864   | 4920   | 0.75367372  | 3100216 | 0.57112821  | 2741825 | -0.08394022 | experimental | SYNthesis | SYN-1035 | CT111387 (10 mM)                 |
| 3244 K20 | X | 3920   | 3960   | 1.20963432  | 6108   | 6160   | 1.71152156  | 3799469 | 1.72885517  | 4013925 | 1.69677776  | experimental | SYNthesis | SYN-1035 | CT111387 (3.33 mM)               |
| 3244 K21 | X | 3320   | 3360   | 0.51290357  | 4339   | 4400   | 0.34943729  | 2982871 | 0.37684449  | 2824345 | 0.03157337  | experimental | SYNthesis | SYN-1054 | Merck-5 (10 mM)                  |
| 3244 K22 | X | 3555   | 3600   | 0.78578978  | 4587   | 4640   | 0.54039088  | 3095390 | 0.56313798  | 2795467 | -0.00885079 | experimental | SYNthesis | SYN-1054 | Merck-5 (3.33 mM)                |
| 3244 K23 | N | 5176   | 5920   | 2.66812403  | 4888   | 5200   | 0.7721531   | 3013696 | 0.42788029  | 2919453 | 0.16470797  | empty        |           |          |                                  |
| 3244 K24 | P | 243604 | 244440 | 279.534991  | 91163  | 91840  | 67.2016729  | 3695949 | 1.55746099  | 3086446 | 0.39846903  | empty        |           |          |                                  |
| 3244 L01 | E | 2616   | 2640   | -0.30459385 | 4637   | 4680   | 0.57888959  | 2973056 | 0.36059417  | 3303191 | 0.70247333  | empty        |           |          |                                  |
| 3244 L02 | E | 2807   | 2840   | -0.08280122 | 4462   | 4520   | 0.44414411  | 2892144 | 0.2266312   | 3109324 | 0.43049424  | empty        |           |          |                                  |
| 3244 L03 | X | 3281   | 3320   | 0.46761607  | 6431   | 6480   | 1.96023221  | 2438287 | -0.5248028  | 3191694 | 0.54579786  | experimental | SYNthesis | SYN-1090 | Vandetanib (1.11 mM)             |
| 3244 L04 | X | 1996   | 2040   | -1.02454896 | 3298   | 3360   | -0.4521058  | 1195516 | -2.58241213 | 1234237 | -2.1943003  | experimental | SYNthesis | SYN-1100 | TOVOK (10 mM)                    |
| 3244 L05 | X | 4600   | 4640   | 1.99926251  | 5382   | 5440   | 1.15252033  | 2707417 | -0.07921436 | 2468767 | -0.46617377 | experimental | SYNthesis | SYN-1033 | CP-724714 (1.11 mM)              |
| 3244 L06 | X | 3191   | 3240   | 0.36310646  | 5011   | 5080   | 0.86685992  | 2316400 | -0.72660654 | 2439494 | -0.50715086 | experimental | SYNthesis | SYN-1028 | CC-401 (10 mM)                   |
| 3244 L07 | X | 3593   | 3640   | 0.82991606  | 5541   | 4600   | 0.50497207  | 3792728 | 1.71769435  | 3535187 | 1.02662811  | experimental | SYNthesis | SYN-1064 | PF562271 (1.11 mM)               |
| 3244 L08 | X | 3272   | 3320   | 0.45716511  | 4417   | 4480   | 0.40949528  | 2006941 | -1.23896619 | 1687599 | -1.55967263 | experimental | SYNthesis | SYN-1100 | TOVOK (3.33 mM)                  |
| 3244 L09 | X | 2644   | 2680   | -0.27207975 | 4906   | 4960   | 0.78601263  | 3493333 | 1.22199728  | 3089403 | 0.40260831  | experimental | SYNthesis | SYN-1003 | AC220 (1.11 mM)                  |
| 3244 L10 | X | 3003   | 3040   | 0.124756    |        |        |             |         |             |         |             |              |           |          |                                  |

|          |   |        |        |             |        |        |             |           |              |         |              |              |           |          |                                |
|----------|---|--------|--------|-------------|--------|--------|-------------|-----------|--------------|---------|--------------|--------------|-----------|----------|--------------------------------|
| 3244 M07 | X | 5396   | 5440   | 2.92359198  | 6049   | 6120   | 1.66609309  | 2769621   | 0.02377447   | 2604333 | -0.27640503  | experimental | SYNthesis | SYN-1070 | Purvalanol B (10 mM)           |
| 3244 M08 | X | 4754   | 4800   | 2.17809007  | 7379   | 7440   | 2.69015871  | 3683898   | 1.5375086    | 3063468 | 0.36630384   | experimental | SYNthesis | SYN-1070 | Purvalanol B (3.33 mM)         |
| 3244 M09 | X | 3358   | 3400   | 0.55702985  | 5216   | 5280   | 1.02470462  | 2056977   | -1.15612347  | 2092079 | -0.99347122  | experimental | SYNthesis | SYN-1080 | SNS-032 (10 mM)                |
| 3244 M10 | X | 3801   | 3840   | 1.07144939  | 4980   | 5040   | 0.84298072  | 2837031   | 0.13538268   | 2655034 | -0.33141677  | experimental | SYNthesis | SYN-1080 | SNS-032 (3.33 mM)              |
| 3244 M11 | X | 3919   | 3960   | 0.0847311   | 6142   | 6200   | 1.37770068  | 2034870   | -1.11927255  | 2262817 | -0.75446782  | experimental | SYNthesis | SYN-1070 | AZD7762 (10 mM)                |
| 3244 M12 | X | 3159   | 3200   | 0.32594748  | 5178   | 5240   | 0.99544556  | 2455315   | -0.49661018  | 2754660 | -0.06597346  | experimental | SYNthesis | SYN-1017 | AZD7762 (3.33 mM)              |
| 3244 M13 | X | 2803   | 2840   | -0.0874461  | 5582   | 5640   | 1.30651516  | 2502117   | -0.41912187  | 2890635 | 0.1243678    | experimental | SYNthesis | SYN-1109 | CX-4945 (10 mM)                |
| 3244 M14 | X | 3646   | 3680   | 0.89146061  | 5267   | 5320   | 1.06397333  | 3473326   | 1.18887244   | 2922676 | 0.16921961   | experimental | SYNthesis | SYN-1109 | CX-4945 (3.33 mM)              |
| 3244 M15 | X | 1962   | 2000   | -1.06403037 | 3585   | 3640   | -0.23112322 | 1400253   | -2.24343676  | 1419352 | -1.93517161  | experimental | SYNthesis | SYN-1012 | AV-412 (10 mM)                 |
| 3244 M16 | X | 3406   | 3440   | 0.61276831  | 4228   | 4280   | 0.26397016  | 2137406   | -1.02269019  | 1932768 | -1.21647882  | experimental | SYNthesis | SYN-1012 | AV-412 (3.33 mM)               |
| 3244 M17 | X | 3762   | 3800   | 1.02616189  | 4911   | 4960   | 0.78986625  | 1823705   | -1.54234317  | 1630766 | -1.63922891  | experimental | SYNthesis | SYN-1030 | CI-1033 (Canertinib) (10 mM)   |
| 3244 M18 | X | 3362   | 3400   | 0.56167472  | 4508   | 4560   | 0.47055292  | 2182947   | -0.94755966  | 1803799 | -1.39785228  | experimental | SYNthesis | SYN-1030 | CI-1033 (Canertinib) (3.33 mM) |
| 3244 M19 | X | 3282   | 3320   | 0.46877729  | 4187   | 4240   | 0.23240122  | 2701993   | -0.08819467  | 2732619 | -0.09682702  | experimental | SYNthesis | SYN-1039 | Erlotinib (10 mM)              |
| 3244 M20 | X | 3284   | 3320   | 0.47109972  | 5030   | 5080   | 0.88148943  | 3152366   | 0.65747101   | 3234117 | 0.60518266   | experimental | SYNthesis | SYN-1039 | Erlotinib (3.33 mM)            |
| 3244 M21 | X | 2484   | 2520   | -0.45787461 | 4147   | 4200   | 0.20160225  | 1563126   | -1.97377404  | 1493220 | -1.8317693   | experimental | SYNthesis | SYN-1042 | Gefitinib (10 mM)              |
| 3244 M22 | X | 2876   | 2920   | -0.00267719 | 4385   | 4440   | 0.3848561   | 2077256   | -1.12254829  | 2433518 | -0.51551621  | experimental | SYNthesis | SYN-1042 | Gefitinib (3.33 mM)            |
| 3244 M23 | N | 5284   | 5284   | 2.79353557  | 5242   | 5560   | 1.04472395  | 2860439   | 0.17413842   | 2699947 | -0.14256211  | empty        |           |          |                                |
| 3244 M24 | P | 288685 | 289680 | 331.883856  | 93231  | 93960  | 68.7939794  | 3080971   | 0.53926498   | 2988091 | 0.26218902   | empty        |           |          |                                |
| 3244 N01 | E | 3174   | 3200   | 0.34336575  | 4436   | 4480   | 0.42412478  | 2649237   | -0.1755408   | 2689712 | -0.15688933  | empty        |           |          |                                |
| 3244 N02 | E | 2964   | 3000   | 0.09590999  | 4864   | 4920   | 0.75367372  | 2957682   | 0.33514001   | 2755361 | -0.06499219  | empty        |           |          |                                |
| 3244 N03 | X | 3517   | 3560   | 0.7416635   | 5261   | 5320   | 1.05935346  | 2482228   | -0.45205134  | 3147470 | 0.48389198   | experimental | SYNthesis | SYN-1040 | Flavopipridol (1.11 mM)        |
| 3244 N04 | X | 3398   | 3440   | 0.60347857  | 5775   | 5840   | 1.45512017  | 1970181   | -1.29982835  | 2028287 | -1.00703833  | experimental | SYNthesis | SYN-1010 | AT-7519 (10 mM)                |
| 3244 N05 | X | 4482   | 4520   | 1.86223888  | 6813   | 6880   | 2.25435334  | 2764737   | 0.01568821   | 3087816 | 0.40038679   | experimental | SYNthesis | SYN-1097 | PHA690509 (1.11 mM)            |
| 3244 N06 | X | 2398   | 2440   | -0.55773935 | 3640   | 3720   | -0.18877464 | 1736977   | -1.68593546  | 1679095 | -1.57157674  | experimental | SYNthesis | SYN-1052 | Lapatinib (10 mM)              |
| 3244 N07 | X | 2957   | 3000   | 0.09138148  | 5141   | 5200   | 0.96695656  | 2858618   | 0.17112346   | 2910518 | 0.15220053   | experimental | SYNthesis | SYN-1070 | Purvalanol B (1.11 mM)         |
| 3244 N08 | X | 3679   | 3720   | 0.5297808   | 4798   | 4860   | 0.92974226  | 2495515   | -0.43005255  | 2679    | 0.43411266   | experimental | SYNthesis | SYN-1043 | GSK690693 (3.33 mM)            |
| 3244 N09 | X | 3159   | 3200   | 0.32478627  | 4701   | 4760   | 0.62818793  | 256953783 | -0.30750207  | 3723493 | -0.10960182  | experimental | SYNthesis | SYN-1080 | SNS-032 (10 mM)                |
| 3244 N10 | X | 3158   | 3200   | 0.32594748  | 4662   | 4720   | 0.59813894  | 2179343   | -0.95352667  | 2154214 | -0.90649307  | experimental | SYNthesis | SYN-1052 | Lapatinib (3.33 mM)            |
| 3244 N11 | X | 3475   | 3520   | 0.69289235  | 5374   | 5440   | 1.14636054  | 2886273   | 0.21691081   | 3018848 | 0.30384363   | experimental | SYNthesis | SYN-1017 | AZD7762 (1.11 mM)              |
| 3244 N12 | X | 3520   | 3560   | 0.74514715  | 4816   | 4880   | 0.71671496  | 2244505   | -0.84564039  | 2373990 | -0.59884503  | experimental | SYNthesis | SYN-1010 | AT-7519 (1.11 mM)              |
| 3244 N13 | X | 2841   | 2880   | -0.04331982 | 4900   | 4960   | 0.78139279  | 2707986   | -0.07827229  | 2145325 | -0.91893612  | experimental | SYNthesis | SYN-1109 | Lapatinib (1.11 mM)            |
| 3244 N14 | X | 3284   | 3320   | 0.47109972  | 4623   | 4680   | 0.56810995  | 2634801   | -0.19944195  | 2790802 | -0.01538097  | experimental | SYNthesis | SYN-1052 | Lapatinib (1.11 mM)            |
| 3244 N15 | X | 2805   | 2840   | -0.08512366 | 4626   | 4680   | 0.57041987  | 2682017   | -0.12126819  | 2686977 | -0.16071785  | experimental | SYNthesis | SYN-1012 | AV-412 (1.11 mM)               |
| 3244 N16 | X | 3040   | 3080   | 0.14247505  | 4798   | 4860   | 0.59659899  | 2876089   | 0.14560199   | 2616272 | 0.48389198   | experimental | SYNthesis | SYN-1039 | Erlotinib (1.11 mM)            |
| 3244 N17 | X | 3084   | 3120   | 0.23885614  | 4186   | 4240   | 0.23163125  | 2536449   | -0.36227966  | 2265609 | -0.75055951  | experimental | SYNthesis | SYN-1030 | CI-1033 (Canertinib) (1.11 mM) |
| 3244 N18 | X | 3364   | 3400   | 0.56399716  | 4829   | 4880   | 0.72672462  | 3294664   | 0.89306847   | 3104896 | 0.42429581   | empty        |           |          |                                |
| 3244 N19 | X | 3162   | 3200   | 0.32943114  | 4187   | 4240   | 0.23240122  | 3100724   | 0.57196928   | 3278691 | 0.66757848   | experimental | SYNthesis | SYN-1039 | Erlotinib (1.11 mM)            |
| 3244 N20 | E | 2924   | 2960   | 0.05306127  | 4588   | 4640   | 0.54116085  | 2685383   | -0.11569523  | 2802158 | 0.00051545   | empty        |           |          |                                |
| 3244 N21 | X | 2888   | 2920   | 0.01125743  | 4350   | 4400   | 0.35790701  | 2504875   | -0.41455555  | 2637433 | -0.2300708   | experimental | SYNthesis | SYN-1042 | Gefitinib (1.11 mM)            |
| 3244 N22 | E | 3039   | 3080   | 0.18660133  | 4546   | 4600   | 0.50882194  | 2659321   | -0.15888451  | 2932163 | 0.18249976   | empty        |           |          |                                |
| 3244 N23 | N | 2890   | 2920   | 2.33601571  | 6172   | 5520   | 0.92057426  | 2923084   | -0.2828807   | 2686370 | -0.22696807  | empty        |           |          |                                |
| 3244 N24 | P | 202774 | 20280  | 332.122463  | 103604 | 104240 | 76.7809213  | 2450962   | -0.50381728  | 2638704 | -0.22829316  | empty        |           |          |                                |
| 3244 O01 | E | 3173   | 3200   | 0.34220454  | 4719   | 4760   | 0.64202747  | 2682704   | -0.12013075  | 2594124 | -0.29069585  | empty        |           |          |                                |
| 3244 O02 | E | 2726   | 2760   | -0.17685988 | 4825   | 4880   | 0.72364473  | 2800221   | 0.07443774   | 2986124 | 0.25803574   | empty        |           |          |                                |
| 3244 O03 | X | 2926   | 2960   | 0.05538371  | 4222   | 4280   | 0.25935032  | 1956879   | -1.321851975 | 1645763 | -1.61823573  | experimental | SYNthesis | SYN-1006 | Akt-1-1,2 (10 mM)              |
| 3244 O04 | X | 2519   | 2560   | -0.41723199 | 3938   | 5015   | 0.86993982  | 2584620   | -0.28252475  | 2140381 | -0.92585685  | experimental | SYNthesis | SYN-1006 | Akt-1-1,2 (3.33 mM)            |
| 3244 O05 | X | 3400   | 3440   | 0.37355742  | 6448   | 6520   | 1.97331272  | 2206731   | -0.90818139  | 2298635 | -0.70442966  | experimental | SYNthesis | SYN-1043 | GSK690693 (10 mM)              |
| 3244 O06 | X | 3200   | 3240   | 0.60928466  | 7938   | 8000   | 1.20574226  | 2689619   | -0.10068188  | 2465122 | -0.47629475  | experimental | SYNthesis | SYN-1043 | GSK690693 (3.33 mM)            |
| 3244 O07 | X | 3204   | 3240   | 0.37820229  | 6332   | 6400   | 1.11402168  | 2682967   | -0.11969531  | 2803091 | 0.05895938   | experimental | SYNthesis | SYN-1051 | KU55933 (10 mM)                |
| 3244 O08 | X | 2999   | 3040   | 0.14015262  | 5140   | 5200   | 0.96618659  | 2977683   | 0.36825492   | 3296307 | 0.6922378    | experimental | SYNthesis | SYN-1051 | KU55933 (3.33 mM)              |
| 3244 O09 | X | 4002   | 4040   | 1.30485419  | 5223   | 5280   | 1.03009444  | 2459528   | -0.48963488  | 2164637 | -0.89190269  | experimental | SYNthesis | SYN-1011 | AT9283 (10 mM)                 |
| 3244 O10 | X | 3395   | 3440   | 0.59999491  | 4895   | 4960   | 0.77754292  | 2448857   | -0.50730245  | 2098253 | -0.9848287   | experimental | SYNthesis | SYN-1011 | AT9283 (3.33 mM)               |
| 3244 O11 | X | 4798   | 4840   | 2.22918366  | 7092   | 7160   | 2.46917613  | 2829920   | 0.12360926   | 3009531 | 0.29080145   | experimental | SYNthesis | SYN-1034 | CYC-116 (10 mM)                |
| 3244 O12 | X | 4154   | 4200   | 1.48135932  | 6536   | 6600   | 2.0410705   | 3160941   | 0.67166831   | 2863493 | 0.08637374   | experimental | SYNthesis | SYN-1034 | CYC-116 (3.33 mM)              |
| 3244 O13 | X | 3600   | 3640   | 0.83804459  | 5379   | 5440   | 1.15021041  | 2998332   | 0.40244269   | 2846705 | 0.06287347   | experimental | SYNthesis | SYN-1095 | Danusertib (10 mM)             |
| 3244 O14 | X | 3079   | 3120   | 0.23305005  | 4660   | 4720   | 0.59659899  | 2878083   | 0.20335093   | 3169674 | 0.5149737    | experimental | SYNthesis | SYN-1095 | Danusertib (3.33 mM)           |
| 3244 O15 | X | 3721   | 3760   | 0.97851596  | 5384   | 5440   | 1.15406028  | 2426200   | -0.54481148  | 2782322 | -0.02725149  | experimental | SYNthesis | SYN-1048 | JNJ706621 (10 mM)              |
| 3244 O16 | X | 3964   | 4000   | 1.26072791  | 5066   | 5120   | 0.9092085   | 2915252   | 0.26489025   | 2714672 | -0.12194968  | experimental | SYNthesis | SYN-1048 | JNJ706621 (3.33 mM)            |
| 3244 O17 | X | 2163   | 2200   | -0.83062557 | 3786   | 3840   | -0.07635841 | 1603408   | -1.90780864  | 1601339 | -1.68014161  | experimental | SYNthesis | SYN-1081 | SNS-314 (10 mM)                |
| 3244 O18 | X | 2562   | 2600   | -0.36729962 | 4548   | 4600   | 0.51036189  | 1767860   | -1.63480364  | 1763851 | -1.45293314  | experimental | SYNthesis | SYN-1081 | SNS-314 (3.33 mM)              |
| 3244 O19 | X | 3405   | 3440   | 0.61160709  | 4588   | 4640   | 0.54116085  | 3019498   | 0.43748644   | 2718511 | -0.11657575  | experimental | SYNthesis | SYN-1092 | VX-680 (10 mM)                 |
| 3244 O20 | X | 3045   | 3080   | 0.19356864  | 4348   | 4400   | 0.35636706  | 2927971   | 0.28594862   | 2975272 | 0.24284483   | experimental | SYNthesis | SYN-1092 | VX-680 (3.33 mM)               |
| 3244 O21 | X | 2447   | 2480   | -0.50083968 | 4798   | 4860   | -0.04247955 | 1886170   | -1.43892221  | 1712312 | -1.51248031  | experimental | SYNthesis | SYN-1001 | ABT-737 (10 mM)                |
| 3244 O22 | X | 2601   | 2640   | -0.32201212 | 4265   | 4320   | 0.2924592   | 1787668   | -1.60200828  | 1845463 | -1.338869058 | experimental | SYNthesis | SYN-1001 | ABT-737 (3.33 mM)              |
| 3244 O23 | N | 3869   | 4400   | 1.15041221  | 5484   | 5880   | 1.23105769  | 2822958   | 0.11208254   | 2760472 | -0.05783768  | empty        |           |          |                                |
| 3244 O24 | P | 168325 | 169640 | 192.119667  | 119253 | 120120 | 88.8302467  | 2893459   | 0.2288084    | 2836379 | 0.04841887   | empty        |           |          |                                |
| 3244 P01 | E | 3303   | 3320   | 0.49316286  | 4932   | 4960   | 0.80603196  | 2746800   | -0.0140094   | 2664177 | -0.19263387  | empty        |           |          |                                |
| 3244 P02 | E | 2694   | 2720   | -0.21401885 | 4877   | 4920   | 0.76368338  | 2384893   | -0.61320525  | 2393092 | -0.57210556  | empty        |           |          |                                |
| 3244 P03 | X | 2931   | 2960   | 0.0611898   | 4797   | 4840   | 0.70208545  | 2353507   | -0.66516987  | 2611167 | -0.26683862  | experimental | SYNthesis | SYN-1006 | Akt-1-1,2 (1.11 mM)            |
| 3244 P04 | X | 437    |        |             |        |        |             |           |              |         |              |              |           |          |                                |

|          |   |        |        |             |        |        |             |         |              |              |     |              |                                          |
|----------|---|--------|--------|-------------|--------|--------|-------------|---------|--------------|--------------|-----|--------------|------------------------------------------|
| 3259 A01 | N | 598    | 600    | 0.65959198  | 519    | 520    | 0.01611436  | 1004605 | -0.44089765  | empty        |     |              |                                          |
| 3259 A02 | E | 76     | 80     | -1.81496609 | 117    | 120    | -2.05713366 | 80277   | -1.89973641  | empty        |     |              |                                          |
| 3259 A03 | X | 518    | 520    | 0.28034937  | 398    | 400    | -0.60792298 | 927623  | -0.562396    | experimental | NIH | SAM002264608 | DOXEPIH HYDROCHLORIDE                    |
| 3259 A04 | X | 396    | 400    | -0.29799562 | 516    | 520    | 0.00064236  | 1455973 | 0.27148274   | experimental | NIH | SAM002554930 | Novocain                                 |
| 3259 A05 | X | 435    | 440    | -0.11311485 | 432    | 440    | -0.43257365 | 1468364 | 0.29103908   | experimental | NIH | SAM002264616 | Folic acid                               |
| 3259 A06 | X | 356    | 360    | -0.48761693 | 597    | 600    | 0.41838636  | 1318949 | 0.05522193   | experimental | NIH | SAM002554928 | Pronestyl                                |
| 3259 A07 | X | 475    | 480    | 0.07650646  | 434    | 440    | -0.42225898 | 1348308 | 0.10155834   | experimental | NIH | SAM002264625 | NORFLOXACIN                              |
| 3259 A08 | X | 836    | 840    | 1.78783877  | 636    | 640    | 0.61952236  | 1559376 | 0.43468055   | experimental | NIH | SAM002554936 | Tolbutamide                              |
| 3259 A09 | X | 475    | 480    | 0.07650646  | 516    | 520    | 0.00064236  | 1048344 | -0.37186571  | experimental | NIH | SAM002264636 | Phenergan                                |
| 3259 A10 | X | 756    | 760    | 1.40859615  | 516    | 520    | 0.00064236  | 1387014 | 0.16264685   | experimental | NIH | SAM002564250 | CLOBETASOL PROPIONATE                    |
| 3259 A11 | X | 551    | 560    | 0.43678695  | 394    | 400    | -0.62855232 | 1342066 | 0.09170679   | experimental | NIH | SAM002264645 | Ranitidine hydrochloride                 |
| 3259 A12 | X | 477    | 480    | 0.08598753  | 636    | 640    | 0.61952236  | 1065554 | -0.34312542  | experimental | NIH | SAM002564205 | DIGOXIN                                  |
| 3259 A13 | X | 275    | 280    | -0.87160008 | 675    | 680    | 0.82065836  | 1226155 | -0.09123202  | experimental | NIH | SAM002264653 | URSODEOXYCHOLIC ACID                     |
| 3259 A14 | X | 514    | 520    | 0.26138724  | 594    | 600    | 0.40291436  | 1372894 | 0.14036168   | experimental | NIH | SAM002564213 | HYDROCORTISONE HEMISUCCINATE             |
| 3259 A15 | X | 996    | 1000   | 2.546324    | 915    | 920    | 2.05841837  | 1484213 | 0.31605307   | experimental | NIH | SAM003107539 | 3,5,3'-TRIIODOTHYRONINE                  |
| 3259 A16 | X | 474    | 480    | 0.07176593  | 754    | 760    | 1.2280877   | 1583444 | 0.47266634   | experimental | NIH | SAM002564222 | 19-NORETHINDRONE ACETATE                 |
| 3259 A17 | X | 756    | 760    | 1.40859615  | 754    | 760    | 1.2280877   | 1393606 | 0.17305008   | experimental | NIH | SAM002554899 | Chlorpropamide                           |
| 3259 A18 | X | 515    | 520    | 0.26612777  | 753    | 760    | 1.22293037  | 1655780 | 0.58683205   | experimental | NIH | SAM002564229 | Pfizerpen                                |
| 3259 A19 | X | 675    | 680    | 1.024613    | 874    | 880    | 1.84696771  | 1164901 | -0.181790735 | experimental | NIH | SAM002554902 | Vistaril Pamoate                         |
| 3259 A20 | X | 710    | 720    | 1.19053165  | 794    | 800    | 1.43438104  | 1255252 | -0.04530911  | experimental | NIH | SAM002564237 | TRIAMCINOLONE ACETONIDE                  |
| 3259 A21 | X | 2275   | 2280   | 8.60946533  | 754    | 760    | 1.2280877   | 1061750 | -0.35070743  | experimental | NIH | SAM002554911 | Maxolon                                  |
| 3259 A22 | X | 749    | 760    | 1.37541242  | 634    | 640    | 0.60920769  | 1269568 | -0.0227146   | experimental | NIH | SAM002564258 | 6ALPHA-METHYL-11BETA-HYDROXYPROGESTERONE |
| 3259 A23 | E | 420    | 920    | -0.18422284 | 441    | 840    | -0.38615765 | 82226   | -1.89666037  | empty        |     |              |                                          |
| 3259 A24 | P | 170843 | 171200 | 807.711582  | 136117 | 136560 | 699.340206  | 855953  | -0.67551058  | empty        |     |              |                                          |
| 3259 B01 | N | 557    | 560    | 0.46523014  | 356    | 360    | -0.82453098 | 1169610 | -0.18047527  | empty        |     |              |                                          |
| 3259 B02 | E | 115    | 120    | -1.62060425 | 158    | 160    | -1.84566299 | 85748   | -1.8911017   | empty        |     |              |                                          |
| 3259 B03 | X | 646    | 640    | -1.62153478 | 196    | 200    | -0.64970433 | 528957  | -1.18159842  | experimental | NIH | SAM002589929 | Primaquine Diphosphate                   |
| 3259 B04 | X | 355    | 360    | -0.49235746 | 472    | 480    | -0.22628031 | 1153193 | -0.20638573  | experimental | NIH | SAM002699889 | Inderal                                  |
| 3259 B05 | X | 875    | 880    | 1.97271954  | 1555   | 1560   | 5.35911174  | 1400581 | 0.18405923   | experimental | NIH | SAM002589939 | Albendazole                              |
| 3259 B06 | X | 434    | 440    | -0.11785538 | 310    | 320    | -1.06176832 | 1314654 | 0.04844326   | experimental | NIH | SAM002589988 | Ethambutol                               |
| 3259 B07 | X | 515    | 520    | 0.26612777  | 795    | 800    | 1.43953837  | 1431960 | 0.23358375   | experimental | NIH | SAM002589947 | Floxuridine                              |
| 3259 B08 | X | 394    | 400    | -0.30747669 | 514    | 520    | -0.00967231 | 1550415 | 0.42053767   | experimental | NIH | SAM002589956 | clidogrel                                |
| 3259 B09 | X | 116    | 120    | -1.62534478 | 114    | 120    | -2.07260566 | 525375  | -1.19725178  | experimental | NIH | SAM002699904 | Clomid                                   |
| 3259 B10 | X | 281    | 280    | -0.89056221 | 515    | 520    | -0.00967231 | 1192133 | 1.24987198   | experimental | NIH | SAM002554902 | Triamteram                               |
| 3259 B11 | X | 1796   | 1800   | 6.33875016  | 1075   | 1080   | 2.88359172  | 1530181 | 0.38860297   | experimental | NIH | SAM002548959 | Mebendazole                              |
| 3259 B12 | X | 230    | 240    | -1.08492405 | 232    | 240    | -1.46404032 | 1084849 | -0.31425098  | experimental | NIH | SAM002589969 | Simvastatin                              |
| 3259 B13 | X | 556    | 560    | 0.46048961  | 554    | 560    | 0.19662102  | 1821500 | 0.84838288   | experimental | NIH | SAM002548936 | Ganciclovir                              |
| 3259 B14 | X | 635    | 640    | 0.83499169  | 594    | 600    | 0.40291436  | 1496399 | 0.33528587   | experimental | NIH | SAM002703129 | CARBIDOPA                                |
| 3259 B15 | X | 233    | 240    | -1.07070245 | 193    | 200    | -1.66517633 | 686813  | -0.94245909  | experimental | NIH | SAM002548935 | Paroxetine                               |
| 3259 B16 | E | 315    | 320    | -0.68197877 | 434    | 440    | -0.42225898 | 1663570 | 0.59912677   | empty        |     |              |                                          |
| 3259 B17 | X | 315    | 320    | -0.68197877 | 553    | 560    | 0.19146369  | 1645867 | 0.57118656   | experimental | NIH | SAM002548982 | Eszopiclone                              |
| 3259 B18 | X | 314    | 320    | 0.6887193   | 633    | 640    | 0.60405036  | 6524972 | 0.53820872   | empty        |     |              |                                          |
| 3259 B19 | X | 595    | 600    | 0.64537039  | 433    | 440    | -0.42741631 | 1559450 | 0.43479734   | experimental | NIH | SAM002699891 | (+/-)-Epinephrine hydrochloride          |
| 3259 B20 | E | 394    | 400    | -0.30747669 | 553    | 560    | 0.19146369  | 1382975 | 0.15627222   | empty        |     |              |                                          |
| 3259 B21 | X | 389    | 400    | -0.33117935 | 472    | 480    | -0.22628031 | 1400988 | 0.18470159   | experimental | NIH | SAM002264603 | Carbamazepine                            |
| 3259 B22 | E | 513    | 520    | 0.2566467   | 632    | 640    | 0.59889303  | 1303397 | 0.03067668   | empty        |     |              |                                          |
| 3259 B23 | E | 320    | 680    | -0.65827611 | 233    | 680    | -1.45888299 | 88590   | -1.88661626  | empty        |     |              |                                          |
| 3259 B24 | P | 121407 | 122240 | 573.358607  | 151510 | 152240 | 573.727039  | 1133216 | -1.23791482  | empty        |     |              |                                          |
| 3259 C01 | N | 317    | 320    | -0.67249771 | 557    | 560    | 0.209302    | 1221324 | -0.09885664  | empty        |     |              |                                          |
| 3259 C02 | E | 117    | 120    | -1.62060425 | 116    | 120    | -2.062291   | 86023   | -1.89066768  | empty        |     |              |                                          |
| 3259 C03 | X | 437    | 440    | -0.10363378 | 436    | 440    | -0.41194431 | 6377014 | 8.03821207   | experimental | NIH | SAM002264609 | DIPYRIDAMOLE                             |
| 3259 C04 | X | 395    | 400    | -0.30273615 | 554    | 560    | 0.19662102  | 1443657 | 0.25204477   | experimental | NIH | SAM002554921 | Pyrimethamine                            |
| 3259 C05 | X | 554    | 560    | 0.45100855  | 551    | 560    | 0.18114902  | 1370305 | 0.13627554   | experimental | NIH | SAM002264617 | HYDROCORTISONE                           |
| 3259 C06 | X | 435    | 440    | -0.11311485 | 595    | 600    | 0.40807169  | 1515682 | 0.36571964   | experimental | NIH | SAM002554929 | Sulfisoxazole                            |
| 3259 C07 | X | 354    | 360    | -0.497098   | 433    | 440    | -0.42741631 | 1130573 | -0.24208618  | experimental | NIH | SAM002264627 | NADLOL                                   |
| 3259 C08 | X | 476    | 480    | 0.08124699  | 635    | 640    | 0.61436503  | 9544643 | 13.0375846   | experimental | NIH | SAM002554937 | Triamterene                              |
| 3259 C09 | X | 276    | 280    | -0.86685955 | 395    | 400    | -0.62339498 | 525421  | -1.19717918  | experimental | NIH | SAM002264637 | PERPHENAZINE                             |
| 3259 C10 | X | 316    | 320    | -0.67723824 | 354    | 360    | -0.83484565 | 767882  | -0.81451036  | experimental | NIH | SAM002564196 | Sonazine                                 |
| 3259 C11 | X | 351    | 360    | -0.51131959 | 593    | 600    | 0.39775703  | 871771  | -0.65054551  | experimental | NIH | SAM002264646 | RIFAMPICIN                               |
| 3259 C12 | X | 596    | 600    | 0.65011092  | 435    | 440    | -0.41710165 | 1301185 | 0.02718555   | experimental | NIH | SAM002564206 | 17-BETA-ESTRADIOL 17-VALERATE            |
| 3259 C13 | X | 274    | 280    | -0.87634061 | 514    | 520    | -0.00967231 | 1271876 | -0.01907196  | experimental | NIH | SAM002554879 | Dapsone                                  |
| 3259 C14 | X | 396    | 400    | -0.29799562 | 594    | 600    | 0.40291436  | 1505112 | 0.34903733   | experimental | NIH | SAM002564214 | INDAPAMIDE                               |
| 3259 C15 | X | 355    | 360    | -0.49235746 | 515    | 520    | -0.00451498 | 1348239 | 0.10144984   | experimental | NIH | SAM002703134 | HYDROFLUMETHIAZIDE                       |
| 3259 C16 | X | 757    | 760    | 1.41333668  | 474    | 480    | -0.21596565 | 1694262 | 0.64756702   | experimental | NIH | SAM002564238 | 19-Norethindrone                         |
| 3259 C17 | X | 274    | 280    | -0.87634061 | 434    | 440    | -0.42225898 | 1027497 | -0.4047679   | experimental | NIH | SAM002554894 | Bentyl                                   |
| 3259 C18 | X | 556    | 560    | 0.46048961  | 554    | 560    | 0.19662102  | 1515406 | 0.36528404   | experimental | NIH | SAM002564230 | Valproic Acid                            |
| 3259 C19 | X | 153    | 160    | -1.44994507 | 272    | 280    | -1.25774699 | 687503  | -0.94137009  | experimental | NIH | SAM002554903 | Hexachlorophene                          |
| 3259 C20 | X | 515    | 520    | 0.26612777  | 794    | 800    | 1.43438104  | 1445379 | 0.25476255   | experimental | NIH | SAM002564238 | S(-)-Timolol maleate                     |
| 3259 C21 | X | 515    | 520    | 0.26612777  | 632    | 640    | 0.59889303  | 1186694 | -0.15351212  | experimental | NIH | SAM002554912 | Methyldopa                               |
| 3259 C22 | X | 511    | 520    | 0.2566467   | 833    | 840    | 1.63551704  | 1302139 | 0.02869122   | experimental | NIH | SAM002564245 | Thalidomide                              |
| 3259 C23 | E | 459    | 800    | 0.00065794  | 381    | 720    | 0.48059765  | 86133   | -1.89049407  | empty        |     |              |                                          |
| 3259 C24 | P | 115039 | 115800 | 543.170895  | 114226 | 115000 | 586.441021  | 1085990 | -0.31245018  | empty        |     |              |                                          |
| 3259 D01 | N | 318    | 320    | -0.66775717 | 477    | 480    | -0.20049365 | 1141018 | -0.22560116  | empty        |     |              |                                          |
| 3259 D02 | E | 118    | 120    | -1.61586371 | 156    | 160    | -1.85599766 | 92010   | -1.88121858  | empty        |     |              |                                          |
| 3259 D03 | X | 276    | 280    | -0.86685955 | 515    | 520    | -0.00451498 | 1389239 | 0.1661585    | experimental | NIH | SAM002589930 | Microphenin                              |
| 3259 D04 | X | 396    | 400    | -0.29799562 | 514    | 520    | -0.00967231 | 1293392 | 0.01488609   | experimental | NIH | SAM002589951 | Ribavirin                                |
| 3259 D05 | X | 355    | 360    | -0.49235746 | 474    | 480    | -0.21596565 | 1448447 | 0.25960468   | experimental | NIH | SAM002589948 | Griseofulvin                             |
| 3259 D06 | X | 480    | 480    | 0.07650646  | 315    | 320    | -1.04113893 | 1288419 | 0.0070373    | experimental | NIH | SAM002589949 | Cefazolin                                |
| 3259 D07 | X | 596    | 600    | 0.65011092  | 515    | 520    | -0.00451498 | 1028691 | -0.40288344  | experimental | NIH | SAM002699896 | MITOXANTRONE                             |
| 3259 D08 | X | 195    | 200    | -1.2508427  | 434    | 440    | -0.42225898 | 1295967 | 0.01895014   | experimental | NIH | SAM002643511 | CEFOTAXIME SODIUM SALT                   |
| 3259 D09 | X | 436    | 440    | -0.10837431 | 515    | 520    | -0.00451498 | 1432984 | 0.2351999    | experimental | NIH | SAM003107541 | PHENTOLAMINE HCL                         |
| 3259 D10 | X | 435    | 440    | -0.11311485 | 395    | 400    | -0.62339498 | 1129119 | -0.24438099  | experimental | NIH | SAM002589961 | Azithromycin                             |
| 3259 D11 | X | 474    | 480    | 0.07176593  | 434    | 440    | -0.42225898 | 1308004 | 0.03794777   | experimental | NIH | SAM002548969 | Duremesin                                |
| 3259 D12 | X | 354    | 360    | -0.497098   | 555    | 360    | -0.82968832 | 905143  | -0.5978755   | experimental | NIH | SAM002589970 | Rifabutin                                |
| 3259 D13 | X | 440    | 440    | -0.10363378 | 315    | 320    | -0.20177836 | 1562940 | 0.44030055   | experimental | NIH | SAM002554937 | Mesna                                    |
| 3259 D14 | E | 235    | 240    |             |        |        |             |         |              |              |     |              |                                          |

|          |   |        |        |             |        |        |             |         |              |              |     |              |                                 |
|----------|---|--------|--------|-------------|--------|--------|-------------|---------|--------------|--------------|-----|--------------|---------------------------------|
| 3259 D19 | X | 674    | 680    | 1.01987247  | 794    | 800    | 1.43438104  | 1123107 | -0.25386954  | experimental | NIH | SAM002264595 | 5-Azacytidine                   |
| 3259 D20 | E | 632    | 640    | 0.8207701   | 669    | 680    | 0.78971436  | 1271318 | -0.01995263  | empty        |     |              |                                 |
| 3259 D21 | X | 434    | 440    | -0.11785538 | 512    | 520    | -0.01998698 | 1365167 | 0.12816639   | experimental | NIH | SAM002699890 | Memantine hydrochloride         |
| 3259 D22 | E | 474    | 480    | 0.07176593  | 512    | 520    | -0.01998698 | 1246347 | -0.05936366  | empty        |     |              |                                 |
| 3259 D23 | E | 310    | 320    | -0.70566843 | 383    | 400    | -0.68528298 | 90459   | -1.88366647  | empty        |     |              |                                 |
| 3259 D24 | P | 139038 | 139640 | 656.93894   | 113596 | 114280 | 583.191901  | 1394479 | 0.17442863   | empty        |     |              |                                 |
| 3259 E01 | N | 398    | 400    | -0.28851456 | 437    | 440    | -0.40678698 | 1285511 | 0.00244775   | empty        |     |              |                                 |
| 3259 E02 | E | 37     | 40     | -1.99984686 | 116    | 120    | -2.062291   | 93041   | -1.87959138  | empty        |     |              |                                 |
| 3259 E03 | X | 356    | 360    | -0.48761693 | 635    | 640    | 0.61436503  | 1308057 | 0.03803142   | experimental | NIH | SAM002264610 | Propofol                        |
| 3259 E04 | X | 475    | 480    | 0.07650646  | 473    | 480    | -0.22112298 | 1420003 | 0.21471238   | experimental | NIH | SAM002554922 | Pro-Banthine                    |
| 3259 E05 | X | 396    | 400    | -0.29799562 | 635    | 640    | 0.61436503  | 1431303 | 0.23254683   | experimental | NIH | SAM002264618 | Cortell                         |
| 3259 E06 | X | 275    | 280    | -0.87160008 | 394    | 400    | -0.62855232 | 1313747 | 0.04701177   | experimental | NIH | SAM002554930 | Sulfamethoxazole                |
| 3259 E07 | X | 356    | 360    | -0.48761693 | 475    | 480    | -0.21080831 | 1303238 | 0.03042573   | experimental | NIH | SAM002264628 | Disipal                         |
| 3259 E08 | X | 236    | 240    | -1.05648085 | 434    | 440    | -0.42225898 | 1410300 | 0.19939843   | experimental | NIH | SAM002554938 | Intropin                        |
| 3259 E09 | X | 476    | 480    | 0.08124699  | 514    | 520    | -0.00967231 | 1331004 | 0.07424797   | experimental | NIH | SAM002264639 | Prednisolone                    |
| 3259 E10 | X | 394    | 400    | -0.30747669 | 354    | 360    | -0.83484565 | 1307570 | 0.03726228   | experimental | NIH | SAM002564200 | CEFAZOLIN SODIUM SALT           |
| 3259 E11 | X | 795    | 800    | 1.59347693  | 836    | 840    | 1.65098904  | 1207047 | -0.1213896   | experimental | NIH | SAM002264647 | Retinoic acid                   |
| 3259 E12 | X | 395    | 400    | -0.30273615 | 354    | 360    | -0.83484565 | 1368566 | 0.13353093   | experimental | NIH | SAM002564207 | EDROPHONIUM CHLORIDE            |
| 3259 E13 | X | 314    | 320    | -0.6867193  | 434    | 440    | -0.42225898 | 1098451 | -0.29278336  | experimental | NIH | SAM002554881 | Symmetrel                       |
| 3259 E14 | X | 315    | 320    | -0.68197877 | 475    | 480    | -0.21080831 | 1361440 | 0.12228418   | experimental | NIH | SAM002564215 | IPRATROPIUM BROMIDE MONOHYDRATE |
| 3259 E15 | X | 315    | 320    | -0.68197877 | 274    | 280    | -1.24743232 | 996117  | -0.454294    | experimental | NIH | SAM002554886 | Annolytin                       |
| 3259 E16 | X | 316    | 320    | -0.67723824 | 474    | 480    | -0.21596565 | 1523240 | 0.3776482    | experimental | NIH | SAM002564224 | NICOTINE                        |
| 3259 E17 | X | 556    | 560    | 0.46048961  | 634    | 640    | 0.60920769  | 1276657 | -0.01152625  | experimental | NIH | SAM002554895 | Chloroxine                      |
| 3259 E18 | X | 314    | 320    | -0.6867193  | 713    | 720    | 1.01663703  | 1340351 | 0.08900005   | experimental | NIH | SAM002564231 | Kemadrin                        |
| 3259 E19 | X | 592    | 600    | 0.63114879  | 710    | 720    | 1.00116503  | 1440170 | 0.24654134   | experimental | NIH | SAM002554904 | Isoniazid                       |
| 3259 E20 | X | 1194   | 1200   | 0.48494948  | 1561   | 1600   | 5.338482    | 1555665 | -0.42882359  | experimental | NIH | SAM002554913 | Sulfamethoxazole                |
| 3259 E21 | X | 492    | 400    | -0.31695775 | 1070   | 1080   | 2.85780505  | 1582880 | -0.1985707   | experimental | NIH | SAM002554919 | NITROFURANTOIN                  |
| 3259 E22 | X | 314    | 320    | 0.26138724  | 631    | 640    | 0.59373569  | 1359997 | 0.12000674   | experimental | NIH | SAM002558919 | Aminolevulinic Acid             |
| 3259 E23 | E | 450    | 720    | -0.04200686 | 524    | 880    | 0.04190102  | 99210   | -1.86985504  | empty        |     |              |                                 |
| 3259 E24 | P | 90796  | 91520  | 428.246161  | 119920 | 120680 | 615.806877  | 1108068 | -0.27760514  | empty        |     |              |                                 |
| 3259 F01 | N | 237    | 240    | -1.05174032 | 397    | 400    | -0.61308032 | 1208828 | -0.1185787   | empty        |     |              |                                 |
| 3259 F02 | E | 157    | 160    | -1.43098294 | 37     | 40     | -2.46972033 | 92296   | -1.88076719  | empty        |     |              |                                 |
| 3259 F03 | X | 436    | 440    | -0.10837431 | 476    | 480    | -0.20565098 | 1881788 | 0.9435336    | experimental | NIH | SAM002589932 | DOXYCYCLINE                     |
| 3259 F04 | X | 355    | 360    | -0.49235746 | 474    | 480    | -0.00451498 | 1319339 | 0.0581815    | experimental | NIH | SAM002589936 | Tecumidate                      |
| 3259 F05 | X | 355    | 360    | -0.49235746 | 434    | 440    | -0.42225898 | 1538381 | 0.40154478   | experimental | NIH | SAM002589936 | Lincomycin hydrochloride        |
| 3259 F06 | X | 436    | 440    | -0.10837431 | 515    | 520    | -0.00451498 | 1395018 | 0.17527932   | experimental | NIH | SAM002589990 | DICLOXACILLIN SODIUM            |
| 3259 F07 | X | 275    | 280    | -0.87160008 | 514    | 520    | -0.00967231 | 1598672 | 0.49670023   | experimental | NIH | SAM002699897 | ENALAPRIL MALEATE               |
| 3259 F08 | X | 356    | 360    | -0.48761693 | 554    | 560    | 0.19662102  | 1452927 | 0.26667533   | experimental | NIH | SAM002589994 | LAMIVUDINE                      |
| 3259 F09 | X | 436    | 440    | -0.10837431 | 675    | 680    | 0.82065836  | 1361280 | 0.12203166   | experimental | NIH | SAM002548956 | FLUDARABINE                     |
| 3259 F10 | X | 235    | 240    | -1.06122139 | 315    | 320    | -1.03598165 | 1457244 | 0.27348872   | experimental | NIH | SAM002589963 | Lovastatin                      |
| 3259 F11 | X | 275    | 280    | -0.87160008 | 274    | 280    | -1.24227499 | 807493  | -0.75189252  | experimental | NIH | SAM002548968 | Felodipin Acetate               |
| 3259 F12 | X | 234    | 240    | -1.06596192 | 274    | 280    | -1.24743232 | 1283618 | -0.00053991  | experimental | NIH | SAM002589971 | Felodipin                       |
| 3259 F13 | X | 955    | 960    | 2.35196216  | 715    | 720    | 1.0269517   | 1348866 | 0.10243902   | experimental | NIH | SAM002548942 | Mectomen                        |
| 3259 F14 | E | 714    | 720    | 1.20949378  | 393    | 400    | -0.63370965 | 1386503 | 0.16184035   | empty        |     |              |                                 |
| 3259 F15 | X | 555    | 560    | 0.45574908  | 715    | 720    | 1.0269517   | 1531125 | 0.39009285   | experimental | NIH | SAM002548930 | Etomidate                       |
| 3259 F16 | E | 355    | 360    | -0.49235746 | 475    | 480    | -0.21080831 | 1277513 | -0.01017525  | empty        |     |              |                                 |
| 3259 F17 | X | 195    | 200    | -1.2508427  | 234    | 240    | -1.45372566 | 564031  | -1.13624219  | experimental | NIH | SAM002548975 | Evista                          |
| 3259 F18 | E | 276    | 280    | -0.86685955 | 474    | 480    | -0.21596565 | 1424147 | 0.22125227   | empty        |     |              |                                 |
| 3259 F19 | X | 395    | 400    | -0.30273615 | 473    | 480    | -0.21122998 | 407581  | 0.19510712   | experimental | NIH | SAM002264597 | Buspar                          |
| 3259 F20 | E | 394    | 400    | -0.30747669 | 591    | 600    | 0.38744236  | 1331350 | 0.07479405   | empty        |     |              |                                 |
| 3259 F21 | X | 435    | 440    | -0.11311485 | 713    | 720    | 1.01663703  | 921438  | -0.57215759  | experimental | NIH | SAM002264605 | Norpramin                       |
| 3259 F22 | E | 474    | 480    | 0.07176593  | 512    | 520    | -0.01998698 | 1255577 | -0.04479617  | empty        |     |              |                                 |
| 3259 F23 | E | 317    | 640    | -0.67249771 | 407    | 840    | -0.56150698 | 92825   | -1.87993229  | empty        |     |              |                                 |
| 3259 F24 | P | 109155 | 109680 | 515.277601  | 146524 | 147280 | 753.012574  | 1364234 | 0.12669387   | empty        |     |              |                                 |
| 3259 G01 | N | 358    | 360    | -0.47813586 | 517    | 520    | 0.00579969  | 1253711 | -0.064774122 | empty        |     |              |                                 |
| 3259 G02 | E | 157    | 160    | -1.43098294 | 117    | 120    | -2.05713366 | 90388   | -1.88377853  | empty        |     |              |                                 |
| 3259 G03 | X | 316    | 320    | -0.67723824 | 275    | 280    | -1.24227499 | 1126968 | -0.24777585  | experimental | NIH | SAM002264611 | ETHACRYNIC ACID                 |
| 3259 G04 | X | 396    | 400    | -0.29799562 | 434    | 440    | -0.42225898 | 1394916 | 0.17511833   | experimental | NIH | SAM002554923 | Probencid                       |
| 3259 G05 | X | 315    | 320    | -0.68197877 | 475    | 480    | -0.21080831 | 1200648 | -0.13148894  | experimental | NIH | SAM002264619 | IBUPROFEN                       |
| 3259 G06 | X | 355    | 360    | -0.49235746 | 472    | 480    | -0.22628031 | 1453390 | 0.26740607   | experimental | NIH | SAM002554931 | Sulfacetamide                   |
| 3259 G07 | X | 516    | 520    | 0.2708683   | 674    | 680    | 0.81550103  | 1500643 | 0.34198404   | experimental | NIH | SAM002264629 | OFLOXACIN                       |
| 3259 G08 | X | 315    | 320    | -0.68197877 | 514    | 520    | -0.00967231 | 1019475 | -0.41742878  | experimental | NIH | SAM002564189 | AMOXAPINE                       |
| 3259 G09 | X | 435    | 440    | -0.11311485 | 435    | 440    | -0.41710165 | 1197772 | -0.13602805  | experimental | NIH | SAM002264640 | PRILCICLAINE HYDROCHLORIDE      |
| 3259 G10 | X | 436    | 440    | -0.10837431 | 235    | 240    | -1.44856832 | 1413657 | 0.20469668   | experimental | NIH | SAM002564201 | CAPTROPIL                       |
| 3259 G11 | X | 355    | 360    | -0.49235746 | 356    | 360    | -0.82453098 | 1118216 | -0.26158886  | experimental | NIH | SAM002264648 | Spirolactone                    |
| 3259 G12 | X | 515    | 520    | 0.26612777  | 556    | 560    | 0.20693569  | 1333708 | 0.07851561   | experimental | NIH | SAM002564208 | FLUCICINOLONE ACETONIDE         |
| 3259 G13 | X | 353    | 360    | -0.50183853 | 434    | 440    | -0.42225898 | 1127524 | -0.24689833  | experimental | NIH | SAM002554882 | WARFARIN SODIUM                 |
| 3259 G14 | X | 315    | 320    | -0.68197877 | 394    | 400    | -0.62855232 | 1017925 | -0.4198751   | experimental | NIH | SAM002564216 | Tofranil                        |
| 3259 G15 | X | 434    | 440    | -0.11785538 | 634    | 640    | 0.60920769  | 1325780 | 0.06600309   | experimental | NIH | SAM002554887 | Busulfan                        |
| 3259 G16 | X | 594    | 600    | 0.6062985   | 434    | 440    | -0.42225898 | 717919  | -0.89136544  | experimental | NIH | SAM002564254 | Gardene                         |
| 3259 G17 | X | 555    | 560    | 0.45574908  | 635    | 640    | 0.61436503  | 1244302 | -0.05959403  | experimental | NIH | SAM002554896 | Diffusal                        |
| 3259 G18 | X | 475    | 480    | 0.07650646  | 634    | 640    | 0.60920769  | 1392553 | 0.17138888   | experimental | NIH | SAM002564232 | Proxymetacaine                  |
| 3259 G19 | X | 355    | 360    | -0.49235746 | 554    | 560    | 0.19662102  | 1348928 | 0.10253687   | experimental | NIH | SAM002554905 | Duvaldin                        |
| 3259 G20 | X | 115    | 120    | -1.63008531 | 274    | 280    | -1.24743232 | 505231  | -1.22904444  | experimental | NIH | SAM002564240 | THIORIDAZINE HYDROCHLORIDE      |
| 3259 G21 | X | 596    | 600    | 0.65011092  | 354    | 360    | -0.83484565 | 773916  | -0.80498708  | experimental | NIH | SAM002554915 | Pamelor                         |
| 3259 G22 | X | 393    | 400    | -0.31221722 | 634    | 640    | 0.60920769  | 1219957 | -0.10101413  | experimental | NIH | SAM002589920 | Carbinoxamine Maleate           |
| 3259 G23 | E | 417    | 680    | -0.19844444 | 429    | 840    | -0.44804565 | 90194   | -1.88408471  | empty        |     |              |                                 |
| 3259 G24 | P | 88529  | 89120  | 417.499373  | 138769 | 139310 | 713.017454  | 1082275 | 0.31811345   | empty        |     |              |                                 |
| 3259 H01 | N | 397    | 400    | -0.29325509 | 357    | 360    | -0.81937365 | 1121964 | -0.25567351  | empty        |     |              |                                 |
| 3259 H02 | E | 196    | 200    | -1.24610216 | 157    | 160    | -1.85084033 | 87955   | -1.88761846  | empty        |     |              |                                 |
| 3259 H03 | X | 517    | 520    | 0.27560884  | 516    | 520    | 0.00064236  | 1460249 | 0.27823142   | experimental | NIH | SAM002699895 | Beclomethasone dipropionate     |
| 3259 H04 | X | 355    | 360    | -0.49235746 | 714    | 720    | 1.02179437  | 1250327 | -0.05308209  | experimental | NIH | SAM002589983 | Chlorthalidone                  |
| 3259 H05 | X | 556    | 560    | 0.46048961  | 392    | 400    | -0.63886698 | 1402741 | 0.18746829   | experimental | NIH | SAM002589943 | Methazolamide                   |
| 3259 H06 | X | 395    | 400    | -0.30273615 | 955    | 960    | 2.26471771  | 1152760 | -0.20706912  | experimental | NIH | SAM002589991 | Meloxicam                       |
| 3259 H07 | X | 475    | 480    | 0.07650646  | 473    | 480    | -0.22628031 | 1440665 | 0.24731259   | experimental | NIH | SAM002699898 | EDISONIDE                       |
| 3259 H08 | X | 395    | 400    | -0.30273615 | 514    | 520    | -0.00967231 | 1292869 | 0.01406066   | experimental | NIH | SAM002589958 | Ondansetron                     |



|          |   |        |        |             |        |        |             |         |              |              |     |              |                                            |
|----------|---|--------|--------|-------------|--------|--------|-------------|---------|--------------|--------------|-----|--------------|--------------------------------------------|
| 3259 H13 | X | 514    | 520    | 0.26138724  | 395    | 400    | -0.62339498 | 1549336 | 0.41883472   | experimental | NIH | SAM002589905 | Fluconazole                                |
| 3259 H14 | E | 275    | 280    | -0.87160008 | 435    | 440    | -0.41710165 | 1219537 | -0.10167701  | empty        |     |              |                                            |
| 3259 H15 | X | 595    | 600    | 0.64537039  | 475    | 480    | -0.21080831 | 1527566 | 0.38447579   | experimental | NIH | SAM002548933 | Moban                                      |
| 3259 H16 | E | 640    | 640    | 0.81602956  | 351    | 360    | -0.85031765 | 1432731 | 0.23480066   | empty        |     |              |                                            |
| 3259 H17 | X | 555    | 560    | 0.45574908  | 475    | 480    | -0.21080831 | 1545160 | 0.4065621    | experimental | NIH | SAM002548971 | zidovudine                                 |
| 3259 H18 | E | 432    | 440    | -0.12733644 | 354    | 360    | -0.83484565 | 1277363 | -0.01041199  | empty        |     |              |                                            |
| 3259 H19 | X | 595    | 600    | 0.64537039  | 554    | 560    | 0.19662102  | 1340711 | 0.08956823   | experimental | NIH | SAM002264596 | Flumadine                                  |
| 3259 H20 | E | 515    | 520    | 0.26612777  | 395    | 400    | -0.62339498 | 1247706 | -0.05721873  | empty        |     |              |                                            |
| 3259 H21 | X | 513    | 520    | 0.2566467   | 515    | 520    | -0.00451498 | 1244970 | -0.06153688  | experimental | NIH | SAM002264606 | Mexitil                                    |
| 3259 H22 | E | 514    | 520    | 0.26138724  | 512    | 520    | -0.01998698 | 1172584 | -0.1757815   | empty        |     |              |                                            |
| 3259 H23 | E | 243    | 520    | -1.02329713 | 472    | 800    | -0.22628031 | 88928   | -1.8860828   | empty        |     |              |                                            |
| 3259 H24 | P | 93363  | 93920  | 440.415108  | 110399 | 111120 | 566.703906  | 1271812 | -0.01917297  | empty        |     |              |                                            |
| 3259 I01 | N | 357    | 360    | -0.4828764  | 357    | 360    | -0.81937365 | 1233910 | -0.07899254  | empty        |     |              |                                            |
| 3259 I02 | E | 157    | 160    | -1.43098294 | 157    | 160    | -1.85084033 | 83979   | -1.89389366  | empty        |     |              |                                            |
| 3259 I03 | X | 276    | 280    | -0.86685955 | 315    | 320    | -1.03598165 | 1177636 | -0.16780808  | experimental | NIH | SAM002264612 | FLUTAMIDE                                  |
| 3259 I04 | X | 396    | 400    | -0.29799562 | 554    | 560    | 0.19662102  | 1488445 | 0.32273231   | experimental | NIH | SAM002554924 | PYRIDINE-2-ALDOXIME METHOCHLORIDE          |
| 3259 I05 | X | 395    | 400    | -0.30273615 | 435    | 440    | -0.41710165 | 1245188 | -0.06119282  | experimental | NIH | SAM002264620 | KETOPROFEN                                 |
| 3259 I06 | X | 395    | 400    | -0.30273615 | 393    | 400    | -0.63370965 | 1402079 | 0.18642348   | experimental | NIH | SAM002554932 | Sulfipyrazone                              |
| 3259 I07 | X | 475    | 480    | 0.07650646  | 474    | 480    | -0.21598565 | 1397722 | 0.17954696   | experimental | NIH | SAM002264631 | PINDOLOL                                   |
| 3259 I08 | X | 515    | 520    | 0.26612777  | 754    | 760    | 1.2280877   | 1481604 | 0.31193537   | experimental | NIH | SAM002564191 | Adenine 9-beta;-D-arabinofuranoside        |
| 3259 I09 | X | 434    | 440    | -0.11785538 | 473    | 480    | -0.22112298 | 1326882 | 0.06774234   | experimental | NIH | SAM002264641 | Prednisone                                 |
| 3259 I10 | X | 436    | 440    | -0.10837431 | 515    | 520    | -0.00451498 | 1401053 | 0.18480417   | experimental | NIH | SAM002564202 | CHLORAMBUCIL                               |
| 3259 I11 | X | 395    | 400    | -0.30273615 | 354    | 360    | -0.83484565 | 1221291 | -0.09890872  | experimental | NIH | SAM002264649 | Trimethoprim                               |
| 3259 I12 | X | 394    | 400    | -0.30747669 | 396    | 440    | -0.41194431 | 1336045 | 0.08220402   | experimental | NIH | SAM002564209 | Flurbiprofen                               |
| 3259 I13 | X | 555    | 560    | 0.45574908  | 436    | 400    | -0.61823765 | 1106938 | -0.27938858  | experimental | NIH | SAM002554883 | Acetazolamide                              |
| 3259 I14 | X | 315    | 320    | -0.69197877 | 365    | 360    | -0.82968832 | 1169948 | -0.17994182  | experimental | NIH | SAM002564217 | LABELALOL HYDROCHLORIDE                    |
| 3259 I15 | X | 313    | 320    | -0.69145984 | 432    | 440    | -0.43257365 | 1537328 | -0.20554135  | experimental | NIH | SAM002554888 | Chlorzaxatone                              |
| 3259 I16 | X | 1195   | 1200   | 3.48969001  | 1635   | 1640   | 5.77169841  | 1416437 | 0.20908427   | experimental | NIH | SAM002564225 | NABUMETONE                                 |
| 3259 I17 | X | 230    | 240    | -1.08492405 | 311    | 320    | -1.05661099 | 572945  | -1.121217349 | experimental | NIH | SAM002554898 | Econazole Nitrate                          |
| 3259 I18 | X | 1235   | 1240   | 3.67931132  | 515    | 520    | -0.00451498 | 1470373 | 0.29420982   | experimental | NIH | SAM002703137 | NALOXONE HYDROCHLORIDE                     |
| 3259 I19 | X | 472    | 480    | 0.06228486  | 632    | 640    | 0.59889303  | 1149401 | -0.21237052  | experimental | NIH | SAM002554906 | Isuprel                                    |
| 3259 I20 | X | 474    | 480    | 0.07176593  | 514    | 520    | -0.00967231 | 1408599 | 0.1967138    | experimental | NIH | SAM002564241 | Alitretamine                               |
| 3259 I21 | X | 634    | 640    | 0.83025116  | 433    | 440    | -0.42741631 | 1266927 | -0.02688281  | experimental | NIH | SAM002554916 | Albalon                                    |
| 3259 I22 | E | 640    | 640    | 0.82551063  | 634    | 640    | 0.60920769  | 1662272 | 0.59707818   | experimental | NIH | SAM002589921 | Demeclocycline                             |
| 3259 I23 | E | 297    | 600    | -0.76730836 | 359    | 680    | -0.80905898 | 84397   | -1.89323394  | empty        |     |              |                                            |
| 3259 I24 | P | 102222 | 102800 | 482.411488  | 107963 | 108600 | 554.140642  | 1028144 | -0.40374676  | empty        |     |              |                                            |
| 3259 J01 | N | 477    | 480    | 0.08598753  | 397    | 400    | -0.61308032 | 995596  | -0.45511628  | empty        |     |              |                                            |
| 3259 J02 | E | 157    | 160    | -1.43098294 | 197    | 200    | -1.64454699 | 88026   | -1.8875064   | empty        |     |              |                                            |
| 3259 J03 | X | 397    | 400    | -0.29325509 | 355    | 360    | -0.82968832 | 1369208 | 0.13454418   | experimental | NIH | SAM002589934 | Cromolyn Sodium                            |
| 3259 J04 | X | 435    | 440    | -0.11311485 | 555    | 560    | 0.20177836  | 1264356 | -0.03094054  | experimental | NIH | SAM002589984 | METHYLPREDNISOLONE                         |
| 3259 J05 | X | 276    | 280    | -0.86685955 | 435    | 440    | -0.41710165 | 1470395 | 0.29424544   | experimental | NIH | SAM002589944 | TABETALOL Sulfate                          |
| 3259 J06 | X | 315    | 320    | -0.68197877 | 394    | 400    | -0.62855232 | 509510  | -1.22229103  | experimental | NIH | SAM002589992 | DAUNORUBICIN HYDROCHLORIDE                 |
| 3259 J07 | X | 355    | 360    | -0.49235746 | 475    | 480    | -0.21080831 | 1379897 | 0.1514143    | experimental | NIH | SAM002699899 | RAMIPRIL                                   |
| 3259 J08 | X | 434    | 440    | -0.11785538 | 432    | 440    | -0.43257365 | 1395403 | 0.17588695   | experimental | NIH | SAM002589959 | Betamethasone                              |
| 3259 J09 | X | 796    | 800    | 1.59821746  | 835    | 840    | 1.6458317   | 1378130 | 0.1486255    | experimental | NIH | SAM002548955 | Isotretinoin                               |
| 3259 J10 | X | 194    | 200    | -1.25558323 | 313    | 320    | -1.04629632 | 620411  | -1.04725935  | experimental | NIH | SAM002589965 | Prozac                                     |
| 3259 J11 | X | 316    | 320    | -0.67723824 | 716    | 720    | 1.03210903  | 1379063 | 0.15009803   | experimental | NIH | SAM002548945 | Miochol                                    |
| 3259 J12 | X | 320    | 320    | -0.67723824 | 324    | 320    | -1.04113899 | 931767  | -0.55585565  | experimental | NIH | SAM002589973 | Acetretin                                  |
| 3259 J13 | X | 355    | 360    | -0.49235746 | 314    | 320    | -1.03598165 | 1453518 | 0.26760809   | experimental | NIH | SAM002548965 | Metaproterenol                             |
| 3259 J14 | E | 396    | 400    | -0.29799562 | 476    | 480    | -0.20565098 | 1320587 | 0.05780713   | empty        |     |              |                                            |
| 3259 J15 | X | 315    | 320    | -0.68197877 | 314    | 320    | -1.04113899 | 1349980 | 0.10419721   | experimental | NIH | SAM002548940 | fluvastatin                                |
| 3259 J16 | E | 434    | 440    | -0.11785538 | 512    | 520    | -0.01998698 | 1264598 | -0.0305586   | empty        |     |              |                                            |
| 3259 J17 | X | 356    | 360    | -0.48761693 | 435    | 440    | -0.41710165 | 1117143 | -0.26328234  | experimental | NIH | SAM002548976 | Clozapine                                  |
| 3259 J18 | E | 392    | 400    | -0.31695775 | 432    | 440    | -0.43257365 | 1278384 | -0.00880058  | empty        |     |              |                                            |
| 3259 J19 | X | 595    | 600    | 0.64537039  | 1114   | 1120   | 3.08472772  | 1176338 | -0.16985668  | experimental | NIH | SAM002548978 | Podoflox                                   |
| 3259 J20 | E | 354    | 360    | -0.497098   | 632    | 640    | 0.59889303  | 1251082 | -0.05189049  | empty        |     |              |                                            |
| 3259 J21 | X | 474    | 480    | 0.07176593  | 594    | 600    | 0.40291436  | 1262173 | -0.03438591  | experimental | NIH | SAM002264607 | Norpace                                    |
| 3259 J22 | E | 633    | 640    | 0.82551063  | 552    | 560    | 0.18630636  | 1213717 | -0.11086254  | empty        |     |              |                                            |
| 3259 J23 | E | 370    | 680    | -0.42124947 | 521    | 840    | 0.02642902  | 89263   | -1.88555408  | empty        |     |              |                                            |
| 3259 J24 | P | 104625 | 105200 | 493.802988  | 107505 | 108120 | 551.778583  | 1306080 | 0.03491118   | empty        |     |              |                                            |
| 3259 K01 | N | 357    | 360    | -0.4828764  | 398    | 400    | -0.60792298 | 1286179 | 0.00350203   | empty        |     |              |                                            |
| 3259 K02 | E | 157    | 160    | -1.43098294 | 156    | 160    | -1.85599766 | 88291   | -1.88708816  | empty        |     |              |                                            |
| 3259 K03 | X | 276    | 280    | -0.86685955 | 556    | 560    | 0.20693569  | 1282338 | -0.0025601   | experimental | NIH | SAM002264613 | FENOFIBRATE                                |
| 3259 K04 | X | 475    | 480    | 0.07650646  | 353    | 360    | -0.84000298 | 1387841 | 0.16395208   | experimental | NIH | SAM002554925 | Primidone                                  |
| 3259 K05 | X | 435    | 440    | -0.11311485 | 434    | 440    | -0.42225898 | 1161006 | -0.19405471  | experimental | NIH | SAM002264621 | MINOCYCLINE HYDROCHLORIDE                  |
| 3259 K06 | X | 356    | 360    | -0.48761693 | 675    | 680    | 0.82065836  | 1245128 | -0.06128751  | experimental | NIH | SAM002554933 | Sulindac                                   |
| 3259 K07 | X | 395    | 400    | -0.30273615 | 514    | 520    | -0.00967231 | 1194645 | -0.14096329  | experimental | NIH | SAM002264632 | PRAZQUANTEL                                |
| 3259 K08 | X | 315    | 320    | -0.68197877 | 554    | 560    | 0.19662102  | 1463812 | 0.28385479   | experimental | NIH | SAM002564193 | ATENOLOL                                   |
| 3259 K09 | X | 314    | 320    | -0.6867193  | 353    | 360    | -0.84000298 | 1222535 | -0.09694536  | experimental | NIH | SAM002264642 | DL-PENICILLAMINE                           |
| 3259 K10 | X | 396    | 400    | -0.29799562 | 409    | 400    | -0.61823765 | 1291474 | 0.01185897   | experimental | NIH | SAM002564251 | CFCIXOTIN SODIUM SALT                      |
| 3259 K11 | X | 395    | 400    | -0.30273615 | 314    | 320    | -1.04113899 | 1207292 | -0.12100292  | experimental | NIH | SAM002264650 | Tyzine                                     |
| 3259 K12 | X | 436    | 440    | -0.10837431 | 555    | 560    | 0.20177836  | 1322524 | 0.06086424   | experimental | NIH | SAM002564210 | GLIPIZIDE                                  |
| 3259 K13 | X | 275    | 280    | -0.87160008 | 395    | 400    | -0.62339498 | 1160923 | -0.1941857   | experimental | NIH | SAM002554884 | Allopurinol                                |
| 3259 K14 | X | 395    | 400    | -0.30273615 | 355    | 360    | -0.82968832 | 934063  | -0.55223194  | experimental | NIH | SAM002564218 | Imodium                                    |
| 3259 K15 | X | 516    | 520    | 0.27086683  | 596    | 600    | 0.41322903  | 1226879 | -0.09008935  | experimental | NIH | SAM002554891 | Chlorothiazide                             |
| 3259 K16 | X | 354    | 360    | -0.497098   | 274    | 280    | -1.24743232 | 941069  | -0.54117458  | experimental | NIH | SAM002564226 | OXYBUTYMIN CHLORIDE                        |
| 3259 K17 | X | 395    | 400    | -0.30273615 | 474    | 480    | -0.21596565 | 1189677 | -0.14880414  | experimental | NIH | SAM002554899 | Ethionamide                                |
| 3259 K18 | X | 157    | 160    | -1.43098294 | 635    | 640    | 0.61436505  | 1384495 | -1.89393309  | experimental | NIH | SAM002564233 | SPECTINOMYCIN DIHYDROCHLORIDE PENTAHYDRATE |
| 3259 K19 | X | 314    | 320    | -0.6867193  | 512    | 520    | -0.01998698 | 748440  | -0.84519507  | experimental | NIH | SAM002554907 | Triclosan                                  |
| 3259 K20 | X | 475    | 480    | 0.07650646  | 514    | 520    | -0.00967231 | 1344796 | 0.09601546   | experimental | NIH | SAM002564257 | Phylloquinone                              |
| 3259 K21 | X | 513    | 520    | 0.2566467   | 433    | 440    | -0.42741631 | 1297594 | 0.02151798   | experimental | NIH | SAM002554917 | Nicotinic Acid                             |
| 3259 K22 | X | 753    | 760    | 1.39437455  | 593    | 600    | 0.39775703  | 1270723 | -0.0208917   | experimental | NIH | SAM002589925 | Westcort                                   |
| 3259 K23 | E | 478    | 760    | 0.09072806  | 455    | 760    | -0.31395498 | 90977   | -1.88284893  | empty        |     |              |                                            |
| 3259 K24 | P | 94426  | 95040  | 445.454295  | 102175 | 102960 | 524.289996  | 1137730 | -0.23079051  | empty        |     |              |                                            |
| 3259 L01 | N | 237    | 240    | -1.05174032 | 277    | 280    | -1.21196032 | 1086790 | -0.31125069  | empty        |     |              |                                            |
| 3259 L02 | E | 157    | 160    | -1.43098294 | 277    | 280    | -1.21196032 | 83916   | -1.89393309  | empty        |     |              |                                            |
| 3259 L03 | X | 316    | 320    |             |        |        |             |         |              |              |     |              |                                            |

|          |   |        |        |             |        |        |             |          |             |              |     |              |                                           |
|----------|---|--------|--------|-------------|--------|--------|-------------|----------|-------------|--------------|-----|--------------|-------------------------------------------|
| 3259 L07 | X | 515    | 520    | 0.26612777  | 514    | 520    | -0.00967231 | 1468973  | 0.29200024  | experimental | NIH | SAM002699893 | DEPO-MEDROL                               |
| 3259 L08 | X | 715    | 720    | 1.21423431  | 594    | 600    | 0.40291436  | 1354738  | 0.11170662  | experimental | NIH | SAM002589995 | Celecoxib                                 |
| 3259 L09 | X | 395    | 400    | -0.30273615 | 475    | 480    | -0.21080831 | 1496271  | 0.33508385  | experimental | NIH | SAM002548951 | Methimazole                               |
| 3259 L10 | X | 395    | 400    | -0.30273615 | 475    | 480    | -0.21080831 | 1232057  | -0.08191707 | experimental | NIH | SAM002589966 | Famotidine                                |
| 3259 L11 | X | 396    | 400    | -0.29793652 | 514    | 520    | -0.00967231 | 16161843 | -0.19273369 | experimental | NIH | SAM002703131 | Dantrolene sodium salt                    |
| 3259 L12 | X | 275    | 280    | -0.87160008 | 515    | 520    | -0.00451498 | 1227039  | -0.08983683 | experimental | NIH | SAM002700173 | Allegra                                   |
| 3259 L13 | X | 476    | 480    | 0.08124699  | 435    | 440    | -0.41710165 | 1279880  | -0.00643949 | experimental | NIH | SAM002548974 | Methoxsalen                               |
| 3259 L14 | E | 596    | 600    | 0.65011092  | 394    | 400    | -0.62855232 | 1316828  | 0.05187442  | empty        |     |              |                                           |
| 3259 L15 | X | 354    | 360    | -0.497098   | 555    | 560    | 0.20177836  | 1324862  | 0.06455424  | experimental | NIH | SAM002548931 | Urecholine                                |
| 3259 L16 | E | 555    | 560    | 0.45574908  | 394    | 400    | -0.62855232 | 1348524  | 0.10189925  | empty        |     |              |                                           |
| 3259 L17 | X | 555    | 560    | 0.45574908  | 715    | 720    | -0.0269517  | 1367149  | 0.13129452  | experimental | NIH | SAM002264590 | Ampicillin Sodium                         |
| 3259 L18 | E | 314    | 320    | -0.6867193  | 432    | 440    | -0.43257365 | 1210969  | -0.11519962 | empty        |     |              |                                           |
| 3259 L19 | X | 636    | 640    | 0.83973223  | 554    | 560    | 0.19662102  | 1311935  | 0.04415194  | experimental | NIH | SAM002264599 | D-CYCLOSERINE                             |
| 3259 L20 | E | 353    | 360    | -0.50183853 | 633    | 640    | 0.60405036  | 1181416  | -0.16184222 | empty        |     |              |                                           |
| 3259 L21 | X | 635    | 640    | 0.83499169  | 673    | 680    | 0.8103437   | 1379455  | 0.15071671  | experimental | NIH | SAM002589948 | STAVUDINE                                 |
| 3259 L22 | E | 512    | 520    | 0.25190617  | 711    | 720    | 1.00632237  | 1219733  | -0.10136767 | empty        |     |              |                                           |
| 3259 L23 | E | 447    | 760    | -0.05622845 | 483    | 960    | -0.16954965 | 90527    | -1.88355915 | empty        |     |              |                                           |
| 3259 L24 | P | 105627 | 106280 | 498.553001  | 161652 | 162400 | 831.032714  | 1209617  | -0.11733344 | empty        |     |              |                                           |
| 3259 M01 | N | 398    | 400    | -0.28851456 | 398    | 400    | -0.60792298 | 1134898  | -0.23526017 | empty        |     |              |                                           |
| 3259 M02 | E | 157    | 160    | -1.43098294 | 157    | 160    | -1.85084033 | 91241    | -1.88243227 | empty        |     |              |                                           |
| 3259 M03 | X | 397    | 400    | -0.29325509 | 355    | 360    | -0.82968832 | 1119224  | -0.25999796 | experimental | NIH | SAM002264614 | FUROSEMIDE                                |
| 3259 M04 | X | 315    | 320    | -0.68197877 | 675    | 680    | 0.82065836  | 1404616  | 0.19042755  | experimental | NIH | SAM002554926 | Propylthiouracil                          |
| 3259 M05 | X | 195    | 200    | -1.2508427  | 154    | 160    | -1.86631233 | 455022   | -1.30828778 | experimental | NIH | SAM002264623 | MICONAZOLE NITRATE                        |
| 3259 M06 | X | 516    | 520    | 0.2708683   | 435    | 440    | -0.41710165 | 1400303  | 0.18362047  | experimental | NIH | SAM002554934 | TETRACYCLINE                              |
| 3259 M07 | X | 354    | 360    | -0.497098   | 435    | 440    | -0.41710165 | 1183322  | -0.15883404 | experimental | NIH | SAM002264634 | Benzenebutanoic Acid                      |
| 3259 M08 | X | 395    | 400    | -0.30273615 | 515    | 520    | -0.00451498 | 1391791  | 0.17176461  | experimental | NIH | SAM002703131 | Tamoxifen                                 |
| 3259 M09 | X | 396    | 400    | -0.6239498  | 395    | 400    | -0.6239498  | 1226389  | -0.0908627  | experimental | NIH | SAM002264643 | PIPERACILLIN SODIUM SALT                  |
| 3259 M10 | X | 356    | 360    | -0.48761693 | 435    | 440    | -0.41710165 | 1247969  | -0.05680365 | experimental | NIH | SAM002564203 | DANAZOL                                   |
| 3259 M11 | X | 435    | 440    | -0.11311485 | 755    | 760    | 1.23324503  | 965011   | -0.50338765 | experimental | NIH | SAM002264651 | L-THYROXINE                               |
| 3259 M12 | X | 315    | 320    | -0.68197877 | 354    | 360    | -0.83484565 | 1323612  | 0.0625814   | experimental | NIH | SAM002564211 | GEMFIBROZIL                               |
| 3259 M13 | X | 316    | 320    | -0.67723824 | 515    | 520    | -0.00451498 | 1083728  | -0.31602022 | experimental | NIH | SAM002554885 | ATROPINE                                  |
| 3259 M14 | X | 275    | 280    | -0.87160008 | 635    | 640    | 0.61436503  | 1203083  | -0.12764586 | experimental | NIH | SAM002564219 | Pro-Amatine                               |
| 3259 M15 | X | 316    | 320    | -0.67723824 | 314    | 320    | -1.04113899 | 1163432  | -0.19022582 | experimental | NIH | SAM002554892 | Cimetidine                                |
| 3259 M16 | X | 440    | 440    | 0.00311485  | 395    | 400    | -0.6239498  | 1280718  | -0.05619469 | experimental | NIH | SAM002564227 | Mestlinon                                 |
| 3259 M17 | X | 435    | 440    | -0.11311485 | 513    | 520    | -0.01482964 | 1113638  | -0.26881418 | experimental | NIH | SAM002554900 | Methocarbamol                             |
| 3259 M18 | X | 355    | 360    | -0.49235746 | 674    | 680    | 0.81550103  | 1354221  | 0.11089065  | experimental | NIH | SAM002564235 | TROPICAMIDE                               |
| 3259 M19 | X | 514    | 520    | 0.26138724  | 633    | 640    | 0.60405036  | 1331090  | 0.0743837   | experimental | NIH | SAM002554908 | Mefenamic Acid                            |
| 3259 M20 | X | 635    | 640    | 0.83499169  | 633    | 640    | 0.60405036  | 1999558  | 1.12940641  | experimental | NIH | SAM002564242 | Eryped                                    |
| 3259 M21 | X | 474    | 480    | 0.07176593  | 632    | 640    | 0.59889303  | 1168801  | -0.18175209 | experimental | NIH | SAM002554918 | Norflex                                   |
| 3259 M22 | X | 433    | 440    | -0.12259591 | 952    | 960    | 2.24923971  | 1219021  | -0.1024914  | experimental | NIH | SAM002589926 | DEPRENALIN                                |
| 3259 M23 | E | 720    | 720    | 0.57294652  | 466    | 520    | -0.57294652 | 87497    | -1.88834131 | empty        |     |              |                                           |
| 3259 M24 | P | 129196 | 129840 | 610.282617  | 153534 | 154320 | 789.165481  | 1189393  | -0.14925237 | empty        |     |              |                                           |
| 3259 N01 | N | 397    | 400    | -0.29325509 | 357    | 360    | -0.81937365 | 958655   | -0.51341913 | empty        |     |              |                                           |
| 3259 N02 | E | 197    | 200    | -1.24136163 | 157    | 160    | -1.85084033 | 83460    | -1.89471278 | empty        |     |              |                                           |
| 3259 N03 | X | 355    | 360    | -0.49235746 | 556    | 560    | 0.20693569  | 1191033  | -0.146664   | experimental | NIH | SAM002589937 | Mercaptopurine                            |
| 3259 N04 | X | 556    | 560    | 0.46048961  | 274    | 280    | -1.24743232 | 1004870  | -0.4404794  | experimental | NIH | SAM002589986 | NALTREXONE HYDROCHLORIDE                  |
| 3259 N05 | X | 316    | 320    | -0.67723824 | 556    | 560    | 0.20693569  | 1274092  | -0.01557451 | experimental | NIH | SAM002589945 | FLUOCINOLONE ACETONIDE 21-ACETATE         |
| 3259 N06 | X | 395    | 400    | -0.30273615 | 515    | 520    | -0.00451498 | 1117139  | -0.28759401 | experimental | NIH | SAM002589954 | Famotidin V                               |
| 3259 N07 | X | 595    | 600    | 0.64537039  | 315    | 320    | -1.03598165 | 1316048  | 0.05064337  | experimental | NIH | SAM002699901 | (+/-)-NOREPINEPHRINE HYDROCHLORIDE        |
| 3259 N08 | X | 354    | 360    | -0.497098   | 354    | 360    | -0.83484565 | 1180602  | -0.16312693 | experimental | NIH | SAM002589996 | 4-(AMINOMETHYL)BENZENESULFONAMIDE ACETATE |
| 3259 N09 | X | 356    | 360    | -0.48761693 | 436    | 440    | -0.41194431 | 1336332  | 0.08265699  | experimental | NIH | SAM002548957 | Zonisamide                                |
| 3259 N10 | X | 315    | 320    | -0.68197877 | 355    | 360    | -0.82968832 | 1165291  | -0.18729182 | experimental | NIH | SAM002589967 | Acyclovir                                 |
| 3259 N11 | X | 475    | 480    | 0.07650646  | 554    | 560    | 0.19662102  | 1309003  | 0.03952446  | experimental | NIH | SAM002548948 | Dexamethasone                             |
| 3259 N12 | X | 675    | 680    | 1.024613    | 395    | 400    | -0.6239498  | 1285819  | 0.00293386  | experimental | NIH | SAM002700174 | Fluorometholone                           |
| 3259 N13 | X | 394    | 400    | -0.30747669 | 435    | 440    | -0.41710165 | 1355338  | 0.11265358  | experimental | NIH | SAM002548963 | Chloramphenicol                           |
| 3259 N14 | E | 596    | 600    | 0.65011092  | 474    | 480    | -0.21596565 | 1186115  | -0.15442593 | empty        |     |              |                                           |
| 3259 N15 | X | 395    | 400    | -0.30273615 | 395    | 400    | -0.6239498  | 1264475  | -0.03075273 | experimental | NIH | SAM002589901 | Cefuroxime                                |
| 3259 N16 | E | 315    | 320    | -0.68197877 | 434    | 440    | -0.42225898 | 1200809  | -0.13123484 | empty        |     |              |                                           |
| 3259 N17 | X | 436    | 440    | -0.10837431 | 674    | 680    | 0.81550103  | 1281327  | -0.00415573 | experimental | NIH | SAM002264591 | ACEBUTOLOL HYDROCHLORIDE                  |
| 3259 N18 | E | 355    | 360    | -0.49235746 | 473    | 480    | -0.22112298 | 1148036  | -0.21452486 | empty        |     |              |                                           |
| 3259 N19 | X | 554    | 560    | 0.45100855  | 553    | 560    | 0.19146369  | 1366443  | 0.13018026  | experimental | NIH | SAM002264600 | CORTISONE ACETATE                         |
| 3259 N20 | E | 433    | 440    | -0.12259591 | 473    | 480    | -0.22112298 | 1021915  | -0.4135778  | empty        |     |              |                                           |
| 3259 N21 | X | 394    | 400    | -0.30747669 | 593    | 600    | 0.39775703  | 976324   | -0.48552269 | experimental | NIH | SAM002554927 | Pyrazinamide                              |
| 3259 N22 | E | 554    | 560    | 0.45100855  | 632    | 640    | 0.59889303  | 1041877  | -0.38207238 | experimental | NIH | SAM002589981 | Doxazosin                                 |
| 3259 N23 | E | 420    | 760    | -0.18422284 | 400    | 720    | -0.59760832 | 83744    | -1.89426455 | empty        |     |              |                                           |
| 3259 N24 | P | 114548 | 115280 | 540.843294  | 107142 | 108000 | 549.906471  | 1173425  | -0.17445418 | empty        |     |              |                                           |
| 3259 O01 | N | 397    | 400    | -0.29325509 | 477    | 480    | -0.20049365 | 1071015  | -0.33608476 | empty        |     |              |                                           |
| 3259 O02 | E | 156    | 160    | -1.43572347 | 116    | 120    | -2.062291   | 81429    | -1.89791825 | empty        |     |              |                                           |
| 3259 O03 | X | 436    | 440    | -0.10837431 | 475    | 480    | -0.21080831 | 1033311  | -0.39559184 | experimental | NIH | SAM002264615 | 5-FLUOROURACIL                            |
| 3259 O04 | X | 395    | 400    | -0.30273615 | 435    | 440    | -0.41710165 | 1228909  | -0.08686547 | experimental | NIH | SAM002554928 | Pyrazinamide                              |
| 3259 O05 | X | 316    | 320    | -0.67723824 | 476    | 480    | -0.20565098 | 1011440  | -0.43011017 | experimental | NIH | SAM002297829 | METYPARONE                                |
| 3259 O06 | X | 355    | 360    | -0.49235746 | 274    | 280    | -1.24743232 | 1112098  | -0.27124471 | experimental | NIH | SAM002554935 | Theophylline                              |
| 3259 O07 | X | 594    | 600    | 0.64062985  | 475    | 480    | -0.21080831 | 1242939  | -0.06474234 | experimental | NIH | SAM002264635 | PREDNISOLONE ACETATE                      |
| 3259 O08 | X | 595    | 600    | 0.64537039  | 755    | 760    | 1.23324503  | 1333453  | 0.07811315  | experimental | NIH | SAM002564195 | BUMETANIDE                                |
| 3259 O09 | X | 355    | 360    | -0.49235746 | 394    | 400    | -0.62855232 | 1099616  | -0.29094467 | experimental | NIH | SAM002264644 | Quinidine hydrochloride monohydrate       |
| 3259 O10 | X | 435    | 440    | -0.11311485 | 275    | 280    | -1.24227499 | 1056847  | -0.35844569 | experimental | NIH | SAM002564204 | (+)-CIS-DILTIAZEM HYDROCHLORIDE           |
| 3259 O11 | X | 435    | 440    | -0.11311485 | 515    | 520    | -0.00451498 | 840020   | -0.70065715 | experimental | NIH | SAM002264652 | Artane                                    |
| 3259 O12 | X | 394    | 400    | -0.30747669 | 394    | 400    | -0.6182376  | 1107036  | -0.2792338  | experimental | NIH | SAM002564212 | Nibyracil                                 |
| 3259 O13 | X | 515    | 520    | 0.26612777  | 274    | 280    | -1.24743232 | 1095732  | -0.29707467 | experimental | NIH | SAM002254914 | Nalidixic Acid                            |
| 3259 O14 | X | 434    | 440    | -0.11785538 | 435    | 440    | -0.41710165 | 983431   | -0.47431593 | experimental | NIH | SAM002564220 | Medroxyprogesterone 17-acetate            |
| 3259 O15 | X | 355    | 360    | -0.49235746 | 355    | 360    | -0.82968832 | 1116629  | -0.26409357 | experimental | NIH | SAM002554889 | Carisoprodol                              |
| 3259 O16 | X | 316    | 320    | -0.67723824 | 475    | 480    | -0.21080831 | 1017200  | -0.42101934 | experimental | NIH | SAM002564228 | Rythmol                                   |
| 3259 O17 | X | 275    | 280    | -0.87160008 | 554    | 560    | 0.19662102  | 1066273  | -0.34356892 | experimental | NIH | SAM002554901 | Hydrochlorothiazide                       |
| 3259 O18 | X | 515    | 520    | 0.26612777  | 513    | 520    | -0.01482964 | 1188686  | -0.1503682  | experimental | NIH | SAM002564236 | TOLAZAMIDE                                |
| 3259 O19 | X | 600    | 600    | 0.63588932  | 713    | 720    | 1.01663703  | 1105394  | -0.28182543 | experimental | NIH | SAM002554911 | Cantil                                    |
| 3259 O20 | X | 834    | 840    | 1.7783577   | 753    | 760    | -1.22293037 |          |             |              |     |              |                                           |

|          |   |        |        |              |        |        |             |         |             |              |             |              |                                                          |
|----------|---|--------|--------|--------------|--------|--------|-------------|---------|-------------|--------------|-------------|--------------|----------------------------------------------------------|
| 3259 P01 | N | 638    | 640    | 0.84921329   | 478    | 480    | -0.19533631 | 800074  | -0.7637027  | empty        |             |              |                                                          |
| 3259 P02 | E | 196    | 200    | -1.24610216  | 277    | 280    | -1.23196032 | 76978   | -1.90494312 | empty        |             |              |                                                          |
| 3259 P03 | X | 437    | 440    | -0.10363378  | 517    | 520    | 0.00579969  | 1061483 | -0.35112883 | experimental | NIH         | SAM002589938 | Azathioprine                                             |
| 3259 P04 | X | 517    | 520    | 0.27560884   | 357    | 360    | -0.81937365 | 951652  | -0.52447176 | experimental | NIH         | SAM002589937 | Glycyrrhizic acid                                        |
| 3259 P05 | X | 196    | 200    | -1.24610216  | 116    | 120    | -2.062291   | 436941  | -0.35682497 | experimental | NIH         | SAM002698984 | Mesifenine hydrochloride                                 |
| 3259 P06 | X | 396    | 400    | -0.29799562  | 437    | 440    | -0.40678698 | 1045391 | -0.37652634 | experimental | NIH         | SAM002589955 | Gatifloxacin                                             |
| 3259 P07 | X | 676    | 680    | 1.02935354   | 476    | 480    | -0.20565098 | 1114946 | -0.2667498  | experimental | NIH         | SAM002699903 | AMCINONIDE                                               |
| 3259 P08 | X | 515    | 520    | 0.26612777   | 435    | 440    | -0.41710165 | 507290  | -1.22579478 | experimental | NIH         | SAM002589997 | THIOTHIXENE                                              |
| 3259 P09 | X | 436    | 440    | -0.10837431  | 476    | 480    | -0.20565098 | 1046077 | -0.37544365 | experimental | NIH         | SAM002548958 | Brimonidine                                              |
| 3259 P10 | X | 516    | 520    | 0.2708683    | 516    | 520    | 0.00064236  | 1055117 | -0.36117609 | experimental | NIH         | SAM002589968 | Etodolac                                                 |
| 3259 P11 | X | 397    | 400    | -0.29325509  | 516    | 520    | 0.00064236  | 854535  | -0.67774856 | experimental | NIH         | SAM002548938 | Cogentin Mesylate                                        |
| 3259 P12 | X | 236    | 240    | -1.05648085  | 235    | 240    | -1.44855832 | 421840  | -1.36065792 | experimental | NIH         | SAM002700175 | Sertraline                                               |
| 3259 P13 | X | 557    | 560    | 0.46523014   | 637    | 640    | 0.6246797   | 1134012 | -0.23665851 | experimental | NIH         | SAM002548961 | Tizanidine hydrochloride                                 |
| 3259 P14 | E | 435    | 440    | -0.11311485  | 556    | 560    | 0.20693569  | 982958  | -0.47506245 | empty        |             |              |                                                          |
| 3259 P15 | X | 717    | 720    | 1.22371538   | 436    | 440    | -0.41194431 | 1139684 | -0.22770657 | experimental | NIH         | SAM002548983 | Cytosax                                                  |
| 3259 P16 | E | 355    | 360    | -0.49235746  | 476    | 480    | -0.20565098 | 877874  | -0.64091333 | empty        |             |              |                                                          |
| 3259 P17 | X | 597    | 600    | 0.65485145   | 355    | 360    | -0.82968832 | 1110932 | -0.27308498 | experimental | NIH         | SAM002264592 | AMOXICILLIN CRYSTALLINE                                  |
| 3259 P18 | E | 515    | 520    | 0.26612777   | 756    | 760    | 1.23840237  | 952954  | -0.52241685 | empty        |             |              |                                                          |
| 3259 P19 | X | 475    | 480    | 0.07050646   | 434    | 440    | -0.42225898 | 621615  | -1.04535911 | experimental | NIH         | SAM002264601 | Anafanil                                                 |
| 3259 P20 | E | 435    | 440    | -0.11311485  | 475    | 480    | -0.21080831 | 968534  | -0.49782741 | empty        |             |              |                                                          |
| 3259 P21 | X | 556    | 560    | 0.46048961   | 635    | 640    | 0.61436503  | 1068455 | -0.34012513 | experimental | NIH         | SAM002589949 | Minoxidil                                                |
| 3259 P22 | E | 554    | 560    | 0.45100855   | 634    | 640    | 0.60920769  | 897032  | -0.61067684 | empty        |             |              |                                                          |
| 3259 P23 | E | 431    | 1000   | -0.13207698  | 345    | 800    | -0.88126165 | 81081   | -1.89846748 | empty        |             |              |                                                          |
| 3259 P24 | X | 194723 | 195080 | 920.915503   | 155229 | 155640 | 797.907161  | 812324  | -0.74436889 | empty        |             |              |                                                          |
| 3260 A01 | N | 1237   | 1240   | 0.99603778   | 1157   | 1160   | 0.37277492  | 2445588 | -0.01683321 | 2141142      | -1.49218396 |              |                                                          |
| 3260 A02 | E | 240    | 240    | -1.80264779  | 232    | 240    | -1.89757414 | 1102459 | -5.118393   | 95127        | -5.29587326 |              |                                                          |
| 3260 A03 | X | 1234   | 1240   | 0.98768336   | 1474   | 1480   | -1.15011233 | 2352502 | -2.1954098  | 241663       | -0.98003006 |              |                                                          |
| 3260 A04 | X | 833    | 840    | -0.12902366  | 1232   | 1240   | 0.55631506  | 2145712 | -0.66985511 | 2931556      | -0.02274738 |              |                                                          |
| 3260 A05 | X | 953    | 960    | 0.205153     | 1192   | 1200   | 0.45816032  | 1998216 | -0.99104826 | 2396507      | -1.01744202 |              |                                                          |
| 3260 A06 | X | 672    | 680    | -0.57737735  | 869    | 880    | -0.33443921 | 2236080 | -0.47306616 | 2786141      | -0.29308434 |              |                                                          |
| 3260 A07 | X | 913    | 920    | 0.09376078   | 1432   | 1440   | 1.04708875  | 2041075 | -0.8977168  | 2898245      | -0.08467493 |              |                                                          |
| 3260 A08 | X | 952    | 960    | 0.2023682    | 1070   | 1080   | 0.15878836  | 2345216 | -0.23540727 | 3101716      | 0.29359232  |              |                                                          |
| 3260 A09 | X | 754    | 760    | -0.3490233   | 1071   | 1080   | 0.16124223  | 1950610 | -1.09471698 | 2949918      | 0.0113889   |              |                                                          |
| 3260 A10 | X | 840    | 840    | -0.31618104  | 1282   | 1282   | 0.6544606   | 1764606 | -1.49976568 | 2482331      | -0.85788902 |              |                                                          |
| 3260 A11 | X | 553    | 560    | -0.90876921  | 832    | 840    | -0.42523234 | 2321452 | -0.2871567  | 2949820      | 0.01120671  |              |                                                          |
| 3260 A12 | X | 873    | 880    | -0.01763144  | 789    | 800    | -0.53074869 | 2181104 | -0.59278408 | 2965878      | 0.04105969  |              |                                                          |
| 3260 A13 | X | 714    | 720    | -0.46041552  | 871    | 880    | -0.32953147 | 2086777 | -0.79819431 | 2394199      | -1.02173276 |              |                                                          |
| 3260 A14 | X | 473    | 480    | -1.13155366  | 913    | 920    | -0.226469   | 2326622 | -0.47188888 | 2585115      | -0.66680616 |              |                                                          |
| 3260 A15 | X | 994    | 1000   | 0.31933003   | 912    | 920    | -0.22892286 | 2195944 | -0.56046791 | 2535325      | -0.75936936 |              |                                                          |
| 3260 A16 | X | 912    | 920    | 0.09097598   | 870    | 880    | -0.33198534 | 2406058 | -0.10291531 | 2780947      | -0.30274036 |              |                                                          |
| 3260 A17 | X | 1000   | 1000   | 0.31376042   | 1282   | 1272   | 0.6544606   | 1764606 | -1.49976568 | 2482331      | -0.85788902 |              |                                                          |
| 3260 A18 | X | 1112   | 1120   | 0.07937309   | 990    | 1000   | -0.03752112 | 2663783 | 0.4583169   | 3042572      | 0.18363937  |              |                                                          |
| 3260 A19 | X | 910    | 920    | 0.08540637   | 1228   | 1240   | 0.54649958  | 2255887 | -0.42993365 | 2641381      | -0.56220361 |              |                                                          |
| 3260 A20 | X | 831    | 840    | -0.13459327  | 1109   | 1120   | 0.25448923  | 2151186 | -0.65793471 | 2968989      | 0.04684327  |              |                                                          |
| 3260 A21 | X | 1270   | 1280   | 1.08793636   | 1548   | 1560   | 1.3317375   | 1508778 | -2.05668791 | 1957260      | -1.83403384 |              |                                                          |
| 3260 A22 | X | 1451   | 1480   | 1.59198617   | 1570   | 1600   | 1.38572261  | 2210092 | -0.5295866  | 3027741      | 0.15606747  |              |                                                          |
| 3260 A23 | E | 4342   | 7000   | 9.64285899   | 4310   | 7200   | 8.1093223   | 1022554 | -5.11911719 | 1808031      | -5.2718838  |              |                                                          |
| 3260 A24 | X | 910478 | 912160 | 2533.055442  | 9914   | 9920   | 2430.57814  | 1606408 | -1.8474694  | 2897688      | -1.66921267 |              |                                                          |
| 3260 B01 | N | 793    | 800    | -0.20041588  | 793    | 800    | -0.32462374 | 2085939 | -8.0001917  | 2573537      | -0.6883305  |              |                                                          |
| 3260 B02 | E | 194    | 200    | -1.9085144   | 194    | 200    | -1.99080045 | 106098  | -5.12315889 | 114361       | -5.26011587 |              |                                                          |
| 3260 B03 | X | 952    | 960    | 0.2023682    | 671    | 680    | -0.82030517 | 2404168 | -0.10703105 | 2988325      | 0.08279028  |              | 3-Bromo-7-nitroindazole                                  |
| 3260 B04 | X | 191    | 200    | -1.91686882  | 229    | 240    | -1.90491505 | 818559  | -3.55991624 | 901700       | -3.79639594 |              | Chelerythrine chloride; 1,2-Dimethoxy-N-methyl(1,3)be-   |
| 3260 B05 | X | 832    | 840    | -0.13180847  | 709    | 720    | -0.72705817 | 2540047 | 0.18886446  | 3399708      | 0.84758092  |              | Bumetanide; 3-(Aminosulfonyl-5)-(butylamino)-4-phenc     |
| 3260 B06 | X | 831    | 840    | -0.13459327  | 1310   | 1320   | 0.7477168   | 1632600 | -1.7872282  | 2042346      | -1.67585284 |              | Cyclosporin A; Antibiotic C 3662                         |
| 3260 B07 | X | 790    | 800    | -0.2487703   | 827    | 840    | -0.43750169 | 2420497 | -0.07147237 | 3379445      | 0.80991054  |              | (4)-Baclofen; Lioreal                                    |
| 3260 B08 | X | 952    | 960    | 0.2023682    | 949    | 960    | -0.13812973 | 2379731 | -0.16024603 | 3393075      | 0.8352497   |              | Carbachol; Carbamylcholine chloride                      |
| 3260 B09 | X | 431    | 440    | -1.24851549  | 949    | 960    | -0.13812973 | 1706440 | -1.62643128 | 2709490      | -0.43558407 |              | Brefeldin A from Penicillium brefeldianum; BFA; Ascotoci |
| 3260 B10 | X | 592    | 600    | -0.8001618   | 910    | 920    | -0.23383006 | 2390699 | -0.13636168 | 3199469      | 0.47532219  |              | Cephalexin hydrate                                       |
| 3260 B11 | X | 792    | 800    | -0.24320069  | 787    | 800    | -0.53565643 | 2553003 | 0.21707796  | 3020036      | 0.14174332  |              | BP 897; N-[4-(2-methoxyphenyl)piperazinyl]butyl]-2       |
| 3260 B12 | X | 1032   | 1040   | 0.42515264   | 1949   | 1960   | 2.31573877  | 1829085 | -1.35935465 | 2211794      | -1.3608368  |              | Roscovitine; (R)-2-(1-Ethyl-2-hydroxyethylamino)-6-ber   |
| 3260 B13 | X | 632    | 640    | -0.68876958  | 7467   | 1480   | 1.13297415  | 2699942 | 0.53705817  | 3449848      | 0.94079479  |              | Bupropion hydrochloride; (4)-1-(3-Chlorophenyl)-2-[(1,   |
| 3260 B14 | X | 552    | 560    | -0.91155402  | 1067   | 720    | -0.73441978 | 2103725 | -0.76128767 | 2792440      | -0.28137405 |              | Cyproheptadine hydrochloride                             |
| 3260 B15 | X | 831    | 840    | -0.13459327  | 870    | 1080   | 0.15878836  | 2822086 | 0.8038438   | 3627438      | 1.2709474   |              | BL224 hydrochloride; 2-(4,5-Dihydroimidazol-2-yl)-quin   |
| 3260 B16 | X | 750    | 760    | -0.36016252  | 1110   | 1120   | 0.2569431   | 2814827 | 0.78723631  | 3632722      | 1.28077074  |              | Sigma-Aldrich M5793                                      |
| 3260 B17 | X | 747    | 760    | -0.35737772  | 747    | 760    | -0.63381117 | 2485108 | 0.06922711  | 3796041      | 1.58439252  |              | Sigma-Aldrich C 0330                                     |
| 3260 B18 | X | 788    | 800    | -0.25433991  | 1027   | 1040   | 0.05327201  | 1334111 | -2.43722971 | 1576961      | -2.54103709 |              | Sigma-Aldrich C 7632                                     |
| 3260 B19 | X | 1429   | 1440   | 1.53072044   | 1866   | 1880   | 2.11206768  | 2442070 | -0.02449415 | 3331432      | 0.72065092  |              | Sigma-Aldrich C 0862                                     |
| 3260 B20 | X | 987    | 1000   | 0.29983639   | 1064   | 1080   | 0.14406515  | 1475830 | -2.12861678 | 1803172      | -2.12049454 |              | Sigma-Aldrich C 8138                                     |
| 3260 B21 | X | 1105   | 1120   | 0.62844345   | 1304   | 1320   | 0.73299339  | 1738876 | -1.55579735 | 2489233      | -0.84505771 |              | Sigma-Aldrich C 1671                                     |
| 3260 B22 | X | 1816   | 1840   | 2.60840419   | 1656   | 1800   | 1.5627553   | 2557644 | -1.22718449 | 2976288      | 0.06041263  |              | Sigma-Aldrich C 8773                                     |
| 3260 B23 | E | 2619   | 4320   | 8.44639604   | 2294   | 3720   | 2.1592320   | 109533  | -5.10391944 | 1780226      | -5.25330237 |              |                                                          |
| 3260 B24 | P | 569465 | 573960 | 1583.40052   | 473750 | 478560 | 1160.05335  | 2034951 | -0.91105266 | 2756721      | -0.34778724 |              | empty                                                    |
| 3260 C01 | N | 1114   | 1120   | 0.6535067    | 1073   | 1080   | 0.16614996  | 3227349 | 1.68556062  | 2853549      | -0.16776801 |              | empty                                                    |
| 3260 C02 | E | 192    | 200    | -1.91408401  | 272    | 280    | -1.7993987  | 101547  | -5.12131007 | 99080        | -5.28852435 |              | empty                                                    |
| 3260 C03 | X | 1153   | 1160   | 0.76211411   | 1192   | 1200   | 0.45816032  | 2477547 | 0.05276198  | 2876832      | -0.12448324 |              | experimental                                             |
| 3260 C04 | X | 512    | 520    | -0.102294624 | 991    | 1000   | -0.03506725 | 2817540 | 0.79314425  | 3372314      | 0.7966535   |              | Sigma-Aldrich 144509                                     |
| 3260 C05 | X | 752    | 760    | -0.35459291  | 870    | 880    | -0.33198534 | 2720270 | -0.39861266 | 2717696      | -0.42032853 |              | Sigma-Aldrich 861669                                     |
| 3260 C06 | X | 804    | 800    | -0.33688030  | 868    | 880    | -0.43570645 | 2627166 | 0.10825074  | 2878474      | 0.03638176  |              | Sigma-Aldrich A 7845                                     |
| 3260 C07 | X | 712    | 720    | -0.46598513  | 830    | 840    | -0.43014008 | 2449519 | -0.00827291 | 2878506      | -0.12137115 |              | Sigma-Aldrich O7639                                      |
| 3260 C08 | X | 511    | 520    | -0.102573105 | 911    | 920    | -0.23137673 | 3221340 | 1.67247518  | 3571873      | 1.16764806  |              | experimental                                             |
| 3260 C09 | X | 794    | 800    | -0.23763108  | 790    | 800    | -0.52829482 | 2630617 | 0.3860933   | 3129910      | 0.346007    |              | Sigma-Aldrich A 1755                                     |
| 3260 C10 | X | 592    | 600    | -0.8001618   | 590    | 600    | -0.10968652 | 2679217 | 0.49192659  | 3485708      | 1.00746112  |              | experimental                                             |
| 3260 C11 | X | 632    | 640    | -0.68876958  | 831    | 840    |             |         |             |              |             |              |                                                          |





|          |   |        |        |             |        |        |             |          |             |         |             |              |                               |                                                              |
|----------|---|--------|--------|-------------|--------|--------|-------------|----------|-------------|---------|-------------|--------------|-------------------------------|--------------------------------------------------------------|
| 3260 K07 | X | 790    | 800    | -0.2487703  | 752    | 760    | -0.62154182 | 2447798  | -0.01202063 | 2546289 | -0.73898649 | experimental | Sigma-Aldrich A 0937          | (Φ)-Norepinephrine (+)bitartrate; (Φ)-Arterenol (+)bita      |
| 3260 K08 | X | 672    | 680    | -0.57737735 | 471    | 480    | -1.31107887 | 3241710  | 1.7168337   | 3704152 | 1.41356425  | experimental | Sigma-Aldrich A 9256          | L-Aspartic acid                                              |
| 3260 K09 | X | 553    | 560    | -0.90876921 | 753    | 760    | -0.61908796 | 2260708  | -0.42080716 | 2771838 | -0.31967465 | experimental | Sigma-Aldrich A 1895          | Aurintricarboxylic acid; ATA                                 |
| 3260 K10 | X | 513    | 520    | -1.02016144 | 591    | 600    | -1.01661465 | 3256012  | 1.74787831  | 3445382 | 0.93294218  | experimental | Sigma-Aldrich A 9639          | (Φ)-HA-966; (Φ)-3-Amino-1-hydroxy-2-pyrrolidone              |
| 3260 K11 | X | 554    | 560    | -0.90589441 | 593    | 600    | -1.0170692  | 2258978  | -0.49448978 | 2662215 | -0.5234717  | experimental | 3-Aminopropionitrile fumarate | 3-Aminopropionitrile fumarate                                |
| 3260 K12 | X | 552    | 560    | -0.91155402 | 791    | 800    | -0.52584095 | 1325430  | 1.46361775  | 3756379 | 1.51065801  | experimental | Sigma-Aldrich A-013           | 8-(p-Sulfophenyl)theophylline                                |
| 3260 K13 | X | 752    | 760    | -0.35459291 | 792    | 800    | -0.5238708  | 2203478  | -0.54406157 | 2847304 | -0.17937792 | experimental | Sigma-Aldrich A 3940          | 1-Aminobenzotriazole; A8T; 1-Benzotriazolamine               |
| 3260 K14 | X | 792    | 800    | -0.24320069 | 707    | 680    | -0.82275904 | 2379725  | -0.62369121 | 3593018 | 1.20695814  | experimental | Sigma-Aldrich A-140           | Arcaidine propargyl ester hydrobromide; APE                  |
| 3260 K15 | X | 520    | 520    | -1.02851585 | 609    | 720    | -0.72705817 | 2173944  | -0.60837598 | 2718454 | -0.41891935 | experimental | Sigma-Aldrich S 9318          | Sandoz 58-035; 3-[Decyldimethylsilyl]-N-[2-(4-methylp        |
| 3260 K16 | X | 951    | 960    | 0.19958339  | 1071   | 1080   | 0.16124223  | 3277045  | 1.79378061  | 3782834 | 1.45833443  | experimental | Sigma-Aldrich P 9872          | Psora-4; 5-(4-Phenylbutoxy)psoralen                          |
| 3260 K17 | X | 790    | 800    | 0.2487703   | 870    | 880    | -0.33198534 | 2436626  | -0.03634922 | 3061908 | 0.21958638  | experimental | Sigma-Aldrich A 5626          | Acetylthiocholine chloride                                   |
| 3260 K18 | X | 870    | 880    | -0.02598586 | 668    | 680    | -0.82766678 | 2828389  | 0.81676946  | 3478414 | 0.98981109  | experimental | Sigma-Aldrich A-230           | gamma-Acetylnicotinic GABA; A-3-Amino-5-hexynoic acid        |
| 3260 K19 | X | 949    | 960    | 0.19401378  | 1228   | 1240   | 0.54649958  | 2301374  | -0.33087935 | 2458801 | -0.90163299 | experimental | Sigma-Aldrich A 6351          | A-315456; N-[3-(cyclohexylidene)-1H-imidazol-4-yl]meth       |
| 3260 K20 | X | 947    | 960    | 0.18844417  | 1026   | 1040   | 0.05081814  | 2964203  | 1.11252343  | 3743391 | 1.48651238  | experimental | Sigma-Aldrich A-263           | ATPA; (RS)-2-Amino-3-(3-hydroxy-5-tert-butylisoxazol-        |
| 3260 K21 | X | 1225   | 1240   | 0.96262011  | 1305   | 1320   | 0.73544746  | 2067333  | -0.84053633 | 2545341 | -0.74074889 | experimental | Sigma-Aldrich A 7127          | Agmatine sulfate; (4-Aminobutyl)guanadine sulfate            |
| 3260 K22 | X | 1776   | 1800   | 2.49704797  | 1576   | 1600   | 1.40044582  | 2639108  | 0.40458363  | 2554601 | -0.72353388 | experimental | Sigma-Aldrich T6951           | TBBz; 4,5,6,7-Tetrabromobenzimidazole                        |
| 3260 K23 | E | 2832   | 4280   | 4.3780262   | 2956   | 4400   | 4.78678435  | 100918   | -5.12267981 | 117427  | -5.25441595 | empty        |                               |                                                              |
| 3260 K24 | P | 487329 | 490240 | 1354.66773  | 486162 | 489120 | 1190.51077  | 1939445  | -1.11903033 | 2181340 | -1.41745298 | empty        |                               |                                                              |
| 3260 L01 | N | 714    | 720    | -0.46041552 | 794    | 800    | -0.51847935 | 1703538  | -1.62878748 | 2483634 | -0.85548665 | empty        |                               |                                                              |
| 3260 L02 | E | 312    | 320    | -1.57990735 | 313    | 320    | -1.6987901  | 91989    | -5.14212395 | 107590  | -5.27270365 | empty        |                               |                                                              |
| 3260 L03 | X | 1193   | 1200   | 0.87350633  | 993    | 1000   | -0.03015952 | 2601073  | 0.32157111  | 2973243 | 0.05475176  | experimental | Sigma-Aldrich B 2417          | Benzamil hydrochloride; N-(Benzylamino)-3,5-diamino          |
| 3260 L04 | X | 590    | 600    | -0.80573141 | 471    | 480    | -1.31107887 | 991904   | -3.18243327 | 1232955 | -3.18056903 | experimental | Sigma-Aldrich C 3353          | CGP-74514A hydrochloride; N2-(cis-2-Aminocyclohexyl)         |
| 3260 L05 | X | 912    | 920    | 0.09097598  | 671    | 680    | -0.82030517 | 2938184  | 1.05586342  | 3196821 | 0.47033937  | experimental | Sigma-Aldrich B 5002          | 5-Bromo-2'-deoxyuridine; Br-dU; 5-Bromo-1-(2-deoxy-1         |
| 3260 L06 | X | 828    | 840    | -0.14294769 | 869    | 880    | -0.33443921 | 2276587  | -0.28485651 | 3257544 | 0.58328276  | experimental | Sigma-Aldrich C 4024          | Carbamazepine; 5H-Dibenz[b,f]azepine-5-carboxamide           |
| 3260 L07 | X | 872    | 880    | -0.02041624 | 791    | 800    | -0.52584095 | 3468975  | 2.211735    | 3265244 | 0.59760268  | experimental | Sigma-Aldrich B 7005          | Betamethasone; 9alpha-Fluoro-16beta-methylprednisol          |
| 3260 L08 | X | 689    | 690    | -0.58731177 | 791    | 800    | -0.52584095 | 2379286  | -0.16151508 | 2484577 | 0.52923334  | experimental | Sigma-Aldrich C 9398          | Cytidine; SKF-92334; Tagamet                                 |
| 3260 L09 | X | 553    | 560    | -0.90876921 | 631    | 640    | -0.9485991  | 2018569  | -0.69074952 | 2334907 | -1.13196086 | experimental | Sigma-Aldrich B 8385          | Bestatin hydrochloride; N-[(2S,3R)-3-Amino-2-hydroxy-        |
| 3260 L10 | X | 714    | 720    | -0.46041552 | 794    | 800    | -0.51847935 | 1911710  | -1.17942716 | 2840866 | -0.19134662 | experimental | Sigma-Aldrich C 5134          | 2-Chloroadenosine; 2-CADO                                    |
| 3260 L11 | X | 347    | 360    | -1.48243916 | 387    | 400    | -1.51720383 | 1017807  | -3.12602587 | 1109816 | -3.57680978 | experimental | Sigma-Aldrich B-015           | Bromoacetyl alprenolol methane                               |
| 3260 L12 | X | 794    | 800    | -0.23763108 | 793    | 800    | -0.52093322 | 2171780  | -0.61308839 | 2867979 | -0.1409416  | experimental | Sigma-Aldrich C 5976          | Cl 316,243; Disodium 5-(2R)-2-[[[(2R)-2-(3-Chlorophe         |
| 3260 L13 | X | 591    | 600    | -0.8029466  | 551    | 560    | -1.11476939 | 2821932  | 0.80270844  | 3261968 | 0.59151234  | experimental | Sigma-Aldrich B-135           | R(+)-6-Bromo-APB hydrobromide; R(+)-6-Bromo-7,8-d            |
| 3260 L14 | X | 787    | 800    | -0.25712472 | 864    | 880    | -0.34670855 | 1904074  | -1.19605562 | 2112690 | -1.54507827 | experimental | Sigma-Aldrich C 6628          | Chloroquine diphosphate                                      |
| 3260 L15 | X | 871    | 880    | -0.02320105 | 830    | 840    | -0.43014008 | 2724893  | 0.59139246  | 3296367 | 0.65546256  | experimental | Sigma-Aldrich B 5311          | Biperiden hydrochloride; 1-(5-Bicyclo[2.2.1]hept-2-enyl      |
| 3260 L16 | X | 400    | 400    | 4.84181623  | 737    | 740    | -0.95018911 | 992729   | -1.2525902  | 2292913 | -1.04186787 | experimental | Sigma-Aldrich C 7255          | Cyproheptadine hydrochloride; Decarboxycystidine dihydro     |
| 3260 L17 | X | 830    | 840    | -0.13737808 | 870    | 880    | -0.33198534 | 2935288  | 1.04955698  | 3786878 | 1.56735785  | experimental | Sigma-Aldrich C 0737          | Clotazolol; OPC 13013; OPC 21; Pletaal                       |
| 3260 L18 | X | 910    | 920    | 0.08540637  | 949    | 960    | -0.13812973 | 2191865  | -0.5693505  | 2730139 | -0.39719609 | experimental | Sigma-Aldrich C 8011          | Chelidamide; 4-Hydroxypyridine-2,6-dicarboxylic acid         |
| 3260 L19 | X | 789    | 800    | -0.25155511 | 1146   | 1160   | 0.34528236  | 2805047  | 0.765939    | 3648231 | 1.30960308  | experimental | Sigma-Aldrich C 1251          | (+)-Catechin Hydrate; (+)-Cyanidol-3                         |
| 3260 L20 | X | 909    | 920    | 0.08262156  | 1107   | 1120   | 0.24958149  | 2080780  | -0.81125361 | 2934132 | -0.10795841 | experimental | Sigma-Aldrich A9361           | Artemether; Dihydroartemisinin methyl ether, Dihydroq        |
| 3260 L21 | X | 1187   | 1200   | 0.8567975   | 1186   | 1200   | 0.44343771  | 2964596  | 1.11337924  | 3358801 | 0.77153186  | experimental | Sigma-Aldrich C 2505          | Corticosterone; Kendall's Compound B; 4-Pregnene-11b         |
| 3260 L22 | X | 1495   | 1520   | 1.71451761  | 1377   | 1400   | 0.91212599  | 2087284  | -0.79709024 | 2576988 | -0.68191484 | empty        |                               |                                                              |
| 3260 L23 | E | 2619   | 4000   | 4.84181623  | 737    | 740    | -0.95018911 | 992729   | -1.2525902  | 2292913 | -1.04186787 | empty        |                               |                                                              |
| 3260 L24 | P | 464747 | 467640 | 1291.78126  | 472213 | 475040 | 1156.28175  | 797877   | 0.74141872  | 3066922 | 0.22880777  | empty        |                               |                                                              |
| 3260 M01 | N | 915    | 920    | 0.09933039  | 955    | 960    | -0.12340652 | 3112535  | 1.43535709  | 3241768 | 0.55395908  | empty        |                               |                                                              |
| 3260 M02 | E | 434    | 440    | -1.24016107 | 353    | 360    | -1.60063536 | 293954   | -4.70231694 | 100920  | -5.28510366 | empty        |                               |                                                              |
| 3260 M03 | X | 551    | 560    | -0.91433882 | 791    | 800    | -0.52584095 | 2078200  | -0.81687111 | 2330244 | -1.14062971 | experimental | Sigma-Aldrich 246557          | Tryptamine hydrochloride; 3-(2-Aminoethyl)indole hydr        |
| 3260 M04 | X | 673    | 680    | -0.57459255 | 752    | 760    | -0.62154182 | 2939325  | 1.05834921  | 3617839 | 1.25310217  | experimental | Sigma-Aldrich A 7762          | L-allylglycine; L-2-Amino-4-pentenoic acid                   |
| 3260 M05 | X | 629    | 640    | -0.69712399 | 909    | 920    | -0.23628447 | 1879018  | -1.25061856 | 2456016 | -0.9068105  | experimental | Sigma-Aldrich A 0384          | Arcaine sulfate; N,N'-1,4-Butanedithiylbis(guanidine) sulfat |
| 3260 M06 | X | 1472   | 1480   | -0.65046708 | 1351   | 1360   | -0.33909911 | 2905945  | 0.98165849  | 2651905 | 0.51552648  | experimental | Sigma-Aldrich A 8598          | Anticabine hydrochloride; Cyclocytidine hydrochloride; C     |
| 3260 M07 | X | 543    | 560    | -0.92826285 | 3428   | 640    | 0.92582152  | 22963625 | 0.25678152  | 2614445 | 0.18629682  | experimental | Sigma-Aldrich A 0966          | 4-Amino-1,8-naphthalimide                                    |
| 3260 M08 | X | 1593   | 1600   | -1.98742855 | 1071   | 1080   | 0.16124223  | 2925203  | 1.02795448  | 3582627 | 1.18764052  | experimental | Sigma-Aldrich A 9335          | Astaxanthin; 3,3'-Dihydroxy-beta,beta-carotene-4,4'-dic      |
| 3260 M09 | X | 509    | 520    | -1.03130066 | 671    | 680    | -0.32953147 | 2176578  | -0.60264008 | 2622228 | -0.59781042 | experimental | Sigma-Aldrich A 1910          | (Φ)-2-Amino-4-phosponobutyric acid; (Φ)-AP-4                 |
| 3260 M10 | X | 748    | 760    | -0.36573213 | 586    | 600    | -1.028884   | 2742939  | 0.63069015  | 3027656 | 0.15590945  | experimental | Sigma-Aldrich L 6668          | Lercanidipine hydrochloride hemihydrate                      |
| 3260 M11 | X | 2272   | 2280   | 3.87831152  | 2192   | 2200   | 2.91202881  | 2048379  | -0.88181132 | 2013226 | -1.72998902 | experimental | Sigma-Aldrich A 3145          | Agipenin; 4',5,7-Trihydroxyflavone                           |
| 3260 M12 | X | 707    | 720    | -0.47990916 | 587    | 600    | -1.02643013 | 2931840  | 1.04204847  | 3707671 | 1.42010633  | experimental | Sigma-Aldrich A-022           | 1,3-Dipropyl-8-p-sulfophenylxanthine                         |
| 3260 M13 | X | 668    | 680    | -0.58851658 | 704    | 720    | -0.73932751 | 1759392  | -1.5111209  | 2278354 | -1.23709696 | experimental | Sigma-Aldrich A 4147          | 3-Amino-1-propanesulfonic acid sodium                        |
| 3260 M14 | X | 2152   | 2160   | 3.54413485  | 3471   | 3480   | 6.05052662  | 2043436  | -0.89257539 | 2272013 | -1.24888534 | experimental | Sigma-Aldrich 10404           | Indinibin-3'-oxime                                           |
| 3260 M15 | X | 782    | 800    | -0.27104874 | 895    | 920    | -0.27063863 | 2126876  | -0.71087313 | 2685867 | -0.47950093 | experimental | Sigma-Aldrich A 4910          | (Φ)-2-Amino-3-phosponopropionic acid; (Φ)-AP-3               |
| 3260 M16 | X | 1431   | 1440   | -1.53629005 | 2670   | 2680   | 0.408497796 | 2645734  | 0.41901268  | 3055112 | 1.04353455  | experimental | Sigma-Aldrich S 0568          | SB 200646 hydrochloride; N-(1-Methyl-1H-indol-5-yl)-N        |
| 3260 M17 | X | 828    | 840    | -0.14294769 | 864    | 880    | -0.34670855 | 1734466  | -1.56540075 | 2262720 | -1.25770292 | experimental | Sigma-Aldrich T3955           | TNP                                                          |
| 3260 M18 | X | 869    | 880    | -0.02877066 | 1067   | 1080   | 0.15142675  | 2693084  | 0.52212392  | 3847863 | 1.68073336  | experimental | Sigma-Aldrich A-236           | AB-MECA; N6-(4-Aminobenzyl)-9-[5-(methylcarbonyl)-b          |
| 3260 M19 | X | 990    | 1000   | 0.30819081  | 1548   | 1560   | 1.3317375   | 1721645  | -1.59332062 | 2396184 | -1.0180425  | experimental | Sigma-Aldrich G 8543          | Sigma-Aldrich A 2654                                         |
| 3260 M20 | X | 949    | 960    | 0.19401378  | 1026   | 1040   | 0.05081814  | 2874631  | 0.91746788  | 3704313 | 1.41386356  | experimental | Sigma-Aldrich A-265           | ARL 67156 trisodium salt; FPL 67156                          |
| 3260 M21 | X | 946    | 960    | 0.18565937  | 1105   | 1120   | 0.24467375  | 1852121  | -1.30919054 | 2524906 | -0.77873903 | experimental | Sigma-Aldrich A 7200          | 4-Aminobenzamide hydrochloride                               |
| 3260 M22 | X | 1615   | 1640   | 2.04869427  | 1416   | 1440   | 1.00782686  | 2884369  | 0.93867374  | 3223807 | 0.52056829  | experimental | Sigma-Aldrich A P20005        | Vericizone                                                   |
| 3260 M23 | E | 2547   | 4040   | 4.64413304  | 2452   | 3880   | 3.55003462  | 124157   | -5.07207364 | 109973  | -5.26827348 | empty        |                               |                                                              |
| 3260 M24 | P | 501816 | 504920 | 1395.01121  | 480646 | 483520 | 1176.97523  | 1896407  | -1.21275159 | 2138659 | -1.49680003 | empty        |                               |                                                              |
| 3260 N01 | N | 713    | 720    | -0.46320033 | 553    | 560    | -1.10986166 | 1807253  | -1.40689688 | 2413369 | -0.98609435 | empty        |                               |                                                              |
| 3260 N02 | E | 313    | 320    | -1.57712254 | 474    | 480    | -1.30371727 | 93047    | -5.13982001 | 107376  | -5.27310149 | empty        |                               |                                                              |
| 3260 N03 | X | 753    | 760    | -0.3518081  | 831    | 840    | -0.42768621 | 2711176  | 0.56152178  | 3173646 | 0.42731537  | experimental | Sigma-Aldrich B 2515          | L-Buthionine-sulfoximine                                     |
| 3260 N04 | X | 511    | 520    | -1.02573105 | 591    | 600    | -1.01661465 | 1984010  | -0.2198381  | 2594227 | -0.65789694 |              |                               |                                                              |

|          |   |         |        |             |        |        |             |         |             |         |             |   |              |
|----------|---|---------|--------|-------------|--------|--------|-------------|---------|-------------|---------|-------------|---|--------------|
| 3260 001 | N | 1193    | 1200   | 0.87350633  | 834    | 840    | -0.42032461 | 2824095 | 0.80741868  | 2857452 | -0.16051205 |   | empty        |
| 3260 002 | E | 352     | 360    | -1.46851513 | 352    | 360    | -1.60308922 | 100049  | -5.12457217 | 96831   | -5.2927054  |   | empty        |
| 3260 003 | X | 1111    | 1120   | 0.64515228  | 1192   | 1200   | 0.45816032  | 2600205 | 0.31986692  | 2751911 | -0.35672038 |   | experimental |
| 3260 004 | X | 870     | 880    | -0.33198534 | 870    | 880    | -0.33198534 | 2926807 | 1.03108841  | 3108899 | 0.30659404  |   | experimental |
| 3260 005 | X | 671     | 680    | -0.58011616 | 671    | 680    | -0.82030517 | 2954888 | 1.12593296  | 2798940 | -0.26929008 |   | experimental |
| 3260 006 | X | 751     | 760    | -0.35737772 | 549    | 560    | -1.11967713 | 2486808 | 0.0729291   | 2709095 | -0.43631841 |   | experimental |
| 3260 007 | X | 1191    | 1200   | 0.86793672  | 1391   | 1400   | 0.94648015  | 2365762 | -0.19066548 | 2831846 | -0.20811545 |   | experimental |
| 3260 008 | X | 711     | 720    | -0.46876994 | 790    | 800    | -0.52829482 | 2728459 | 0.59915792  | 3261221 | 0.59012361  |   | experimental |
| 3260 009 | X | 672     | 680    | -0.57737735 | 631    | 640    | -0.91845991 | 2462190 | 0.01931997  | 2814391 | -0.24056556 |   | experimental |
| 3260 010 | X | 351     | 360    | -1.47129993 | 349    | 360    | -1.61045083 | 850461  | -3.49404517 | 909563  | -3.78177805 |   | experimental |
| 3260 011 | X | 792     | 800    | -0.24232069 | 831    | 840    | -0.42768621 | 2249684 | -0.44344155 | 2623921 | -0.59466301 |   | experimental |
| 3260 012 | X | 630     | 640    | -0.69433919 | 714    | 720    | -0.72215043 | 2704724 | 0.54747164  | 3088010 | 0.25455924  |   | experimental |
| 3260 013 | X | 951     | 960    | 0.19589339  | 870    | 880    | -0.33198534 | 1944181 | -1.10871702 | 2317083 | -1.16509696 |   | experimental |
| 3260 014 | X | 589     | 600    | -0.80851621 | 1108   | 1120   | 0.25203536  | 2511019 | 0.12565194  | 3011243 | 0.29271298  |   | experimental |
| 3260 015 | X | 1025    | 1040   | 0.405659    | 821    | 840    | -0.4522249  | 2321943 | -0.28608748 | 3073857 | 0.24180043  |   | experimental |
| 3260 016 | X | 2111    | 2120   | 3.42995782  | 2670   | 2680   | 4.08497796  | 2296059 | -0.3424535  | 2925588 | -0.03384232 | W | experimental |
| 3260 017 | X | 945     | 960    | 0.18287456  | 824    | 840    | -0.44486329 | 2266251 | -0.40736459 | 3127581 | 0.34167722  |   | experimental |
| 3260 018 | X | 1029    | 1040   | 0.41679823  | 948    | 960    | -0.1405836  | 2447804 | -0.01200756 | 3122231 | 0.33173118  |   | experimental |
| 3260 019 | X | 909     | 920    | 0.08262156  | 1148   | 1160   | 0.3501901   | 2399394 | -0.1174271  | 3132035 | 0.349995753 |   | experimental |
| 3260 020 | X | 1022    | 1040   | 0.39730459  | 1179   | 1200   | 0.42626002  | 2574282 | 0.26341596  | 3296802 | 0.65493272  |   | experimental |
| 3260 021 | X | 1225    | 1240   | 0.96262011  | 1104   | 1120   | 0.24221989  | 2271847 | -0.39517852 | 2861024 | -0.15387145 |   | experimental |
| 3260 022 | X | 1493    | 1520   | 1.708948    | 1493   | 1520   | 1.19677473  | 2314755 | -0.30174035 | 2903927 | -0.07411168 |   | experimental |
| 3260 023 | E | 3189    | 4960   | 6.4319782   | 2972   | 4840   | 4.82604624  | 97614   | -5.12987473 | 108734  | -5.27057687 |   | empty        |
| 3260 024 | P | 592338  | 597160 | 1647.09738  | 629131 | 632960 | 1541.33789  | 1899083 | -1.20535632 | 2352795 | -1.09870578 |   | empty        |
| 3260 N1  | N | 1276    | 1280   | 1.10464519  | 997    | 1000   | -0.02034404 | 1568383 | -1.92706969 | 2092950 | -1.58177636 |   | empty        |
| 3260 P12 | E | 272     | 280    | -1.69129497 | 314    | 320    | -1.69129497 | 280     | -1.69129497 | 280     | -1.69129497 |   | empty        |
| 3260 P03 | X | 1034    | 1040   | 0.43072225  | 833    | 840    | -0.42277848 | 2261018 | -0.9616018  | 2638404 | -0.56773063 |   | experimental |
| 3260 P04 | X | 792     | 800    | -0.24320069 | 953    | 960    | -0.12831426 | 2194622 | -0.56334675 | 2688748 | -0.47414495 |   | experimental |
| 3260 P05 | X | 834     | 840    | -0.12623886 | 793    | 800    | -0.52093322 | 173222  | -0.60994824 | 2562991 | -0.70793627 |   | experimental |
| 3260 P06 | X | 753     | 760    | -0.3518081  | 793    | 800    | -0.52093322 | 1704813 | -0.62997473 | 2109141 | -1.55167612 |   | experimental |
| 3260 P07 | X | 872     | 880    | -0.02041624 | 912    | 920    | -0.22892286 | 2513232 | 0.13047105  | 2928369 | -0.02867224 |   | experimental |
| 3260 P08 | X | 633     | 640    | -0.68598477 | 632    | 640    | -0.91600604 | 1796507 | -1.4302978  | 2245259 | -1.29862295 |   | experimental |
| 3260 P09 | X | 834     | 840    | -0.12623886 | 912    | 920    | -0.22892286 | 2409289 | -0.09587936 | 2887692 | -0.10429377 |   | experimental |
| 3260 P10 | X | 834     | 840    | -0.12623886 | 912    | 920    | -0.22892286 | 2409289 | -0.09587936 | 2887692 | -0.10429377 |   | experimental |
| 3260 P11 | X | 633     | 640    | -0.68598477 | 792    | 800    | -0.52387808 | 2168997 | -0.61914877 | 2568420 | -0.69784337 |   | experimental |
| 3260 P12 | X | 714     | 720    | -0.46041552 | 554    | 560    | -1.10740779 | 1377489 | -2.34276805 | 1517189 | -2.65215754 |   | experimental |
| 3260 P13 | X | 912     | 920    | 0.09097598  | 714    | 720    | -0.72215043 | 1818511 | -1.38238101 | 2341764 | -1.1192132  |   | experimental |
| 3260 P14 | X | 1113    | 1120   | 0.65072189  | 1671   | 1680   | 1.63356333  | 2143873 | -0.67385799 | 2667025 | -0.51452957 |   | experimental |
| 3260 P15 | X | 792     | 800    | -0.24320069 | 1111   | 1120   | 0.25939697  | 2481396 | 0.06114379  | 2803451 | -0.26090398 |   | experimental |
| 3260 P16 | X | 549     | 560    | -0.91990844 | 746    | 760    | -0.63626504 | 1122112 | -2.89988716 | 1354334 | -2.95491672 |   | experimental |
| 3260 P17 | X | 1040    | 1040   | 0.42793761  | 982    | 1000   | -0.42793761 | 2052367 | -0.2062367  | 2538404 | -0.2062367  |   | experimental |
| 3260 P18 | X | 951     | 960    | 0.19589339  | 1111   | 1120   | 0.25939697  | 1125473 | -2.89158611 | 1410137 | -2.85117492 |   | experimental |
| 3260 P19 | X | 866     | 880    | -0.03712508 | 982    | 1000   | -0.05715207 | 2268624 | -0.40219705 | 2787232 | -0.29942192 |   | experimental |
| 3260 P20 | X | 3031    | 3040   | 5.99197892  | 3910   | 3920   | 7.1277749   | 1951597 | -1.09256765 | 2158865 | -1.45923562 |   | experimental |
| 3260 P21 | X | 1304    | 1320   | 1.18261975  | 1261   | 1280   | 0.62747724  | 2472064 | 0.04082198  | 2850072 | -0.17423201 |   | experimental |
| 3260 P22 | X | 1289    | 1320   | 1.14084767  | 1494   | 1520   | 1.19922886  | 2017751 | -0.94850807 | 2588053 | -0.66134421 |   | experimental |
| 3260 P23 | E | 4712    | 7800   | 10.673237   | 3934   | 6280   | 7.18666774  | 91974   | -5.14215662 | 100339  | -5.28618378 |   | empty        |
| 3260 A01 | N | 1058460 | 10660  | 2945.01448  | 801989 | 802840 | 1965.50869  | 193291  | -1.1165568  | 228373  | -1.12466214 |   | empty        |
| 3261 A01 | N | 838     | 840    | -0.92449044 | 1038   | 1040   | -0.99741324 | 1979257 | -0.84506796 | 1582012 | -1.6940338  |   | empty        |
| 3261 A02 | E | 274     | 280    | -1.70196035 | 592    | 600    | -2.18048004 | 80974   | -3.44811905 | 87488   | -3.99744822 |   | empty        |
| 3261 A03 | X | 874     | 880    | -0.8748647  | 1112   | 1120   | -0.79490631 | 1857898 | -1.01148344 | 1823786 | -1.32140298 |   | experimental |
| 3261 A04 | X | 1074    | 1080   | -0.59916615 | 1070   | 1080   | -0.90681804 | 2202625 | -0.538771   | 2270150 | -0.63345064 |   | experimental |
| 3261 A05 | X | 672     | 680    | -1.15332024 | 1351   | 1360   | -0.15807311 | 2417659 | -0.24390217 | 1491491 | -1.83354804 |   | experimental |
| 3261 A06 | X | 993     | 1000   | -0.71082406 | 1188   | 1200   | -0.59239938 | 2609730 | 0.01947828  | 2245878 | -0.67089593 |   | experimental |
| 3261 A07 | X | 1072    | 1080   | -0.60192314 | 1468   | 1480   | 0.15367878  | 2526740 | -0.09432309 | 2498311 | -0.28180066 |   | experimental |
| 3261 A08 | X | 791     | 800    | -0.9892796  | 1986   | 2000   | 1.53392337  | 2566354 | -0.04000176 | 2669482 | -0.01798573 |   | experimental |
| 3261 A09 | X | 1394    | 1400   | -0.15804847 | 2148   | 2160   | 1.96558288  | 1973955 | -0.85233841 | 2079276 | -0.92763255 |   | experimental |
| 3261 A10 | X | 750     | 760    | -1.0457978  | 1306   | 1320   | -0.27798073 | 2358437 | -0.32511129 | 2968150 | 0.44233219  |   | experimental |
| 3261 A11 | X | 1153    | 1160   | -0.49026522 | 1549   | 1560   | 0.36950853  | 1580327 | -1.39210714 | 2386933 | -0.45346046 |   | experimental |
| 3261 A12 | X | 792     | 800    | -0.98790111 | 1348   | 1360   | -0.166069   | 2513548 | -0.11241283 | 3271301 | 0.90955947  |   | experimental |
| 3261 A13 | X | 753     | 760    | -1.04166232 | 1309   | 1320   | -0.26998703 | 2257483 | -0.46354608 | 3068023 | 0.95626007  |   | experimental |
| 3261 A14 | X | 713     | 720    | -1.09680203 | 1068   | 1080   | -0.91214716 | 1784530 | -1.11209049 | 2582408 | -0.15218733 |   | experimental |
| 3261 A15 | X | 914     | 920    | -0.81972499 | 1127   | 1140   | 0.15900791  | 1650384 | -1.29604037 | 3009586 | 0.50619485  |   | experimental |
| 3261 A16 | X | 912     | 920    | -0.82241898 | 1109   | 1120   | -0.80290001 | 1934130 | -0.90694908 | 3305931 | 0.96293248  |   | experimental |
| 3261 A17 | X | 753     | 760    | -1.04310348 | 1110   | 1120   | -0.80023544 | 2147865 | -0.61386153 | 2283865 | -0.61231259 |   | experimental |
| 3261 A18 | X | 912     | 920    | -0.82241898 | 1230   | 1240   | -0.48048766 | 2100123 | -0.67932851 | 2099530 | -0.89641635 |   | experimental |
| 3261 A19 | X | 1192    | 1200   | -0.436504   | 1108   | 1120   | -0.80556457 | 2347712 | -0.33981811 | 2440156 | -0.37143125 |   | experimental |
| 3261 A20 | X | 1149    | 1160   | -0.49577919 | 1628   | 1640   | 0.58000916  | 2525374 | -0.09619624 | 3290845 | 0.93968139  |   | experimental |
| 3261 A21 | X | 1508    | 1520   | -0.00090029 | 1745   | 1760   | 0.89176324  | 2420362 | -0.24019563 | 3070664 | 0.60033047  |   | experimental |
| 3261 A22 | X | 1800    | 1800   | 0.37125275  | 1935   | 1940   | 1.39800257  | 2319455 | -0.37855998 | 2581742 | 0.35538144  |   | experimental |
| 3261 A23 | X | 2578    | 2680   | 1.40929778  | 3023   | 5160   | 0.92707713  | 87831   | -3.48571628 | 86931   | -3.99830669 |   | experimental |
| 3261 A24 | P | 735762  | 737280 | 1012.16292  | 730691 | 732240 | 1943.21566  | 1723153 | -1.19625469 | 1948330 | -1.12945126 |   | empty        |
| 3261 B01 | N | 555     | 560    | -1.31460389 | 712    | 720    | -1.86073225 | 2329691 | -0.3645297  | 2403432 | -0.42803161 |   | empty        |
| 3261 B02 | E | 314     | 320    | -1.64682064 | 591    | 600    | -2.1831446  | 88037   | -3.4384338  | 82971   | -4.00440998 |   | empty        |
| 3261 B03 | X | 873     | 880    | -0.87624319 | 1229   | 1240   | -0.48315222 | 2434605 | -0.22066469 | 2745722 | 0.09951811  |   | experimental |
| 3261 B04 | X | 550     | 560    | -1.32149635 | 908    | 920    | -1.33847554 | 2865783 | 0.3705908   | 3236980 | 0.85666227  | W | experimental |
| 3261 B05 | X | 512     | 520    | -1.37387908 | 826    | 840    | -1.55697186 | 1861359 | -1.00673749 | 1880175 | -1.23366194 |   | experimental |
| 3261 B06 | X | 1304    | 1320   | -0.82380948 | 1225   | 1240   | -0.28309898 | 2947245 | -0.34517405 | 2645811 | -0.04646833 |   | experimental |
| 3261 B07 | X | 791     | 800    | -0.9892796  | 1026   | 1040   | -1.02405889 | 2680828 | 0.11697256  | 2977999 | 0.17978017  |   | experimental |
| 3261 B08 | X | 590     | 600    | -0.26635664 | 1145   | 1160   | -0.70697567 | 2559625 | -0.049229   | 2823412 | 0.21925675  |   | experimental |
| 3261 B09 | X | 589     | 600    | -1.26773514 | 944    | 960    | -1.24255321 | 2720440 | 0.17129115  | 2435910 | -0.37797534 | W | experimental |
| 3261 B10 | X | 751     | 760    | -1.04441931 | 1026   | 1040   | -1.02405889 | 2840250 | 0.33582554  | 2777435 | 0.14839534  | W | experimental |
| 3261 B11 | X | 790     | 800    | -0.99065809 | 1026   | 1040   |             |         |             |         |             |   |              |

|          |   |        |        |            |             |        |            |              |            |             |         |             |  |              |                       |                                                                                                                  |
|----------|---|--------|--------|------------|-------------|--------|------------|--------------|------------|-------------|---------|-------------|--|--------------|-----------------------|------------------------------------------------------------------------------------------------------------------|
| 3261 B19 | X |        | 788    | 800        | -0.99341508 | 1306   | 1320       | -0.27798073  | 2824552    | 0.3140564   | 2575254 | -0.16321333 |  | experimental | Sigma-Aldrich D 8816  | N-(3,3-Diphenylpropyl)glycinamide; N2OC                                                                          |
| 3261 B20 | X |        | 1028   | 1040       | -0.66257682 | 1183   | 1200       | -0.60572221  | 2809177    | 0.29297319  | 2554265 | -0.19556233 |  | experimental | Sigma-Aldrich H-168   | R-(+)-7-Hydroxy-DPAT hydrobromide; R(+)-7-Hydroxy-L-Canavanine; L-alpha-Amino-gamma-(guanidinoxy)-n-Iodacetamide |
| 3261 B21 | X |        | 1105   | 1120       | -0.55643287 | 1662   | 1680       | -0.67060436  | 2709005    | 0.15561072  | 2582578 | -0.15192532 |  | experimental | Sigma-Aldrich C 1625  |                                                                                                                  |
| 3261 B22 | X |        | 1440   | 1440       | -0.12634313 | 1851   | 1880       | -1.17420712  | 2044834    | -0.7551444  | 2432379 | -0.3831092  |  | experimental | Sigma-Aldrich I 1149  |                                                                                                                  |
| 3261 B23 | X |        | 1708   | 3240       | 0.27479826  | 2476   | 4040       | 2.83956015   | 93635      | -3.43075745 | 89299   | -3.99589986 |  | empty        |                       |                                                                                                                  |
| 3261 B24 | P | 516079 | 519760 | 709.331496 | 526735      | 529960 | 1399.76167 | 2434386      | -0.220965  |             | 2274795 | -0.6262916  |  | empty        |                       |                                                                                                                  |
| 3261 C01 | N |        | 435    | 440        | -1.48002302 | 953    | 960        | -1.21857212  | 2403006    | -0.26399533 | 1917635 | -1.1767595  |  | empty        |                       |                                                                                                                  |
| 3261 C02 | E |        | 275    | 280        | -1.70058186 | 630    | 640        | -2.07922657  | 90397      | -3.43519761 | 96112   | -3.9841566  |  | empty        |                       |                                                                                                                  |
| 3261 C03 | X |        | 592    | 600        | -1.26359966 | 1109   | 1120       | -0.80290001  | 2187156    | -0.55998311 | 2268697 | -0.63569006 |  | experimental | Sigma-Aldrich C 9901  | N6-Cyclohexyladenosine; CHA                                                                                      |
| 3261 C04 | X |        | 872    | 880        | -0.87762169 | 947    | 960        | -1.23455951  | 2500353    | -0.13050669 | 2331455 | -0.53896516 |  | experimental | Sigma-Aldrich D 6035  | Disopyramide phosphate                                                                                           |
| 3261 C05 | X |        | 866    | 880        | -0.88589264 | 1145   | 1160       | -0.70697567  | 2208482    | -0.53073949 | 1182300 | -2.31008439 |  | experimental | Sigma-Aldrich C-106   | CGS-12066A maleate; 7-Trifluoromethyl-4(4-methyl-1-p-Daldetone; 7-Hydroxy-3-(4-hydroxyphenyl)-4H-1-benzop        |
| 3261 C06 | X |        | 2791   | 2800       | -1.76770592 | 2387   | 2400       | -1.620421388 | 3457760    | -1.18235306 | 2779081 | -0.07275327 |  | experimental | Sigma-Aldrich D 780   | Y-27632 dihydrochloride; (R)-(+)-trans-4-(1-Aminoethyl                                                           |
| 3261 C07 | X |        | 703    | 720        | -1.11058696 | 903    | 920        | -1.35180037  | 2984157    | 0.53291733  | 2851048 | 0.26185035  |  | experimental | Sigma-Aldrich Y 0503  | Imperatorin; 9-((3-Methyl-2-buten-1-yl)oxy)-7H-furo[3,                                                           |
| 3261 C08 | X |        | 1311   | 1320       | -0.27246337 | 1106   | 1120       | -0.8108937   | 3065703    | 0.64473859  | 3121432 | 0.67857595  |  | experimental | Sigma-Aldrich D 16659 | 2-Chloro-2-deoxy-D-glucose; 2-Chloro-DG                                                                          |
| 3261 C09 | X |        | 949    | 960        | -0.77147774 | 1227   | 1240       | -0.48848135  | 2721928    | 0.17333159  | 3364936 | 1.05387311  |  | experimental | Sigma-Aldrich C-203   | 3,4-Dihydroxyphenylacetic acid; DOPAC                                                                            |
| 3261 C10 | X |        | 906    | 920        | -0.83075293 | 1463   | 1480       | -0.14035595  | 2611126    | 0.02139257  | 2955974 | 0.42356661  |  | experimental | Sigma-Aldrich D 9128  | WB-4101 hydrochloride; 2-(2,6-Dimethoxyphenoxyethyl                                                              |
| 3261 C11 | X |        | 870    | 880        | -0.88037867 | 1266   | 1280       | -0.38456332  | 2450348    | -0.19907685 | 3262274 | 0.89564673  |  | experimental | Sigma-Aldrich D 0411  | 6,7-ADTN hydrobromide; (♣)-2-Amino-6,7-dihydroxy-1,                                                              |
| 3261 C12 | X |        | 951    | 960        | -0.76872076 | 1346   | 1360       | -0.17139813  | 2799745    | 0.28003941  | 2934598 | 0.39062063  |  | experimental | Sigma-Aldrich D-002   | 2,3-didehydro-3'-deoxythymidine; 2'-3'-Amhydrothymid                                                             |
| 3261 C13 | X |        | 670    | 680        | -1.15607722 | 1425   | 1440       | -0.03910249  | 2449659    | -0.20002165 | 2779081 | 0.15093232  |  | experimental | Sigma-Aldrich D 1413  | Mephetryl tetrazole; 1-[2-(4-Methoxyphenyl)ethyl]-5-(1-                                                          |
| 3261 C14 | X |        | 751    | 760        | -1.04441931 | 1146   | 1160       | -0.70431111  | 2740690    | 0.19059529  | 2873803 | 0.29692118  |  | experimental | Sigma-Aldrich M 7945  | Dextromethorphan hydrobromide monohydrate; d-3-Me-                                                               |
| 3261 C15 | X |        | 552    | 560        | -1.31873937 | 1186   | 1200       | -0.59772851  | 2076339    | -0.7119427  | 2648499 | -0.05032549 |  | experimental | Sigma-Aldrich D 2531  | 1,3-Dipropyl-7-methylxanthine                                                                                    |
| 3261 C16 | X |        | 508    | 520        | -1.37939305 | 1226   | 1240       | -0.49114592  | 2327947    | -0.36692219 | 2791258 | 0.16969984  |  | experimental | Sigma-Aldrich D-108   | Dequalinium chloride hydrobromide; 1,1'-Decamethylenebis(4-                                                      |
| 3261 C17 | X |        | 1031   | 1040       | -0.65844134 | 1307   | 1320       | -0.27531616  | 2070881    | -0.71942708 | 1986404 | -1.07077024 |  | experimental | Sigma-Aldrich D 3768  | Doxepin hydrochloride                                                                                            |
| 3261 C18 | X |        | 1109   | 1120       | -0.5509189  | 1146   | 1160       | -0.70431111  | 2976458    | 0.52259995  | 2927827 | 0.38018492  |  | experimental | Sigma-Aldrich A 8054  | 4-Diamino-6-pyrimidinone; DAHP; 2,4-Diamino-6-hydr                                                               |
| 3261 C19 | X |        | 948    | 960        | -0.77285624 | 1305   | 1320       | -0.28064529  | 2964445    | -0.12215294 | 2330106 | -0.54104429 |  | experimental | Sigma-Aldrich D 4526  | DM 235                                                                                                           |
| 3261 C20 | X |        | 907    | 916        | -0.82937464 | 1384   | 1390       | -0.70114467  | 3241385    | 0.88156536  | 2641385 | 0.18932128  |  | experimental | Sigma-Aldrich H-108-6 | Etoposide; Lastet                                                                                                |
| 3261 C21 | X |        | 1186   | 1200       | -0.44747496 | 1500   | 1520       | -0.23984485  | 2880098    | 0.38022475  | 2585279 | -0.2478444  |  | experimental | Sigma-Aldrich D 5689  |                                                                                                                  |
| 3261 C22 | X |        | 1818   | 1840       | 0.42643246  | 2336   | 2360       | 2.4652107    | 2872991    | 0.38047916  | 2514989 | -0.25609593 |  | experimental | Sigma-Aldrich E 1383  |                                                                                                                  |
| 3261 C23 | E |        | 1638   | 3200       | 0.17830376  | 1999   | 3120       | 1.56856272   | 90361      | -3.43524698 | 92351   | -3.98995319 |  | empty        |                       |                                                                                                                  |
| 3261 C24 | P | 528068 | 531040 | 725.858245 | 374987      | 377680 | 995.41928  | 2633249      | 0.05172909 |             | 2316319 | -0.56229331 |  | empty        |                       |                                                                                                                  |
| 3261 D01 | N |        | 795    | 800        | -0.98376563 | 1332   | 1040       | -1.0080715   | 2292531    | -0.41548595 | 2517835 | -0.25170957 |  | empty        |                       |                                                                                                                  |
| 3261 D02 | E |        | 274    | 280        | -1.70196035 | 790    | 800        | -1.6528962   | 219259     | -3.25849352 | 86801   | -3.99850705 |  | empty        |                       |                                                                                                                  |
| 3261 D03 | X |        | 832    | 840        | -0.9327614  | 1025   | 1040       | -1.02672345  | 2823888    | 0.31314588  | 3308313 | 0.9666037   |  | experimental | Sigma-Aldrich E 3149  | S-Ethylisothiourea hydrobromide; 2-Ethyl-2-thiopseudoi                                                           |
| 3261 D04 | X |        | 680    | 690        | -0.80822137 | 1107   | 1120       | -1.15607722  | 2449659    | -0.20002165 | 2779081 | 0.15093232  |  | experimental | Sigma-Aldrich T 22    | G-108                                                                                                            |
| 3261 D05 | X |        | 751    | 760        | -1.04441931 | 1108   | 1120       | -0.80556457  | 3075648    | 0.65837583  | 3399741 | 1.10751584  |  | experimental | Sigma-Aldrich E 3876  | N-Ethylmaleimide; NEM                                                                                            |
| 3261 D06 | X |        | 624    | 640        | -1.21948789 | 982    | 1000       | -1.14129974  | 2564519    | -0.04251803 | 3011401 | 0.50899219  |  | experimental | Sigma-Aldrich G-133   | GR-89696 fumarate; 4-[(3,4-Dichlorophenyl)acetyl]-3-                                                             |
| 3261 D07 | X |        | 994    | 1000       | -0.71358105 | 1186   | 1200       | -0.59772851  | 3263930    | 0.91656055  | 3255140 | 0.88465155  |  | experimental | Sigma-Aldrich N 3911  | NBI 27914; 5-Chloro-4-(N-(cyclopropyl)methyl-N-propyl                                                            |
| 3261 D08 | X |        | 788    | 800        | -0.99341508 | 1425   | 1440       | -0.03910249  | 2973599    | 0.5184395   | 2915953 | 0.36188429  |  | experimental | Sigma-Aldrich H 1384  | Hypotaurine; 2-Aminoethanesulfonic acid                                                                          |
| 3261 D09 | X |        | 826    | 840        | -0.94103235 | 1062   | 1080       | -0.92813455  | 2980042    | 0.52727457  | 2816072 | 0.20794408  |  | experimental | Sigma-Aldrich T 5648  | Tamoxifen; (Z)-1-(p-Dimethylaminoethoxyphenyl)-1,2-d                                                             |
| 3261 D10 | X |        | 2270   | 2280       | 1.04951119  | 2185   | 2200       | 2.06417178   | 2774456    | 0.24536146  | 2968988 | 0.44362374  |  | experimental | Sigma-Aldrich H 3132  | Ciprofloxacin hydrochloride; Cyclopropyl[4-[3-(1H-imidazol                                                       |
| 3261 D11 | X |        | 706    | 710        | -0.10549524 | 1105   | 1120       | -0.8108937   | 3011401    | 0.50899219  | 289397  | 0.22274544  |  | experimental | Sigma-Aldrich F 2802  | Fluvoxamine maleate; (♣)-2-Amino-1-[4-(trifluoromet                                                              |
| 3261 D12 | X |        | 711    | 720        | -1.09595902 | 1106   | 1120       | -0.81355827  | 1659541    | -1.28348367 | 1743044 | -1.44584546 |  | experimental | Sigma-Aldrich H 6036  | 1,3,5-Tris(4-hydroxyphenyl)-4-propyl-1H-pyrazole; PPT                                                            |
| 3261 D13 | X |        | 711    | 720        | -1.09595902 | 1105   | 1280       | -0.38722789  | 3207089    | 0.83861642  | 3171936 | 0.75641454  |  | experimental | Sigma-Aldrich F 6145  | Fensipride hydrochloride; 8-(2-Phenylethyl)-1-oxa-3,8-d                                                          |
| 3261 D14 | X |        | 990    | 1000       | -0.71495954 | 1265   | 1120       | -0.81355827  | 2537735    | -0.07924602 | 2843211 | 0.24977169  |  | experimental | Sigma-Aldrich H 8250  | (♣)-8-Hydroxy-DPAT hydrobromide; (♣)-8-Hydroxy-dip                                                               |
| 3261 D15 | X |        | 1109   | 1120       | -0.5509189  | 1347   | 1360       | -0.16873357  | 3188939    | 0.81372794  | 3175541 | 0.76197069  |  | experimental | Sigma-Aldrich F 6889  | Famotidine; N-(Aminosulfonyl)-3-[[2-(diaminomethylen                                                             |
| 3261 D16 | X |        | 1710   | 1720       | -0.27755524 | 1105   | 1120       | -0.81355827  | 2782566    | 0.25648243  | 2731743 | 0.07797317  |  | experimental | Sigma-Aldrich H 9003  | Hydroquinone; 1,4-Benzenediol                                                                                    |
| 3261 D17 | X |        | 827    | 840        | -0.93965386 | 1106   | 1120       | -0.8108937   | 2911186    | 0.43285467  | 2809145 | 0.19276793  |  | experimental | Sigma-Aldrich F 9552  | Formoterol; (R*,R*)-N-[2-hydroxy-5-[1-hydroxy-2-[[2-(                                                            |
| 3261 D18 | X |        | 948    | 960        | -0.77285624 | 985    | 1000       | -1.13330505  | 2535945    | 0.81700529  | 2959376 | 0.42227454  |  | experimental | Sigma-Aldrich H-108   | Hemicholinium-3                                                                                                  |
| 3261 D19 | X |        | 1148   | 1160       | -0.49715769 | 1266   | 1280       | -0.38456332  | 2091128    | 0.60960303  | 3004522 | 0.49840082  |  | experimental | Sigma-Aldrich D 0639  | Doxylamine succinate; Glycerol                                                                                   |
| 3261 D20 | X |        | 1107   | 1120       | -0.55367589 | 1303   | 1320       | -0.28597442  | 2840065    | 0.33532886  | 3138579 | 0.70500352  |  | experimental | Sigma-Aldrich S0323   | Sematiide monohydrochloride monohydrate; N-[2-(Diet                                                              |
| 3261 D21 | X |        | 945    | 960        | -0.77699172 | 1543   | 1560       | 0.35352114   | 3074049    | 0.65518318  | 2671586 | -0.01474297 |  | experimental | Sigma-Aldrich B 7273  | Bezafibrate                                                                                                      |
| 3261 D22 | X |        | 1657   | 1680       | 0.20449513  | 1694   | 1720       | 0.75587044   | 2546695    | -0.06695948 | 2700175 | 0.02931943  |  | experimental | Sigma-Aldrich I 1392  | HA-100; 1-(5-Isouquinolinesulfonyl)piperazine hydrochlor                                                         |
| 3261 D23 | E |        | 1838   | 3320       | 0.45400232  | 2105   | 3280       | 1.85100659   | 94694      | -3.42930528 | 91745   | -3.99088718 |  | empty        |                       |                                                                                                                  |
| 3261 D24 | P | 500245 | 503400 | 687.504441 | 394712      | 397200 | 1047.97782 | 2953924      | 0.49145984 |             | 2621268 | -0.09172463 |  | empty        |                       |                                                                                                                  |
| 3261 E01 | N |        | 875    | 880        | -0.87348621 | 1152   | 1160       | -0.68832372  | 2724732    | 0.17717662  | 2265386 | -0.64079309 |  | empty        |                       |                                                                                                                  |
| 3261 E02 | E |        | 232    | 240        | -1.75985705 | 666    | 680        | -1.98300224  | 97818      | -3.42502145 | 96403   | -3.9837081  |  | empty        |                       |                                                                                                                  |
| 3261 E03 | X |        | 1273   | 1280       | -0.32484609 | 2268   | 2280       | -2.8533066   | 3315480    | 0.98724932  | 4239196 | 2.40131423  |  | experimental | Sigma-Aldrich C 9911  | (S)-(+)-Camptothecin                                                                                             |
| 3261 E04 | X |        | 870    | 880        | -0.88037867 | 1184   | 1200       | -0.60305764  | 2689442    | 0.12878464  | 2490310 | -0.29413209 |  | experimental | Sigma-Aldrich D 6140  | Demeclocycline hydrochloride; 7-chloro-6-demethyltetra                                                           |
| 3261 E05 | X |        | 790    | 800        | -0.99065809 | 907    | 920        | -1.34114211  | 2780151    | 0.25317082  | 1434870 | -1.92081437 |  | experimental | Sigma-Aldrich C-108   | 2-Cyclooctyl-2-hydroxyethylamine hydrochloride; CONH                                                             |
| 3261 E06 | X |        | 1031   | 1040       | -0.65844134 | 1307   | 1360       | -0.16873357  | 2343610    | -0.34544305 | 1971275 | -1.09408746 |  | experimental | Sigma-Aldrich I1493   | Clinidine; 1,4-Dihydro-2,6-dimethyl-4-(3-nitrophenyl)-                                                           |
| 3261 E07 | X |        | 989    | 1000       | -0.71633803 | 1505   | 1520       | 0.25226768   | 3316890    | 0.9891828   | 3543052 | 1.32908549  |  | experimental | Sigma-Aldrich C-144   | 1-(m-Chlorophenyl)-biguanide hydrochloride; m-CPBG                                                               |
| 3261 E08 | X |        | 991    | 1000       | -0.71358105 | 1624   | 1640       | 0.5693509    | 3223694    | 0.86138629  | 3404215 | 1.11441133  |  | experimental | Sigma-Aldrich D 8296  | 3-deazaadenosine; 4-Amino-1-(beta-D-ribofuranosyl)-11                                                            |
| 3261 E09 | X |        | 750    | 760        | -1.0457978  | 1343   | 1440       | -0.03377339  | 2784356    | 0.25893699  | 3329434 | 0.99915515  |  | experimental | Sigma-Aldrich T0202   | Tocainide hydrochloride; 2'-5-Methoxy-1-[4-(trifluoromet                                                         |
| 3261 E10 | X |        | 827    | 840        | -0.93965386 | 1343   | 1360       | -0.17939183  | 2518662    | -0.10540018 | 2786630 | 0.1625656   |  | experimental | Sigma-Aldrich D 9175  | Dantrolene sodium; 1-[(5-(p-Nitrophenyl)furfurylidene)]                                                          |
| 3261 E11 | X |        | 785    | 800        | -0.99755056 | 1343   | 1360       | -0.17939183  | 2669808    | 0.10186121  | 2789256 | 0.16661429  |  | experimental | Sigma-Aldrich D 0540  | DNQX; 6,7-Dinitroquinoxaline-2,3-dione                                                                           |
| 3261 E12 | X |        | 872    | 880        | -0.87762169 | 1265   | 1280       | -0.38722789  | 2898514    | 0.41547799  | 2975349 | 0.4         |  |              |                       |                                                                                                                  |





|          |   |        |        |              |        |        |             |         |             |         |             |              |                      |                                                             |
|----------|---|--------|--------|--------------|--------|--------|-------------|---------|-------------|---------|-------------|--------------|----------------------|-------------------------------------------------------------|
| 3261 J07 | X | 1622   | 1640   | 0.15624788   | 2022   | 2040   | 1.62984771  | 2100235 | -0.67917493 | 2879381 | 0.3055182   | experimental | Sigma-Aldrich P0111  | Phenserine; (-)-N-Phenylcarbamoyleseroline                  |
| 3261 J08 | X | 2343   | 2360   | 1.15014116   | 2542   | 2560   | 3.01542144  | 2667637 | 0.09888419  | 3106545 | 0.65563157  | experimental | Sigma-Aldrich H 1877 | 4-Imidazolemethanol hydrochloride; 4-(Hydroxymethyl)        |
| 3261 J09 | X | 1460   | 1480   | -0.06706795  | 1222   | 1240   | -0.50180418 | 2645928 | 0.06911537  | 3167350 | 0.74934643  | experimental | Sigma-Aldrich F 0778 | Felbamate; 2-Phenyl-1,3-propanediol dicarbamate             |
| 3261 J10 | X | 1505   | 1520   | 0.10524365   | 947    | 960    | -1.23455951 | 3005502 | 0.562187    | 3348817 | 1.02803093  | experimental | Sigma-Aldrich L 4408 | Lithium Chloride                                            |
| 3261 J11 | X | 1504   | 1520   | -0.00641426  | 1107   | 1120   | -0.80822914 | 1469238 | -1.5443971  | 1903961 | -1.19783437 | experimental | Sigma-Aldrich F 4303 | Fidusoxin hydrochloride;                                    |
| 3261 J12 | X | 1464   | 1480   | -0.06155397  | 1226   | 1280   | -0.38456332 | 2876268 | 0.3849728   | 3295094 | 0.9462301   | experimental | Sigma-Aldrich H 7258 | Harmane; Aribine                                            |
| 3261 J13 | X | 1502   | 1520   | -0.00917125  | 1265   | 1240   | -0.49381048 | 2612051 | 0.02266099  | 3000435 | 0.492091    | experimental | Sigma-Aldrich F 6513 | Fusaric acid; 5-Butyl-2-pyridinecarboxylic acid             |
| 3261 J14 | X | 1504   | 1520   | -0.00641426  | 1066   | 1080   | -0.91747629 | 2836407 | 0.33031276  | 3374990 | 1.0693867   | experimental | Sigma-Aldrich H 8645 | (+)-Hydrastine; (+)-beta-Hydrastine 1(5S),9(R)              |
| 3261 J15 | X | 1662   | 1680   | 0.21138759   | 1346   | 1360   | -0.17139813 | 1974389 | -0.85174328 | 2468131 | -0.32831517 | experimental | Sigma-Aldrich F 8257 | Flunarizine dihydrochloride; 1-bis(4-fluorophenyl)meth      |
| 3261 J16 | X | 1664   | 1680   | 0.21414458   | 1146   | 1160   | -0.70431111 | 3173872 | 0.79306707  | 3291992 | 0.94144919  | experimental | Sigma-Aldrich H 9523 | Serotonin hydrochloride; 5-HT hydrochloride                 |
| 3261 J17 | X | 1463   | 1480   | -0.06293247  | 1287   | 1280   | -0.38189876 | 2026323 | -0.78052795 | 2170251 | -0.78741859 | experimental | Sigma-Aldrich F 1194 | cis-(2)-Flupenthixol dihydrochloride; (Z)-4-[3-[2-(Triflu   |
| 3261 J18 | X | 1263   | 1280   | -0.33863102  | 1186   | 1200   | -0.59772851 | 2172228 | -0.58045337 | 2658645 | -0.1028351  | experimental | Sigma-Aldrich H 1127 | Hexyldro-silica-difenidol dihydrochloride, p-fluoro analog; |
| 3261 J19 | X | 1464   | 1480   | -0.06155397  | 1343   | 1360   | -0.17939183 | 3292329 | 0.95550314  | 3066084 | 0.93237161  | experimental | Sigma-Aldrich G 2128 | L-Glutamic acid hydrochloride; (S(+)-1-Amino-propane-1,     |
| 3261 J20 | X | 1501   | 1520   | -0.101054974 | 1463   | 1480   | 0.14035595  | 2309774 | -0.39184121 | 3111135 | 0.66270584  | experimental | Sigma-Aldrich I 0375 | Imidazole-4-acetic acid hydrochloride; 14AA                 |
| 3261 J21 | X | 1299   | 1320   | -0.28900528  | 1300   | 1320   | -0.29396812 | 1101303 | -2.0489765  | 1051005 | -2.51244099 | experimental | Sigma-Aldrich G 6793 | GW7647; 2-(4-(2-(1-Cyclohexanebutyl)-3-cyclohexylure        |
| 3261 J22 | X | 1649   | 1680   | 0.19346718   | 1603   | 1640   | 0.54004068  | 2974133 | 0.51917176  | 2936695 | 0.39385261  | experimental | Sigma-Aldrich M 1195 | Metolazone; 7-Chloro-1,2,3,4-tetrahydro-2-methyl-3-(2       |
| 3261 J23 | E | 2337   | 3840   | 1.1418702    | 2489   | 3800   | 2.8741995   | 92212   | -3.43270076 | 90472   | -3.99284917 | empty        |                      |                                                             |
| 3261 J24 | P | 509662 | 509840 | 696.763777   | 440733 | 443480 | 1170.60376  | 3210534 | 0.84336785  | 2980600 | 0.46068831  | empty        |                      |                                                             |
| 3261 K01 | N | 1507   | 1520   | -0.00227879  | 1071   | 1080   | -0.90415347 | 2479717 | -0.15800414 | 2576335 | -0.16154725 | empty        |                      |                                                             |
| 3261 K02 | E | 863    | 880    | -0.89002812  | 668    | 680    | -1.97797311 | 90917   | -3.43448455 | 95895   | -3.98449105 | empty        |                      |                                                             |
| 3261 K03 | X | 1659   | 1680   | 0.20725211   | 864    | 880    | -1.4557184  | 2125897 | -0.6439855  | 2062564 | -0.95338969 | experimental | Sigma-Aldrich P2014  | CP-91149                                                    |
| 3261 K04 | X | 1458   | 1480   | -0.06982493  | 946    | 960    | -1.23722408 | 2645712 | 0.06688198  | 2586535 | -0.14582664 | experimental | Sigma-Aldrich D 6908 | DL-erythro-Dihydrospingosine; DL-Sphinganine                |
| 3261 K05 | X | 1742   | 1760   | 0.32166701   | 1226   | 1240   | -0.49114592 | 2910759 | 0.43226914  | 1213105 | -2.26260661 | experimental | Sigma-Aldrich C 1255 | (-)-CGP-12177A hydrochloride; 4-[4-[[[1,1-Dimethyleth       |
| 3261 K06 | X | 1420   | 1440   | -0.12220766  | 1146   | 1160   | -0.70431111 | 3284208 | 0.94436709  | 3494395 | 1.25340001  | experimental | Sigma-Aldrich D 7938 | D80-83; 3-(6-Chloro-3-pyridazinyl)-3,8-diazabicyclo[3.1.    |
| 3261 K07 | X | 1538   | 1560   | 0.04045449   | 1261   | 1280   | -0.39788615 | 2431479 | -0.22495127 | 3072685 | 0.60344531  | experimental | Sigma-Aldrich C 191  | Capsazepine; N-[2-(4-Chlorophenyl)ethyl]-1,3,4,5-tetra      |
| 3261 K08 | X | 1738   | 1760   | 0.31615304   | 1226   | 1280   | -0.50180418 | 3055395 | 0.6167670   | 3243508 | 0.81740406  | experimental | Sigma-Aldrich H 8555 | N,N-Diethyl-2-(4-fluorophenyl)indole-3-acetamide; FGII      |
| 3261 K09 | X | 1720   | 1760   | 0.49114592   | 1126   | 1240   | -0.49114592 | 2830236 | 0.32185068  | 3298233 | 0.16122166  | experimental | Sigma-Aldrich C 237  | 5,1'S,2'S-carboxycyclopropylglycine; L-CGCS-1               |
| 3261 K10 | X | 1461   | 1480   | -0.06568945  | 1206   | 1120   | -0.8108937  | 2888617 | 0.40190657  | 2904260 | 0.34386261  | experimental | Sigma-Aldrich D 9628 | L-3,4-Dihydroxyphenylalanine; L-DOPA; Levodopa              |
| 3261 K11 | X | 1381   | 1400   | -0.17596887  | 1187   | 1200   | -0.59506395 | 2671677 | 0.1044241   | 2526007 | -0.23911459 | experimental | Sigma-Aldrich D 1064 | Dihydrokainic acid; 2-Carboxy-4-isopropyl-3-pyrrolidine     |
| 3261 K12 | X | 1500   | 1520   | -0.01192824  | 904    | 920    | -1.3491358  | 2468976 | -0.7135329  | 2272037 | -0.63054233 | experimental | Sigma-Aldrich D-030  | RC(-)-2,10,11-Trihydroxy-N-propylnoraporphine hydrobro      |
| 3261 K13 | X | 2300   | 2320   | 0.190806597  | 1506   | 1520   | 0.25493224  | 2656525 | 0.08364668  | 2341286 | -0.52381327 | experimental | Sigma-Aldrich K3519  | KRM-III                                                     |
| 3261 K14 | X | 1458   | 1480   | -0.06982493  | 946    | 960    | -1.23722408 | 2128067 | -0.64100985 | 1765754 | -1.41084399 | experimental | Sigma-Aldrich D 1054 | RC(+)-SCH-23390 hydrochloride; R(+)-7-Chloro-8-hydro:       |
| 3261 K15 | X | 1860   | 1880   | 0.48432916   | 1026   | 1040   | -1.02405889 | 2428725 | -0.22872774 | 1871430 | -1.24797232 | experimental | Sigma-Aldrich D 3630 | Diphenhydramine hydrochloride                               |
| 3261 K16 | X | 1560   | 1580   | 0.18329508   | 847    | 860    | -1.34573079 | 2482507 | 0.38984413  | 2575903 | 0.79996579  | experimental | Sigma-Aldrich H 0627 | R(+)-7-Hydroxy-DPAT hydrobromide; (S)-DIOXA                 |
| 3261 K17 | X | 1580   | 1600   | 0.09835118   | 947    | 960    | -1.23455951 | 2791648 | 0.26893627  | 1244869 | -2.21365078 | experimental | Sigma-Aldrich D 4007 | 5,5-Diphenylhydantoin; Phenytoin                            |
| 3261 K18 | X | 1821   | 1840   | 0.43056794   | 984    | 1000   | -1.13597061 | 3348966 | 1.03316754  | 1579424 | -1.69802252 | experimental | Sigma-Aldrich D14204 | 1,10-Diaminododecane; DA10; Decamethylenediamine            |
| 3261 K19 | X | 1778   | 1800   | 0.37129275   | 1743   | 1760   | 0.88643411  | 3352448 | 1.03794228  | 3534562 | 1.31530684  | experimental | Sigma-Aldrich G 7795 | Ganaxalone; 3a-Hydroxy-3beta-Hydroxy-5a-pregnan-20-         |
| 3261 K20 | X | 2096   | 2120   | 0.80965345   | 2069   | 1880   | -1.1981882  | 3197563 | 0.85553474  | 4279757 | 2.46382831  | experimental | Sigma-Aldrich E 0137 | Vanillic acid diethylamide; Ethivan                         |
| 3261 K21 | X | 2454   | 2480   | 1.30315385   | 1850   | 2080   | 1.72843661  | 2999103 | 0.52531227  | 3532649 | 1.31235845  | experimental | Sigma-Aldrich C0494  | Cambinol; NSC-1125476; Tetrahydro-5-[(2-hydroxy-1-n         |
| 3261 K22 | X | 2969   | 3000   | 2.01307762   | 2373   | 2400   | 2.56510997  | 2109745 | -0.66613419 | 2177750 | -0.77586086 | experimental | Sigma-Aldrich E 2375 | Emetine dihydrochloride hydrate                             |
| 3261 K23 | E | 4040   | 4150   | 35054494     | 3250   | 3280   | 1.65053405  | 94111   | -4.3010473  | 90904   | -3.79919644 | empty        |                      |                                                             |
| 3261 K24 | P | 446523 | 449440 | 613.449054   | 445337 | 448560 | 1183.40433  | 2799913 | 0.28026978  | 2974194 | 0.65164742  | empty        |                      |                                                             |
| 3261 L01 | N | 1824   | 1840   | 0.43470342   | 1390   | 1400   | -0.05415728 | 4018472 | 1.95123841  | 1280655 | -0.77138357 | empty        |                      |                                                             |
| 3261 L02 | E | 1698   | 1720   | 0.26101333   | 1184   | 1200   | -0.60305764 | 86233   | -3.44090756 | 88491   | -3.99590236 | empty        |                      |                                                             |
| 3261 L03 | X | 3216   | 3240   | 2.35356533   | 2586   | 2600   | 3.13266229  | 99635   | -3.42252986 | 2872569 | 0.2950193   | experimental | Sigma-Aldrich E 3380 | Ellipticine; 5,11-Dimethyl-6H-pyrrolo[4,3-b]carbazole       |
| 3261 L04 | X | 2655   | 2680   | 1.58023009   | 1702   | 1720   | 0.77718695  | 3745944 | 1.577553    | 2327666 | -0.54480409 | experimental | Sigma-Aldrich 34829  | JFD00244; 1,4-Bis[(p-hydroxyphenethyl)amino]-anthrac        |
| 3261 L05 | X | 1693   | 1720   | 0.25412087   | 1344   | 1360   | -0.17672726 | 93129   | -3.43145131 | 3250917 | 0.87814291  | experimental | Sigma-Aldrich E 7138 | Ethosuximide; 2-Ethyl-2-methylsuccinimide                   |
| 3261 L06 | X | 1896   | 1920   | 0.53895499   | 1261   | 1280   | -0.39788615 | 3446332 | 1.16668223  | 3126780 | 0.79996579  | experimental | Sigma-Aldrich H 0627 | 6-Hydroxydopamine; 3-(N-Acetylaminoethyl)-6-hydroxy         |
| 3261 L07 | X | 2766   | 2780   | 0.25639588   | 2264   | 2280   | -0.27487591 | 5197676 | 0.36614089  | 3232229 | 0.84934029  | experimental | Sigma-Aldrich E-006  | N-Methyl-beta-carboline-3-carboxamide; FC7; F142            |
| 3261 L08 | X | 1935   | 1960   | 0.58771611   | 1221   | 1240   | -0.50446874 | 94616   | -3.42941224 | 3370587 | 1.06258264  | experimental | Sigma-Aldrich H 2138 | Hexamethonium iodide; N,N,N,N,N'-Hexamethyl-                |
| 3261 L09 | X | 2217   | 2240   | 0.97645107   | 1224   | 1240   | -0.49647505 | 5007559 | 3.30753986  | 2867256 | 0.28683071  | experimental | Sigma-Aldrich F 0881 | Fusaric acid sodium; Fusidin                                |
| 3261 L10 | X | 1777   | 1800   | 0.36991426   | 1545   | 1560   | 0.35885027  | 87361   | -3.43936708 | 3066459 | 0.59384957  | experimental | Sigma-Aldrich H 4759 | Hydrochlorothiazide; 6-Chloro-3,4-dihydro-2H-1,2,4-ber      |
| 3261 L11 | X | 1899   | 1920   | 0.53809037   | 1384   | 1400   | -0.07014467 | 2738520 | 0.19608364  | 3139062 | 0.70574794  | experimental | Sigma-Aldrich F 4381 | Furosemide                                                  |
| 3261 L12 | X | 1776   | 1800   | 0.36853576   | 1345   | 1360   | -0.1740627  | 3402096 | 1.1060229   | 2467755 | -0.32889467 | experimental | Sigma-Aldrich J 4137 | 3S-K; O2-(2,4-Dinitrophenyl)-1-[(4-ethoxycarbonyl)pipe      |
| 3261 L13 | X | 2335   | 2360   | 1.13911322   | 1704   | 1720   | 0.78251608  | 3453052 | 1.17589714  | 2848830 | 0.25843189  | experimental | Sigma-Aldrich F 6627 | 5-Fluorouracil; 5-FU                                        |
| 3261 L14 | X | 2016   | 2040   | 0.69937403   | 1384   | 1360   | -0.17672726 | 398055  | -0.10331663 | 2675003 | -0.00947656 | experimental | Sigma-Aldrich H 8653 | (-)-7-Hydroxy-DPAT hydrobromide; (S)-7-OH-DPAT HB           |
| 3261 L15 | X | 2137   | 2160   | 0.86617165   | 1546   | 1560   | 0.36151484  | 2525797 | -0.09561619 | 3031435 | 0.53986932  | experimental | Sigma-Aldrich F 8791 | 5-Fluoro-5'-deoxyuridine; 5'FdUrd                           |
| 3261 L16 | X | 2057   | 2080   | 0.75589223   | 1345   | 1360   | -0.1740627  | 3842326 | 1.70969537  | 3293487 | 0.94375333  | experimental | Sigma-Aldrich L 2167 | L-165,041; 4-{3-[4-Acetyl-3-hydroxy-2-propylphenoxy]}-      |
| 3261 L17 | X | 1897   | 1920   | 0.53533339   | 1505   | 1520   | 0.25226768  | 1880997 | -0.97980856 | 3469821 | 1.21552657  | experimental | Sigma-Aldrich F-124  | Furafylline; 3-(2-Furanyl-methyl)-3,7-dihydro-1,8-dimet     |
| 3261 L18 | X | 1896   | 1920   | 0.5339549    | 1464   | 1480   | 0.14302052  | 3217370 | 0.8527144   | 2872049 | 0.29421785  | experimental | Sigma-Aldrich H-128  | Histamine, R(-)-alpha-methyl-, dihydrochloride; R(-)-al-    |
| 3261 L19 | X | 2294   | 2320   | 1.08259501   | 1540   | 1560   | 0.34552745  | 2535169 | -0.08276469 | 3089205 | 0.62890639  | experimental | Sigma-Aldrich G 2536 | Ganciclovir                                                 |
| 3261 L20 | X | 2332   | 2360   | 1.13497774   | 1500   | 1520   | 0.23894485  | 3126465 | 0.72805946  | 2934932 | 0.39113541  | experimental | Sigma-Aldrich C 3118 | CPWG; 5-(4-(4-Chlorobenzyloxy)-1-piperazinyl)-8-nitroqui    |
| 3261 L21 | X | 2652   | 2680   | 1.57609542   | 1384   | 1720   | 0.76386413  | 2209798 | -0.5289349  | 3274870 | 0.91506014  | experimental | Sigma-Aldrich G 7748 | alpha-Guanidinoglutaric acid; GGA                           |
| 3261 L22 | X | 2322   | 2360   | 1.12119281   | 2091   | 2120   | 1.81370268  | 2696155 | 0.13798995  | 2336680 | -0.53183694 | experimental | Sigma-Aldrich G 0719 | GR 55562 dihydrochloride; 3-(3-(Dimethylamino)propyl        |
| 3261 L23 | E | 3020   | 4480   | 2.08338075   | 2723   | 4080   | 3.49770767  | 94865   | -3.42907079 | 90385   | -3.99298326 | empty        |                      |                                                             |
| 3261 L24 | P | 490820 | 493480 | 674.512147   | 463558 | 459120 | 1212.23759  | 2491479 | -0.1426753  | 3034867 | 0.54515884  | empty        |                      |                                                             |
| 3261 M01 | N | 2143   | 2160   | 0.87444261   | 1229   | 1240   | -0.48315222 | 3052441 | 0.62655286  | 2488363 | -0.29713288 | empty        |                      |                                                             |
| 3261 M02 | E | 1737   | 1760   | 0.31477455   | 946    | 960    | -1.23722408 | 88436   | -3.43788666 | 97432   | -3.98212217 | empty        |                      |                                                             |
| 3261 M03 | X | 2173   | 2200   | 0.91579739   |        |        |             |         |             |         |             |              |                      |                                                             |

|          |   |        |        |            |        |        |              |         |             |          |             |              |                      |                                                          |
|----------|---|--------|--------|------------|--------|--------|--------------|---------|-------------|----------|-------------|--------------|----------------------|----------------------------------------------------------|
| 3261 N01 | N | 2340   | 2360   | 1.14600568 | 1470   | 1480   | 0.15900791   | 86553   | -3.44046876 | 1990275  | -1.06480411 | empty        |                      |                                                          |
| 3261 N02 | E | 1937   | 1960   | 0.5904731  | 1105   | 1120   | -0.81355827  | 84144   | -3.44377214 | 137667   | -3.92011053 | empty        |                      |                                                          |
| 3261 N03 | X | 2216   | 2240   | 0.97507258 | 1745   | 1760   | 0.89176324   | 3780607 | 1.6250622   | 3207488  | 0.81120857  | experimental | Sigma-Aldrich R0158  | RepSox                                                   |
| 3261 N04 | X | 2084   | 2080   | 0.75175675 | 1301   | 1320   | -0.29130355  | 87312   | -3.4394787  | 2449909  | -0.35639567 | experimental | Sigma-Aldrich G-117  | Glipizide                                                |
| 3261 N05 | X | 2092   | 2120   | 0.80413948 | 1943   | 1960   | 0.41934709   | 4163800 | 2.15052176  | 2612705  | -0.10529249 | experimental | Sigma-Aldrich J4774  | JK401; 1-[2-Methoxy-4-(methylthio)benzoyl]-4-benzylpi    |
| 3261 N06 | X | 2094   | 2120   | 0.80689646 | 1741   | 1760   | 0.88110498   | 84972   | -3.44263673 | 2652514  | -0.04413742 | experimental | Sigma-Aldrich H 0879 | Hexamethonium bromide; Hexane-1,6-bis(trimethylamn       |
| 3261 N07 | X | 2094   | 2120   | 0.80689646 | 1342   | 1360   | -0.18205639  | 4716661 | 2.9086413   | 3256944  | 1.04155556  | experimental | Sigma-Aldrich D7443  | DPO-1; Diphenyl phosphine oxide-1                        |
| 3261 N08 | X | 2291   | 2320   | 1.07845953 | 1459   | 1480   | 0.12969769   | 88361   | -3.43798951 | 2332453  | -0.53742701 | experimental | Sigma-Aldrich B 5437 | Bendamustine hydrochloride; Treadna, 1H-Benzimidaz       |
| 3261 N09 | X | 2522   | 2560   | 1.41067629 | 1622   | 1640   | 0.56402177   | 2312333 | -0.38833214 | 3152967  | 0.72717883  | experimental | Sigma-Aldrich F 1016 | Fenoterol hydrobromide; 2-(3,5-Dihydroxyphenyl)-2-hy     |
| 3261 N10 | X | 2132   | 2160   | 0.85927919 | 1301   | 1320   | -0.29130355  | 2676407 | 0.11091019  | 2260191  | -0.73229196 | experimental | Sigma-Aldrich S 8817 | SB 218795; (-)-(R)-N-(alpha-methoxycarbonylbenzyl)-2     |
| 3261 N11 | X | 2334   | 2360   | 1.13773472 | 1543   | 1560   | 0.35352114   | 2426239 | -0.2321367  | 3155005  | 0.73031987  | experimental | Sigma-Aldrich F 4646 | p-Fluoro-L-phenylalanine; 4-Fluoro-L-phenylalanine       |
| 3261 N12 | X | 2093   | 2120   | 0.80591794 | 1580   | 1600   | 0.45211004   | 1295222 | -1.78306195 | 173257   | -1.46071377 | experimental | Sigma-Aldrich H 7779 | Retinoic acid p-hydroxyamide; N-(4-Hydroxyphenyl)eth     |
| 3261 N13 | X | 2373   | 2400   | 1.19149594 | 3022   | 3040   | 0.429441257  | 2324697 | -0.3713778  | 3217572  | 0.826575039 | experimental | Sigma-Aldrich E 7906 | Esomeprazole magnesium dihydrate; (S)-Omeprazole m       |
| 3261 N14 | X | 1894   | 1920   | 0.53119791 | 1778   | 1800   | 0.44678091   | 3506657 | 1.24940386  | 2278543  | -0.62051505 | experimental | Sigma-Aldrich H 8759 | MHPG sulfate potassium; 4-Hydroxy-3-methoxyphenylgl      |
| 3261 N15 | X | 2175   | 2200   | 0.91855437 | 1903   | 1920   | 1.31276449   | 1820986 | -1.06209961 | 3382012  | 1.08019126  | experimental | Sigma-Aldrich F 8927 | Flupirtine maleate; 2-amino-6-[[[4-fluorophenyl]methyl   |
| 3261 N16 | X | 2452   | 2480   | 1.30039687 | 1501   | 1520   | 0.24160942   | 2700783 | 0.14433617  | 2608311  | -0.11226469 | experimental | Sigma-Aldrich H 9772 | 5-Hydroxy-L-tryptophan; S(+)-1-alpha-Amino-5-hydrox      |
| 3261 N17 | X | 2652   | 2680   | 1.57609542 | 1904   | 1920   | 1.31542906   | 2528582 | -0.09179722 | 3516192  | 1.28699343  | experimental | Sigma-Aldrich F-131  | FPL 64176; 2,5-Dimethyl-4-[2-(phenylmethyl)benzoyl]-     |
| 3261 N18 | X | 2453   | 2480   | 1.30177536 | 1617   | 1640   | 0.55069894   | 3013502 | 0.57315713  | 2197180  | -0.74591465 | experimental | Sigma-Aldrich H-135  | 5-Hydroxydecanoic acid sodium                            |
| 3261 N19 | X | 2292   | 2320   | 1.07983803 | 2061   | 2080   | 1.73376574   | 2120336 | -0.05161111 | 3333455  | 1.00535346  | experimental | Sigma-Aldrich G 3126 | L-Glutamine; S(+)-L-Glutamic acid 5-amide                |
| 3261 N20 | X | 2291   | 2320   | 1.07845953 | 1458   | 1480   | 0.12703313   | 1291872 | -1.78765569 | 906281   | -2.73549485 | experimental | Sigma-Aldrich N 1786 | NSC 95397; 2,3-bis[(2-Hydroxyethyl)thio]-1,4-naphtho     |
| 3261 N21 | X | 2528   | 2560   | 1.40516232 | 1777   | 1800   | 0.97702932   | 2114726 | -0.65930391 | 3174937  | 0.76103979  | experimental | Sigma-Aldrich G 8134 | Gallamine triethiodide                                   |
| 3261 N22 | X | 3039   | 3080   | 2.10957212 | 2130   | 2160   | 1.91762071   | 3107387 | 0.70189485  | 2184854  | -0.76491192 | experimental | Sigma-Aldrich I 2279 | IMID-4F hydrochloride; 2-[N-(2,6-dichlorophenyl)-N-(4    |
| 3261 N23 | E | 3949   | 3949   | 3.36400052 | 2873   | 4520   | 3.8973924    | 86682   | -3.44029186 | 84287    | -4.00238171 | empty        |                      |                                                          |
| 3261 N24 | P | 540337 | 543640 | 742.770973 | 554684 | 558080 | 1474.23359   | 2231472 | -0.49921408 | 3161454  | 0.74025929  | empty        |                      |                                                          |
| 3261 O01 | N | 2621   | 2640   | 1.53336214 | 1148   | 1160   | -0.69898198  | 2791468 | 0.26688944  | 2111935  | -0.87729732 | empty        |                      |                                                          |
| 3261 O02 | E | 1640   | 1640   | 1.43219194 | 1105   | 1160   | 0.1809337    | 87236   | -3.4395218  | 87236    | -3.4395218  | empty        |                      |                                                          |
| 3261 O03 | X | 2014   | 2040   | 0.69661704 | 1543   | 1560   | 0.35352114   | 2549272 | 0.6232572   | 2287441  | -0.60680113 | experimental | Sigma-Aldrich C-102  | 8-Cyclopentyl-1,3-dimethylxanthine; CPT; 8-Cyclopentyl   |
| 3261 O04 | X | 2374   | 2400   | 1.19287443 | 1343   | 1360   | -0.17939183  | 2683972 | 0.11228382  | 2299368  | -0.58841881 | experimental | Sigma-Aldrich D 7505 | 2,2'-Bipyridyl; alpha, alpha'-Bipyridyl                  |
| 3261 O05 | X | 2453   | 2480   | 1.30177536 | 1420   | 1440   | 0.02577967   | 2798867 | 0.27883544  | 1587680  | -1.68529808 | experimental | Sigma-Aldrich C-130  | (*)-Chloro-APB hydrobromide; (*)-SKF-82958 hydrobrn      |
| 3261 O06 | X | 2413   | 2440   | 1.24663565 | 1382   | 1400   | -0.0754738   | 3089794 | 0.67777376  | 2613150  | -0.10480664 | experimental | Sigma-Aldrich D 8040 | (*)-trans-U-50488 methanesulfonate; trans-(*)-3,4-Di     |
| 3261 O07 | X | 2370   | 2400   | 1.18736046 | 1460   | 1480   | 0.13236226   | 3184787 | 0.80803444  | 3023539  | 0.52769972  | experimental | Sigma-Aldrich C-197  | 8-(3-Chlorostyryl)caffeine; CSC                          |
| 3261 O08 | X | 3452   | 3480   | 2.67888962 | 2582   | 2600   | 3.12200403   | 4237616 | 2.25174314  | 4253697  | 2.4236637   | experimental | Sigma-Aldrich S 5567 | SP600125; Anthrapyrazolone; 9-Pyrazoloanthrone           |
| 3261 O09 | X | 2490   | 2520   | 1.35277959 | 1738   | 1760   | 0.87311129   | 2822027 | 0.31059396  | 2996582  | 0.48656875  | experimental | Sigma-Aldrich C-271  | CK 546; 1-(1,4-Benzodioxan-6-ylcarbamoyl)piperidine      |
| 3261 O10 | X | 2490   | 2520   | 1.35277959 | 1738   | 1760   | 0.87311129   | 2822027 | 0.31059396  | 2996582  | 0.48656875  | experimental | Sigma-Aldrich C-271  | CK 546; 1-(1,4-Benzodioxan-6-ylcarbamoyl)piperidine      |
| 3261 O11 | X | 2413   | 2440   | 1.24663565 | 1422   | 1440   | 0.03110879   | 2729836 | 0.18417557  | 2725089  | 0.06771179  | experimental | Sigma-Aldrich D 1262 | PI, P4-D(adenosine-5')tetraphosphate triammonium; Ac     |
| 3261 O12 | X | 2252   | 2280   | 1.02469832 | 1182   | 1200   | -0.60838677  | 864309  | -2.37395833 | 798187   | -2.90209323 | experimental | Sigma-Aldrich A9605  | Ac-93253 iodide; 2-[3-{1,3-Dihydro-1,3,3-trimethyl-2H-   |
| 3261 O13 | X | 2753   | 2760   | 1.68775333 | 1459   | 1480   | 0.12969769   | 2733811 | 0.18962635  | 2062010  | -0.95424354 | experimental | Sigma-Aldrich S4572  | SANT-1; (4-Benzyl)piperazin-1-yl]-3-(5-dimethyl-1-pher   |
| 3261 O14 | X | 2252   | 2280   | 1.02469832 | 1341   | 1360   | -0.18472096  | 2673035 | 0.10628628  | 1837950  | -1.29957291 | experimental | Sigma-Aldrich D-103  | (*)-2,3-Dichloro-alpha-methylbenzylamine hydrochlorid    |
| 3261 O15 | X | 2172   | 2200   | 0.9144189  | 1540   | 1560   | 0.34552745   | 2509159 | -0.11843132 | 1579333  | -1.69816278 | experimental | Sigma-Aldrich D 3648 | N,N,N'-Tetramethylazodicarboxamide; Azodicarbonyloxyl    |
| 3261 O16 | X | 2753   | 2760   | 1.68775333 | 1583   | 1600   | 0.46010374   | 2638329 | 0.05869512  | 1321261  | -2.09591267 | experimental | Sigma-Aldrich D-131  | 3,5-Dinitrocatatechol; OR-486                            |
| 3261 O17 | X | 2212   | 2240   | 1.02313982 | 1624   | 1640   | 0.32231952   | 2082121 | 0.40032012  | 14407001 | -2.25175375 | experimental | Sigma-Aldrich C 2444 | Idronomic acid; ClzMDI; Clodronic acid disodium magne    |
| 3261 O18 | X | 2212   | 2240   | 0.96955861 | 2624   | 2640   | 3.23391574   | 2338626 | 0.88186216  | 3791068  | 1.7064314   | experimental | Sigma-Aldrich A 3846 | AG-8810; (5Z, 13E)-(9S, 15S, 15R)-9,15-Dihydroxy-11-fl   |
| 3261 O19 | X | 2132   | 2160   | 0.85927919 | 1295   | 1320   | -0.30729094  | 955741  | -2.24858073 | 1013878  | -2.56966246 | experimental | Sigma-Aldrich D 5439 | 2,3-Dimethoxy-1,4-naphthoquinone; DMNQ                   |
| 3261 O20 | X | 2252   | 2280   | 1.02469832 | 1182   | 1200   | -0.60838677  | 864309  | -2.37395833 | 798187   | -2.90209323 | experimental | Sigma-Aldrich E 0516 | Etodolac; 1,8-Diethyl-1,3,4,9-tetrahydropyran[3,4-b]in   |
| 3261 O21 | X | 2928   | 2960   | 1.95655942 | 2217   | 2240   | 2.14943786   | 2951701 | 0.48841152  | 3114259  | 0.66752066  | experimental | Sigma-Aldrich D 5891 | 1,1-Dimethyl-4-phenyl-piperazinone iodide; DMPPP         |
| 3261 O22 | X | 3117   | 3160   | 2.21709455 | 2207   | 2240   | 2.12279221   | 2709455 | 0.15622799  | 2533714  | -0.22723628 | experimental | Sigma-Aldrich E 3132 | E-64; L-trans-3-Carboxyoxiran-2-carbonyl-L-leucylgama    |
| 3261 O23 | E | 3334   | 3320   | 2.51627248 | 2752   | 4720   | 3.57498006   | 88777   | -3.43741906 | 87346    | -4.00321552 | empty        |                      |                                                          |
| 3261 O24 | E | 666361 | 670480 | 916.494144 | 662641 | 666720 | 1761.89202   | 2630859 | 0.05942189  | 2630859  | -0.05155848 | empty        |                      |                                                          |
| 3261 P01 | N | 2626   | 2640   | 1.5025461  | 1254   | 1520   | 2.7624876    | 1418847 | -1.51353918 | 1964063  | 1.05202099  | empty        |                      |                                                          |
| 3261 P02 | E | 2260   | 2280   | 1.03572626 | 1028   | 1040   | -0.101872976 | 84845   | -3.44281088 | 75261    | -0.41629291 | empty        |                      |                                                          |
| 3261 P03 | X | 2781   | 2800   | 1.75392098 | 1620   | 1640   | 0.58000916   | 2025618 | -0.78149469 | 2576718  | -0.16095696 | experimental | Sigma-Aldrich G 9797 | GW9508; 4-(3-Phenoxybenzylamino)phenylpropionic aci      |
| 3261 P04 | X | 2218   | 2240   | 0.97782956 | 1425   | 1440   | 0.03910249   | 1804787 | -1.08431275 | 2510476  | -0.26305152 | experimental | Sigma-Aldrich G-119  | GYKI 52466 hydrochloride; 1-(4-Aminophenyl)-4-methy      |
| 3261 P05 | X | 2027   | 2040   | 1.14462719 | 2027   | 2040   | 1.64317053   | 2351542 | -0.33456617 | 2649914  | -0.04814464 | experimental | Sigma-Aldrich E 7881 | Emodin                                                   |
| 3261 P06 | X | 2460   | 2480   | 1.31142481 | 1545   | 1560   | 0.35885027   | 2079678 | -0.70736405 | 2582983  | -0.15130112 | experimental | Sigma-Aldrich H 1252 | 4-Hydroxy-3-methoxyphenylacetic acid; Homovanillic ac    |
| 3261 P07 | X | 2219   | 2240   | 0.97928086 | 1627   | 1640   | 0.57734459   | 2139815 | -0.62490022 | 2495205  | -0.28658774 | experimental | Sigma-Aldrich H 1050 | (-)-Eseroline fumarate                                   |
| 3261 P08 | X | 2338   | 2360   | 1.14324869 | 1464   | 1480   | 0.14302052   | 1837925 | -1.03887174 | 2516478  | -0.25380103 | experimental | Sigma-Aldrich H 2380 | 5-Hydroxy-DL-DOPA; 2,5-Dihydroxy-DL-tyrosine             |
| 3261 P09 | X | 1979   | 2000   | 0.64836979 | 1385   | 1400   | -0.06748011  | 1355912 | -1.69983981 | 1717497  | -1.48521942 | experimental | Sigma-Aldrich F 1553 | S-(+)-Fluoxetine hydrochloride                           |
| 3261 P10 | X | 2381   | 2400   | 1.20252388 | 2026   | 2040   | 1.64050597   | 1901423 | -0.95179908 | 2306241  | -0.57782598 | experimental | Sigma-Aldrich H 5257 | HSPD-1; 6-(3,4-dihydroxyethyl)-4-hydroxy-2-pyrone        |
| 3261 P11 | X | 2259   | 2280   | 1.03434777 | 1465   | 1480   | 0.14568508   | 1344562 | -1.71540368 | 1587686  | -1.68528883 | experimental | Sigma-Aldrich F 4765 | Fluphenazine dihydrochloride                             |
| 3261 P12 | X | 2342   | 2360   | 1.14600568 | 1547   | 1560   | 0.3641794    | 901951  | -2.32234114 | 1052883  | -2.50954655 | experimental | Sigma-Aldrich P20013 | Nelfinavir mesylate hydrate; AG-1343; Nelfinavir metha   |
| 3261 P13 | X | 2377   | 2400   | 1.19700991 | 1666   | 1680   | 0.68126262   | 1994186 | -0.82459633 | 2413945  | -0.41182859 | experimental | Sigma-Aldrich F 6800 | Fenoldopam bromide; SKF-82526                            |
| 3261 P14 | X | 2860   | 2880   | 1.86282191 | 1746   | 1760   | 0.89442781   | 2068447 | -0.72276474 | 2340807  | -0.52455152 | experimental | Sigma-Aldrich H 8876 | 5-Hydroxyindoleacetic acid; 5-HIAA                       |
| 3261 P15 | X | 2378   | 2400   | 1.13983884 | 1656   | 1880   | 1.21417559   | 2107382 | -0.66937449 | 2681641  | 0.00075916  | experimental | Sigma-Aldrich F 9397 | Flutamide; 2-Methyl-N-(4-nitro-3-(trifluoromethyl)phenyl |
| 3261 P16 | X | 2338   | 2360   | 1.14324869 | 1625   | 1640   | 0.57201546   | 2161342 | -0.59538097 | 2474068  | -0.31916485 | experimental | Sigma-Aldrich H 9876 | Hydroxyflavone hydrochloride                             |
| 3261 P17 | X | 2459   | 2480   | 1.31004632 | 1548   | 1560   | 0.36684397   | 1552094 | -1.43082209 | 1830957  | -1.31035077 | experimental | Sigma-Aldrich F-132  | Fluoxetine hydrochloride; Prozac; LY-1100, 140 hydrochl  |
| 3261 P18 | X | 2658   | 2680   | 1.58436638 | 1382   | 1400   | -0.0754738   | 1920746 | -0.92530211 | 2431616  | -0.38459341 | experimental | Sigma-Aldrich H-140  | R-(+)-8-Hydroxy-DPAT hydrobromide; (+)-8-Hydroxy-2       |
| 3261 P19 | X | 2898   | 2920   | 1.91520464 | 1946   | 1960   | 1.42734078   | 2356615 | -0.32760973 | 2549185  | -0.20339181 | experimental | Sigma-Aldrich G 3416 | Guandinyl-naltrindole dihydrochloride; GNTI di-triflu    |
| 3261 P20 | X | 2656   | 2680   | 1.58160939 | 1943   | 1960   | 1.14934709   | 2161444 | -0.59       |          |             |              |                      |                                                          |

|          |   |        |            |                |        |            |             |         |             |          |              |   |              |                       |                                                          |
|----------|---|--------|------------|----------------|--------|------------|-------------|---------|-------------|----------|--------------|---|--------------|-----------------------|----------------------------------------------------------|
| 3262 A19 | X | 2032   | 2040       | 3.80623254     | 2274   | 2280       | 4.55095841  | 3574129 | 0.81259029  | 3889445  | 0.96971277   | W | experimental | Sigma-Aldrich L 5025  | Leflunomide; 5-Methylisoxazole-4-(4-(trifluoromethyl)car |
| 3262 A20 | X | 1029   | 1040       | 0.70508249     | 708    | 720        | -0.33069425 | 3353553 | 0.47147564  | 3745925  | 0.75532849   |   | experimental | Sigma-Aldrich P20139  | SC-58125 ; 5-(4-Fluorophenyl)-1-[4-(methylsulfonyl)]p    |
| 3262 A21 | X | 1032   | 1040       | 0.71435811     | 1192   | 1200       | 1.17806685  | 2432954 | -0.95220513 | 3239248  | -0.00152482  |   | experimental | Sigma-Aldrich P20100  | CP-154526 hydrochloride; N-Butyl-N-ethyl-2,5-dimeth      |
| 3262 A22 | X | 908    | 920        | 0.33096568     | 1065   | 1080       | 0.78217293  | 2613966 | -0.67227511 | 3374859  | 0.20104533   |   | experimental | Sigma-Aldrich M 6690  | MDL 28170; Z-val-Phe-CHO                                 |
| 3262 A23 | E | 1202   | 1040       | -2.39976796    | 2265   | 3280       | 4.52902923  | 604660  | -4.2395     | 72250    | -2.56792545  |   | empty        |                       |                                                          |
| 3262 A24 | P | 286259 | 286920     | 882.600426     | 346443 | 347240     | 1077.42038  | 1122687 | -1.43202442 | 2683661  | -0.83143788  |   | empty        |                       |                                                          |
| 3262 B01 | N | 515    | 520        | -0.88414097    | 595    | 600        | -0.68294632 | 2526432 | -0.807644   | 2966587  | -0.40881463  |   | empty        |                       |                                                          |
| 3262 B02 | E | 155    | 160        | -1.99721577    | 196    | 200        | -1.92673905 | 63595   | -4.61635297 | 70746    | -4.73450307  |   | empty        |                       |                                                          |
| 3262 B03 | X | 712    | 720        | -0.27504171    | 394    | 400        | -1.3095186  | 2623442 | -0.65762073 | 3099711  | -0.209995946 |   | experimental | Sigma-Aldrich M 8046  | Mifepristone; RU-486                                     |
| 3262 B04 | X | 711    | 720        | -0.27813358    | 633    | 640        | -0.56448987 | 2649729 | -0.61696861 | 3333604  | 0.1394203    |   | experimental | Sigma-Aldrich N-144   | Nitrendipine; 1,4-Dihydro-2,6-dimethyl-4-(3-nitrophen    |
| 3262 B05 | X | 630    | 640        | -0.52857541    | 712    | 720        | -0.31822515 | 2728826 | -0.4946473  | 3282775  | 0.06349403   |   | experimental | Sigma-Aldrich M 9511  | Minoxidil hydrochloride                                  |
| 3262 B06 | X | 831    | 840        | 0.09289135     | 632    | 640        | -0.56760715 | 2812461 | -0.3653081  | 356458   | 0.52958118   |   | experimental | Sigma-Aldrich P20135  | PhA-543613 ; N-(3R)-1-Azabicyclo[2.2.2]oct-3-yl)furo     |
| 3262 B07 | X | 832    | 840        | 0.09598322     | 471    | 480        | -1.06948842 | 3117152 | 0.10588806  | 3616858  | 0.5625335    |   | experimental | Sigma-Aldrich M-108   | (-)-MK-801 hydrogen maleate; (5S,10R)-(4)-5-Methyl-      |
| 3262 B08 | X | 550    | 560        | -0.77592537    | 829    | 840        | 0.04649603  | 2839885 | -0.32289765 | 3380179  | 0.20899212   |   | experimental | Sigma-Aldrich O 0886  | Olumocine; 2-[[9-Methyl-6-[[phenylmethyl]amino]-9H       |
| 3262 B09 | X | 672    | 680        | -0.39871669    | 869    | 880        | 0.17118703  | 2448492 | -0.92817604 | 2724802  | -0.76998314  |   | experimental | Sigma-Aldrich M-149   | Methiothepin mesylate; 1-[10,11-Dihydro-8-(methylthi     |
| 3262 B10 | X | 672    | 600        | -0.64915852    | 631    | 640        | -0.57072442 | 3634734 | 0.90631424  | 3379003  | 0.20723546   |   | experimental | Sigma-Aldrich O 3752  | Orphenadrine hydrochloride; beta-Dimethylaminoethyl 2    |
| 3262 B11 | X | 1152   | 1160       | 1.08538304     | 1074   | 1080       | 0.8102284   | 3936795 | 1.37344318  | 4007523  | 1.14609284   |   | experimental | Sigma-Aldrich M-216   | MDL 105,519; (Z)-2-Carboxy-4,6-dichloroindole-3-(2'-pi   |
| 3262 B12 | X | 629    | 640        | -0.53166729    | 592    | 600        | -0.69229815 | 2041749 | -1.55719279 | 2280334  | -1.43391122  |   | experimental | Sigma-Aldrich O-111   | (4)-Octoclotheptin maleate; 1-(8-Chloro-10,11-dihydro    |
| 3262 B13 | X | 913    | 920        | 0.34642505     | 632    | 640        | -0.56760715 | 3968018 | 1.42172868  | 3762392  | 0.77992622   |   | experimental | Sigma-Aldrich N 1771  | nor-Binaltorphimine dihydrochloride; nor-BNI dihydroc    |
| 3262 B14 | X | 590    | 600        | -0.65225039    | 994    | 1000       | 0.5680464   | 2933953 | -0.1774241  | 3664408  | 0.63356174   |   | experimental | Sigma-Aldrich P 0878  | O-Phospho-L-serine; L-Phosphoserine                      |
| 3262 B15 | X | 1110   | 1120       | 0.95552431     | 548    | 560        | -0.82945825 | 1686821 | -2.10660797 | 2346863  | -1.33453291  |   | experimental | Sigma-Aldrich .       | PD-407824                                                |
| 3262 B16 | X | 669    | 680        | -0.40799231    | 1191   | 1200       | 1.17494958  | 3582724 | 0.78807098  | 3585811  | 0.47537715   |   | experimental | Sigma-Aldrich P 1918  | Pancuronium bromide; 1,1'-(2beta,3alpha,5alpha,16beta'   |
| 3262 B17 | X | 869    | 880        | -0.21038258    | 587    | 600        | -0.70788452 | 3491503 | 0.68481148  | 3351587  | 0.16628257   |   | experimental | Sigma-Aldrich E 2515  | Eprosartan mesylate                                      |
| 3262 B18 | X | 588    | 600        | -0.65843414    | 787    | 800        | -0.08442952 | 3147469 | 0.15277246  | 3289600  | 0.07288223   |   | experimental | Sigma-Aldrich P 3520  | Pentolinum di(L(+)-tartrate); 1,1'-Pentamethylenebis(1   |
| 3262 B19 | X | 627    | 640        | -0.53785104    | 707    | 720        | -0.33381152 | 2520636 | -0.81660735 | 3285527  | -1.27677821  |   | experimental | Sigma-Aldrich N 7510  | Nicardipine hydrochloride; YC-93 hydrochloride           |
| 3262 B20 | X | 859    | 870        | -0.21688755    | 835    | 840        | -0.33381152 | 3257016 | 0.80159024  | 3874958  | 0.55552568   |   | experimental | Sigma-Aldrich M 5433  | Sulpiric acid sodium; 2-Propylpentanoic acid sodium      |
| 3262 B21 | X | 871    | 880        | 0.21655215     | 831    | 840        | 0.05273058  | 2676701 | 0.64597647  | 3828994  | 0.87810056   |   | experimental | Sigma-Aldrich N 8652  | NF 023; 8,8'-[carboxylate]-3,1-phenylene carbonyl        |
| 3262 B22 | X | 988    | 1000       | 0.57831563     | 825    | 840        | 0.03402693  | 2755096 | -0.45402148 | 3575195  | 0.50029902   |   | experimental | Sigma-Aldrich P 5514  | Pyrimilamine maleate; Mepyramine maleate                 |
| 3262 B23 | E | 1011   | 1680       | 0.64942875     | 1554   | 2360       | 2.3065204   | 65997   | -4.61263834 | 73322    | -4.73065514  |   | empty        |                       |                                                          |
| 3262 B24 | P | 224911 | 226400     | 692.920114     | 270126 | 271840     | 839.519302  | 2278774 | -1.19064021 | 2899011  | -0.50975689  |   | empty        |                       |                                                          |
| 3262 C01 | N | 756    | 760        | -0.13899923    | 876    | 880        | 0.19300795  | 3051848 | 0.00489724  | 3309869  | 0.10396593   |   | empty        |                       |                                                          |
| 3262 C02 | E | 193    | 200        | -1.87972454    | 154    | 160        | -2.0576646  | 62281   | -4.61838503 | 78776    | -4.72250818  |   | empty        |                       |                                                          |
| 3262 C03 | X | 1152   | 1160       | 1.08538304     | 755    | 760        | -0.18418232 | 3314939 | 0.41176016  | 3296269  | 0.08365081   |   | experimental | Sigma-Aldrich I 2765  | (4)-Ibotenic acid; (4)-alpha-Amino-3-hydroxy-5-isoxaz    |
| 3262 C04 | X | 959    | 960        | -0.46082442    | 712    | 720        | -0.69853232 | 3434342 | 0.3234548   | 3874958  | 0.74837959   |   | experimental | Sigma-Aldrich L 1498  | 4-(3-Phenylpropyl)-1-piperazine dihydrochloride          |
| 3262 C05 | X | 751    | 760        | -0.15445861    | 912    | 920        | 0.30522985  | 2898855 | -0.23170218 | 3323680  | 0.12459624   |   | experimental | Sigma-Aldrich I 6138  | Idoxazon hydrochloride; RX 781094                        |
| 3262 C06 | X | 912    | 920        | 0.34333318     | 791    | 800        | -0.07196042 | 3814755 | 1.18471171  | 4384477  | 1.70917126   |   | experimental | Sigma-Aldrich L-134   | Linopirdine; DuP 996                                     |
| 3262 C07 | X | 547    | 560        | -0.78520099    | 670    | 680        | -0.4491507  | 3070222 | 0.03331212  | 3497705  | 0.38454764   |   | experimental | Sigma-Aldrich I 8005  | S(+)-Isoproterenol (+)-bitartrate                        |
| 3262 C08 | X | 1392   | 1400       | 1.8274329      | 1352   | 1360       | 1.67683085  | 3633530 | 0.90445529  | 3763018  | 0.78086613   |   | experimental | Sigma-Aldrich M 1404  | Nocodazole; R 17934                                      |
| 3262 C09 | X | 910    | 920        | 0.33714943     | 709    | 720        | -0.32757697 | 3685953 | 0.985523    | 3361455  | 0.18102298   |   | experimental | Sigma-Aldrich I-106   | S(+)-Ibuprofen; S-(+)-2-(4-Isobutylphenyl)propionic ac   |
| 3262 C10 | X | 792    | 800        | -0.02769175    | 713    | 720        | -0.31510787 | 3707343 | 1.01860204  | 3820711  | 0.86704074   |   | experimental | Sigma-Aldrich M 2398  | Metaprotrenolol hemisulfate                              |
| 3262 C11 | X | 1547   | 1560       | -0.64915852    | 735    | 740        | -0.32913548 | 3258084 | 0.3234548   | 3874958  | 0.74837959   |   | experimental | Sigma-Aldrich L 138   | 1,5-Isosquinolinediol; 1,5-Dihydroxyisoguinoline         |
| 3262 C12 | X | 392    | 400        | -1.26444153    | 312    | 400        | -1.30648202 | 2444551 | -0.61817022 | 2414451  | -1.23357273  |   | experimental | Sigma-Aldrich B7936   | BMBP; 5-(Benzyloxyethyl)-4-bromo-2-methyl-3-(2H)-pyrid   |
| 3262 C13 | X | 632    | 640        | -0.52239166    | 473    | 480        | -1.06325387 | 3566466 | 0.80073968  | 3381362  | 0.21075924   |   | experimental | Sigma-Aldrich K 0250  | Kainic acid; 2-Carboxy-3-carboxymethyl-4-isopropenylp    |
| 3262 C14 | X | 714    | 720        | -0.27813358    | 632    | 640        | -0.56760715 | 3468470 | 0.64919159  | 3541603  | 0.45012067   |   | experimental | Sigma-Aldrich U-106   | (-)-cis-(1S,2R)-U-50488 tartrate; (-)-(1S,2R)-cis-3,4-Di |
| 3262 C15 | X | 909    | 900        | 1.000.58449938 | 1072   | 1080       | -1.06637115 | 2491955 | -0.80696172 | 2133082  | -1.65387019  |   | experimental | Sigma-Aldrich U 6881  | U-73343; 1-[6-((17)-3-Methoxyestra-1,3,5[10]-trien       |
| 3262 C16 | X | 990    | 1020       | 0.33405755     | 431    | 1040       | 0.67618558  | 4256843 | 1.86838852  | 3261084  | 0.0310929    |   | experimental | Sigma-Aldrich M 4659  | Milrinone; 1,6-Dihydro-2-methyl-6-oxo-[3,4'-bipyridin    |
| 3262 C17 | X | 1468   | 1480       | 2.06241536     | 1066   | 1080       | 0.7852902   | 3298433 | 0.38623409  | 3051697  | 0.186218081  |   | experimental | Sigma-Aldrich L 2536  | 2,5-Dihydroxy-1-methylpyrrolidine hydrochloride          |
| 3262 C18 | X | 1569   | 2.30667364 | 2347           | 2360   | 4.77851948 | 106332782   | 3166546 | 1.60332782  | 31067381 | 0.78137958   |   | experimental | Sigma-Aldrich P 20135 | Methyl-2-(phenylethynyl)pyridine hydrochloride; MPF      |
| 3262 C19 | X | 1068   | 1080       | 0.82566559     | 846    | 800        | -0.0875468  | 3446339 | 0.57917647  | 3092329  | -0.20007875  |   | experimental | Sigma-Aldrich V 11829 | VER-332-L-arginine; (S)-1-(6-Bromo-2,3-dihy              |
| 3262 C20 | X | 911    | 920        | 0.3402413      | 952    | 960        | 0.42992085  | 3501296 | 0.69995680  | 3626204  | 0.57649417   |   | experimental | Sigma-Aldrich M 6383  | DNC 2-methoxyestradiol; 2-Hydroxyestradiol-2-methyl et   |
| 3262 C21 | X | 391    | 400        | -1.2675334     | 390    | 400        | -1.3219877  | 928695  | -3.27849896 | 1093634  | -3.20655495  |   | experimental | Sigma-Aldrich N 0287  | Sigma-Aldrich N 0287                                     |
| 3262 C22 | X | 668    | 680        | -0.41108418    | 827    | 840        | 0.04026148  | 3260589 | 0.3277094   | 3600817  | 0.53857211   |   | experimental | Sigma-Aldrich M 6760  | Myricetin; Cannabiscetin                                 |
| 3262 C23 | E | 936    | 1600       | 0.41753816     | 1682   | 2400       | 2.7055316   | 66033   | -4.61258267 | 74329    | -4.72915093  |   | empty        |                       |                                                          |
| 3262 C24 | P | 224501 | 225800     | 691.652445     | 240721 | 242240     | 747.855831  | 2532297 | -0.79857394 | 2968252  | -0.40632752  |   | empty        |                       |                                                          |
| 3262 D01 | N | 635    | 640        | -0.51311604    | 595    | 600        | -0.68294632 | 2848398 | -0.30973253 | 2952462  | -0.42991398  |   | empty        |                       |                                                          |
| 3262 D02 | E | 195    | 200        | -1.87354079    | 156    | 160        | -2.05143005 | 64467   | -4.61500444 | 74580    | -4.72877599  |   | empty        |                       |                                                          |
| 3262 D03 | X | 873    | 880        | 0.22275007     | 554    | 560        | -0.8107546  | 3547011 | 0.77065306  | 3609642  | 0.55175454   |   | experimental | Sigma-Aldrich M 8131  | L-alpha-Methyl-p-tyrosine; (S)-alpha-Methyltyrosine      |
| 3262 D04 | X | 706    | 720        | -0.29359296    | 931    | 1000       | 0.55149458  | 2983566 | -0.10069897 | 3192716  | -0.07103241  |   | experimental | Sigma-Aldrich N-149   | Nitrodipine; 1,4-Dihydro-2,6-dimethyl-4-(3-nitrophenyl)  |
| 3262 D05 | X | 711    | 720        | -0.27813358    | 633    | 640        | -0.57072442 | 2980282 | -0.10577759 | 2766367  | -0.70789505  |   | experimental | Sigma-Aldrich M 9651  | Maprotiline hydrochloride; 9-(gamma-Methylaminoprop      |
| 3262 D06 | X | 750    | 760        | -0.15755048    | 752    | 760        | -0.19353415 | 3159783 | 0.17181572  | 3515738  | 0.41148459   |   | experimental | Sigma-Aldrich N-170   | NS-1619; 1,3-Dihydro-1-[2-hydroxy-5-(trifluoromethyl)    |
| 3262 D07 | X | 1273   | 1280       | 1.45949985     | 752    | 760        | -0.19353415 | 3419475 | 0.57342218  | 3802593  | 0.83997682   |   | experimental | Sigma-Aldrich M-109   | 2-Methyl-5-hydroxytryptamine maleate; 2-Methylseroto     |
| 3262 D08 | X | 628    | 640        | -0.53475916    | 549    | 560        | -0.82634097 | 3256681 | 0.32166578  | 3712848  | 0.70591942   |   | experimental | Sigma-Aldrich O 1008  | Oleic acid; Elaicic acid                                 |
| 3262 D09 | X | 711    | 720        | -0.27813358    | 633    | 640        | -0.57072442 | 2980282 | -0.10577759 | 2766367  | -0.70789505  |   | experimental | Sigma-Aldrich N4163   | Nemadipine-A; 1,4-Dihydro-2,6-dimethyl-4-(pentafluorc    |
| 3262 D10 | X | 792    | 800        | -0.02769175    | 713    | 720        | -0.31510787 | 3707343 | 1.01860204  | 3820711  | 0.86704074   |   | experimental | Sigma-Aldrich T 5575  | TC003; (Z)-1-(3-Ethyl-5-methoxy-2,3-dihydrobenzothia     |
| 3262 D11 | X | 672    | 680        | -0.39871669    | 869    | 880        | 0.17118703  | 2448492 | -0.92817604 | 2724802  | -0.76998314  |   | experimental | Sigma-Aldrich S 7198  | Sivilestat sodium salt hydrate ; EI 546, Etaspol, LY 544 |
| 3262 D12 | X | 714    | 720        | -0.26885796    | 614    | 320        | -1.56201787 | 3571846 | 0.8090597   | 3421503  | 0.27072022   |   | experimental | Sigma-Aldrich P 0130  | Progesterone; 4-Pregnone-3,20-dione                      |
| 3262 D13 | X | 593    | 600        | -0.64297477    | 873    | 880        | 0.1867734   | 3792141 | 1.14973979  | 3989084  | 1.11854942   |   | experimental | Sigma-Aldrich N2001   | Neostigmine bromide                                      |
| 3262 D14 |   |        |            |                |        |            |             |         |             |          |              |   |              |                       |                                                          |

|          |   |        |        |             |        |        |              |         |             |         |             |              |                      |                                                                                                     |
|----------|---|--------|--------|-------------|--------|--------|--------------|---------|-------------|---------|-------------|--------------|----------------------|-----------------------------------------------------------------------------------------------------|
| 3262 E13 | X | 472    | 480    | -1.01709157 | 670    | 680    | -0.4491507   | 2326204 | -1.11729103 | 2818640 | -0.62981179 | experimental | Sigma-Aldrich K 1003 | Ketoconazole; cis-1-Acetyl-4-[[4-(2-(2-(4-Chlorophenyl)hydrochloride; N-Methyl-N-propargyl-3-(2,4-t |
| 3262 E14 | X | 914    | 920    | 0.34951693  | 1353   | 1360   | 1.67994813   | 3170128 | 0.18781398  | 3566548 | 0.48738249  | experimental | Sigma-Aldrich M 3778 | Clorgyline hydrochloride; N-Methyl-N-propargyl-3-(2,4-t                                             |
| 3262 E15 | X | 512    | 520    | -0.8934166  | 710    | 720    | -0.3244597   | 3179711 | 0.20263382  | 3670681 | 0.64293209  | experimental | Sigma-Aldrich L 0258 | alpha-Methyl-4-carboxyphenylglycine; (S)-MCPG                                                       |
| 3262 E16 | X | 840    | 850    | 0.0990751   | 832    | 840    | 0.05584785   | 3306926 | 0.39356828  | 3591820 | 0.52513276  | experimental | Sigma-Aldrich M 4796 | Osivamils; N-Vanillyloxyethylamine                                                                  |
| 3262 E17 | X | 750    | 760    | -0.15755048 | 832    | 840    | 0.05584785   | 3306926 | 0.39356828  | 3591820 | 0.52513276  | experimental | Sigma-Aldrich O 0287 | Mibefradil dihydrochloride; Ro 40-5967; (1S,2S)-2-[2-[3                                             |
| 3262 E18 | X | 629    | 640    | -0.53166729 | 908    | 920    | -0.95414925  | 1846901 | -1.8585198  | 1792475 | -2.16265495 | experimental | Sigma-Aldrich M 5441 | LiDocaine hydrochloride                                                                             |
| 3262 E19 | X | 911    | 920    | 0.3402413   | 511    | 520    | 0.30211258   | 3581480 | 0.82395841  | 3715097 | 0.70927889  | experimental | Sigma-Aldrich L 5647 | Cysteamine hydrochloride; Mercaptamine; MEA hydroch                                                 |
| 3262 E20 | X | 868    | 880    | 0.2072907   | 1028   | 1040   | 0.66683375   | 3378495 | 1.06677774  | 4076382 | 1.24895159  | experimental | Sigma-Aldrich M 6500 | Ro 90-7501; 2'-(4-Aminophenyl)-[2,5'-bi-1H-benzimidaz                                               |
| 3262 E21 | X | 1548   | 1560   | 2.30976531  | 1058   | 1070   | 2.16312575   | 3387574 | 0.52408817  | 3360853 | 0.18012374  | experimental | Sigma-Aldrich R 0529 | NG-Monomethyl-L-arginine acetate; L-NMMA                                                            |
| 3262 E22 | X | 1106   | 1120   | 0.94315682  | 1182   | 1200   | 1.1468941    | 3670729 | 0.96197951  | 3931138 | 1.03199207  | experimental | Sigma-Aldrich M 7033 |                                                                                                     |
| 3262 E23 | E | 711    | 720    | -0.27813358 | 1767   | 1780   | -0.27813358  | 1767    | 1780        | 67548   | -4.61023976 | empty        |                      |                                                                                                     |
| 3262 E24 | P | 191374 | 192560 | 589.227921  | 265918 | 267520 | 826.401809   | 2659088 | -0.61526904 | 3242650 | 0.00542415  | empty        |                      |                                                                                                     |
| 3262 F01 | N | 636    | 640    | -0.51002417 | 635    | 640    | -0.55825532  | 3027667 | -0.032498   | 2963027 | -0.41413241 | empty        |                      |                                                                                                     |
| 3262 F02 | E | 116    | 120    | -2.11779887 | 115    | 120    | -2.17923833  | 64681   | -4.6146735  | 74618   | -4.72871923 | empty        |                      |                                                                                                     |
| 3262 F03 | X | 475    | 480    | -1.00781595 | 755    | 760    | -0.18418232  | 3237467 | 0.29195187  | 3461490 | 0.33045116  | experimental | Sigma-Aldrich S 1068 | SB-215505; 6-Chloro-5-methyl-1-5-quinolincarbonyl-ir                                                |
| 3262 F04 | X | 509    | 520    | -0.90269222 | 470    | 480    | -1.0726057   | 2915284 | -0.20629519 | 3454402 | 0.31986639  | experimental | Sigma-Aldrich N-151  | Nisoxetine hydrochloride; LY-94,939                                                                 |
| 3262 F05 | X | 713    | 720    | -0.27194983 | 712    | 720    | -0.31510787  | 3583221 | 0.82665082  | 3426396 | 0.27802819  | experimental | Sigma-Aldrich M 9656 | H-8 dihydrochloride; N-[2-(Methylamino)ethyl]-5-isouqui                                             |
| 3262 F06 | X | 553    | 560    | -0.76664974 | 752    | 760    | -0.19353415  | 3232146 | 0.28372309  | 3628563 | 0.58001795  | experimental | Sigma-Aldrich P20124 | CP-66713 ; 8-chloro-N-phenyl-1,2,4-triazolo[4,3-a]qui                                               |
| 3262 F07 | X | 713    | 720    | -0.27194983 | 712    | 720    | -0.31510787  | 3583221 | 0.82665082  | 3426396 | 0.27802819  | experimental | Sigma-Aldrich M-110  | alpha-Methyl-5-hydroxytryptamine maleate; alpha-Meth                                                |
| 3262 F08 | X | 671    | 680    | -0.40180856 | 630    | 640    | -0.5738417   | 3171332 | 0.19245958  | 3680214 | 0.65717209  | experimental | Sigma-Aldrich O 2378 | Oxymetazoline hydrochloride; 3-(4,5-Dihydro                                                         |
| 3262 F09 | X | 1032   | 1040   | 0.71435811  | 1192   | 1200   | 1.17806685   | 3293837 | 0.37912651  | 3921856 | 1.01812699  | experimental | Sigma-Aldrich M3071  | Moclobemide; 4-Chloro-N-[2-(4-morpholinyl)ethyl]benz                                                |
| 3262 F10 | X | 751    | 760    | -0.15445861 | 911    | 920    | 0.30211258   | 3093307 | 0.06659489  | 3821266 | 0.86786978  | experimental | Sigma-Aldrich O 8757 | Ofloxacin; Ofloxacin; DL-8280; HOE-280                                                              |
| 3262 F11 | X | 868    | 880    | 0.2072907   | 827    | 840    | 0.04026148   | 3707989 | 1.01960106  | 3566975 | 0.48802032  | experimental | Sigma-Aldrich M-226  | p-MPPF dihydrochloride; 4-Fluoro-N-(2-[4-(2-methoxyp                                                |
| 3262 F12 | X | 2152   | 2160   | 4.17725477  | 1992   | 2000   | 3.67188868   | 7907191 | 7.51355025  | 8653469 | 8.08601615  | experimental | Sigma-Aldrich T2705  | Topotecan hydrochloride hydrate                                                                     |
| 3262 F13 | X | 629    | 640    | -0.53166729 | 829    | 840    | 0.04649603   | 3177941 | 0.19989565  | 4051878 | 1.21234852  | experimental | Sigma-Aldrich M 9656 | R, 24c; Nebostol                                                                                    |
| 3262 F14 | X | 311    | 320    | -1.51488336 | 310    | 320    | -0.92479147  | 3165911 | 1.1812925   | 3827207 | 0.65629345  | experimental | Sigma-Aldrich P 1061 | NC-525A hydrochloride; Proadifen hydrochloride                                                      |
| 3262 F15 | X | 593    | 600    | -0.29749877 | 552    | 560    | -0.481698915 | 3044820 | -0.78650369 | 3986721 | 1.11418018  | experimental | Sigma-Aldrich N 4159 | NCS-3919; 4,4-dihydro-7-methyl-4-oxo-1,8-nap                                                        |
| 3262 F16 | X | 711    | 720    | -0.27813358 | 752    | 760    | -0.19353415  | 3536438 | 0.75430221  | 3299324 | 0.08821424  | experimental | Sigma-Aldrich P 2116 | Pirfenidone; 5-Methyl-1-phenyl-2-(1H)-pyridine                                                      |
| 3262 F17 | X | 993    | 1000   | 0.59377501  | 671    | 680    | -0.44603342  | 3711964 | 1.02574829  | 3546022 | 0.45672159  | experimental | Sigma-Aldrich N 5504 | Naphazoline hydrochloride; 2-(1-Naphthylmethyl)imidaz                                               |
| 3262 F18 | X | 510    | 520    | -0.89960034 | 591    | 600    | -0.69541542  | 3573908 | 0.81224852  | 3525260 | 0.42570817  | experimental | Sigma-Aldrich T 9567 | Thiolactomycin; [R-(E)]-4-hydroxy-3,5-dimethyl-5-(2-m                                               |
| 3262 F19 | X | 711    | 720    | -0.27813358 | 671    | 680    | -0.44603342  | 3522710 | 0.73307224  | 3621676 | 0.56973043  | experimental | Sigma-Aldrich N 7758 | Naloxone hydrochloride                                                                              |
| 3262 F20 | X | 869    | 880    | 0.21038258  | 709    | 720    | -0.32757697  | 3696390 | 1.00166353  | 3743653 | 0.75193467  | experimental | Sigma-Aldrich P 4668 | Praziquantel; 2-(Cyclohexylcarbonyl)-1,2,3,6,7,11b-hex                                              |
| 3262 F21 | X | 1309   | 1320   | 1.57080733  | 947    | 960    | 0.41433448   | 3427078 | 0.58518001  | 3505327 | 0.39593307  | experimental | Sigma-Aldrich M 8784 | Norcantharidin                                                                                      |
| 3262 F22 | E | 840    | 850    | 0.07434801  | 1812   | 1820   | -0.07434801  | 3175779 | 0.29695342  | 3296537 | 0.18541682  | experimental | Sigma-Aldrich P 5679 | 3-n-Propylxanthine; Enprofylline                                                                    |
| 3262 F23 | E | 1125   | 1160   | 1.00190243  | 1762   | 1680   | 2.79904985   | 64862   | -4.61439359 | 76710   | -4.72559429 | empty        |                      |                                                                                                     |
| 3262 F24 | P | 186799 | 187920 | 575.082595  | 298976 | 300440 | 929.452686   | 2826704 | -0.3432817  | 3628648 | 0.58014492  | empty        |                      |                                                                                                     |
| 3262 G01 | N | 636    | 640    | -0.51002417 | 836    | 840    | 0.06831695   | 3008528 | -0.06209593 | 3292203 | 0.07757719  | empty        |                      |                                                                                                     |
| 3262 G02 | E | 236    | 240    | -1.74677394 | 155    | 160    | -2.05454732  | 66989   | -4.61110424 | 80234   | -4.72033028 | empty        |                      |                                                                                                     |
| 3262 G03 | X | 554    | 560    | -0.76355787 | 753    | 760    | -0.19041687  | 3251036 | 0.31293595  | 3174824 | -0.09775875 | experimental | Sigma-Aldrich I 3639 | Isotharaine mesylate; 4-[1-Hydroxy-2-((1-methylethyl)ar                                             |
| 3262 G04 | X | 554    | 560    | -0.76355787 | 552    | 560    | -0.81698915  | 3309418 | 0.40322209  | 2978149 | -0.39453131 | experimental | Sigma-Aldrich P 0618 | cis-(+)-8-OH-P821 hydrobromide; cis-8-Hydroxy-3-(n-j                                                |
| 3262 G05 | X | 553    | 560    | -0.76664974 | 512    | 520    | -0.92479147  | 3165911 | 1.1812925   | 3827207 | 0.65629345  | experimental | Sigma-Aldrich I 6504 | (-)-Isoproterenol hydrochloride; (-)-Isoprenaline hydroc                                            |
| 3262 G06 | X | 312    | 320    | -1.51719148 | 512    | 520    | -0.94168015  | 1893469 | -1.78650369 | 2246321 | -0.48471842 | experimental | Sigma-Aldrich L119   | L-701,606 oxalate salt hydrate; cis-2-(Diphenylmethyl)-                                             |
| 3262 G07 | X | 713    | 720    | -0.27194983 | 669    | 680    | -0.45226797  | 3201601 | 0.2364861   | 3597118 | 0.5330467   | experimental | Sigma-Aldrich I 8250 | 3-Iodo-L-tyrosine; S(-)-3-Iodo-4-hydroxyphenylalanine                                               |
| 3262 G08 | X | 713    | 720    | -0.27194983 | 673    | 680    | -0.43979887  | 3722480 | 1.04201099  | 3812471 | 0.85473217  | experimental | Sigma-Aldrich M 1559 | Moxonidine hydrochloride; BDF-5895                                                                  |
| 3262 G09 | X | 471    | 480    | -1.02018345 | 590    | 600    | -0.6985327   | 3331593 | 0.43751511  | 3396902 | 0.23276231  | experimental | Sigma-Aldrich I-117  | R(+)-IAA-94; R(+)-Methylindazole; Indanyloxyacetic ac                                               |
| 3262 G10 | X | 673    | 680    | -0.39562481 | 751    | 760    | -0.19665142  | 3264086 | 0.33311271  | 3529909 | 0.43265265  | experimental | Sigma-Aldrich M 2537 | Mevastatin; Compactin                                                                               |
| 3262 G11 | X | 551    | 560    | -0.77283349 | 871    | 880    | 0.17742158   | 3329550 | 0.43435567  | 3320586 | 0.11997455  | experimental | Sigma-Aldrich I-146  | IB-MECA; 1-Deoxy-1-[6-[[[3-iodophenyl]amino]oxy]methyl                                              |
| 3262 G12 | X | 673    | 680    | -0.07123249 | 626    | 640    | -0.07123249  | 3617686 | 0.8794998   | 3620446 | 0.26155302  | experimental | Sigma-Aldrich M 3127 | S-Methylisothiourea hemisulfate; Carbamimidohthioic ac                                              |
| 3262 G13 | X | 547    | 560    | -0.39871669 | 672    | 680    | -0.19353415  | 3542865 | 0.04280685  | 3269339 | 0.04350452  | experimental | Sigma-Aldrich K 1136 | Ketorolac tris salt; Toradol                                                                        |
| 3262 G14 | X | 792    | 800    | -0.02769175 | 672    | 680    | -0.44291615  | 3185000 | 0.21081311  | 3520069 | 0.41795046  | experimental | Sigma-Aldrich M 3808 | MRS 2179; 2'-Deoxy-N6-methyl adenosine 3',5'-diphosp                                                |
| 3262 G15 | X | 712    | 720    | -0.27504171 | 713    | 720    | -0.31510787  | 3799436 | 1.16102131  | 3554005 | 0.46864627  | experimental | Sigma-Aldrich L 0664 | loprofen; Kolox                                                                                     |
| 3262 G16 | X | 792    | 800    | -0.02769175 | 711    | 720    | -0.32134242  | 3468089 | 0.64860238  | 3961453 | 1.07727537  | experimental | Sigma-Aldrich M 4910 | 1-Methylhistamine dihydrochloride                                                                   |
| 3262 G17 | X | 469    | 480    | -1.0263672  | 790    | 800    | -0.0750777   | 3842348 | 1.22738352  | 3686676 | 0.66682476  | experimental | Sigma-Aldrich L 2906 | Lomefloxacin hydrochloride                                                                          |
| 3262 G18 | X | 1152   | 1160   | 1.08538304  | 1351   | 1360   | 1.67371358   | 3855726 | 1.24807223  | 4090991 | 1.27017641  | experimental | Sigma-Aldrich M 5501 | N6-Methyladenosine; 6-Methylaminopurine-9-ribofurano                                                |
| 3262 G19 | X | 950    | 960    | 0.46082441  | 828    | 840    | 0.04337875   | 3684843 | 0.98380642  | 3582384 | 0.51103765  | experimental | Sigma-Aldrich L 5783 | LiDocaine N-ethyl bromide quaternary salt; QX-314                                                   |
| 3262 G20 | X | 790    | 800    | -0.0338755  | 1071   | 1080   | 0.80087658   | 3843880 | 1.22975272  | 4258048 | 1.52031681  | experimental | Sigma-Aldrich M 6517 | alpha,beta-Methylene adenosine 5'-triphosphate dithiue                                              |
| 3262 G21 | X | 588    | 600    | -0.65843414 | 908    | 920    | 0.29276075   | 3075209 | 0.04102438  | 3466946 | 0.33860111  | experimental | Sigma-Aldrich L 9664 | Loratadine; 4-(8-chloro-5,6-dihydro-11H-benzo[5,6]cycl                                              |
| 3262 G22 | X | 987    | 1000   | 0.57522376  | 1083   | 1200   | 1.15001138   | 3438575 | 0.6029598   | 3676252 | 0.65125382  | experimental | Sigma-Aldrich M 7065 | MK-912; L-657,743 hydrochloride                                                                     |
| 3262 G23 | E | 1028   | 1600   | 0.70199061  | 1701   | 2400   | 2.76475983   | 70116   | -4.60626842 | 75812   | -4.72693568 | empty        |                      |                                                                                                     |
| 3262 G24 | P | 191657 | 192880 | 590.102921  | 233959 | 235480 | 726.776817   | 2803168 | -0.37967947 | 3075002 | -0.24686875 | empty        |                      |                                                                                                     |
| 3262 H01 | N | 595    | 600    | -0.63679102 | 595    | 600    | -0.68294632  | 2810462 | -0.3683995  | 3277930 | 0.05625676  | empty        |                      |                                                                                                     |
| 3262 H02 | E | 195    | 200    | -1.87354079 | 75     | 80     | -2.30392933  | 64768   | -4.61453896 | 71998   | -4.73263288 | experimental | Sigma-Aldrich M 8878 | 1-Methylimidazole; Methimazole                                                                      |
| 3262 H03 | X | 712    | 720    | -0.27504171 | 791    | 800    | -0.07196504  | 3526186 | 0.73844778  | 3876970 | 0.95107813  | experimental | Sigma-Aldrich N-153  | Nylidrin hydrochloride                                                                              |
| 3262 H04 | X | 592    | 600    | -0.64606664 | 952    | 960    |              |         |             |         |             |              |                      |                                                                                                     |

|          |   |        |        |              |        |        |             |         |             |         |             |              |                      |                                                            |
|----------|---|--------|--------|--------------|--------|--------|-------------|---------|-------------|---------|-------------|--------------|----------------------|------------------------------------------------------------|
| 3262 107 | X | 709    | 720    | -0.28431733  | 546    | 560    | -0.8356928  | 3060979 | 0.01901808  | 3590807 | 0.52361959  | experimental | Sigma-Aldrich C1618  | Cibenzoline succinate; 2-(2,2-diphenylcyclopropyl)-4,5-c   |
| 3262 108 | X | 913    | 920    | 0.34642505   | 752    | 760    | -0.19353415 | 3420513 | 0.57502742  | 3785713 | 0.81476217  | experimental | Sigma-Aldrich P20107 | CP-101537                                                  |
| 3262 109 | X | 391    | 400    | -1.2675334   | 872    | 880    | 0.18053885  | 2045560 | -1.55129918 | 2284013 | -1.42841566 | experimental | Sigma-Aldrich L-119  | Indatralin hydrochloride; Lu 19-005                        |
| 3262 110 | X | 713    | 720    | -0.27194983  | 632    | 640    | -0.56760715 | 3635934 | -0.90817001 | 3611311 | -0.55428080 | experimental | Sigma-Aldrich M 2547 | 8-Methoxy methyl-3-isobutyl-1-methylxanthine; 8-Meth       |
| 3262 111 | X | 831    | 840    | 0.09289135   | 871    | 680    | -0.44603345 | 3005748 | -0.06639513 | 2801338 | -0.65565681 | experimental | Sigma-Aldrich A0660  | Autrothiogluccose; 1-Thio-D-glucopyranose gold salt        |
| 3262 112 | X | 586    | 600    | -0.66461789  | 710    | 720    | -0.3244597  | 3266570 | 0.33695885  | 3163765 | -0.11427823 | experimental | Sigma-Aldrich M 3184 | MG 624; N,N,N-Triethyl-2-(4-trans-stibutyl)ethylam         |
| 3262 113 | X | 952    | 960    | 0.46700815   | 792    | 800    | -0.06884315 | 3232081 | 0.28362257  | 3241479 | 0.00180776  | experimental | Sigma-Aldrich K 1751 | Ketoprofen; 2-(3-Benzoyloxyphenyl)propionic acid           |
| 3262 114 | X | 831    | 840    | 0.09289135   | 872    | 680    | -0.44291615 | 3290578 | 0.37408655  | 3429982 | 0.2833858   | experimental | Sigma-Aldrich M 3935 | Meloxicam sodium; 4-Hydroxy-2-methyl-N-(5-methyl-2         |
| 3262 115 | X | 873    | 680    | -0.39562481  | 673    | 880    | 0.18365613  | 2871416 | -0.27413583 | 2978185 | -0.39149002 | experimental | Sigma-Aldrich L 1011 | Labetalol hydrochloride; 2-Hydroxy-5-(1-hydroxy-2-[(1-     |
| 3262 116 | X | 710    | 920    | -0.28122546  | 1010   | 920    | -0.28122546 | 3791049 | 1.14805104  | 3214827 | -0.03800391 | experimental | Sigma-Aldrich M 5154 | Moxisylyte hydrochloride; 4-Dimethylaminoethoxy-5-iso      |
| 3262 117 | X | 991    | 1000   | 0.58759126   | 1029   | 1040   | 0.66995103  | 3172436 | 0.19138323  | 3470483 | 0.34888453  | experimental | Sigma-Aldrich L 3791 | Lantrolin; GI 267119X; 6-(2,3-dichlorophenyl)-1,2,4-       |
| 3262 118 | X | 869    | 880    | 0.21038258   | 1066   | 1080   | 0.7852902   | 3802791 | 1.16620972  | 3815258 | 0.94422178  | experimental | Sigma-Aldrich M 5560 | (S)-2-Amino-2-methyl-4-phos                                |
| 3262 119 | X | 789    | 800    | -0.03696738  | 1105   | 1120   | 0.90686393  | 3304440 | 0.39552375  | 3460010 | 0.32824039  | experimental | Sigma-Aldrich A 6664 | 4-Aminodiphenylmethanesulfonyl fluoride hydrochloride;     |
| 3262 120 | X | 749    | 760    | -0.16064236  | 1399   | 1400   | 1.79217003  | 3529207 | 0.74311967  | 3866983 | 0.93615996  | experimental | Sigma-Aldrich M 6524 | Methoxamine hydrochloride                                  |
| 3262 121 | X | 1269   | 1280   | 1.44713235   | 1027   | 1040   | 0.66371648  | 3433537 | 0.59516867  | 3454421 | 0.31989178  | experimental | Sigma-Aldrich L 9756 | (-)-Tetramisole hydrochloride; Levamisole hydrochloride    |
| 3262 122 | X | 1064   | 1080   | 0.81329809   | 1183   | 1200   | 1.15001138  | 3342049 | 0.45368502  | 3770203 | 0.79159397  | experimental | Sigma-Aldrich M 7277 | (-)-3-(3,4-dihydroxyphenyl)-2-methyl-DL-alanine; DL-a      |
| 3262 123 | E | 1152   | 1800   | 1.08538304   | 1662   | 2440   | 2.6431861   | 66138   | -4.61242029 | 77874   | -4.72385555 | empty        |                      |                                                            |
| 3262 124 | P | 217700 | 219080 | 670.624607   | 260844 | 262400 | 810.584756  | 3090308 | 0.0639570   | 3431999 | 0.28639871  | empty        |                      |                                                            |
| 3262 101 | N | 875    | 880    | 0.22893382   | 595    | 600    | -0.68294632 | 2706758 | -0.52877485 | 2980056 | -0.38869519 | empty        |                      |                                                            |
| 3262 102 | E | 234    | 240    | -1.75295769  | 156    | 160    | -2.05143005 | 65843   | -4.6128765  | 72236   | -4.73227736 | empty        |                      |                                                            |
| 3262 103 | X | 671    | 680    | -0.40180856  | 472    | 480    | -1.06371115 | 3165883 | 0.1812492   | 3319585 | 0.11847929  | experimental | Sigma-Aldrich M 9020 | Mecamylamine hydrochloride                                 |
| 3262 104 | X | 910    | 920    | 0.33714943   | 631    | 680    | -0.44603342 | 226842  | -1.30188105 | 2462872 | -1.16124342 | experimental | Sigma-Aldrich S 8061 | SB 242084 dihydrochloride hydrate; 6-Chloro-2,3-dihyd      |
| 3262 105 | X | 1190   | 1200   | 1.20287427   | 1711   | 1320   | 1.54902258  | 3410741 | 0.55991529  | 3605040 | 0.54488922  | experimental | Sigma-Aldrich F 0030 | Fenobam; N-(3-Chlorophenyl)-N'-(4,5-dihydro-1-methyl       |
| 3262 106 | X | 668    | 680    | -0.41108418  | 818    | 880    | 0.16806975  | 3031336 | -0.02682399 | 3515514 | 0.41114999  | experimental | Sigma-Aldrich N-211  | NS 2028; 4H-8-Bromo-1,2,4-oxadiazolo[3,4-b]benz(b)         |
| 3262 107 | X | 1154   | 1160   | 1.09156679   | 1164   | 1120   | 0.9349194   | 3354174 | 0.472436    | 3651242 | 0.61389491  | experimental | Sigma-Aldrich D 0943 | DFB; 3,3'-Difluorobenzalazine                              |
| 3262 108 | X | 713    | 720    | -0.27194983  | 632    | 640    | -0.56760715 | 3635934 | -0.90817001 | 3611311 | -0.55428080 | experimental | Sigma-Aldrich M 2851 | Rxylbutynin Chloride; alpha-Phenylcyclohexanecylocl        |
| 3262 109 | X | 594    | 600    | -0.39258234  | 512    | 520    | -0.94168015 | 1091851 | 0.06677685  | 3038191 | 0.30185558  | experimental | Sigma-Aldrich Z 4626 | SN 39023 dihydrochloride; 3-(N-Benzyl-N'-N'-amin           |
| 3262 110 | X | 672    | 680    | -0.64066664  | 506    | 560    | -0.81387187 | 3007823 | -0.0631862  | 3670824 | 0.6431457   | experimental | Sigma-Aldrich T1     | Netrolapril; (2S,3aR,7aS)-1-[(2S)-2-[[[(1S)-1-(ethoxy      |
| 3262 111 | X | 1231   | 1240   | 1.32964112   | 952    | 960    | 0.42992085  | 3594559 | 0.84418472  | 3679053 | 0.65543708  | experimental | Sigma-Aldrich N 0630 | Niflumic acid; 2-(3-Trifluoromethyl)anilino]nicotinic ac   |
| 3262 112 | X | 831    | 840    | 0.09289135   | 872    | 800    | -0.06884315 | 2643410 | -0.62674077 | 3800159 | -0.34671684 | experimental | Sigma-Aldrich P 0547 | Pentamidine isethionate; 4'-[4-[[1,5-Pentanediyloxy]]b     |
| 3262 113 | X | 751    | 760    | -0.15445861  | 672    | 680    | -0.44291615 | 3005815 | -0.06629151 | 3346944 | 0.15934704  | experimental | Sigma-Aldrich N 3136 | Naltrexone hydrochloride; 17'-(Cyclopropylmethyl)-4,5-e    |
| 3262 114 | X | 673    | 680    | -0.39562481  | 473    | 480    | -1.06325387 | 1742266 | -2.02033492 | 1868639 | -2.04888429 | experimental | Sigma-Aldrich L 9793 | LP44; 4-[2-(Methylthio)phenyl]-N-(1,2,3,4-tetrahydrop      |
| 3262 115 | X | 232    | 240    | -1.75914144  | 153    | 160    | -2.06078187 | 1240901 | -2.79568196 | 1170545 | -3.09166846 | experimental | Sigma-Aldrich G6761  | Gossypol; 2,2'-bis(8-Formyl-1,6,7-trihydroxy-5-isoprop     |
| 3262 116 | X | 713    | 720    | -0.27194983  | 632    | 640    | -0.56760715 | 3635934 | -0.90817001 | 3611311 | -0.55428080 | experimental | Sigma-Aldrich P 2607 | Phenethane                                                 |
| 3262 117 | X | 750    | 760    | -0.15755048  | 827    | 840    | 0.04026148  | 3386321 | 0.52215044  | 3627725 | 0.57876618  | experimental | Sigma-Aldrich N 5751 | NG-Nitro-L-arginine methyl ester hydrochloride; L-NAME     |
| 3262 118 | X | 1189   | 1200   | 1.19978239   | 1668   | 1680   | 2.66188975  | 2724531 | -0.5012894  | 3198217 | -0.06281524 | experimental | Sigma-Aldrich P 4405 | Podophyllotoxin                                            |
| 3262 119 | X | 1550   | 1560   | 2.31594906   | 1507   | 1520   | 2.16000848  | 3373266 | 0.50196125  | 3636056 | 0.59121068  | experimental | Sigma-Aldrich M2199  | PMEE hydrate                                               |
| 3262 120 | X | 708    | 720    | -0.28740921  | 824    | 840    | 0.03090965  | 3297157 | 0.38426079  | 3152725 | -0.13076933 | experimental | Sigma-Aldrich P 5052 | Salpha-Pregnan-3alpha-ol-11,20-dione; Alfalanox            |
| 3262 121 | X | 829    | 840    | 0.0867076    | 1322   | 1120   | 0.91621575  | 2938764 | -0.16998402 | 3048717 | -0.28613121 | experimental | Sigma-Aldrich T 8703 | To070907; 2-Chloro-5-nitro-N-4-pyridinyl-benzamide, B      |
| 3262 122 | X | 947    | 960    | 0.45154878   | 1102   | 1120   | 0.8975121   | 1905710 | -1.76757332 | 1886100 | -0.20280711 | experimental | Sigma-Aldrich P 6402 | Perphenazine                                               |
| 3262 123 | E | 1600   | 1600   | 0.26803622   | 1999   | 1999   | 0.69370776  | 67857   | 0.609761    | 1470    | 0.73008306  | empty        |                      |                                                            |
| 3262 124 | E | 240655 | 241920 | 741.598985   | 310848 | 312280 | 966.460975  | 3370074 | 0.49707242  | 3769000 | 0.78979698  | empty        |                      |                                                            |
| 3262 K01 | N | 755    | 760    | -0.14209111  | 676    | 680    | -0.43044705 | 3031803 | -0.02610179 | 3305026 | 0.09673166  | empty        |                      |                                                            |
| 3262 K02 | E | 155    | 160    | -1.99721577  | 195    | 200    | -1.92985632 | 64387   | -4.61512816 | 80261   | -4.72028995 | empty        |                      |                                                            |
| 3262 K03 | X | 673    | 680    | -0.39562481  | 594    | 600    | -0.6860636  | 3065053 | 0.02531841  | 2886306 | -0.52873509 | experimental | Sigma-Aldrich I 4883 | (-)-Ibuprofen; alpha-Methyl-4-(isobutyl)phenylacetate ac   |
| 3262 K04 | X | 791    | 800    | -0.3078363   | 633    | 640    | -0.56448987 | 3149885 | 0.156500874 | 2895324 | -0.51526438 | experimental | Sigma-Aldrich L-121  | Levallorphan tartrate; 17'-(2-Propenyl)morphinan-3-ol t    |
| 3262 K05 | X | 1070   | 1080   | 0.83184934   | 711    | 720    | -0.32134242 | 2859774 | -0.29213986 | 3125421 | -0.17155492 | experimental | Sigma-Aldrich I 7378 | Indomethacin                                               |
| 3262 K06 | X | 640    | 650    | -0.5129979   | 564    | 560    | -0.81075046 | 3373633 | 0.5025268   | 3795248 | 0.82455238  | experimental | Sigma-Aldrich M 0814 | R(-)-MeS; 1-(2,6-Dimethylphenoxy)-3-methyl-2-butana        |
| 3262 K07 | X | 113    | 120    | -0.30161337  | 111    | 120    | -2.10170761 | 1093801 | -3.02316800 | 1168297 | -3.10955461 | experimental | Sigma-Aldrich M 8897 | Imverectin; MK-933                                         |
| 3262 K08 | X | 595    | 600    | -0.63679102  | 714    | 720    | -0.3119906  | 1540524 | -2.33232332 | 1681950 | -2.32775266 | experimental | Sigma-Aldrich B 1686 | BIO; (2Z,3E)-6-Bromindirubin-3'-oxime                      |
| 3262 K09 | X | 554    | 560    | -0.76355787  | 713    | 720    | -0.31510787 | 2949662 | -0.15313057 | 3349353 | 0.16294551  | experimental | Sigma-Aldrich I-120  | Iofetamine hydrochloride; N-Isopropyl-p-iodoamphetam       |
| 3262 K10 | X | 113    | 120    | -0.212707449 | 153    | 160    | -2.06078187 | 956609  | -3.23533164 | 960969  | -3.35225471 | experimental | Sigma-Aldrich M 2692 | MK-886; 3-[3-tert-Butylthio-1-(4-chlorobenzyl)-5-isop      |
| 3262 K11 | X | 672    | 680    | -0.39871669  | 594    | 600    | -0.6860636  | 2763577 | -0.44090585 | 2679547 | -0.8375832  | experimental | Sigma-Aldrich I-160  | 3-(1H-Imidazol-4-yl)propyl (p-fluorophenyl)methyl etf      |
| 3262 K12 | X | 592    | 600    | -0.64066664  | 672    | 480    | -1.06637115 | 3416055 | 0.56813325  | 3312065 | 0.10724623  | experimental | Sigma-Aldrich M 3262 | N-Methyl-D-aspartate acid; NMDA                            |
| 3262 K13 | X | 672    | 680    | -0.39871669  | 432    | 640    | -0.56760715 | 2940303 | -0.167604   | 3152426 | -0.13121596 | experimental | Sigma-Aldrich K 1888 | K 185; N-Butanoyl-2-(5,6,7-trihydro-11-methoxybenzo[       |
| 3262 K14 | X | 512    | 520    | -0.8934166   | 914    | 920    | 0.3114644   | 3074123 | 0.03934491  | 3120159 | -0.17941504 | experimental | Sigma-Aldrich M 4008 | Morin; 2,3,4,5,7-Pentahydroxyflavone                       |
| 3262 K15 | X | 593    | 600    | -0.64297477  | 391    | 400    | -1.31887042 | 1456383 | -2.46244504 | 1297423 | -2.90214331 | experimental | Sigma-Aldrich L 1415 | L-162,313; (5,7-dimethyl-2-ethyl-3-[4-[2-(n-butyl)oxca     |
| 3262 K16 | X | 752    | 760    | -0.15136673  | 952    | 960    | 0.42992085  | 3831937 | 1.2112832   | 3535474 | 0.440696542 | experimental | Sigma-Aldrich M 5171 | S-Methyl-L-thiocitrulline acetate; N5-[Imino(methylthio    |
| 3262 K17 | X | 552    | 560    | -0.76974162  | 591    | 800    | -0.07196042 | 3296364 | 0.38033404  | 3800405 | 0.83670848  | experimental | Sigma-Aldrich L 4376 | Methoxy-Lobeline hydrochloride; (-)-Lobeline hydrochloride |
| 3262 K18 | X | 671    | 680    | -0.40180856  | 588    | 600    | -0.70476725 | 3101265 | 0.08131926  | 3446244 | 0.30767731  | experimental | Sigma-Aldrich M 5644 | (-)-Methoxyverapamil hydrochloride; D606; Gallopamil       |
| 3262 K19 | X | 830    | 840    | 0.08979947   | 988    | 1000   | 0.54214275  | 3358531 | 0.47917398  | 3477981 | 0.35580874  | experimental | Sigma-Aldrich L 8401 | LE 300; 7-(Methyl-6,7,8,9,14,15-hexahydro-5H-benz[d]i      |
| 3262 K20 | X | 911    | 920    | 0.3402413    | 1350   | 1360   | 1.6705963   | 2201459 | -1.31020571 | 2613825 | -0.93575603 | experimental | Sigma-Aldrich M 6545 | Mitoxantrone; 1,4-Dihydroxy-5,8-bis[2-[[(-2-hydroxyeth     |
| 3262 K21 | X | 750    | 760    | -0.15755048  | 827    | 1040   | 0.66683375  | 2554131 | -0.76480826 | 2954291 | -0.42781819 | experimental | Sigma-Aldrich L 0878 | L-655,708; Ethyl (5)-11,12,13,13a-Tetrahydro-7-metho       |
| 3262 K22 | X | 1027   | 1040   | 0.69889874   | 1104   | 1120   | 0.903746675 | 3141136 | 0.14297865  | 3417529 | 0.26478402  | experimental | Sigma-Aldrich M 7684 | MRS 2159                                                   |
| 3262 K23 | E | 921    | 1560   | 0.37116005   | 1719   | 2400   | 2.82087078  | 65733   | -4.61304661 | 76477   | -4.72594233 | empty        |                      |                                                            |
| 3262 K24 | P | 214836 | 216200 | 661.769479   | 227557 | 229120 | 706.820023  | 2799534 | -0.38529935 | 3051602 | -0.28182271 | empty        |                      |                                                            |
| 3262 L01 | N | 635    | 640    | -0.51311604  | 635    | 640    | -0.55825532 | 2666013 | -0.59178586 | 3025349 | -0.32103387 | empty        |                      |                                                            |
| 3262 L02 | E | 155    | 160    | -1.99721577  | 195    | 240    | -1.80516532 | 61417   | -4.61972118 | 68654   | -4.73672801 | empty        |                      |                                                            |
| 3262 L03 | X | 793    | 800    | -0.02        |        |        |             |         |             |         |             |              |                      |                                                            |

|          |   |        |        |              |        |        |             |          |              |          |              |              |                       |                      |
|----------|---|--------|--------|--------------|--------|--------|-------------|----------|--------------|----------|--------------|--------------|-----------------------|----------------------|
| 3262 M01 | N | 715    | 720    | -0.26576609  | 756    | 760    | -0.18106505 | 2958036  | -0.14018041  | 3101882  | -0.20671651  | empty        |                       |                      |
| 3262 M02 | E | 194    | 200    | -1.87663266  | 154    | 160    | -2.0576664  | 59338    | -4.6229363   | 81945    | -4.71777446  | empty        |                       |                      |
| 3262 M03 | X | 1073   | 1080   | 0.84112496   | 875    | 880    | 0.18989068  | 2342359  | -1.09230778  | 2477083  | -1.14001562  | experimental | Sigma-Aldrich S0572   |                      |
| 3262 M04 | X | 720    | 720    | -0.27504171  | 512    | 520    | -0.94168015 | 3651292  | -0.91492073  | 3518201  | 0.41516372   | experimental | Sigma-Aldrich A 2355  |                      |
| 3262 M05 | X | 512    | 520    | 0.89341666   | 952    | 960    | 0.42992087  | 22017753 | -1.40872527  | 2202051  | -1.37159009  | experimental | Sigma-Aldrich I 73719 |                      |
| 3262 M06 | X | 512    | 520    | -0.8934166   | 632    | 640    | -0.56760715 | 3167599  | 0.18390295   | 3844009  | 0.90184234   | experimental | Sigma-Aldrich M 1022  |                      |
| 3262 M07 | X | 993    | 1000   | 0.59377501   | 751    | 760    | -0.19665142 | 2493569  | -0.85846571  | 2967500  | -0.40745083  | experimental | Sigma-Aldrich I 9531  |                      |
| 3262 M08 | X | 753    | 760    | -0.14827486  | 1033   | 1040   | 0.68242013  | 3321586  | 0.42203956   | 4073551  | 1.24472276   | experimental | Sigma-Aldrich M 1809  |                      |
| 3262 M09 | X | 552    | 560    | -0.76974162  | 670    | 680    | -0.4491507  | 2602004  | -0.690774    | 2929892  | -0.46362812  | experimental | Sigma-Aldrich I-122   |                      |
| 3262 M10 | X | 793    | 800    | -0.02459888  | 872    | 880    | 0.18053885  | 3713765  | 1.02853349   | 3578400  | 0.50508652   | experimental | Sigma-Aldrich M 2727  |                      |
| 3262 M11 | X | 832    | 840    | 0.09598322   | 712    | 720    | -0.31822515 | 2355546  | -0.79354945  | 2871668  | -0.505060074 | experimental | Sigma-Aldrich I18008  |                      |
| 3262 M12 | X | 713    | 720    | -0.27194983  | 593    | 600    | -0.68918087 | 3431899  | 0.59263595   | 3049586  | 0.48088762   | experimental | Sigma-Aldrich M 3281  |                      |
| 3262 M13 | X | 591    | 600    | -0.64915852  | 472    | 480    | -1.06637115 | 2325567  | -1.11827614  | 2404111  | -1.24901819  | experimental | Sigma-Aldrich K 2628  |                      |
| 3262 M14 | X | 594    | 600    | -0.63988289  | 475    | 480    | -1.05701932 | 3444780  | 0.61255566   | 3458692  | 0.32627162   | experimental | Sigma-Aldrich M 4145  |                      |
| 3262 M15 | X | 792    | 800    | -0.02769175  | 510    | 520    | -0.9479147  | 2670714  | -0.5845159   | 2530773  | -1.0598157   | experimental | Sigma-Aldrich C5493   |                      |
| 3262 M16 | X | 789    | 800    | -0.03696738  | 1351   | 1360   | 1.67371358  | 3436715  | 0.60008336   | 3725088  | 0.72420303   | experimental | Sigma-Aldrich M 5250  |                      |
| 3262 M17 | X | 670    | 680    | -0.40490044  | 548    | 560    | -0.82945825 | 2007659  | -1.60991202  | 2143451  | -1.6383814   | experimental | Sigma-Aldrich L 4762  |                      |
| 3262 M18 | X | 1467   | 1480   | 2.05932349   | 1627   | 1640   | 2.53408148  | 3268616  | 0.34012293   | 3613235  | 0.55712161   | experimental | Sigma-Aldrich M 5685  |                      |
| 3262 M19 | X | 2187   | 2200   | 4.28547308   | 1946   | 1960   | 3.52849221  | 2690527  | -0.99387564  | 3049586  | -0.28483413  | W            | experimental          | Sigma-Aldrich L 8533 |
| 3262 M20 | X | 867    | 880    | 0.20419883   | 1108   | 1120   | 0.91621575  | 3362951  | 0.48600939   | 4212672  | 1.4525356    | experimental | Sigma-Aldrich M 6628  |                      |
| 3262 M21 | X | 831    | 840    | 0.09289135   | 830    | 840    | 0.0496133   | 2373770  | -1.04373154  | 2853307  | -0.57843096  | experimental | Sigma-Aldrich L 9908  |                      |
| 3262 M22 | X | 1106   | 1120   | 0.94315682   | 1146   | 1160   | 1.0346722   | 1901420  | -1.77420768  | 1993653  | -1.86214351  | experimental | Sigma-Aldrich G 5793  |                      |
| 3262 M23 | E | 1170   | 1800   | 1.14103678   | 1217   | 1880   | 1.25599873  | 64653    | -4.6147168   | 75107    | -4.72798878  | empty        |                       |                      |
| 3262 M24 | P | 211586 | 212920 | 651.720887   | 221991 | 223400 | 689.466227  | 2494332  | -0.85728576  | 27222078 | -0.77405214  | empty        |                       |                      |
| 3262 N01 | N | 955    | 960    | 0.47628378   | 635    | 640    | -0.55825532 | 2342099  | -1.09270986  | 2381483  | -1.28281897  | empty        |                       |                      |
| 3262 N02 | E | 74     | 80     | -2.2476576   | 155    | 160    | -0.94547337 | 59982    | -4.62194037  | 81998    | -4.73711166  | empty        |                       |                      |
| 3262 N03 | X | 713    | 720    | -0.27194983  | 593    | 600    | -0.81387187 | 3157020  | -1.6754282   | 3436511  | -2.0931505   | experimental | Sigma-Aldrich M 9292  |                      |
| 3262 N04 | X | 632    | 640    | -0.52239166  | 592    | 600    | -0.69229815 | 2025354  | -1.5825472   | 2136899  | -1.64816851  | experimental | Sigma-Aldrich N-158   |                      |
| 3262 N05 | X | 753    | 760    | -0.14827486  | 992    | 1000   | 0.55461185  | 3377020  | 0.5077667    | 3845526  | 0.90370506   | experimental | Sigma-Aldrich M-105   |                      |
| 3262 N06 | X | 593    | 600    | -0.64297477  | 551    | 560    | -0.82010642 | 2788544  | -0.40229507  | 2741526  | -0.74500152  | experimental | Sigma-Aldrich O 0383  |                      |
| 3262 N07 | X | 513    | 520    | -0.89032472  | 713    | 720    | -0.31510787 | 3636500  | 0.90904531   | 3696570  | 0.68160401   | experimental | Sigma-Aldrich M-137   |                      |
| 3262 N08 | X | 232    | 240    | -1.75914144  | 511    | 520    | -0.94479742 | 2007757  | -1.60976047  | 2121769  | -1.67076909  | experimental | Sigma-Aldrich O 3125  |                      |
| 3262 N09 | X | 554    | 560    | -0.76355787  | 592    | 600    | -0.69229815 | 2719754  | -0.5086769   | 2924747  | -0.47133293  | experimental | Sigma-Aldrich P20117  |                      |
| 3262 N10 | X | 792    | 800    | -0.03696738  | 1351   | 1360   | 1.67371358  | 3436715  | 0.60008336   | 3725088  | 0.72420303   | experimental | Sigma-Aldrich Q 9637  |                      |
| 3262 N11 | X | 592    | 600    | -0.64606664  | 712    | 720    | -0.31822515 | 3437901  | 0.60191748   | 3702977  | 0.60191745   | experimental | Sigma-Aldrich N 1392  |                      |
| 3262 N12 | X | 671    | 680    | -0.40180856  | 671    | 680    | -0.44603342 | 2311460  | -1.14009222  | 2617212  | -0.93069667  | experimental | Sigma-Aldrich P 0667  |                      |
| 3262 N13 | X | 1074   | 1080   | 0.84421683   | 1114   | 1120   | 0.9349194   | 2275354  | -1.19592915  | 2326918  | -1.36432593  | experimental | Sigma-Aldrich N 3510  |                      |
| 3262 N14 | X | 152    | 160    | -0.200649139 | 271    | 280    | -1.69294342 | 826082   | -3.43718801  | 1028694  | -3.30355966  | experimental | Sigma-Aldrich P 1793  |                      |
| 3262 N15 | X | 512    | 520    | -0.8934166   | 832    | 840    | 0.05584785  | 2750009  | -0.46188838  | 3263499  | 0.03470033   | experimental | Sigma-Aldrich A 6605  |                      |
| 3262 N16 | X | 1672   | 1680   | 2.69315774   | 1474   | 1480   | 2.04466665  | 2110286  | -1.45122022  | 2500884  | -1.10446266  | experimental | Sigma-Aldrich A 0233  |                      |
| 3262 N17 | X | 540    | 560    | -0.90578409  | 592    | 600    | -0.95414932 | 2950510  | -0.151291916 | 3087591  | -0.24767545  | experimental | Sigma-Aldrich B 7261  |                      |
| 3262 N18 | X | 1023   | 1040   | 0.68853124   | 980    | 1000   | 0.52967665  | 1712156  | -1.35553745  | 2272758  | -1.38066479  | experimental | Sigma-Aldrich P 4509  |                      |
| 3262 N19 | X | 1786   | 1800   | 3.04563143   | 1627   | 1640   | 2.53408148  | 3798900  | 1.1601924    | 3550906  | 0.46401711   | experimental | Sigma-Aldrich N 8403  |                      |
| 3262 N20 | X | 867    | 880    | 0.20419883   | 826    | 840    | 0.0371442   | 2669845  | -0.58585978  | 2957665  | -0.42214195  | experimental | Sigma-Aldrich P 5295  |                      |
| 3262 N21 | X | 550    | 560    | -0.77592537  | 669    | 680    | -0.45226797 | 2340718  | -1.09484504  | 2110863  | -1.68706002  | experimental | Sigma-Aldrich S 6319  |                      |
| 3262 N22 | X | 1025   | 1040   | 0.69271499   | 864    | 880    | 0.15560065  | 2554181  | -0.76473354  | 2612904  | -0.93713178  | experimental | Sigma-Aldrich P 6503  |                      |
| 3262 N23 | E | 1157   | 1840   | 1.10084241   | 1633   | 2400   | 2.55278513  | 63273    | -4.61685093  | 73007    | -4.73112568  | empty        |                       |                      |
| 3262 N24 | P | 230195 | 231480 | 709.257578   | 258359 | 259800 | 802.638328  | 2629478  | 0.34145599   | 3497366  | 0.38404125   | empty        |                       |                      |
| 3262 O01 | N | 1075   | 1080   | 0.84733982   | 675    | 680    | -0.4335862  | 2464984  | -0.90267162  | 2960751  | -0.72532261  | empty        |                       |                      |
| 3262 O02 | E | 114    | 120    | -12.398262   | 195    | 200    | -1.92985632 | 58926    | -4.62357345  | 79054    | -4.72209292  | empty        |                       |                      |
| 3262 O03 | X | 714    | 720    | -0.26885796  | 634    | 640    | -0.5613726  | 2356349  | -1.07067263  | 2545896  | -1.03722558  | experimental | Sigma-Aldrich I 5627  |                      |
| 3262 O04 | X | 712    | 720    | -0.27504171  | 713    | 720    | -0.31510787 | 2760069  | -0.44633087  | 2823945  | -0.6218874   | experimental | Sigma-Aldrich L-131   |                      |
| 3262 O05 | X | 632    | 640    | -0.52239166  | 551    | 560    | -0.82010642 | 2964098  | -1.13080569  | 3168560  | -1.01711565  | experimental | Sigma-Aldrich I 7388  |                      |
| 3262 O06 | X | 632    | 640    | -0.52239166  | 832    | 840    | 0.05584785  | 2720293  | -0.50784335  | 3474869  | 0.35043616   | experimental | Sigma-Aldrich M 1275  |                      |
| 3262 O07 | X | 672    | 680    | -0.39871669  | 711    | 720    | -0.32134242 | 2794384  | -0.39326368  | 3200596  | -0.05926159  | experimental | Sigma-Aldrich S5572   |                      |
| 3262 O08 | X | 872    | 880    | 0.2196582    | 752    | 760    | -0.19333415 | 2984047  | -0.09995512  | 3229415  | -0.01621295  | experimental | Sigma-Aldrich F7932   |                      |
| 3262 O09 | X | 872    | 880    | 0.2196582    | 871    | 880    | 0.17421258  | 2504301  | -0.84186897  | 2763360  | -0.71238678  | experimental | Sigma-Aldrich S 8822  |                      |
| 3262 O10 | X | 552    | 560    | -0.76974162  | 631    | 640    | -0.57072442 | 2893807  | -0.23950877  | 2908706  | -0.49527489  | experimental | Sigma-Aldrich M 2776  |                      |
| 3262 O11 | X | 550    | 560    | -0.77592537  | 432    | 440    | -1.19106215 | 2440479  | -0.94056792  | 2460493  | -1.16479708  | experimental | Sigma-Aldrich P20137  |                      |
| 3262 O12 | X | 632    | 640    | -0.52239166  | 793    | 800    | -0.06572587 | 2737546  | -0.48116206  | 2912060  | -0.49026483  | experimental | Sigma-Aldrich M 7319  |                      |
| 3262 O13 | X | 712    | 720    | -0.27504171  | 710    | 720    | -0.3244597  | 2701756  | -0.5365103   | 2771219  | -0.70064733  | experimental | Sigma-Aldrich K 3375  |                      |
| 3262 O14 | X | 556    | 560    | -0.75737412  | 834    | 840    | 0.0620824   | 2783774  | -0.40967175  | 3004775  | -0.35177096  | experimental | Sigma-Aldrich R 8404  |                      |
| 3262 O15 | X | 112    | 120    | -2.13016637  | 311    | 320    | -1.56825242 | 848700   | -3.40209991  | 971599   | -3.3888518   | experimental | Sigma-Aldrich L 2037  |                      |
| 3262 O16 | X | 830    | 840    | 0.08979947   | 670    | 680    | -0.4491507  | 2882234  | -0.25740609  | 3417225  | 0.26432992   | experimental | Sigma-Aldrich M 5379  |                      |
| 3262 O17 | X | 668    | 680    | -0.41108418  | 1026   | 1040   | 0.6605992   | 2977256  | -0.11045721  | 3727663  | 0.72804946   | experimental | Sigma-Aldrich L 4900  |                      |
| 3262 O18 | X | 2029   | 2040   | 3.79695692   | 1869   | 1880   | 3.28846203  | 2993054  | -0.08602604  | 3511617  | 0.40532881   | W            | experimental          | Sigma-Aldrich M 6191 |
| 3262 O19 | X | 861    | 880    | 0.18564758   | 803    | 720    | -0.34628062 | 2693424  | -0.54939551  | 3066897  | -0.25897567  | experimental | Sigma-Aldrich L 8539  |                      |
| 3262 O20 | X | 1391   | 1400   | 1.82434103   | 1430   | 1440   | 1.9199783   | 2895758  | -0.2364916   | 3526300  | 0.42685836   | experimental | Sigma-Aldrich E4660   |                      |
| 3262 O21 | X | 667    | 680    | -0.41417605  | 1187   | 1200   | 1.16248048  | 2401213  | -1.0012917   | 3121973  | -0.1767054   | experimental | Sigma-Aldrich L-106   |                      |
| 3262 O22 | X | 1600   | 1620   | 4.30034842   | 1583   | 1600   | 1.55001138  | 3235073  | 2.28824961   | 3425517  | 0.27731367   | experimental | Sigma-Aldrich D 8941  |                      |
| 3262 O23 | X | 1047   | 1060   | 0.74218498   | 674    | 2480   | 2.6805934   | 62364    | -4.61819489  | 74188    | -4.7293155   | empty        |                       |                      |
| 3262 O24 | P | 227415 | 229080 | 700.662167   | 270377 | 272080 | 840.301739  | 2509324  | -0.83410104  | 2929328  | -0.4644706   | empty        |                       |                      |
| 3262 P01 | N | 796    | 800    | -0.01532426  | 878    | 880    | 0.1992425   | 2003567  | -1.61624210  | 2698860  | -0.80873424  | empty        |                       |                      |
| 3262 P02 | E | 196    | 200    | -1.87044892  | 155    | 160    | -2.05454732 | 57878    | -4.62519415  | 66892    | -4.74026001  | empty        |                       |                      |
| 3262 P03 | X | 596    | 600    | -0.63699114  | 676    | 680    | -0.43044705 | 2475803  | -0.88594034  | 2839093  | -0.59925994  | experimental | Sigma-Aldrich M 9440  |                      |
| 3262 P04 | X | 594    | 600    | -0.63988289  | 554    | 560    | -0.8107546  | 2606158  | -0.68434995  | 2912394  | -0.48976591  | experimental | Sigma-Aldrich B 2185  |                      |
| 3262 P05 | X | 674    | 680    | -0.39253294  | 634    | 640    | -0.5613726  | 2729492  | -0.49361735  | 3405922  | -0.29474596  | experimental | Sigma-Aldrich M-107   |                      |
| 3262 P06 | X | 954    | 960    | 0.09598322   | 954    | 960    | 0.43615505  | 2356149  | -0.59166849  | 2672316  | -0.84835833  | experimental | Sigma-Aldrich O 0877  |                      |
| 3262 P07 | X | 832    | 840    | 0.09598322   | 712    | 720</  |             |          |              |          |              |              |                       |                      |

|          |   |        |        |             |        |        |             |         |             |         |             |              |                                                         |                                                           |
|----------|---|--------|--------|-------------|--------|--------|-------------|---------|-------------|---------|-------------|--------------|---------------------------------------------------------|-----------------------------------------------------------|
| 3262 P19 | X | 1432   | 1440   | 1.95110788  | 753    | 760    | -0.19041687 | 2948947 | -0.15423629 | 3158910 | -0.12153043 | experimental | Sigma-Aldrich N 8534                                    | Nilotamide; Anandron                                      |
| 3262 P20 | X | 749    | 760    | -0.16064236 | 590    | 600    | -0.6985327  | 2887154 | -0.24979745 | 3190855 | -0.07381213 | experimental | Sigma-Aldrich P 5396                                    | Phosphomycin disodium; Fosfomycin; Phosphonomycin;        |
| 3262 P21 | X | 872    | 880    | 0.2196582   | 1191   | 1200   | 1.17494958  | 2854676 | -0.30002377 | 3261736 | 0.03206683  | experimental | Sigma-Aldrich N-142                                     | NO-711 hydrochloride; 1-(2-(((Diphenylmethylene)imin      |
| 3262 P22 | X | 1147   | 1160   | 1.06892367  | 1225   | 1240   | 1.28093663  | 2685504 | -0.56164357 | 3112126 | -0.11807068 | experimental | Sigma-Aldrich P 6628                                    | Pilocarpine nitrate                                       |
| 3262 P23 | E | 1862   | 2160   | 1.11630178  | 1868   | 2840   | 3.1445571   | 61371   | 6879232     | empty   | empty       | empty        | empty                                                   | empty                                                     |
| 3262 P24 | P | 341251 | 341920 | 1052.62878  | 324964 | 325760 | 1010.46443  | 2616298 | -0.66866873 | 2829325 | -0.61385097 | empty        | empty                                                   | empty                                                     |
| 3263 A01 | N | 998    | 1000   | 0.137622    | 1278   | 1280   | 0.72596522  | 2558055 | -0.81993735 | 4414834 | 2.04538558  | empty        | empty                                                   | empty                                                     |
| 3263 A02 | E | 154    | 160    | -1.0874187  | 193    | 200    | -1.19723885 | 67545   | -4.59586897 | 78638   | -4.48552597 | empty        | empty                                                   | empty                                                     |
| 3263 A03 | X | 828    | 840    | -0.1091279  | 911    | 920    | 0.07544366  | 2279563 | -1.24216683 | 2739775 | -0.47748519 | experimental | Sigma-Aldrich P 6656                                    | Promazine hydrochloride; 10-(3-[Dimethylamino]propyl      |
| 3263 A04 | X | 1697   | 1720   | 1.15219955  | 1135   | 1160   | 0.47249224  | 2921121 | -0.26948286 | 3359197 | 0.4554501   | experimental | Sigma-Aldrich R 0758                                    | Ritodrine hydrochloride; and N-(p-Hydroxyphenyl)-4-hydi   |
| 3263 A05 | X | 1351   | 1360   | 0.64999092  | 1313   | 1320   | 0.78800406  | 2953785 | -0.21996006 | 3531313 | 0.71468063  | experimental | Sigma-Aldrich P 7412                                    | Prezempine dihydrochloride; 5,11-Dihydro-11-              |
| 3263 A06 | X | 753    | 760    | -0.21798816 | 1074   | 1080   | 0.36436741  | 2956656 | -0.21560726 | 4197652 | 1.62250408  | experimental | Sigma-Aldrich P20102                                    | CP-93129 dihydrochloride hydrate                          |
| 3263 A07 | X | 512    | 520    | -0.56779243 | 874    | 880    | 0.00985974  | 1484881 | -2.44700636 | 2002616 | -1.58774871 | experimental | Sigma-Aldrich P20112                                    | PD-184161                                                 |
| 3263 A08 | X | 1275   | 1280   | 0.5396792   | 954    | 960    | 0.15166281  | 3182460 | 0.12674048  | 3992258 | 1.40892762  | experimental | Sigma-Aldrich R 8900                                    | Ro 8-4304; [4-[3-(4-fluorophenyl)-3,6-dihydro-2H-p        |
| 3263 A09 | X | 831    | 840    | -0.10477349 | 1032   | 1040   | 0.2899208   | 3314717 | 0.327259    | 3856958 | 1.20514709  | experimental | Sigma-Aldrich P 8782                                    | (Φ)-cis-Piperidine-2,3-dicarboxylic acid                  |
| 3263 A10 | X | 1112   | 1120   | 0.30308958  | 1071   | 1080   | 0.35904979  | 2746950 | -0.53354837 | 3217067 | 0.24138264  | experimental | Sigma-Aldrich R 108                                     | Ro 41-0960; 2'-Fluoro-3,4-dihydroxy-5-nitrobenzophenc     |
| 3263 A11 | X | 912    | 920    | 0.01279558  | 991    | 1000   | 0.21724673  | 3169755 | 0.10747807  | 3374824 | 0.47898653  | experimental | Sigma-Aldrich P 9233                                    | Piribedil maleate; 2-(4-[1,3-Benzodioxol-5-ylmethyl]-1-)  |
| 3263 A12 | X | 633    | 640    | -0.39216456 | 951    | 960    | 0.14634519  | 3116405 | 0.02659265  | 3634477 | 0.8700599   | experimental | Sigma-Aldrich R-140                                     | Ro 04-6790 dihydrochloride; 4-Amino-N-[2,6-bis(methy      |
| 3263 A13 | X | 755    | 760    | -0.21508522 | 1074   | 1080   | 0.36436741  | 2956656 | -0.21560726 | 4197658 | 0.121215    | experimental | Sigma-Aldrich P 9879                                    | Procaine hydrochloride; Novocaine hydrochloride           |
| 3263 A14 | X | 195    | 200    | -1.02790843 | 153    | 160    | -1.26814038 | 795940  | -3.49152901 | 848497  | -3.32601172 | experimental | Sigma-Aldrich A 6733                                    | Auranofin; SKF 39162; 1-Thio-Φ-D-glucopyranosatriet       |
| 3263 A15 | X | 515    | 520    | -0.56343802 | 716    | 720    | -0.27020131 | 3113726 | 0.02252304  | 3081681 | 0.03747258  | experimental | Sigma-Aldrich P-118                                     | Phlofenin; 3-Amino-2-(4-dihydroxy(1)propyl)phosphonic     |
| 3263 A16 | X | 915    | 920    | 0.01714999  | 553    | 560    | -0.55912505 | 3171815 | 0.1106103   | 3505098 | 0.67519721  | experimental | Sigma-Aldrich S 2501                                    | Spermidine trihydrochloride; N-(3-Aminopropyl)-1,4-but    |
| 3263 A17 | X | 1025   | 1040   | 0.17681169  | 1105   | 1120   | 0.41931609  | 3226232 | 0.19310443  | 3443251 | 0.58204706  | experimental | Sigma-Aldrich P-162                                     | Pregnenolone sulfate sodium; 5-Pregnen-3βeta-ol-20-or     |
| 3263 A18 | X | 3672   | 3680   | 0.418885285 | 4350   | 4360   | 6.17120292  | 1877468 | -1.85179426 | 1883394 | -1.76731355 | experimental | Sigma-Aldrich S7947                                     | Stattic; 6-Nitrobenzo[1]thiophene-1,1-dioxide             |
| 3263 A19 | X | 824    | 840    | -0.11493378 | 1141   | 1160   | 0.48312747  | 3293838 | 0.29560737  | 3716621 | 0.99578013  | experimental | Sigma-Aldrich P-233                                     | PD 168,077 maleate; N-[1-(2-Cyanophenyl)-1-piperazi       |
| 3263 A20 | X | 1260   | 1270   | 0.46777626  | 1572   | 1520   | 1.14079712  | 3209392 | 0.16839156  | 4493129 | 1.48929109  | experimental | Sigma-Aldrich V 8409                                    | Nitro-1,4-inhibitor 7-1; 2-(4-Morpholinyl)ethyl)-2-(3-nit |
| 3263 A21 | X | 550    | 560    | 0.51263657  | 710    | 720    | -0.28083654 | 1489079 | 0.45629238  | 1605286 | 2.1864827   | experimental | Sigma-Aldrich Q 3251                                    | Quinacrine dihydrochloride                                |
| 3263 A22 | X | 1150   | 1160   | 0.35824545  | 987    | 1000   | 0.21015657  | 3076927 | -0.03261320 | 3841138 | 1.18131998  | experimental | Sigma-Aldrich S 8010                                    | (Φ)-Sulpiride; (Φ)-5-(Aminosulfonyl)-N-[[1-ethyl-2-pyr    |
| 3263 A23 | E | 1371   | 2160   | 0.67902032  | 1689   | 2720   | 1.45447847  | 70037   | -4.59209078 | 73837   | -4.49275694 | empty        | empty                                                   | empty                                                     |
| 3263 A24 | P | 268008 | 268840 | 387.694634  | 351356 | 352440 | 621.252632  | 2275833 | -1.24782198 | 2139971 | -1.38087306 | empty        | empty                                                   | empty                                                     |
| 3263 B01 | N | 674    | 680    | -0.33265429 | 593    | 600    | -0.48822352 | 3075464 | -0.03547914 | 2247271 | -1.21926441 | empty        | empty                                                   | empty                                                     |
| 3263 B02 | E | 150    | 160    | -1.09322458 | 152    | 160    | -1.26991292 | 76849   | -4.58176291 | 78351   | -4.48595823 | empty        | empty                                                   | empty                                                     |
| 3263 B03 | X | 2378   | 2400   | 2.14065064  | 1856   | 1880   | 1.75049237  | 2903885 | -0.29561484 | 2955124 | -0.15313978 | experimental | Sigma-Aldrich S 8567                                    | SU 4312; 3-(4-Dimethylaminobenzylidene)-2-indolinon       |
| 3263 B04 | X | 600    | 620    | -0.19739948 | 627    | 640    | -0.79496395 | 1797195 | -0.0766905  | 1954259 | -1.13532307 | experimental | Sigma-Aldrich P20141                                    | PD-156; 2-(4-(4-Methoxyphenyl)-2-oxo-1-(3,4,5-1           |
| 3263 B05 | X | 736    | 760    | -0.24266315 | 655    | 680    | -0.37832615 | 3378320 | 0.42368928  | 3699499 | 0.96799203  | experimental | Sigma-Aldrich S-008                                     | 1-(2-Methoxyphenyl)piperazine hydrochloride; 2-MPP hy     |
| 3263 B06 | X | 632    | 640    | -0.39361603 | 632    | 640    | -0.41909453 | 3168674 | 0.10583914  | 3029429 | -0.04122616 | experimental | Sigma-Aldrich T 7947                                    | Tomoxetine; (R)-N-methyl-gamma-(2-methylphenoxy)-1        |
| 3263 B07 | X | 593    | 600    | -0.45022336 | 592    | 600    | -0.48999606 | 3761709 | 1.00495603  | 4057893 | 1.50778302  | experimental | Sigma-Aldrich S-154                                     | Sepiapterin; S(-)-2-Amino-7,8-dihydro-6-(2-hydroxy-1-     |
| 3263 B08 | X | 191    | 200    | -1.03371431 | 311    | 320    | -0.98807933 | 970969  | -3.22616266 | 1269622 | -2.65062158 | experimental | Sigma-Aldrich T 9262                                    | Tamoxifen citrate; (Z)-2-[4-(1,2-Diphenyl-1-butenyl)ph    |
| 3263 B09 | X | 593    | 600    | -0.45022336 | 871    | 880    | 0.00454213  | 3563502 | 0.70444887  | 4039983 | 1.48080808  | experimental | Sigma-Aldrich T 0410                                    | Triapiride hydrochloride; N-(2-[[Diethylamino]ethyl]-5-(m |
| 3263 B10 | X | 911    | 920    | 0.01134411  | 1110   | 1120   | 0.42817879  | 3240747 | 0.21511102  | 3193672 | 0.20614654  | experimental | Sigma-Aldrich T-122                                     | Telenzepine dihydrochloride; 4,9-Dihydro-3-methyl-4-(1-   |
| 3263 B11 | X | 900    | 910    | 0.04671463  | 1170   | 1180   | 0.07367111  | 3240746 | 0.38643196  | 447429  | 1.13532307  | experimental | Sigma-Aldrich T 1516                                    | Tiluxiphenil hydrochloride                                |
| 3263 B12 | X | 591    | 600    | -0.4531263  | 870    | 880    | 0.00276959  | 3325059 | 0.33093388  | 3108991 | 0.07860522  | experimental | Sigma-Aldrich U 4125                                    | Uridine 5'-diphosphate sodium; UDP                        |
| 3263 B13 | X | 902    | 1000   | 1.2891318   | 911    | 920    | 0.07544366  | 3554672 | 0.69106146  | 4222151 | 1.75517831  | experimental | Sigma-Aldrich T 2528                                    | Terbutaline hemisulfate; 2-T-Butylamino-1-(3,5-dihydro    |
| 3263 B14 | X | 432    | 440    | -0.68391003 | 593    | 600    | -0.48822352 | 3295103 | 0.29752167  | 3569957 | 0.77288384  | experimental | Sigma-Aldrich U-103                                     | U-69593; (+)-[Salpha,7alpha,beta)-N-Methyl-N-[7-(1-       |
| 3263 B15 | X | 593    | 600    | -0.45022336 | 590    | 600    | -0.49354114 | 3119109 | 0.03069226  | 2968911 | -0.13237465 | experimental | Sigma-Aldrich T 4182                                    | Uprhospin AG 1478; N-(3-Chlorophenyl)-6,7-dimethoxy       |
| 3263 B16 | X | 312    | 320    | -0.85808644 | 553    | 560    | -0.55912505 | 3198259 | 0.15069978  | 3704182 | 0.97504528  | experimental | Sigma-Aldrich U-116                                     | U-99194A maleate; 5-(6-Dimethoxy-2-(di-n-propylamino      |
| 3263 B17 | X | 440    | 440    | -0.8653615  | 230    | 240    | -1.13165493 | 1005327 | -3.17407154 | 1160751 | -2.85571396 | experimental | Sigma-Aldrich B9311                                     | BIX 01294 trihydrochloride hydrate; 2-(Hexahydro-4-m      |
| 3263 B18 | X | 631    | 640    | -0.00118392 | 826    | 840    | 0.11399948  | 3042282 | 0.0766905   | 3435305 | 0.13139237  | experimental | Sigma-Aldrich V 8879                                    | Vincristine sulfate; VCR                                  |
| 3263 B19 | X | 668    | 680    | -0.4313621  | 836    | 840    | -0.07522209 | 318130  | 0.48404633  | 3435305 | 0.57007922  | experimental | (Φ)-alpha-Lipic acid; (Φ)-1, 2-Dithiolane-3-pentanoic a |                                                           |
| 3263 B20 | X | 949    | 960    | 0.06649997  | 868    | 880    | -0.00077549 | 3383581 | 0.43166563  | 3451129 | 0.59391242  | experimental | Sigma-Aldrich W-104                                     | WIN 62,577; 17-beta-Hydroxy-17-alpha-ethyl-17-delta-4     |
| 3263 B21 | X | 950    | 960    | 0.06795144  | 788    | 800    | -0.14257855 | 2974894 | -0.18795612 | 3120150 | 0.09541222  | experimental | Sigma-Aldrich T 6764                                    | Triprolidine hydrochloride; (E)-2-[3-(1-Pyrrolidinyl)-1-p |
| 3263 B22 | X | 825    | 840    | -0.11348231 | 985    | 1000   | 0.2066115   | 3358265 | 0.39328334  | 3261168 | 0.30780486  | experimental | Sigma-Aldrich Y 3125                                    | Yohimbine hydrochloride; 17-Hydroxyyohimban-16-carb       |
| 3263 B23 | E | 1680   | 2520   | 1.12752456  | 1627   | 2720   | 1.34458109  | 72743   | -4.58798813 | 82054   | -4.480381   | empty        | empty                                                   | empty                                                     |
| 3263 B24 | P | 283758 | 285160 | 410.555287  | 369848 | 371680 | 654.030411  | 2805024 | -0.44550076 | 2678283 | -0.57010066 | empty        | empty                                                   | empty                                                     |
| 3263 C01 | N | 876    | 880    | -0.03945734 | 1116   | 1120   | 0.43881402  | 3126796 | 0.04234674  | 4840834 | 2.68700057  | empty        | empty                                                   | empty                                                     |
| 3263 C02 | E | 154    | 160    | -1.0874187  | 193    | 200    | -1.19723885 | 77464   | -4.58083049 | 84523   | -4.47666234 | empty        | empty                                                   | empty                                                     |
| 3263 C03 | X | 950    | 960    | 0.06795144  | 791    | 800    | -0.13726094 | 3081344 | -0.02656431 | 3804701 | 1.12549194  | experimental | Sigma-Aldrich P 6777                                    | Phenolazine sulfate                                       |
| 3263 C04 | X | 578    | 600    | -0.47199541 | 612    | 640    | -0.44745514 | 1269039 | -2.77425043 | 1521882 | -2.31180067 | experimental | Sigma-Aldrich R 1402                                    | Ranolazine hydrochloride; LY 139481                       |
| 3263 C05 | X | 633    | 640    | -0.39216456 | 512    | 520    | -0.63179912 | 3122318 | 0.03555571  | 3828660 | 1.16252638  | experimental | Sigma-Aldrich P 7505                                    | Putrescine dihydrochloride; Putrescine dihydrochloride    |
| 3263 C06 | X | 591    | 600    | -0.4531263  | 832    | 840    | -0.06458686 | 2020843 | -1.63441943 | 2697689 | -0.54087253 | experimental | Sigma-Aldrich R 5648                                    | Rottlerin; Mollitoxin                                     |
| 3263 C07 | X | 993    | 1000   | 0.13036465  | 992    | 1000   | 0.21901927  | 2988111 | -0.16791746 | 3370609 | 0.47182484  | experimental | Sigma-Aldrich P 8293                                    | Protoporphylin IX disodium; Kammerer's porphyrin          |
| 3263 C08 | X | 633    | 640    | -0.39216456 | 553    | 560    | -0.55912505 | 3524270 | 0.64496814  | 4155312 | 1.65450952  | experimental | Sigma-Aldrich R 9525                                    | RK 821002 hydrochloride; 2-[2-(2-Methoxy-1,4-benzodi      |
| 3263 C09 | X | 593    | 600    | -0.45022336 | 552    | 560    | -0.56089759 | 2232042 | -1.31421474 | 2725305 | -0.49968567 | experimental | Sigma-Aldrich P 9813                                    | Protriptyline hydrochloride                               |
| 3263 C10 | X | 432    | 440    | -0.68391003 | 632    | 640    | -0.41909453 | 3139514 | 0.06162885  | 2898663 | -0.23772602 | experimental | Sigma-Aldrich R 1115                                    | Reactive Blue 2; Basilen blue E-3G                        |
| 3263 C11 | X | 672    | 680    | -0.33555723 | 472    | 480    | -0.70270066 | 3366143 | 0.40522739  | 3164407 | 0.16206939  | experimental | Sigma-Aldrich P 9297                                    | Paromomycin sulfate                                       |
| 3263 C12 | X | 752    | 760    | -0.21943963 | 593    | 600    | -0.48822352 | 3530609 | 0.65457888  | 3645461 | 0.88660332  | experimental | Sigma-Aldrich S 0278                                    | (Φ)-Sotalol hydrochloride; N-(4-[1-Hydroxy-2-(isoprop     |
| 3263 C13 | X | 880    | 880    | -0.04816616 | 511    | 520    | -0.63357166 | 3612369 | 0.77853749  | 3054714 | -0.00314345 | experimental | Sigma-Aldrich P-101                                     | 2-Phenylaminoadenosine; CV-1808                           |
| 3263 C14 | X | 910    | 920    | 0.00989264  | 751    | 760    | -0.20816247 | 3845234 | 1.13159661  | 3647931 | 0.89032348  | experimental | Sigma-Aldrich S 1563                                    | SKF 86466; 6-Chloro-2,3,4,5-tetrahydro-3-methyl-1H-3      |
| 3263 C15 | X | 1271   | 1280   | 0.53387332  | 1551   | 1560   | 1.20986818  | 3085482 | -0.02029057 | 3147832 | 0.13710515  | experimental |                                                         |                                                           |





|          |   |        |        |             |        |        |             |          |             |         |             |              |                      |                                                            |  |
|----------|---|--------|--------|-------------|--------|--------|-------------|----------|-------------|---------|-------------|--------------|----------------------|------------------------------------------------------------|--|
| 3263 H07 | X | 832    | 840    | -0.10332202 | 352    | 360    | -0.91540525 | 4125318  | 1.55623377  | 3867202 | 1.22057597  | experimental | Sigma-Aldrich S-174  | SDZ-205,557 hydrochloride; 4-Amino-5-chloro-2-metho        |  |
| 3263 H08 | X | 671    | 680    | -0.3370087  | 632    | 640    | -0.41909453 | 3527186  | 0.64938917  | 3095796 | 0.05873173  | experimental | Sigma-Aldrich T-101  | THIP hydrochloride; Gaboxadol hydrochloride                |  |
| 3263 H09 | X | 711    | 720    | -0.2789499  | 750    | 760    | -0.20993501 | 3870808  | 1.17036406  | 3692814 | 0.9575235   | experimental | Sigma-Aldrich T 0891 | Tolbutamide                                                |  |
| 3263 H10 | X | 951    | 960    | 0.06940291  | 913    | 920    | 0.07898874  | 3138511  | 1.06010817  | 2703506 | -0.5311113  | experimental | Sigma-Aldrich A 8852 | A-68930 hydrochloride; cis-(*)-1-(Aminomethyl)-3,4-di      |  |
| 3263 H11 | X | 750    | 760    | -0.22234257 | 432    | 440    | -0.77560219 | 3660476  | 0.85147386  | 3301015 | 0.78050189  | experimental | Sigma-Aldrich T 1698 | Tetradecylthioacetic acid; TTA                             |  |
| 3263 H12 | X | 832    | 840    | -0.10332202 | 554    | 560    | -0.55735252 | 3640777  | 0.82160765  | 3105409 | 0.07321024  | experimental | Sigma-Aldrich U 6756 | U-73122; 1-[(6-[[17beta]-3-Methoxyestra-1,3,5(10)-tri      |  |
| 3263 H13 | X | 466    | 480    | -0.63456005 | 433    | 440    | -0.77182965 | 3204495  | 0.16014835  | 2871977 | -0.27837068 | experimental | Sigma-Aldrich T 3146 | Trimipramine maleate                                       |  |
| 3263 H14 | X | 2753   | 2760   | 0.26849519  | 872    | 880    | 0.00631467  | 3436354  | 0.51167625  | 3200665 | 0.21577528  | experimental | Sigma-Aldrich U-108  | SC-)-UH-301 hydrochloride; (S)-)-5-Fluoro-8-hydroxy-DP     |  |
| 3263 H15 | X | 466    | 480    | -0.63456005 | 711    | 720    | -0.279064   | 2087210  | -1.53379857 | 2010229 | -1.57628248 | experimental | Sigma-Aldrich T 4376 | N-p-Tosyl-L-phenylalanine chloromethyl ketone; TPCK        |  |
| 3263 H16 | X | 631    | 640    | -0.3950675  | 552    | 560    | -0.56089759 | 2928507  | -0.25828474 | 2690116 | -0.55227852 | experimental | Sigma-Aldrich V 4629 | (*)-Verapamil hydrochloride                                |  |
| 3263 H17 | X | 748    | 760    | -0.22524551 | 707    | 720    | -0.28615415 | 3570448  | 0.7149799   | 3370913 | 0.473059602 | experimental | Sigma-Aldrich P20138 | SC-51089 hydrate ; 8-Chloro-dibenz[b,f][1,4]oxazepine      |  |
| 3263 H18 | X | 751    | 760    | -0.2208917  | 830    | 840    | -0.06813194 | 3382257  | 0.42965828  | 3350119 | 0.49200406  | experimental | Sigma-Aldrich M0253  | L-Himosine from Koa hoale seeds; Leucenol, (S)-)-Amin      |  |
| 3263 H19 | X | 749    | 760    | -0.22379404 | 668    | 680    | -0.35528315 | 3576240  | 0.72376131  | 3302379 | 0.36987433  | experimental | Sigma-Aldrich T 6154 | Trazodone hydrochloride; 2-[3-[4-(3-Chlorophenyl)-1-pi     |  |
| 3263 H20 | X | 389    | 400    | -0.74632324 | 389    | 400    | -0.84982134 | 3257309  | 0.24022113  | 2973231 | -0.12586813 | experimental | Sigma-Aldrich A9480  | AC-55649; 4'-Octyl-4-biphenylcarboxylic acid, 4'-n-octyl   |  |
| 3263 H21 | X | 1071   | 1080   | 0.24357931  | 990    | 1000   | 0.21547419  | 3458146  | 0.54471571  | 3413083 | 0.53660988  | experimental | Sigma-Aldrich T 7165 | Tyrphostin 23; 3,4-(Dihydroxybenzylidene)malononitrile     |  |
| 3263 H22 | X | 975    | 1000   | 0.10423819  | 974    | 1000   | 0.18711358  | 3468806  | 0.56087763  | 3125036 | 0.10277122  | experimental | Sigma-Aldrich Z 0878 | Zaprinast; 1,4-Dihydro-5-(2-propoxyphenyl)-7H-1,2,3-t      |  |
| 3263 H23 | E | 1301   | 1960   | 0.57741742  | 1421   | 2040   | 0.9794382   | 76075    | -4.5829364  | 77934   | -4.48658629 | empty        |                      |                                                            |  |
| 3263 H24 | P | 221268 | 222520 | 0.31982925  | 207162 | 208760 | 0.365663243 | 3488341  | 0.58746293  | 3484306 | 0.64388158  | empty        |                      |                                                            |  |
| 3263 I01 | N | 1235   | 1240   | 0.4816204   | 836    | 840    | -0.05749671 | 3365888  | 0.40484078  | 4492973 | 2.46430143  | empty        |                      |                                                            |  |
| 3263 I02 | E | 193    | 200    | -1.03081137 | 234    | 240    | -1.12456478 | 76897    | -4.58169014 | 82472   | -4.47975143 | empty        |                      |                                                            |  |
| 3263 I03 | X | 627    | 640    | -0.40087338 | 669    | 680    | -0.35351061 | 3362524  | 0.39974053  | 3638110 | 0.87555137  | experimental | Sigma-Aldrich 218359 | (-)-Perillic acid; 4-Isopropenyl-1-cyclohexene-1-carboxy   |  |
| 3263 I04 | X | 1710   | 1720   | 1.17106866  | 1109   | 1120   | 0.42640625  | 3273908  | 0.26538734  | 3159277 | 0.1543429   | experimental | Sigma-Aldrich R 3255 | 15-cis-retinoic acid; Isotretinoin                         |  |
| 3263 I05 | X | 789    | 800    | -0.16573523 | 1071   | 1080   | 0.35904979  | 2994388  | -0.15840072 | 3066746 | 0.01497841  | experimental | Sigma-Aldrich P 6791 | Prazosin hydrochloride                                     |  |
| 3263 I06 | X | 551    | 560    | -0.5111851  | 511    | 520    | -0.63357166 | 3475157  | 0.57050656  | 3520228 | 0.69798508  | experimental | Sigma-Aldrich R 7150 | Ro 25-6981 hydrochloride; (R-[R*,S*])-alpha-(4-Hydrox      |  |
| 3263 I07 | X | 1028   | 1040   | 0.1811661   | 831    | 840    | -0.06635994 | 3372501  | 0.41486693  | 3299361 | 0.3653288   | experimental | Sigma-Aldrich P 8477 | Picotamide; 4-Methoxy-N,N'-bis(3-pyridinylmethyl)-1,3-     |  |
| 3263 I08 | X | 663    | 670    | -0.1531265  | 720    | 730    | -0.9094954  | 3210917  | -1.19493138 | 3019717 | -1.22676488 | experimental | Sigma-Aldrich R-1043 | Salphar; 6-[2-[4-bis(4-Fluorophenyl)methylene]-1-pi]       |  |
| 3263 I09 | X | 912    | 920    | 0.01279558  | 753    | 760    | -0.20461739 | 2407571  | 0.46803759  | 3251387 | 0.29388393  | experimental | Sigma-Aldrich P 8887 | Salphar; 6-[2-[4-bis(4-Fluorophenyl)methylene]-1-pi]       |  |
| 3263 I10 | X | 831    | 840    | -0.10477349 | 512    | 520    | -0.63179912 | 3667008  | 0.8613772   | 3201908 | 0.21855109  | experimental | Sigma-Aldrich R-121  | Salphar; 6-[2-[4-bis(4-Fluorophenyl)methylene]-1-pi]       |  |
| 3263 I11 | X | 673    | 680    | -0.33410576 | 514    | 520    | -0.62825405 | 3184827  | 0.10330215  | 2763327 | -0.44201262 | experimental | Sigma-Aldrich P 9547 | Prilocaine hydrochloride; N-(2-Methylphenyl)-2-(propyl     |  |
| 3263 I12 | X | 551    | 560    | -0.5111851  | 473    | 480    | -0.70092812 | 3587099  | 0.74022494  | 3122524 | 0.0989878   | experimental | Sigma-Aldrich S 0752 | (*)-Synephrine; 4-hydroxy-alpha-(methylamino)methyl        |  |
| 3263 I13 | X | 711    | 720    | -0.2789499  | 473    | 480    | -0.70092812 | 2624575  | -0.71908452 | 2313971 | -1.11880497 | experimental | Sigma-Aldrich P-105  | (*)-PPHT hydrochloride; (*)-2-(N-Phenylethyl)-N-prop       |  |
| 3263 I14 | X | 666    | 680    | -0.34426605 | 713    | 720    | -0.27551892 | 3576298  | 0.72384925  | 3276706 | 0.33120724  | experimental | Sigma-Aldrich T2952  | Tetrabenazine; 9,10-Dimethoxy-1,3,4,6,7,11b-hexahydr       |  |
| 3263 I15 | X | 592    | 600    | -0.45167483 | 592    | 600    | -0.48999606 | 3159983  | 0.08811409  | 2614587 | -0.66603565 | experimental | Sigma-Aldrich P-126  | Piprenone; R-47,465                                        |  |
| 3263 I16 | X | 948    | 960    | -0.45984835 | 744    | 750    | -0.36497394 | 3464964  | 0.70374387  | 3019319 | 0.49201764  | experimental | Sigma-Aldrich P20108 | Phenylbenzene-omega-phosphono-alpha-amino acid; PM         |  |
| 3263 I17 | X | 708    | 720    | -0.28330431 | 592    | 600    | -0.45984835 | 3159983  | 0.08811409  | 2614587 | -0.66603565 | experimental | Sigma-Aldrich P-126  | Piprenone; R-47,465                                        |  |
| 3263 I18 | X | 991    | 1000   | 0.12746171  | 1431   | 1440   | 0.99716358  | 3457846  | 0.54426087  | 3492971 | 0.56099125  | experimental | Sigma-Aldrich S 4250 | D-Serine; R(-)-2-Amino-3-hydroxypropionic acid             |  |
| 3263 I19 | X | 789    | 800    | -0.16573523 | 709    | 720    | -0.28260908 | 3231581  | 0.20121419  | 3096080 | 0.05915947  | experimental | Sigma-Aldrich Q 0875 | Quinidine sulfate                                          |  |
| 3263 I20 | X | 911    | 920    | 0.01134411  | 852    | 960    | 0.14811773  | 3243456  | 0.49212123  | 3426810 | 0.55728464  | experimental | Sigma-Aldrich S 7771 | (-)-Sulpiride; (-)-5-Aminosulfonyl-N-[(1-ethyl-2-pyrrolid  |  |
| 3263 I21 | X | 1018   | 1040   | 0.1666514   | 957    | 880    | -0.02027341 | 2843630  | -0.38696913 | 2715862 | -0.51350148 | experimental | Sigma-Aldrich Q-109  | Quipazine, 6-nitro-, maleate; 6-Nitro-2-(1-piperziny)-q    |  |
| 3263 I22 | X | 4426   | 4440   | 5.11326125  | 5025   | 5040   | 7.36766628  | 2345414  | -1.14232829 | 2671563 | -0.58022191 | experimental | Sigma-Aldrich I 7160 | IMS2186; 3-[1-(3-Hydroxy-4-methoxyphenyl)-meth-(E          |  |
| 3263 I23 | E | 1760   | 1760   | 0.45984835  | 744    | 750    | -0.36497394 | 3464964  | 0.70374387  | 3019319 | 0.49201764  | empty        |                      |                                                            |  |
| 3263 I24 | P | 17722  | 17840  | 255.921476  | 268340 | 269680 | 474.103592  | 13616227 | 0.10212819  | 3076805 | 0.03012865  | empty        |                      |                                                            |  |
| 3263 J01 | N | 633    | 640    | -0.39216456 | 715    | 720    | -0.27197385 | 2991754  | -0.1623942  | 2899034 | -0.23761909 | empty        |                      |                                                            |  |
| 3263 J02 | E | 192    | 200    | -1.03226284 | 192    | 200    | -1.19901138 | 77985    | -4.58004059 | 80434   | -4.48282094 | empty        |                      |                                                            |  |
| 3263 J03 | X | 1713   | 1720   | 1.17542307  | 1631   | 1640   | 1.35167125  | 3419673  | 0.48638572  | 3301165 | 0.36804588  | experimental | Sigma-Aldrich S 9186 | SIB 1757; 6-Methyl-2-(phenylazo)-3-pyridinol               |  |
| 3263 J04 | X | 542    | 560    | -0.52424833 | 1343   | 1360   | 0.84118021  | 2621432  | -0.72384971 | 2485088 | -0.86107908 | experimental | Sigma-Aldrich P0115  | PAC-1; (4-Benzylpiperazino)acetic acid (3-allyl-2-hydrox   |  |
| 3263 J05 | X | 870    | 880    | -0.04816616 | 507    | 520    | -0.64066182 | 3226144  | 0.19297101  | 3049786 | 0.10105657  | experimental | Sigma-Aldrich S-143  | (*)-6-Chloro-P8 hydrobromide; (*)-SKF-81297 hydrobri       |  |
| 3263 J06 | X | 948    | 960    | -0.45984835 | 744    | 750    | -0.36497394 | 3464964  | 0.70374387  | 3019319 | 0.49201764  | experimental | Sigma-Aldrich P20108 | Phenylbenzene-omega-phosphono-alpha-amino acid; PM         |  |
| 3263 J07 | X | 2189   | 2200   | 0.16663228  | 1591   | 1600   | 1.28859771  | 3913628  | 1.23184666  | 3749695 | 1.043597117 | experimental | Sigma-Aldrich S-1807 | SIB 20653; 3-(1-(3-Hydroxy-4-methoxyphenyl)-N-(3-pyridinyl |  |
| 3263 J08 | X | 588    | 600    | -0.45748071 | 669    | 680    | -0.35351061 | 2917908  | -0.27435418 | 2827755 | -0.34497513 | experimental | Sigma-Aldrich T-103  | Trifluoperidol hydrochloride; R 2498 hydrochloride; Triper |  |
| 3263 J09 | X | 712    | 720    | -0.27749843 | 552    | 560    | -0.56089759 | 3675936  | 0.87491319  | 3519515 | 0.69691121  | experimental | Sigma-Aldrich T 1132 | Tetraethylthiuram disulfide; Disulfur                      |  |
| 3263 J10 | X | 632    | 640    | -0.39361603 | 594    | 600    | -0.48645098 | 3195360  | 0.14629853  | 2822369 | -0.35308719 | experimental | Sigma-Aldrich H 9415 | SHPP-33 ; 5-Hydroxy-(2,6-disiropropylphenyl)-1H-isoind     |  |
| 3263 J11 | X | 312    | 320    | -0.85808644 | 473    | 480    | -0.70092812 | 3218045  | -0.18069189 | 3459651 | 0.60674774  | experimental | Sigma-Aldrich T 2057 | Trequinsin hydrochloride; HL 725                           |  |
| 3263 J12 | X | 912    | 920    | 0.01279558  | 773    | 880    | 0.00808721  | 2887398  | -0.32061124 | 2629901 | -0.64419062 | experimental | Sigma-Aldrich S 5317 | SKF 95282 dimaleate; N-[3-[3-(1-Piperidinylmethyl)ph       |  |
| 3263 J13 | X | 1232   | 1240   | 0.47726599  | 853    | 760    | -0.20461739 | 3564048  | 0.70527668  | 3535455 | 0.71954847  | experimental | Sigma-Aldrich P20123 | Avridine; CP 20961, N,N-Dioctadecyl-N,N'-bis(2-hydroxy     |  |
| 3263 J14 | X | 589    | 600    | -0.45602924 | 552    | 560    | -0.56089759 | 3563037  | 0.70374387  | 3013169 | -0.06571597 | experimental | Sigma-Aldrich N3288  | (+)-Norfluramine hydrochloride; JP 92, NSC 43036, t        |  |
| 3263 J15 | X | 912    | 920    | 0.01279558  | 593    | 600    | -0.48822352 | 3920718  | 1.24603401  | 3727057 | 1.10949482  | experimental | Sigma-Aldrich T 4425 | Trifluoperidol hydrochloride; R 2498 hydrochloride; Triper |  |
| 3263 J16 | X | 589    | 600    | -0.45602924 | 547    | 560    | -0.56976028 | 3306064  | 0.31413995  | 3043635 | -0.01982996 | experimental | Sigma-Aldrich P20130 | CP-64434 hydrate ; N'-Desmethylazithromycin hydrate        |  |
| 3263 J17 | X | 1512   | 1520   | 0.8836776   | 2552   | 2560   | 2.98417903  | 2916299  | -0.27679363 | 2772000 | -0.42894988 | experimental | Sigma-Aldrich T 5193 | Tyrphostin A6 698; Tyrphostin B5                           |  |
| 3263 J18 | X | 708    | 720    | -0.28330431 | 784    | 800    | -0.1496687  | 2895573  | -0.3082169  | 2686464 | -0.55777894 | experimental | Sigma-Aldrich W 1628 | Wortmannin from Penicillium funiculosum                    |  |
| 3263 J19 | X | 989    | 1000   | 0.12455877  | 791    | 800    | -0.13726094 | 3221319  | 0.18565569  | 2941453 | -0.1737302  | experimental | Sigma-Aldrich .      | Bay 61-3606 hydrochloride hydrochloride; 2-[[7-(3,4-Dimeth |  |
| 3263 J20 | X | 989    | 1000   | 0.12455877  | 629    | 640    | -0.42441214 | 3263515  | 0.24963022  | 3075555 | 0.02824598  | experimental | Sigma-Aldrich X 1251 | Xylazine hydrochloride; N-(2,6-Dimethylphenyl)-5,5-dih     |  |
| 3263 J21 | X | 988    | 1000   | 0.1231073   | 869    | 880    | 0.00999705  | 2174927  | -1.40080838 | 2079944 | -1.47128204 | experimental | Sigma-Aldrich P0122  | Pifflitrin-mu; PFTmu; 2-Propenyl-1-sulfonamide             |  |
| 3263 J22 | X | 857    | 880    | -0.06703527 | 975    | 1000   | 0.18888611  | 3105408  | 0.00991979  | 2987687 | -0.10409539 | experimental | Sigma-Aldrich Z 2001 | Zonisamide sodium; 1,2-Benzisoxazole-3-methanesulfon       |  |
| 3263 J23 | E | 1059   | 1640   | 0.22616167  | 1215   | 1960   | 0.61429531  | 75693    | -4.58351556 | 80212   | -4.48315553 | empty        |                      |                                                            |  |
| 3263 J24 | P | 195281 | 196360 | 282.133573  | 250440 | 252040 | 442.375156  | 3482425  | 0.58152577  | 3441508 | 0.57942187  | empty        |                      |                                                            |  |
| 3263 K01 | N | 1074   | 1080   | 0.24793372  | 716    | 720    | -0.27020131 | 3060839  | -0.05765251 | 4569179 | 2.27785052  | empty        |                      |                                                            |  |
| 3263 K02 | E | 192    | 200    | -1.03226284 | 114    | 120    | -1.33726937 | 78457    | -4.57932498 | 87689   | -4.47189391 | empty        |                      |                                                            |  |
| 3263 K03 | X | 1143   | 1160   | 0.34808816  | 904    | 92     |             |          |             |         |             |              |                      |                                                            |  |



|          |   |        |        |             |        |        |              |         |             |         |             |              |                      |                                                         |
|----------|---|--------|--------|-------------|--------|--------|--------------|---------|-------------|---------|-------------|--------------|----------------------|---------------------------------------------------------|
| 3263 O19 | X | 910    | 920    | 0.00989264  | 667    | 680    | -0.35705569  | 3457417 | 0.54361045  | 3293637 | 0.35670767  | experimental | Sigma-Aldrich Q 2128 | (+)-Quisqualic acid; L(+)-alpha-Amino-3,5-dioxo-1,2,4-  |
| 3263 O20 | X | 991    | 1000   | 0.12746171  | 1750   | 1760   | 1.56260331   | 3079806 | -0.02889611 | 3569253 | 0.77182352  | experimental | Sigma-Aldrich S 7936 | SB 205384; 4-Amino-7-hydroxy-2-methyl-5,6,7,8-tetra     |
| 3263 O21 | X | 909    | 920    | 0.00844117  | 1387   | 1400   | 0.9191719    | 3048098 | -0.0769695  | 3087599 | 0.04638591  | experimental | Sigma-Aldrich R 0500 | Cortexolone; 11-Deoxyoxycort                            |
| 3263 O22 | X | 1160   | 1160   | 0.35243957  | 1186   | 1200   | 0.5628917    | 3014860 | -0.12736255 | 3159787 | 0.15511103  | experimental | Sigma-Aldrich S 8502 | (-)-Scopolamine methyl bromide; Hyoscine methyl brom    |
| 3263 O23 | E | 955    | 1680   | 0.07520879  | 1985   | 1640   | 0.08253382   | 76874   | -4.98172501 | 1147860 | -4.43108207 | empty        |                      |                                                         |
| 3263 O24 | P | 243254 | 244800 | 351.764945  | 243506 | 245080 | 0.304.084375 | 2746720 | -0.53389708 | 2842446 | -0.32284845 | empty        |                      |                                                         |
| 3263 P01 | N | 837    | 840    | -0.09606467 | 718    | 720    | -0.26665623  | 2594649 | -0.76445616 | 2438437 | -0.93134194 | empty        |                      |                                                         |
| 3263 P02 | E | 73     | 80     | -1.20498777 | 115    | 120    | -1.33549683  | 72142   | -4.58889933 | 69729   | -4.49894415 | empty        |                      |                                                         |
| 3263 P03 | X | 1411   | 1440   | 0.73707912  | 675    | 680    | -0.34287538  | 2947558 | -0.22940099 | 2728811 | -0.49399849 | experimental | Sigma-Aldrich S-006  | Ketanserin tartrate; R 41468                            |
| 3263 P04 | X | 8986   | 9000   | 11.7319646  | 990    | 1000   | 0.21547419   | 3092972 | -0.00893477 | 2918374 | -0.20849037 | experimental | Sigma-Aldrich T 7883 | Trimethoprim                                            |
| 3263 P05 | X | 1010   | 1040   | 0.15503964  | 1074   | 1080   | 0.36436741   | 3095639 | -0.00489126 | 3022305 | -0.05195589 | experimental | Sigma-Aldrich S-153  | SQ 22536; 9-(Tetrahydro-2-furanyl)-9H-purin-6-amine     |
| 3263 P06 | X | 834    | 840    | -0.10041908 | 754    | 760    | -0.20284485  | 2690468 | -0.61918231 | 2589612 | -0.71027847 | experimental | Sigma-Aldrich I 2285 | IPA-3; 1,1-Diethyl-2-methylpiperazine-2-ol              |
| 3263 P07 | X | 591    | 600    | 0.4531263   | 711    | 720    | -0.279064    | 3130058 | 0.04729234  | 3140938 | 0.12672183  | experimental | Sigma-Aldrich T 0318 | Tranilast; SB-252218                                    |
| 3263 P08 | X | 1634   | 1640   | 1.06075694  | 1834   | 1840   | 1.71149652   | 3188102 | 0.13529447  | 2880471 | -0.26557754 | experimental | Sigma-Aldrich T-113  | 3-Tropanylindole-3-carboxylate methiodide               |
| 3263 P09 | X | 787    | 800    | -0.16863817 | 788    | 800    | -0.14257855  | 2966034 | -0.20138901 | 3026515 | -0.04561505 | experimental | Sigma-Aldrich T 1512 | Tetramisole hydrochloride; (±)-2,3,5,6-Tetrahydro-6-ph  |
| 3263 P10 | X | 2113   | 2120   | 1.75601108  | 1673   | 1680   | 1.42611786   | 1445713 | -2.50639005 | 1439730 | -2.43553296 | experimental | Sigma-Aldrich .      | CP-31398 dihydrochloride hydrate ; N'-2-[2-(4-Methox    |
| 3263 P11 | X | 749    | 760    | -0.22379404 | 751    | 760    | -0.20816247  | 3044436 | -0.08252156 | 3178015 | 0.18256493  | experimental | Sigma-Aldrich T 2408 | Zalamide                                                |
| 3263 P12 | X | 553    | 560    | -0.50828216 | 873    | 880    | 0.00808721   | 2520511 | -0.87685885 | 2654268 | -0.60627057 | experimental | Sigma-Aldrich U-101  | Urapidil, 5-Methyl-, 5-Methyl-6[[3-[4-(o-Methoxyphenyl  |
| 3263 P13 | X | 794    | 800    | -0.15847888 | 914    | 920    | 0.08076128   | 5950924 | -4.3240859  | 5934692 | 4.33450217  | experimental | Sigma-Aldrich T 4143 | Triamterene                                             |
| 3263 P14 | X | 754    | 760    | -0.21653669 | 555    | 560    | -0.55557998  | 2816435 | -0.42820023 | 2869200 | -0.28282433 | experimental | Sigma-Aldrich U-115  | U-101958 maleate; 1-Benzyl-4-aminomethyl-N-[(3'-isop    |
| 3263 P15 | X | 674    | 680    | -0.33265429 | 554    | 560    | -0.55735252  | 3088870 | -0.01515393 | 2958552 | -0.14797674 | experimental | Sigma-Aldrich T 4512 | (±)-Taxifolin; Dihydroquercetin                         |
| 3263 P16 | X | 554    | 560    | -0.50683069 | 673    | 680    | -0.34642046  | 2837640 | -0.39605073 | 2617304 | -0.66194347 | experimental | Sigma-Aldrich V 8261 | (±)-gamma-Vinyl GABA; Vigabatrin                        |
| 3263 P17 | X | 914    | 920    | 0.01569852  | 1233   | 1240   | 0.646201     | 2858102 | -0.36502773 | 2681252 | -0.56562893 | experimental | Sigma-Aldrich T 5568 | Tyrphostin AG 835; Tyrphostin B50                       |
| 3263 P18 | X | 954    | 960    | 0.07375732  | 1111   | 1120   | -0.279064    | 2452526 | -0.9799328  | 2168621 | -1.33772297 | experimental | Sigma-Aldrich P20121 | CP-135807 ;                                             |
| 3263 P19 | X | 672    | 680    | -0.33555723 | 713    | 720    | -0.4334964   | 2950501 | -0.22493903 | 3185760 | 0.194229927 | experimental | Sigma-Aldrich P20140 | EBPC ; 2,5-Dihydro-4-hydroxy-5-oxo-1-(phenylmethyl)     |
| 3263 P20 | X | 852    | 860    | -0.10322678 | 859    | 860    | -0.10322678  | 2477877 | -0.9401261  | 3159787 | 0.15511103  | experimental | Sigma-Aldrich P20143 | PCO-008671 ; 2-((4-(5-Ethylpiperidin-4-yl)piiperazin-1- |
| 3263 P21 | X | 1071   | 1080   | -0.35793931 | 1070   | 1080   | 0.35797725   | 2821489 | -0.42053772 | 3058177 | 0.00202702  | experimental | Sigma-Aldrich T 7314 | 1-[2-(Trifluoromethyl)phenyl]imidazole; TRIM            |
| 3263 P22 | X | 1307   | 1320   | 0.58612624  | 987    | 1000   | 0.21015657   | 2740579 | -0.54320762 | 2575870 | -0.72434882 | experimental | Sigma-Aldrich Z-101  | Zimeldine dihydrochloride; (Z)-3-(4-Bromophenyl)-N,N-   |
| 3263 P23 | E | 1517   | 2400   | 0.89093495  | 1225   | 2080   | 0.63202069   | 70091   | -4.59200889 | 76593   | -4.48860602 | empty        |                      |                                                         |
| 3263 P24 | P | 301164 | 301880 | 435.819574  | 292084 | 292800 | 516.190742   | 2476520 | -0.94355483 | 2864122 | -0.29020139 | empty        |                      |                                                         |
| 3264 A01 | N | 518    | 520    | -0.40380193 | 878    | 880    | 0.05514541   | 2927214 | -1.39038573 | 3606833 | 0.40517785  | empty        |                      |                                                         |
| 3264 A02 | E | 116    | 120    | -0.80057641 | 34     | 40     | -1.40067961  | 91895   | -4.34426024 | 2083513 | -0.98889242 | empty        |                      |                                                         |
| 3264 A03 | X | 916    | 920    | -0.01097545 | 1113   | 1120   | 0.46049953   | 2937633 | -0.52479443 | 3654202 | 0.44852771  | experimental | MicroSource          | ALLYLTHIOUREA                                           |
| 3264 A04 | X | 709    | 720    | -0.11527678 | 1550   | 1560   | -0.21428575  | 2976865 | -0.87895037 | 3986637 | 0.63302807  | experimental | MicroSource          | MALATHION                                               |
| 3264 A05 | X | 2332   | 2240   | 1.28791812  | 1190   | 1200   | 0.59331769   | 2784934 | -0.72974253 | 2734735 | -0.39292491 | experimental | MicroSource          | TIRATRICOL                                              |
| 3264 A06 | X | 1470   | 1480   | 0.53582321  | 631    | 640    | -0.37090765  | 2719254 | -0.8178963  | 3387814 | 0.20474204  | experimental | MicroSource          | ITOPRIDE HYDROCHLORIDE                                  |
| 3264 A07 | X | 709    | 720    | -0.2152847  | 793    | 800    | -0.09147204  | 3300985 | -0.03711406 | 99352   | -2.80470253 | experimental | MicroSource          | PIPERONYL BUTOXIDE                                      |
| 3264 A08 | X | 1833   | 1840   | 0.89410464  | 712    | 720    | -0.23118984  | 2673851 | -0.87883487 | 3291234 | 0.1163566   | experimental | MicroSource          | DIMETRIDAZOLE                                           |
| 3264 A09 | X | 951    | 960    | 0.02356959  | 1233   | 1240   | 0.66748887   | 3247889 | -0.10837795 | 3453777 | 0.26510825  | experimental | MicroSource          | CARGLUMIC ACID                                          |
| 3264 A10 | X | 713    | 720    | -0.21133667 | 830    | 840    | -0.02765033  | 2843549 | -0.6510712  | 95365   | -2.80835124 | experimental | MicroSource          | NICOPHOLINE                                             |
| 3264 A11 | X | 1000   | 1000   | 0.06997678  | 830    | 840    | -0.02765033  | 3174443 | -0.56565981 | 3292231 | 0.08428522  | experimental | MicroSource          | DIFLOXALIN HYDROCHLORIDE                                |
| 3264 A12 | X | 834    | 840    | -0.09190955 | 632    | 640    | -0.36493274  | 2944232 | -0.51593744 | 3990206 | 0.75785259  | experimental | MicroSource          | SORBITOL                                                |
| 3264 A13 | X | 1034   | 1040   | 0.10549069  | 832    | 840    | -0.0242005   | 3052807 | -0.37021127 | 3450739 | 0.26232802  | experimental | MicroSource          | DEXFOSFOSERINE                                          |
| 3264 A14 | X | 633    | 640    | -0.29029679 | 1034   | 1040   | 0.32423155   | 2936716 | -0.5260252  | 3382753 | 0.200111045 | experimental | MicroSource          | PAROXYPROPRIONE                                         |
| 3264 A15 | X | 954    | 960    | 0.02653059  | 672    | 680    | -0.30018629  | 3163061 | -0.2222316  | 3502387 | 0.30959382  | experimental | MicroSource          | THYMOPENTIN                                             |
| 3264 A16 | X | 952    | 960    | 0.02455659  | 911    | 920    | 0.11206748   | 3289406 | -0.05265506 | 3435386 | 0.24827768  | experimental | MicroSource          | OXINIAIC ACID                                           |
| 3264 A17 | X | 1231   | 1240   | 0.29992992  | 1592   | 1600   | 1.28673198   | 3315668 | -0.01740697 | 3415096 | 0.22970923  | experimental | MicroSource          | BENZOCICLINE                                            |
| 3264 A18 | X | 1112   | 1120   | 0.18247678  | 830    | 840    | -0.02765033  | 3174443 | -0.56565981 | 3292231 | 0.08428522  | experimental | MicroSource          | PROCOXAZOLE                                             |
| 3264 A19 | X | 832    | 840    | -0.09387855 | 1153   | 1160   | 0.52495998   | 2201992 | -0.16592354 | 3950866 | 0.17758036  | experimental | MicroSource          | DARIFENACIN HYDROBROMIDE                                |
| 3264 A20 | X | 711    | 720    | -0.2133107  | 752    | 760    | -0.1621934   | 3208239 | -0.16159502 | 4239607 | 0.98426262  | experimental | MicroSource          | NITARSONE                                               |
| 3264 A21 | X | 1153   | 1160   | 0.22294383  | 913    | 920    | 0.1155173    | 3420925 | 0.12386588  | 3093400 | -0.0646917  | experimental | MicroSource          | MEPARYLON                                               |
| 3264 A22 | X | 1031   | 1040   | 0.10252968  | 952    | 960    | 0.18278884   | 2874083 | -0.01608937 | 3712464 | 0.50184633  | experimental | MicroSource          | PICOLAMINE                                              |
| 3264 A23 | E | 641    | 1000   | -0.28240078 | 782    | 1160   | -0.11044606  | 94765   | -4.34040821 | 91008   | -2.81233856 | empty        |                      |                                                         |
| 3264 A24 | P | 121959 | 122240 | 119.45861   | 128321 | 128720 | 219.882999   | 2860049 | -0.62892539 | 4047987 | 0.80890108  | empty        |                      |                                                         |
| 3264 B01 | N | 476    | 480    | -0.44525598 | 714    | 720    | -0.22774002  | 2594128 | -0.98583673 | 2972653 | -0.17519363 | empty        |                      |                                                         |
| 3264 B02 | E | 76     | 80     | -0.84005646 | 36     | 40     | -1.39722979  | 98567   | -4.33530528 | 2980637 | -0.16788705 | empty        |                      |                                                         |
| 3264 B03 | X | 634    | 640    | -0.28930979 | 671    | 680    | 0.3019112    | 2486280 | -1.13058714 | 2202666 | -0.87984924 | experimental | MicroSource          | ISOWALERAMIDE                                           |
| 3264 B04 | X | 513    | 520    | -0.40873693 | 1267   | 1280   | 0.72613585   | 3133048 | -0.26251416 | 3968194 | 0.73587831  | experimental | MicroSource          | QUINAPRILAT                                             |
| 3264 B05 | X | 427    | 440    | -0.49361904 | 1348   | 1360   | 0.86585366   | 2716665 | -0.82137118 | 3824810 | 0.60466007  | experimental | MicroSource          | IMEXON                                                  |
| 3264 B06 | X | 631    | 640    | -0.29227079 | 989    | 1000   | 0.24661055   | 3789432 | 0.61846513  | 4371869 | 1.10530254  | experimental | MicroSource          | BETAXALOL HYDROCHLORIDE                                 |
| 3264 B07 | X | 628    | 640    | -0.2952318  | 1069   | 1080   | 0.38460344   | 2817229 | -0.68639713 | 3805657 | 0.58713215  | experimental | MicroSource          | CINOCITRAMIDE                                           |
| 3264 B08 | X | 830    | 840    | -0.09585756 | 591    | 600    | -0.43990409  | 2602865 | -0.97411019 | 4024242 | 0.78717078  | experimental | MicroSource          | ERYTHROMYCIN STEARATE                                   |
| 3264 B09 | X | 511    | 520    | -0.41071094 | 708    | 720    | -0.23808949  | 3322310 | -0.00849228 | 3234112 | 0.064081263 | experimental | MicroSource          | MELGLUTOL                                               |
| 3264 B10 | X | 314    | 320    | -0.60515017 | 832    | 840    | -0.0242005   | 2000704 | -1.78231296 | 3400953 | 0.21676623  | experimental | MicroSource          | FENOLDIPAM MESYLATE                                     |
| 3264 B11 | X | 194    | 200    | -0.72359032 | 630    | 640    | -0.37263256  | 1822259 | -0.02181659 | 97677   | -2.80623541 | experimental | MicroSource          | TIOPRONIN                                               |
| 3264 B12 | X | 193    | 200    | -0.72457732 | 512    | 520    | -0.57617208  | 1993385 | -1.79213631 | 4446721 | 1.21040964  | experimental | MicroSource          | TERPENE HYDRATE                                         |
| 3264 B13 | X | 433    | 440    | -0.48769703 | 1153   | 1160   | 0.52949598   | 1647270 | -2.25668168 | 2999973 | -0.15019166 | experimental | MicroSource          | TOLONIUM CHLORIDE                                       |
| 3264 B14 | X | 392    | 400    | -0.52816408 | 629    | 640    | -0.37435747  | 2736556 | -0.79467406 | 91248   | -2.81211892 | experimental | MicroSource          | SODIUM MONOFLUOROPHOSPHATE                              |
| 3264 B15 | X | 426    | 440    | -0.49460604 | 705    | 720    | -0.24326422  | 2709757 | -0.83064289 | 2971512 | -0.17623789 | experimental | MicroSource          | TRICLOSENE POTASSIUM                                    |
| 3264 B16 | X | 591    | 600    | -0.31750678 | 830    | 840    | -0.02765033  | 3174443 | -0.56565981 | 3292231 | 0.08428522  | experimental | MicroSource          | BENZYL ALCOHOL                                          |
| 3264 B17 | X | 871    | 880    | -0.05539051 | 1108   | 1120   | 0.45187498   | 3688320 | -0.48275558 | 3716130 | 0.50520102  | experimental | MicroSource          | TRICLOSENE                                              |
| 3264 B18 | X | 670    | 680    | -0.25377775 | 790    | 800    | -0.09664677  | 3846683 | 0.69530574  | 3313999 | 0.13719005  | experimental | MicroSource          | GUANIDINE HYDROCHLORIDE                                 |
| 3264 B19 | X | 829    | 840    | -0.09684456 | 790    | 800    | -0.09664677  | 3963952 | 0.85270074  | 3563352 | 0.3653863   | experimental | MicroSource          | ETHANOLAMINE OLEATE                                     |
| 3264 B20 | X | 1266   | 1280   | 0.33447496  | 785    | 800    | -0.10527133  |         |             |         |             |              |                      |                                                         |

|          |   |       |       |             |       |       |             |         |              |          |             |              |             |          |                             |
|----------|---|-------|-------|-------------|-------|-------|-------------|---------|--------------|----------|-------------|--------------|-------------|----------|-----------------------------|
| 3264 C13 | X | 711   | 720   | -0.2133107  | 472   | 480   | -0.64516852 | 3523850 | 0.26200878   | 3353166  | 0.17303383  | experimental | MicroSource | 01502345 | URACIL                      |
| 3264 C14 | X | 1267  | 1280  | 0.33546197  | 707   | 720   | -0.2398144  | 3247208 | -0.10929197  | 3260613  | 0.08833371  | experimental | MicroSource | 01301024 | D-(+)-MALTOSE               |
| 3264 C15 | X | 2790  | 2800  | 1.83866478  | 2831  | 2840  | 3.42389692  | 3840443 | 0.68693059   | 97882    | -2.8060478  | experimental | MicroSource | 01506199 | MEXENONE                    |
| 3264 C16 | X | 826   | 840   | -0.09805556 | 624   | 640   | -0.38298203 | 3355270 | 0.0362253    | 3653799  | 0.36579517  | experimental | MicroSource | 01506556 | TRILLOSTANE                 |
| 3264 C17 | X | 748   | 760   | -0.17879165 | 910   | 920   | 0.11034257  | 3855851 | 0.70761076   | 3304386  | 0.12839269  | experimental | MicroSource | 01502551 | DOBROBUTANOL                |
| 3264 C18 | X | 711   | 720   | -0.2133107  | 671   | 680   | -0.3019112  | 3529056 | 0.26899612   | 93391    | -2.81015775 | experimental | MicroSource | 01503320 | TIMONACIC                   |
| 3264 C19 | X | 986   | 1000  | 0.05811463  | 705   | 720   | -0.24326422 | 3858840 | 0.7116225    | 3588369  | 0.38828047  | experimental | MicroSource | 01506176 | PIMAGEDINE HYDROCHLORIDE    |
| 3264 C20 | X | 2431  | 2480  | 1.48433136  | 2118  | 2840  | 3.40147307  | 3394029 | 0.08776686   | 3820994  | 0.60116785  | experimental | MicroSource | 01504286 | FEBUXOSTAT                  |
| 3264 C21 | X | 865   | 880   | -0.06131251 | 2805  | 1120  | 0.44670024  | 5275377 | 2.61285679   | 3648699  | 0.44349163  | experimental | MicroSource | 01504305 | PROFLAVINE HEMISULFATE      |
| 3264 C22 | X | 1231  | 1240  | 0.29992992  | 629   | 640   | -0.37435747 | 3144443 | -0.24722013  | 3700561  | 0.49095327  | experimental | MicroSource | 01505497 | SOLIFENACIN SUCCINATE       |
| 3264 C23 | E | 379   | 600   | -0.54099509 | 635   | 920   | -0.364008   | 99110   | -4.33457648  | 2681273  | -0.4418508  | empty        |             |          |                             |
| 3264 C24 | P | 73050 | 73560 | 71.1853667  | 95794 | 96400 | 163.775814  | 3450607 | 0.16370418   | 4040405  | 0.80180224  | empty        |             |          |                             |
| 3264 D01 | N | 277   | 280   | -0.64166922 | 1273  | 1280  | 0.73648532  | 1545029 | -2.39390654  | 3377019  | 0.19486297  | empty        |             |          |                             |
| 3264 D02 | E | 38    | 40    | -0.8775625  | 73    | 80    | -1.33340808 | 96215   | -4.33846207  | 2717100  | -0.40906362 | empty        |             |          |                             |
| 3264 D03 | X | 355   | 360   | -0.56468312 | 913   | 920   | 0.1155173   | 2082804 | -1.67212076  | 3970787  | 0.7382513   | experimental | MicroSource | 01503870 | VALGANICLOVIR HYDROCHLORIDE |
| 3264 D04 | X | 314   | 320   | -0.60515017 | 868   | 880   | 0.0378963   | 2434287 | -1.20037062  | 3796362  | 0.57862581  | experimental | MicroSource | 01506164 | IDRAMANTONE                 |
| 3264 D05 | X | 471   | 480   | -0.45019098 | 1350  | 1360  | 0.86930348  | 2932915 | -0.53112679  | 31116737 | -0.04333478 | experimental | MicroSource | 01503875 | PROCTONE OLAMINE            |
| 3264 D06 | X | 835   | 840   | -0.09092255 | 788   | 800   | -0.1009966  | 3115501 | -0.28606523  | 3352543  | 0.17246369  | experimental | MicroSource | 01506103 | ALLYLSIOTHIOCYANATE         |
| 3264 D07 | X | 386   | 400   | -0.53408609 | 1148  | 1160  | 0.52087143  | 3093807 | -0.31518228  | 2410757  | -0.68941422 | experimental | MicroSource | 01503831 | DROSPIRONONE                |
| 3264 D08 | X | 1192  | 1200  | 0.26143688  | 1032  | 1040  | 0.32078173  | 3584334 | 0.34318863   | 3556036  | 0.35869084  | experimental | MicroSource | 01506196 | ISOBUTAMBEN                 |
| 3264 D09 | X | 749   | 760   | -0.17580465 | 549   | 560   | -0.51235036 | 3443149 | 0.15369427   | 2865210  | -0.27352037 | experimental | MicroSource | 01503832 | ECAMSULE TRIETHANOLAMINE    |
| 3264 D10 | X | 792   | 800   | -0.1333636  | 673   | 680   | -0.29846138 | 3868781 | 0.72496502   | 3978472  | 0.74528425  | experimental | MicroSource | 01506162 | FLURXENE                    |
| 3264 D11 | X | 593   | 600   | -0.32977684 | 433   | 440   | -0.71244006 | 3530894 | 0.27146303   | 3692799  | 0.48384986  | experimental | MicroSource | 01503834 | GADOTERICIDOL               |
| 3264 D12 | X | 469   | 480   | -0.45216499 | 510   | 520   | -0.5796219  | 3415658 | 0.11679666   | 4004665  | 0.76925484  | experimental | MicroSource | 01505462 | SULISALBENZONE              |
| 3264 D13 | X | 472   | 480   | -0.44920398 | 594   | 600   | -0.43472936 | 3515008 | 0.25014131   | 3907960  | 0.68050792  | experimental | MicroSource | 01503836 | IOTHALMIC ACID              |
| 3264 D14 | X | 711   | 720   | -0.2133107  | 671   | 680   | -0.50899053 | 3404364 | 0.95967878   | 3892156  | 0.66157084  | experimental | MicroSource | 01506154 | ALLYLSIOTHIOCYANATE         |
| 3264 E15 | X | 746   | 760   | -0.17876566 | 986   | 1000  | 0.24143582  | 3597354 | 0.36066369   | 3405459  | 0.25658086  | experimental | MicroSource | 01503838 | IODINE                      |
| 3264 D16 | X | 827   | 840   | -0.09881856 | 831   | 840   | -0.02592541 | 3669535 | 0.4575429    | 4208504  | 0.95579863  | experimental | MicroSource | 01506123 | MODALINE SULFATE            |
| 3264 D17 | X | 1550  | 1560  | 0.6147833   | 1030  | 1040  | 0.31733191  | 3062195 | -0.35761098  | 3629070  | 0.4255281   | experimental | MicroSource | 01503840 | MANGAFODIPIR TRISODIUM      |
| 3264 D18 | X | 589   | 600   | -0.33372484 | 631   | 640   | -0.37090765 | 3857271 | 0.70951664   | 4244559  | 0.98870294  | experimental | MicroSource | 01506157 | NKETHAMIDE                  |
| 3264 D19 | X | 753   | 800   | -0.17185665 | 699   | 720   | -0.25361369 | 4162232 | 1.11882632   | 100095   | -2.80402257 | experimental | MicroSource | 01503841 | METHYLCLOTHIAZIDE           |
| 3264 D20 | X | 13746 | 13760 | 12.6522499  | 5105  | 5120  | 7.34634491  | 2671802 | -0.88158497  | 4652944  | 1.36252906  | experimental | MicroSource | 01502267 | VORINOSTAT                  |
| 3264 D21 | X | 633   | 680   | -0.29029679 | 858   | 880   | 0.02064719  | 3309853 | -0.02521169  | 3243539  | 0.07270884  | experimental | MicroSource | 01503842 | NEVIRAPINE                  |
| 3264 D22 | E | 824   | 840   | -0.09684454 | 832   | 840   | -0.09684454 | 3375004 | 0.06301808   | 3643098  | 0.06301808  | experimental | MicroSource | 01502341 | TAZOBACTAM                  |
| 3264 D23 | E | 483   | 720   | -0.43834697 | 345   | 560   | -0.86423224 | 101903  | -4.3308278   | 2461425  | -0.64304527 | empty        |             |          |                             |
| 3264 D24 | P | 78984 | 79480 | 77.0422338  | 71309 | 71840 | 121.542364  | 3270498 | -0.07803282  | 3589840  | 0.38962666  | empty        |             |          |                             |
| 3264 E01 | N | 516   | 520   | -0.40577593 | 1192  | 1200  | 0.59676752  | 2805499 | -0.70214079  | 3588038  | 0.38797756  | empty        |             |          |                             |
| 3264 E02 | E | 76    | 80    | -0.84005646 | 74    | 80    | -1.33168317 | 96369   | -4.33825537  | 2749636  | -0.37928822 | empty        |             |          |                             |
| 3264 E03 | X | 755   | 760   | -0.16988265 | 792   | 800   | -0.09319695 | 4480326 | 1.54576273   | 3863830  | 0.64036932  | experimental | MicroSource | 01506166 | PICONOL                     |
| 3264 E04 | X | 633   | 640   | -0.29029679 | 990   | 1000  | 0.24833546  | 9185287 | 7.86062295   | 3593249  | 0.39274642  | experimental | MicroSource | 01506174 | HYMECHROME                  |
| 3264 E05 | X | 840   | 840   | -0.09190955 | 758   | 840   | -0.09190955 | 3991553 | 0.89156233   | 3161051  | 0.61577088  | experimental | MicroSource | 03070854 | LIMONENE                    |
| 3264 E06 | X | 510   | 520   | -0.41169794 | 950   | 760   | -0.16564322 | 3478466 | 0.20109571   | 3507470  | 0.31424554  | experimental | MicroSource | 01506178 | LEVYCLOSERINE               |
| 3264 E07 | X | 833   | 840   | -0.09289655 | 591   | 600   | -0.43990409 | 3787804 | 0.61628008   | 3478535  | 0.28776556  | experimental | MicroSource | 1502400  | ESTRADIOL DIPROPIONATE      |
| 3264 E08 | X | 950   | 960   | 0.02258259  | 511   | 520   | -0.57789699 | 3385863 | 0.07680669   | 3587561  | 0.38754103  | experimental | MicroSource | 1505458  | PHENISUCCIMIDE              |
| 3264 E09 | X | 711   | 720   | -0.2133107  | 752   | 760   | -0.16046849 | 4350797 | 1.37191272   | 3882152  | 0.65713675  | experimental | MicroSource | 300047   | ANISODAMINE HYDROBROMIDE    |
| 3264 E10 | X | 713   | 720   | -0.2113367  | 753   | 760   | -0.1621934  | 3409805 | 0.10894904   | 3639208  | 0.43480591  | experimental | MicroSource | 1504815  | MILNACIPRAN HYDROCHLORIDE   |
| 3264 E11 | X | 430   | 440   | -0.49065803 | 471   | 480   | -0.64689343 | 3747049 | 0.56157991   | 3502520  | 0.30971554  | experimental | MicroSource | 1505808  | OXDRINE                     |
| 3264 E12 | X | 1920  | 1920  | 0.32104983  | 1954  | 1960  | 1.91114983  | 3559390 | 0.30979953   | 3746742  | 0.30168023  | experimental | MicroSource | 1504282  | DEXLANISOPROZOLE            |
| 3264 E13 | X | 989   | 1000  | 0.06107563  | 508   | 520   | -0.58307172 | 4213547 | 1.18769988   | 3760223  | 0.54555311  | experimental | MicroSource | 1301027  | LACTUL                      |
| 3264 E14 | X | 711   | 720   | -0.2133107  | 673   | 680   | -0.29846138 | 1957834 | -1.83985182  | 3304702  | 0.12868188  | experimental | MicroSource | 1504140  | BUTOXANAZOLE                |
| 3264 E15 | X | 550   | 560   | -0.37221789 | 511   | 520   | -0.57789699 | 4426332 | 1.47329357   | 2638756  | -0.48076034 | experimental | MicroSource | 1506107  | SULFACARBAMIDE              |
| 3264 E16 | X | 1150  | 1160  | 0.21998283  | 511   | 520   | -0.57789699 | 3414518 | 0.11526569   | 3536641  | 0.34094146  | experimental | MicroSource | 1503084  | INAMINONE                   |
| 3264 E17 | X | 1188  | 1200  | 0.25748887  | 1192  | 1200  | 0.59676752  | 4041387 | 0.95663172   | 3511577  | 0.31800407  | experimental | MicroSource | 1506106  | SULBENTINE                  |
| 3264 E18 | X | 670   | 680   | -0.25377775 | 631   | 640   | -0.37090765 | 3625610 | 0.39858806   | 3563674  | 0.36568078  | experimental | MicroSource | 1506104  | HYDROXYTOLUIC ACID          |
| 3264 E19 | X | 830   | 840   | -0.09585756 | 671   | 680   | -0.3019112  | 4045932 | 0.96273188   | 3418865  | 0.23315844  | experimental | MicroSource | 1508161  | HEXYLENE GLYCOL             |
| 3264 E20 | X | 673   | 720   | -0.25081674 | 858   | 880   | 0.02064719  | 3445769 | 0.15721076   | 3464381  | 0.27481253  | experimental | MicroSource | 1506185  | PIDOLIC ACID                |
| 3264 E21 | X | 871   | 880   | -0.0539051  | 631   | 640   | -0.37090765 | 3436746 | 0.14510036   | 3433420  | 0.24647849  | experimental | MicroSource | 1506124  | ADRENOLONE HYDROCHLORIDE    |
| 3264 E22 | X | 1070  | 1080  | 0.14102273  | 631   | 640   | -0.37090765 | 3309068 | -0.0262653   | 3234380  | 0.06432652  | experimental | MicroSource | 1505125  | ALLCLOMETAZONE DIPROPIONATE |
| 3264 E23 | E | 551   | 840   | -0.37123089 | 265   | 520   | -1.00222514 | 100521  | -4.33268268  | 2811774  | -0.32242247 | empty        |             |          |                             |
| 3264 E24 | P | 96630 | 97200 | 94.4588569  | 85789 | 86280 | 146.519078  | 3682803 | 0.47535082   | 4095282  | 0.5218322   | empty        |             |          |                             |
| 3264 F01 | N | 1156  | 1160  | 0.22590483  | 1274  | 1280  | 0.73821023  | 3719910 | 0.52515475   | 3882173  | 0.65715599  | empty        |             |          |                             |
| 3264 F02 | E | 114   | 120   | -0.80255041 | 33    | 40    | -1.40240453 | 94656   | -4.34055451  | 2679067  | -0.44388962 | empty        |             |          |                             |
| 3264 F03 | X | 713   | 720   | -0.2113367  | 874   | 880   | 0.04824577  | 3188355 | -0.18828274  | 3114525  | -2.79081692 | experimental | MicroSource | 1503869  | ACETOPHENAZINE MALEATE      |
| 3264 F04 | X | 553   | 560   | -0.36925689 | 631   | 640   | -0.37090765 | 4005812 | 0.908884     | 3457238  | 0.26827556  | experimental | MicroSource | 1503425  | ESZOPICLONE                 |
| 3264 F05 | X | 592   | 600   | -0.33076384 | 590   | 600   | -0.44162901 | 3414215 | 0.11485991   | 3542209  | 0.34603703  | experimental | MicroSource | 1503862  | AZATADINE MALEATE           |
| 3264 F06 | X | 874   | 880   | -0.0524295  | 872   | 880   | 0.04479594  | 3707567 | 0.50879013   | 93838    | -2.80974868 | experimental | MicroSource | 1505727  | MELENGESTROL ACETATE        |
| 3264 F07 | X | 554   | 560   | -0.37123089 | 672   | 680   | -0.30018629 | 3414706 | 0.11551892   | 3860790  | 0.63758726  | experimental | MicroSource | 1503863  | BEMOTRIZINOL                |
| 3264 F08 | X | 550   | 560   | -0.37221789 | 593   | 600   | -0.43645427 | 4132651 | 1.07912357   | 3964471  | 0.7324712   | experimental | MicroSource | 1505740  | LIPOMIDE                    |
| 3264 F09 | X | 752   | 760   | -0.17284365 | 592   | 600   | -0.43817918 | 3605650 | 0.37179834   | 3916936  | 0.68896942  | experimental | MicroSource | 1503866  | BISACOTRIZOLE               |
| 3264 F10 | X | 553   | 560   | -0.36925689 | 754   | 760   | -0.18741357 | 4150976 | 1.10371885   | 3746746  | 0.53118063  | experimental | MicroSource | 1401414  | CRESOPRINE                  |
| 3264 F11 | X | 73    | 80    | -0.84301746 | 73    | 80    | -1.3340808  | 1161691 | -2.98894176  | 3914365  | 0.68661656  | experimental | MicroSource | 1503887  | CANDICIDIN                  |
| 3264 F12 | X | 749   | 760   | -0.17580465 | 668   | 680   | -0.30708594 | 3807101 | 0.6458217994 | 3405842  | 0.22124041  | experimental | MicroSource | 1        |                             |



|          |   |        |        |             |        |        |             |         |             |          |             |              |             |                                          |
|----------|---|--------|--------|-------------|--------|--------|-------------|---------|-------------|----------|-------------|--------------|-------------|------------------------------------------|
| 3264 K01 | N | 596    | 600    | -0.32681584 | 874    | 880    | 0.04824577  | 3241752 | -0.11661485 | 4005294  | 0.76983047  | empty        |             |                                          |
| 3264 K02 | E | 36     | 40     | -0.8795365  | 72     | 80     | -1.33513299 | 94190   | -4.34117996 | 3639621  | 0.43518387  | empty        |             |                                          |
| 3264 K03 | X | 554    | 560    | -0.36826989 | 1630   | 1640   | 1.35227861  | 3968398 | 0.85861434  | 3242091  | 0.07138326  | experimental | MicroSource | 1301015 CYCLAMIC ACID                    |
| 3264 K04 | X | 954    | 960    | 0.02552359  | 1306   | 1320   | 0.79340739  | 2655672 | -0.90323419 | 3571547  | 0.37289577  | experimental | MicroSource | 1502034 NEFAZODONE HYDROCHLORIDE         |
| 3264 K05 | X | 432    | 440    | -0.48868403 | 585    | 600    | -0.45025356 | 4064649 | 0.92074476  | 3454389  | 0.26566833  | experimental | MicroSource | 1301016 DEHYDROACETIC ACID               |
| 3264 K06 | X | 635    | 640    | -0.28832279 | 872    | 880    | 0.04479594  | 3165380 | -0.2191191  | 3207777  | 0.03998071  | experimental | MicroSource | 1502325 PRASUGREL                        |
| 3264 K07 | X | 393    | 400    | -0.52717708 | 591    | 600    | -0.43990409 | 5066720 | 2.3328035   | 1829314  | -1.22152329 | experimental | MicroSource | 1505082 CYCLANDLATE                      |
| 3264 K08 | X | 714    | 720    | -0.21034969 | 792    | 800    | -0.09319695 | 3971427 | 0.86273346  | 3244609  | 0.07368761  | experimental | MicroSource | 1502330 QUINESTROL                       |
| 3264 K09 | X | 433    | 440    | -0.48769703 | 591    | 600    | -0.43990409 | 4183359 | 1.14718236  | 3318152  | 0.14099068  | experimental | MicroSource | 1505903 CYROMAZINE                       |
| 3264 K10 | X | 675    | 680    | -0.24884274 | 1034   | 1040   | 0.32423155  | 3485166 | 0.21008826  | 3484489  | 0.29321442  | experimental | MicroSource | 1502332 RACTOPAMINE HYDROCHLORIDE        |
| 3264 K11 | X | 592    | 600    | -0.33076384 | 552    | 560    | -0.50717563 | 3412715 | 0.11284666  | 3199324  | 0.03224493  | experimental | MicroSource | 1502382 CYCLANDLATE                      |
| 3264 K12 | X | 512    | 520    | -0.40972394 | 551    | 560    | -0.50890054 | 3306763 | -0.029359   | 1769165  | -1.27605632 | experimental | MicroSource | 1502333 RASAGILINE                       |
| 3264 K13 | X | 1194   | 1200   | 0.26341088  | 952    | 960    | 0.18278884  | 3790844 | 0.62306207  | 3310448  | 0.13394034  | experimental | MicroSource | 1503871 TRAVOPROST                       |
| 3264 K14 | X | 833    | 840    | -0.09289655 | 631    | 640    | -0.37090765 | 3309548 | -0.02562106 | 3975341  | 0.74241891  | experimental | MicroSource | 1502334 ROXATIDINE ACETATE HYDROCHLORIDE |
| 3264 K15 | X | 552    | 560    | -0.37024389 | 712    | 720    | -0.23118984 | 2614621 | -0.95833163 | 3340676  | 0.16160358  | experimental | MicroSource | 1502275 DASATINIB                        |
| 3264 K16 | X | 832    | 840    | -0.09388355 | 514    | 520    | -0.57272225 | 3630995 | 0.40581565  | 2999198  | -0.15090009 | experimental | MicroSource | 1502336 SERATODAST                       |
| 3264 K17 | X | 710    | 720    | -0.2142977  | 513    | 520    | -0.57444717 | 2819639 | -0.6831625  | 1737402  | -1.3056368  | experimental | MicroSource | 1504143 ARTENIMOL                        |
| 3264 K18 | X | 1751   | 1760   | 0.81317054  | 830    | 840    | -0.02765033 | 3590710 | 0.35174631  | 3391613  | 0.20821871  | experimental | MicroSource | 1502350 IDOXURIDINE                      |
| 3264 K19 | X | 867    | 880    | -0.05933851 | 672    | 680    | -0.30018629 | 4401122 | -1.43945745 | 92377    | -2.81108572 | experimental | MicroSource | 1504525 CROTIC ACID                      |
| 3264 K20 | X | 829    | 840    | -0.09684456 | 512    | 520    | -0.57617208 | 3639018 | 0.41658388  | 1605198  | -1.42662364 | experimental | MicroSource | 1502357 LOFEXIDINE HYDROCHLORIDE         |
| 3264 K21 | X | 1067   | 1080   | 0.13806173  | 671    | 680    | -0.3019112  | 3862496 | 0.71652948  | 3003079  | -0.1473492  | experimental | MicroSource | 1500819 BERGENIN                         |
| 3264 K22 | X | 1548   | 1560   | 0.6128093   | 1112   | 1120   | 0.45877462  | 3648033 | 0.42868355  | 87576    | -2.81547936 | experimental | MicroSource | 1502373 RAMOPLANIN [A2 shown; 2mM]       |
| 3264 K23 | E | 634    | 1040   | -0.28930979 | 451    | 720    | -0.68139166 | 100408  | -4.33283435 | 3798493  | 0.580576    | experimental | MicroSource |                                          |
| 3264 K24 | P | 136648 | 137120 | 133.956671  | 89831  | 90400  | 153.491168  | 3886630 | 0.74919523  | 3682191  | 0.47414192  | empty        |             |                                          |
| 3264 L01 | N | 997    | 1000   | 0.06897164  | 1234   | 1240   | 0.66921379  | 3036867 | -0.39160547 | 4166715  | 0.91755532  | empty        |             |                                          |
| 3264 L02 | E | 76     | 80     | -0.84005656 | 33     | 33     | -1.40246453 | 92464   | -4.34349555 | 376748   | 0.39959844  | empty        |             |                                          |
| 3264 L03 | X | 353    | 360    | -0.56665713 | 1149   | 1160   | 0.52596334  | 1979967 | -1.81014555 | 2991617  | -0.15783868 | experimental | MicroSource | 1505751 ERYTHROSINE SODIUM               |
| 3264 L04 | E | 785    | 800    | -0.14027261 | 1260   | 1280   | 0.71406148  | 3241074 | -0.11752484 | 4294410  | 0.10344173  | empty        |             |                                          |
| 3264 L05 | X | 434    | 440    | -0.48671003 | 1190   | 1200   | 0.59331769  | 2861791 | -0.62568733 | 3789199  | 0.57207057  | experimental | MicroSource | 1505679 TETRAMIZOLE HYDROCHLORIDE        |
| 3264 L06 | E | 433    | 440    | -0.48769703 | 830    | 840    | -0.02765033 | 2867461 | -0.61897722 | 2905723  | -0.23644479 | experimental | MicroSource |                                          |
| 3264 L07 | X | 674    | 680    | -0.24982974 | 632    | 640    | -0.36918274 | 2850906 | -0.64119685 | 3359900  | 0.17919647  | experimental | MicroSource | 1300019 OXIGLUTATION DISODIUM SALT       |
| 3264 L08 | E | 474    | 480    | -0.44722998 | 673    | 680    | -0.29846138 | 3067044 | -0.35110279 | 3865369  | 0.64177774  | empty        |             |                                          |
| 3264 L09 | X | 354    | 360    | -0.56567012 | 513    | 520    | -0.57444717 | 2654056 | -0.90540313 | 3752708  | 0.53867574  | experimental | MicroSource | 1505678 TICARCILLIN DISODIUM             |
| 3264 L10 | X | 474    | 480    | -0.44722998 | 513    | 520    | -0.57444717 | 2848467 | -0.64374592 | 480      | -0.26292978 | experimental | MicroSource |                                          |
| 3264 L11 | X | 355    | 360    | -0.56468312 | 593    | 600    | -0.43645427 | 1682490 | -2.20941043 | 3270549  | 0.09742667  | experimental | MicroSource | 1505682 TOCAMPHEPINE CITRATE             |
| 3264 L12 | E | 515    | 520    | -0.40676293 | 1032   | 1040   | 0.32078173  | 3141163 | -0.25162245 | 3979386  | 0.7461207   | empty        |             |                                          |
| 3264 L13 | X | 152    | 160    | -0.76504437 | 711    | 720    | -0.23291475 | 1306258 | -2.71437795 | 3455656  | 0.26682782  | experimental | MicroSource | 1505691 PENFLURIDOL                      |
| 3264 L14 | E | 232    | 240    | -0.68608427 | 552    | 560    | -0.50717563 | 1846303 | -1.98954544 | 2757532  | -0.37206217 | experimental | MicroSource |                                          |
| 3264 L15 | X | 314    | 320    | -0.60515017 | 593    | 600    | -0.43645427 | 1833935 | -2.00614541 | 3398065  | 0.21412327  | experimental | MicroSource | 1505850 AMPYZINE SULFATE                 |
| 3264 L16 | E | 551    | 560    | -0.37123089 | 553    | 560    | -0.50545072 | 2359390 | -1.30089517 | 93545    | -2.81001682 | empty        |             |                                          |
| 3264 L17 | X | 120    | 120    | -0.86469856 | 349    | 360    | -0.65733238 | 1102944 | -3.98726002 | 3812509  | 0.4953144   | experimental | MicroSource | 1505902 DORAMECTIN                       |
| 3264 L18 | E | 669    | 680    | -0.25476475 | 913    | 920    | 0.1155173   | 2757184 | -0.76698777 | 3604742  | 0.40326427  | empty        |             |                                          |
| 3264 L19 | X | 1030   | 1040   | 0.10154268  | 710    | 720    | -0.23463967 | 3085839 | -0.32587669 | 3047364  | -0.10682166 | experimental | MicroSource | 1504914 LEVOCETIRIZINE DIHYDROCHLORIDE   |
| 3264 L20 | E | 866    | 880    | -0.06032551 | 913    | 920    | 0.1155173   | 3677151 | 0.46776487  | 3384031  | 0.20128002  | experimental | MicroSource |                                          |
| 3264 L21 | X | 1305   | 1320   | 0.37296801  | 591    | 600    | -0.43990409 | 3054059 | -0.36853088 | 2932911  | -0.21156362 | experimental | MicroSource | 1504912 OSELTAMIVIR PHOSPHATE            |
| 3264 L22 | E | 1067   | 1080   | 0.13806173  | 791    | 800    | -0.09492186 | 4203036 | 1.17359225  | 3251595  | 0.08008087  | empty        |             |                                          |
| 3264 L23 | E | 383    | 600    | -0.53704709 | 458    | 760    | -0.66931728 | 99685   | -4.33804073 | 3391770  | 0.20836238  | empty        |             |                                          |
| 3264 L24 | P | 71327  | 72000  | 69.4847356  | 101709 | 102160 | 173.976653  | 3221542 | -0.14374012 | 2319111  | -0.92629781 | empty        |             |                                          |
| 3264 M01 | N | 435    | 440    | -0.48572303 | 1113   | 1120   | 0.46409953  | 3088546 | -0.32244344 | 98163    | 4.40879064  | empty        |             |                                          |
| 3264 M02 | E | 115    | 120    | -0.80156341 | 74     | 80     | -1.33168317 | 93036   | -4.34272883 | 2493290  | -0.61388393 | empty        |             |                                          |
| 3264 M03 | X | 907    | 920    | -0.01985846 | 705    | 720    | -0.24326422 | 2078496 | -1.67790283 | 3534191  | 0.33869933  | experimental | MicroSource | 1300042 SODIUM TETRADECYL SULFATE        |
| 3264 M04 | X | 3431   | 3440   | 2.47133255  | 3067   | 3080   | 3.83097595  | 3412204 | 0.11216081  | 3459628  | 0.27046281  | experimental | MicroSource | 1502410 ABACAVIR SULFATE                 |
| 3264 M05 | X | 560    | 560    | -0.3771529  | 782    | 800    | -0.11044606 | 3040278 | -0.38702733 | 3247587  | 0.07641294  | experimental | MicroSource | 1505774 OXELAININ CITRATE                |
| 3264 M06 | X | 514    | 520    | -0.40774993 | 591    | 600    | -0.43990409 | 3412338 | 0.11234066  | 3909550  | 0.6822101   | experimental | MicroSource | 1502414 BAL SALAZIDE DISODIUM            |
| 3264 M07 | X | 633    | 640    | -0.29029679 | 593    | 600    | -0.43645427 | 3729457 | 0.53796845  | 33754072 | 0.539924    | experimental | MicroSource | 1505785 CAMLYOFINE DIHYDROCHLORIDE       |
| 3264 M08 | X | 473    | 480    | -0.44821698 | 593    | 600    | -0.43645427 | 3302421 | -0.03518671 | 3812509  | 0.59340278  | experimental | MicroSource | 1502422 CEFMENOXIME HYDROCHLORIDE        |
| 3264 M09 | X | 714    | 720    | -0.21034969 | 472    | 480    | -0.64516852 | 3253134 | -0.10133827 | 4026593  | 0.78932231  | experimental | MicroSource | 1504623 FTALIDEX                         |
| 3264 M10 | X | 795    | 800    | -0.1304026  | 715    | 720    | -0.22601511 | 3499565 | 0.22941417  | 4040317  | 0.80188186  | experimental | MicroSource | 1502366 FASUDIL HYDROCHLORIDE            |
| 3264 M11 | X | 153    | 160    | -0.76405736 | 152    | 160    | -1.1971401  | 1758931 | -2.10681357 | 3932491  | 0.70320462  | experimental | MicroSource | 1504502 BITOSCANATE                      |
| 3264 M12 | X | 714    | 720    | -0.21034969 | 713    | 720    | -0.22946493 | 3374019 | 0.06091002  | 4229822  | 0.97530786  | experimental | MicroSource | 1502368 ACEGLUTAMIDE                     |
| 3264 M13 | X | 712    | 720    | -0.2123237  | 511    | 520    | -0.57789699 | 3837763 | 0.68333358  | 90540    | -2.81276685 | experimental | MicroSource | 1503711 ORBIFLOXACIN                     |
| 3264 M14 | X | 1434   | 1440   | 0.50029117  | 633    | 640    | -0.36745783 | 3183459 | -0.194854   | 5078008  | 1.75152748  | experimental | MicroSource | 1502328 PRULIFLOXACIN                    |
| 3264 M15 | X | 543    | 560    | -0.3791269  | 633    | 640    | -0.36745783 | 3183459 | -0.194854   | 5078008  | 1.75152748  | experimental | MicroSource | 1505762 PRRITINOL                        |
| 3264 M16 | X | 1671   | 1680   | 0.73421045  | 870    | 880    | 0.04134612  | 1817862 | -2.02771812 | 86382    | -2.81657206 | experimental | MicroSource | 1502329 PYRONARIDINE TETRAPHTHOSPHATE    |
| 3264 M17 | X | 1551   | 1560   | 0.61577031  | 719    | 720    | -0.23118984 | 3169299 | -0.21385914 | 3391752  | 0.20834591  | experimental | MicroSource | 1504510 CHINIOFON                        |
| 3264 M18 | X | 789    | 800    | -0.1363246  | 586    | 600    | -0.44852865 | 4123178 | 0.106640919 | 2094783  | -0.97857865 | experimental | MicroSource | 1502335 RUFLOXACIN HYDROCHLORIDE         |
| 3264 M19 | X | 868    | 880    | -0.05835151 | 1032   | 1040   | 0.32078173  | 3681426 | 0.47350265  | 3722160  | 0.51071965  | experimental | MicroSource | 1504616 METOPROLOL                       |
| 3264 M20 | X | 1547   | 1560   | 0.6118223   | 719    | 720    | -0.23118984 | 3169299 | -0.21385914 | 3391752  | 0.20834591  | experimental | MicroSource | 1502344 TROPISERON HYDROCHLORIDE         |
| 3264 M21 | X | 2104   | 2120   | 1.16158197  | 462    | 480    | -0.64516852 | 3253134 | -0.10133827 | 4026593  | 0.78932231  | experimental | MicroSource | 1505083 PRASTERONE                       |
| 3264 M22 | X | 1026   | 1040   | 0.09759468  | 510    | 520    | -0.57789699 | 3837763 | 0.68333358  | 90540    | -2.81276685 | experimental | MicroSource | 1502349 DIMINAZENE ACETURATE             |
| 3264 M23 | E | 558    | 840    | -0.36432188 | 486    | 680    | -0.61101977 | 97751   | -4.33640049 | 3610553  | 0.40858222  | empty        |             |                                          |
| 3264 M24 | P | 94114  | 94760  | 91.9755619  | 64138  | 64760  | 109.173026  | 3658187 | 0.44231195  | 4142992  | 0.89584516  | empty        |             |                                          |
| 3264 N01 | N | 556    | 560    | -0.36629588 | 1192   | 1200   | 0.59676752  | 2796897 | -0.71368615 | 4464241  | 1.17336427  | empty        |             |                                          |
| 3264 N02 | E | 116    | 120    | -0.80057641 | 33     | 40     | -1.40240453 | 91427   | -4.34488838 | 3458035  | 0.26900497  | empty        |             |                                          |
| 3264 N03 | X | 552    | 560    | -0.37024389 | 910    | 920    | 0.11034257  | 2800930 | -0.70827317 | 3589409  | 0.38923223  |              |             |                                          |

|          |   |        |        |             |        |        |             |          |             |         |             |              |             |         |                                       |
|----------|---|--------|--------|-------------|--------|--------|-------------|----------|-------------|---------|-------------|--------------|-------------|---------|---------------------------------------|
| 3264 N19 | X | 871    | 880    | -0.05539051 | 789    | 800    | -0.09837168 | 2500782  | -1.11112299 | 3750290 | 0.5364629   | experimental | MicroSource | 1504506 | CHLORAMINE-T                          |
| 3264 N20 | E | 741    | 760    | -0.18370066 | 1031   | 1040   | 0.31905682  | 2961451  | -0.49282661 | 3477441 | 0.28676442  | empty        |             |         |                                       |
| 3264 N21 | X | 1504   | 1520   | 0.56938125  | 1068   | 1080   | 0.38287853  | 3006140  | -0.43284635 | 3235530 | 0.06537894  | experimental | MicroSource | 1503680 | SEVOFLURANE                           |
| 3264 N22 | E | 744    | 760    | -0.18073966 | 1390   | 1400   | 0.01829993  | 3105428  | -0.24958491 | 3184965 | 0.02825788  | empty        |             |         |                                       |
| 3264 N23 | X | 597    | 1040   | -0.32582883 | 508    | 840    | -0.58307172 | 98822    | -0.33496303 | 3292191 | 0.11723204  | empty        |             |         |                                       |
| 3264 N24 | P | 149428 | 150240 | 146.570546  | 111421 | 111920 | 190.732001  | 3271898  | -0.07615378 | 3148234 | -0.01451022 | empty        |             |         |                                       |
| 3264 O01 | N | 715    | 720    | -0.20936269 | 1552   | 1560   | 1.21773554  | 2790463  | -0.72232167 | 3172957 | 0.00811151  | empty        |             |         |                                       |
| 3264 O02 | E | 35     | 40     | -0.88052351 | 70     | 80     | -1.33858281 | 90918    | -4.34557154 | 4981253 | 1.66298189  | empty        |             |         |                                       |
| 3264 O03 | X | 753    | 760    | -0.17185665 | 1073   | 1080   | 0.39150309  | 3657934  | 0.44197238  | 3802672 | 0.58440042  | experimental | MicroSource | 330058  | CHLORPYRIFOS                          |
| 3264 O04 | X | 1511   | 1520   | 0.57629026  | 743    | 760    | -0.1777176  | 2548623  | -1.0469122  | 3503168 | 0.31030855  | experimental | MicroSource | 1502303 | LOMERIZINE HYDROCHLORIDE              |
| 3264 O05 | X | 909    | 920    | -0.01788446 | 705    | 720    | -0.24326422 | 3688996  | 0.48366288  | 2973109 | -0.17477632 | experimental | MicroSource | 1504507 | CHLORINDIONE                          |
| 3264 O06 | X | 752    | 760    | -0.17284365 | 1269   | 1280   | 0.72958568  | 3109816  | -0.29369547 | 3066201 | -0.08949142 | experimental | MicroSource | 1506027 | OXOLAMINE CITRATE                     |
| 3264 O07 | X | 551    | 560    | -0.37123089 | 550    | 560    | -0.51062545 | 3491756  | 0.21893316  | 90155   | -2.81311918 | experimental | MicroSource | 1504505 | CARZENIDE                             |
| 3264 O08 | X | 789    | 800    | -0.1363246  | 671    | 680    | -0.3019112  | 3276601  | -0.06984155 | 3112837 | -0.04690388 | experimental | MicroSource | 330068  | PYRTHRINS                             |
| 3264 O09 | X | 2231   | 2240   | 1.28693112  | 872    | 880    | 0.04479594  | 3711784  | 0.51424827  | 2348301 | -0.74657099 | experimental | MicroSource | 1504518 | EFLOXATE                              |
| 3264 O10 | X | 1165   | 1200   | 0.23478784  | 614    | 640    | -0.40023114 | 2991240  | -0.45284469 | 83382   | -2.81931751 | experimental | MicroSource | 1506049 | meta-CRESYL ACETATE                   |
| 3264 O11 | X | 8507   | 8520   | 7.48135061  | 6993   | 7000   | 10.6029772  | 5183369  | 2.48936636  | 2735343 | -0.39236849 | experimental | MicroSource | 1505168 | ETHALRIDINE LACTATE                   |
| 3264 O12 | X | 1648   | 1680   | 0.71150942  | 694    | 720    | -0.26223824 | 3184828  | -0.19301657 | 3730333 | 0.5181992   | experimental | MicroSource | 1506085 | CLORGRILINE HYDROCHLORIDE             |
| 3264 O13 | X | 829    | 840    | -0.09684456 | 791    | 800    | -0.09492185 | 3921788  | 0.79610946  | 3239021 | 0.06857374  | experimental | MicroSource | 1504617 | ISAXONINE                             |
| 3264 O14 | X | 830    | 840    | -0.09585756 | 632    | 640    | -0.36918274 | 2932651  | -0.53148112 | 3498048 | 0.30562297  | experimental | MicroSource | 1506078 | MOROXYDINE HYDROCHLORIDE              |
| 3264 O15 | X | 946    | 960    | 0.01863458  | 590    | 600    | -0.44162901 | 3568410  | 0.3218159   | 2462393 | -0.6421594  | experimental | MicroSource | 1504515 | DIACETAMATE                           |
| 3264 O16 | X | 1232   | 1240   | 0.30091692  | 812    | 520    | -0.57617208 | 3006585  | -0.43224908 | 3189118 | 0.02290488  | experimental | MicroSource | 1506100 | PENTAGASTRIN                          |
| 3264 O17 | X | 1071   | 1080   | 0.14200973  | 532    | 840    | -0.0242005  | 3936357  | 0.81566354  | 2607051 | -0.50977525 | experimental | MicroSource | 1503606 | CYPERMETHRIN                          |
| 3264 O18 | X | 511    | 520    | -0.11071094 | 629    | 640    | -0.37435747 | 3371724  | 0.05782974  | 3284329 | 0.11003747  | experimental | MicroSource | 1506101 | PROTIRELIN                            |
| 3264 O19 | X | 825    | 840    | -0.10079256 | 831    | 840    | -0.02592541 | 3927516  | 0.80379741  | 2650155 | -0.47032851 | experimental | MicroSource | 1701060 | HYDROXYPROGESTERONE                   |
| 3264 O20 | X | 254    | 256    | -0.59684949 | 589    | 590    | -0.44339392 | 3484828  | 0.2096346   | 3422163 | 0.23615762  | experimental | MicroSource | 1506033 | EPIDIDISATE DISODIUM                  |
| 3264 O21 | X | 1799   | 1760   | -0.76184648 | 829    | 840    | -0.02937524 | 2990904  | -0.45329563 | 2951326 | 1.74527056  | experimental | MicroSource | 1502318 | NIFURSOL                              |
| 3264 O22 | X | 1786   | 1800   | 0.84771559  | 989    | 1000   | 0.24661055  | 3557699  | 0.30743991  | 3135763 | -0.02592309 | experimental | MicroSource | 1502371 | AMOROLFINE HYDROCHLORIDE              |
| 3264 O23 | E | 694    | 1240   | -0.23008972 | 322    | 640    | -0.9039052  | 95225    | -4.33979082 | 3085544 | -0.07188114 | empty        |             |         |                                       |
| 3264 O24 | P | 183543 | 184520 | 180.242092  | 105960 | 106840 | 181.312261  | 3663112  | 0.44892214  | 4032266 | 0.79451397  | empty        |             |         |                                       |
| 3264 P01 | N | 1118   | 1120   | 0.18839879  | 713    | 1520   | 1.150464    | 2762504  | -0.75984742 | 93908   | -2.80968462 | empty        |             |         |                                       |
| 3264 P02 | E | 115    | 120    | -0.80156341 | 153    | 760    | -0.16046849 | 75059    | -4.36685703 | 95973   | -2.80779483 | empty        |             |         |                                       |
| 3264 P03 | X | 435    | 440    | -0.48572303 | 668    | 680    | -0.30708594 | 2355047  | -1.30672422 | 2985058 | -0.16384116 | experimental | MicroSource | 1300017 | EVANS BLUE                            |
| 3264 P04 | X | 752    | 760    | -0.17284365 | 952    | 960    | -0.17284365 | 2487919  | -0.2378256  | 7218402 | 0.04982186  | experimental | MicroSource | 1506202 | AMMONIUM LACTATE                      |
| 3264 P05 | X | 752    | 760    | -0.17284365 | 1666   | 1680   | 1.41437541  | 2626580  | -0.94228061 | 3365725 | 0.18452723  | experimental | MicroSource | 1506100 | AMMONIUM LACTATE                      |
| 3264 P06 | E | 1033   | 1040   | 0.10450369  | 1909   | 1920   | 1.83352882  | 3150774  | -0.23872285 | 3470288 | 0.28021834  | empty        |             |         |                                       |
| 3264 P07 | X | 754    | 760    | -0.17086965 | 911    | 920    | 0.11206748  | 2516223  | -1.09039853 | 3309963 | 0.1334965   | experimental | MicroSource | 1506184 | DOCUSATE SODIUM                       |
| 3264 P08 | E | 473    | 480    | -0.44821698 | 794    | 800    | -0.08974713 | 2725002  | -0.8101815  | 96136   | -2.80764566 | empty        |             |         |                                       |
| 3264 P09 | X | 790    | 800    | -0.1353376  | 434    | 440    | -0.71071515 | 2450124  | -1.17911466 | 3740309 | 0.52732876  | experimental | MicroSource | 1502510 | BORNLYN ACETATE                       |
| 3264 P10 | E | 872    | 880    | -0.05440351 | 555    | 560    | -0.5020009  | 2888342  | -0.59699112 | 3197051 | 0.03016478  | empty        |             |         |                                       |
| 3264 P11 | X | 930    | 940    | -0.03563491 | 537    | 560    | -0.3048921  | 27465613 | -0.78117583 | 3192502 | 0.19393236  | experimental | MicroSource | 1502500 | SAXAGLIPTIN                           |
| 3264 P12 | E | 670    | 680    | -0.25377775 | 434    | 440    | -0.71071515 | 2660734  | -0.89644012 | 3691126 | 0.48231881  | empty        |             |         |                                       |
| 3264 P13 | X | 913    | 920    | -0.01393646 | 835    | 840    | -0.01902577 | 2340848  | -1.3257817  | 3338945 | 0.16001945  | experimental | MicroSource | 212037  | MEQUINOL                              |
| 3264 P14 | E | 874    | 880    | -0.0524295  | 514    | 520    | -0.57272225 | 2158770  | -1.57016143 | 3595165 | 0.39449985  | empty        |             |         |                                       |
| 3264 P15 | X | 393    | 400    | -0.52717708 | 534    | 560    | -0.50372581 | 1554644  | -2.38100157 | 3363674 | 0.18265026  | experimental | MicroSource | 1504511 | CHLORALOSE                            |
| 3264 P16 | E | 514    | 520    | -0.40774993 | 834    | 840    | -0.02075068 | 1557039  | -2.37787807 | 3465262 | 0.27561878  | experimental | MicroSource | 1504511 | CHLORALOSE                            |
| 3264 P17 | X | 594    | 600    | -0.32878984 | 872    | 880    | 0.04479594  | 1814528  | -2.03219291 | 3760488 | 0.54579562  | experimental | MicroSource | 1504512 | DEFERIPRONE                           |
| 3264 P18 | E | 563    | 560    | -0.09259889 | 952    | 960    | -0.09259889 | 2189532  | -1.52887358 | 3450015 | 0.26166545  | empty        |             |         |                                       |
| 3264 P19 | X | 1191   | 1200   | 0.26044988  | 1112   | 1120   | 0.45877462  | 24587745 | 0.89297915  | 88620   | 1.14523994  | experimental | MicroSource | 1505448 | NITHIAMIDE                            |
| 3264 P20 | E | 1865   | 1880   | 0.92568868  | 1031   | 1040   | 0.31905682  | 2691024  | -0.85578577 | 3245864 | 0.07483613  | empty        |             |         |                                       |
| 3264 P21 | X | 1346   | 1360   | 0.41343506  | 1232   | 1240   | 0.66576396  | 2753449  | -0.77200077 | 4489303 | 1.21277257  | experimental | MicroSource | 1505443 | METHSUXIMIDE                          |
| 3264 P22 | E | 1187   | 1200   | 0.25650187  | 950    | 960    | 0.17933901  | 3202829  | -0.16885616 | 3127633 | -0.03336328 | empty        |             |         |                                       |
| 3264 P23 | E | 655    | 1200   | -0.26858276 | 602    | 1160   | -0.42093007 | 94157    | -4.34122425 | 3350700 | 0.17077707  | empty        |             |         |                                       |
| 3264 P24 | P | 185342 | 185880 | 182.017707  | 190967 | 191280 | 327.941784  | 3055292  | -0.36687598 | 3625836 | 0.42256849  | empty        |             |         |                                       |
| 3266 A01 | N | 318    | 320    | -0.761464   | 638    | 640    | 0.41624237  | 2455382  | -0.73715915 | 2177268 | -0.93828049 | empty        |             |         |                                       |
| 3266 A02 | E | 157    | 160    | -1.53287004 | 196    | 200    | -1.03426815 | 67219    | -4.71217418 | 68409   | -4.70581436 | empty        |             |         |                                       |
| 3266 A03 | X | 477    | 480    | 0.00035935  | 517    | 520    | 0.01915691  | 2588142  | -0.51345959 | 2602819 | -0.17802207 | experimental | Tocris      | 109     | (-)-Bicuculline methobromide          |
| 3266 A04 | X | 597    | 600    | 0.57532037  | 397    | 400    | -0.37464685 | 2722529  | -0.28963179 | 2391413 | -0.55570463 | experimental | Tocris      | 440     | m-Chlorophenylguanidine hydrochloride |
| 3266 A05 | X | 355    | 360    | -0.58418436 | 337    | 440    | -0.24337893 | 2871136  | -0.04211991 | 2968541 | -0.47535201 | experimental | Tocris      | 114     | NMDA                                  |
| 3266 A06 | X | 477    | 480    | 0.00035935  | 416    | 320    | -0.64046439 | 2777811  | -0.19755704 | 2535490 | -0.29830716 | experimental | Tocris      | 442     | 4-Chlorophenylguanidine hydrochloride |
| 3266 A07 | X | 396    | 400    | -0.38773934 | 797    | 800    | 0.93803235  | 3206776  | 0.51690413  | 3077702 | 0.67036993  | experimental | Tocris      | 130     | (+)-Bicuculline                       |
| 3266 A08 | X | 436    | 440    | -0.19608567 | 435    | 440    | -0.24994232 | 3312712  | 0.69334547  | 2710280 | 0.01395992  | experimental | Tocris      | 443     | 6-Chloromestolonin                    |
| 3266 A09 | X | 477    | 480    | 0.00035935  | 516    | 520    | 0.01587521  | 3085205  | 0.31442197  | 2950718 | 0.44350894  | experimental | Tocris      | 131     | (-)-Bicuculline methochloride         |
| 3266 A10 | X | 436    | 440    | -0.19608567 | 476    | 480    | -0.11539271 | 2252524  | -1.07244699 | 2029967 | -1.20143773 | experimental | Tocris      | 444     | Clozapine                             |
| 3266 A11 | X | 396    | 400    | -0.38773934 | 395    | 400    | -0.38121024 | 3086998  | 0.31740829  | 2924770 | 0.39715213  | experimental | Tocris      | 162     | S-Sulfo-L-cysteine sodium salt        |
| 3266 A12 | X | 397    | 400    | -0.382948   | 557    | 560    | 0.15042483  | 2460871  | -0.72543537 | 2394715 | -0.54980552 | experimental | Tocris      | 448     | Calpeptin                             |
| 3266 A13 | X | 515    | 520    | 0.18243034  | 315    | 320    | -0.64374608 | 2928962  | 0.05419198  | 2459990 | -0.43318996 | experimental | Tocris      | 169     | (RS)-AMPA                             |
| 3266 A14 | X | 675    | 680    | 0.94904504  | 435    | 440    | -0.24994232 | 2556473  | -0.56620579 | 2443931 | -0.4618798  | experimental | Tocris      | 452     | CCCP                                  |
| 3266 A15 | X | 315    | 320    | -0.77583803 | 795    | 800    | 0.93146896  | 3065248  | 0.28118266  | 2594791 | -0.19236431 | experimental | Tocris      | 180     | ZAPA sulphate                         |
| 3266 A16 | X | 477    | 480    | 0.00035935  | 395    | 476    | 0.93146896  | 2643921  | -0.42055707 | 4500173 | 0.42681384  | experimental | Tocris      | 453     | FCCP                                  |
| 3266 A17 | X | 355    | 360    | -0.58418436 | 474    | 480    | -0.12185761 | 3520309  | 1.03909627  | 2804226 | 0.181797    | experimental | Tocris      | 186     | cis-ACPD                              |
| 3266 A18 | X | 596    | 600    | 0.57052903  | 356    | 360    | -0.50919647 | 3097928  | 0.33561272  | 2666142 | -0.06489381 | experimental | Tocris      | 454     | Carbetapentane citrate                |
| 3266 A19 | X | 514    | 520    | 0.177639    | 393    | 400    | -0.38773934 | 3221462  | 0.54136435  | 3137671 | 0.77750555  | experimental | Tocris      | 1435    | SD 22536                              |
| 3266 A20 | X | 554    | 560    | 0.36929267  | 753    | 760    | 0           |          |             |         |             |              |             |         |                                       |





|          |   |        |        |             |        |        |             |         |             |         |             |              |        |                                                                      |
|----------|---|--------|--------|-------------|--------|--------|-------------|---------|-------------|---------|-------------|--------------|--------|----------------------------------------------------------------------|
| 3266 F07 | X | 435    | 440    | -0.20087701 | 435    | 440    | -0.24994232 | 3042896 | 0.24395436  | 2606861 | -0.17080093 | experimental | Tocris | 645 2-(1-Thienyl)ethyl 3,4-dihydroxybenzylideneacyanoacetate         |
| 3266 F08 | X | 395    | 400    | -0.39253068 | 513    | 520    | 0.00603012  | 3297083 | 0.66731464  | 3063942 | 0.64578669  | experimental | Tocris | 788 3-Aminobenzamide                                                 |
| 3266 F09 | X | 315    | 320    | -0.77583803 | 555    | 560    | 0.14386144  | 3408257 | 0.85248011  | 3137961 | 0.77802364  | experimental | Tocris | 646 HTMT dimaleate                                                   |
| 3266 F10 | X | 476    | 480    | -0.00443199 | 435    | 440    | -0.24994232 | 3383410 | 0.81109628  | 3082348 | 0.67686951  | experimental | Tocris | 750 Rilmenidine hemifumarate                                         |
| 3266 F11 | X | 395    | 400    | -0.39253068 | 435    | 440    | -0.24994232 | 3341855 | 0.74188449  | 3011023 | 0.55124466  | experimental | Tocris | 649 (S)-Timocil maleate                                              |
| 3266 F12 | X | 394    | 400    | -0.39732202 | 314    | 320    | -0.64702778 | 3267023 | 0.61724831  | 2750115 | 0.08512623  | experimental | Tocris | 791 Antazolone hydrochloride                                         |
| 3266 F13 | X | 596    | 600    | 0.57052903  | 435    | 440    | -0.24994232 | 3191858 | 0.49205751  | 2820833 | 0.21146586  | experimental | Tocris | 652 Thallidomide                                                     |
| 3266 F14 | X | 394    | 400    | -0.39732202 | 435    | 440    | -0.24994232 | 3294362 | 0.66278269  | 2817677 | 0.20582758  | experimental | Tocris | 792 Efaroxan hydrochloride                                           |
| 3266 F15 | X | 435    | 440    | -0.20087701 | 475    | 480    | -0.11867444 | 3418124 | 0.86891406  | 3089261 | 0.69101977  | experimental | Tocris | 653 (R)-Vesamicol hydrochloride                                      |
| 3266 F16 | X | 434    | 440    | -0.20566835 | 395    | 400    | -0.38121024 | 3015502 | 0.19832838  | 2686647 | -0.02826107 | experimental | Tocris | 793 Idazoxan hydrochloride                                           |
| 3266 F17 | X | 515    | 520    | 0.18243034  | 395    | 400    | -0.38121024 | 2516539 | -0.63271772 | 2248795 | -0.10494956 | experimental | Tocris | 654 Verapamil hydrochloride                                          |
| 3266 F18 | X | 393    | 400    | -0.40211337 | 435    | 440    | -0.24994232 | 2240526 | -1.09243022 | 2232925 | -0.82528846 | experimental | Tocris | 797 8-Hydroxy-PIPAT oxalate                                          |
| 3266 F19 | X | 633    | 640    | 0.74780868  | 555    | 560    | 0.14386144  | 3075930 | 0.29897403  | 2902216 | 0.35685888  | experimental | Tocris | 658 FGIN-1-27                                                        |
| 3266 F20 | X | 554    | 560    | 0.36929267  | 554    | 560    | 0.14057974  | 3428560 | 0.8862957   | 2923019 | 0.39402392  | experimental | Tocris | 800 7-NINA                                                           |
| 3266 F21 | X | 553    | 560    | 0.36450133  | 632    | 640    | 0.39655218  | 3197378 | 0.50125132  | 2880023 | 0.3172104   | experimental | Tocris | 659 FGIN-1-43                                                        |
| 3266 F22 | X | 711    | 720    | 1.12153334  | 712    | 720    | 0.65908802  | 3115557 | 0.36497464  | 2771641 | 0.12358302  | experimental | Tocris | 805 (S)-3,5-DHPG                                                     |
| 3266 F23 | E | 853    | 1240   | 1.80190389  | 816    | 1160   | 1.00038462  | 78913   | -4.69269728 | 79107   | -4.68670209 | empty        |        |                                                                      |
| 3266 F24 | P | 129986 | 130600 | 620.522251  | 115007 | 115680 | 375.740761  | 2905292 | 0.01476849  | 2880038 | 0.3172372   | empty        |        |                                                                      |
| 3266 G01 | N | 517    | 520    | 0.19201302  | 437    | 440    | -0.24337893 | 2984626 | 0.14690296  | 2916138 | 0.38173083  | empty        |        |                                                                      |
| 3266 G02 | E | 157    | 160    | -1.53287004 | 116    | 120    | -1.29680399 | 75969   | -4.69760065 | 76662   | -4.69107015 | empty        |        |                                                                      |
| 3266 G03 | X | 357    | 360    | -0.57460167 | 436    | 440    | -0.24666063 | 3438990 | 0.90366735  | 2879745 | 0.31671375  | experimental | Tocris | 289 Muscimol                                                         |
| 3266 G04 | X | 355    | 360    | -0.58418436 | 555    | 560    | 0.14386144  | 3179191 | 0.47096003  | 3135194 | 0.77308032  | experimental | Tocris | 497 AC 99                                                            |
| 3266 G05 | X | 436    | 440    | -0.19608567 | 355    | 360    | -0.51247816 | 3305404 | 0.68117365  | 2900479 | 0.35375556  | experimental | Tocris | 310 (RIS)-4-Carboxy-3-hydroxyphenylglycine                           |
| 3266 G06 | X | 315    | 320    | -0.77583803 | 395    | 360    | -0.50919647 | 3452506 | 0.92617888  | 3035728 | 0.59538161  | experimental | Tocris | 498 U-54494A hydrochloride                                           |
| 3266 G07 | X | 434    | 440    | -0.20566835 | 356    | 400    | -0.38777364 | 3120390 | 0.37302422  | 2918019 | 0.38509129  | experimental | Tocris | 312 (RIS)-Tetraol-5-ylglycine                                        |
| 3266 G08 | X | 635    | 640    | 0.75739136  | 355    | 360    | -0.11288034 | 1551511 | -2.30095522 | 1465268 | -2.21694933 | experimental | Tocris | 3050 Dorsomorphin dihydrochloride                                    |
| 3266 G09 | X | 434    | 440    | -0.20566835 | 392    | 400    | -0.39105344 | 3325541 | 0.71471277  | 2856206 | 0.48666068  | experimental | Tocris | 652 (S)-Carboxy-3-hydroxyphenylglycine                               |
| 3266 G10 | X | 675    | 680    | -0.00922333 | 435    | 440    | -0.24994232 | 2158776 | -1.22858865 | 2097218 | -1.08129199 | experimental | Tocris | 504 Diphenyletidonum chloride                                        |
| 3266 G11 | X | 395    | 400    | -0.39253068 | 394    | 400    | -0.38449194 | 3461988 | 0.94197159  | 3188903 | 0.86903291  | experimental | Tocris | 328 (R)-3-Carboxy-4-hydroxyphenylglycine                             |
| 3266 G12 | X | 435    | 440    | -0.20087701 | 436    | 440    | -0.24666063 | 3082616 | 0.31010987  | 2892916 | 0.3402441   | experimental | Tocris | 506 Dimaprit dihydrochloride                                         |
| 3266 G13 | X | 354    | 360    | -0.5889757  | 554    | 360    | -0.51575986 | 3330132 | 0.72235929  | 2779899 | 0.13833616  | experimental | Tocris | 329 (S)-3-Carboxy-4-hydroxyphenylglycine                             |
| 3266 G14 | X | 395    | 400    | -0.39253068 | 315    | 520    | 0.01259352  | 2523441 | -0.62122212 | 2424961 | -0.49577022 | experimental | Tocris | 507 Dantrolene, sodium salt                                          |
| 3266 G15 | X | 355    | 360    | -0.58418436 | 474    | 480    | -0.1219561  | 3196498 | 0.49978564  | 2782216 | 0.14229689  | experimental | Tocris | 342 (RS)-3,5-DHPG                                                    |
| 3266 G16 | X | 434    | 440    | -0.20566835 | 436    | 440    | -0.24994232 | 3482402 | 0.10349729  | 2954686 | 0.45059788  | experimental | Tocris | 508 Tolipin hydrochloride                                            |
| 3266 G17 | X | 513    | 520    | 0.17284766  | 473    | 480    | -0.12523778 | 3286132 | 0.64907524  | 2701851 | -0.00109871 | experimental | Tocris | 347 <i>rac</i> -Binaltorphimine dihydrochloride                      |
| 3266 G18 | X | 394    | 400    | -0.39732202 | 395    | 400    | -0.38121024 | 3101303 | 0.34123394  | 2854739 | 0.27203985  | experimental | Tocris | 511 BD 1008 dihydrobromide                                           |
| 3266 G19 | X | 671    | 680    | 0.92987967  | 433    | 440    | -0.25650572 | 3343925 | 0.74533217  | 2999372 | 0.53043063  | experimental | Tocris | 348 2-BFI hydrochloride                                              |
| 3266 G20 | X | 474    | 480    | -0.10401467 | 634    | 640    | 0.40311558  | 3299043 | 0.67057911  | 3075512 | 0.66645681  | experimental | Tocris | 512 SKF 91488 dihydrochloride                                        |
| 3266 G21 | X | 474    | 480    | -0.10401467 | 634    | 640    | 0.40311558  | 3056280 | 0.26624604  | 2883984 | 0.32428684  | experimental | Tocris | 351 1-Acetyl-4-methylpiperazine hydrochloride                        |
| 3266 G22 | X | 232    | 240    | -1.1735194  | 230    | 240    | -0.92269041 | 1178629 | -2.8610691  | 1171887 | -2.73442095 | experimental | Tocris | 513 BGR 12783 dihydrochloride                                        |
| 3266 G23 | P | 1040   | 1040   | 0.36581009  | 831    | 831    | 0.36581009  | 75418   | -4.6981837  | 75418   | -4.68667478 | empty        |        |                                                                      |
| 3266 G24 | P | 92945  | 93640  | 443.046158  | 123807 | 124520 | 404.619704  | 2764697 | -0.12939902 | 2667186 | -0.06302868 | empty        |        |                                                                      |
| 3266 H01 | N | 437    | 440    | -0.19129432 | 397    | 400    | -0.37464685 | 2780480 | -0.1931117  | 2635536 | -0.11957226 | empty        |        |                                                                      |
| 3266 H02 | E | 157    | 160    | -1.53287004 | 157    | 160    | -1.16225437 | 79013   | -4.69253073 | 77307   | -4.68991784 | empty        |        |                                                                      |
| 3266 H03 | X | 276    | 280    | -0.96270036 | 435    | 440    | -0.24994232 | 3084604 | 0.31342098  | 3014832 | 0.55805034  | experimental | Tocris | 660 Mepyramine maleate                                               |
| 3266 H04 | X | 397    | 400    | -0.382948   | 594    | 600    | 0.27184766  | 3367135 | 0.78398951  | 3203525 | 0.89515551  | experimental | Tocris | 807 THIP hydrochloride                                               |
| 3266 H05 | X | 355    | 360    | -0.58418436 | 595    | 600    | 0.27512936  | 2908940 | 0.02084441  | 3144487 | 0.79037927  | experimental | Tocris | 861 2-[4-(2-Methoxyphenyl)piperazin-1-yl]methyl-6-methyl-2,3 dihydro |
| 3266 H06 | X | 436    | 440    | -0.19608567 | 631    | 640    | -0.51247816 | 2250317 | -1.07612285 | 1884950 | -1.46521953 | experimental | Tocris | 2777 Melafazone hydrochloride                                        |
| 3266 H07 | X | 513    | 520    | 0.18243034  | 395    | 320    | -0.64734608 | 3161677 | 0.186269    | 2903869 | 0.15870971  | experimental | Tocris | 862 <i>trans</i> -Triprolidine hydrochloride                         |
| 3266 H08 | X | 394    | 400    | -0.39732202 | 433    | 440    | -0.25650572 | 3010402 | 0.18983409  | 2525553 | -0.31605988 | experimental | Tocris | 821 ICI-118,551 hydrochloride                                        |
| 3266 H09 | X | 475    | 480    | -0.00922333 | 475    | 480    | -0.11867444 | 3361087 | 0.77391628  | 3094827 | 0.70096358  | experimental | Tocris | 665 L-NAME hydrochloride                                             |
| 3266 H10 | X | 475    | 480    | -0.00922333 | 314    | 320    | -0.64702778 | 3172497 | 0.45981086  | 2921153 | 0.39069026  | experimental | Tocris | 822 ICI 204,448 hydrochloride                                        |
| 3266 H11 | X | 435    | 440    | -0.20087701 | 636    | 640    | 0.40967897  | 3476811 | 0.96665999  | 2940960 | 0.42607601  | experimental | Tocris | 666 3-(4-Allylpiperazin-1-yl)-2-quinoxalinecarboxylic acid maleate   |
| 3266 H12 | X | 395    | 400    | -0.39253068 | 394    | 400    | -0.38449194 | 3394221 | 0.8291025   | 3003328 | 0.53749813  | experimental | Tocris | 825 Clofluric acid                                                   |
| 3266 H13 | X | 475    | 480    | -0.00922333 | 515    | 520    | 0.01259352  | 3451053 | 0.92375884  | 3054245 | 0.62846274  | experimental | Tocris | 668 Arthamine dihydrobromide                                         |
| 3266 H14 | X | 394    | 400    | -0.39253068 | 394    | 400    | -0.38449194 | 2958520 | 0.10342221  | 2954686 | 0.45059788  | experimental | Tocris | 826 Tolidine                                                         |
| 3266 H15 | X | 315    | 320    | -0.77583803 | 594    | 600    | 0.27184766  | 3001727 | 0.17538548  | 3017760 | 0.56328129  | experimental | Tocris | 670 PK 11915                                                         |
| 3266 H16 | X | 314    | 320    | -0.78062937 | 592    | 600    | 0.26528426  | 2972641 | 0.12694139  | 2705369 | 0.00518629  | experimental | Tocris | 629 Pronethalol hydrochloride                                        |
| 3266 H17 | X | 1034   | 1040   | 2.66913676  | 1154   | 1160   | 2.10959854  | 3208219 | 0.51930751  | 2913024 | 0.37616758  | experimental | Tocris | 671 AH 6809                                                          |
| 3266 H18 | X | 550    | 560    | 0.35012731  | 429    | 440    | -0.26963251 | 3498775 | 1.00324205  | 2833030 | 0.23325613  | experimental | Tocris | 801 Primidone                                                        |
| 3266 H19 | X | 1514   | 1520   | 4.96898085  | 955    | 960    | 1.45654064  | 3509038 | 1.02033556  | 3040538 | 0.60397481  | experimental | Tocris | 675 NPC 15199                                                        |
| 3266 H20 | X | 311    | 320    | -0.7950034  | 392    | 400    | -0.39105344 | 1672036 | -2.03927677 | 1549393 | -2.05999623 | experimental | Tocris | 2908 EO 1428                                                         |
| 3266 H21 | X | 715    | 720    | 1.14069871  | 674    | 680    | 0.5343835   | 2989153 | 0.15444289  | 2797614 | 0.16998449  | experimental | Tocris | 677 Naltrexone hydrochloride                                         |
| 3266 H22 | X | 592    | 600    | 0.55136366  | 751    | 760    | 0.78707424  | 2916073 | 0.03272475  | 2505360 | -0.35213522 | experimental | Tocris | 832 ICI-89406                                                        |
| 3266 H23 | E | 598    | 920    | 0.58011171  | 1057   | 1440   | 1.79127383  | 76865   | -4.69610832 | 76989   | -4.69408596 | empty        |        |                                                                      |
| 3266 H24 | P | 107698 | 108320 | 513.732824  | 128687 | 129320 | 420.63439   | 2923871 | 0.04571268  | 2967098 | 0.47277225  | empty        |        |                                                                      |
| 3266 I01 | N | 397    | 400    | -0.382948   | 557    | 560    | 0.15042483  | 3444321 | 0.91254638  | 3314139 | 1.09277042  | empty        |        |                                                                      |
| 3266 I02 | E | 116    | 120    | -1.72931506 | 156    | 160    | -1.16553607 | 75474   | -4.69842509 | 77246   | -4.69002622 | empty        |        |                                                                      |
| 3266 I03 | X | 477    | 480    | 0.00035935  | 436    | 440    | -0.24666063 | 3200997 | 0.50727894  | 3022440 | 0.57164244  | experimental | Tocris | 352 4-Acetyl-1,1-dimethylpiperazinium iodide                         |
| 3266 I04 | X | 155    | 160    | -1.54245273 | 495    | 440    | -0.38121024 | 1686879 | -2.01455507 | 1672580 | -1.83991931 | experimental | Tocris | 514 BGR 12935 dihydrochloride                                        |
| 3266 I05 | X | 435    | 440    | -0.19608567 | 395    | 400    | -0.38121024 | 2556020 | 0.8959223   | 2903869 | 0.35841844  | experimental | Tocris | 808 N-Acetyltyramine                                                 |
| 3266 I06 | X | 316    | 320    | -0.77104669 | 356    | 360    | -0.50919647 | 3211860 | 0.52537177  | 3133366 | 0.76981812  | experimental | Tocris | 515 Dobutamine hydrochloride                                         |
| 3266 I07 | X | 315    | 320    | -0.77583803 | 435    | 440    | -0.24994232 | 3198397 | 0.50294851  | 2920887 | 0.39021505  | experimental | Tocris | 660 (R)-1-(1,2-Diphenylethyl)piperidine maleate                      |
| 3266 I08 | X | 556    | 560    | 0.37887536  | 475    | 480    | -0.11867444 | 3528785 | 1.05322511  | 3399175 | 1.24468955  | experimental | Tocris | 518 EBPC                                                             |
| 3266 I09 | X | 235    | 240    | -1.15914538 | 395    |        |             |         |             |         |             |              |        |                                                                      |

|          |   |        |        |             |        |        |             |         |             |         |             |              |        |                                                                    |
|----------|---|--------|--------|-------------|--------|--------|-------------|---------|-------------|---------|-------------|--------------|--------|--------------------------------------------------------------------|
| 3266 J01 | N | 516    | 520    | 0.18722168  | 396    | 400    | -0.37792855 | 2632237 | -0.44001732 | 2547635 | -0.27660979 | empty        |        |                                                                    |
| 3266 J02 | E | 197    | 200    | -1.34121637 | 157    | 160    | -1.16225437 | 76899   | -4.69605169 | 81319   | -4.68275029 | empty        |        |                                                                    |
| 3266 J03 | X | 356    | 360    | -0.57939301 | 316    | 320    | -0.64046439 | 3113665 | 0.36182342  | 3032251 | 0.58916986  | experimental | Tocris | 678 (+)-AJ 76 hydrochloride                                        |
| 3266 J04 | X | 435    | 440    | -0.20087701 | 395    | 400    | -0.38121024 | 3231679 | 0.55838122  | 2815019 | 0.20107899  | experimental | Tocris | 833 ICI-162,846                                                    |
| 3266 J05 | X | 515    | 520    | -0.58243034 | 436    | 440    | -0.24666063 | 1217571 | 0.38498451  | 2758375 | 0.099886295 | experimental | Tocris | 660 2-Phenylmelatonin                                              |
| 3266 J06 | X | 275    | 280    | -0.9674917  | 315    | 320    | -0.64374608 | 2745981 | -0.25057139 | 2599527 | -0.18390332 | experimental | Tocris | 834 (S)-(-)-Propranolol hydrochloride                              |
| 3266 J07 | X | 476    | 480    | -0.00443199 | 435    | 440    | -0.24994232 | 3212057 | 0.52569988  | 3005435 | 0.54126235  | experimental | Tocris | 681 L-690,330                                                      |
| 3266 J08 | X | 435    | 440    | -0.20087701 | 395    | 400    | -0.38121024 | 2710176 | -0.31020628 | 2671248 | -0.0557718  | experimental | Tocris | 835 (R)-(+)-Propranolol hydrochloride                              |
| 3266 J09 | X | 356    | 360    | -0.57939301 | 315    | 320    | -0.64374608 | 3107606 | 0.35173188  | 3047619 | 0.61662521  | experimental | Tocris | 685 Diltiazem hydrochloride                                        |
| 3266 J10 | X | 396    | 400    | -0.38773934 | 376    | 380    | -0.77173231 | 3372066 | 0.79220232  | 2690428 | -0.02150621 | experimental | Tocris | 836 ICI-185,282                                                    |
| 3266 J11 | X | 315    | 320    | -0.77583803 | 436    | 440    | -0.24666063 | 3349537 | 0.75467922  | 3328294 | 1.11805872  | experimental | Tocris | 686 Galanthamine hydrobromide                                      |
| 3266 J12 | X | 395    | 400    | -0.39253068 | 312    | 320    | -0.65359118 | 3279780 | 0.63949569  | 2850592 | 0.30847607  | experimental | Tocris | 837 ICI 192,605                                                    |
| 3266 J13 | X | 675    | 680    | 0.94904504  | 595    | 600    | 0.27512936  | 2725246 | -0.23963708 | 2661639 | -0.07293854 | experimental | Tocris | 687 Danazol                                                        |
| 3266 J14 | X | 435    | 440    | -0.20087701 | 475    | 480    | -0.1186744  | 3106001 | 0.34905868  | 2909567 | 0.36999156  | experimental | Tocris | 838 DHPB dibromide                                                 |
| 3266 J15 | X | 314    | 320    | -0.78062937 | 395    | 400    | -0.38121024 | 3372182 | 0.79239552  | 3163435 | 0.82353364  | experimental | Tocris | 690 Clonidine hydrochloride                                        |
| 3266 J16 | X | 475    | 480    | -0.00922333 | 395    | 400    | -0.38121024 | 2263432 | -1.05427921 | 1951284 | -1.34200704 | experimental | Tocris | 840 Loperamide hydrochloride                                       |
| 3266 J17 | X | 395    | 400    | -0.39253068 | 475    | 480    | -0.1186744  | 6974399 | 6.79205559  | 7737744 | 8.99566088  | experimental | Tocris | 691 Dipyridamole                                                   |
| 3266 J18 | X | 393    | 400    | -0.40211337 | 470    | 480    | -0.13508289 | 3389995 | 0.8220639   | 2781371 | 0.14096593  | experimental | Tocris | 841 DTG                                                            |
| 3266 J19 | X | 635    | 640    | 0.75739136  | 473    | 480    | -0.1252378  | 3005962 | 0.18243907  | 3000299 | 0.53208674  | experimental | Tocris | 692 Ipratropium bromide                                            |
| 3266 J20 | X | 594    | 600    | 0.56094635  | 633    | 640    | 0.39983388  | 3048503 | 0.25329308  | 2801098 | 0.17620875  | experimental | Tocris | 843 Oxotremorine sesquifumarate                                    |
| 3266 J21 | X | 474    | 480    | -0.10401467 | 994    | 1000   | 1.58452686  | 3005225 | 0.18121156  | 3103996 | 0.71734425  | experimental | Tocris | 694 Picotamide hydrochloride                                       |
| 3266 J22 | X | 630    | 640    | 0.73343465  | 710    | 720    | 0.65252463  | 2925385 | 0.04823432  | 2782146 | 0.14235048  | experimental | Tocris | 847 Statal                                                         |
| 3266 J23 | E | 1057   | 1400   | 2.77933763  | 715    | 1040   | 0.66893312  | 78081   | -4.69408301 | 77453   | -4.68965701 | empty        |        |                                                                    |
| 3266 J24 | P | 114401 | 115120 | 545.849189  | 108675 | 109240 | 354.96105   | 3102821 | 0.34376224  | 3032191 | 0.58906267  | empty        |        |                                                                    |
| 3266 K01 | N | 676    | 680    | 0.95383638  | 517    | 520    | 0.01915691  | 2868158 | -0.04707991 | 3048503 | 0.6182045   | empty        |        |                                                                    |
| 3266 K02 | E | 156    | 160    | -1.53766139 | 156    | 160    | -1.16553607 | 78262   | -4.6937875  | 78500   | -4.68778761 | empty        |        |                                                                    |
| 3266 K03 | X | 554    | 560    | -0.57243034 | 435    | 440    | -0.24994232 | 1320412 | 0.47892291  | 2478898 | 1.03994103  | experimental | Tocris | 2768 PD 401                                                        |
| 3266 K04 | X | 596    | 600    | 0.57052903  | 515    | 520    | 0.01259352  | 2822713 | -0.12277067 | 2628202 | -0.13267465 | experimental | Tocris | 542 H-9 dihydrochloride                                            |
| 3266 K05 | X | 395    | 400    | -0.39253068 | 395    | 400    | -0.38121024 | 3103654 | 0.34514964  | 2960144 | 0.46034874  | experimental | Tocris | 382 Arcaidine but-2-ynyl ester tosylate                            |
| 3266 K06 | X | 356    | 360    | -0.57939301 | 436    | 440    | -0.24666063 | 3200993 | 0.50727227  | 2784688 | 0.14689184  | experimental | Tocris | 543 C-1                                                            |
| 3266 K07 | X | 276    | 280    | -0.96270036 | 376    | 380    | -0.11539271 | 3153051 | 0.42742264  | 2904037 | 0.36011207  | experimental | Tocris | 383 Arcaidine propargyl ester tosylate                             |
| 3266 K08 | X | 315    | 320    | -0.77583803 | 435    | 360    | -0.51247816 | 1940433 | -1.59224908 | 1956012 | -1.33356034 | experimental | Tocris | 544 IPAG                                                           |
| 3266 K09 | X | 356    | 360    | -0.57939301 | 436    | 440    | -0.24666063 | 3255623 | 0.59826108  | 3134592 | 0.77200483  | experimental | Tocris | 385 N-[2-(Acetoxy)ethyl]-3-pyridinecarboxamide                     |
| 3266 K10 | X | 515    | 520    | -0.01880602 | 473    | 480    | -0.00724842 | 3245915 | 0.58378415  | 3150322 | 0.47626594  | experimental | Tocris | 391 Pyrogallol hemitartrate                                        |
| 3266 K11 | X | 396    | 400    | -0.38773934 | 473    | 480    | -0.1252378  | 3202989 | 0.5105967   | 3016735 | 0.5614501   | experimental | Tocris | 386 3-Methyl-GABA (2:1 salt with naphthalene-1,5-disulphonic acid) |
| 3266 K12 | X | 315    | 320    | -0.77583803 | 615    | 1120   | 1.98161232  | 3159665 | 0.43843857  | 3183154 | 0.85876127  | experimental | Tocris | 545 Methylergometrine maleate                                      |
| 3266 K13 | X | 395    | 400    | -0.39253068 | 473    | 480    | -0.1252378  | 3232799 | 0.56024665  | 2710889 | 0.01504792  | experimental | Tocris | 387 (RS)-Atenolol                                                  |
| 3266 K14 | X | 395    | 400    | -0.39253068 | 395    | 400    | -0.38121024 | 3243399 | 0.57790144  | 3035462 | 0.5949064   | experimental | Tocris | 552 MPMX                                                           |
| 3266 K15 | X | 436    | 440    | -0.19608567 | 395    | 400    | -0.38121024 | 3319299 | 0.70431642  | 3068560 | 0.65403687  | experimental | Tocris | 388 Ambenonium dichloride                                          |
| 3266 K16 | X | 435    | 440    | -0.20087701 | 355    | 360    | -0.51247816 | 3165754 | 0.44885080  | 3409354 | 1.26287461  | experimental | Tocris | 553 NAN-190 hydrobromide                                           |
| 3266 K17 | X | 480    | 490    | -0.01880602 | 473    | 480    | -0.00724842 | 3245915 | 0.58378415  | 3150322 | 0.47626594  | experimental | Tocris | 391 Pyrogallol hemitartrate                                        |
| 3266 K18 | X | 1115   | 1120   | 3.05723545  | 1233   | 1240   | 2.36885268  | 3333498 | 0.69465459  | 3258644 | 0.93936271  | experimental | Tocris | 554 FS 142                                                         |
| 3266 K19 | X | 312    | 320    | -0.79021206 | 592    | 600    | 0.26528426  | 3077878 | 0.30221851  | 2858064 | 0.27798005  | experimental | Tocris | 393 S(-)-Atenolol                                                  |
| 3266 K20 | X | 474    | 480    | -0.10401467 | 473    | 480    | -0.1252378  | 3270124 | 0.62241317  | 2919832 | 0.38833026  | experimental | Tocris | 556 BP 554 maleate                                                 |
| 3266 K21 | X | 474    | 480    | -0.10401467 | 433    | 440    | -0.25650572 | 3046429 | 0.24983874  | 2950412 | 0.44296226  | experimental | Tocris | 395 N-Acetylglycyl-D-glutamic acid                                 |
| 3266 K22 | P | 671    | 680    | 0.92987967  | 539    | 560    | 0.09135427  | 2925722 | 0.04879561  | 2746718 | 0.0790574   | experimental | Tocris | 557 ?-Methyl-5-hydroxytryptamine maleate                           |
| 3266 K23 | E | 943    | 1320   | 2.23312465  | 978    | 1280   | 1.53201969  | 74968   | -4.69926786 | 75942   | -4.69235645 | empty        |        |                                                                    |
| 3266 K24 | P | 126275 | 126920 | 602.741582  | 100861 | 101520 | 329.383495  | 2863917 | -0.05411018 | 2491716 | -0.37640341 | empty        |        |                                                                    |
| 3266 L01 | N | 556    | 560    | 0.37887536  | 397    | 400    | -0.37464685 | 2737699 | -0.26435656 | 2620955 | 0.56621611  | empty        |        |                                                                    |
| 3266 L02 | E | 274    | 280    | -0.97228305 | 236    | 240    | -0.90300023 | 76107   | -4.6973708  | 75426   | -4.6932783  | empty        |        |                                                                    |
| 3266 L03 | X | 990    | 1000   | 2.45831772  | 674    | 680    | 0.5343835   | 2893959 | -0.00410714 | 2728971 | 0.0473519   | experimental | Tocris | 695 Retinoic acid                                                  |
| 3266 L04 | X | 313    | 320    | -0.78542071 | 353    | 360    | -0.51904156 | 3065439 | 0.28150078  | 2999230 | 0.53017694  | experimental | Tocris | 855 MTPG                                                           |
| 3266 L05 | X | 395    | 400    | -0.39253068 | 395    | 400    | -0.37792855 | 3006283 | 0.18297371  | 2968422 | 0.47513762  | experimental | Tocris | 699 BRL 52537 hydrochloride                                        |
| 3266 L06 | X | 395    | 400    | -0.39253068 | 276    | 280    | -0.77173231 | 2822692 | -0.12280565 | 2577228 | -0.22374109 | experimental | Tocris | 864 GR 46611                                                       |
| 3266 L07 | X | 195    | 200    | -1.35079905 | 156    | 160    | -1.16553607 | 1107059 | -2.98027226 | 1067015 | -2.92177762 | experimental | Tocris | 701 3'-Fluorobenzylspiperone maleate                               |
| 3266 L08 | X | 517    | 520    | 0.19201302  | 276    | 280    | -0.77173231 | 3145497 | 0.4148411   | 3050997 | 0.6226601   | experimental | Tocris | 867 Antiprilocam                                                   |
| 3266 L09 | X | 235    | 240    | -1.15914538 | 395    | 400    | -0.38121024 | 2833329 | -0.10508923 | 2698387 | -0.00728724 | experimental | Tocris | 702 BTCP maleate                                                   |
| 3266 L10 | X | 436    | 440    | -0.19608567 | 435    | 440    | -0.24994232 | 3026165 | 0.2160881   | 2834522 | 0.23592163  | experimental | Tocris | 868 L-732,138                                                      |
| 3266 L11 | X | 355    | 360    | -0.58418436 | 594    | 600    | 0.27184766  | 3190973 | 0.4905835   | 3106571 | 0.72194456  | experimental | Tocris | 703 Aniprilocam hydrochloride                                      |
| 3266 L12 | X | 355    | 360    | -0.58418436 | 392    | 400    | -0.39105534 | 3000179 | 0.17280721  | 3059895 | 0.63855661  | experimental | Tocris | 869 Felbamate                                                      |
| 3266 L13 | X | 395    | 400    | -0.39253068 | 395    | 360    | -0.51247816 | 3066626 | 0.28347778  | 3233177 | 0.94812961  | experimental | Tocris | 705 L-701,252                                                      |
| 3266 L14 | X | 395    | 400    | -0.39253068 | 395    | 400    | -0.38121024 | 3119685 | 0.37185001  | 2782918 | 0.14372968  | experimental | Tocris | 870 MDL 11,939                                                     |
| 3266 L15 | X | 355    | 360    | -0.58418436 | 395    | 400    | -0.38121024 | 3037565 | 0.23057533  | 3050968 | 0.62260829  | experimental | Tocris | 706 7-Hydroxy-DPAT hydrobromide                                    |
| 3266 L16 | X | 395    | 400    | -0.39253068 | 475    | 480    | -0.1186744  | 3004403 | 0.17984248  | 2567355 | -0.24137947 | experimental | Tocris | 871 AMT hydrochloride                                              |
| 3266 L17 | X | 475    | 480    | -0.00922333 | 514    | 520    | 0.00931182  | 3206636 | 0.51667095  | 2766789 | 0.11491479  | experimental | Tocris | 713 Cyclothiazide                                                  |
| 3266 L18 | X | 513    | 520    | 0.17284766  | 752    | 760    | 0.79035594  | 3042949 | 0.24404264  | 2733531 | 0.05549847  | experimental | Tocris | 873 ET hydrobromide                                                |
| 3266 L19 | X | 475    | 480    | -0.00922333 | 474    | 480    | -0.1219561  | 2657144 | -0.39853355 | 2353744 | -0.62300132 | experimental | Tocris | 719 7-Hydroxy-PIPAT maleate                                        |
| 3266 L20 | X | 554    | 560    | 0.36929267  | 635    | 640    | 0.40639728  | 2981217 | 0.14122512  | 2834763 | 0.23635218  | experimental | Tocris | 875 m-CPP hydrochloride                                            |
| 3266 L21 | X | 273    | 280    | -0.97707439 | 221    | 240    | -0.9522257  | 948678  | -3.24406319 | 1003092 | -3.0359778  | experimental | Tocris | 723 Tetrindole mesylate                                            |
| 3266 L22 | X | 672    | 680    | 0.93467101  | 4671   | 4680   | 0.93467101  | 2026143 | -1.44494508 | 1799109 | -1.61387181 | experimental | Tocris | 876 AM 92016 hydrochloride                                         |
| 3266 L23 | X | 1003   | 1320   | 5.20605167  | 1020   | 1360   | 1.66989101  | 77975   | -0.69425956 | 78942   | -0.79171552 | empty        |        |                                                                    |
| 3266 L24 | P | 105520 | 106240 | 503.297282  | 109647 | 110280 | 358.15086   | 2991506 | 0.15836192  | 2808794 | 0.18995786  | empty        |        |                                                                    |
| 3266 M01 | N | 556    | 560    | 0.37887536  | 357    | 360    | -0.50591477 | 3136515 | 0.39988116  | 3052331 | 0.62504332  | empty        |        |                                                                    |
| 3266 M02 | E | 189    | 200    | -1.3795471  | 195    | 200    | -1.03754984 | 76487   | -4.6967379  | 77835   | -4.68897455 | empty        |        |                                                                    |
| 3266 M03 | X | 2714   | 2720   | 10.7185911  | 954    | 960    | 1.45325894  | 2473564 | -0.70429458 | 2491556 | -0.37679644 | experimental | Tocris | 396 H-9 dihydrochloride                                            |
| 3266 M04 | X | 388    | 400    | -0.42607007 | 754    |        |             |         |             |         |             |              |        |                                                                    |

|          |   |        |        |             |        |        |             |         |             |         |             |              |        |                                                                              |
|----------|---|--------|--------|-------------|--------|--------|-------------|---------|-------------|---------|-------------|--------------|--------|------------------------------------------------------------------------------|
| 3266 M19 | X | 193    | 200    | -1.36038174 | 234    | 240    | -0.90956362 | 884005  | -3.35177908 | 971587  | -3.09226234 | experimental | Tocris | 421 GBR 12909 dihydrochloride                                                |
| 3266 M20 | X | 795    | 800    | 1.52400606  | 553    | 560    | 0.13729804  | 2575870 | -0.53389918 | 2913731 | 0.37743066  | experimental | Tocris | 579 Tyrphostin B44, (+) enantiomer                                           |
| 3266 M21 | X | 553    | 560    | 0.36450133  | 633    | 640    | 0.39983388  | 2798519 | -0.16306691 | 2262658 | -0.78572894 | experimental | Tocris | 424 Benzothiazine dibromide                                                  |
| 3266 M22 | X | 551    | 560    | 0.35491865  | 899    | 920    | 1.27276555  | 2939615 | 0.07193505  | 3113389 | 0.73502551  | experimental | Tocris | 581 3-[2-(4-{2-Methoxyphenyl}piperazin-1-yl)-ethyl]pyrimido[5,4-b] imidazole |
| 3266 M23 | E | 1042   | 1400   | 2.70746275  | 976    | 1320   | 1.52455633  | 76397   | -4.69688779 | 76887   | -6.6946426  | empty        |        |                                                                              |
| 3266 M24 | P | 119588 | 120280 | 570.701879  | 114978 | 115600 | 375.645592  | 2343934 | -0.92019938 | 2502282 | -0.35763415 | empty        |        |                                                                              |
| 3266 N01 | N | 476    | 480    | -0.00443199 | 317    | 320    | -0.63718269 | 2282072 | -1.02323342 | 2190444 | -0.91474121 | empty        |        |                                                                              |
| 3266 N02 | E | 157    | 160    | -1.53287004 | 175    | 160    | -1.16225437 | 73955   | -4.70095506 | 72891   | -4.69780715 | empty        |        |                                                                              |
| 3266 N03 | X | 389    | 400    | -0.42127873 | 257    | 280    | -0.775014   | 2791016 | -0.1755635  | 2802655 | 0.17899037  | experimental | Tocris | 724 Pirlindole mesylate                                                      |
| 3266 N04 | X | 556    | 560    | 0.37887536  | 356    | 360    | -0.50919647 | 2680077 | -0.36033757 | 2492443 | -0.37521179 | experimental | Tocris | 877 Luzindole                                                                |
| 3266 N05 | X | 394    | 400    | -0.39732202 | 276    | 280    | -0.77173231 | 3625629 | -1.2145233  | 3142277 | 0.78573429  | experimental | Tocris | 725 BU 224 hydrochloride                                                     |
| 3266 N06 | X | 394    | 400    | -0.39732202 | 395    | 400    | -0.38210224 | 2481540 | -0.69101018 | 2452070 | -0.46407723 | experimental | Tocris | 878 Oxleamide                                                                |
| 3266 N07 | X | 354    | 360    | -0.5889757  | 595    | 600    | 0.27512936  | 3341152 | 0.74071361  | 3293689 | 1.05623594  | experimental | Tocris | 726 BU 239 hydrochloride                                                     |
| 3266 N08 | X | 394    | 400    | -0.39732202 | 435    | 440    | -0.24994232 | 2662285 | -0.38997097 | 2451213 | -0.44887031 | experimental | Tocris | 879 Palmitylolethanolamide                                                   |
| 3266 N09 | X | 716    | 720    | 1.14549005  | 355    | 360    | -0.51247816 | 3483194 | 0.97729117  | 3421127 | 1.28390739  | experimental | Tocris | 727 Pyrolidinedithiocarbamate ammonium                                       |
| 3266 N10 | X | 435    | 440    | -0.20087701 | 475    | 480    | -0.1186744  | 2421612 | -1.27082306 | 2407601 | -0.52678433 | experimental | Tocris | 880 ODO                                                                      |
| 3266 N11 | X | 394    | 400    | -0.39732202 | 274    | 280    | -0.7782957  | 3573194 | -1.12719036 | 3149846 | 0.79925652  | experimental | Tocris | 728 RS 23597-190 hydrochloride                                               |
| 3266 N12 | X | 355    | 360    | -0.58418436 | 395    | 400    | -0.38121024 | 2534237 | -0.60324088 | 2477498 | -0.40191144 | experimental | Tocris | 881 Chlormethiazole hydrochloride                                            |
| 3266 N13 | X | 435    | 440    | -0.20087701 | 475    | 480    | -0.1186744  | 3121721 | 0.37524107  | 3145208 | 0.79097061  | experimental | Tocris | 729 Imetit dihydrobromide                                                    |
| 3266 N14 | X | 475    | 480    | -0.00922333 | 315    | 320    | -0.64374608 | 2841902 | -0.0908105  | 2456124 | -0.44009667 | experimental | Tocris | 882 ZM 226600                                                                |
| 3266 N15 | X | 355    | 360    | -0.58418436 | 395    | 400    | -0.38121024 | 3136922 | -0.40055904 | 3047771 | 0.61689676  | experimental | Tocris | 730 4-Phenyl-1,2,3,4-tetrahydroisoquinoline hydrochloride                    |
| 3266 N16 | X | 434    | 440    | -0.20566835 | 495    | 600    | 0.27512936  | 2275266 | -1.03456913 | 2186844 | -0.92117271 | experimental | Tocris | 883 BU 1063 dihydrochloride                                                  |
| 3266 N17 | X | 395    | 400    | -0.39253068 | 575    | 480    | -0.1186744  | 3192970 | 0.49390959  | 3265691 | 1.00621676  | experimental | Tocris | 731 Sulfoxazole                                                              |
| 3266 N18 | X | 474    | 480    | -0.01401467 | 374    | 480    | 0.5343835   | 2640271 | -0.42663632 | 2373704 | -0.58734224 | experimental | Tocris | 884 Dihydroxymethylene hydrochloride                                         |
| 3266 N19 | X | 515    | 520    | 0.18243034  | 553    | 560    | 0.13729804  | 3279187 | 0.63750802  | 3109886 | 0.72786689  | experimental | Tocris | 735 3-Bromo-7-nitroindazole                                                  |
| 3266 N20 | X | 803    | 800    | 0.16805632  | 1053   | 1030   | 1.72251308  | 1995936 | -1.49980625 | 1830161 | -1.37501385 | experimental | Tocris | 885 Guanabenz acetate                                                        |
| 3266 N21 | X | 873    | 880    | -0.89773072 | 791    | 800    | -0.91842416 | 2835011 | -1.02287768 | 2692871 | -0.60994181 | experimental | Tocris | 736 2-(1-(4-Piperonyl)piperazinyl)benzothiazole                              |
| 3266 N22 | X | 590    | 600    | 0.54178098  | 500    | 560    | 0.12745295  | 2721859 | -0.2907477  | 2310058 | -0.70104755 | experimental | Tocris | 888 Cirazoline hydrochloride                                                 |
| 3266 N23 | E | 930    | 1320   | 2.17083721  | 692    | 1000   | 0.59345406  | 75080   | -4.69980132 | 73517   | -4.69668878 | empty        |        |                                                                              |
| 3266 N24 | P | 130770 | 131480 | 624.278663  | 102667 | 103320 | 335.244608  | 3146666 | 0.41678813  | 2994744 | 0.52216258  | empty        |        |                                                                              |
| 3266 O01 | N | 556    | 560    | 0.37887536  | 477    | 480    | -0.11211101 | 2763177 | -0.22193065 | 2780358 | 0.13915617  | empty        |        |                                                                              |
| 3266 O02 | E | 116    | 120    | -1.72931506 | 197    | 200    | -1.03098645 | 78759   | -4.69295377 | 76338   | -4.69164899 | empty        |        |                                                                              |
| 3266 O03 | X | 475    | 480    | -0.00922333 | 317    | 320    | -0.63718269 | 2898052 | 0.00270994  | 2758093 | 0.09937915  | experimental | Tocris | 425 UK 14,304                                                                |
| 3266 O04 | X | 514    | 520    | 0.94904504  | 515    | 520    | 0.96919334  | 2104131 | -0.79514827 | 2194    | -0.37158913 | experimental | Tocris | 582 Methyl dihydroin maleate                                                 |
| 3266 O05 | X | 436    | 440    | -0.19608567 | 356    | 360    | -0.50919647 | 2527452 | -0.61454161 | 2591295 | -0.19861001 | experimental | Tocris | 426 L-693,403 maleate                                                        |
| 3266 O06 | X | 435    | 440    | -0.20087701 | 395    | 400    | -0.38121024 | 3070112 | 0.28928388  | 3042945 | 0.60827498  | experimental | Tocris | 583 Minoxidil                                                                |
| 3266 O07 | X | 554    | 560    | 0.36929267  | 473    | 480    | -0.1252378  | 2215390 | -1.1342954  | 2352845 | -0.62460741 | experimental | Tocris | 427 Bromocriptin mesylate                                                    |
| 3266 O08 | X | 435    | 440    | -0.20087701 | 355    | 360    | -0.51247816 | 2963499 | 0.11171496  | 3027650 | 0.58095005  | experimental | Tocris | 584 L(-)-7-Methylopa                                                         |
| 3266 O09 | X | 234    | 240    | -1.16393672 | 354    | 360    | -0.51575986 | 2046464 | -1.41564951 | 2113045 | -1.05301662 | experimental | Tocris | 430 SC-10                                                                    |
| 3266 O10 | X | 355    | 360    | -0.58418436 | 315    | 320    | -0.64374608 | 2789368 | -0.17830832 | 2868532 | 0.29668142  | experimental | Tocris | 588 S-Methylfurmethiodide                                                    |
| 3266 O11 | X | 600    | 600    | 0.94904504  | 514    | 520    | 1.5247816   | 2400701 | -0.8255513  | 1870265 | -0.97158913 | experimental | Tocris | 431 M1 9 hydrochloride                                                       |
| 3266 O12 | X | 435    | 440    | -0.20087701 | 314    | 520    | 0.00913182  | 2922730 | 0.0438123   | 2952428 | 0.44656329  | experimental | Tocris | 589 PDE-084 hydrochloride                                                    |
| 3266 O13 | X | 395    | 400    | -0.39253068 | 753    | 760    | 0.79363764  | 1960160 | -1.55939284 | 1979480 | -1.29163412 | experimental | Tocris | 432 MY-5445                                                                  |
| 3266 O14 | X | 275    | 280    | -0.9674917  | 434    | 440    | -0.25322402 | 1176875 | -2.86399047 | 1585573 | -1.99535967 | experimental | Tocris | 590 Methylgoline                                                             |
| 3266 O15 | X | 355    | 360    | -0.58418436 | 432    | 480    | -0.1285195  | 2358964 | -0.89516622 | 2163423 | -0.96301496 | experimental | Tocris | 433 SC-9                                                                     |
| 3266 O16 | X | 754    | 760    | 1.32756104  | 673    | 640    | 0.39983388  | 2530879 | -0.60883378 | 2511732 | -0.34075147 | experimental | Tocris | 593 NPPB                                                                     |
| 3266 O17 | X | 554    | 560    | 0.36929267  | 353    | 360    | -0.51904156 | 2967950 | 0.11912831  | 2878955 | 0.31530239  | experimental | Tocris | 435 Cimeterol                                                                |
| 3266 O18 | X | 510    | 520    | 0.177639    | 754    | 760    | 0.79691934  | 2039909 | -1.42656717 | 1870265 | -1.48708913 | experimental | Tocris | 597 Nalfopadol hydrochloride                                                 |
| 3266 O19 | X | 514    | 520    | 0.177639    | 473    | 480    | -0.1252378  | 2877448 | -0.03160698 | 2692651 | -0.01753476 | experimental | Tocris | 589 Etazolate hydrochloride                                                  |
| 3266 O20 | X | 475    | 480    | -0.00922333 | 553    | 560    | 0.13729804  | 2832283 | -0.10683139 | 2883510 | 0.32344002  | experimental | Tocris | 599 Naloxone hydrochloride                                                   |
| 3266 O21 | X | 592    | 600    | 0.55136366  | 711    | 720    | 0.65580632  | 2869950 | -0.04409525 | 2820160 | 0.21026353  | experimental | Tocris | 438 DPCPX                                                                    |
| 3266 O22 | X | 592    | 600    | 0.55136366  | 831    | 840    | 1.04961009  | 2757516 | -0.23135931 | 2710490 | 0.01433509  | experimental | Tocris | 600 Nimodipine                                                               |
| 3266 O23 | E | 753    | 1120   | 1.3227697   | 954    | 1280   | 1.45325894  | 74506   | -4.70003734 | 75547   | -4.69306213 | empty        |        |                                                                              |
| 3266 O24 | P | 122837 | 123680 | 586.268949  | 108044 | 108920 | 352.890298  | 2749297 | -0.24504844 | 2557325 | -0.25929834 | empty        |        |                                                                              |
| 3266 P01 | N | 718    | 720    | 1.15507274  | 358    | 360    | -0.50265307 | 2292297 | -1.00620321 | 2346079 | -0.63669505 | empty        |        |                                                                              |
| 3266 P02 | E | 195    | 200    | -1.35079905 | 237    | 240    | -0.89971853 | 71329   | -4.70532878 | 70812   | -4.70152134 | empty        |        |                                                                              |
| 3266 P03 | X | 837    | 840    | 1.72524242  | 557    | 560    | 0.15042483  | 2758000 | -0.28418379 | 2714894 | 0.02220296  | experimental | Tocris | 737 2-Iodometolatin                                                          |
| 3266 P04 | X | 516    | 520    | 0.18722168  | 356    | 360    | -0.50919647 | 2438189 | -0.76321329 | 2444915 | -0.46012186 | experimental | Tocris | 889 RS 45041-190 hydrochloride                                               |
| 3266 P05 | X | 236    | 240    | -1.15435404 | 636    | 640    | 0.40967897  | 2096083 | -1.33300676 | 2145199 | -0.99557263 | experimental | Tocris | 740 Naltrindole hydrochloride                                                |
| 3266 P06 | X | 435    | 440    | -0.20087701 | 634    | 640    | 0.40311558  | 2585929 | -0.51714545 | 2478049 | -0.40092706 | experimental | Tocris | 890 Amiloride hydrochloride                                                  |
| 3266 P07 | X | 916    | 920    | 2.10375842  | 956    | 960    | 1.45982234  | 1241483 | -2.75638283 | 1316700 | -2.47570859 | experimental | Tocris | 741 GF 109203X                                                               |
| 3266 P08 | X | 475    | 480    | -0.00922333 | 313    | 320    | -0.65030948 | 2601346 | -0.49146772 | 2699444 | -0.00539889 | experimental | Tocris | 891 Rauwolfoscine hydrochloride                                              |
| 3266 P09 | X | 477    | 480    | 0.00035935  | 1037   | 1040   | 1.72563987  | 2726466 | -0.28307453 | 2806890 | 0.18655631  | experimental | Tocris | 742 L-695,580                                                                |
| 3266 P10 | X | 316    | 320    | -0.77104669 | 474    | 480    | -0.1219561  | 2268638 | -1.04560837 | 2209032 | -0.88153324 | experimental | Tocris | 892 Naltriben mesylate                                                       |
| 3266 P11 | X | 596    | 600    | 0.57052903  | 555    | 560    | 0.14714313  | 2618460 | -0.46296355 | 2511578 | -0.34102566 | experimental | Tocris | 743 DPPE fumarate                                                            |
| 3266 P12 | X | 396    | 400    | -0.38773934 | 594    | 600    | 0.27184766  | 2624048 | -0.45365648 | 2667165 | -0.06306662 | experimental | Tocris | 894 (RS)-(-)-Sulpiride                                                       |
| 3266 P13 | X | 436    | 440    | -0.19129432 | 914    | 920    | 1.32199102  | 1715120 | -1.96751837 | 1740997 | -1.71769048 | experimental | Tocris | 744 Ceramide                                                                 |
| 3266 P14 | X | 437    | 440    | -0.19129432 | 1234   | 1240   | 0.39655218  | 2638260 | -0.42998573 | 2526648 | -0.31410363 | experimental | Tocris | 895 (S)-(-)-Sulpiride                                                        |
| 3266 P15 | X | 396    | 400    | -0.38773934 | 634    | 1240   | 2.37213438  | 2526247 | -0.61654886 | 2504767 | -0.35319463 | experimental | Tocris | 748 4-IBP                                                                    |
| 3266 P16 | X | 515    | 520    | 0.177639    | 515    | 520    | 0.177639    | 2738077 | -1.26373587 | 2602950 | -0.17788804 | experimental | Tocris | 896 GR 135531                                                                |
| 3266 P17 | X | 515    | 520    | 0.18243034  | 515    | 520    | 0.18243034  | 580134  | -0.52109729 | 2452666 | -0.44418425 | experimental | Tocris | 750 PG-9 maleate                                                             |
| 3266 P18 | X | 595    | 600    | 0.56573769  | 555    | 560    | 0.14386144  | 2728157 | -0.28025809 | 2545269 | -0.28083671 | experimental | Tocris | 897 S-Isopropylisothiourea hydrobromide                                      |
| 3266 P19 | X | 636    | 640    | 0.76218271  | 436    | 440    | -0.24666063 | 2532319 | -0.6064354  | 2281558 | -0.75196357 | experimental | Tocris | 751 SM-21 maleate                                                            |
| 3266 P20 | X | 195    | 200    | -1.35079905 | 195    | 200    | -1.03754984 | 1354831 | -2.56759647 | 1263391 | -2.57094657 | experimental | Tocris | 899 BNTX maleate                                                             |
| 3266 P21 | X | 677    | 680    | 0.95862772  | 756    | 760    | 0.80348273  | 1965628 | -1.55028563 | 2097745 | -1.08035049 | experimental | Tocris | 752 Clobenpropit dihydrobromide                                              |
| 3266 P22 |   |        |        |             |        |        |             |         |             |         |             |              |        |                                                                              |

|          |   |        |        |            |             |        |            |             |             |             |             |              |              |        |                                                              |  |
|----------|---|--------|--------|------------|-------------|--------|------------|-------------|-------------|-------------|-------------|--------------|--------------|--------|--------------------------------------------------------------|--|
| 3267 A13 | X |        | 553    | 560        | -0.27245068 | 751    | 760        | -0.13316531 | 3055719     | -0.06299995 | 3730336     | 0.12122497   | experimental | Tocris | 909 Tropicamide                                              |  |
| 3267 A14 | X |        | 1154   | 1160       | 1.51118034  | 1472   | 1480       | 1.77990438  | 2822617     | -0.35367158 | 3497933     | -0.15859433  | experimental | Tocris | 1036 ZN 241385                                               |  |
| 3267 A15 | X |        | 634    | 640        | -0.03206114 | 673    | 680        | -0.34012707 | 3154313     | 0.05994399  | 4036390     | 0.48972201   | experimental | Tocris | 911 Gibencilamide                                            |  |
| 3267 A16 | X |        | 554    | 560        | -0.26948939 | 514    | 520        | -0.76201068 | 1996742     | -1.38102049 | 2431869     | -1.444216334 | experimental | Tocris | 1038 WIN 55,212-2 mesylate                                   |  |
| 3267 A17 | X |        | 873    | 880        | 0.67723639  | 792    | 800        | -0.02437771 | 3587037     | 0.59953862  | 3481438     | -0.17845475  | experimental | Tocris | 912 RU 24989 hemisuccinate                                   |  |
| 3267 A18 | X |        | 1432   | 1440       | 2.33622098  | 1111   | 1120       | 0.82204286  | 4178267     | 1.33678578  | 3909270     | 0.3366662    | experimental | Tocris | 1041 L-EBIO                                                  |  |
| 3267 A19 | X |        | 1151   | 1160       | 1.50227702  | 1073   | 1080       | 0.72121533  | 4222651     | 1.39213137  | 4094239     | 0.55937372   | experimental | Tocris | 914 (R)-Bisoprolol hemifumarate                              |  |
| 3267 A20 | X |        | 750    | 760        | 0.31220042  | 592    | 600        | -0.55504891 | 4133150     | 1.28052615  | 3584264     | -0.05464955  | experimental | Tocris | 1042 N-Methylglucosamine iodide                              |  |
| 3267 A21 | X |        | 1351   | 1360       | 2.09583144  | 868    | 880        | 0.17727735  | 3880761     | 0.96580418  | 4161294     | 0.6401097    | experimental | Tocris | 915 Clotamide                                                |  |
| 3267 A22 | X |        | 628    | 640        | -0.04986777 | 1227   | 1240       | 1.12983216  | 3785293     | 0.84675827  | 4043211     | 0.49793467   | experimental | Tocris | 1043 QX 222                                                  |  |
| 3267 A23 | E |        | 1487   | 2080       | 2.49944844  | 1692   | 2440       | 2.36364271  | 67954       | -3.78865872 | 68359       | -4.28789134  | empty        |        |                                                              |  |
| 3267 A24 | P | 201934 | 202440 | 597.380457 | 254601      | 252000 | 673.42126  | 2561573     | -0.67918609 |             | 5108402     | 1.78045256   | empty        |        |                                                              |  |
| 3267 B01 | N |        | 675    | 680        | 0.08961752  | 675    | 680        | -0.33482036 | 2460592     | -0.80510655 | 3445449     | -0.22178645  | empty        |        |                                                              |  |
| 3267 B02 | E |        | 195    | 200        | -1.33491308 | 234    | 240        | -1.50495037 | 72157       | -3.7834177  | 72206       | -4.28325945  | empty        |        |                                                              |  |
| 3267 B03 | X |        | 634    | 640        | -0.03206114 | 471    | 880        | 0.18523742  | 2545510     | -0.6992162  | 2608003     | -1.23009338  | experimental | Tocris | 1147 SKF 96365 hydrochloride                                 |  |
| 3267 B04 | X |        | 594    | 600        | -0.15077202 | 872    | 480        | -0.87345163 | 2948278     | -0.19697585 | 3579625     | -0.06023502  | experimental | Tocris | 1355 P1075                                                   |  |
| 3267 B05 | X |        | 434    | 440        | -0.62561555 | 554    | 560        | -0.65587644 | 3359340     | 0.31560688  | 4020854     | 0.47101626   | experimental | Tocris | 1148 Siguazodan                                              |  |
| 3267 B06 | X |        | 431    | 440        | -0.63451887 | 548    | 560        | -0.67179658 | 3031364     | -0.09336995 | 3931407     | 0.36331973   | experimental | Tocris | 1356 MG 624                                                  |  |
| 3267 B07 | X |        | 474    | 480        | -0.50690467 | 1673   | 1680       | 2.31322894  | 3922595     | 1.01797     | 5108402     | 1.78045256   | experimental | Tocris | 1202 SB 203580                                               |  |
| 3267 B08 | X |        | 353    | 360        | -0.86600509 | 750    | 760        | -0.13581866 | 3032765     | -0.09162294 | 3842285     | 0.2560145    | experimental | Tocris | 1357 U 99194 maleate                                         |  |
| 3267 B09 | X |        | 313    | 320        | -0.98471597 | 431    | 440        | -0.98223923 | 3327837     | 0.27632353  | 4149762     | 0.62622487   | experimental | Tocris | 1205 SR 57227 hydrochloride                                  |  |
| 3267 B10 | X |        | 434    | 440        | -0.62561555 | 513    | 1120       | 0.82734957  | 3268179     | 0.20193168  | 3941303     | 0.37523477   | experimental | Tocris | 3861 PO 123319 difluorocetate                                |  |
| 3267 B11 | X |        | 393    | 400        | -0.74729421 | 1151   | 560        | -0.66383651 | 3689503     | 0.72731084  | 4100052     | 0.56637273   | experimental | Tocris | 1206 SC 19220                                                |  |
| 3267 B12 | X |        | 674    | 680        | 0.08664974  | 672    | 680        | -0.34278043 | 3431427     | 0.40549734  | 3568441     | -0.07370085  | experimental | Tocris | 1363 PO 81723                                                |  |
| 3267 B13 | X |        | 392    | 400        | -0.75026198 | 790    | 800        | -0.02968442 | 2622143     | -0.60365701 | 3293393     | -0.40486586  | experimental | Tocris | 2207 BRL 15572 hydrochloride                                 |  |
| 3267 B14 | X |        | 640    | 650        | -0.58582555 | 430    | 440        | -0.17451799 | 3015144     | -0.10860795 | 3015144     | -0.10860795  | experimental | Tocris | 849 3-((1S)-1-phenylethoxy)propane                           |  |
| 3267 B15 | X |        | 312    | 320        | -0.98768375 | 552    | 560        | -0.66118315 | 3371793     | 0.33113542  | 3934205     | 0.36668859   | experimental | Tocris | 1209 LU 341495                                               |  |
| 3267 B16 | X |        | 594    | 600        | -0.15077202 | 1151   | 520        | -0.76997075 | 1699418     | -1.75426908 | 2216071     | -1.70198979  | experimental | Tocris | 1387 ZN 38923 hydrochloride                                  |  |
| 3267 B17 | X |        | 472    | 480        | -0.51284021 | 1151   | 1160       | 0.9281771   | 3231435     | 0.15611295  | 4061054     | 0.51941811   | experimental | Tocris | 1210 FR 139317                                               |  |
| 3267 B18 | X |        | 790    | 800        | 0.4309113   | 1310   | 1320       | 1.35006071  | 3233592     | 0.15880267  | 3956719     | 0.39379604   | experimental | Tocris | 1371 SB 200646 hydrochloride                                 |  |
| 3267 B19 | X |        | 750    | 760        | 0.31220042  | 629    | 640        | -0.45687474 | 2786418     | -0.39881071 | 3083161     | -0.65799069  | experimental | Tocris | 1211 ZD 7155 hydrochloride                                   |  |
| 3267 B20 | X |        | 789    | 800        | 0.42794353  | 947    | 960        | 0.38689247  | 3173208     | 0.08350552  | 3609730     | -0.02398781  | experimental | Tocris | 1375 SB 228357                                               |  |
| 3267 B21 | X |        | 1551   | 1560       | 2.68938585  | 2230   | 2240       | 3.79114825  | 4024983     | 1.14564495  | 3805047     | 0.21117897   | experimental | Tocris | 1212 MPEP hydrochloride                                      |  |
| 3267 B22 | E |        | 686    | 690        | -0.17445104 | 974    | 980        | -0.14979192 | 3423692     | 0.14609593  | 3423692     | 0.14609593   | experimental | Tocris | 1376 SB 218795                                               |  |
| 3267 B23 | E |        | 1288   | 1800       | 1.9088618   | 1153   | 1760       | 0.93348381  | 71584       | -3.78413221 | 74038       | -4.28105367  | empty        |        |                                                              |  |
| 3267 B24 | P | 171640 | 172720 | 507.47477  | 203242      | 204480 | 537.147548 | 2829595     | -0.34497021 | 3117310     | -0.6168744  |              | empty        |        |                                                              |  |
| 3267 C01 | N |        | 517    | 520        | -0.37929047 | 596    | 600        | -0.54443549 | 3366406     | 0.32441798  | 3854904     | 0.27120811   | empty        |        |                                                              |  |
| 3267 C02 | E |        | 156    | 160        | -1.45065619 | 235    | 240        | -1.50229701 | 74256       | -3.78800083 | 75022       | -4.27986891  | empty        |        |                                                              |  |
| 3267 C03 | X |        | 554    | 560        | -0.26948929 | 790    | 800        | -0.02968442 | 2706789     | -0.49810583 | 3880784     | 0.30236831   | experimental | Tocris | 916 Remoxipride hydrochloride                                |  |
| 3267 C04 | X |        | 435    | 440        | -0.62624778 | 753    | 760        | -0.12785859 | 2867641     | -0.29752792 | 4162625     | 0.64171226   | experimental | Tocris | 1044 NBQX disodium salt                                      |  |
| 3267 C05 | X |        | 916    | 920        | -0.46252728 | 712    | 720        | -0.98489245 | 13313916    | -2.23497921 | 3641460     | -2.5558024   | experimental | Tocris | 917 3-(4-(4-chlorophenyl)phenylmethoxy)tropane hydrochloride |  |
| 3267 C06 | X |        | 916    | 920        | 0.80485059  | 712    | 720        | -0.23664619 | 4124582     | 1.26984209  | 3985137     | 0.428011206  | experimental | Tocris | 1045 CNQX disodium salt                                      |  |
| 3267 C07 | X |        | 472    | 480        | -0.51284021 | 466    | 480        | -0.88937177 | 2541443     | -0.70428763 | 2003569     | -1.95784776  | experimental | Tocris | 918 3'-Bis-(4-fluorophenyl) methoxytropane hydrochloride     |  |
| 3267 C08 | X |        | 794    | 800        | 0.44278239  | 792    | 800        | -0.02437771 | 4020987     | 1.14066205  | 4505234     | 1.05422248   | experimental | Tocris | 1046 Zardaverine                                             |  |
| 3267 C09 | X |        | 713    | 720        | 0.20239286  | 671    | 680        | -0.34543379 | 3966400     | 1.07259336  | 4063451     | 0.52230416   | experimental | Tocris | 919 TRIM                                                     |  |
| 3267 C10 | X |        | 715    | 720        | 0.20832884  | 751    | 760        | -0.13316531 | 4200094     | 1.36400343  | 4781170     | 1.38645666   | experimental | Tocris | 1047 ICI 182,780                                             |  |
| 3267 C11 | X |        | 354    | 360        | -0.86303732 | 552    | 560        | -0.66118315 | 2253090     | -1.0638557  | 2859641     | -0.92711463  | experimental | Tocris | 921 SB 205607 dihydrobromide                                 |  |
| 3267 C12 | X |        | 674    | 680        | -0.78704625 | 434    | 440        | -0.17451799 | 3015144     | -0.10860795 | 3015144     | -0.10860795  | experimental | Tocris | 1048 1-6CP                                                   |  |
| 3267 C13 | X |        | 514    | 520        | -0.38819379 | 672    | 680        | -0.34278043 | 3454316     | 0.43403925  | 4057289     | 0.51488495   | experimental | Tocris | 922 SKF 38393 hydrobromide                                   |  |
| 3267 C14 | X |        | 633    | 640        | -0.03502891 | 711    | 720        | -0.23929955 | 3533637     | 0.53295033  | 4543618     | 1.10043782   | experimental | Tocris | 1049 CHPG                                                    |  |
| 3267 C15 | X |        | 634    | 640        | -0.03206114 | 512    | 520        | -0.76731739 | 3527220     | 0.52494851  | 4159020     | 0.63737175   | experimental | Tocris | 924 (+)-MK 801 maleate                                       |  |
| 3267 C16 | X |        | 673    | 680        | 0.08368197  | 834    | 840        | 0.08706324  | 3565197     | 0.52730476  | 4334548     | 0.84871206   | experimental | Tocris | 1050 RS 102221 hydrochloride                                 |  |
| 3267 C17 | X |        | 633    | 640        | -0.03502891 | 630    | 640        | -0.45422138 | 3060715     | -0.05677008 | 3078335     | -0.66380133  | experimental | Tocris | 925 SCH 23390 hydrochloride                                  |  |
| 3267 C18 | X |        | 712    | 720        | 0.19942508  | 631    | 640        | -0.45156803 | 4195835     | 1.35869258  | 4247975     | 0.74447559   | experimental | Tocris | 1052 A 81603 hydrobromide                                    |  |
| 3267 C19 | X |        | 632    | 640        | -0.03799668 | 511    | 520        | -0.76997075 | 3211243     | 0.1309341   | 3492646     | -0.16496002  | experimental | Tocris | 926 7-Funaltrexamine hydrochloride                           |  |
| 3267 C20 | X |        | 674    | 680        | 0.08664974  | 872    | 880        | 0.18789077  | 3223402     | 0.14609603  | 3447016     | -0.21389974  | experimental | Tocris | 1054 GR 5562 dihydrochloride                                 |  |
| 3267 C21 | X |        | 387    | 400        | -0.76510084 | 505    | 520        | -0.78589089 | 1559228     | -1.92908206 | 1448630     | -2.62600887  | experimental | Tocris | 927 Fluoxetine hydrochloride                                 |  |
| 3267 C22 | X |        | 831    | 840        | 0.55258996  | 828    | 840        | 0.07114311  | 2912316     | -0.24181945 | 3233133     | -0.47742047  | experimental | Tocris | 1057 WIN 64338 hydrochloride                                 |  |
| 3267 C23 | E |        | 979    | 1480       | 0.99182023  | 1293   | 1800       | 1.30495366  | 72717       | -3.78271939 | 70771       | -4.28498723  | empty        |        |                                                              |  |
| 3267 C24 | P | 167936 | 168840 | 496.482142 | 169322      | 170520 | 447.145712 | 3077338     | -0.03604167 | 3077338     | -0.03604167 | 3059443      | -0.68654779  | empty  |                                                              |  |
| 3267 D01 | N |        | 316    | 320        | -0.97581266 | 556    | 560        | -0.65056973 | 2880172     | -0.28190211 | 3397898     | -0.2790391   | empty        |        |                                                              |  |
| 3267 D02 | E |        | 236    | 240        | -1.21323442 | 192    | 200        | -1.61639132 | 76326       | -3.77821907 | 73730       | -4.28142451  | empty        |        |                                                              |  |
| 3267 D03 | X |        | 835    | 840        | 0.56446105  | 843    | 1680       | 2.31322894  | 2793585     | -0.38987366 | 3641401     | 0.01414449   | experimental | Tocris | 1213 PD 98059                                                |  |
| 3267 D04 | X |        | 552    | 560        | -0.27541845 | 706    | 720        | -0.25256633 | 3431697     | 0.40583402  | 4112035     | 0.58080057   | experimental | Tocris | 1377 Cromakalim                                              |  |
| 3267 D05 | X |        | 1075   | 1080       | 1.27672635  | 1471   | 1480       | 1.77725103  | 3645439     | 0.67236427  | 4182710     | 0.66589513   | experimental | Tocris | 1214 SB 1893                                                 |  |
| 3267 D06 | X |        | 350    | 360        | -0.87490841 | 1227   | 1240       | 1.12983216  | 3251922     | 0.18165966  | 3902843     | 0.32892792   | experimental | Tocris | 1378 Levromakalim                                            |  |
| 3267 D07 | X |        | 715    | 720        | 0.20832884  | 1671   | 1680       | 2.30792223  | 3737770     | 0.78749843  | 4521671     | 1.07401306   | experimental | Tocris | 1215 SB 1757                                                 |  |
| 3267 D08 | X |        | 432    | 440        | -0.63155111 | 668    | 680        | -0.35339385 | 3430474     | 0.40430988  | 4110000     | 0.57835038   | experimental | Tocris | 1379 SB 221284                                               |  |
| 3267 D09 | X |        | 514    | 520        | -0.38819379 | 1072   | 1080       | 1.71856198  | 3664665     | 0.69633855  | 4300505     | 0.80772339   | experimental | Tocris | 1217 MRS 1220                                                |  |
| 3267 D10 | X |        | 320    | 360        | -0.98471597 | 640    | 640        | -0.45422138 | 3728180     | 0.77553997  | 4846600     | 1.02937786   | experimental | Tocris | 1380 PMPA (MAALADase inhibitor)                              |  |
| 3267 D11 | X |        | 516    | 520        | -0.38225824 | 993    | 1000       | 0.50894685  | 3502836     | 0.49459235  | 4315042     | 0.82523532   | experimental | Tocris | 1218 DH 97                                                   |  |
| 3267 D12 | X |        | 234    | 240        | -1.21916997 | 312    | 320        | -1.2979886  | 1219076     | -1.20602794 | 2235456     | -1.67864974  | experimental | Tocris | 1381 GW 5074                                                 |  |
| 3267 D13 | X |        | 514    | 520        | -0.38819379 | 634    | 640        | -0.4436079  |             |             |             |              |              |        |                                                              |  |

|          |   |        |        |             |        |        |             |         |              |         |             |              |        |                                          |
|----------|---|--------|--------|-------------|--------|--------|-------------|---------|--------------|---------|-------------|--------------|--------|------------------------------------------|
| 3267 E07 | X | 592    | 600    | -0.15670757 | 710    | 720    | -0.2419529  | 3876127 | 0.96002571   | 3703009 | 0.08832255  | experimental | Tocris | 930 ZD 7114 hydrochloride                |
| 3267 E08 | X | 594    | 600    | -0.15077202 | 673    | 680    | -0.34012707 | 4456923 | 1.68426196   | 4241714 | 0.73693749  | experimental | Tocris | 1061 (-)-Quinpirole hydrochloride        |
| 3267 E09 | X | 635    | 640    | -0.02909337 | 631    | 640    | -0.45156803 | 3666647 | 0.69881005   | 3882345 | 0.30424779  | experimental | Tocris | 931 Haloperidol hydrochloride            |
| 3267 E10 | X | 515    | 520    | -0.38522662 | 713    | 720    | -0.23399283 | 4105345 | 1.2458541    | 4702361 | 1.29129097  | experimental | Tocris | 1063 CGS 21680 hydrochloride             |
| 3267 E11 | X | 831    | 840    | -0.38819379 | 831    | 840    | 0.07910318  | 3534475 | 0.53399529   | 3956071 | 0.59301583  | experimental | Tocris | 932 Imipenem dihydrobromide              |
| 3267 E12 | X | 474    | 480    | -0.50690467 | 673    | 680    | -0.34012707 | 3077170 | -0.03625116  | 4023046 | 0.47365548  | experimental | Tocris | 1064 Mefesrigide maleate                 |
| 3267 E13 | X | 751    | 760    | 0.31516819  | 669    | 680    | -0.3507405  | 2793721 | -0.38970407  | 3988031 | 0.43149651  | experimental | Tocris | 933 MM 77 dihydrochloride                |
| 3267 E14 | X | 592    | 600    | -0.15670757 | 831    | 840    | 0.07910318  | 3474720 | 0.45948249   | 4159116 | 0.63748733  | experimental | Tocris | 1065 PD 168077 maleate                   |
| 3267 E15 | X | 634    | 640    | -0.03206114 | 632    | 640    | -0.44891467 | 2379545 | -0.90616988  | 3619060 | -0.10275425 | experimental | Tocris | 934 Olanol                               |
| 3267 E16 | X | 553    | 560    | -0.27245068 | 793    | 800    | 0.19054413  | 3842745 | 0.9183993    | 4263291 | 0.76291676  | experimental | Tocris | 1066 IB-MECA                             |
| 3267 E17 | X | 834    | 840    | 0.56149328  | 871    | 800    | -0.02703106 | 2713116 | -0.494021624 | 3212422 | -0.50235706 | experimental | Tocris | 935 Maprotiline hydrochloride            |
| 3267 E18 | X | 674    | 680    | 0.08664974  | 672    | 680    | -0.34278043 | 4321884 | 1.51587213   | 4515813 | 1.06730904  | experimental | Tocris | 1067 Quaxeterone M                       |
| 3267 E19 | X | 273    | 280    | -1.10342686 | 431    | 440    | -0.98223923 | 1032891 | -2.58540947  | 1123947 | -3.01693571 | experimental | Tocris | 937 Pimozide                             |
| 3267 E20 | X | 594    | 600    | -0.15077202 | 832    | 840    | 0.08175653  | 3647301 | 0.67468613   | 3440289 | -0.22799922 | experimental | Tocris | 1070 Zolantidine dimaleate               |
| 3267 E21 | X | 1031   | 1040   | 1.14614437  | 870    | 880    | 0.18258406  | 3911291 | 1.00387423   | 3960688 | 0.39857482  | experimental | Tocris | 940 4-Aminopyridine                      |
| 3267 E22 | X | 788    | 800    | 0.42497576  | 867    | 880    | 0.17462399  | 4066970 | 1.19800155   | 4045301 | 0.50045109  | experimental | Tocris | 1072 AGN 192403 hydrochloride            |
| 3267 E23 | E | 1081   | 1520   | 1.29453298  | 1269   | 1840   | 1.24127311  | 71201   | -3.7846098   | 73888   | -4.28123428 | empty        |        |                                          |
| 3267 E24 | P | 147343 | 148080 | 435.366812  | 191084 | 192240 | 504.888046  | 3409061 | 0.37760757   | 3595638 | -0.04095495 | empty        |        |                                          |
| 3267 F01 | N | 515    | 520    | -0.38522662 | 875    | 880    | 0.19585084  | 2800377 | -0.38140423  | 3704920 | 0.09062344  | empty        |        |                                          |
| 3267 F02 | E | 194    | 200    | -1.33788085 | 154    | 160    | -1.71721885 | 75465   | -3.77929272  | 74486   | -4.28051427 | empty        |        |                                          |
| 3267 F03 | X | 1396   | 1400   | 2.22938118  | 955    | 960    | 0.40811932  | 3320128 | 0.26671062   | 3897401 | 0.32237561  | experimental | Tocris | 1228 Nocodazole                          |
| 3267 F04 | X | 391    | 400    | -0.75322975 | 510    | 520    | -0.77262411 | 3168071 | 0.07709983   | 3890474 | 0.31403532  | experimental | Tocris | 1393 SB 222000                           |
| 3267 F05 | X | 434    | 440    | -0.62561555 | 792    | 800    | -0.02437771 | 2180509 | -1.15436216  | 2774259 | -1.0299168  | experimental | Tocris | 1229 Actinomycin D                       |
| 3267 F06 | X | 392    | 400    | -0.75026198 | 792    | 800    | -0.02437771 | 3240666 | 0.16762375   | 4119853 | 0.59021365  | experimental | Tocris | 1394 (RS)-3,4-DCPG                       |
| 3267 F07 | X | 674    | 680    | 0.08664974  | 511    | 520    | -0.76997075 | 3426556 | 0.39942334   | 3793227 | 0.19694738  | experimental | Tocris | 1230 Methotrexate                        |
| 3267 F08 | X | 474    | 480    | -0.50690467 | 433    | 440    | -0.97692482 | 1237470 | 0.3880935    | 3054413 | 0.3054413   | experimental | Tocris | 1065 (S)-3,4-DCPG                        |
| 3267 F09 | X | 194    | 200    | -1.33788085 | 594    | 600    | -0.5497422  | 2489773 | -0.76871867  | 3125188 | -0.60738908 | experimental | Tocris | 1231 Brefeldin A                         |
| 3267 F10 | X | 274    | 280    | -1.10045908 | 393    | 400    | -1.08306676 | 1323758 | -2.22270652  | 1921659 | -2.05646955 | experimental | Tocris | 1396 Fenretinide                         |
| 3267 F11 | X | 436    | 440    | -0.61968001 | 594    | 600    | -0.5497422  | 3107255 | 0.00126399   | 3851639 | 0.26727696  | experimental | Tocris | 1232 Wortmannin                          |
| 3267 F12 | X | 432    | 440    | -0.6315511  | 590    | 600    | -0.56035562 | 2684902 | -0.5253983   | 3377765 | -0.30327976 | experimental | Tocris | 1397 PP 1                                |
| 3267 F13 | X | 1392   | 1400   | 2.21751009  | 1631   | 1640   | 2.20187899  | 2985046 | -0.15112719  | 3432440 | -0.23744962 | experimental | Tocris | 1233 Cyclochalasin D                     |
| 3267 F14 | X | 912    | 920    | 0.79297995  | 1191   | 1200   | 1.03165799  | 2933441 | -0.21547717  | 3554835 | -0.09008283 | experimental | Tocris | 1398 Kenpaullone                         |
| 3267 F15 | X | 193    | 200    | -1.34084862 | 392    | 400    | -1.08572012 | 1531154 | -1.96408955  | 2189758 | -1.73367133 | experimental | Tocris | 1234 AZ3187, free acid                   |
| 3267 F16 | X | 380    | 390    | -0.60091462 | 512    | 520    | -0.60974338 | 3846332 | 0.4610132    | 4814955 | 0.33686955  | experimental | Tocris | 1395 CGP 33681 hydrochloride             |
| 3267 F17 | X | 354    | 360    | -0.86303732 | 713    | 720    | -0.23399283 | 2513693 | -0.7388911   | 3121979 | -0.6112528  | experimental | Tocris | 1235 Cyclopiazonic Acid                  |
| 3267 F18 | X | 354    | 360    | -0.86303732 | 552    | 560    | -0.66118315 | 2034875 | -1.33956365  | 2985080 | -0.77680279 | experimental | Tocris | 1400 SCH 202676 hydrobromide             |
| 3267 F19 | X | 515    | 520    | -0.38522662 | 713    | 720    | -0.23399283 | 2423513 | -0.85134302  | 3075053 | -0.66775294 | experimental | Tocris | 1236 BHQ                                 |
| 3267 F20 | X | 513    | 520    | -0.39116156 | 792    | 800    | -0.02437771 | 3766085 | 0.82280644   | 4415005 | 0.9455844   | experimental | Tocris | 1401 NU 1025                             |
| 3267 F21 | X | 351    | 360    | -0.87194064 | 429    | 440    | -0.98754594 | 1021974 | -2.59902266  | 1041523 | -3.11617637 | experimental | Tocris | 2398 SNAP 5089                           |
| 3267 F22 | X | 790    | 800    | 0.4309113   | 1068   | 1080   | 0.70794855  | 3809686 | 0.87717565   | 4472414 | 1.01470634  | experimental | Tocris | 1402 SB 203580 hydrochloride             |
| 3267 F23 | E | 1280   | 1600   | 1.2382154   | 1396   | 1840   | 1.57824933  | 73652   | -3.78155346  | 74486   | -4.28051427 | empty        |        |                                          |
| 3267 F24 | E | 114168 | 115040 | 336.910973  | 188776 | 189880 | 498.7641    | 3607182 | 0.62465887   | 3628288 | -0.00171574 | empty        |        |                                          |
| 3267 G01 | N | 597    | 600    | -0.14186871 | 835    | 840    | 0.0897166   | 3549146 | 0.55228962   | 4025377 | 0.47646207  | empty        |        |                                          |
| 3267 G02 | E | 156    | 160    | -1.45065619 | 195    | 200    | -1.60843125 | 72639   | -3.78281666  | 72864   | -4.2824672  | empty        |        |                                          |
| 3267 G03 | X | 312    | 320    | -0.98768375 | 552    | 560    | -0.66118315 | 1291608 | -2.26279666  | 1899908 | -2.08265833 | experimental | Tocris | 2910 H 89 dihydrochloride                |
| 3267 G04 | X | 754    | 760    | 0.32407151  | 753    | 760    | -0.12785859 | 3226134 | 0.14950275   | 4500144 | 1.04809398  | experimental | Tocris | 1074 (RS)-AMPA hydrobromide              |
| 3267 G05 | X | 913    | 920    | 0.79594727  | 751    | 760    | -0.13316531 | 3525341 | 0.52260545   | 3767307 | 0.16573902  | experimental | Tocris | 946 WB 4101 hydrochloride                |
| 3267 G06 | X | 800    | 840    | 0.43981462  | 1031   | 1040   | 0.43981462  | 4027751 | 1.14809955   | 4613607 | 0.3064413   | experimental | Tocris | 1075 Nifedipine                          |
| 3267 G07 | X | 712    | 720    | -1.19942508 | 1072   | 1080   | 0.71856198  | 3915863 | 0.90957538   | 4400412 | 0.92801404  | experimental | Tocris | 947 Zanisarone                           |
| 3267 G08 | X | 594    | 600    | -0.15077202 | 633    | 640    | -0.44626132 | 3302270 | 0.2444422    | 3547107 | -0.09938755 | experimental | Tocris | 1076 Ouabain                             |
| 3267 G09 | X | 552    | 560    | -0.27541845 | 471    | 480    | -0.87610499 | 3426350 | 0.39916646   | 3719647 | 0.10835514  | experimental | Tocris | 948 BRL 37344, sodium salt               |
| 3267 G10 | X | 756    | 760    | 0.33000705  | 595    | 600    | -0.54708884 | 3741382 | 0.79200249   | 4285677 | 0.78987009  | experimental | Tocris | 1077 Lobeline hydrochloride              |
| 3267 G11 | X | 154    | 160    | -1.45659173 | 233    | 240    | -1.50760372 | 910882  | -2.73755126  | 1021027 | -3.14085409 | experimental | Tocris | 949 CP 55,940                            |
| 3267 G12 | X | 476    | 480    | -0.50096913 | 694    | 600    | -0.5497422  | 3736347 | 0.78572399   | 4288308 | 0.79303789  | experimental | Tocris | 1079 (+)-SK&F 10047 hydrochloride        |
| 3267 G13 | X | 512    | 520    | -0.39412933 | 569    | 680    | -0.3507405  | 3673476 | 0.70732562   | 4058113 | 0.51587707  | experimental | Tocris | 950 Xamoterol hemifumarate               |
| 3267 G14 | X | 473    | 480    | -0.50987244 | 551    | 560    | -0.66383651 | 3003486 | -0.12813303  | 3804510 | 0.21053241  | experimental | Tocris | 1080 (R)-(+)-8-Hydroxy-DPAT hydrobromide |
| 3267 G15 | X | 635    | 640    | -0.02909337 | 593    | 600    | -0.55239556 | 3172599 | 0.08274612   | 4211681 | 0.70077697  | experimental | Tocris | 952 Sotalol hydrochloride                |
| 3267 G16 | X | 474    | 480    | -0.50690467 | 793    | 800    | -0.02172435 | 3839198 | 0.91397629   | 4390827 | 0.91647345  | experimental | Tocris | 1081 SKF 89976A hydrochloride            |
| 3267 G17 | X | 554    | 560    | -0.2694829  | 631    | 640    | -0.45156803 | 3671732 | 0.7051509    | 4081841 | 0.54444621  | experimental | Tocris | 955 (-)-MK 801 maleate                   |
| 3267 G18 | X | 675    | 680    | 0.08961752  | 792    | 800    | -0.02437771 | 3516675 | 0.51179919   | 4050355 | 0.50653624  | experimental | Tocris | 1082 CFM-2                               |
| 3267 G19 | X | 473    | 480    | -0.50987244 | 751    | 760    | -0.13316531 | 3312726 | 0.25748054   | 3798888 | 0.20376338  | experimental | Tocris | 956 BD 1047 dihydrobromide               |
| 3267 G20 | X | 793    | 800    | 0.43981462  | 831    | 840    | 0.07910318  | 3436633 | 1.54673343   | 4109011 | 0.57715956  | experimental | Tocris | 1088 CGP 54626 hydrochloride             |
| 3267 G21 | X | 792    | 800    | 0.43684685  | 1031   | 920    | 0.29137166  | 3874479 | 0.9579707    | 3792027 | 0.19550255  | experimental | Tocris | 959 Spemidine trihydrochloride           |
| 3267 G22 | X | 948    | 960    | 0.89981929  | 986    | 1000   | 0.49037336  | 3974506 | 1.08270155   | 4258465 | 0.75710613  | experimental | Tocris | 1089 8-Bromo-cGMP, sodium salt           |
| 3267 G23 | E | 1190   | 1640   | 1.61802013  | 1323   | 1880   | 1.38455434  | 70853   | -3.78504375  | 75048   | -4.27983761 | empty        |        |                                          |
| 3267 G24 | P | 151163 | 151920 | 446.703701  | 186019 | 187200 | 491.448797  | 3498169 | 0.48872273   | 3698889 | 0.08336196  | empty        |        |                                          |
| 3267 H01 | N | 476    | 480    | -0.50096913 | 635    | 640    | -0.4409546  | 2938165 | -0.20958648  | 3594841 | -0.04191456 | empty        |        |                                          |
| 3267 H02 | E | 276    | 280    | -1.09452354 | 155    | 160    | -1.71456549 | 74506   | -3.78048856  | 72382   | -4.28304754 | empty        |        |                                          |
| 3267 H03 | X | 555    | 560    | -0.26651513 | 714    | 720    | -0.23133948 | 3493453 | 0.48284201   | 3818929 | 0.22789327  | experimental | Tocris | 1238 CCMQ                                |
| 3267 H04 | X | 473    | 480    | -0.50987244 | 633    | 640    | -0.34278043 | 3461769 | 0.44332296   | 4463325 | 0.04776513  | experimental | Tocris | 1403 FPL 64176                           |
| 3267 H05 | X | 394    | 400    | -0.74326444 | 432    | 440    | -0.97985897 | 1293790 | -2.26507577  | 1640280 | -2.39570404 | experimental | Tocris | 242 SB 216641 hydrochloride              |
| 3267 H06 | X | 353    | 360    | -0.86600509 | 551    | 560    | -0.66383651 | 3088966 | -0.02154188  | 3944713 | 0.3793405   | experimental | Tocris | 1405 (-)-Terreic acid                    |
| 3267 H07 | X | 635    | 640    | -0.02909337 | 552    | 560    | -0.66118315 | 3526381 | 0.5239023    | 4493628 | 1.04024855  | experimental | Tocris | 1243 (+)-PD 128907 hydrochloride         |
| 3267 H08 | X | 231    | 240    | -1.22807328 | 391    | 400    | -1.08837347 | 2583297 | -0.65209687  | 3489171 | -0.16914401 | experimental | Tocris | 1407 PP 2                                |
| 3267 H09 | X | 1033   | 1040   | 1.15207992  | 1353   | 1360   | 1.46415502  | 2470214 | -0.79310819  | 3321259 | -0.37131446 | experimental | Tocris | 1                                        |

|          |   |        |        |             |        |        |             |          |             |         |             |              |        |
|----------|---|--------|--------|-------------|--------|--------|-------------|----------|-------------|---------|-------------|--------------|--------|
| 3267 I01 | N | 597    | 600    | -0.14186871 | 795    | 800    | -0.01641764 | 3508289  | 0.50134209  | 4019636 | 0.46954976  | empty        |        |
| 3267 I02 | E | 155    | 160    | -1.45362396 | 274    | 280    | -1.39881613 | 71992    | -3.78362345 | 73795   | -4.28134625 | empty        |        |
| 3267 I03 | X | 475    | 480    | -0.50393699 | 713    | 720    | -0.23399283 | 2731337  | -0.46749516 | 3926884 | 0.35787392  | experimental | Tocris |
| 3267 I04 | X | 503    | 560    | -0.27245688 | 749    | 760    | -0.13847202 | 3173729  | 0.08415519  | 4293132 | 0.87631184  | experimental | Tocris |
| 3267 I05 | X | 433    | 440    | -0.62858333 | 671    | 680    | -0.34543379 | 7044161  | -0.00261908 | 4018222 | 0.46784726  | experimental | Tocris |
| 3267 I06 | X | 632    | 640    | -0.03799668 | 910    | 920    | 0.2887183   | 4587539  | 1.84713643  | 4347663 | 0.86450286  | experimental | Tocris |
| 3267 I07 | X | 551    | 560    | -0.27838622 | 709    | 720    | -0.24460626 | 4079014  | 1.21302008  | 4176779 | 0.65875405  | experimental | Tocris |
| 3267 I08 | X | 714    | 720    | 0.20536063  | 672    | 680    | -0.34278043 | 4170510  | 1.32711302  | 4339839 | 0.85508256  | experimental | Tocris |
| 3267 I09 | X | 1032   | 1040   | 1.14911215  | 791    | 800    | -0.02703106 | 3762110  | 0.81784972  | 4137136 | 0.61102284  | experimental | Tocris |
| 3267 I10 | X | 512    | 520    | -0.39412933 | 552    | 560    | -0.66118315 | 3773186  | 0.83166118  | 4598721 | 1.16678328  | experimental | Tocris |
| 3267 I11 | X | 474    | 480    | -0.50690467 | 592    | 600    | -0.55504891 | 3525061  | 0.5222563   | 3983428 | 0.42599437  | experimental | Tocris |
| 3267 I12 | X | 755    | 760    | 0.32703928  | 833    | 840    | 0.08440989  | 2290814  | -0.89211775 | 2832215 | -0.95230045 | experimental | Tocris |
| 3267 I13 | X | 554    | 560    | -0.2694829  | 792    | 800    | -0.02437771 | 2888509  | -0.27150611 | 4016138 | 0.46533807  | experimental | Tocris |
| 3267 I14 | X | 595    | 600    | -0.14780425 | 834    | 840    | 0.08706324  | 3170088  | 0.07961497  | 4164036 | 0.64341114  | experimental | Tocris |
| 3267 I15 | X | 634    | 640    | -0.03206114 | 512    | 520    | -0.76731739 | 3302637  | 0.24489984  | 3989632 | 0.43342415  | experimental | Tocris |
| 3267 I16 | X | 511    | 520    | -0.3970971  | 792    | 800    | -0.02437771 | 3474674  | 0.45942513  | 4127991 | 0.60001202  | experimental | Tocris |
| 3267 I17 | X | 1307   | 1320   | 1.96524947  | 986    | 1000   | 0.49037336  | 2257674  | -1.05813958 | 2590549 | -1.25110846 | experimental | Tocris |
| 3267 I18 | X | 3192   | 3200   | 7.59499882  | 2351   | 2360   | 4.11220432  | 8384855  | 6.58228249  | 8354469 | 5.68880233  | experimental | Tocris |
| 3267 I19 | X | 184    | 200    | -1.36755857 | 303    | 320    | -1.3218688  | 1066103  | -2.61881335 | 1082414 | -3.06694253 | experimental | Tocris |
| 3267 I20 | X | 913    | 920    | 0.79594727  | 1191   | 1200   | 1.03431134  | 2582997  | -0.65247097 | 2880323 | -0.90221296 | experimental | Tocris |
| 3267 I21 | X | 1151   | 1160   | 1.50227702  | 1147   | 1160   | 0.91756368  | 3853935  | 0.93252921  | 3987305 | 0.43062238  | experimental | Tocris |
| 3267 I22 | X | 627    | 640    | -0.05283554 | 1225   | 1240   | 1.12452545  | 3976675  | 1.08540623  | 3992038 | 0.43632104  | experimental | Tocris |
| 3267 I23 | E | 1386   | 1920   | 2.19970346  | 1260   | 1840   | 1.21739291  | 73037    | -3.78232036 | 72998   | -4.28230586 | empty        |        |
| 3267 I24 | P | 179709 | 180640 | 531.421723  | 193619 | 194880 | 511.614303  | 3428721  | 0.40212303  | 3496554 | -0.16025469 | empty        |        |
| 3267 J01 | N | 476    | 480    | -0.50096913 | 715    | 720    | -0.22868612 | 2719139  | -0.48270703 | 3648017 | -0.19461398 | empty        |        |
| 3267 J02 | E | 200    | 200    | -1.33194341 | 275    | 280    | -1.39616277 | 73736    | -3.7814487  | 7480    | -4.28012778 | empty        |        |
| 3267 J03 | X | 514    | 520    | -0.38819379 | 511    | 520    | -0.7699575  | 3275055  | -0.21050586 | 4111179 | 0.75736993  | experimental | Tocris |
| 3267 J04 | X | 1032   | 1040   | 1.14911215  | 792    | 800    | -0.02437771 | 3306960  | 0.2502905   | 4231776 | 0.72497188  | experimental | Tocris |
| 3267 J05 | X | 831    | 840    | 0.55258996  | 827    | 840    | 0.06848975  | 2418963  | -0.85701674 | 3114382 | -0.62039979 | experimental | Tocris |
| 3267 J06 | X | 1311   | 1320   | 1.97712055  | 1508   | 1520   | 1.8754252   | 3032740  | -0.09165412 | 3677717 | 0.05787032  | experimental | Tocris |
| 3267 J07 | X | 1192   | 1200   | 1.62395568  | 1589   | 1600   | 2.09034704  | 2709602  | -0.4945981  | 3413652 | -0.26007087 | experimental | Tocris |
| 3267 J08 | X | 351    | 360    | -0.87194064 | 789    | 800    | -0.03233778 | 3069816  | -0.04542139 | 3704324 | 0.08990584  | experimental | Tocris |
| 3267 J09 | X | 392    | 400    | -0.75026198 | 632    | 640    | -0.44891467 | 3852199  | 0.93018817  | 4496352 | 1.04352832  | experimental | Tocris |
| 3267 J10 | X | 665    | 680    | -0.08961752 | 806    | 820    | 0.09017430  | 2454882  | 0.08961752  | 3632888 | 0.08961752  | experimental | Tocris |
| 3267 J11 | X | 395    | 400    | -0.74135866 | 714    | 720    | -0.23133948 | 3626302  | 0.64850097  | 4458300 | 0.99771271  | experimental | Tocris |
| 3267 J12 | X | 354    | 360    | -0.86303732 | 512    | 520    | -0.76731739 | 3284474  | 0.22225109  | 3668585 | 0.04687515  | experimental | Tocris |
| 3267 J13 | X | 196    | 200    | -1.33194531 | 273    | 280    | -1.40146948 | 1161278  | -2.4253145  | 1263156 | -2.84932443 | experimental | Tocris |
| 3267 J14 | X | 153    | 160    | -1.45955951 | 271    | 280    | -1.40677619 | 1801129  | -1.62743833 | 2060882 | -1.88884141 | experimental | Tocris |
| 3267 J15 | X | 474    | 480    | -0.50690467 | 635    | 640    | -0.4409546  | 3501480  | 0.49285146  | 4243005 | 0.73849189  | experimental | Tocris |
| 3267 J16 | X | 594    | 600    | -0.15077202 | 791    | 800    | -0.55770227 | 2849087  | -0.32066423 | 3622476 | -0.08086413 | experimental | Tocris |
| 3267 J17 | X | 440    | 450    | -0.53748654 | 606    | 620    | -0.60977430 | 3371915  | 0.33128755  | 3371915 | 0.08006067  | experimental | Tocris |
| 3267 J18 | X | 665    | 680    | 0.0599398   | 584    | 600    | -0.04560456 | 3045742  | -0.07544099 | 3853689 | 0.02893997  | experimental | Tocris |
| 3267 J19 | X | 754    | 760    | 0.32407151  | 1431   | 1440   | 1.67111679  | 3582033  | 0.59329878  | 4594073 | 1.16118696  | experimental | Tocris |
| 3267 J20 | X | 550    | 560    | -0.28135399 | 1106   | 1120   | 0.80877608  | 3443212  | 0.4201929   | 3996230 | 0.44136832  | experimental | Tocris |
| 3267 J21 | X | 1072   | 1080   | 1.26782303  | 1347   | 1360   | 1.44823488  | 3389490  | 0.35230308  | 4028231 | 0.47989886  | experimental | Tocris |
| 3267 J22 | P | 588    | 600    | -0.16857865 | 1303   | 1320   | 1.33148722  | 3240739  | 0.16771478  | 3709491 | 0.09612704  | experimental | Tocris |
| 3267 J23 | E | 1202   | 1720   | 1.6536334   | 1475   | 2172   | 1.78786445  | 73643    | -3.7815647  | 74581   | -4.28039989 | empty        |        |
| 3267 J24 | P | 173980 | 174920 | 514.383743  | 216630 | 217200 | 572.570678  | 38617306 | 0.94207306  | 4192465 | 0.6776404   | empty        |        |
| 3267 K01 | N | 595    | 600    | -0.26354736 | 595    | 600    | -0.54130889 | 3170438  | 0.0883514   | 3993365 | 0.43791978  | experimental | Tocris |
| 3267 K02 | E | 236    | 240    | -1.21323442 | 275    | 280    | -1.39616277 | 74536    | -3.78045115 | 71621   | -4.2839638  | empty        |        |
| 3267 K03 | X | 354    | 360    | -0.86303732 | 594    | 600    | -0.5497422  | 2891938  | -0.26723024 | 3823472 | 0.23363616  | experimental | Tocris |
| 3267 K04 | X | 834    | 840    | 0.56149328  | 510    | 520    | -0.77262411 | 2341650  | -0.95342387 | 3083092 | -0.65807377 | experimental | Tocris |
| 3267 K05 | X | 432    | 440    | -0.6315511  | 753    | 760    | -0.12785859 | 3302512  | 0.24474397  | 3812255 | 0.2198576   | experimental | Tocris |
| 3267 K06 | X | 552    | 560    | -0.27541845 | 629    | 640    | -0.45687474 | 2997389  | -0.13573582 | 3152098 | -0.57498874 | experimental | Tocris |
| 3267 K07 | X | 632    | 640    | -0.03799668 | 749    | 760    | -0.13847202 | 3433100  | 0.40759352  | 3578031 | -0.06215424 | experimental | Tocris |
| 3267 K08 | X | 674    | 680    | 0.08664974  | 952    | 960    | 0.40015925  | 4364451  | 1.56895198  | 4165626 | 0.64532554  | experimental | Tocris |
| 3267 K09 | X | 634    | 640    | -0.03206114 | 431    | 440    | -0.98223923 | 3477525  | 0.46298025  | 3695820 | 0.07966668  | experimental | Tocris |
| 3267 K10 | X | 554    | 560    | -0.2694829  | 634    | 640    | -0.44360796 | 3709068  | 0.75170784  | 4675380 | 1.25908272  | experimental | Tocris |
| 3267 K11 | X | 314    | 320    | -0.9817482  | 312    | 320    | -1.2979886  | 1066454  | -2.54355736 | 1285792 | -2.82207009 | experimental | Tocris |
| 3267 K12 | X | 636    | 640    | -0.02612559 | 914    | 920    | 0.29933173  | 3237421  | 0.16357732  | 4192789 | 0.67803051  | experimental | Tocris |
| 3267 K13 | X | 393    | 400    | -0.74729421 | 669    | 680    | -0.3507405  | 3117537  | 0.01408535  | 4466461 | 1.00753877  | experimental | Tocris |
| 3267 K14 | X | 1115   | 1120   | 1.39543723  | 1434   | 1440   | 1.67907685  | 3028931  | -0.09640383 | 3833080 | 0.24493144  | experimental | Tocris |
| 3267 K15 | X | 552    | 560    | -0.27541845 | 606    | 620    | -0.98489259 | 3144853  | 0.04814764  | 4298074 | 0.80479641  | experimental | Tocris |
| 3267 K16 | X | 511    | 520    | -0.3970971  | 678    | 680    | -0.77793082 | 3505771  | 0.49820221  | 4156299 | 0.63409559  | experimental | Tocris |
| 3267 K17 | X | 752    | 760    | 0.31813597  | 501    | 520    | -0.34543379 | 3542625  | 0.54415811  | 4106923 | 0.57464559  | experimental | Tocris |
| 3267 K18 | X | 872    | 880    | 0.67426861  | 711    | 720    | -0.23929955 | 4164582  | 1.31972097  | 4473080 | 1.01550822  | experimental | Tocris |
| 3267 K19 | X | 752    | 760    | 0.31813597  | 989    | 1000   | 0.49833343  | 2518468  | -0.73293681 | 2689026 | -1.13253957 | experimental | Tocris |
| 3267 K20 | X | 593    | 600    | -0.15373979 | 749    | 760    | -0.13847202 | 4078236  | 1.21204994  | 3661723 | 0.03861312  | experimental | Tocris |
| 3267 K21 | X | 548    | 560    | -0.2828954  | 706    | 720    | -0.25266633 | 2950070  | -0.19474128 | 3088815 | -0.65154434 | experimental | Tocris |
| 3267 K22 | X | 750    | 760    | 0.31228042  | 1065   | 1080   | 0.69999898  | 3114833  | 0.01071354  | 2941969 | -0.82798956 | experimental | Tocris |
| 3267 K23 | E | 1084   | 1520   | 1.30343629  | 1465   | 2000   | 1.76133089  | 72667    | -3.78278174 | 72171   | -4.28330159 | empty        |        |
| 3267 K24 | P | 145620 | 146600 | 430.253341  | 178068 | 179400 | 470.351964  | 3094923  | -0.01411367 | 3428533 | -0.24215375 | empty        |        |
| 3267 L01 | N | 515    | 520    | -0.38522602 | 555    | 560    | -0.65322308 | 2684547  | -0.52584098 | 3562753 | -0.08054935 | empty        |        |
| 3267 L02 | E | 275    | 280    | -1.09749131 | 235    | 240    | -1.50229701 | 74489    | -3.78050976 | 70261   | -4.28560128 | empty        |        |
| 3267 L03 | X | 636    | 640    | -0.02612559 | 874    | 880    | 0.19319749  | 3169874  | 0.07934812  | 3994870 | 0.43973084  | experimental | Tocris |
| 3267 L04 | X | 392    | 400    | -0.75026198 | 571    | 560    | -0.66383651 | 3432546  | 0.4068927   | 3965668 | 0.40457087  | experimental | Tocris |
| 3267 L05 | X | 475    | 480    | -0.50393699 | 553    | 560    | 0.6585298   | 2914079  | -0.2396104  | 3606664 | -0.02767936 | experimental | Tocris |
| 3267 L06 | X | 632    | 640    | -0.03799668 | 633    | 640    | -0.08600509 | 3626132  | 0.0974903   | 3626132 | 0.0974903   | experimental | Tocris |
| 3267 L07 | X | 476    | 480    | -0.50096913 | 674    | 680    | -0.33747372 | 3235211  | 0.16082157  | 3951517 | 0.38753269  | experimental | Tocris |
| 3267 L08 | X | 355    | 360    | -0.86006955 | 592    | 600    | -0.55504891 | 2754887  | -0.43812898 | 3648218 | 0.02235275  | experimental | Tocris |
| 3267 L09 | X | 474    | 480    | -0.50690467 | 714    | 720    | -0.23133948 | 3434737  | 0.40962482  | 3979339 | 0.42103111  | experimental | Tocris |
| 3267 L10 | X | 435    | 440    | -0.62264778 | 514    | 520    | -0.76201068 | 3016490  | -0.1191741  | 3728241 | 0           |              |        |

|          |   |        |        |             |        |        |              |          |             |         |             |              |        |                                        |
|----------|---|--------|--------|-------------|--------|--------|--------------|----------|-------------|---------|-------------|--------------|--------|----------------------------------------|
| 3267 L19 | X | 513    | 520    | -0.39116156 | 751    | 760    | -0.13316531  | 3447065  | 0.42499748  | 4188915 | 0.67336611  | experimental | Tocris | 1302 (S)-3,4-DCPG                      |
| 3267 L20 | X | 629    | 640    | -0.0469     | 828    | 840    | 0.07114311   | 3286016  | 0.22417392  | 4155721 | 0.63339966  | experimental | Tocris | 1461 Linomide                          |
| 3267 L21 | X | 1592   | 1600   | 2.51106451  | 1750   | 1760   | 2.51753736   | 3088681  | -0.02189727 | 3623191 | -0.00778042 | experimental | Tocris | 1304 BWB 70C                           |
| 3267 L22 | X | 626    | 640    | -0.05580332 | 1023   | 1040   | 0.585854753  | 1129769  | -2.46460533 | 1797183 | -2.2063419  | experimental | Tocris | 1467 Daunorubicin hydrochloride        |
| 3267 L23 | E | 1029   | 1026   | -1.6988655  | 1449   | 2160   | 1.71887772   | 72123    | 3.7834601   | 71692   | 7.28387832  | empty        |        |                                        |
| 3267 L24 | P | 161314 | 162200 | 476.829556  | 239279 | 240400 | 632.766539   | 3459458  | 0.44045121  | 3735498 | 0.12744015  | empty        |        |                                        |
| 3267 M01 | N | 716    | 720    | 0.21129617  | 715    | 720    | -0.22868612  | 3446551  | 0.42435654  | 4211124 | 0.70010633  | empty        |        |                                        |
| 3267 M02 | E | 195    | 200    | -1.33491308 | 155    | 160    | -1.71456549  | 72992    | -3.78237648 | 73126   | -4.28215174 | empty        |        |                                        |
| 3267 M03 | X | 434    | 440    | -0.62561555 | 673    | 680    | -0.34012707  | 2276539  | -1.03461546 | 3455617 | -0.20954391 | experimental | Tocris | 997 Mianserin hydrochloride            |
| 3267 M04 | X | 755    | 760    | 0.32703928  | 1033   | 1040   | 0.61508109   | 2002542  | -1.37628199 | 2840344 | -0.95034873 | experimental | Tocris | 1120 AM 630                            |
| 3267 M05 | X | 431    | 440    | -0.63451887 | 511    | 520    | -0.76997075  | 2757734  | -0.43457885 | 3055080 | -0.69180095 | experimental | Tocris | 998 AH 11110 hydrochloride             |
| 3267 M06 | X | 956    | 960    | 0.92356147  | 636    | 640    | -0.44360796  | 4372534  | 1.57903125  | 4187053 | 0.67166482  | experimental | Tocris | 1122 Telenzepine dihydrochloride       |
| 3267 M07 | X | 154    | 160    | -1.45659173 | 154    | 160    | -1.71721885  | 870652   | -2.78771693 | 810972  | -3.39376582 | experimental | Tocris | 999 Tamoxifen citrate                  |
| 3267 M08 | X | 155    | 160    | -1.45362396 | 275    | 280    | -1.39616277  | 1399436  | -2.12833818 | 1391160 | -2.69520426 | experimental | Tocris | 1123 (S)-(+)-Niguldipine hydrochloride |
| 3267 M09 | X | 676    | 680    | 0.09258529  | 434    | 440    | -0.97427916  | 3140036  | 0.04214097  | 3454943 | -0.21035542 | experimental | Tocris | 1000 ZD 7288                           |
| 3267 M10 | X | 292    | 240    | -1.33788085 | 234    | 240    | -1.50495037  | 1227296  | -2.34299191 | 1324877 | -2.77501072 | experimental | Tocris | 1124 (R)-(-)-Niguldipine hydrochloride |
| 3267 M11 | X | 593    | 600    | -0.15373979 | 551    | 560    | -0.66383651  | 2810980  | -0.66818259 | 3423328 | -0.24842071 | experimental | Tocris | 1001 Chlorisondamine diiodide          |
| 3267 M12 | X | 995    | 1000   | 1.03930458  | 1794   | 1800   | 2.63428502   | 3187478  | 0.10129981  | 4200570 | 0.68739903  | experimental | Tocris | 1125 Quercetin                         |
| 3267 M13 | X | 392    | 400    | -0.75026198 | 586    | 600    | -0.57096905  | 2647085  | -0.57255503 | 3107253 | -0.62898329 | experimental | Tocris | 1002 L-745,870 thiydrochloride         |
| 3267 M14 | X | 754    | 760    | 0.32407151  | 1153   | 1160   | 0.93348381   | 3641050  | 0.66689131  | 4467852 | 1.00921357  | experimental | Tocris | 1126 Dexamethasone                     |
| 3267 M15 | X | 513    | 520    | -0.39116156 | 388    | 400    | -1.09633354  | 2030793  | -1.34105379 | 2445761 | -1.425437   | experimental | Tocris | 1003 L-741,626                         |
| 3267 M16 | X | 512    | 520    | -0.39412933 | 828    | 840    | 0.07114311   | 3506219  | 0.49876086  | 4157578 | 0.63563554  | experimental | Tocris | 1127 Yohimbine hydrochloride           |
| 3267 M17 | X | 673    | 680    | 0.08368197  | 670    | 680    | -0.34808714  | 2599552  | -0.63182735 | 3047021 | -0.7015042  | experimental | Tocris | 1004 L-741,742 hydrochloride           |
| 3267 M18 | X | 553    | 560    | -0.27245068 | 1072   | 1080   | 0.71856198   | 3833132  | 0.90641216  | 4441998 | 0.97808076  | experimental | Tocris | 1129 BRL 54443                         |
| 3267 M19 | X | 512    | 520    | -0.39412933 | 631    | 640    | -0.45156803  | 3602023  | 0.61822574  | 3909392 | 0.36681309  | experimental | Tocris | 1006 BWB 7378 dihydrochloride          |
| 3267 M20 | X | 910    | 920    | 0.79594727  | 712    | 720    | -0.404664619 | 11760315 | 1.17603115  | 4187051 | 0.5774442   | experimental | Tocris | 1130 LY 294002 hydrochloride           |
| 3267 M21 | X | 908    | 920    | 0.81110841  | 708    | 720    | -0.24775961  | 2318681  | 0.98205557  | 2268224 | -3.81919621 | experimental | Tocris | 1007 N-Desmethyloclozapine             |
| 3267 M22 | X | 909    | 920    | 0.78407618  | 986    | 1000   | 0.49037336   | 4571556  | 1.82720608  | 4308382 | 0.81720751  | experimental | Tocris | 1131 KU14R                             |
| 3267 M23 | E | 1331   | 1800   | 2.036476    | 1470   | 2080   | 1.77459767   | 73053    | -3.78230041 | 72226   | -4.28323537 | empty        |        |                                        |
| 3267 M24 | P | 156840 | 157800 | 463.551743  | 204321 | 205680 | 540.010519   | 3048200  | -0.07237593 | 3392576 | -0.28544692 | empty        |        |                                        |
| 3267 N01 | N | 516    | 520    | -0.38225824 | 915    | 920    | 0.30198508   | 2355016  | -0.93675685 | 2904557 | -0.87303459 | empty        |        |                                        |
| 3267 N02 | E | 156    | 160    | -1.45065619 | 195    | 200    | -1.60843125  | 69425    | -3.78682443 | 70875   | -4.28486201 | empty        |        |                                        |
| 3267 N03 | X | 555    | 560    | -0.26651513 | 471    | 480    | -0.87610499  | 3454731  | 0.43455677  | 4097748 | 0.56359865  | experimental | Tocris | 1305 Monastrol                         |
| 3267 N04 | X | 385    | 400    | -0.87194064 | 593    | 600    | -0.45422158  | 3183433  | 1.58431218  | 3197497 | 0.6289114   | experimental | Tocris | 1470 Flecainide acetate                |
| 3267 N05 | X | 1035   | 1040   | 1.15801546  | 992    | 1000   | 0.50894685   | 2476485  | -0.78528843 | 2793247 | -1.00705475 | experimental | Tocris | 1307 Ciglitazone                       |
| 3267 N06 | X | 430    | 440    | -0.63748664 | 592    | 600    | -0.55504891  | 2748684  | -0.44586394 | 3156968 | -0.56912513 | experimental | Tocris | 1471 Etomidate                         |
| 3267 N07 | X | 395    | 400    | -0.74135866 | 515    | 520    | -0.75935733  | 2826110  | -0.3493159  | 3492512 | -0.16512136 | experimental | Tocris | 1309 PNDOS                             |
| 3267 N08 | X | 394    | 400    | -0.74432644 | 553    | 560    | -0.6585298   | 2454630  | -0.812541   | 3216295 | -0.49769387 | experimental | Tocris | 1472 Suramin hexasodium salt           |
| 3267 N09 | X | 473    | 480    | -0.50987244 | 994    | 1000   | 0.51160021   | 3486520  | 0.47419676  | 4241535 | 0.73672197  | experimental | Tocris | 1310 UCL 1684                          |
| 3267 N10 | X | 393    | 400    | -0.74729421 | 633    | 640    | -0.44626132  | 2640875  | -0.58029873 | 3410481 | -0.26388883 | experimental | Tocris | 1475 (-)-[R,4S]-Chromanol 293B         |
| 3267 N11 | X | 664    | 670    | 0.32061114  | 610    | 620    | -0.32061114  | 3402268  | 0.36136881  | 4173107 | 0.89190321  | experimental | Tocris | 1312 WY 14643                          |
| 3267 N12 | X | 312    | 320    | -0.98765975 | 310    | 320    | -1.30329531  | 766830   | -2.9178004  | 967650  | -3.2051214  | experimental | Tocris | 1477 GR 127935 hydrochloride           |
| 3267 N13 | X | 595    | 600    | -0.14780425 | 554    | 560    | -0.65587644  | 3657611  | 0.68754241  | 4214765 | 0.70449019  | experimental | Tocris | 1317 CP 94253 hydrochloride            |
| 3267 N14 | X | 392    | 400    | -0.75026198 | 590    | 600    | -0.56035562  | 2222349  | -1.10218886 | 3036519 | -0.71414889 | experimental | Tocris | 1479 Mefipristone                      |
| 3267 N15 | X | 753    | 760    | 0.32110374  | 1151   | 1160   | 0.9281771    | 3017255  | -0.11096347 | 3971716 | 0.41185282  | experimental | Tocris | 1321 XM 336372                         |
| 3267 N16 | X | 312    | 320    | -0.98768375 | 510    | 520    | -0.77262411  | 1103506  | -2.49735456 | 1356649 | -2.7367564  | experimental | Tocris | 1480 FIT                               |
| 3267 N17 | X | 513    | 520    | -0.39116156 | 712    | 720    | -0.23399283  | 3382551  | 0.34455034  | 3905771 | 0.33245331  | experimental | Tocris | 1322 GR 113808                         |
| 3267 N18 | X | 548    | 560    | -0.28748954 | 546    | 560    | -0.67710329  | 2578979  | -0.6574813  | 3622208 | -0.66653821 | experimental | Tocris | 1483 GR 89656 fumarate                 |
| 3267 N19 | X | 593    | 600    | -0.15373979 | 550    | 560    | -0.66468986  | 3148803  | 0.3835207   | 4274775 | 0.71767438  | experimental | Tocris | 1323 Butabindole oxalate               |
| 3267 N20 | X | 391    | 400    | -0.75322975 | 711    | 720    | -0.23929955  | 2006850  | -1.37091004 | 2884346 | -0.89736917 | experimental | Tocris | 1484 Olethethanolamide                 |
| 3267 N21 | X | 592    | 600    | -0.15670757 | 710    | 720    | -0.2419529   | 3430022  | 0.40374534  | 4270571 | 0.77168207  | experimental | Tocris | 1324 RX 821002 hydrochloride           |
| 3267 N22 | X | 549    | 560    | -0.28432176 | 947    | 960    | 0.38689247   | 2706813  | -0.4980759  | 3184421 | -0.536071   | experimental | Tocris | 1493 CGP 78608                         |
| 3267 N23 | E | 1424   | 1920   | 2.3124788   | 1328   | 2000   | 1.39782112   | 68138    | -3.78842928 | 70798   | -4.28495472 | empty        |        |                                        |
| 3267 N24 | P | 166638 | 167520 | 492.629974  | 225763 | 227000 | 596.903779   | 3522595  | 0.51918127  | 3882661 | 0.30462826  | empty        |        |                                        |
| 3267 O01 | N | 636    | 640    | -0.02612559 | 755    | 760    | -0.12255188  | 3311167  | 0.25553651  | 3450898 | -0.21522571 | empty        |        |                                        |
| 3267 O02 | E | 235    | 240    | -1.2162022  | 193    | 200    | -1.61373796  | 71318    | -3.78446391 | 69316   | -4.28673908 | empty        |        |                                        |
| 3267 O03 | X | 754    | 760    | 0.32407151  | 1434   | 1440   | 1.67907685   | 2945109  | -0.2009275  | 3728119 | 0.11855565  | experimental | Tocris | 1014 QX 314 bromide                    |
| 3267 O04 | X | 913    | 920    | 0.79594727  | 991    | 1000   | 0.50364014   | 2931468  | -0.21793745 | 4032731 | 0.48531648  | experimental | Tocris | 1132 RS 16566 hydrochloride            |
| 3267 O05 | X | 589    | 600    | -0.16561088 | 630    | 640    | -0.45422138  | 2991027  | -0.14366905 | 3016512 | -0.73823784 | experimental | Tocris | 1015 RS 16566 hydrochloride            |
| 3267 O06 | X | 1067   | 1080   | 1.25298417  | 587    | 600    | -0.56831569  | 3870973  | 0.95359882  | 3918345 | 0.34759274  | experimental | Tocris | 1133 BRL 44408 maleate                 |
| 3267 O07 | X | 791    | 800    | 0.43387908  | 553    | 560    | -0.6585298   | 2883785  | -0.2773968  | 2908412 | -0.86839307 | experimental | Tocris | 1018 LY 225910                         |
| 3267 O08 | X | 1153   | 1160   | 1.50821257  | 754    | 760    | -0.12520524  | 3769354  | 0.82688279  | 3925092 | 0.3557163   | experimental | Tocris | 1134 CGP 12177 hydrochloride           |
| 3267 O09 | X | 871    | 880    | 0.67130084  | 514    | 520    | -0.76997075  | 3651810  | 0.68030873  | 3737470 | 0.12981449  | experimental | Tocris | 1024 CGP 20712 dihydrochloride         |
| 3267 O10 | X | 1072   | 1080   | 1.26782303  | 590    | 600    | -0.56035562  | 3330497  | 0.27964047  | 3640760 | 0.01337312  | experimental | Tocris | 1139 L-NIL hydrochloride               |
| 3267 O11 | X | 670    | 680    | 0.07477866  | 591    | 600    | -0.55770227  | 2858593  | -0.30881052 | 3606372 | -0.02803093 | experimental | Tocris | 1025 Nisoxetine hydrochloride          |
| 3267 O12 | X | 554    | 560    | -0.2694829  | 514    | 520    | -0.76201068  | 3024023  | -0.10229951 | 3762179 | 0.15956478  | experimental | Tocris | 1140 8-Bromo-cAMP, sodium salt         |
| 3267 O13 | X | 673    | 680    | 0.08368197  | 593    | 600    | -0.55239556  | 2968547  | -0.17170098 | 3927406 | 0.35850242  | experimental | Tocris | 1026 HomoAMPA                          |
| 3267 O14 | X | 720    | 730    | 0.19052177  | 540    | 560    | -0.67444993  | 3004320  | -0.17093006 | 3822232 | 0.23187016  | experimental | Tocris | 1141 Dibutyryl-cAMP, sodium salt       |
| 3267 O15 | X | 850    | 1160   | 1.50227702  | 1670   | 1680   | 2.30526888   | 3066541  | -0.04950522 | 3732419 | 0.12373296  | experimental | Tocris | 1027 PHCC                              |
| 3267 O16 | X | 782    | 800    | 0.67428954  | 748    | 760    | -0.14112327  | 3289869  | 0.2289785   | 3983045 | 0.42543223  | experimental | Tocris | 1142 N-kymenazoline hydrochloride      |
| 3267 O17 | X | 788    | 800    | 0.15497576  | 747    | 760    | -0.65437973  | 3524808  | 0.3835207   | 4053273 | 0.51004959  | experimental | Tocris | 1028 CCZOC                             |
| 3267 O18 | X | 2312   | 2320   | 4.9478604   | 2510   | 2520   | 4.53408793   | 2278043  | -1.03274001 | 2354041 | -1.53587029 | experimental | Tocris | 2926 FPA 124                           |
| 3267 O19 | X | 906    | 920    | 0.77517287  | 1386   | 1400   | 1.55171577   | 3724950  | 0.77151225  | 3682656 | 0.063817    | experimental | Tocris | 1029 Methyllycaonitine citrate         |
| 3267 O20 | X | 1072   | 1080   | 1.26782303  | 988    | 1000   | 0.49568007   | 3254707  | 0.18513248  | 3056353 | -0.69026823 | experimental | Tocris | 1144 U0126                             |
| 3267 O21 | X | 791    | 800    | 0.43387908  | 908    | 920    | 0.28341159   | 3630710  | 0.65399763  |         |             |              |        |                                        |



|          |   |        |        |             |        |        |             |          |             |          |             |              |        |      |                                  |
|----------|---|--------|--------|-------------|--------|--------|-------------|----------|-------------|----------|-------------|--------------|--------|------|----------------------------------|
| 3267 P13 | X | 392    | 400    | -0.75026198 | 752    | 760    | -0.13051195 | 2655437  | -0.56214033 | 3275107  | -0.42688268 | experimental | Tocris | 1345 | AF-DX 384                        |
| 3267 P14 | X | 1634   | 1640   | 2.93571093  | 1593   | 1600   | 2.10096046  | 2523282  | -0.72693389 | 3173864  | -0.5487819  | experimental | Tocris | 1505 | Mycophenolic acid                |
| 3267 P15 | X | 790    | 800    | -0.4309113  | 1067   | 1080   | 0.7052952   | 2759323  | -0.43259741 | 3384600  | -0.29505024 | experimental | Tocris | 1347 | Nafadotride                      |
| 3267 P16 | X | 554    | 560    | -0.2698929  | 1233   | 1240   | 1.1457523   | 2854928  | -0.31338067 | 3464860  | -0.19641509 | experimental | Tocris | 1506 | Tarazosin hydrochloride          |
| 3267 P17 | X | 515    | 520    | -0.38522602 | 1092   | 600    | -0.55504891 | 2920057  | -0.22166664 | 3741015  | -0.13408277 | experimental | Tocris | 1348 | IL-65 fumarate                   |
| 3267 P18 | X | 390    | 400    | -0.75619752 | 749    | 760    | -0.13847202 | 3469663  | 0.45317655  | 4114636  | 0.58393225  | experimental | Tocris | 1507 | FR 122047 hydrochloride          |
| 3267 P19 | X | 674    | 680    | 0.08664974  | 751    | 760    | -0.13316531 | 3101750  | -0.00560059 | 3554199  | -0.09084859 | experimental | Tocris | 1349 | (R)-(-)-Rolipram                 |
| 3267 P20 | X | 592    | 600    | -0.15670757 | 950    | 960    | 0.39485254  | 2892480  | -0.26655438 | 3413113  | -0.26071984 | experimental | Tocris | 1508 | GW 9662                          |
| 3267 P21 | X | 872    | 880    | 0.67426861  | 1547   | 1560   | 1.97890608  | 2743717  | -0.45205765 | 3585104  | -0.05363816 | experimental | Tocris | 1350 | (S)-(+)-Rolipram                 |
| 3267 P22 | X | 1392   | 1400   | 2.21751009  | 2427   | 2440   | 4.31385938  | 2772743  | -0.41586305 | 3387466  | -0.29159957 | experimental | Tocris | 1509 | TMS                              |
| 3267 P23 | E | 1035   | 1520   | 1.15801546  | 1694   | 2360   | 2.36894942  | 67740    | -3.78892557 | 67059    | -4.28945665 | empty        |        |      |                                  |
| 3267 P24 | E | 164176 | 164600 | 485.323319  | 224797 | 225440 | 594.340637  | 2737772  | -0.4594709  | 3175174  | -0.55310436 | empty        |        |      |                                  |
| 3268 A01 | N | 678    | 680    | -0.0563533  | 718    | 720    | 0.01534378  | 1325582  | -1.0411509  | 2554338  | 0.35770075  | empty        |        |      |                                  |
| 3268 A02 | E | 157    | 160    | -0.11557422 | 116    | 120    | -0.38702915 | 113361   | -3.5603463  | 141645   | -3.23487198 | empty        |        |      |                                  |
| 3268 A03 | X | 318    | 320    | -0.0972737  | 678    | 680    | -0.01139197 | 1441769  | -0.79969513 | 2490496  | 0.26263809  | experimental | Tocris | 1510 | Ozagrel hydrochloride            |
| 3268 A04 | X | 237    | 240    | -0.10648079 | 276    | 280    | -0.28008618 | 877174   | -1.97301676 | 956694   | -2.02123941 | experimental | Tocris | 1701 | A 77636 hydrochloride            |
| 3268 A05 | X | 156    | 160    | -0.11568788 | 236    | 240    | -0.30682193 | 833212   | -2.06437706 | 875146   | -2.14266684 | experimental | Tocris | 1511 | SR 59230A hydrochloride          |
| 3268 A06 | X | 676    | 680    | -0.05658063 | 475    | 480    | -0.14707586 | 1592433  | -0.48659046 | 1876423  | -0.65173515 | experimental | Tocris | 1702 | N6 -Cyclopropyladenosine         |
| 3268 A07 | X | 673    | 680    | -0.05692164 | 955    | 960    | 0.17375305  | 1553396  | -0.56771579 | 1975125  | -0.50476489 | experimental | Tocris | 1512 | SB 205384                        |
| 3268 A08 | X | 755    | 760    | -0.04760088 | 715    | 720    | 0.0133386   | 1520129  | -0.63685011 | 1927174  | -0.57616538 | experimental | Tocris | 1703 | 2-Chloro-N6-cyclopropyladenosine |
| 3268 A09 | X | 555    | 560    | -0.07033444 | 475    | 480    | -0.14707586 | 1268055  | -1.1607015  | 1512894  | -1.19304081 | experimental | Tocris | 1515 | CGP 7930                         |
| 3268 A10 | X | 555    | 560    | -0.07033444 | 436    | 640    | -0.0394645  | 1556896  | -0.56044221 | 1793870  | -0.77465906 | experimental | Tocris | 1704 | Acetaminophen                    |
| 3268 A11 | X | 675    | 680    | -0.0566943  | 635    | 440    | -0.1738116  | 1588375  | -0.49502365 | 2182025  | -0.19668455 | experimental | Tocris | 1516 | CGP 13501                        |
| 3268 A12 | X | 636    | 640    | -0.06112734 | 516    | 520    | -0.11967173 | 1659297  | -0.34763603 | 2405427  | 0.13596778  | experimental | Tocris | 1707 | Sulindac                         |
| 3268 A13 | X | 475    | 480    | -0.07942786 | 715    | 720    | 0.0133386   | 1417955  | -0.84918455 | 2033023  | -0.41855302 | experimental | Tocris | 1516 | SDZ 21009                        |
| 3268 A14 | X | 495    | 600    | -0.06556039 | 396    | 600    | -0.09878925 | 1369734  | -0.95363025 | 1823777  | -0.40231999 | experimental | Tocris | 2108 | Midonetacin                      |
| 3268 A15 | X | 437    | 440    | -0.08397457 | 435    | 440    | -0.1738116  | 1494852  | -0.68057985 | 2484022  | -0.24763781 | experimental | Tocris | 1518 | 5-iodo-A-85380 dihydrochloride   |
| 3268 A16 | X | 717    | 720    | -0.05192025 | 675    | 680    | -0.01339715 | 1478849  | -0.72263677 | 2252834  | -0.09124781 | experimental | Tocris | 1709 | CL 218872                        |
| 3268 A17 | X | 355    | 360    | -0.09306799 | 474    | 480    | -0.14774426 | 1659935  | -0.34631016 | 1747461  | -0.84376347 | experimental | Tocris | 1524 | LY 288513                        |
| 3268 A18 | X | 437    | 440    | -0.08374723 | 755    | 760    | 0.04007434  | 1621096  | -0.42702401 | 1833987  | -0.71492364 | experimental | Tocris | 1710 | CV 1808                          |
| 3268 A19 | X | 316    | 320    | -0.09750104 | 555    | 560    | -0.09360438 | 1727086  | -0.20675929 | 2029181  | -0.42427388 | experimental | Tocris | 1526 | Mevastatin                       |
| 3268 A20 | X | 475    | 480    | -0.07942786 | 435    | 440    | -0.1738116  | 1192930  | -1.31682366 | 1231648  | -1.61182446 | experimental | Tocris | 1742 | RG-9544 hydrochloride            |
| 3268 A21 | X | 636    | 640    | -0.06112734 | 677    | 680    | -0.01206036 | 1773418  | -0.11047374 | 2070891  | -0.36216643 | experimental | Tocris | 1529 | SMC-162                          |
| 3268 A22 | E | 480    | 480    | -0.08021762 | 352    | 480    | -0.08021762 | 10224371 | 1.66711293  | 16671929 | 1.90077399  | experimental | Tocris | 1743 | Bay 11-7085                      |
| 3268 A23 | E | 1583   | 2840   | 0.04651605  | 636    | 1440   | -0.0394645  | 119605   | -3.54737023 | 114370   | -3.27548528 | empty        |        |      |                                  |
| 3268 A24 | P | 430063 | 431280 | 48.7508914  | 275440 | 276040 | 183.637763  | 1535203  | -0.60552385 | 1711180  | -0.89778697 | empty        |        |      |                                  |
| 3268 B01 | N | 476    | 480    | -0.07931419 | 635    | 640    | -0.04013289 | 1688863  | -0.286193   | 1818824  | -0.7375018  | empty        |        |      |                                  |
| 3268 B02 | E | 117    | 120    | -0.12012093 | 116    | 120    | -0.38702915 | 126322   | -3.5334112  | 119113   | -3.26842281 | empty        |        |      |                                  |
| 3268 B03 | X | 402    | 440    | -0.08772561 | 315    | 320    | -0.25401883 | 1413158  | -0.85915351 | 1605286  | -1.05546633 | experimental | Tocris | 1965 | Simvastatin                      |
| 3268 B04 | X | 517    | 520    | -0.07465381 | 496    | 440    | -0.17314321 | 1403562  | -0.87099568 | 1675496  | -0.95092152 | experimental | Tocris | 2194 | R 59-022                         |
| 3268 B05 | X | 394    | 400    | -0.08863495 | 514    | 400    | -0.19548217 | 1769660  | -0.11628349 | 217818   | -1.25253828 | experimental | Tocris | 1514 | Etilprodil hydrochloride         |
| 3268 B06 | X | 433    | 440    | -0.08420191 | 534    | 600    | -0.06753703 | 2187009  | 0.74903664  | 2622433  | 0.45909775  | experimental | Tocris | 2195 | Eliprodil                        |
| 3268 B07 | X | 835    | 840    | -0.03850745 | 474    | 480    | -0.14774426 | 1825672  | -0.0018813  | 2133676  | -0.26867767 | experimental | Tocris | 1969 | SL 327                           |
| 3268 B08 | X | 432    | 440    | -0.08431557 | 394    | 400    | -0.20121574 | 1777083  | -0.10285727 | 2363884  | 0.074109    | experimental | Tocris | 2196 | 3-MATIDA                         |
| 3268 B09 | X | 556    | 560    | -0.07022077 | 476    | 480    | -0.14640747 | 1860793  | 0.07110593  | 2177643  | -0.20320948 | experimental | Tocris | 1970 | Norketamine hydrochloride        |
| 3268 B10 | X | 394    | 400    | -0.08863495 | 314    | 320    | -0.25468723 | 1618155  | -0.4331359  | 1726098  | -0.87557362 | experimental | Tocris | 2197 | L 755507                         |
| 3268 B11 | X | 475    | 480    | -0.07942786 | 436    | 440    | -0.17314321 | 1902765  | 0.15833068  | 2159929  | -0.22958616 | experimental | Tocris | 1971 | (+)-Anabasine hydrochloride      |
| 3268 B12 | X | 154    | 160    | -0.11591522 | 354    | 160    | -0.3616302  | 935493   | -1.85102025 | 1751544  | -1.99897841 | experimental | Tocris | 2198 | Mibepradil dihydrochloride       |
| 3268 B13 | X | 474    | 480    | -0.07931419 | 676    | 680    | -0.07931419 | 1896562  | -0.0546719  | 2040262  | -0.40777393 | experimental | Tocris | 1972 | Tianeptine                       |
| 3268 B14 | X | 154    | 160    | -0.11591522 | 74     | 80     | -0.41510168 | 986008   | -1.74684174 | 1026255  | -1.91766098 | experimental | Tocris | 2199 | CGP 71683 hydrochloride          |
| 3268 B15 | X | 516    | 520    | -0.07476748 | 635    | 640    | -0.04013289 | 1904308  | 0.16153729  | 2710835  | 0.59072951  | experimental | Tocris | 1974 | SANT-1                           |
| 3268 B16 | X | 393    | 400    | -0.08874862 | 753    | 760    | 0.03873755  | 1827015  | 0.00090967  | 2333256  | 0.02850298  | experimental | Tocris | 2200 | PD 160170                        |
| 3268 B17 | X | 435    | 440    | -0.08397457 | 714    | 720    | 0.0126702   | 1758298  | -0.1418956  | 2148175  | -0.24708822 | experimental | Tocris | 1975 | 6-Iodo-nordihydrocapsaicin       |
| 3268 B18 | X | 62     | 520    | -0.12637266 | 513    | 520    | -0.12167691 | 1875346  | 0.10134947  | 2299292  | -0.02207044 | experimental | Tocris | 2201 | PHU 22394 hydrochloride          |
| 3268 B19 | X | 475    | 480    | -0.07942786 | 595    | 600    | -0.06686863 | 1784992  | -0.08642106 | 2157443  | -0.23238789 | experimental | Tocris | 1979 | L-803,087 trifluoroacetate       |
| 3268 B20 | X | 715    | 720    | -0.05214759 | 553    | 560    | -0.09494116 | 1668283  | -0.32986163 | 2040262  | -0.40777393 | experimental | Tocris | 2202 | Zatebradine hydrochloride        |
| 3268 B21 | X | 393    | 400    | -0.08874862 | 393    | 400    | -0.20188413 | 1738945  | -0.18211433 | 1890497  | -0.63077854 | experimental | Tocris | 1982 | Rboxetine mesylate               |
| 3268 B22 | X | 546    | 560    | -0.07135745 | 752    | 760    | 0.03806916  | 1821096  | -0.01139099 | 2095299  | -0.32582218 | experimental | Tocris | 2203 | PALDA                            |
| 3268 B23 | E | 1337   | 2560   | 0.01855378  | 555    | 1160   | -0.09360438 | 126513   | -3.53301427 | 125182   | -3.25938588 | empty        |        |      |                                  |
| 3268 B24 | P | 415517 | 417480 | 47.0974797  | 204653 | 205880 | 136.324187  | 1716271  | -0.22923465 | 1958241  | -0.52990568 | empty        |        |      |                                  |
| 3268 C01 | N | 517    | 520    | -0.07465381 | 756    | 760    | 0.04074273  | 1722745  | -0.21578061 | 3022730  | 1.05515058  | empty        |        |      |                                  |
| 3268 C02 | E | 83     | 120    | -0.12398563 | 156    | 160    | -0.36029341 | 124792   | -3.53659079 | 124575   | -3.26028973 | empty        |        |      |                                  |
| 3268 C03 | X | 12115  | 12120  | 1.24366523  | 398    | 400    | -0.19548217 | 1897209  | 0.14678439  | 3032779  | 1.07011386  | experimental | Tocris | 1530 | Lovastatin                       |
| 3268 C04 | X | 79     | 120    | -0.1244403  | 112    | 120    | -0.38970273 | 927185   | -1.86908565 | 1085273  | -1.82978139 | experimental | Tocris | 1744 | Bay 11-7821                      |
| 3268 C05 | X | 795    | 800    | -0.04305417 | 755    | 760    | 0.04007434  | 2035258  | 0.43367301  | 2529910  | 0.32132672  | experimental | Tocris | 1531 | Icilin                           |
| 3268 C06 | X | 593    | 600    | -0.06601506 | 474    | 480    | -0.14774426 | 1581914  | -0.50845068 | 2166835  | -0.21930292 | experimental | Tocris | 1746 | Nemonapride                      |
| 3268 C07 | X | 313    | 320    | -0.09784204 | 275    | 280    | -0.28075458 | 1466997  | -0.74726718 | 1929329  | -0.57295652 | experimental | Tocris | 1540 | DCPIB                            |
| 3268 C08 | X | 636    | 640    | -0.06112734 | 356    | 360    | -0.2266147  | 1645940  | -0.37539408 | 1819908  | -0.18494652 | experimental | Tocris | 1747 | Isoproterenol hydrochloride      |
| 3268 C09 | X | 115    | 120    | -0.12034826 | 116    | 120    | -0.38702915 | 1069567  | -1.57319234 | 1190736  | -1.6727438  | experimental | Tocris | 1541 | HA14-1                           |
| 3268 C10 | X | 437    | 440    | -0.08374723 | 397    | 440    | -0.1921056  | 1070961  | -1.57029508 | 1170866  | -1.6308276  | experimental | Tocris | 1748 | IG 132                           |
| 3268 C11 | X | 474    | 480    | -0.07954153 | 474    | 480    | -0.14774426 | 1802936  | -0.04913047 | 2492296  | 0.26531834  | experimental | Tocris | 1742 | Spilimicin                       |
| 3268 C12 | X | 511    | 520    | -0.07533582 | 513    | 520    | -0.12167691 | 1577944  | -0.51670099 | 2425392  | 0.16569627  | experimental | Tocris | 2737 | TC 2559 difumarate               |
| 3268 C13 | X | 555    | 560    | -0.07033444 | 274    | 280    | -0.28142297 | 1898479  | 0.14942366  | 3098391  | 1.1678121   | experimental | Tocris | 1544 | (*)-Bay K 8644                   |

|          |   |        |             |             |        |        |             |             |             |             |             |              |        |      |                                 |
|----------|---|--------|-------------|-------------|--------|--------|-------------|-------------|-------------|-------------|-------------|--------------|--------|------|---------------------------------|
| 3268 D07 | X | 312    | 320         | -0.09795571 | 435    | 440    | -0.1738116  | 1965279     | 0.28824509  | 2800701     | 0.7245427   | experimental | Tocris | 1995 | Ro 19-4605                      |
| 3268 D08 | X | 635    | 640         | -0.06124101 | 676    | 680    | -0.01272875 | 2082007     | 0.53082515  | 3314160     | 1.48909866  | experimental | Tocris | 2214 | ABT 724 trihydrochloride        |
| 3268 D09 | X | 234    | 240         | -0.1068218  | 233    | 240    | -0.30882711 | 1352333     | -0.985579   | 1211761     | -1.64143694 | experimental | Tocris | 1996 | ZK 93426 hydrochloride          |
| 3268 D10 | X | 120    | 120         | -0.12048286 | 115    | 120    | -0.38769755 | 929452      | -1.86437445 | 862411      | -2.01272662 | experimental | Tocris | 2227 | CI 976                          |
| 3268 D11 | X | 480    | 480         | -0.07976886 | 552    | 560    | -0.05609592 | 2017508     | 2.396368    | 263368      | 0.53494002  | experimental | Tocris | 1997 | Ro 15-4513                      |
| 3268 D12 | X | 1754   | 1760        | 0.06595325  | 1434   | 1440   | 0.49391357  | 2175650     | 0.72543077  | 2962548     | 0.96553777  | experimental | Tocris | 2228 | Leflunomide                     |
| 3268 D13 | X | 511    | 520         | -0.07533582 | 432    | 440    | -0.17581679 | 2515764     | 1.43224382  | 2986952     | 1.00187606  | experimental | Tocris | 1999 | Linopiridine dihydrochloride    |
| 3268 D14 | X | 375    | 480         | -0.07942786 | 675    | 680    | -0.01339715 | 1609071     | -0.45201395 | 2119138     | -0.29032519 | experimental | Tocris | 2229 | GW 0742                         |
| 3268 D15 | X | 395    | 400         | -0.08852128 | 554    | 560    | -0.09427277 | 2203701     | 0.78372538  | 2937423     | 0.92812589  | experimental | Tocris | 2000 | XE 991 dihydrochloride          |
| 3268 D16 | X | 514    | 520         | -0.07499481 | 632    | 640    | -0.04213807 | 2149060     | 0.67017236  | 3912579     | 2.38016262  | experimental | Tocris | 2237 | BRL 50481                       |
| 3268 D17 | X | 352    | 360         | -0.093409   | 592    | 600    | -0.06887381 | 1888067     | 0.12778581  | 2708807     | 0.58770976  | experimental | Tocris | 2001 | GS59783                         |
| 3268 D18 | X | 765    | 1240        | -0.04646442 | 1393   | 1400   | 0.46509944  | 1638309     | -0.39125256 | 2497855     | -0.32509851 | experimental | Tocris | 2238 | GW 441756                       |
| 3268 D19 | X | 6152   | 6160        | 0.56586419  | 231    | 240    | -0.31016389 | 857239      | -2.01444498 | 880074      | -2.1353289  | experimental | Tocris | 2002 | Ro 31-8220 mesylate             |
| 3268 D20 | X | 538    | 560         | -0.07226679 | 486    | 560    | -0.13927353 | 2574513     | 1.55433394  | 2801401     | 0.72558502  | experimental | Tocris | 2239 | GW 583340 dihydrochloride       |
| 3268 D21 | X | 353    | 360         | -0.09329533 | 473    | 480    | -0.14841265 | 1787261     | -0.08170571 | 2045898     | -0.39938176 | experimental | Tocris | 2004 | Isradipine                      |
| 3268 D22 | X | 509    | 520         | -0.07556315 | 632    | 640    | -0.04213807 | 1669278     | -0.32689386 | 1866712     | -0.66619513 | experimental | Tocris | 2241 | DMAB-anabaseine dihydrochloride |
| 3268 D23 | E | 648    | 1200        | -0.05976333 | 579    | 1000   | -0.07756293 | 130732      | -3.52424649 | 125002      | -3.25965391 | empty        |        |      |                                 |
| 3268 D24 | P | 186241 | 187480      | 21.0361831  | 142150 | 143000 | 94.5475836  | 1852881     | 0.05466349  | 2180494     | -0.19896425 | empty        |        |      |                                 |
| 3268 E01 | N | 556    | 560         | -0.07022077 | 637    | 640    | -0.03087961 | 1737280     | -0.18557448 | 3171036     | 1.2759827   | empty        |        |      |                                 |
| 3268 E02 | E | 117    | 120         | -0.12012093 | 157    | 160    | -0.35962502 | 131244      | -3.52318247 | 134557      | -3.24542623 | empty        |        |      |                                 |
| 3268 E03 | X | 114    | 120         | -0.12046193 | 196    | 200    | -0.33355767 | 1037202     | -1.64045216 | 1334053     | -1.45934046 | experimental | Tocris | 1549 | CD 437                          |
| 3268 E04 | X | 475    | 480         | -0.07942786 | 513    | 520    | -0.12167691 | 1841051     | 0.0300788   | 2635218     | 0.47813352  | experimental | Tocris | 1762 | Acifran                         |
| 3268 E05 | X | 552    | 560         | -0.07067544 | 676    | 680    | -0.01272875 | 1958391     | 0.27393069  | 2953755     | 0.95244473  | experimental | Tocris | 1550 | SC 560                          |
| 3268 E06 | X | 152    | 160         | -0.11614256 | 154    | 160    | -0.3616302  | 882288      | -1.96238903 | 959028      | -2.01776401 | experimental | Tocris | 2747 | NNC 05-2090 hydrochloride       |
| 3268 E07 | X | 676    | 680         | -0.05658063 | 474    | 480    | -0.14774426 | 2627368     | 1.66417536  | 2917356     | 0.89824552  | experimental | Tocris | 1551 | STO-609 acetate                 |
| 3268 E08 | X | 471    | 480         | -0.07988253 | 594    | 600    | -0.07988253 | 1720255     | -2.22095324 | 3917462     | -1.14458738 | experimental | Tocris | 1567 | Mefenidine dihydrochloride      |
| 3268 E09 | X | 1315   | 1320        | 0.01605349  | 1476   | 1480   | 0.5219861   | 806453      | 0.8521587   | 2352092     | 0.80555035  | experimental | Tocris | 1554 | Picostatin                      |
| 3268 E10 | X | 589    | 600         | -0.06646973 | 390    | 400    | -0.20388932 | 2321057     | 1.02761052  | 276764      | 0.07988643  | experimental | Tocris | 1769 | Flurbiprofen                    |
| 3268 E11 | X | 394    | 400         | -0.08863495 | 675    | 680    | -0.01339715 | 1797957     | -0.05947765 | 2804270     | 0.72985705  | experimental | Tocris | 1555 | AG 825                          |
| 3268 E12 | X | 472    | 480         | -0.07976886 | 392    | 400    | -0.20255253 | 1226281     | -1.24751477 | 1410295     | -1.34581382 | experimental | Tocris | 1770 | Deguelin                        |
| 3268 E13 | X | 354    | 360         | -0.09318166 | 454    | 360    | -0.22795148 | 1649971     | -0.36701699 | 2492571     | 0.26572782  | experimental | Tocris | 1558 | Tracazolate hydrochloride       |
| 3268 E14 | X | 514    | 520         | -0.07499481 | 374    | 480    | -0.14774426 | 1685788     | -0.29258335 | 159154      | -0.23074016 | experimental | Tocris | 1771 | S 14506 hydrochloride           |
| 3268 E15 | X | 475    | 480         | -0.07942786 | 352    | 360    | -0.22928827 | 1960684     | 0.27906999  | 2667674     | 0.52646148  | experimental | Tocris | 1561 | (S)-SNAP 5114                   |
| 3268 E16 | X | 440    | 440         | -0.04762085 | 515    | 520    | -0.07522115 | 2180642     | 0.80056425  | 2445336     | 1.18298621  | experimental | Tocris | 1772 | Radipridil hydrochloride        |
| 3268 E17 | X | 674    | 680         | -0.05680797 | 510    | 520    | -0.12368209 | 1947427     | 0.25114569  | 2795064     | 0.71614904  | experimental | Tocris | 1579 | HEMADO                          |
| 3268 E18 | X | 671    | 680         | -0.05714897 | 1151   | 1160   | 0.30475819  | 1714624     | -0.23265738 | 2143873     | -0.25349403 | experimental | Tocris | 1777 | Artcigenin                      |
| 3268 E19 | X | 818    | 840         | -0.04043981 | 765    | 840    | 0.04675827  | 1083564     | -1.54410426 | 1437780     | -1.30488783 | experimental | Tocris | 1580 | Purvalanol A                    |
| 3268 E20 | X | 391    | 400         | -0.08897595 | 23911  | 23920  | 15.5173959  | 1405239     | -0.8756105  | 1730486     | -0.86903975 | experimental | Tocris | 1778 | Ro 106-9920                     |
| 3268 E21 | X | 674    | 680         | -0.05680797 | 645    | 720    | -0.03344895 | 2295936     | 0.97540494  | 2896728     | 0.8675298   | experimental | Tocris | 1581 | Purvalanol B                    |
| 3268 E22 | X | 871    | 880         | -0.03441541 | 592    | 600    | -0.06887381 | 2223501     | 0.82487305  | 2326666     | 0.01869027  | experimental | Tocris | 1997 | NNC 711                         |
| 3268 E23 | E | 1200   | -0.05820433 | 24687       | 569    | 569    | 126614      | -3.53280437 | 126614      | -3.26546877 | empty       |              |        |      |                                 |
| 3268 E24 | P | 181144 | 182560      | 20.4568184  | 145222 | 146080 | 96.6008886  | 2351125     | 1.09009679  | 2626160     | 0.46464588  | empty        |        |      |                                 |
| 3268 F01 | N | 637    | 640         | -0.06101368 | 396    | 400    | -0.19987895 | 2474133     | 1.34572773  | 2587699     | 0.40737629  | empty        |        |      |                                 |
| 3268 F02 | E | 156    | 160         | -0.11568788 | 117    | 120    | -0.38636076 | 134415      | -3.51659261 | 120404      | -3.26650047 | empty        |        |      |                                 |
| 3268 F03 | X | 477    | 480         | -0.07920052 | 456    | 360    | -0.2266147  | 1688060     | -0.28786176 | 2022851     | -0.43369944 | experimental | Tocris | 2005 | Ro 04-5595                      |
| 3268 F04 | X | 310    | 320         | -0.09818304 | 335    | 440    | -0.1738116  | 2350529     | 1.0888582   | 3023308     | 1.05601124  | experimental | Tocris | 2242 | Octopamine hydrochloride        |
| 3268 F05 | X | 1835   | 1840        | -0.07516034 | 354    | 360    | -0.22795148 | 1673546     | -1.31802425 | 1995361     | -0.47433507 | experimental | Tocris | 2006 | Paxilline                       |
| 3268 F06 | X | 440    | -0.08442924 | 594         | 594    | 600    | -0.06753703 | 2480088     | 1.3581032   | 3265877     | 1.42286212  | experimental | Tocris | 2251 | Isiplatin                       |
| 3268 F07 | X | 555    | 560         | -0.07033444 | 1155   | 1160   | 0.30743111  | 2187598     | 0.75026066  | 2856248     | 0.46464588  | experimental | Tocris | 2007 | Fluticasone propionate          |
| 3268 F08 | X | 474    | 480         | -0.07954153 | 553    | 560    | -0.09494116 | 1448087     | -0.78656528 | 1840969     | -0.70452723 | experimental | Tocris | 2252 | Doxorubicin hydrochloride       |
| 3268 F09 | X | 548    | 560         | -0.07113011 | 430    | 440    | -0.17715357 | 2121216     | 0.61230793  | 3175736     | 1.28298114  | experimental | Tocris | 2008 | SKF 86002 dihydrochloride       |
| 3268 F10 | X | 1793   | 1800        | 0.07038629  | 1196   | 1200   | 0.3348359   | 2011445     | 0.38418566  | 2298186     | -0.02371731 | experimental | Tocris | 2254 | ACDPD hydrochloride             |
| 3268 F11 | X | 592    | 600         | -0.06612873 | 313    | 320    | -0.25535562 | 3793963     | 4.08855239  | 4542776     | 3.31854498  | experimental | Tocris | 2009 | PSB 1115                        |
| 3268 F12 | X | 315    | 320         | -0.09761471 | 274    | 280    | -0.28142297 | 1446061     | -0.79077564 | 1605685     | -1.05487221 | experimental | Tocris | 2255 | CGS 9343B                       |
| 3268 F13 | X | 395    | 400         | -0.08852128 | 755    | 760    | 0.04007434  | 2142466     | 0.65946894  | 3220320     | 1.34936806  | experimental | Tocris | 2752 | MRS 1754                        |
| 3268 F14 | X | 755    | 760         | -0.04762088 | 514    | 520    | -0.12100851 | 2241248     | 0.86175424  | 3245330     | 1.38809774  | experimental | Tocris | 2261 | L-692,585                       |
| 3268 F15 | X | 313    | 320         | -0.09784204 | 473    | 480    | -0.14841265 | 1889579     | 0.13092799  | 2490078     | 0.26201567  | experimental | Tocris | 2011 | Tomoxetine hydrochloride        |
| 3268 F16 | X | 954    | 960         | -0.02498099 | 952    | 960    | 0.17174787  | 1914822     | -1.8338712  | 2541434     | 0.33848631  | experimental | Tocris | 2266 | DY131                           |
| 3268 F17 | X | 674    | 680         | -0.05680797 | 594    | 600    | -0.06753703 | 2134747     | 0.64042758  | 2811615     | 0.74079397  | experimental | Tocris | 2012 | PSB 11                          |
| 3268 F18 | X | 192    | 200         | -0.11159584 | 192    | 200    | -0.33623124 | 866481      | -1.99523858 | 934049      | -2.0549585  | experimental | Tocris | 2268 | NNC 55-0396 dihydrochloride     |
| 3268 F19 | X | 432    | 440         | -0.08431557 | 459    | 480    | -0.15777016 | 2113429     | 0.59612526  | 2271712     | -0.0631379  | experimental | Tocris | 2013 | Guggulsterone                   |
| 3268 F20 | X | 915    | 920         | -0.02941403 | 766    | 840    | 0.04742273  | 2021103     | 0.40425658  | 2567474     | 0.37726065  | experimental | Tocris | 2270 | SCH 58261                       |
| 3268 F21 | X | 431    | 440         | -0.08442924 | 594    | 760    | 0.03740077  | 2106678     | 0.58209556  | 2444607     | 0.19430798  | experimental | Tocris | 2018 | Mirtazepine                     |
| 3268 F22 | X | 630    | 640         | -0.06180935 | 550    | 560    | -0.09694634 | 2044951     | 0.45381666  | 2446299     | 0.19682742  | experimental | Tocris | 2018 | GW 4471                         |
| 3268 F23 | E | 681    | 1560        | -0.05601229 | 591    | 1040   | -0.06954221 | 131624      | -3.52239277 | 121771      | -3.26446497 | empty        |        |      |                                 |
| 3268 F24 | P | 299080 | 300280      | 33.862343   | 151400 | 152280 | 100.730224  | 1964761     | 0.2871686   | 2477963     | 0.24397607  | empty        |        |      |                                 |
| 3268 G01 | N | 477    | 480         | -0.07920052 | 677    | 680    | -0.01206036 | 1789891     | -0.07624013 | 3288213     | 1.45046279  | empty        |        |      |                                 |
| 3268 G02 | E | 116    | 120         | -0.1202346  | 75     | 80     | -0.41443229 | 131083      | -3.52351705 | 191770      | -3.16023434 | empty        |        |      |                                 |
| 3268 G03 | X | 596    | 600         | -0.06567406 | 756    | 760    | 0.04074273  | 1862998     | 0.07568829  | 3572897     | 1.87436586  | experimental | Tocris | 2681 | 17-PA                           |
| 3268 G04 | X | 515    | 520         | -0.07488115 | 585    | 585    | -0.09360438 | 1903654     | 0.1617817   | 250586      | 0.96303024  | experimental | Tocris | 1780 | NBQX-0532                       |
| 3268 G05 | X | 440    | 440         | -0.07078111 | 476    | 480    | -0.14640747 | 1541534     | -0.59236699 | 3582783     | 1.88922503  | experimental | Tocris | 1586 | SKF 83566 hydrobromide          |
| 3268 G06 | X | 555    | 560         | -0.07033444 | 354    | 360    | -0.22795148 | 2044847     | 0.45360054  | 2939489     | 0.93120222  | experimental | Tocris | 1794 | Ro 26-4590 trifluoroacetate     |
| 3268 G07 | X | 155    | 160         | -0.11580155 | 74     | 80     | -0.41510168 | 923924      | -1.87586254 | 1048842     | -1.88402825 | experimental | Tocris | 1588 | Ind                             |

|          |   |        |        |             |        |        |             |         |             |         |             |              |        |      |  |  |  |  |                                   |                             |
|----------|---|--------|--------|-------------|--------|--------|-------------|---------|-------------|---------|-------------|--------------|--------|------|--|--|--|--|-----------------------------------|-----------------------------|
| 3268 H01 | N | 276    | 280    | -0.10204775 | 596    | 600    | -0.06620024 | 1871357 | 0.09305967  | 2922670 | 0.90615822  | empty        |        |      |  |  |  |  |                                   |                             |
| 3268 H02 | E | 117    | 120    | -0.12012093 | 116    | 120    | -0.38702915 | 130587  | -3.52454782 | 118129  | -3.26988801 | empty        |        |      |  |  |  |  |                                   |                             |
| 3268 H03 | X | 395    | 400    | -0.08852128 | 432    | 440    | -0.17581679 | 1884515 | 0.12040417  | 2674296 | 0.53632184  | experimental | Tocris | 2019 |  |  |  |  | PSB 36                            |                             |
| 3268 H04 | X | 196    | 200    | -0.11114117 | 155    | 160    | -0.3609618  | 2215574 | 0.80839943  | 2129791 | -0.18065365 | experimental | Tocris | 2272 |  |  |  |  | Ro 08-2750                        |                             |
| 3268 H05 | X | 115    | 120    | -0.12034826 | 115    | 120    | -0.38769755 | 924610  | -1.87443692 | 966072  | -2.0073238  | experimental | Tocris | 2020 |  |  |  |  | CI 5                              |                             |
| 3268 H06 | X | 596    | 600    | -0.06567406 | 797    | 800    | 0.06814687  | 1762714 | -0.13271842 | 2535586 | 0.32977846  | experimental | Tocris | 2275 |  |  |  |  | TBB                               |                             |
| 3268 H07 | X | 153    | 160    | -0.11602889 | 114    | 120    | -0.38836594 | 932468  | -1.8581067  | 1008604 | -1.94394385 | experimental | Tocris | 2021 |  |  |  |  | LE 135                            |                             |
| 3268 H08 | X | 596    | 600    | -0.06567406 | 475    | 480    | -0.14707586 | 2155143 | 0.68281383  | 3413217 | 1.63659752  | experimental | Tocris | 2276 |  |  |  |  | FPL 55712                         |                             |
| 3268 H09 | X | 435    | 440    | -0.08397457 | 876    | 880    | 0.12094996  | 2001800 | 0.36414176  | 2692760 | 0.56381529  | experimental | Tocris | 2022 |  |  |  |  | SR 202                            |                             |
| 3268 H10 | X | 154    | 160    | -0.11591522 | 192    | 200    | -0.33623124 | 1005417 | -1.70650663 | 1183461 | -1.6837565  | experimental | Tocris | 2280 |  |  |  |  | Raloxifene hydrochloride          |                             |
| 3268 H11 | X | 396    | 400    | -0.08840761 | 676    | 680    | -0.01272875 | 1975135 | 0.30872749  | 2769562 | 0.67817579  | experimental | Tocris | 2283 |  |  |  |  | Medetomidine hydrochloride        |                             |
| 3268 H12 | X | 354    | 360    | -0.05318166 | 392    | 400    | -0.20255253 | 2563242 | 1.53091094  | 3314304 | 1.48933975  | experimental | Tocris | 2281 |  |  |  |  | 2'-MeCCPA                         |                             |
| 3268 H13 | X | 1155   | 1160   | -0.00213376 | 1075   | 1080   | 0.25396028  | 1896523 | 0.14535877  | 3127371 | 1.21096419  | experimental | Tocris | 2025 |  |  |  |  | Cinalukast                        |                             |
| 3268 H14 | X | 433    | 440    | -0.08420191 | 552    | 560    | -0.09560956 | 2234542 | 0.64781807  | 3861502 | 2.30410742  | experimental | Tocris | 2282 |  |  |  |  | Moxonidine hydrochloride          |                             |
| 3268 H15 | X | 554    | 560    | -0.07044481 | 631    | 640    | -0.04280646 | 2363003 | 1.11478124  | 3527311 | 1.80648693  | experimental | Tocris | 2037 |  |  |  |  | SDZ 205-557 hydrochloride         |                             |
| 3268 H16 | X | 514    | 520    | -0.07499481 | 514    | 520    | -0.12100851 | 2502409 | 1.40448992  | 3679460 | 2.03304139  | experimental | Tocris | 2284 |  |  |  |  | SEW 2871                          |                             |
| 3268 H17 | X | 876    | 880    | -0.03384707 | 555    | 560    | -0.09360438 | 1525291 | -0.62612262 | 1749143 | -0.84125892 | experimental | Tocris | 2029 |  |  |  |  | CI 898 trihydrochloride           |                             |
| 3268 H18 | X | 391    | 400    | -0.08897595 | 352    | 360    | -0.22928827 | 2164412 | 0.70207635  | 2931612 | 0.91947313  | experimental | Tocris | 2288 |  |  |  |  | O-1918                            |                             |
| 3268 H19 | X | 1034   | 1040   | -0.01588756 | 1053   | 1080   | 0.23925562  | 1296175 | -1.1022635  | 1256037 | -1.42660562 | experimental | Tocris | 2072 |  |  |  |  | Aminopurvalanol A                 |                             |
| 3268 H20 | X | 512    | 520    | -0.07522215 | 3072   | 3080   | 1.58874225  | 2166453 | 0.70631788  | 2597015 | 0.42124809  | experimental | Tocris | 2289 |  |  |  |  | Lamotrigine isethionate           |                             |
| 3268 H21 | X | 712    | 720    | -0.05248859 | 704    | 720    | 0.00598627  | 1998938 | 0.35819405  | 2354384 | 0.05996321  | experimental | Tocris | 2073 |  |  |  |  | (R)-(-)-Apomorphine hydrochloride |                             |
| 3268 H22 | X | 829    | 840    | -0.03918946 | 1109   | 1120   | 0.27668566  | 2421002 | 1.23531274  | 3322426 | 1.50140698  | experimental | Tocris | 2291 |  |  |  |  | 1,2,3,4,5,6-Hexabromocyclohexane  |                             |
| 3268 H23 | E | 887    | 1600   | -0.03259673 | 471    | 880    | -0.14974944 | 130950  | -3.52379345 | 124428  | -3.26050861 | empty        |        |      |  |  |  |  |                                   |                             |
| 3268 H24 | P | 240641 | 242200 | 27.219711   | 136810 | 137720 | 90.9783619  | 1927232 | 0.1998254   | 2485981 | 0.25591512  | empty        |        |      |  |  |  |  |                                   |                             |
| 3268 I01 | N | 637    | 640    | -0.06101368 | 437    | 440    | -0.17247482 | 1857173 | 0.06358297  | 3408865 | 1.63011726  | empty        |        |      |  |  |  |  |                                   |                             |
| 3268 I02 | E | 113    | 120    | -0.12034826 | 113    | 120    | -0.38702915 | 124991  | -3.5361728  | 117293  | -3.26988801 | empty        |        |      |  |  |  |  |                                   |                             |
| 3268 I03 | X | 716    | 720    | -0.05203392 | 1555   | 1560   | 0.5747892   | 1802664 | 0.04969573  | 3092401 | 1.15889281  | experimental | Tocris | 1615 |  |  |  |  |                                   | SB 366791                   |
| 3268 I04 | X | 475    | 480    | -0.07942786 | 553    | 560    | -0.09494116 | 1992299 | 0.34439711  | 2793208 | 0.7133854   | experimental | Tocris | 1808 |  |  |  |  |                                   | E-4031 dihydrochloride      |
| 3268 I05 | X | 234    | 240    | -0.1068218  | 355    | 360    | -0.22728309 | 1853119 | 0.05515809  | 2826137 | 0.76241767  | experimental | Tocris | 1616 |  |  |  |  |                                   | SB 216763                   |
| 3268 I06 | X | 593    | 600    | -0.06601506 | 553    | 560    | -0.09494116 | 2103145 | 0.57475341  | 2742434 | 0.63778138  | experimental | Tocris | 1809 |  |  |  |  |                                   | Altanserin hydrochloride    |
| 3268 I07 | X | 954    | 960    | -0.02498099 | 635    | 640    | -0.04013289 | 2514206 | 1.42900604  | 2950508 | 0.94760985  | experimental | Tocris | 1617 |  |  |  |  |                                   | SB 415286                   |
| 3268 I08 | X | 472    | 480    | -0.07976886 | 474    | 480    | -0.14774426 | 2116203 | 0.60189009  | 2864529 | 0.81958452  | experimental | Tocris | 1810 |  |  |  |  |                                   | Raclopridol                 |
| 3268 I09 | X | 514    | 520    | -0.07499481 | 391    | 400    | -0.20322092 | 2211716 | 0.80038187  | 2647906 | 0.49702633  | experimental | Tocris | 1620 |  |  |  |  |                                   | Alprostadil                 |
| 3268 I10 | X | 716    | 720    | -0.04760888 | 996    | 1000   | 0.29241577  | 1818742 | 0.24963694  | 2921071 | 1.19519356  | experimental | Tocris | 1813 |  |  |  |  |                                   | Imidubin-3'-oxime           |
| 3268 I11 | X | 555    | 560    | -0.07033444 | 513    | 520    | -0.12167691 | 2051502 | 0.46743072  | 2921714 | 0.90473471  | experimental | Tocris | 1621 |  |  |  |  |                                   | Streptozocin                |
| 3268 I12 | X | 194    | 200    | -0.11136851 | 155    | 160    | -0.3609618  | 1350857 | -0.98862528 | 1329376 | -1.46630466 | experimental | Tocris | 1814 |  |  |  |  |                                   | N-ArachidonylGABA           |
| 3268 I13 | X | 432    | 440    | -0.08431557 | 393    | 400    | -0.20188413 | 2348095 | 1.08379995  | 3756153 | 0.65820938  | experimental | Tocris | 1622 |  |  |  |  |                                   | Remacemide hydrochloride    |
| 3268 I14 | X | 434    | 440    | -0.08408824 | 431    | 440    | -0.17648518 | 1974862 | 0.30816015  | 2567058 | 0.37664122  | experimental | Tocris | 1816 |  |  |  |  |                                   | ICI 63197                   |
| 3268 I15 | X | 833    | 840    | -0.03873479 | 875    | 1640   | 0.62425032  | 1944850 | 0.24579026  | 2718724 | 0.60247647  | experimental | Tocris | 1625 |  |  |  |  |                                   | DFB                         |
| 3268 I16 | X | 274    | 280    | -0.02127508 | 311    | 320    | -0.25669241 | 1219900 | -1.26077554 | 1397391 | -1.36502827 | experimental | Tocris | 1819 |  |  |  |  |                                   | Demethylasterriquinone B1   |
| 3268 I17 | X | 234    | 240    | -0.1068218  | 235    | 240    | -0.37490324 | 1876589 | -1.97166099 | 2400258 | -2.00654236 | experimental | Tocris | 1634 |  |  |  |  |                                   | GTP 14564                   |
| 3268 I18 | X | 395    | 400    | -0.08852128 | 395    | 400    | -0.20054735 | 1983229 | 3.25548816  | 2585528 | 4.4041458   | experimental | Tocris | 1821 |  |  |  |  |                                   | YM 975                      |
| 3268 I19 | X | 592    | 600    | -0.06612873 | 471    | 480    | -0.14974944 | 2211572 | 0.80008261  | 2818115 | 0.75047267  | experimental | Tocris | 1636 |  |  |  |  |                                   | IEM 1460                    |
| 3268 I20 | X | 713    | 720    | -0.05237492 | 586    | 600    | -0.07288418 | 1894116 | 0.14035663  | 1901336 | -0.30521847 | experimental | Tocris | 1838 |  |  |  |  |                                   | IRL-2500                    |
| 3268 I21 | X | 697    | 720    | -0.05419361 | 471    | 480    | -0.14974944 | 2158807 | 0.69042823  | 2984749 | 0.99859573  | experimental | Tocris | 1638 |  |  |  |  |                                   | U 186664                    |
| 3268 I22 | X | 867    | 880    | -0.03487008 | 800    | 840    | 0.07015205  | 2088877 | 0.54510215  | 2368849 | 0.08150203  | experimental | Tocris | 1842 |  |  |  |  |                                   | RHC 80267                   |
| 3268 I23 | E | 940    | 1840   | -0.02657234 | 659    | 1120   | -0.02409414 | 129070  | -3.5277004  | 120570  | -3.26625329 | empty        |        |      |  |  |  |  |                                   |                             |
| 3268 I24 | P | 304968 | 306460 | 34.531619   | 155713 | 156600 | 103.613006  | 1946701 | 0.24963694  | 2789590 | 0.08739959  | empty        |        |      |  |  |  |  |                                   |                             |
| 3268 J01 | N | 637    | 640    | -0.06112734 | 356    | 360    | -0.0266147  | 1895100 | 0.14677971  | 2788977 | 0.70708831  | empty        |        |      |  |  |  |  |                                   |                             |
| 3268 J02 | E | 156    | 160    | -0.11568788 | 156    | 160    | -0.36029341 | 130676  | -3.52436287 | 116366  | -3.27251317 | empty        |        |      |  |  |  |  |                                   |                             |
| 3268 J03 | X | 395    | 400    | -0.08852128 | 633    | 640    | -0.04146968 | 2000117 | 0.36064421  | 2388762 | 0.11115309  | experimental | Tocris | 2074 |  |  |  |  |                                   | SKF 83959 hydrobromide      |
| 3268 J04 | X | 594    | 600    | -0.06590139 | 354    | 360    | -0.22795148 | 2204912 | 0.78624203  | 2852485 | 0.80218669  | experimental | Tocris | 2292 |  |  |  |  |                                   | AQ-RA 741                   |
| 3268 J05 | X | 835    | 840    | -0.03850745 | 475    | 480    | -0.14707586 | 2283985 | 0.95056879  | 2706011 | 0.58354643  | experimental | Tocris | 2076 |  |  |  |  |                                   | Y-26763                     |
| 3268 J06 | X | 592    | 600    | -0.06612873 | 595    | 600    | -0.06686863 | 2396003 | 1.18336069  | 3073907 | 1.13135468  | experimental | Tocris | 2293 |  |  |  |  |                                   | Zebularine                  |
| 3268 J07 | X | 744    | 760    | -0.04885122 | 388    | 400    | -0.2052261  | 2303429 | 0.99097663  | 2853449 | 0.80308606  | experimental | Tocris | 2077 |  |  |  |  |                                   | Y-27152                     |
| 3268 J08 | X | 553    | 560    | -0.07056177 | 554    | 560    | -0.09427277 | 2036071 | 0.43352556  | 3251075 | 1.39516319  | experimental | Tocris | 2294 |  |  |  |  |                                   | Cordycepin                  |
| 3268 J09 | X | 514    | 520    | -0.07499481 | 595    | 600    | -0.06686863 | 2218425 | 0.81432428  | 2802523 | 0.72725571  | experimental | Tocris | 2078 |  |  |  |  |                                   | UBP 296                     |
| 3268 J10 | X | 634    | 640    | -0.06135468 | 392    | 400    | -0.20255253 | 2139332 | 0.64995597  | 3100018 | 1.17023475  | experimental | Tocris | 2295 |  |  |  |  |                                   | (±)-Cloprosteno sodium salt |
| 3268 J11 | X | 474    | 480    | -0.07954153 | 514    | 520    | -0.12034012 | 2150723 | 0.67362835  | 2885866 | 0.85135596  | experimental | Tocris | 2079 |  |  |  |  |                                   | UBP 302                     |
| 3268 J12 | X | 554    | 560    | -0.07044481 | 514    | 560    | -0.09427277 | 2158066 | 0.68888831  | 2748997 | 0.64755388  | experimental | Tocris | 2296 |  |  |  |  |                                   | Prostaglandin E2            |
| 3268 J13 | X | 995    | 1000   | -0.02032061 | 875    | 880    | 0.12028157  | 1840924 | 0.02981487  | 2548973 | 0.34971211  | experimental | Tocris | 3037 |  |  |  |  |                                   | SU 5416                     |
| 3268 J14 | X | 351    | 360    | -0.09352266 | 668    | 680    | -0.0180759  | 1967226 | 0.29229128  | 2857034 | 0.80842424  | experimental | Tocris | 2299 |  |  |  |  |                                   | SCH 39166 hydrobromide      |
| 3268 J15 | X | 1153   | 1160   | -0.0023611  | 2390   | 2400   | -0.13289783 | 1894734 | 0.14164093  | 2400456 | 1.12856581  | experimental | Tocris | 2086 |  |  |  |  |                                   | TD 14564                    |
| 3268 J16 | X | 473    | 480    | -0.07955519 | 710    | 720    | 0.00999663  | 1912872 | 0.17933469  | 2402634 | 0.15881146  | experimental | Tocris | 2301 |  |  |  |  |                                   | T 0070907                   |
| 3268 J17 | X | 394    | 400    | -0.08863495 | 394    | 400    | -0.20121574 | 2052785 | 0.47009701  | 2584423 | 0.40249823  | experimental | Tocris | 2088 |  |  |  |  |                                   | DMNB                        |
| 3268 J18 | X | 514    | 520    | -0.07499481 | 593    | 600    | -0.06820542 | 2328247 | 1.04255253  | 2858898 |             |              |        |      |  |  |  |  |                                   |                             |

|          |   |        |        |             |        |        |             |         |             |         |             |              |        |      |                                   |
|----------|---|--------|--------|-------------|--------|--------|-------------|---------|-------------|---------|-------------|--------------|--------|------|-----------------------------------|
| 3268 K19 | X | 673    | 680    | -0.05692164 | 393    | 400    | -0.20188413 | 1849555 | 0.04775151  | 1895567 | -0.62322916 | experimental | Tocris | 1660 | Salmeterol                        |
| 3268 K20 | X | 671    | 680    | -0.05714897 | 349    | 360    | -0.23129345 | 2313230 | 1.01134472  | 2270430 | -0.06504683 | experimental | Tocris | 1866 | MRS 1845                          |
| 3268 K21 | X | 1426   | 1480   | 0.02867021  | 2073   | 2080   | 0.92101707  | 3503792 | 3.48552914  | 3179161 | 1.28808017  | experimental | Tocris | 1661 | SB 206553 hydrochloride           |
| 3268 K22 | X | 466    | 480    | -0.08045087 | 518    | 560    | -0.11833494 | 941226  | -1.83990613 | 957969  | -2.01934089 | experimental | Tocris | 1867 | NSC 663284                        |
| 3268 K23 | E | 1024   | 1840   | -0.01702424 | 419    | 880    | -0.1845059  | 128314  | 152927149   | 122021  | -0.26409271 | empty        |        |      |                                   |
| 3268 K24 | P | 276884 | 278200 | 31.3393727  | 155527 | 156560 | 103.488684  | 1991271 | 0.34226076  | 2492995 | 0.26635917  | empty        |        |      |                                   |
| 3268 L01 | N | 356    | 360    | -0.09295433 | 475    | 480    | -0.14707586 | 1811660 | -0.03100055 | 2268980 | -0.06720593 | experimental | Tocris | 2096 | DAU 5884 hydrochloride            |
| 3268 L02 | E | 277    | 280    | -0.10193408 | 157    | 160    | -0.35962502 | 126748  | -3.3252529  | 118485  | -3.26935792 | experimental | Tocris | 2309 | SR 142948                         |
| 3268 L03 | X | 476    | 480    | -0.07931419 | 356    | 360    | -0.2266147  | 2161068 | 0.69512696  | 2287017 | -0.04034829 | experimental | Tocris | 2310 | SK1 II                            |
| 3268 L04 | X | 473    | 480    | -0.07965519 | 154    | 560    | -0.09427277 | 2203136 | 0.78255121  | 2851722 | 0.80051451  | experimental | Tocris | 2311 | SR 49059                          |
| 3268 L05 | X | 1155   | 1160   | -0.00213376 | 1055   | 1040   | 0.22722454  | 1852171 | 0.05318799  | 2264906 | -0.07327224 | experimental | Tocris | 2098 | Apoptosis Activator 2             |
| 3268 L06 | X | 552    | 560    | -0.07067544 | 433    | 440    | -0.17514839 | 2098172 | 0.56441869  | 237844  | 0.69351578  | experimental | Tocris | 2312 | L-168,049                         |
| 3268 L07 | X | 466    | 480    | -0.08045087 | 389    | 400    | -0.20455771 | 2382639 | 1.15558809  | 2275417 | -0.05762104 | experimental | Tocris | 2098 | Apoptosis Activator 2             |
| 3268 L08 | X | 553    | 560    | -0.07056177 | 434    | 440    | -0.17448    | 2465919 | 1.32865768  | 2930658 | 0.9180526   | experimental | Tocris | 2311 | L-168,049                         |
| 3268 L09 | X | 394    | 400    | -0.08863495 | 515    | 520    | -0.12034012 | 2213057 | 0.80316869  | 2825152 | 0.76095098  | experimental | Tocris | 2132 | Amisulpride                       |
| 3268 L10 | X | 472    | 480    | -0.07976886 | 351    | 360    | -0.22995666 | 2162076 | 0.69722175  | 2797710 | 0.72008901  | experimental | Tocris | 2312 | DNQX disodium salt                |
| 3268 L11 | X | 1355   | 1360   | 0.0205998   | 1396   | 1400   | 0.46851462  | 1797573 | -0.06027567 | 2838614 | 0.7809963   | experimental | Tocris | 2137 | 2,3-DCE hydrochloride             |
| 3268 L12 | X | 473    | 480    | -0.07965519 | 354    | 360    | -0.22795148 | 2292310 | 0.96786951  | 2892512 | 0.86125205  | experimental | Tocris | 2313 | QX 314 chloride                   |
| 3268 L13 | X | 195    | 200    | -0.11125484 | 115    | 120    | -0.38769755 | 850799  | -2.02782837 | 937334  | -2.04932252 | experimental | Tocris | 2139 | Lylamine hydrochloride            |
| 3268 L14 | X | 316    | 320    | -0.09750104 | 756    | 760    | 0.04074273  | 1323903 | -1.04464014 | 2011332 | -0.45085158 | experimental | Tocris | 2314 | LOE 908 hydrochloride             |
| 3268 L15 | X | 314    | 320    | -0.09772837 | 354    | 360    | -0.22795148 | 1093411 | -1.52364057 | 1418883 | -1.33302603 | experimental | Tocris | 2141 | Paroxetine maleate                |
| 3268 L16 | X | 512    | 520    | -0.07522215 | 710    | 720    | 0.00999663  | 2910214 | 2.25197605  | 3145601 | 1.23810921  | experimental | Tocris | 2143 | Immethidine dihydrobromide        |
| 3268 L17 | X | 1312   | 1320   | 0.01571208  | 1553   | 1560   | 0.57345241  | 2098877 | 0.5658838   | 2537112 | 0.33205072  | experimental | Tocris | 2135 | SCS                               |
| 3268 L18 | X | 1110   | 1120   | -0.00724881 | 912    | 920    | 0.14501213  | 1630052 | -0.40841197 | 2035403 | -0.41500913 | experimental | Tocris | 2116 | AMG 9810                          |
| 3268 L19 | X | 632    | 640    | -0.06158202 | 394    | 400    | -0.20121574 | 2235717 | 0.85025991  | 2487452 | 0.25810548  | experimental | Tocris | 2147 | Nicorandil                        |
| 3268 L20 | X | 561    | 600    | -0.06965243 | 394    | 440    | -0.22121574 | 2446070 | 0.28740083  | 2446070 | 0.2956568   | experimental | Tocris | 2318 | Pravastatin sodium salt           |
| 3268 L21 | X | 11810  | 11840  | -0.20899656 | 510    | 520    | -0.1236899  | 2190384 | 0.75605048  | 2240517 | -0.10958819 | experimental | Tocris | 2148 | (4S)-Mefl 5652                    |
| 3268 L22 | X | 398    | 440    | -0.08818028 | 511    | 520    | -0.12301369 | 1712776 | -0.23649783 | 1925365 | -0.57885904 | experimental | Tocris | 2322 | BTS 54-505                        |
| 3268 L23 | E | 763    | 1280   | -0.04669153 | 608    | 1160   | -0.05817952 | 129770  | -3.52624568 | 123652  | -3.2616644  | empty        |        |      |                                   |
| 3268 L24 | P | 173159 | 174640 | 19.549181   | 187246 | 188120 | 124.68946   | 2019609 | 0.4011518   | 2425576 | 0.16597205  | empty        |        |      |                                   |
| 3268 M01 | N | 477    | 480    | -0.07920052 | 677    | 680    | -0.01206036 | 1773652 | -0.10998745 | 2987730 | 1.00303453  | empty        |        |      |                                   |
| 3268 M02 | E | 116    | 120    | -0.1202346  | 156    | 160    | -0.36029341 | 123780  | -3.53869389 | 1281159 | -3.25495304 | experimental | Tocris | 1662 | SKF 77434 hydrobromide            |
| 3268 M03 | X | 436    | 440    | -0.0838609  | 517    | 520    | -0.11900333 | 1775492 | -0.10616363 | 3174472 | 1.28109901  | experimental | Tocris | 1868 | U0124                             |
| 3268 M04 | X | 391    | 400    | -0.08897595 | 432    | 440    | -0.17581679 | 1813532 | -0.02711023 | 2522446 | 0.31021266  | experimental | Tocris | 1663 | BW 373U86                         |
| 3268 M05 | X | 554    | 560    | -0.0704481  | 554    | 560    | -0.09427277 | 1773231 | -0.11086236 | 2683442 | 0.54994051  | experimental | Tocris | 1869 | Isapirone                         |
| 3268 M07 | X | 433    | 440    | -0.08420191 | 473    | 480    | -0.14841265 | 1935904 | 0.22719899  | 2205411 | -0.16186209 | experimental | Tocris | 1664 | GW 1929                           |
| 3268 M08 | X | 714    | 720    | -0.05226126 | 554    | 560    | -0.09427277 | 2171214 | 0.71621203  | 2847454 | 0.79415933  | experimental | Tocris | 1870 | BTS                               |
| 3268 M09 | X | 473    | 480    | -0.07965519 | 553    | 560    | -0.09494116 | 1246957 | -1.20454663 | 1688203 | -0.93200042 | experimental | Tocris | 1671 | PD 102807                         |
| 3268 M10 | X | 795    | 800    | -0.04305417 | 795    | 800    | 0.06681008  | 1773427 | -0.11045504 | 2408059 | 0.1398869   | experimental | Tocris | 1937 | NSC 693868                        |
| 3268 M11 | X | 400    | 480    | -0.08885229 | 448    | 432    | -0.08885229 | 1959962 | 0.27719549  | 2181822 | 0.2181822   | experimental | Tocris | 1672 | ZD 2079 hydrochloride             |
| 3268 M12 | X | 351    | 360    | -0.09352266 | 353    | 360    | -0.22861988 | 1352343 | -1.21241872 | 1587887 | -1.08137987 | experimental | Tocris | 1941 | m-3M3FBS                          |
| 3268 M13 | X | 475    | 480    | -0.07942786 | 396    | 400    | -0.19987895 | 1747891 | -0.16352307 | 2429829 | 0.17230309  | experimental | Tocris | 2719 | RWJ 21757                         |
| 3268 M14 | X | 435    | 440    | -0.08397457 | 394    | 400    | -0.20121574 | 2010837 | 0.38292214  | 2575151 | 0.38869194  | experimental | Tocris | 1942 | o-3M3FBS                          |
| 3268 M15 | X | 476    | 480    | -0.07931419 | 435    | 440    | -0.1738116  | 1914824 | 0.18339127  | 2357834 | 0.06510036  | experimental | Tocris | 1674 | LE 300                            |
| 3268 M16 | X | 514    | 520    | -0.07499481 | 914    | 920    | 0.14634892  | 1593913 | -0.48351477 | 1701868 | -0.91165282 | experimental | Tocris | 1944 | Lorazidine                        |
| 3268 M17 | X | 432    | 440    | -0.08431557 | 350    | 360    | -0.23062506 | 4676778 | 5.92318773  | 4621619 | 3.43594459  | experimental | Tocris | 1675 | YM 97099                          |
| 3268 M18 | X | 632    | 640    | -0.06158202 | 394    | 400    | -0.20121574 | 2010837 | 0.38292214  | 2575151 | 0.38869194  | experimental | Tocris | 1942 | o-3M3FBS                          |
| 3268 M19 | X | 514    | 520    | -0.07499481 | 914    | 920    | 0.14634892  | 1593913 | -0.48351477 | 1701868 | -0.91165282 | experimental | Tocris | 1944 | Lorazidine                        |
| 3268 M20 | X | 453    | 480    | -0.08192855 | 675    | 680    | -0.01339715 | 2032641 | 0.42823445  | 2641641 | 0.48769756  | experimental | Tocris | 1952 | DCB                               |
| 3268 M21 | X | 7680   | 7720   | 7.3954858   | 313    | 320    | -0.25535562 | 935231  | -1.85236473 | 989601  | -1.97223989 | experimental | Tocris | 1677 | GW 7647                           |
| 3268 M22 | X | 930    | 960    | -0.02770901 | 832    | 840    | 0.09154064  | 2152428 | 0.67717162  | 2269725 | -0.0660966  | experimental | Tocris | 1953 | DMeOB                             |
| 3268 M23 | E | 798    | 1480   | -0.04271316 | 654    | 1080   | -0.02743341 | 127985  | -3.52995521 | 119702  | -3.26754577 | empty        |        |      |                                   |
| 3268 M24 | P | 230901 | 232040 | 26.1125867  | 143228 | 144200 | 95.2681118  | 2050959 | 0.46630228  | 2292206 | -0.03262171 | empty        |        |      |                                   |
| 3268 N01 | N | 475    | 480    | -0.07942786 | 515    | 520    | -0.12034012 | 1850595 | 0.0499128   | 2541687 | 0.33886303  | empty        |        |      |                                   |
| 3268 N02 | E | 237    | 240    | -0.10648079 | 157    | 160    | -0.35962502 | 125159  | -3.5358281  | 111577  | -3.27964414 | experimental | Tocris | 2150 | nTZDpa                            |
| 3268 N03 | X | 195    | 200    | -0.11125484 | 154    | 160    | -0.3616302  | 1202033 | -1.29790612 | 958884  | -2.01797843 | experimental | Tocris | 2150 | nTZDpa                            |
| 3268 N04 | X | 634    | 640    | -0.06135468 | 795    | 800    | 0.06681008  | 1976452 | 0.31146443  | 2641882 | 0.48805641  | experimental | Tocris | 2324 | Necrostatin-1                     |
| 3268 N05 | X | 874    | 880    | -0.03407441 | 753    | 760    | 0.03873755  | 2152520 | 0.67736281  | 2826811 | 0.76342128  | experimental | Tocris | 2151 | API-2                             |
| 3268 N06 | X | 513    | 520    | -0.07510848 | 593    | 600    | -0.06820542 | 1862677 | 0.0750212   | 2319859 | 0.00855444  | experimental | Tocris | 2327 | WIN 55,212-3 mesylate             |
| 3268 N07 | X | 514    | 520    | -0.07499481 | 754    | 760    | 0.03940595  | 1544538 | -0.58612418 | 1998517 | -0.4699335  | experimental | Tocris | 2152 | NSC 625987                        |
| 3268 N08 | X | 554    | 560    | -0.0704481  | 632    | 640    | -0.04213807 | 2285062 | 0.95280697  | 2843324 | 0.78800963  | experimental | Tocris | 2329 | Ro 10-5824                        |
| 3268 N09 | X | 514    | 520    | -0.07499481 | 754    | 760    | 0.03940595  | 1544538 | -0.58612418 | 1998517 | -0.4699335  | experimental | Tocris | 2152 | NSC 625987                        |
| 3268 N10 | X | 514    | 520    | -0.07499481 | 754    | 760    | 0.03940595  | 1544538 | -0.58612418 | 1998517 | -0.4699335  | experimental | Tocris | 2152 | NSC 625987                        |
| 3268 N11 | X | 151    | 160    | -0.11625622 | 113    | 120    | -0.38903434 | 981342  | -1.75653846 | 1144995 | -1.74085353 | experimental | Tocris | 2155 | NTNCB hydrochloride               |
| 3268 N12 | X | 1755   | 1760   | 0.06606691  | 1236   | 1240   | 0.36157165  | 2280617 | 0.94356952  | 2651090 | 0.5017674   | experimental | Tocris | 2333 | JM1 26259685                      |
| 3268 N13 | X | 751    | 760    | -0.04805555 | 512    | 520    | -0.1223453  | 1747815 | -0.16368101 | 2587827 | 0.40756689  | experimental | Tocris | 2156 | Embelin                           |
| 3268 N14 | X | 474    | 480    | -0.07949481 | 475    | 480    | -0.14707586 | 1808658 | -0.03723291 | 2487366 | 0.25797742  | experimental | Tocris | 2337 | Trequinsin hydrochloride          |
| 3268 N15 | X | 234    | 240    | -0.1068218  | 194    | 200    | -0.33489446 | 856935  | -2.01507675 | 914978  | -2.08335579 | experimental | Tocris | 2160 | Bax channel blocker               |
| 3268 N16 | X | 555    | 560    | -0.07033444 | 714    | 720    | 0.01267078  | 2336640 | 1.05999457  | 3245025 | 0.57275543  | experimental | Tocris | 2154 | ZD 2079 hydrochloride             |
| 3268 N17 | X | 314    | 320    | -0.09772837 | 354    | 360    | -0.06753703 | 1925026 | 0.20459271  | 2612210 | 0.44387398  | experimental | Tocris | 2330 | DMP 543                           |
| 3268 N18 | X | 554    | 560    | -0.0704481  | 474    | 480    | -0.14774426 | 2195060 | 0.76576795  | 2805335 | 0.73144287  | experimental | Tocris | 2342 | 4-Methylhistamine dihydrochloride |
| 3268 N19 | X | 393    | 400    | -0.08874862 | 472    | 480    | -0.14908104 | 2002818 | 0.36625733  | 2435601 | 0.18089777  | experimental | Tocris | 2162 | INCA-6                            |
| 3268 N20 | X | 594    | 600    | -0.06590139 | 633    | 640    | -0.04146968 | 2372700 | 1.1349332   | 26      |             |              |        |      |                                   |

|          |   |        |           |             |        |        |             |         |             |          |              |              |        |      |                           |
|----------|---|--------|-----------|-------------|--------|--------|-------------|---------|-------------|----------|--------------|--------------|--------|------|---------------------------|
| 3268 O13 | X | 474    | 480       | -0.07954153 | 594    | 600    | -0.06753703 | 1664984 | -0.3358175  | 2230003  | -0.12524386  | experimental | Tocris | 1695 | Cisapride                 |
| 3268 O14 | X | 594    | 600       | -0.06590139 | 714    | 720    | 0.0126702   | 1855166 | 0.0594121   | 2393579  | 0.11832575   | experimental | Tocris | 1960 | SB 334867                 |
| 3268 O15 | X | 508    | 520       | -0.07567682 | 348    | 360    | -0.23196185 | 1450666 | -0.78120569 | 1929428  | -0.57280911  | experimental | Tocris | 1697 | Noscapine hydrochloride   |
| 3268 O16 | X | 554    | 560       | -0.07044481 | 434    | 440    | -0.174448   | 1701456 | -0.26003266 | 1923495  | -0.58164352  | experimental | Tocris | 1961 | EMD 386088 hydrochloride  |
| 3268 O17 | X | 513    | 520       | -0.07510848 | 434    | 440    | -0.174448   | 1644770 | -0.37782553 | 17050803 | -0.90686112  | experimental | Tocris | 1698 | L 655240                  |
| 3268 O18 | X | 872    | 880       | -0.03430175 | 591    | 600    | -0.06954221 | 2114504 | 0.59835928  | 2532665  | 0.325429     | experimental | Tocris | 1962 | SB 239063                 |
| 3268 O19 | X | 793    | 800       | -0.0432815  | 952    | 960    | 0.17174787  | 1661276 | -0.34352334 | 2140260  | -0.25887389  | experimental | Tocris | 1699 | CGS 15943                 |
| 3268 O20 | X | 591    | 600       | -0.06624239 | 872    | 880    | 0.11827639  | 2120478 | 0.61077424  | 2514518  | 0.29840757   | experimental | Tocris | 1963 | SB 408124                 |
| 3268 O21 | X | 873    | 880       | -0.03418808 | 713    | 720    | 0.01200181  | 2133366 | 0.63755763  | 2524459  | 0.31321002   | experimental | Tocris | 1700 | BIIE 0246 formate         |
| 3268 O22 | X | 269    | 280       | -0.10284342 | 430    | 440    | -0.17715357 | 884491  | -1.95781083 | 819732   | -2.22517996  | experimental | Tocris | 1964 | Gossypol                  |
| 3268 O23 | E | 579    | 1240      | -0.06760641 | 495    | 1040   | -0.13370799 | 122367  | -3.54163034 | 115023   | -3.27451294  | empty        |        |      |                           |
| 3268 O24 | P | 224360 | 25.172554 |             | 184174 | 185360 | 122.636155  | 1930523 | 0.21601639  | 215174   | -0.21284201  | empty        |        |      |                           |
| 3268 P01 | N | 637    | 640       | -0.06101368 | 837    | 840    | 0.09488261  | 1638789 | -0.39025504 | 1943546  | -0.55178698  | empty        |        |      |                           |
| 3268 P02 | E | 196    | 200       | -0.11114117 | 115    | 120    | -0.38769755 | 114783  | -3.55739115 | 110696   | -3.28095598  | empty        |        |      |                           |
| 3268 P03 | X | 517    | 520       | -0.07465381 | 637    | 640    | -0.0387961  | 1489117 | -0.70129817 | 1762904  | -0.82076837  | experimental | Tocris | 2173 | WAY 629 hydrochloride     |
| 3268 P04 | X | 356    | 360       | -0.09295433 | 396    | 400    | -0.19987895 | 1650847 | -0.36519652 | 2081309  | -0.34665371  | experimental | Tocris | 2347 | Salubralin                |
| 3268 P05 | X | 516    | 520       | -0.07476748 | 615    | 520    | -0.12034012 | 1780064 | -0.09666226 | 2291002  | -0.0344145   | experimental | Tocris | 2175 | Tetrabenzazine            |
| 3268 P06 | X | 396    | 400       | -0.08840761 | 677    | 680    | -0.01206036 | 1623175 | -0.42270351 | 2196202  | -0.17557457  | experimental | Tocris | 2348 | Galvestin                 |
| 3268 P07 | X | 116    | 120       | -0.1202346  | 115    | 120    | -0.38769755 | 772637  | -2.19028191 | 829805   | -2.21018096  | experimental | Tocris | 2176 | BVT 948                   |
| 3268 P08 | X | 397    | 400       | -0.08829395 | 477    | 480    | -0.14573907 | 2007301 | 0.37555735  | 2399315  | 0.12686682   | experimental | Tocris | 2372 | ABT 702 dihydrochloride   |
| 3268 P09 | X | 317    | 320       | -0.09738737 | 276    | 280    | -0.28008618 | 922934  | -1.87791993 | 1043484  | -1.89200648  | experimental | Tocris | 2183 | ZK 164015                 |
| 3268 P10 | X | 276    | 280       | -0.10204775 | 354    | 360    | -0.22795148 | 1115692 | -1.47733698 | 1422633  | -1.32744217  | experimental | Tocris | 2373 | T 0901317                 |
| 3268 P11 | X | 596    | 600       | -0.06567406 | 1116   | 1120   | 0.28136442  | 1845471 | 0.03926429  | 2406042  | 0.13688353   | experimental | Tocris | 2184 | SN-6                      |
| 3268 P12 | X | 516    | 520       | -0.06567406 | 475    | 480    | -0.14774426 | 1170149 | -1.36416634 | 1390648  | -1.37058068  | experimental | Tocris | 2374 | GW 405833                 |
| 3268 P13 | X | 395    | 320       | -0.09761471 | 434    | 440    | -0.1738116  | 1470073 | -0.74087474 | 1932273  | -0.56857282  | experimental | Tocris | 2186 | CMPD-1                    |
| 3268 P14 | X | 489    | 490       | -0.08010987 | 380    | 480    | -0.13573381 | 1466580 | -0.7467767  | 2144428  | -0.2373549   | experimental | Tocris | 2382 | EMD 386088 hydrochloride  |
| 3268 P15 | X | 2756   | 2760      | 0.17984837  | 2916   | 2920   | 1.48447285  | 6330319 | -0.40224605 | 2345130  | 0.04618372   | experimental | Tocris | 2190 | SR 27897                  |
| 3268 P16 | X | 469    | 480       | -0.08010987 | 389    | 400    | -0.20455771 | 1493330 | -0.69254286 | 1389537  | -1.37672311  | experimental | Tocris | 2385 | AMN 082 dihydrochloride   |
| 3268 P17 | X | 555    | 560       | -0.07033444 | 474    | 480    | -0.14774426 | 1790511 | -0.07495167 | 1979413  | -0.49837993  | experimental | Tocris | 2191 | S-Trityl-L-cysteine       |
| 3268 P18 | X | 834    | 840       | -0.03862112 | 1115   | 1120   | 0.28069602  | 1894507 | 0.14116919  | 2278064  | -0.05367958  | experimental | Tocris | 2386 | Fenobam                   |
| 3268 P19 | X | 593    | 600       | -0.06601506 | 632    | 640    | -0.04213807 | 1885492 | 0.12243453  | 2278572  | -0.05292315  | experimental | Tocris | 2192 | 4-HQN                     |
| 3268 P20 | X | 794    | 800       | -0.04316783 | 514    | 520    | -0.12100851 | 1940934 | 0.23765216  | 2194521  | -0.17807763  | experimental | Tocris | 2387 | LY 320135                 |
| 3268 P21 | X | 792    | 800       | -0.04339517 | 594    | 600    | -0.06753703 | 1841049 | 0.03007464  | 2034451  | -0.41642669  | experimental | Tocris | 2193 | Carmoxirole hydrochloride |
| 3268 P22 | X | 967    | 960       | -0.17287949 | 833    | 960    | -0.02531999 | 1853879 | 0.05661495  | 1975765  | -0.1071929   | experimental | Tocris | 2190 | MPMQ                      |
| 3268 P23 | E | 1097   | 2200      | -0.00872649 | 597    | 1360   | -0.06553185 | 115994  | -3.55487449 | 111264   | -3.28011021  | empty        |        |      |                           |
| 3268 P24 | P | 377984 | 378640    | 42.8311864  | 261219 | 261760 | 174.132538  | 1611095 | -0.44780774 | 1785927  | -0.78648643  | empty        |        |      |                           |
| 3269 A01 | N | 1078   | 1080      | -0.16672673 | 478    | 480    | -0.12688049 | 1708070 | -0.71193879 | 1558701  | -0.80099304  | empty        |        |      |                           |
| 3269 A02 | E | 155    | 160       | -0.20215828 | 237    | 240    | -0.15290061 | 78199   | -2.35401324 | 120197   | -2.26564312  | empty        |        |      |                           |
| 3269 A03 | X | 553    | 560       | -0.1868801  | 595    | 600    | -0.11424831 | 1143491 | -1.280745   | 1059406  | -1.30936316  | experimental | Tocris | 2392 | JTE 013                   |
| 3269 A04 | E | 515    | 520       | -0.18833883 | 355    | 360    | -0.14016047 | 1917564 | -0.50087623 | 1704961  | -0.65207463  | empty        |        |      |                           |
| 3269 A05 | X | 497    | 480       | -0.19286107 | 557    | 600    | -0.13573381 | 1605731 | -0.81504404 | 1815968  | -0.79499802  | experimental | Tocris | 2394 | SDZ NKT 343               |
| 3269 A06 | E | 277    | 280       | -0.19747502 | 357    | 560    | -0.11835107 | 1833884 | -0.58518278 | 1899663  | -0.45383375  | empty        |        |      |                           |
| 3269 A07 | X | 197    | 200       | -0.20054601 | 196    | 200    | -0.15732727 | 969894  | -1.45564179 | 939992   | -1.43094762  | experimental | Tocris | 2395 | Sertraline hydrochloride  |
| 3269 A08 | E | 556    | 560       | -0.18676494 | 556    | 560    | -0.11845904 | 1876795 | -0.54195048 | 1955727  | -0.39675074  | empty        |        |      |                           |
| 3269 A09 | X | 593    | 600       | -0.18534461 | 435    | 440    | -0.13152308 | 2241561 | -0.17445335 | 1851161  | -0.50321732  | experimental | Tocris | 2396 | Glimepiride               |
| 3269 A10 | X | 764    | 1200      | -0.17878037 | 476    | 480    | -0.12709642 | 2035050 | -0.38251057 | 1905434  | -0.44795786  | empty        |        |      |                           |
| 3269 A11 | X | 148808 | 149480    | 5.50424154  | 494    | 520    | -0.12515301 | 2011077 | -0.40666307 | 2066553  | -0.28391038  | experimental | Tocris | 2397 | Eplerenone                |
| 3269 A12 | E | 229149 | 230160    | 8.58832238  | 386    | 400    | -0.13573381 | 1906426 | -0.51209763 | 1835868  | -0.5189715   | empty        |        |      |                           |
| 3269 A13 | X | 197988 | 199280    | 7.392131    | 357    | 360    | -0.13994453 | 135215  | -0.07029835 | 1972729  | -0.598940761 | experimental | Tocris | 2400 | FK 888                    |
| 3269 A14 | E | 215194 | 216040    | 8.05262643  | 357    | 360    | -0.13994453 | 1954542 | -0.46362136 | 1749772  | -0.60644915  | empty        |        |      |                           |
| 3269 A15 | X | 91224  | 92240     | 3.29374241  | 396    | 400    | -0.13573381 | 2128615 | -0.28824501 | 1961734  | -0.39063456  | experimental | Tocris | 2403 | MRS 3777 hemioxalate      |
| 3269 A16 | E | 133506 | 134360    | 4.91683779  | 437    | 440    | -0.13130715 | 2089183 | -0.32797226 | 1860213  | -0.49400079  | empty        |        |      |                           |
| 3269 A17 | X | 201195 | 202480    | 7.51524144  | 316    | 320    | -0.14437119 | 1949166 | -0.46903762 | 2033618  | -0.317444    | experimental | Tocris | 2404 | Ambroxol hydrochloride    |
| 3269 A18 | E | 308444 | 309040    | 11.63225    | 155    | 480    | -0.16175393 | 1953222 | -0.46495125 | 1974214  | -0.37792772  | empty        |        |      |                           |
| 3269 A19 | X | 2021   | 2920      | -0.13052742 | 111555 | 111560 | 11.865805   | 2102330 | -0.31472682 | 2246093  | -0.10110708  | experimental | Tocris | 2408 | Ro 90-7501                |
| 3269 A20 | E | 787    | 800       | -0.17789746 | 353    | 680    | -0.1403764  | 2180531 | -0.2359403  | 2141921  | -0.2071725   | empty        |        |      |                           |
| 3269 A21 | X | 793    | 800       | -0.17767613 | 874    | 880    | -0.08412543 | 2065260 | -0.35207438 | 2414861  | 0.07072843   | experimental | Tocris | 2759 | B-HT 920                  |
| 3269 A22 | E | 868    | 880       | -0.17478808 | 748    | 760    | -0.09772931 | 2071172 | -0.34611811 | 2120616  | -0.22886474  | empty        |        |      |                           |
| 3269 A23 | E | 749    | 1680      | -0.17935618 | 1439   | 2440   | -0.0231239  | 79132   | -2.35307326 | 110332   | -2.27568742  | empty        |        |      |                           |
| 3269 A24 | P | 318137 | 319000    | 12.0043389  | 342509 | 343280 | 36.8012883  | 1684473 | -0.73571247 | 1863215  | -0.49094423  | empty        |        |      |                           |
| 3269 B01 | N | 475    | 480       | -0.18987432 | 557    | 560    | -0.11835107 | 2024155 | -0.39348715 | 2157770  | -0.19103543  | empty        |        |      |                           |
| 3269 B02 | E | 73     | 80        | -0.20530605 | 114    | 120    | -0.16618059 | 85280   | -2.34687922 | 83291    | -2.30321992  | empty        |        |      |                           |
| 3269 B03 | X | 1546   | 1600      | -0.14876143 | 426    | 1280   | -0.04191021 | 1765184 | -0.6533967  | 1765255  | -0.58966556  | experimental | Tocris | 2550 | SUN-B 8155                |
| 3269 B04 | E | 642    | 680       | -0.18346363 | 514    | 520    | -0.1229367  | 193907  | 0.78502322  | 2629514  | 0.28928296   | empty        |        |      |                           |
| 3269 B05 | X | 146    | 160       | -0.20250377 | 114    | 120    | -0.16618059 | 988368  | -1.43702947 | 941404   | -1.42950995  | experimental | Tocris | 2554 | CD 1530                   |
| 3269 B06 | E | 477    | 480       | -0.18979755 | 356    | 360    | -0.1400525  | 2601665 | 0.18834689  | 2273903  | -0.07279161  | empty        |        |      |                           |
| 3269 B07 | X | 236    | 240       | -0.19904891 | 235    | 240    | -0.15311655 | 1019958 | -1.40520294 | 1022938  | -1.346494    | experimental | Tocris | 2558 | 10-DEBC hydrochloride     |
| 3269 B08 | E | 389    | 440       | -0.19317564 | 595    | 600    | -0.11424831 | 2619415 | 0.20622979  | 2311790  | -0.03421598  | empty        |        |      |                           |
| 3269 B09 | X | 615    | 680       | -0.18450009 | 514    | 620    | -0.1229367  | 1826716 | -0.59240444 | 1787776  | -0.5677544   | experimental | Tocris | 2559 | TPCA-1                    |
| 3269 B10 | E | 54     | 54        | 0.734075    | 493    | 520    | -0.12526098 | 2754691 | 0.34251865  | 2137130  | -0.00761715  | empty        |        |      |                           |
| 3269 B11 | X | 0      | 680       | -0.20092899 | 7944   | 7960   | 0.67920349  | 1914536 | -0.5039269  | 1987431  | -0.36447049  | experimental | Tocris | 2560 | SB 218078                 |
| 3269 B12 | E | 187    | 440       | -0.20810833 | 494    | 520    | -0.12515301 | 2497194 | 0.08309367  | 2322268  | -0.02354753  | empty        |        |      |                           |
| 3269 B13 | X | 0      | 160       | -0.20810833 | 115    | 120    | -0.16607263 | 923185  | -1.50270052 | 923169   | -1.44807639  | experimental | Tocris | 2561 | Calmidazolium chloride    |
| 3269 B14 | E | 0      | 520       | -0.20810833 | 396    | 400    | -0.13573381 | 2771326 | 0.3592782   | 2480629  | 0.13769182   | empty        |        |      |                           |
| 3269 B15 | X | 333    | 640       | -0.19532533 | 436    | 440    |             |         |             |          |              |              |        |      |                           |

|          |   |        |        |             |        |        |             |          |             |         |              |              |        |      |                            |
|----------|---|--------|--------|-------------|--------|--------|-------------|----------|-------------|---------|--------------|--------------|--------|------|----------------------------|
| 3269 C07 | X | 149    | 200    | -0.20238861 | 393    | 400    | -0.13605771 | 1382408  | -1.04003914 | 1476901 | -0.88427982  | experimental | Tocris | 2417 | BIBU 1361 dihydrochloride  |
| 3269 C08 | E | 16017  | 16080  | 0.4067424   | 430    | 480    | -0.13206292 | 2332742  | -0.08258964 | 2395121 | 0.05062964   | empty        |        |      |                            |
| 3269 C09 | X | 20539  | 20640  | 0.58033016  | 634    | 640    | -0.11003759 | 2055688  | -0.36171805 | 1911178 | -0.444210946 | experimental | Tocris | 2418 | LY 303511                  |
| 3269 C10 | E | 17760  | 17880  | 0.47361552  | 424    | 440    | -0.12711072 | 2412100  | -0.00263746 | 2165073 | -0.18335969  | empty        |        |      | Scriptaid                  |
| 3269 C11 | X | 97889  | 99880  | 0.55153962  | 3893   | 3920   | -0.24272789 | 1733990  | -0.56822472 | 1503033 | -0.85767285  | experimental | Tocris | 2421 |                            |
| 3269 C12 | E | 11921  | 12000  | 0.24950768  | 425    | 440    | -0.13260276 | 2545537  | 0.13179864  | 2384139 | 0.03944803   | empty        |        |      |                            |
| 3269 C13 | X | 6442   | 6480   | 0.0391832   | 396    | 400    | -0.13573381 | 2998136  | 0.58778641  | 2666358 | 0.32679661   | experimental | Tocris | 2429 | Fexofenadine hydrochloride |
| 3269 C14 | E | 461    | 520    | -0.19041174 | 356    | 360    | -0.1400525  | 2491192  | 0.07704673  | 2283379 | -0.06314337  | empty        |        |      |                            |
| 3269 C15 | X | 12746  | 12800  | 0.28117727  | 190    | 200    | -0.15797508 | 1672311  | -0.74796553 | 1372353 | -0.99072808  | experimental | Tocris | 2435 | CCT 018159                 |
| 3269 C16 | E | 15792  | 15920  | 0.39810524  | 596    | 600    | -0.11414035 | 2582615  | 0.16915425  | 2454777 | 0.11136994   | empty        |        |      |                            |
| 3269 C17 | X | 20261  | 20360  | 0.56965846  | 442    | 200    | -0.16315751 | 2862007  | 0.45063816  | 2343935 | -0.00148671  | experimental | Tocris | 2436 | AC 55649                   |
| 3269 C18 | X | 14854  | 14920  | 0.36209788  | 17914  | 18120  | 1.75542168  | 2881024  | 0.46979755  | 255507  | 0.20882668   | empty        |        |      |                            |
| 3269 C19 | X | 459    | 520    | -0.19048852 | 503    | 560    | -0.12418131 | 3198578  | 0.7897292   | 2728505 | 0.39007318   | experimental | Tocris | 2438 | TMPh hydrochloride         |
| 3269 C20 | E | 912    | 920    | -0.17309903 | 498    | 560    | -0.12472114 | 2819876  | 0.40819171  | 2825842 | 0.48917937   | empty        |        |      |                            |
| 3269 C21 | X | 584    | 600    | -0.1856901  | 5312   | 5320   | 0.39503351  | 946209   | -1.47950413 | 982542  | -1.38762423  | experimental | Tocris | 2440 | NNC 26-9100                |
| 3269 C22 | E | 700    | 720    | -0.18123716 | 736    | 760    | -0.09902492 | 2590040  | 0.17663485  | 2756444 | 0.41852      | empty        |        |      |                            |
| 3269 C23 | E | 751    | 1640   | -0.1792794  | 699    | 1280   | -0.10301971 | 86900    | -2.34524709 | 111671  | -2.27432408  | empty        |        |      |                            |
| 3269 C24 | P | 301533 | 303160 | 11.3669548  | 195297 | 196680 | 20.9072039  | 2469769  | 0.05546333  | 2840870 | 0.50448052   | empty        |        |      |                            |
| 3269 D01 | N | 502    | 600    | -0.18883786 | 797    | 800    | -0.09243892 | 2544689  | 0.13094429  | 2617007 | 0.27654861   | empty        |        |      |                            |
| 3269 D02 | E | 157    | 160    | -0.20208151 | 156    | 160    | -0.16164597 | 86638    | -2.34551106 | 85330   | -2.30114386  | empty        |        |      |                            |
| 3269 D03 | X | 106    | 160    | -0.20403927 | 146    | 160    | -0.16272564 | 1581208  | -0.83975065 | 1420603 | -0.94160109  | experimental | Tocris | 2574 | PSB 06126                  |
| 3269 D04 | E | 405    | 440    | -0.19256144 | 615    | 520    | -0.1228857  | 3316654  | 0.90868928  | 2914062 | 0.57900285   | empty        |        |      |                            |
| 3269 D05 | X | 787    | 800    | -0.17789746 | 535    | 640    | -0.10992962 | 2525002  | 0.11110988  | 2398819 | 0.05439485   | experimental | Tocris | 2577 | Cetirizine dihydrochloride |
| 3269 D06 | E | 472    | 480    | -0.18998948 | 350    | 360    | -0.14059234 | 2893209  | 0.48207379  | 2974434 | 0.64047216   | empty        |        |      |                            |
| 3269 D07 | X | 874    | 880    | -0.17455775 | 1031   | 1080   | -0.06728253 | 2503044  | 0.08898747  | 2526383 | 0.18427744   | experimental | Tocris | 2578 | Benazepril hydrochloride   |
| 3269 D08 | E | 440    | 450    | -0.1947495  | 15713  | 15720  | 1.51800156  | 3001061  | 0.59073331  | 3245448 | 0.89668608   | empty        |        |      |                            |
| 3269 D09 | X | 295    | 360    | -0.19678405 | 428    | 480    | -0.13227886 | 819782   | -0.59890336 | 1830786 | -0.52396265  | experimental | Tocris | 2579 | Zamifenacin fumarate       |
| 3269 D10 | E | 424    | 480    | -0.19183208 | 513    | 520    | -0.12310163 | 2884625  | 0.47342551  | 3035324 | 0.70246889   | empty        |        |      |                            |
| 3269 D11 | X | 657    | 720    | -0.18288782 | 504    | 520    | -0.12407334 | 2114820  | -0.3021433  | 1931676 | -0.42123889  | experimental | Tocris | 2580 | Tenidap                    |
| 3269 D12 | E | 480    | 520    | -0.18968238 | 235    | 240    | -0.15311655 | 3128228  | 0.71885246  | 2642957 | 0.30297027   | empty        |        |      |                            |
| 3269 D13 | X | 536    | 560    | -0.18753269 | 396    | 400    | -0.13573381 | 2032740  | -0.38483787 | 1622984 | -0.73554164  | experimental | Tocris | 2581 | PAC 1                      |
| 3269 D14 | E | 591    | 600    | -0.18542138 | 430    | 440    | -0.13206292 | 3319354  | 0.91140949  | 3071761 | 0.73956817   | empty        |        |      |                            |
| 3269 D15 | X | 1409   | 1480   | -0.1540205  | 2195   | 2200   | 0.05849939  | 2631640  | 0.21854632  | 2337871 | -0.00776093  | experimental | Tocris | 2582 | Lansoprazole               |
| 3269 D16 | X | 10480  | 10480  | 0.19188822  | 973    | 10480  | 0.19188822  | 2915085  | 0.5071396   | 3727404 | 0.0399112    | experimental | Tocris | 2583 | Omeprazole                 |
| 3269 D17 | X | 2504   | 2600   | -0.11198632 | 431    | 640    | -0.13195495 | 2434833  | 0.02026575  | 2629021 | 0.28878097   | empty        |        |      |                            |
| 3269 D18 | E | 1415   | 1480   | -0.15379018 | 70422  | 70480  | 7.42478541  | 3122316  | 0.17289619  | 3257355 | 0.9285355    | empty        |        |      |                            |
| 3269 D19 | X | 4510   | 4520   | -0.03498123 | 389    | 640    | -0.13648958 | 2068264  | -0.34904788 | 1887578 | -0.46613841  | experimental | Tocris | 2586 | CFM 1571 hydrochloride     |
| 3269 D20 | E | 733    | 760    | -0.17997038 | 14992  | 15000  | 1.44015712  | 2959668  | 0.54903039  | 3612692 | 1.29033106   | empty        |        |      |                            |
| 3269 D21 | X | 3105   | 3120   | -0.0889155  | 857    | 920    | -0.08596088 | 2942634  | 0.53186885  | 2944625 | 0.61012136   | experimental | Tocris | 2591 | TCS 359                    |
| 3269 D22 | E | 3022   | 3040   | -0.09210165 | 727    | 760    | -0.09999663 | 3067408  | 0.65757708  | 4031280 | 1.71652727   | empty        |        |      |                            |
| 3269 D23 | X | 1550   | 1560   | -0.17820456 | 973    | 1350   | -0.17820456 | 87501    | -7.34641359 | 1863629 | -7.34641359  | empty        |        |      |                            |
| 3269 D24 | P | 262371 | 263920 | 9.86362806  | 211392 | 212600 | 22.6449378  | 2454022  | 0.03959843  | 2476434 | 0.133942057  | empty        |        |      |                            |
| 3269 E01 | N | 33219  | 33240  | 1.06708219  | 515    | 520    | -0.1228857  | 2119503  | -0.29742524 | 2349610 | 0.00429143   | empty        |        |      |                            |
| 3269 E02 | E | 61     | 160    | -0.2057667  | 197    | 200    | -0.15721931 | 87111    | -2.34503451 | 133941  | -2.25164931  | empty        |        |      |                            |
| 3269 E03 | X | 717    | 720    | -0.18058457 | 556    | 600    | -0.1400525  | 3241760  | 0.83323452  | 2383627 | 0.03892672   | experimental | Tocris | 2441 | JNJ 10191584 maleate       |
| 3269 E04 | E | 395    | 400    | -0.19294531 | 396    | 600    | -0.11414035 | 2779420  | 0.3674328   | 2216431 | -0.13130821  | empty        |        |      |                            |
| 3269 E05 | X | 274    | 280    | -0.19759019 | 272    | 280    | -0.14912176 | 1375533  | -1.04696562 | 1387850 | -0.9749494   | experimental | Tocris | 2442 | CGP 53353                  |
| 3269 E06 | X | 434    | 440    | -0.19144882 | 874    | 880    | -0.08412543 | 2848504  | 0.43703406  | 3543398 | 0.81861629   | empty        |        |      |                            |
| 3269 E07 | X | 873    | 880    | -0.17459614 | 911    | 920    | -0.08013064 | 2632586  | 2.93064792  | 52077   | 2.93064792   | experimental | Tocris | 2443 | RITA                       |
| 3269 E08 | E | 592    | 600    | -0.185383   | 427    | 480    | -0.13238682 | 2728927  | 0.31656174  | 2793868 | 0.45662421   | empty        |        |      |                            |
| 3269 E09 | X | 1036   | 1040   | -0.168339   | 1074   | 1080   | -0.06253197 | 3028896  | 0.61877672  | 2452724 | 0.10927962   | experimental | Tocris | 2447 | YM 298198, Desmethyl-      |
| 3269 E10 | E | 352    | 360    | -0.19459597 | 832    | 840    | -0.08866006 | 2627817  | 0.2146947   | 2689656 | 0.35051807   | empty        |        |      |                            |
| 3269 E11 | X | 955    | 960    | -0.17144838 | 674    | 680    | -0.1057189  | 2501564  | 0.08749639  | 2825648 | -0.06083313  | experimental | Tocris | 2448 | YM 298198 hydrochloride    |
| 3269 E12 | E | 553    | 560    | -0.1868801  | 395    | 400    | -0.13584178 | 2693797  | 0.28116871  | 2453214 | 0.10977853   | empty        |        |      |                            |
| 3269 E13 | X | 555    | 560    | -0.18680333 | 396    | 400    | -0.13573381 | 2422776  | 0.00811848  | 2204752 | -0.14319949  | experimental | Tocris | 2451 | LY 344864 hydrochloride    |
| 3269 E14 | E | 393    | 400    | -0.19302209 | 395    | 400    | -0.13584178 | 2530917  | 0.11708917  | 2772404 | 0.43477009   | empty        |        |      |                            |
| 3269 E15 | X | 671    | 680    | -0.18235039 | 590    | 600    | -0.11478815 | 2647382  | 0.23440619  | 2085049 | -0.2650782   | experimental | Tocris | 2452 | LY 2183240                 |
| 3269 E16 | E | 684    | 720    | -0.18185136 | 632    | 640    | -0.11025352 | 2961895  | 0.55127406  | 2519807 | 0.17758191   | empty        |        |      |                            |
| 3269 E17 | X | 787    | 800    | -0.17789746 | 753    | 760    | -0.09718948 | 3376427  | 0.96809982  | 2724247 | 0.38573779   | experimental | Tocris | 2456 | Co 101244 hydrochloride    |
| 3269 E18 | E | 480    | 480    | -0.19006626 | 391    | 600    | -0.13627365 | 3368369  | 0.96079148  | 2916377 | 0.58135992   | empty        |        |      |                            |
| 3269 E19 | X | 659    | 680    | -0.18281104 | 509    | 520    | -0.1235335  | 2605076  | 0.19178343  | 2458699 | 0.11536322   | experimental | Tocris | 2457 | Arcyriaflavin A            |
| 3269 E20 | E | 672    | 680    | -0.18231201 | 671    | 720    | -0.1060428  | 3101264  | 0.69168657  | 3140832 | 0.80989459   | empty        |        |      |                            |
| 3269 E21 | X | 688    | 720    | -0.18169781 | 409    | 840    | -0.09144331 | 1684452  | -0.73573363 | 1990295 | -0.36155443  | experimental | Tocris | 2458 | ZM 447439                  |
| 3269 E22 | E | 855    | 880    | -0.17528711 | 8228   | 8240   | 0.7098662   | 3055580  | 0.64566052  | 2882544 | 0.54691198   | empty        |        |      |                            |
| 3269 E23 | E | 563    | 1240   | -0.18649623 | 1173   | 1840   | -0.05184321 | 84406    | -2.34775977 | 111026  | -2.27498081  | empty        |        |      |                            |
| 3269 E24 | P | 229043 | 230320 | 8.58425332  | 217883 | 219120 | 23.3457537  | 2643984  | 0.23098274  | 2772762 | 0.43513459   | empty        |        |      |                            |
| 3269 F01 | N | 6542   | 6640   | 0.04302194  | 712    | 760    | -0.10161614 | 2522824  | 0.10891557  | 2750275 | 0.41223887   | empty        |        |      |                            |
| 3269 F02 | E | 139    | 160    | -0.20277248 | 156    | 160    | -0.16164597 | 84004    | -2.34816478 | 82571   | -2.303953    | empty        |        |      |                            |
| 3269 F03 | X | 315    | 320    | -0.1960163  | 396    | 400    | -0.13573381 | 2392860  | -0.02202151 | 2286196 | -0.06027517  | experimental | Tocris | 2592 | TCB2                       |
| 3269 F04 | E | 355    | 360    | -0.19448081 | 354    | 360    | -0.14026584 | 28980074 | 0.56959818  | 3542271 | 0.58681578   | empty        |        |      |                            |
| 3269 F05 | X | 306    | 400    | -0.19290692 | 595    | 600    | -0.11424831 | 2633834  | 0.23068575  | 2596481 | 0.25564953   | experimental | Tocris | 2596 | Mexiletine hydrochloride   |
| 3269 F06 | E | 395    | 400    | -0.19294531 | 313    | 520    | -0.12310163 | 2936524  | 0.5257131   | 3440652 | 1.11516408   | empty        |        |      |                            |
| 3269 F07 | X | 632    | 640    | -0.1838475  | 512    | 520    | -0.1232096  | 2166180  | -0.25039875 | 2427460 | 0.08355643   | experimental | Tocris | 2600 | Clofarabine                |
| 3269 F08 | E | 595    | 600    | -0.18526783 | 555    | 560    | -0.11856701 | 3231168  | 0.82256321  | 3102524 | 0.77089031   | empty        |        |      |                            |
| 3269 F09 | X | 192    | 200    | -0.20073795 | 191    | 200    | -0.15786711 | 1101050  | -1.32350378 | 1150119 | -1.21700138  | experimental | Tocris | 2605 | PD 198306                  |
| 3269 F10 | E | 436    | 440    | -0.19137143 | 635    |        |             |          |             |         |              |              |        |      |                            |



|          |   |        |        |             |        |        |             |         |             |         |             |              |        |      |                            |
|----------|---|--------|--------|-------------|--------|--------|-------------|---------|-------------|---------|-------------|--------------|--------|------|----------------------------|
| 3269 J19 | X | 474    | 480    | -0.18991271 | 1818   | 1840   | 0.01779571  | 2852356 | 0.4409149   | 2049060 | -0.30172133 | experimental | Tocris | 2655 | Naproxen sodium            |
| 3269 J20 | E | 632    | 640    | -0.1838475  | 5091   | 5120   | 0.37117274  | 3080895 | 0.67116506  | 3348547 | 1.021385    | empty        |        |      |                            |
| 3269 J21 | X | 952    | 960    | -0.17156354 | 1711   | 1840   | 0.00624321  | 2461719 | 0.04735306  | 2349875 | 0.00456125  | experimental | Tocris | 2657 | JX 401                     |
| 3269 J22 | E | 908    | 920    | -0.17325258 | 866    | 880    | -0.06498917 | 3332624 | 0.92477885  | 3037717 | 0.70429468  | empty        |        |      |                            |
| 3269 J23 | E | 464    | 1280   | -0.19029658 | 811    | 1400   | -0.09092737 | 83579   | -2.34859296 | 104579  | -2.28154499 | empty        |        |      |                            |
| 3269 J24 | P | 275666 | 277480 | 10.37782721 | 197708 | 199160 | 21.1675131  | 2602092 | 0.18877708  | 2653929 | 0.31414147  | empty        |        |      |                            |
| 3269 K01 | N | 128073 | 128080 | 4.70827913  | 357    | 360    | -0.13994453 | 2553101 | 0.13941927  | 2445408 | 0.10183065  | empty        |        |      |                            |
| 3269 K02 | E | 0      | 200    | -0.20810833 | 117    | 120    | -0.16585669 | 84426   | -2.34773962 | 131560  | -2.25407358 | empty        |        |      |                            |
| 3269 K03 | X | 24035  | 24040  | 0.71453245  | 315    | 320    | -0.14447916 | 2955369 | 0.5446992   | 2241186 | -0.10610327 | experimental | Tocris | 2491 | Xaliproden hydrochloride   |
| 3269 K04 | E | 365    | 440    | -0.19409693 | 994    | 1000   | -0.07116936 | 3044348 | 0.63434442  | 2583168 | 0.24209456  | empty        |        |      |                            |
| 3269 K05 | X | 632    | 640    | -0.1838475  | 672    | 680    | -0.10593483 | 3587254 | 1.18131536  | 2506145 | 0.1636716   | experimental | Tocris | 2492 | MNITMT                     |
| 3269 K06 | E | 713    | 720    | -0.18093842 | 753    | 760    | -0.09718948 | 2553053 | 0.14541583  | 3076830 | 0.74334967  | empty        |        |      |                            |
| 3269 K07 | X | 714    | 720    | -0.18069974 | 553    | 560    | -0.11878294 | 2850880 | 0.43942785  | 2956764 | 0.62248099  | experimental | Tocris | 2493 | VUF 5681 dihydrobromide    |
| 3269 K08 | E | 834    | 840    | -0.17609325 | 633    | 640    | -0.11014556 | 3014089 | 0.60385886  | 2907655 | 0.57247939  | empty        |        |      |                            |
| 3269 K09 | X | 514    | 520    | -0.18837721 | 794    | 800    | -0.09276282 | 3230414 | 0.82180356  | 2963931 | 0.62977826  | experimental | Tocris | 2494 | VUF 8430 dihydrobromide    |
| 3269 K10 | E | 514    | 520    | -0.18837721 | 713    | 720    | -0.10150817 | 2972086 | 0.56154137  | 2803163 | 0.46608816  | empty        |        |      |                            |
| 3269 K11 | X | 471    | 480    | -0.19002787 | 431    | 440    | -0.13195495 | 2894431 | 0.48330493  | 2655429 | 0.31566896  | experimental | Tocris | 2495 | Melperone hydrochloride    |
| 3269 K12 | E | 474    | 480    | -0.18991271 | 594    | 600    | -0.11435628 | 2943973 | 0.53321787  | 2898516 | 0.56317428  | empty        |        |      |                            |
| 3269 K13 | X | 635    | 640    | -0.18373234 | 475    | 480    | -0.12720439 | 2826673 | 0.41503961  | 2766830 | 0.42809478  | experimental | Tocris | 2496 | DR 2313                    |
| 3269 K14 | E | 353    | 360    | -0.19455758 | 353    | 360    | -0.1403764  | 3349400 | 0.94168046  | 2618822 | 0.2783966   | empty        |        |      |                            |
| 3269 K15 | X | 593    | 600    | -0.18534461 | 634    | 640    | -0.11003759 | 3309744 | 0.90172754  | 2813090 | 0.47619559  | experimental | Tocris | 2498 | PNU 120596                 |
| 3269 K16 | E | 473    | 480    | -0.1899511  | 593    | 600    | -0.11446425 | 3129692 | 0.72032742  | 2687990 | 0.34882179  | empty        |        |      |                            |
| 3269 K17 | X | 394    | 400    | -0.1929837  | 513    | 520    | -0.12310163 | 3334908 | 0.92707995  | 4480822 | 2.17424009  | experimental | Tocris | 2499 | ZM 306416 hydrochloride    |
| 3269 K18 | E | 475    | 480    | -0.18987432 | 792    | 800    | -0.09297875 | 3159646 | 0.74050557  | 3640533 | 1.3186781   | empty        |        |      |                            |
| 3269 K19 | X | 552    | 560    | -0.18691849 | 613    | 640    | -0.1123049  | 2653478 | 0.24504783  | 2999884 | 0.66638474  | experimental | Tocris | 2500 | BAY 59-3074                |
| 3269 K20 | E | 713    | 720    | -0.18074912 | 5618   | 5680   | -0.14497722 | 3798915 | 0.38107377  | 4778626 | 0.64398455  | empty        |        |      |                            |
| 3269 K21 | X | 681    | 680    | -0.18235039 | 734    | 760    | -0.09924086 | 2974310 | 0.56378202  | 3906342 | 1.58931841  | experimental | Tocris | 2501 | BAY 36-7620                |
| 3269 K22 | E | 1029   | 1040   | -0.16860771 | 787    | 800    | -0.09351859 | 2964176 | 0.55357214  | 3301682 | 0.97366819  | empty        |        |      |                            |
| 3269 K23 | E | 814    | 1640   | -0.176861   | 909    | 1760   | -0.08034658 | 81611   | -2.35057569 | 114603  | -2.27133879 | empty        |        |      |                            |
| 3269 K24 | P | 280065 | 281600 | 10.5428544  | 288648 | 290040 | 30.9860607  | 2862270 | 0.45090313  | 2828666 | 0.4920547   | empty        |        |      |                            |
| 3269 L01 | N | 267    | 640    | -0.1978589  | 556    | 560    | -0.11845904 | 2490993 | 0.07684624  | 2751912 | 0.41390563  | empty        |        |      |                            |
| 3269 L02 | E | 156    | 160    | -0.2021199  | 157    | 160    | -0.161538   | 80152   | -2.35204562 | 80940   | -2.30561365 | empty        |        |      |                            |
| 3269 L03 | X | 447    | 520    | -0.19094917 | 316    | 320    | -0.14437119 | 1563070 | -0.85802446 | 1705664 | -0.65135885 | experimental | Tocris | 2661 | UCL 2077                   |
| 3269 L04 | E | 552    | 560    | -0.18691849 | 475    | 480    | -0.14878294 | 3159646 | 0.74050557  | 3640533 | 1.3186781   | empty        |        |      |                            |
| 3269 L05 | X | 1033   | 1040   | -0.16845416 | 632    | 440    | -0.13184699 | 2815309 | 0.40359052  | 2305332 | -0.04079136 | experimental | Tocris | 2662 | PHTPP                      |
| 3269 L06 | E | 472    | 480    | -0.18998948 | 794    | 800    | -0.09276282 | 2857711 | 0.44631     | 3127373 | 0.79619096  | empty        |        |      |                            |
| 3269 L07 | X | 312    | 320    | -0.19613146 | 512    | 520    | -0.1232096  | 2122651 | -0.29425367 | 2076420 | -0.27386404 | experimental | Tocris | 2664 | Cabergoline                |
| 3269 L08 | E | 434    | 440    | -0.1914482  | 355    | 360    | -0.14016047 | 3306176 | 0.89813282  | 3347399 | 1.02021613  | empty        |        |      |                            |
| 3269 L09 | X | 115    | 120    | -0.20369378 | 153    | 160    | -0.16196987 | 1312834 | -1.11013407 | 1010515 | -1.3591428  | experimental | Tocris | 2665 | BMS 191011                 |
| 3269 L10 | E | 475    | 480    | -0.18987432 | 554    | 560    | -0.11867497 | 3415037 | 1.00780891  | 2663592 | 0.32398033  | empty        |        |      |                            |
| 3269 L11 | X | 554    | 560    | -0.18687432 | 792    | 800    | -0.11457722 | 1649063 | -0.7713876  | 1578626 | 0.64795853  | experimental | Tocris | 2764 | GP 1a                      |
| 3269 L12 | E | 474    | 480    | -0.18991271 | 795    | 800    | -0.13163105 | 3659763 | 1.25436726  | 2883324 | 0.54770616  | empty        |        |      |                            |
| 3269 L13 | X | 393    | 400    | -0.19302209 | 395    | 400    | -0.13584178 | 3353952 | 0.94626654  | 2523153 | 0.18098873  | experimental | Tocris | 2668 | Artemisinin                |
| 3269 L14 | E | 794    | 800    | -0.17762875 | 434    | 440    | -0.13163105 | 3559155 | 1.15300597  | 3228703 | 0.89936272  | empty        |        |      |                            |
| 3269 L15 | X | 752    | 760    | -0.17924102 | 674    | 680    | -0.1057189  | 3147401 | 0.73816902  | 2457999 | 0.1146505   | experimental | Tocris | 2669 | TC 1                       |
| 3269 L16 | E | 832    | 840    | -0.17617002 | 593    | 600    | -0.11446425 | 3287717 | 0.87953561  | 2638843 | 0.2987815   | empty        |        |      |                            |
| 3269 L17 | X | 794    | 800    | -0.17762875 | 594    | 600    | -0.11435628 | 2734763 | 0.32244144  | 2850469 | 0.51425399  | experimental | Tocris | 2671 | Budesonide                 |
| 3269 L18 | E | 472    | 480    | -0.18998948 | 592    | 600    | -0.11457722 | 3224573 | 0.81591883  | 4727623 | 0.94769553  | empty        |        |      |                            |
| 3269 L19 | X | 914    | 920    | -0.17302226 | 673    | 680    | -0.10582686 | 672367  | 0.31096011  | 2820950 | 0.57546774  | experimental | Tocris | 2673 | Acarbose                   |
| 3269 L20 | E | 632    | 640    | -0.1838475  | 658    | 680    | -0.10744637 | 3146407 | 0.73716757  | 3591447 | 1.26869992  | empty        |        |      |                            |
| 3269 L21 | X | 432    | 440    | -0.19152498 | 352    | 360    | -0.14048437 | 1061410 | -1.36344058 | 1071934 | -1.29660746 | experimental | Tocris | 2676 | Y 134                      |
| 3269 L22 | E | 670    | 680    | -0.18238878 | 909    | 920    | -0.08034658 | 3076907 | 0.6671472   | 3250232 | 0.92128303  | empty        |        |      |                            |
| 3269 L23 | E | 703    | 1440   | -0.181122   | 938    | 1760   | -0.07721552 | 85019   | -2.34714218 | 101448  | -2.2847329  | empty        |        |      |                            |
| 3269 L24 | P | 249449 | 251000 | 9.36758628  | 278251 | 279760 | 29.8635246  | 2277047 | -0.13870165 | 2692833 | 0.35375281  | empty        |        |      |                            |
| 3269 M01 | N | 436    | 440    | -0.19137143 | 716    | 720    | -0.10118427 | 2468170 | 0.05385236  | 2334265 | -0.01133248 | empty        |        |      |                            |
| 3269 M02 | E | 116    | 120    | -0.20365339 | 156    | 160    | -0.16164597 | 84014   | -2.3481547  | 129033  | -2.25664651 | empty        |        |      |                            |
| 3269 M03 | X | 513    | 520    | -0.1884156  | 354    | 360    | -0.14026844 | 4109348 | 1.70731847  | 2458786 | 0.1154518   | experimental | Tocris | 2503 | (-)-Bicuculline methiodide |
| 3269 M04 | E | 633    | 640    | -0.18380911 | 594    | 600    | -0.11435628 | 3099520 | 0.68992951  | 2699374 | 0.3604127   | empty        |        |      |                            |
| 3269 M05 | X | 832    | 840    | -0.17617002 | 594    | 600    | -0.11435628 | 3308017 | 0.89998761  | 3461090 | 1.13597356  | experimental | Tocris | 2504 | Irsogladine maleate        |
| 3269 M06 | E | 551    | 560    | -0.18695688 | 392    | 400    | -0.13616568 | 2816379 | 0.40466853  | 2957181 | 0.62290557  | empty        |        |      |                            |
| 3269 M07 | X | 1194   | 1200   | -0.16227379 | 875    | 880    | -0.08401747 | 2667093 | 0.25426477  | 2981461 | 0.64762688  | experimental | Tocris | 2506 | SSR 69071                  |
| 3269 M08 | E | 713    | 720    | -0.18073812 | 512    | 520    | -0.1232096  | 2778515 | 0.36652103  | 3382632 | 1.05608952  | empty        |        |      |                            |
| 3269 M09 | X | 352    | 360    | -0.19459597 | 752    | 760    | -0.09728745 | 3060883 | 0.65100322  | 3813243 | 1.49452726  | experimental | Tocris | 2507 | J 104129 fumarate          |
| 3269 M10 | E | 435    | 440    | -0.19140982 | 474    | 480    | -0.12731236 | 3200418 | 0.79158297  | 3095878 | 0.76412351  | empty        |        |      |                            |
| 3269 M11 | X | 475    | 480    | -0.18987432 | 314    | 320    | -0.14458713 | 2853052 | 0.44161611  | 2920163 | 0.58521474  | experimental | Tocris | 2508 | Trap 101                   |
| 3269 M12 | E | 514    | 520    | -0.18837721 | 355    | 360    | -0.14016047 | 2767878 | 0.35580439  | 2933413 | 0.59870557  | empty        |        |      |                            |
| 3269 M13 | X | 515    | 520    | -0.18833883 | 355    | 360    | -0.14016047 | 2948556 | 0.53783519  | 3209405 | 0.87971397  | experimental | Tocris | 2510 | Taliniflumate              |
| 3269 M14 | E | 473    | 480    | -0.1899511  | 475    | 480    | -0.12720439 | 2712268 | 0.29977801  | 2959103 | 0.62486251  | empty        |        |      |                            |
| 3269 M15 | X | 512    | 520    | -0.18845399 | 553    | 560    | -0.11878294 | 2787012 | 0.37508165  | 3209661 | 0.67997462  | experimental | Tocris | 2513 | Acyclovir                  |
| 3269 M16 | E | 493    | 500    | -0.18534461 | 434    | 440    | -0.11652195 | 2781917 | 0.36594885  | 4708132 | 0.36931971  | empty        |        |      |                            |
| 3269 M17 | X | 352    | 360    | -0.19459597 | 394    | 400    | -0.13594974 | 2924726 | -0.39291187 | 2014071 | -0.33734628 | experimental | Tocris | 2514 | L 161982                   |
| 3269 M18 | E | 515    | 520    | -0.18833883 | 674    | 680    | -0.1057189  | 3129661 | 0.72029619  | 3580609 | 1.25766493  | empty        |        |      |                            |
| 3269 M19 | X | 513    | 520    | -0.1884156  | 513    | 520    | -0.12310163 | 1985422 | -0.43251015 | 2438850 | 0.09515345  | experimental | Tocris | 2517 | RS 504393                  |
| 3269 M20 | E | 753    | 760    | -0.17920263 | 834    | 840    | -0.08844413 | 2948787 | 0.53806792  | 3372684 | 1.04596071  | empty        |        |      |                            |
| 3269 M21 | X | 711    | 720    | -0.1808149  | 551    | 560    | -0.11899888 | 1640911 | -0.77960064 | 1905896 | -0.44748746 | experimental | Tocris | 2519 | T 98475                    |
| 3269 M22 | E | 669    | 680    | -0.18242717 | 1029   | 1040   | -0.0673905  | 3114592 | 0.70511436  | 3276698 | 0.94823008  | empty        |        |      |                            |
|          |   |        |        |             |        |        |             |         |             |         |             |              |        |      |                            |



|          |   |        |        |             |        |        |             |          |             |          |             |              |        |      |                                 |
|----------|---|--------|--------|-------------|--------|--------|-------------|----------|-------------|----------|-------------|--------------|--------|------|---------------------------------|
| 3269 N13 | X | 475    | 480    | -0.18987432 | 554    | 560    | -0.11867497 | 2789726  | 0.37781597  | 2931992  | 0.59725874  | experimental | Tocris | 2687 | Pentylentetrazole               |
| 3269 N14 | X | 473    | 480    | -0.1899511  | 473    | 480    | -0.12742033 | 2699502  | 0.28691643  | 3011139  | 0.67784431  | empty        |        |      |                                 |
| 3269 N15 | X | 755    | 760    | -0.17912585 | 755    | 760    | -0.09697354 | 10637548 | 8.28439753  | 10747332 | 8.55464945  | experimental | Tocris | 2688 | CPT 11                          |
| 3269 N16 | E | 633    | 640    | -0.18380911 | 593    | 640    | -0.18380911 | 3604059  | 1.19824618  | 3192760  | 0.06683913  | empty        |        |      |                                 |
| 3269 N17 | X | 673    | 680    | -0.18227362 | 473    | 480    | -0.12742033 | 3166897  | 0.75781099  | 2765029  | 0.42726104  | experimental | Tocris | 2691 | Moexipril hydrochloride         |
| 3269 N18 | E | 433    | 440    | -0.19148659 | 674    | 680    | -0.1057189  | 3273971  | 0.86586669  | 3117692  | 0.786334    | empty        |        |      |                                 |
| 3269 N19 | X | 314    | 320    | -0.19605469 | 273    | 280    | -0.14901379 | 994708   | -1.430642   | 942672   | -1.42821891 | experimental | Tocris | 2693 | PHA 665752                      |
| 3269 N20 | E | 552    | 560    | -0.18691849 | 432    | 440    | -0.13184699 | 3361630  | 0.95400203  | 2958759  | 0.62451225  | empty        |        |      |                                 |
| 3269 N21 | X | 1072   | 1080   | -0.16695705 | 712    | 720    | -0.10161614 | 1755380  | -0.66427456 | 1500021  | -0.8607396  | experimental | Tocris | 2694 | PD 407824                       |
| 3269 N22 | E | 827    | 840    | -0.17636196 | 587    | 600    | -0.11511205 | 2752560  | 0.34037169  | 3121730  | 0.7904454   | empty        |        |      |                                 |
| 3269 N23 | E | 786    | 1680   | -0.17793594 | 974    | 1720   | -0.0733287  | 83150    | -2.34902517 | 96327    | -2.28994698 | empty        |        |      |                                 |
| 3269 N24 | P | 303714 | 305120 | 11.4507545  | 252353 | 253760 | -0.03683575 | 2715609  | 0.30314403  | 2752240  | 0.41423959  | empty        |        |      |                                 |
| 3269 O01 | N | 476    | 480    | -0.18983593 | 835    | 840    | -0.08833616 | 2161263  | -0.25535257 | 2288727  | -0.05769817 | empty        |        |      |                                 |
| 3269 O02 | E | 194    | 200    | -0.20066118 | 114    | 120    | -0.16618059 | 82539    | -2.34964075 | 123395   | -2.26238699 | empty        |        |      |                                 |
| 3269 O03 | X | 1114   | 1120   | -0.16534478 | 875    | 880    | -0.08401747 | 2932083  | 0.52123885  | 2592102  | 0.25119094  | experimental | Tocris | 2520 | PD 166793                       |
| 3269 O04 | E | 513    | 520    | -0.1884156  | 513    | 520    | -0.12310163 | 2439387  | 0.02485385  | 2321093  | -0.02474389 | empty        |        |      |                                 |
| 3269 O05 | X | 274    | 280    | -0.19759019 | 194    | 200    | -0.15754321 | 1593320  | -0.82754797 | 1486041  | -0.8749737  | experimental | Tocris | 2521 | NSC 3852                        |
| 3269 O06 | E | 352    | 360    | -0.19459597 | 512    | 520    | -0.1232096  | 2506413  | 0.0923817   | 2506046  | 0.1635708   | empty        |        |      |                                 |
| 3269 O07 | X | 1594   | 1600   | -0.14691894 | 1312   | 1320   | -0.03683575 | 2715609  | 0.30314403  | 2752240  | 0.41423959  | experimental | Tocris | 2524 | A 205804                        |
| 3269 O08 | E | 711    | 720    | -0.1808149  | 1272   | 1280   | -0.04115444 | 2604274  | 0.19097542  | 2674853  | 0.33544601  | empty        |        |      |                                 |
| 3269 O09 | X | 549    | 560    | -0.18703365 | 468    | 480    | -0.12796016 | 2774888  | 0.36286687  | 2647414  | 0.30750828  | experimental | Tocris | 2531 | Ganaxalone                      |
| 3269 O10 | E | 714    | 720    | -0.18069974 | 434    | 440    | -0.13163105 | 2489054  | 0.07489273  | 2477590  | 0.13459758  | empty        |        |      |                                 |
| 3269 O11 | X | 392    | 400    | -0.19306047 | 393    | 400    | -0.13605771 | 2682756  | 0.27004505  | 2491642  | 0.14890499  | experimental | Tocris | 2533 | DPO-1                           |
| 3269 O12 | E | 515    | 520    | -0.18833883 | 354    | 360    | -0.14026844 | 2618323  | 0.20512961  | 2289844  | -0.05656087 | empty        |        |      |                                 |
| 3269 O13 | X | 274    | 280    | -0.19759019 | 434    | 440    | -0.13163105 | 2084519  | -0.33267118 | 1857515  | -0.49674783 | experimental | Tocris | 2536 | Domperidone                     |
| 3269 O14 | E | 676    | 680    | -0.18215846 | 135    | 640    | -0.10992962 | 2674193  | 0.26141793  | 2323800  | -0.02198769 | empty        |        |      |                                 |
| 3269 O15 | X | 154    | 160    | -0.20219667 | 113    | 120    | -0.16628856 | 940698   | -1.48505639 | 959532   | -1.41105246 | experimental | Tocris | 2539 | IKK 16                          |
| 3269 O16 | E | 393    | 400    | -0.19302209 | 634    | 640    | -0.11003759 | 2902275  | 0.49120767  | 2478407  | 0.13542943  | empty        |        |      |                                 |
| 3269 O17 | X | 833    | 840    | -0.17613164 | 632    | 640    | -0.11025352 | 2292487  | -0.12314604 | 2493874  | 0.15117756  | experimental | Tocris | 2542 | KI 8751                         |
| 3269 O18 | E | 753    | 760    | -0.17920263 | 592    | 600    | -0.11457222 | 2879891  | 0.46865607  | 2622976  | 0.2826261   | empty        |        |      |                                 |
| 3269 O19 | X | 628    | 640    | -0.18400105 | 707    | 720    | -0.10215597 | 2603253  | 0.18994678  | 2508649  | 0.16622111  | experimental | Tocris | 2545 | Lofepramine                     |
| 3269 O20 | E | 553    | 560    | -0.1868801  | 831    | 840    | -0.08876803 | 2630547  | 0.21744514  | 2628728  | 0.28848265  | empty        |        |      |                                 |
| 3269 O21 | X | 470    | 480    | -0.19006626 | 1030   | 1040   | -0.06728253 | 2368363  | -0.04670193 | 2643399  | 0.30342031  | experimental | Tocris | 2547 | 6-Hydroxydopamine hydrochloride |
| 3269 O22 | E | 950    | 960    | -0.17164031 | 1027   | 1040   | -0.06760643 | 2432734  | 0.01815104  | 2614969  | 0.27447357  | empty        |        |      |                                 |
| 3269 O23 | E | 598    | 1280   | -0.18515267 | 847    | 1600   | -0.08704055 | 83961    | -2.3482081  | 108998   | -2.27704567 | empty        |        |      |                                 |
| 3269 O24 | P | 228536 | 230680 | 8.56479091  | 253287 | 255080 | 27.1682285  | 2251285  | -0.16465654 | 2152890  | -0.19600413 | empty        |        |      |                                 |
| 3269 P01 | N | 598    | 600    | -0.18515267 | 877    | 880    | -0.08380153 | 2013969  | -0.40374941 | 2055139  | -0.29553184 | empty        |        |      |                                 |
| 3269 P02 | E | 157    | 160    | -0.20208151 | 194    | 200    | -0.15721931 | 74555    | -2.35768453 | 76125    | -2.31051616 | empty        |        |      |                                 |
| 3269 P03 | X | 194    | 200    | -0.20066118 | 194    | 200    | -0.15754321 | 1035010  | -1.39003824 | 927852   | -1.44330827 | experimental | Tocris | 2700 | Calcipitriol                    |
| 3269 P04 | E | 675    | 680    | -0.18219684 | 836    | 840    | -0.08822819 | 2431880  | 0.01729064  | 2628882  | 0.28863945  | empty        |        |      |                                 |
| 3269 P05 | X | 836    | 840    | -0.17601648 | 595    | 600    | -0.11424831 | 2251876  | -0.16406111 | 2466162  | 0.12296187  | experimental | Tocris | 2706 | Temozolomide                    |
| 3269 P06 | E | 516    | 520    | -0.18830044 | 676    | 680    | -0.10550296 | 2560943  | 0.14731999  | 2702508  | 0.36360367  | empty        |        |      |                                 |
| 3269 P07 | X | 273    | 280    | -0.19762857 | 353    | 360    | -0.1403764  | 2369305  | -0.04575288 | 2435413  | 0.09165398  | experimental | Tocris | 2709 | Cilastatin sodium               |
| 3269 P08 | E | 435    | 440    | -0.19140982 | 272    | 280    | -0.14912176 | 2488971  | 0.0748091   | 2579857  | 0.23872338  | empty        |        |      |                                 |
| 3269 P09 | X | 716    | 720    | -0.18062296 | 1076   | 1080   | -0.06231604 | 2735016  | 0.32269634  | 2321513  | -0.02431625 | experimental | Tocris | 2718 | LY 364947                       |
| 3269 P10 | E | 473    | 480    | -0.1899511  | 593    | 600    | -0.11446425 | 2496222  | 0.0821144   | 2362273  | 0.01718459  | empty        |        |      |                                 |
| 3269 P11 | X | 1076   | 1080   | -0.1668035  | 956    | 960    | -0.07527211 | 1172986  | -1.25102916 | 1490279  | -0.87065867 | experimental | Tocris | 2721 | SB 225002                       |
| 3269 P12 | E | 594    | 600    | -0.18530622 | 355    | 360    | -0.14016047 | 2507939  | 0.09391913  | 2488687  | 0.14589628  | empty        |        |      |                                 |
| 3269 P13 | X | 516    | 520    | -0.18830044 | 436    | 440    | -0.13141512 | 2213090  | -0.20313752 | 2290405  | -0.05598967 | experimental | Tocris | 2725 | CGP 57380                       |
| 3269 P14 | E | 475    | 480    | -0.18987432 | 635    | 640    | -0.10992962 | 2624265  | 0.2111161   | 2433194  | 0.08939465  | empty        |        |      |                                 |
| 3269 P15 | X | 396    | 400    | -0.19290692 | 476    | 480    | -0.12709642 | 1984948  | -0.4329877  | 2085616  | -0.26450089 | experimental | Tocris | 2742 | Reserpine                       |
| 3269 P16 | E | 636    | 640    | -0.18369395 | 593    | 600    | -0.11446425 | 2525962  | 0.11207707  | 2545646  | 0.20389056  | empty        |        |      |                                 |
| 3269 P17 | X | 674    | 680    | -0.18223523 | 1195   | 1200   | -0.04946792 | 1998311  | -0.41952465 | 2403807  | 0.05947351  | experimental | Tocris | 2743 | Caffeic acid phenethyl ester    |
| 3269 P18 | E | 508    | 520    | -0.18860754 | 627    | 640    | -0.11079336 | 2675696  | 0.26293218  | 2884599  | 0.54900433  | empty        |        |      |                                 |
| 3269 P19 | X | 254    | 2560   | -0.11006695 | 2754   | 2760   | 0.11885312  | 2284486  | -0.13120695 | 2407244  | 0.06297298  | experimental | Tocris | 2748 | KF 38789                        |
| 3269 P20 | E | 748    | 760    | -0.17939457 | 787    | 800    | -0.09351859 | 2701792  | 0.28922357  | 2607045  | 0.26640354  | empty        |        |      |                                 |
| 3269 P21 | X | 914    | 920    | -0.17302226 | 711    | 720    | -0.10172411 | 2254254  | -0.16166531 | 2364474  | 0.01942556  | experimental | Tocris | 2755 | DCA                             |
| 3269 P22 | E | 828    | 840    | -0.17632357 | 1349   | 1360   | -0.03284096 | 2475540  | 0.06127754  | 2308984  | -0.03707298 | empty        |        |      |                                 |
| 3269 P23 | E | 1097   | 2360   | -0.16599737 | 1058   | 2120   | -0.06425945 | 78222    | -2.35399007 | 95107    | -2.29118915 | empty        |        |      |                                 |
| 3269 P24 | P | 433565 | 434240 | 16.4353179  | 363095 | 363840 | 39.0239035  | 2029245  | -0.38835903 | 1994594  | -0.3571773  | empty        |        |      |                                 |
